# Supplementary material for: Loss of Drosophila Clueless differentially affects the mitochondrial proteome compared to loss of Sod2 and Pink1
Source: Front Physiol. 2022 Oct 26;13:1004099. doi: 10.3389/fphys.2022.1004099 (PMC9644064; doi:10.3389/fphys.2022.1004099)
Supplement: Supplementary file 1 [file Table2.XLSX]

## Sheet: clu d87  vs WT
clu (D) vs WT (F): all proteins with valid abudance ratio and p values
Accession	Proteins	Description	# Unique Peptides	# AAs	Abundance Ratio: (D) / (F)	Abundance Ratio P-Value: (D) / (F)	Abundance Ratio: log2 (D) / (F)	Abundance Ratio P-Value: -log10-(D) / (F)
NP_001261287.1	alpha-Spec	alpha spectrin, isoform C [Drosophila melanogaster]	240	2447	2.281	0.00206808	1.18967	2.68443
NP_524634.2	apolpp	apolipophorin, isoform A [Drosophila melanogaster]	198	3351	1.829	0.0377305	0.871055	1.42331
NP_001162825.1	bt	bent, isoform F [Drosophila melanogaster]	163	8933	1.594	0.0195409	0.672652	1.70905
NP_001097492.2	kst	karst, isoform E [Drosophila melanogaster]	144	4337	1.429	0.230346	0.515006	0.63762
NP_001162632.2	futsch	futsch, isoform E [Drosophila melanogaster]	107	5495	2.708	0.0198172	1.43723	1.70296
NP_001188694.1	Msp300	Muscle-specific protein 300 kDa, isoform D [Drosophila melanogaster]	105	12345	2.764	0.00103263	1.46676	2.98606
NP_001262658.1	cher	cheerio, isoform M [Drosophila melanogaster]	102	2429	1.731	0.0257468	0.791606	1.58928
NP_001261304.1	sls	sallimus, isoform P [Drosophila melanogaster]	102	18468	1.458	0.0949375	0.543991	1.02256
NP_523596.2	bsf	bicoid stability factor [Drosophila melanogaster]	98	1412	0.61	0.0444951	-0.713119	1.35169
NP_001137778.2	FASN1	fatty acid synthase 1, isoform C [Drosophila melanogaster]	97	2540	2.001	0.0284888	1.00072	1.54533
NP_525064.1	lva	lava lamp, isoform C [Drosophila melanogaster]	95	2779	2.359	0.00578014	1.23818	2.23806
NP_001259282.1	CG34417	uncharacterized protein Dmel_CG34417, isoform T [Drosophila melanogaster]	89	5182	3.006	0.00329138	1.58785	2.48262
NP_724841.1	PCB	pyruvate carboxylase, isoform I [Drosophila melanogaster]	89	1197	1.944	0.00499978	0.959028	2.30105
NP_001027038.3	trol	terribly reduced optic lobes, isoform AT [Drosophila melanogaster]	86	4479	1.787	0.00203789	0.83754	2.69082
NP_609058.2	Tango1	transport and golgi organization 1, isoform A [Drosophila melanogaster]	81	1430	1.767	0.0106768	0.821302	1.97156
NP_725369.1	Opa1	optic atrophy 1, isoform A [Drosophila melanogaster]	79	972	0.853	0.732516	-0.229382	0.135183
NP_523741.2	Hsc70-5	heat shock protein cognate 5, isoform A [Drosophila melanogaster]	77	686	1.302	0.223183	0.380729	0.65134
NP_726453.1	Letm1	LETM1 ortholog, isoform A [Drosophila melanogaster]	76	1013	1.275	0.0456252	0.350497	1.3408
NP_726243.1	blw	bellwether [Drosophila melanogaster]	71	552	0.406	0.00131045	-1.30045	2.88258
NP_611063.1	Gpo-1	glycerophosphate oxidase-1, isoform C [Drosophila melanogaster]	71	724	0.63	0.0797759	-0.666576	1.09813
NP_651601.1	Gp93	glycoprotein 93 [Drosophila melanogaster]	69	787	0.928	0.995887	-0.107803	0.00179006
NP_996113.2	Lmpt	limpet, isoform K [Drosophila melanogaster]	68	2147	1.595	0.0123709	0.673556	1.9076
NP_524471.2	GluProRS	Glutamyl-prolyl-tRNA synthetase, isoform A [Drosophila melanogaster]	67	1714	7.559	0.000321779	2.9182	3.49244
NP_725511.2	Strn-Mlck	Stretchin-Mlck, isoform R [Drosophila melanogaster]	66	1918	2.842	0.022263	1.50691	1.65242
NP_001246804.1	CG9674	CG9674, isoform F [Drosophila melanogaster]	65	2115	1.611	0.00216652	0.687956	2.66424
NP_511132.2	Hsc70-3	heat shock 70-kDa protein cognate 3, isoform B [Drosophila melanogaster]	64	656	0.912	0.985438	-0.132894	0.0063707
NP_001097440.1	Unc-89	Unc-89, isoform C [Drosophila melanogaster]	63	4218	2.833	0.00776962	1.50233	2.1096
NP_727255.1	ND-75	NADH dehydrogenase (ubiquinone) 75 kDa subunit, isoform B [Drosophila melanogaster]	62	731	0.335	0.0010603	-1.57777	2.97457
NP_610299.2	Vps13	vacuolar protein sorting 13, isoform A [Drosophila melanogaster]	62	3321	2.028	0.0049137	1.02006	2.30859
NP_524996.1	bor	belphegor, isoform A [Drosophila melanogaster]	62	604	1.368	0.45926	0.452068	0.337942
NP_001246674.1	rhea	rhea, isoform B [Drosophila melanogaster]	61	2836	2.345	0.00178188	1.22959	2.74912
NP_476934.2	Myo61F	myosin 61F, isoform D [Drosophila melanogaster]	61	1052	0.337	0.00279854	-1.56918	2.55307
NP_723470.1	Mtpalpha	mitochondrial trifunctional protein alpha subunit, isoform B [Drosophila melanogaster]	60	744	0.771	0.311081	-0.375197	0.507127
NP_995670.2	Apoltp	apolipoprotein lipid transfer particle [Drosophila melanogaster]	60	4333	1.129	0.481571	0.175045	0.317339
NP_001162645.1	CG2918	CG2918, isoform B [Drosophila melanogaster]	60	923	1.028	0.999919	0.0398403	3.52418e-05
NP_730248.2	CG6512	CG6512, isoform A [Drosophila melanogaster]	59	826	0.765	0.129961	-0.386468	0.886187
NP_476617.1	LanA	laminin A [Drosophila melanogaster]	58	3712	1.927	0.00645719	0.946357	2.18996
NP_609835.2	CLIP-190	cytoplasmic linker protein 190, isoform A [Drosophila melanogaster]	58	1690	2.357	0.0281635	1.23695	1.55031
NP_523899.1	Hsp83	heat shock protein 83, isoform A [Drosophila melanogaster]	58	717	2.029	0.0728694	1.02077	1.13745
NP_524708.1	Acon	aconitase, isoform B [Drosophila melanogaster]	58	787	0.754	0.138842	-0.407364	0.857479
NP_001245581.1	Nrg	neuroglian, isoform G [Drosophila melanogaster]	57	1309	2.331	0.00072509	1.22095	3.13961
NP_610551.1	CG1371	CG1371 [Drosophila melanogaster]	57	1199	1.317	0.144586	0.397255	0.839874
NP_524356.1	Hsc70-4	heat shock protein cognate 4, isoform A [Drosophila melanogaster]	56	651	1.859	0.0017112	0.894527	2.7667
NP_524006.1	LanB2	laminin B2, isoform A [Drosophila melanogaster]	56	1639	1.973	0.0345613	0.980391	1.46141
NP_001286040.1	Acp36DE	accessory gland protein 36DE, isoform B [Drosophila melanogaster]	55	912	4.874	0.00223181	2.28511	2.65134
NP_001245892.1	Lam	lamin, isoform B [Drosophila melanogaster]	55	622	1.768	0.470841	0.822118	0.327126
NP_001263137.1	chp	chaoptin, isoform D [Drosophila melanogaster]	54	1338	2.602	0.00688431	1.37962	2.16214
NP_001097685.2	Cdep	Chondrocyte-derived ezrin-like domain containing protein, isoform G [Drosophila melanogaster]	54	4273	2.249	0.0726757	1.16928	1.13861
NP_524079.1	Pdi	protein disulfide isomerase, isoform A [Drosophila melanogaster]	54	496	0.521	0.313901	-0.940645	0.503208
NP_476590.1	Khc	kinesin heavy chain [Drosophila melanogaster]	51	975	2.12	0.00657237	1.08406	2.18228
NP_610342.1	ACC	Acetyl-CoA carboxylase, isoform A [Drosophila melanogaster]	51	2482	2.186	0.00843105	1.12829	2.07412
NP_648687.1	Hsc70Cb	Hsc70Cb, isoform A [Drosophila melanogaster]	51	804	1.308	0.0383327	0.387363	1.41643
NP_727489.1	Hsp60A	heat shock protein 60A, isoform B [Drosophila melanogaster]	51	573	0.602	0.0480953	-0.732165	1.3179
NP_723772.2	MRP	Multidrug-Resistance like protein 1, isoform A [Drosophila melanogaster]	51	1549	1.351	0.531827	0.434028	0.27423
NP_001287272.1	CG42795	uncharacterized protein Dmel_CG42795, isoform G [Drosophila melanogaster]	50	3213	4.008	0.0096939	2.00288	2.0135
NP_730838.3	eIF3-S10	eIF3-S10, isoform D [Drosophila melanogaster]	50	1140	1.91	0.0284476	0.933573	1.54595
NP_725084.2	ERp60	ERp60 [Drosophila melanogaster]	50	489	1.3	0.856474	0.378512	0.0672859
NP_730695.1	P5CDh1	delta-1-Pyrroline-5-carboxylate dehydrogenase 1, isoform A [Drosophila melanogaster]	49	574	0.697	0.0773096	-0.520769	1.11177
NP_001027277.1	CadN	Cadherin-N, isoform L [Drosophila melanogaster]	48	3101	2.58	0.00204549	1.36737	2.6892
NP_001284813.1	Vinc	vinculin, isoform B [Drosophila melanogaster]	48	961	1.901	0.004729	0.926759	2.32523
NP_001096924.2	mgl	megalin, isoform A [Drosophila melanogaster]	48	4769	1.268	0.178279	0.342555	0.748901
NP_731489.2	pug	pugilist, isoform B [Drosophila melanogaster]	47	968	2.524	0.000316957	1.33571	3.499
NP_727901.1	Chc	clathrin heavy chain, isoform B [Drosophila melanogaster]	47	1678	3.936	0.000748274	1.97673	3.12594
NP_001260128.1	Cpr	cytochrome P450 reductase, isoform C [Drosophila melanogaster]	47	679	2.032	0.0146885	1.0229	1.83302
NP_612021.1	Tudor-SN	tudor staphylococcal nuclease, isoform A [Drosophila melanogaster]	47	926	1.187	0.157263	0.24732	0.803373
NP_001260810.1	Acsl	Acyl-CoA synthetase long-chain, isoform J [Drosophila melanogaster]	47	728	0.832	0.53098	-0.265345	0.274922
NP_001027219.1	GlyP	glycogen phosphorylase, isoform B [Drosophila melanogaster]	46	844	2.084	0.107474	1.05936	0.968698
NP_001014650.2	jar	jaguar, isoform H [Drosophila melanogaster]	46	1268	1.187	0.920849	0.24732	0.0358116
NP_726631.1	ATPsynbeta	ATP synthase, beta subunit, isoform A [Drosophila melanogaster]	45	505	0.514	0.0020693	-0.96016	2.68418
NP_001246877.1	CG7470	CG7470, isoform B [Drosophila melanogaster]	45	776	2.026	0.00854335	1.01863	2.06837
NP_996339.2	CG2658	CG2658, isoform C [Drosophila melanogaster]	45	819	1.344	0.318441	0.426533	0.496971
NP_728202.1	bnb	bangles and beads, isoform B [Drosophila melanogaster]	44	442	2.274	0.313115	1.18523	0.504297
NP_523742.2	LamC	lamin C, isoform A [Drosophila melanogaster]	44	621	1.218	0.97865	0.284514	0.00937247
NP_649461.2	Cont	contactin [Drosophila melanogaster]	43	1390	2.25	0.000702527	1.16993	3.15334
NP_609408.1	LManII	lysosomal alpha-mannosidase II, isoform A [Drosophila melanogaster]	43	1080	0.853	0.808083	-0.229382	0.0925443
NP_733144.3	Ald	aldolase, isoform K [Drosophila melanogaster]	43	361	1.134	0.816813	0.181421	0.0878775
NP_524151.2	Ugt	UDP-glucose-glycoprotein glucosyltransferase [Drosophila melanogaster]	43	1548	0.98	0.999914	-0.0291463	3.7524e-05
NP_727290.1	Moe	moesin, isoform B [Drosophila melanogaster]	42	649	0.629	0.000543787	-0.668868	3.26457
NP_001097814.1	Fas1	fasciclin 1, isoform D [Drosophila melanogaster]	42	662	1.704	0.00252652	0.768925	2.59748
NP_731954.1	UQCR-C1	Ubiquinol-cytochrome c reductase core protein 1, isoform A [Drosophila melanogaster]	41	470	0.247	0.000227223	-2.01742	3.64355
NP_476768.1	trp	transient receptor potential, isoform A [Drosophila melanogaster]	41	1275	4.621	0.000725101	2.20821	3.1396
NP_001261019.1	Strn-Mlck	Stretchin-Mlck, isoform U [Drosophila melanogaster]	41	8255	3.952	0.000850802	1.98258	3.07017
NP_725882.1	SdhA	succinate dehydrogenase, subunit A (flavoprotein), isoform C [Drosophila melanogaster]	41	661	0.526	0.000920402	-0.926865	3.03602
NP_001245864.1	bark	bark beetle, isoform B [Drosophila melanogaster]	41	3123	1.721	0.00136941	0.783247	2.86347
NP_724824.1	CG1648	CG1648, isoform B [Drosophila melanogaster]	41	232	2.454	0.0402072	1.29514	1.3957
NP_001245961.1	porin	porin, isoform D [Drosophila melanogaster]	41	282	0.89	0.923385	-0.168123	0.034617
NP_523982.2	Prm	paramyosin, isoform A [Drosophila melanogaster]	41	879	0.93	0.981371	-0.104697	0.00816682
NP_001259986.1	FASN2	fatty acid synthase 2, isoform B [Drosophila melanogaster]	40	2410	2.819	0.00447417	1.49518	2.34929
NP_732653.2	CG31233	uncharacterized protein Dmel_CG31233, isoform A [Drosophila melanogaster]	40	952	0.235	0.0142813	-2.08927	1.84523
NP_524106.3	fax	failed axon connections, isoform A [Drosophila melanogaster]	40	418	3.38	0.077242	1.75702	1.11215
NP_523781.2	Dp1	Dodeca-satellite-binding protein 1, isoform G [Drosophila melanogaster]	40	1301	1.538	0.0917786	0.621056	1.03726
NP_477266.1	Vha44	vacuolar H[+] ATPase 44kD subunit, isoform A [Drosophila melanogaster]	40	388	0.831	0.36052	-0.26708	0.443071
NP_611409.2	CG7461	CG7461, isoform B [Drosophila melanogaster]	40	627	0.637	0.479648	-0.650635	0.319077
NP_728435.1	GCS2alpha	glucosidase 2 alpha subunit, isoform C [Drosophila melanogaster]	40	924	1.248	0.681249	0.319618	0.166694
NP_611265.1	OstDelta	oligosaccharide transferase delta subunit, isoform A [Drosophila melanogaster]	40	634	1.138	0.914121	0.186501	0.0389961
NP_001262747.1	CG4562	CG4562, isoform E [Drosophila melanogaster]	39	1408	0.361	0.00453214	-1.46993	2.3437
NP_001096852.1	eIF4G	eukaryotic translation initiation factor 4G, isoform B [Drosophila melanogaster]	39	1919	2.21	0.00802856	1.14405	2.09536
NP_649466.1	lost	lost [Drosophila melanogaster]	39	545	1.798	0.0311721	0.846393	1.50623
NP_477485.1	Actn	alpha actinin, isoform C [Drosophila melanogaster]	39	917	1.48	0.0960229	0.565597	1.01763
NP_476908.1	Vha55	vacuolar H[+]-ATPase 55kD subunit, isoform B [Drosophila melanogaster]	39	490	0.896	0.513528	-0.158429	0.289436
NP_648905.1	UQCR-C2	Ubiquinol-cytochrome c reductase core protein 2, isoform A [Drosophila melanogaster]	38	440	0.3	0.00116893	-1.73697	2.93221
NP_001259836.1	CG11835	uncharacterized protein Dmel_CG11835, isoform C [Drosophila melanogaster]	38	795	7.175	0.00166074	2.84298	2.7797
NP_722765.2	AIF	apoptosis inducing factor, isoform B [Drosophila melanogaster]	38	739	0.569	0.00283334	-0.813499	2.5477
NP_001246473.1	CG3499	CG3499, isoform C [Drosophila melanogaster]	38	740	0.534	0.00295915	-0.905088	2.52883
NP_536731.1	Cat	catalase [Drosophila melanogaster]	38	506	1.926	0.014476	0.945608	1.83935
NP_724357.2	EF2	elongation factor 2, isoform D [Drosophila melanogaster]	38	844	1.362	0.0159146	0.445727	1.7982
30794280		serum albumin precursor [Bos taurus]	38	607	0.342	0.0161169	-1.54793	1.79272
NP_524293.2	Calr	calreticulin, isoform A [Drosophila melanogaster]	38	406	1.707	0.604882	0.771463	0.218329
NP_525069.2	norpA	no receptor potential A, isoform A [Drosophila melanogaster]	37	1095	3.801	0.0015663	1.92638	2.80513
NP_524688.1	Mcr	macroglobulin complement-related [Drosophila melanogaster]	37	1760	2.104	0.00275718	1.07313	2.55953
NP_725339.1	shot	short stop, isoform H [Drosophila melanogaster]	37	8805	2.733	0.00702135	1.45049	2.15358
NP_001285318.1	Mfe2	peroxisomal multifunctional enzyme type 2, isoform B [Drosophila melanogaster]	37	598	2.241	0.0241395	1.16414	1.61727
NP_725252.1	TppII	tripeptidyl-peptidase II, isoform D [Drosophila melanogaster]	37	1441	1.513	0.0378406	0.597412	1.42204
NP_476812.1	PPO1	prophenoloxidase 1 [Drosophila melanogaster]	36	690	4.83	0.000664385	2.27202	3.17758
NP_524637.2	PlexA	plexin A, isoform A [Drosophila melanogaster]	36	1945	1.573	0.000851063	0.653519	3.07004
NP_610937.4	CG30069	uncharacterized protein Dmel_CG30069 [Drosophila melanogaster]	36	4012	3.077	0.00829349	1.62152	2.08126
NP_611264.2	CG5009	CG5009 [Drosophila melanogaster]	36	669	1.6	0.11917	0.678072	0.923833
NP_731737.1	Past1	putative achaete scute target 1, isoform A [Drosophila melanogaster]	36	540	1.632	0.285857	0.706641	0.543851
NP_647756.1	CPT2	carnitine palmitoyltransferase 2 [Drosophila melanogaster]	36	667	0.629	0.325717	-0.668868	0.487159
NP_001097372.1	Phb2	prohibitin 2, isoform E [Drosophila melanogaster]	36	338	0.88	0.891752	-0.184425	0.0497558
NP_730716.1	IleRS	Isoleucyl-tRNA synthetase, isoform A [Drosophila melanogaster]	35	1229	5.582	0.00310093	2.48078	2.50851
NP_477310.2	Uba1	ubiquitin activating enzyme 1, isoform A [Drosophila melanogaster]	35	1191	1.356	0.00891609	0.439357	2.04983
NP_609027.3	CG9527	CG9527, isoform A [Drosophila melanogaster]	35	703	0.764	0.0169352	-0.388355	1.77121
NP_732654.1	CG31198	uncharacterized protein Dmel_CG31198 [Drosophila melanogaster]	35	940	0.258	0.0198928	-1.95456	1.7013
NP_649168.2	Gabat	gamma-aminobutyric acid transaminase, isoform A [Drosophila melanogaster]	35	486	0.473	0.0231238	-1.08009	1.63594
NP_609397.2	CG5355	CG5355 [Drosophila melanogaster]	35	756	1.277	0.106906	0.352759	0.971
NP_733244.5	larp	La related protein, isoform D [Drosophila melanogaster]	35	1673	1.904	0.117953	0.929033	0.92829
NP_001163782.1	mesh	mesh, isoform D [Drosophila melanogaster]	35	1454	0.82	0.295179	-0.286304	0.529915
NP_722724.1	Eno	enolase, isoform E [Drosophila melanogaster]	35	500	0.861	0.452889	-0.215915	0.344009
NP_572742.1	prtp	pretaporter, isoform A [Drosophila melanogaster]	35	416	1.56	0.620013	0.641546	0.207599
NP_787122.1	Ank	ankyrin, isoform B [Drosophila melanogaster]	34	1549	2.677	3.93076e-05	1.42062	4.40552
NP_511102.3	Yp2	yolk protein 2, isoform A [Drosophila melanogaster]	34	442	0.042	0.000209008	-4.57347	3.67984
NP_649234.1	ND-39	NADH dehydrogenase (ubiquinone) 39 kDa subunit, isoform A [Drosophila melanogaster]	34	416	0.292	0.000357137	-1.77596	3.44717
NP_001285071.1	Yp1	yolk protein 1, isoform B [Drosophila melanogaster]	34	439	0.066	0.000447614	-3.92139	3.3491
NP_650696.1	Mdh2	malate dehydrogenase 2 [Drosophila melanogaster]	34	336	0.489	0.0104777	-1.03209	1.97974
NP_524448.3	PyK	pyruvate kinase, isoform A [Drosophila melanogaster]	34	533	2.169	0.0136262	1.11703	1.86563
NP_001096891.1	CG15894	uncharacterized protein Dmel_CG15894, isoform B [Drosophila melanogaster]	34	1598	3.171	0.0248816	1.66494	1.60412
NP_648149.1	CG12262	uncharacterized protein Dmel_CG12262 [Drosophila melanogaster]	34	419	0.667	0.0512618	-0.584241	1.29021
NP_524550.1	ATPsyngamma	ATP synthase, gamma subunit, isoform A [Drosophila melanogaster]	34	297	0.385	0.0550929	-1.37707	1.2589
NP_728614.1	Psa	puromycin sensitive aminopeptidase, isoform C [Drosophila melanogaster]	34	1075	1.569	0.0609371	0.649845	1.21512
NP_523815.2	nahoda	nahoda, isoform A [Drosophila melanogaster]	34	1335	2.054	0.0675018	1.03844	1.17068
NP_727450.1	sesB	stress-sensitive B, isoform B [Drosophila melanogaster]	34	299	0.419	0.126169	-1.25498	0.899047
NP_650477.1	AOX3	aldehyde oxidase 3, isoform A [Drosophila melanogaster]	34	1254	1.006	0.999983	0.00863031	7.30483e-06
NP_523401.2	Tsf1	transferrin 1, isoform A [Drosophila melanogaster]	33	641	2.329	0.000580504	1.21971	3.2362
NP_001137754.1	prom	prominin, isoform D [Drosophila melanogaster]	33	1235	3.108	0.00184277	1.63599	2.73453
NP_476819.2	AP-2alpha	adaptor protein complex 2, alpha subunit, isoform A [Drosophila melanogaster]	33	940	2.222	0.00295652	1.15186	2.52922
NP_001284854.1	Fas2	fasciclin 2, isoform G [Drosophila melanogaster]	33	885	1.554	0.0077592	0.635987	2.11018
NP_001285297.1	mRpS30	mitochondrial ribosomal protein S30, isoform B [Drosophila melanogaster]	33	557	0.521	0.0509739	-0.940645	1.29265
NP_649812.2	CG8036	CG8036, isoform B [Drosophila melanogaster]	33	626	1.281	0.092579	0.35727	1.03349
NP_001137910.2	Idh	isocitrate dehydrogenase, isoform K [Drosophila melanogaster]	33	479	1.408	0.128196	0.493647	0.892126
NP_731237.1	DppIII	dipeptidyl aminopeptidase III, isoform C [Drosophila melanogaster]	33	786	0.787	0.224961	-0.345564	0.647894
NP_650327.1	Cyp6d5	Cyp6d5 [Drosophila melanogaster]	33	508	0.729	0.596017	-0.456009	0.224741
NP_525031.1	Cyp4g1	cytochrome P450-4g1 [Drosophila melanogaster]	33	556	1.226	0.597192	0.293959	0.223886
NP_727696.2	CG1640	CG1640, isoform B [Drosophila melanogaster]	33	575	0.847	0.676157	-0.239566	0.169953
NP_651762.1	CG7920	CG7920, isoform A [Drosophila melanogaster]	33	477	0.938	0.985458	-0.0923402	0.00636209
NP_524538.2	RpL4	ribosomal protein L4 [Drosophila melanogaster]	33	401	0.963	0.999499	-0.0543923	0.000217688
NP_524445.1	ND-42	NADH dehydrogenase (ubiquinone) 42 kDa subunit, isoform A [Drosophila melanogaster]	32	407	0.199	7.18694e-06	-2.32916	5.14346
NP_001245921.1	CG18304	uncharacterized protein Dmel_CG18304, isoform B [Drosophila melanogaster]	32	1819	4.609	0.00066248	2.20445	3.17883
NP_001245922.1	uif	uninflatable, isoform D [Drosophila melanogaster]	32	3589	4.753	0.00122108	2.24884	2.91326
NP_608827.1	Tps1	Trehalose-6-phosphate synthase 1 [Drosophila melanogaster]	32	809	2.566	0.0103562	1.35952	1.9848
NP_001246015.1	Vha68-2	vacuolar H[+] ATPase 68 kDa subunit 2, isoform D [Drosophila melanogaster]	32	614	0.801	0.0561408	-0.320126	1.25072
NP_611787.2	Golgin245	Golgin-245 [Drosophila melanogaster]	32	1489	1.577	0.217196	0.657183	0.663148
NP_995656.1	AlaRS	Alanyl-tRNA synthetase, isoform B [Drosophila melanogaster]	32	966	1.284	0.225758	0.360645	0.646358
NP_477439.2	Trap1	Trap1, isoform A [Drosophila melanogaster]	32	691	0.755	0.394533	-0.405451	0.403916
NP_650722.1	Vha100-2	vacuolar H[+] ATPase 100kD subunit 2, isoform B [Drosophila melanogaster]	32	834	1.104	0.82037	0.14274	0.0859903
NP_511148.2	Yp3	yolk protein 3, isoform A [Drosophila melanogaster]	31	420	0.042	0.000440066	-4.57347	3.35648
NP_650648.3	Pxt	Peroxinectin-like [Drosophila melanogaster]	31	809	0.295	0.000565406	-1.76121	3.24764
NP_523497.2	ade3	adenosine 3, isoform A [Drosophila melanogaster]	31	1353	1.953	0.00708323	0.965692	2.14977
NP_525109.1	Rab32	Rab32, isoform B [Drosophila melanogaster]	31	686	1.635	0.0111816	0.709291	1.9515
NP_609536.1	Tom70	translocase of outer membrane 70, isoform A [Drosophila melanogaster]	31	589	0.808	0.0505428	-0.307573	1.29634
NP_001247302.1	Nup358	nucleoporin 358kD, isoform B [Drosophila melanogaster]	31	2718	1.253	0.147009	0.325386	0.832655
NP_572371.1	CG4586	CG4586 [Drosophila melanogaster]	31	677	1.235	0.831062	0.304511	0.0803667
NP_652032.1	Sply	Sphingosine-1-phosphate lyase, isoform A [Drosophila melanogaster]	31	545	0.91	0.849936	-0.136062	0.0706137
NP_652000.1	Ef1gamma	Ef1gamma, isoform A [Drosophila melanogaster]	31	431	0.857	0.932224	-0.222633	0.0304799
NP_524316.1	RpL3	ribosomal protein L3, isoform A [Drosophila melanogaster]	31	416	1.008	0.999993	0.0114956	3.06822e-06
NP_001261317.1	zormin	zormin, isoform J [Drosophila melanogaster]	30	3664	3.627	6.53084e-05	1.85878	4.18503
NP_001036397.2	Slmap	sarcolemma associated protein, isoform D [Drosophila melanogaster]	30	897	4.045	0.000194454	2.01614	3.71118
NP_524415.1	TFAM	mitochondrial transcription factor A, isoform A [Drosophila melanogaster]	30	257	0.362	0.000872294	-1.46594	3.05934
NP_727091.1	kdn	knockdown, isoform B [Drosophila melanogaster]	30	522	0.486	0.00216335	-1.04097	2.66487
NP_728643.2	ABCB7	ATP binding cassette subfamily B member 7, isoform B [Drosophila melanogaster]	30	709	0.465	0.00664056	-1.1047	2.1778
NP_477378.1	Thiolase	thiolase [Drosophila melanogaster]	30	469	0.595	0.00707029	-0.749038	2.15056
NP_651314.1	CG11771	uncharacterized protein Dmel_CG11771 [Drosophila melanogaster]	30	730	0.541	0.0121864	-0.8863	1.91412
NP_609188.4	Piezo	piezo, isoform J [Drosophila melanogaster]	30	2621	2.356	0.0160206	1.23634	1.79532
NP_650190.1	CG5167	CG5167 [Drosophila melanogaster]	30	431	1.192	0.40789	0.253384	0.389457
NP_723146.1	ade2	adenosine 2, isoform B [Drosophila melanogaster]	29	1354	2.352	0.000478737	1.23389	3.3199
NP_611675.2	CG4752	CG4752 [Drosophila melanogaster]	29	1294	3.201	0.00157335	1.67852	2.80317
NP_001188817.2	CG4587	CG4587, isoform I [Drosophila melanogaster]	29	1271	2.502	0.00165682	1.32308	2.78072
NP_649690.1	Ufl1	UFM1 specific ligase 1, isoform A [Drosophila melanogaster]	29	782	1.557	0.00547951	0.638769	2.26126
NP_727348.2	Cubn	cubilin [Drosophila melanogaster]	29	3750	1.652	0.0155003	0.724214	1.80966
NP_001189286.1	CG11089	uncharacterized protein Dmel_CG11089, isoform B [Drosophila melanogaster]	29	590	1.822	0.0282036	0.865523	1.5497
NP_001163558.1	skap	skpA associated protein, isoform C [Drosophila melanogaster]	29	503	1.688	0.0295906	0.755315	1.52885
NP_524060.2	Hml	hemolectin, isoform A [Drosophila melanogaster]	29	3843	1.9	0.0523131	0.925999	1.28139
NP_524358.2	ATPsynO	ATP synthase, oligomycin sensitivity conferring protein [Drosophila melanogaster]	29	209	0.173	0.0556973	-2.53116	1.25417
NP_724562.2	Aldh-III	aldehyde dehydrogenase type III, isoform Q [Drosophila melanogaster]	29	564	1.388	0.0600587	0.473008	1.22142
NP_523506.1	Tep2	Thioester-containing protein 2, isoform A [Drosophila melanogaster]	29	1420	1.446	0.0610244	0.532068	1.2145
NP_723319.1	LanB1	LanB1, isoform B [Drosophila melanogaster]	29	1788	1.855	0.0655318	0.891419	1.18355
NP_523528.1	yip2	yippee interacting protein 2 [Drosophila melanogaster]	29	398	0.813	0.162433	-0.298673	0.789325
NP_476760.1	Top2	topoisomerase 2, isoform A [Drosophila melanogaster]	29	1447	0.821	0.835642	-0.284546	0.0779797
NP_649650.2	CRAT	carnitine O-Acetyl-Transferase, isoform A [Drosophila melanogaster]	29	662	1.157	0.871991	0.210389	0.0594881
NP_001262356.1	CD98hc	CD98 heavy chain, isoform D [Drosophila melanogaster]	29	567	1.026	0.996961	0.0370307	0.00132193
NP_001246231.1	Etf-QO	electron transfer flavoprotein-ubiquinone oxidoreductase, isoform B [Drosophila melanogaster]	28	604	0.628	8.56216e-05	-0.671164	4.06742
NP_572278.1	CG3011	CG3011, isoform A [Drosophila melanogaster]	28	537	1.691	0.00850921	0.757877	2.07011
NP_524243.2	Rm62	Rm62, isoform A [Drosophila melanogaster]	28	719	0.527	0.0113186	-0.924125	1.94621
NP_524877.1	comt	comatose, isoform A [Drosophila melanogaster]	28	745	2.097	0.0128784	1.06833	1.89014
NP_733465.1	Map205	Microtubule-associated protein 205, isoform B [Drosophila melanogaster]	28	1185	3.072	0.0219127	1.61918	1.6593
NP_649521.1	CG12163	uncharacterized protein Dmel_CG12163, isoform B [Drosophila melanogaster]	28	475	0.745	0.0282158	-0.424688	1.54951
NP_609118.1	muc	midline uncoordinated, isoform B [Drosophila melanogaster]	28	512	0.526	0.0835848	-0.926865	1.07787
NP_523836.2	Adk2	adenylate kinase 2 [Drosophila melanogaster]	28	240	0.57	0.119355	-0.810966	0.923161
NP_001162940.3	Fatp	fatty acid (long chain) transport protein, isoform F [Drosophila melanogaster]	28	746	1.53	0.228212	0.613532	0.641662
NP_788675.1	CG9297	CG9297, isoform A [Drosophila melanogaster]	28	930	1.94	0.239256	0.956057	0.621137
NP_001285254.1	CG9509	CG9509, isoform B [Drosophila melanogaster]	28	646	1.26	0.540603	0.333424	0.267122
NP_524880.2	Men	malic enzyme, isoform B [Drosophila melanogaster]	28	763	1.17	0.870605	0.226509	0.0601789
NP_001027290.1	His1:CG33807	histone H1 [Drosophila melanogaster]	28	256	0.762	0.966088	-0.392137	0.0149832
NP_001246470.1	inaD	inactivation no afterpotential D, isoform B [Drosophila melanogaster]	27	686	3.898	9.52137e-05	1.96273	4.0213
NP_996433.1	yl	yolkless, isoform B [Drosophila melanogaster]	27	1984	0.134	0.00074399	-2.8997	3.12843
NP_524044.1	Tsf2	transferrin 2 [Drosophila melanogaster]	27	819	1.91	0.00331234	0.933573	2.47986
NP_001261404.1	Rop	Ras opposite, isoform B [Drosophila melanogaster]	27	597	1.567	0.00345014	0.648005	2.46216
NP_001163786.1	RhoGAP100F	Rho GTPase activating protein at 100F, isoform D [Drosophila melanogaster]	27	1866	2.686	0.00480681	1.42546	2.31814
NP_524601.2	Alp4	alkaline phosphatase 4, isoform A [Drosophila melanogaster]	27	596	0.295	0.00501583	-1.76121	2.29966
NP_723896.1	vig	vasa intronic gene, isoform B [Drosophila melanogaster]	27	490	4.291	0.00647852	2.10131	2.18852
NP_001260222.1	poe	purity of essence, isoform B [Drosophila melanogaster]	27	5322	2.454	0.0129531	1.29514	1.88763
NP_001260946.1	ValRS	Valyl-tRNA synthetase, isoform C [Drosophila melanogaster]	27	1055	1.32	0.0190957	0.400538	1.71907
NP_476906.1	Crys	crystallin, isoform A [Drosophila melanogaster]	27	477	0.539	0.0316998	-0.891643	1.49894
NP_477033.1	Tig	tiggrin, isoform A [Drosophila melanogaster]	27	2188	1.517	0.0504024	0.601221	1.29755
NP_723596.1	Myo31DF	myosin 31DF, isoform B [Drosophila melanogaster]	27	1011	0.637	0.0992263	-0.650635	1.00337
NP_001260290.1	Aldh	aldehyde dehydrogenase, isoform B [Drosophila melanogaster]	27	520	0.671	0.212729	-0.575615	0.672173
NP_001163012.2	l(2)37Cc	lethal (2) 37Cc, isoform D [Drosophila melanogaster]	27	276	0.725	0.270487	-0.463947	0.567854
NP_648895.1	TyrRS	Tyrosyl-tRNA synthetase [Drosophila melanogaster]	27	525	1.143	0.308743	0.192825	0.510403
NP_573066.1	Tcp-1zeta	T-cp1zeta [Drosophila melanogaster]	27	533	1.362	0.561514	0.445727	0.25064
NP_001262379.1	bel	belle, isoform B [Drosophila melanogaster]	27	801	1.352	0.635094	0.435095	0.197162
NP_001137776.1	Rrp1	recombination repair protein 1, isoform B [Drosophila melanogaster]	27	706	0.721	0.65524	-0.471929	0.183599
NP_651221.1	CG6178	CG6178 [Drosophila melanogaster]	27	544	1.263	0.669045	0.336855	0.174544
NP_650475.1	AOX1	aldehyde oxidase 1 [Drosophila melanogaster]	27	1273	0.841	0.697826	-0.249822	0.156253
NP_524261.1	alpha-Est7	alpha-Esterase-7 [Drosophila melanogaster]	27	572	1.361	0.707153	0.444667	0.150487
NP_001033891.1	RpL13	ribosomal protein L13, isoform B [Drosophila melanogaster]	27	218	1.096	0.92611	0.132248	0.0333373
NP_476566.1	Gpdh	glycerol 3 phosphate dehydrogenase, isoform C [Drosophila melanogaster]	27	353	1.034	0.996914	0.0482362	0.0013425
NP_001247287.1	Esyt2	extended synaptotagmin-like protein 2, isoform C [Drosophila melanogaster]	26	853	3.14	0.000164685	1.65076	3.78335
NP_651727.1	CG7834	CG7834, isoform A [Drosophila melanogaster]	26	253	0.445	0.000244605	-1.16812	3.61153
NP_001285378.1	ND-24	NADH dehydrogenase (ubiquinone) 24 kDa subunit, isoform B [Drosophila melanogaster]	26	242	0.294	0.00117586	-1.76611	2.92965
NP_524402.1	ATPsynD	ATP synthase, subunit D, isoform A [Drosophila melanogaster]	26	178	0.267	0.00147729	-1.90509	2.83053
NP_723104.2	Hsp60C	heat shock protein 60C, isoform A [Drosophila melanogaster]	26	576	6.297	0.00177107	2.65466	2.75177
NP_650718.2	CG14309	uncharacterized protein Dmel_CG14309 [Drosophila melanogaster]	26	966	0.081	0.0021306	-3.62593	2.6715
NP_650572.2	Cctgamma	cctgamma, isoform A [Drosophila melanogaster]	26	544	1.703	0.00325057	0.768078	2.48804
NP_723468.1	jp	junctophilin, isoform B [Drosophila melanogaster]	26	1054	3.914	0.00342677	1.96864	2.46512
NP_730941.1	Itp-r83A	inositol 1,4,5,-tris-phosphate receptor, isoform B [Drosophila melanogaster]	26	2837	1.753	0.00460246	0.809826	2.33701
NP_727108.1	l(1)G0255	lethal (1) G0255, isoform B [Drosophila melanogaster]	26	467	0.505	0.00543487	-0.985645	2.26481
NP_647808.1	CG14961	uncharacterized protein Dmel_CG14961 [Drosophila melanogaster]	26	914	7.443	0.00737514	2.89588	2.13223
NP_569845.2	CG17896	uncharacterized protein Dmel_CG17896, isoform B [Drosophila melanogaster]	26	520	0.708	0.0146152	-0.498179	1.83519
NP_001033943.2	NAT1	NAT1, isoform D [Drosophila melanogaster]	26	1488	2.254	0.0187697	1.17249	1.72654
NP_608912.1	Cyp28d1	Cyp28d1 [Drosophila melanogaster]	26	502	1.364	0.0219959	0.447844	1.65766
NP_477049.2	Gp150	Gp150, isoform D [Drosophila melanogaster]	26	1076	1.303	0.0592962	0.381837	1.22697
NP_611853.2	CG2970	CG2970, isoform A [Drosophila melanogaster]	26	366	0.602	0.138111	-0.732165	0.859772
NP_727374.1	Idgf4	imaginal disc growth factor 4, isoform B [Drosophila melanogaster]	26	442	2.33	0.138453	1.22033	0.858699
NP_651896.1	CG2118	CG2118, isoform A [Drosophila melanogaster]	26	698	0.843	0.591459	-0.246395	0.228076
NP_001015405.3	FASN3	fatty acid synthase 3 [Drosophila melanogaster]	26	2394	0.884	0.763232	-0.177882	0.117344
NP_476627.3	Mal-A1	maltase A1 [Drosophila melanogaster]	26	577	1.41	0.845688	0.495695	0.0727901
NP_610418.1	CG8258	CG8258 [Drosophila melanogaster]	26	546	1.277	0.898797	0.352759	0.0463383
NP_648884.1	Cpr72Ec	cuticular protein 72Ec [Drosophila melanogaster]	26	429	0.947	0.997884	-0.0785637	0.000920049
NP_477257.2	Idgf2	imaginal disc growth factor 2, isoform A [Drosophila melanogaster]	25	440	2.36	7.32799e-05	1.23879	4.13502
NP_523868.1	Lsp1gamma	larval serum protein 1 gamma [Drosophila melanogaster]	25	772	24.199	0.000306492	4.59688	3.51358
NP_001027115.1	Hsp22	heat shock protein 22, isoform A [Drosophila melanogaster]	25	174	52.037	0.000329643	5.70147	3.48196
NP_524219.1	alpha-Cat	alpha catenin, isoform A [Drosophila melanogaster]	25	917	2.661	0.00040834	1.41197	3.38898
NP_611979.1	pain	painless, isoform A [Drosophila melanogaster]	25	913	1.417	0.00401254	0.50284	2.39658
NP_001104391.2	uex	unextended, isoform E [Drosophila melanogaster]	25	834	1.609	0.00412702	0.686164	2.38436
NP_001027395.1	Spn43Ab	serpin 43Ab [Drosophila melanogaster]	25	393	2.062	0.00561792	1.04404	2.25042
NP_610181.2	CG17337	uncharacterized protein Dmel_CG17337, isoform A [Drosophila melanogaster]	25	478	1.359	0.00841309	0.442545	2.07504
NP_523976.1	Arr2	arrestin 2 [Drosophila melanogaster]	25	401	2.329	0.0110895	1.21971	1.95509
NP_722745.1	Got2	glutamate oxaloacetate transaminase 2, isoform B [Drosophila melanogaster]	25	431	0.554	0.0496911	-0.852042	1.30372
NP_724293.2	CG9331	CG9331, isoform A [Drosophila melanogaster]	25	364	0.791	0.103679	-0.33825	0.984311
NP_650328.1	CG3061	CG3061 [Drosophila melanogaster]	25	370	1.684	0.111009	0.751892	0.954641
NP_611353.1	CG5482	CG5482, isoform A [Drosophila melanogaster]	25	397	1.585	0.142684	0.664483	0.845624
NP_477081.1	Idgf6	imaginal disc growth factor 6, isoform A [Drosophila melanogaster]	25	452	1.902	0.329064	0.927517	0.48272
NP_572320.2	Marf	mitochondrial assembly regulatory factor, isoform D [Drosophila melanogaster]	25	814	1.188	0.396566	0.248535	0.401685
NP_733230.1	CG12428	uncharacterized protein Dmel_CG12428, isoform A [Drosophila melanogaster]	25	618	1.403	0.504498	0.488515	0.297141
NP_649099.1	CG9629	CG9629 [Drosophila melanogaster]	25	540	1.106	0.910606	0.145351	0.0406694
NP_523886.1	RpL23A	ribosomal protein L23A [Drosophila melanogaster]	25	277	1.12	0.994	0.163499	0.00261377
NP_727948.1	CG9911	CG9911, isoform D [Drosophila melanogaster]	25	412	0.929	0.994123	-0.106249	0.00256008
NP_001259972.1	NTPase	NTPase, isoform F [Drosophila melanogaster]	24	524	2.158	7.05559e-05	1.10969	4.15147
NP_608562.4	IA-2	IA-2 protein tyrosine phosphatase, isoform C [Drosophila melanogaster]	24	1319	2.403	0.00238985	1.26484	2.62163
NP_001162875.1	Rtnl1	Reticulon-like1, isoform H [Drosophila melanogaster]	24	607	4.12	0.00247188	2.04264	2.60697
NP_651926.1	ND-49	NADH dehydrogenase (ubiquinone) 49 kDa subunit, isoform A [Drosophila melanogaster]	24	468	0.319	0.00253638	-1.64837	2.59579
NP_647775.1	ND-30	NADH dehydrogenase (ubiquinone) 30 kDa subunit [Drosophila melanogaster]	24	265	0.225	0.00360155	-2.152	2.44351
NP_524776.1	ergic53	ergic53, isoform A [Drosophila melanogaster]	24	512	1.506	0.012971	0.590722	1.88703
NP_476831.1	Mdr65	multi drug resistance 65 [Drosophila melanogaster]	24	1302	1.891	0.0139373	0.919149	1.85582
NP_732652.1	CG31343	uncharacterized protein Dmel_CG31343 [Drosophila melanogaster]	24	961	0.27	0.0147872	-1.88897	1.83011
NP_572302.2	Rbcn-3A	Rabconnectin-3A [Drosophila melanogaster]	24	3426	1.958	0.0174511	0.969381	1.75818
NP_524033.2	yps	ypsilon schachtel, isoform A [Drosophila melanogaster]	24	352	2.331	0.0262833	1.22095	1.58032
NP_524618.1	RpS3A	ribosomal protein S3A, isoform A [Drosophila melanogaster]	24	268	1.516	0.0324116	0.60027	1.4893
NP_001015316.1	CG17514	uncharacterized protein Dmel_CG17514, isoform A [Drosophila melanogaster]	24	2630	1.762	0.0511421	0.817214	1.29122
NP_726025.1	Treh	trehalase, isoform C [Drosophila melanogaster]	24	596	0.413	0.0628272	-1.27579	1.20185
NP_001260590.1	Tep4	Thioester-containing protein 4, isoform C [Drosophila melanogaster]	24	1498	0.759	0.0987272	-0.397828	1.00556
NP_609490.1	CG6230	CG6230 [Drosophila melanogaster]	24	1225	1.195	0.169314	0.257011	0.771307
NP_730957.1	Vha26	vacuolar H[+]-ATPase 26kD subunit, isoform A [Drosophila melanogaster]	24	226	0.368	0.181628	-1.44222	0.740818
NP_523750.2	scb	scab, isoform B [Drosophila melanogaster]	24	1115	1.203	0.214338	0.266637	0.668901
NP_731573.1	sals	sarcomere length short, isoform B [Drosophila melanogaster]	24	935	1.825	0.230702	0.867896	0.636948
NP_524887.2	Gtp-bp	GTP-binding protein [Drosophila melanogaster]	24	614	1.357	0.24548	0.440421	0.609984
NP_524011.1	ATPsynB	ATP synthase, subunit B [Drosophila melanogaster]	24	243	0.337	0.266912	-1.56918	0.573632
NP_729438.1	Galk	galactokinase, isoform A [Drosophila melanogaster]	24	490	1.354	0.321761	0.437228	0.492467
NP_001247129.1	msps	mini spindles, isoform D [Drosophila melanogaster]	24	2082	1.324	0.364264	0.404903	0.438584
NP_649017.1	CG7430	CG7430, isoform A [Drosophila melanogaster]	24	504	0.847	0.522359	-0.239566	0.282031
NP_523735.2	Cp1	cysteine proteinase-1, isoform C [Drosophila melanogaster]	24	371	0.732	0.541334	-0.450084	0.266535
NP_733083.1	vig2	vig2, isoform B [Drosophila melanogaster]	24	443	1.587	0.59197	0.666302	0.227701
NP_001027175.1	sea	scheggia, isoform E [Drosophila melanogaster]	24	317	0.759	0.754277	-0.397828	0.122469
NP_649008.2	NUCB1	NUCB1 [Drosophila melanogaster]	24	569	1.334	0.92822	0.415759	0.0323491
NP_651888.1	CG1910	CG1910, isoform A [Drosophila melanogaster]	24	489	1.172	0.981614	0.228973	0.00805938
NP_524286.1	D1	D1 chromosomal protein, isoform A [Drosophila melanogaster]	24	355	0.98	0.999997	-0.0291463	1.42071e-06
NP_477134.1	RpL22	ribosomal protein L22 [Drosophila melanogaster]	24	299	1.015	0.999999	0.0214797	5.28953e-07
NP_001285396.1	Vps4	vacuolar protein sorting 4, isoform B [Drosophila melanogaster]	23	442	2.349	0.000419081	1.23205	3.3777
NP_599138.3	Dhod	dihydroorotate dehydrogenase, isoform D [Drosophila melanogaster]	23	405	0.568	0.000767014	-0.816037	3.1152
NP_477354.1	Hop	Hsp70/Hsp90 organizing protein [Drosophila melanogaster]	23	490	2.522	0.000977907	1.33457	3.0097
NP_524469.2	Rpt2	regulatory particle triple-A ATPase 2, isoform A [Drosophila melanogaster]	23	439	2.731	0.00165875	1.44943	2.78022
NP_001246118.1	Dap160	dynamin associated protein 160, isoform D [Drosophila melanogaster]	23	1190	2.474	0.00458976	1.30685	2.33821
NP_001245953.1	Gdi	GDP dissociation inhibitor, isoform B [Drosophila melanogaster]	23	443	1.349	0.00610966	0.43189	2.21398
NP_477064.1	pnut	peanut, isoform A [Drosophila melanogaster]	23	539	2.025	0.0103417	1.01792	1.98541
NP_788622.1	Mical	molecule interacting with CasL, isoform C [Drosophila melanogaster]	23	4723	4.11	0.0108207	2.03914	1.96574
NP_476722.1	shg	shotgun [Drosophila melanogaster]	23	1507	1.539	0.0122509	0.621993	1.91183
NP_001247017.1	Fmr1	Fmr1, isoform G [Drosophila melanogaster]	23	729	2.245	0.0140686	1.16672	1.85175
NP_650015.3	CG45076	uncharacterized protein Dmel_CG45076, isoform A [Drosophila melanogaster]	23	619	2.754	0.0192076	1.46153	1.71653
NP_723725.1	ThrRS	Threonyl-tRNA synthetase, isoform A [Drosophila melanogaster]	23	747	1.819	0.0388206	0.863146	1.41094
NP_477101.1	SdhB	succinate dehydrogenase, subunit B (iron-sulfur) [Drosophila melanogaster]	23	297	0.481	0.0545884	-1.05589	1.2629
NP_648273.1	Srp68	signal recognition particle protein 68 [Drosophila melanogaster]	23	604	1.559	0.0546945	0.640621	1.26206
NP_610184.2	Gp210	glycoprotein 210 kDa, isoform A [Drosophila melanogaster]	23	1876	0.584	0.0584649	-0.77596	1.2331
NP_611562.2	CG44245	uncharacterized protein Dmel_CG44245, isoform A [Drosophila melanogaster]	23	436	2.026	0.0605929	1.01863	1.21758
NP_524303.2	Irp-1B	iron regulatory protein 1B [Drosophila melanogaster]	23	899	1.932	0.0669651	0.950095	1.17415
NP_570027.1	ttm50	tiny tim 50, isoform A [Drosophila melanogaster]	23	428	0.774	0.103673	-0.369595	0.984333
NP_651578.1	CG5590	CG5590 [Drosophila melanogaster]	23	412	1.79	0.121021	0.83996	0.917141
NP_650283.1	Droj2	DnaJ-like-2, isoform A [Drosophila melanogaster]	23	403	1.52	0.122441	0.604071	0.912075
NP_651391.1	tobi	target of brain insulin [Drosophila melanogaster]	23	657	2.499	0.163248	1.32135	0.787153
NP_724181.1	CG17544	uncharacterized protein Dmel_CG17544, isoform C [Drosophila melanogaster]	23	693	0.605	0.165168	-0.724993	0.782074
NP_608494.2	CG3164	CG3164, isoform B [Drosophila melanogaster]	23	698	1.358	0.255163	0.441483	0.593182
NP_001260072.1	vkg	viking, isoform C [Drosophila melanogaster]	23	1940	1.597	0.331439	0.675364	0.479596
NP_001163144.1	EfTuM	elongation factor Tu mitochondrial, isoform B [Drosophila melanogaster]	23	489	0.802	0.409561	-0.318326	0.387682
NP_572524.1	CG7033	CG7033 [Drosophila melanogaster]	23	535	1.241	0.459627	0.311503	0.337594
NP_523724.2	Mdr49	multi drug resistance 49, isoform A [Drosophila melanogaster]	23	1302	0.79	0.467532	-0.340075	0.330188
NP_001259956.1	Pgk	phosphoglycerate kinase, isoform B [Drosophila melanogaster]	23	415	0.83	0.55004	-0.268817	0.259606
NP_724569.1	didum	dilute class unconventional myosin, isoform C [Drosophila melanogaster]	23	1800	1.182	0.649511	0.24123	0.187414
NP_524613.1	FeCH	ferrochelatase, isoform A [Drosophila melanogaster]	23	384	1.159	0.932995	0.212881	0.0301207
NP_650786.2	CG11779	uncharacterized protein Dmel_CG11779, isoform A [Drosophila melanogaster]	23	459	0.953	0.95629	-0.0694519	0.0194104
NP_649950.1	CG8507	CG8507 [Drosophila melanogaster]	23	379	0.813	0.978217	-0.298673	0.00956465
NP_650318.1	Dip-B	dipeptidase B, isoform A [Drosophila melanogaster]	23	508	1.014	0.999002	0.0200577	0.000433453
NP_572669.2	Myo10A	myosin 10A, isoform C [Drosophila melanogaster]	22	3054	4.567	0.000324712	2.19125	3.4885
NP_001285657.1	ND-51	NADH dehydrogenase (ubiquinone) 51 kDa subunit, isoform B [Drosophila melanogaster]	22	474	0.303	0.000342986	-1.72261	3.46472
NP_729787.2	Nrx-IV	neurexin IV, isoform B [Drosophila melanogaster]	22	1284	2.067	0.00135001	1.04754	2.86966
NP_647880.1	CG1309	CG1309 [Drosophila melanogaster]	22	524	1.618	0.00215328	0.694212	2.6669
NP_477473.1	Rpt1	regulatory particle triple-A ATPase 1 [Drosophila melanogaster]	22	433	2.824	0.00307474	1.49774	2.51219
NP_001262024.1	CG3961	CG3961, isoform E [Drosophila melanogaster]	22	666	1.756	0.00332452	0.812293	2.47827
NP_001162765.1	MSBP	membrane steroid binding protein, isoform B [Drosophila melanogaster]	22	248	1.403	0.00483444	0.488515	2.31565
NP_726720.3	CG3638	CG3638, isoform G [Drosophila melanogaster]	22	1472	2.274	0.0065008	1.18523	2.18703
NP_523377.1	r	rudimentary, isoform A [Drosophila melanogaster]	22	2224	2.539	0.0070573	1.34426	2.15136
NP_726187.1	wdp	windpipe, isoform A [Drosophila melanogaster]	22	677	1.776	0.0139743	0.828632	1.85467
NP_001286077.1	CG10639	uncharacterized protein Dmel_CG10639, isoform C [Drosophila melanogaster]	22	455	0.68	0.0159508	-0.556393	1.79722
NP_001285923.1	bgm	bubblegum, isoform C [Drosophila melanogaster]	22	666	0.364	0.0160571	-1.45799	1.79433
NP_001260388.1	Vha100-5	vacuolar H[+] ATPase 100kD subunit 5, isoform B [Drosophila melanogaster]	22	814	0.314	0.0172415	-1.67116	1.76343
NP_727588.2	regucalcin	regucalcin, isoform D [Drosophila melanogaster]	22	319	1.941	0.0209578	0.9568	1.67866
NP_726062.2	CG9485	CG9485, isoform B [Drosophila melanogaster]	22	1629	1.604	0.0575738	0.681674	1.23977
NP_652604.2	c12.2	c12.2, isoform A [Drosophila melanogaster]	22	1386	0.693	0.0752543	-0.529073	1.12347
NP_001246589.1	Usp5	ubiquitin specific protease 5, isoform B [Drosophila melanogaster]	22	827	1.323	0.0911652	0.403813	1.04017
NP_572988.1	pdgy	pudgy, isoform A [Drosophila melanogaster]	22	597	1.367	0.161778	0.451013	0.791081
NP_611242.1	eIF3-S8	eIF3-S8, isoform A [Drosophila melanogaster]	22	910	1.552	0.222617	0.634129	0.652441
NP_572181.4	l(1)G0334	lethal (1) G0334, isoform A [Drosophila melanogaster]	22	399	0.617	0.342634	-0.696658	0.46517
NP_610687.1	Egm	enigma [Drosophila melanogaster]	22	639	0.757	0.552834	-0.401635	0.257405
NP_726217.2	CG2852	CG2852, isoform D [Drosophila melanogaster]	22	205	1.329	0.780502	0.410341	0.107626
NP_996412.1	CG1561	CG1561 [Drosophila melanogaster]	22	635	0.949	0.936302	-0.07552	0.0285841
NP_650189.1	Cyp9f2	Cyp9f2 [Drosophila melanogaster]	22	516	0.922	0.936323	-0.117161	0.0285744
NP_477375.1	Ef1alpha48D	elongation factor 1alpha48D, isoform A [Drosophila melanogaster]	22	463	0.931	0.980719	-0.103147	0.00845545
NP_476664.2	Ote	otefin [Drosophila melanogaster]	22	424	0.884	0.988968	-0.177882	0.00481794
NP_001285253.1	CG9512	CG9512, isoform B [Drosophila melanogaster]	22	623	1.047	0.999154	0.0662614	0.000367532
NP_651876.1	RpL6	ribosomal protein L6, isoform B [Drosophila melanogaster]	22	262	1.054	0.999306	0.0758749	0.000301297
NP_728841.2	RpL28	ribosomal protein L28, isoform G [Drosophila melanogaster]	22	144	0.991	0.999992	-0.013043	3.34168e-06
NP_524858.1	Pep	protein on ecdysone puffs, isoform B [Drosophila melanogaster]	22	716	1.004	1	0.00575927	3.02902e-08
NP_001246063.1	GCS2beta	glucosidase 2 beta subunit, isoform B [Drosophila melanogaster]	22	548	1.006	1	0.00863031	1.95246e-08
NP_648165.1	CG8042	CG8042 [Drosophila melanogaster]	21	656	2.71	0.000852177	1.43829	3.06947
NP_001261140.1	jbug	jitterbug, isoform N [Drosophila melanogaster]	21	2990	2.201	0.00274064	1.13816	2.56215
NP_477377.1	CG4882	CG4882, isoform A [Drosophila melanogaster]	21	406	0.455	0.00386079	-1.13606	2.41332
NP_787968.1	LeuRS	Leucyl-tRNA synthetase, isoform A [Drosophila melanogaster]	21	1182	3.38	0.0042073	1.75702	2.376
NP_523476.1	mRpL24	mitochondrial ribosomal protein L24 [Drosophila melanogaster]	21	247	0.534	0.00448395	-0.905088	2.34834
NP_001246678.1	CG43078	uncharacterized protein Dmel_CG43078, isoform H [Drosophila melanogaster]	21	2540	3.137	0.00707597	1.64939	2.15021
NP_610764.1	CG8839	CG8839, isoform A [Drosophila melanogaster]	21	529	1.726	0.00758119	0.787432	2.12026
NP_001033870.1	capt	capulet, isoform B [Drosophila melanogaster]	21	783	2.234	0.00788991	1.15963	2.10293
NP_649069.2	CG3902	CG3902 [Drosophila melanogaster]	21	414	0.584	0.00823873	-0.77596	2.08414
NP_608978.2	Gal	beta galactosidase, isoform A [Drosophila melanogaster]	21	672	2.669	0.00971987	1.4163	2.01234
NP_996002.2	CG18769	uncharacterized protein Dmel_CG18769, isoform G [Drosophila melanogaster]	21	443	1.875	0.0119971	0.906891	1.92092
NP_727353.1	LysRS	Lysyl-tRNA synthetase, isoform B [Drosophila melanogaster]	21	607	1.379	0.0180174	0.463622	1.74431
NP_726121.3	CG13492	uncharacterized protein Dmel_CG13492 [Drosophila melanogaster]	21	2979	0.43	0.018266	-1.21759	1.73836
NP_611095.1	clu	clueless, isoform A [Drosophila melanogaster]	21	1448	0.469	0.025504	-1.09234	1.59339
NP_524614.2	mod	modulo, isoform A [Drosophila melanogaster]	21	542	0.615	0.0516059	-0.701342	1.2873
NP_001285513.1	CG34120	uncharacterized protein Dmel_CG34120, isoform E [Drosophila melanogaster]	21	1998	1.617	0.0737912	0.69332	1.132
NP_649835.1	Tcp-1eta	Tcp-1eta [Drosophila melanogaster]	21	544	1.766	0.0860335	0.820485	1.06533
NP_610156.1	CG3107	CG3107, isoform A [Drosophila melanogaster]	21	1034	0.691	0.0929084	-0.533242	1.03194
NP_001260427.1	Tor	target of rapamycin, isoform B [Drosophila melanogaster]	21	2471	1.558	0.108265	0.639695	0.965512
NP_001245946.1	Glt	glutactin, isoform D [Drosophila melanogaster]	21	1026	1.264	0.127283	0.337996	0.89523
NP_001285757.1	CG13096	uncharacterized protein Dmel_CG13096, isoform B [Drosophila melanogaster]	21	681	0.604	0.138246	-0.72738	0.859347
NP_476779.1	Uro	urate oxidase [Drosophila melanogaster]	21	352	0.719	0.139973	-0.475936	0.853956
NP_649757.1	CG2767	CG2767 [Drosophila melanogaster]	21	329	1.186	0.168303	0.246104	0.773908
NP_524182.3	Ide	insulin degrading metalloproteinase [Drosophila melanogaster]	21	990	1.189	0.205737	0.249749	0.686688
NP_651838.1	l(3)03670	lethal (3) 03670 [Drosophila melanogaster]	21	223	0.554	0.210715	-0.852042	0.676305
NP_724350.1	Df31	decondensation factor 31, isoform B [Drosophila melanogaster]	21	183	0.407	0.223302	-1.2969	0.651107
NP_001261775.1	tral	trailer hitch, isoform H [Drosophila melanogaster]	21	657	0.522	0.316063	-0.937878	0.500227
NP_648040.1	CG10226	uncharacterized protein Dmel_CG10226, isoform A [Drosophila melanogaster]	21	1320	1.324	0.362537	0.404903	0.440647
NP_727320.1	su(r)	suppressor of rudimentary [Drosophila melanogaster]	21	1031	1.141	0.371897	0.190299	0.429577
NP_649916.1	P58IPK	P58IPK [Drosophila melanogaster]	21	498	0.633	0.396989	-0.659723	0.401222
NP_649765.1	CG7910	CG7910, isoform A [Drosophila melanogaster]	21	530	1.342	0.504995	0.424385	0.296713
NP_995838.1	CG7639	CG7639 [Drosophila melanogaster]	21	443	0.808	0.545013	-0.307573	0.263593
NP_610075.2	Mtp	microsomal triacylglycerol transfer protein [Drosophila melanogaster]	21	886	1.342	0.589978	0.424385	0.229164
NP_524211.1	RpLP0	ribosomal protein LP0, isoform A [Drosophila melanogaster]	21	317	0.851	0.704753	-0.232769	0.151963
NP_611460.1	CG11208	uncharacterized protein Dmel_CG11208 [Drosophila melanogaster]	21	568	0.815	0.710436	-0.295128	0.148475
NP_608354.1	Pmp70	peroxisomal membrane protein 70 kDa, isoform A [Drosophila melanogaster]	21	665	0.76	0.779889	-0.395929	0.107967
NP_476632.1	RpS3	ribosomal protein S3, isoform A [Drosophila melanogaster]	21	246	1.315	0.87589	0.395063	0.0575506
NP_001260191.1	CG5177	CG5177, isoform B [Drosophila melanogaster]	21	276	1.392	0.906078	0.477159	0.0428344
NP_001285794.1	RpL7	ribosomal protein L7, isoform B [Drosophila melanogaster]	21	252	0.92	0.947199	-0.120294	0.0235586
NP_001188684.1	CG3609	CG3609, isoform B [Drosophila melanogaster]	21	335	0.969	0.997901	-0.0454314	0.000912399
NP_572836.1	CG32649	uncharacterized protein Dmel_CG32649 [Drosophila melanogaster]	21	661	0.997	0.999999	-0.00433459	3.07482e-07
NP_001015389.1	Scp1	sarcoplasmic calcium-binding protein 1, isoform A [Drosophila melanogaster]	21	189	0.999	1	-0.00144342	0
NP_611341.1	CG10924	uncharacterized protein Dmel_CG10924, isoform A [Drosophila melanogaster]	20	638	3.235	7.06637e-05	1.69377	4.1508
NP_608578.1	CG5080	CG5080, isoform B [Drosophila melanogaster]	20	554	2.046	0.000757867	1.03281	3.12041
NP_001246637.1	Cyt-c1	cytochrome c1, isoform B [Drosophila melanogaster]	20	307	0.227	0.000918929	-2.13924	3.03672
NP_723603.1	CG31872	uncharacterized protein Dmel_CG31872, isoform A [Drosophila melanogaster]	20	1073	3.493	0.000932786	1.80447	3.03022
NP_611468.1	CG9090	CG9090, isoform A [Drosophila melanogaster]	20	374	0.242	0.00163804	-2.04692	2.78568
NP_524474.1	Hsp68	heat shock protein 68 [Drosophila melanogaster]	20	635	9.026	0.00165184	3.17409	2.78203
NP_611382.1	MetRS	Methionyl-tRNA synthetase [Drosophila melanogaster]	20	1022	2.484	0.00507585	1.31267	2.29449
NP_609215.3	CG7627	CG7627, isoform A [Drosophila melanogaster]	20	1355	0.694	0.00516418	-0.526992	2.287
NP_523740.3	Mdr50	multi drug resistance 50 [Drosophila melanogaster]	20	1313	0.512	0.00665872	-0.965784	2.17661
NP_651416.1	CG5028	CG5028, isoform A [Drosophila melanogaster]	20	402	2.245	0.00757233	1.16672	2.12077
NP_651269.1	CG5789	CG5789, isoform A [Drosophila melanogaster]	20	1402	1.698	0.00922168	0.763836	2.03519
NP_650273.2	CG8773	CG8773 [Drosophila melanogaster]	20	994	0.277	0.0195699	-1.85204	1.70841
NP_609579.1	CG5525	CG5525 [Drosophila melanogaster]	20	533	1.787	0.0227503	0.83754	1.64301
NP_001189276.1	Syx1A	syntaxin 1A, isoform B [Drosophila melanogaster]	20	296	1.723	0.0233552	0.784923	1.63162
NP_001285925.1	CG15293	uncharacterized protein Dmel_CG15293, isoform C [Drosophila melanogaster]	20	333	2.23	0.0235687	1.15704	1.62766
NP_001285427.1	CG7556	CG7556, isoform B [Drosophila melanogaster]	20	522	1.74	0.0312166	0.799087	1.50561
NP_524449.1	Nrx-1	neurexin 1, isoform A [Drosophila melanogaster]	20	1837	1.834	0.0328557	0.874994	1.48339
NP_001246928.1	mtd	mustard, isoform V [Drosophila melanogaster]	20	1344	1.624	0.0465697	0.699552	1.3319
NP_730054.1	AGO2	argonaute 2, isoform C [Drosophila melanogaster]	20	1217	1.818	0.0676671	0.862352	1.16962
NP_523802.1	Acox57D-p	acyl-Coenzyme A oxidase at 57D proximal, isoform A [Drosophila melanogaster]	20	677	2.352	0.0743085	1.23389	1.12896
NP_001261867.1	GlyRS	Glycyl-tRNA synthetase, isoform C [Drosophila melanogaster]	20	765	1.468	0.086903	0.553852	1.06097
NP_725073.1	wal	walrus, isoform A [Drosophila melanogaster]	20	330	0.741	0.09303	-0.432455	1.03138
NP_572826.1	ade5	ade5, isoform A [Drosophila melanogaster]	20	429	2.009	0.104814	1.00648	0.97958
NP_609496.1	CG6287	CG6287 [Drosophila melanogaster]	20	332	1.262	0.105177	0.335712	0.978078
NP_651400.1	CG5112	CG5112 [Drosophila melanogaster]	20	523	1.37	0.111933	0.454176	0.951041
NP_511152.2	mRpL38	mitochondrial ribosomal protein L38 [Drosophila melanogaster]	20	416	0.528	0.143421	-0.92139	0.843387
NP_611140.3	CG8306	CG8306 [Drosophila melanogaster]	20	516	1.381	0.149609	0.465713	0.825043
NP_729246.2	pst	pastrel, isoform F [Drosophila melanogaster]	20	707	0.75	0.186941	-0.415037	0.728294
NP_729118.1	Rcc1	regulator of chromosome condensation 1, isoform B [Drosophila melanogaster]	20	547	0.522	0.188424	-0.937878	0.724863
NP_001015319.1	eIF-4B	eukaryotic initiation factor 4B, isoform B [Drosophila melanogaster]	20	459	1.455	0.256306	0.541019	0.591242
NP_651963.1	Sucb	sucb, isoform A [Drosophila melanogaster]	20	416	1.553	0.293589	0.635058	0.53226
NP_649517.1	CG2604	CG2604, isoform A [Drosophila melanogaster]	20	430	0.866	0.508043	-0.207561	0.294099
NP_524450.2	T-cp1	Tcp1-like, isoform A [Drosophila melanogaster]	20	557	1.401	0.52547	0.486457	0.279452
NP_650843.1	CG4538	CG4538, isoform A [Drosophila melanogaster]	20	673	1.166	0.538997	0.221568	0.268413
NP_609694.1	Cyp28a5	Cyp28a5 [Drosophila melanogaster]	20	505	0.88	0.726448	-0.184425	0.138796
NP_611563.1	CG4302	CG4302 [Drosophila melanogaster]	20	532	0.817	0.770766	-0.291592	0.113078
NP_611548.1	CG9394	CG9394, isoform A [Drosophila melanogaster]	20	679	1.053	0.981508	0.0745054	0.00810612
NP_727094.1	RpL7A	ribosomal protein L7A, isoform A [Drosophila melanogaster]	20	271	1.038	0.999394	0.0538064	0.000263264
489201354		MULTISPECIES: lysyl endopeptidase [Pseudomonas]	20	462	0.952	0.999946	-0.0709665	2.33606e-05
NP_001286613.1	CalpA	Calpain-A, isoform D [Drosophila melanogaster]	19	843	2.039	0.000591329	1.02786	3.22817
NP_524174.1	fln	flightin, isoform A [Drosophila melanogaster]	19	182	4.156	0.000944783	2.0552	3.02467
NP_732553.2	CG31195	uncharacterized protein Dmel_CG31195 [Drosophila melanogaster]	19	807	2.413	0.00156383	1.27083	2.80581
NP_649685.1	CG1979	CG1979 [Drosophila melanogaster]	19	1047	3.649	0.00219107	1.8675	2.65934
NP_001247269.1	CG34355	uncharacterized protein Dmel_CG34355, isoform E [Drosophila melanogaster]	19	755	3.072	0.00283602	1.61918	2.54729
NP_650274.2	CG8774	CG8774, isoform A [Drosophila melanogaster]	19	942	0.284	0.0028763	-1.81604	2.54117
NP_001260561.1	AsnRS	Asparaginyl-tRNA synthetase, isoform B [Drosophila melanogaster]	19	558	2.42	0.00318561	1.27501	2.49681
NP_730790.2	Gel	gelsolin, isoform D [Drosophila melanogaster]	19	798	1.981	0.0039056	0.986229	2.40831
NP_001287175.1	Hcs	holocarboxylase synthetase, isoform C [Drosophila melanogaster]	19	1047	3.517	0.00425823	1.81435	2.37077
NP_001263058.1	Rpn2	regulatory particle non-ATPase 2, isoform C [Drosophila melanogaster]	19	1020	2.607	0.00433538	1.38239	2.36297
NP_727251.1	Trxr-1	thioredoxin reductase-1, isoform B [Drosophila melanogaster]	19	596	0.803	0.0052434	-0.316528	2.28039
NP_610443.1	PPO2	prophenoloxidase 2 [Drosophila melanogaster]	19	684	1.95	0.00568657	0.963474	2.24515
NP_476602.1	Gli	gliotactin, isoform A [Drosophila melanogaster]	19	956	2.85	0.00738225	1.51096	2.13181
NP_476667.1	pAbp	poly(A) binding protein, isoform A [Drosophila melanogaster]	19	634	2.114	0.00763177	1.07998	2.11737
NP_001096916.1	rdgA	retinal degeneration A, isoform B [Drosophila melanogaster]	19	1027	3.098	0.0085655	1.63134	2.06725
NP_001262624.1	gish	gilgamesh, isoform L [Drosophila melanogaster]	19	537	1.752	0.0102251	0.809003	1.99033
NP_001163112.1	whd	withered, isoform D [Drosophila melanogaster]	19	782	1.528	0.0132363	0.611645	1.87823
NP_729086.1	DnaJ-1	DnaJ-like-1, isoform B [Drosophila melanogaster]	19	334	2.279	0.0134151	1.1884	1.87241
NP_648642.1	flr	flare, isoform A [Drosophila melanogaster]	19	608	1.516	0.0138238	0.60027	1.85937
NP_523503.2	ninaC	neither inactivation nor afterpotential C, isoform B [Drosophila melanogaster]	19	1501	3.103	0.0141642	1.63366	1.84881
NP_477008.1	Trp1	translocation protein 1, isoform A [Drosophila melanogaster]	19	415	2.07	0.0150609	1.04963	1.82215
NP_723966.1	Idgf3	imaginal disc growth factor 3, isoform B [Drosophila melanogaster]	19	441	4.053	0.0178596	2.01899	1.74813
NP_524675.1	Pgm	phosphoglucose mutase [Drosophila melanogaster]	19	560	1.316	0.0224012	0.396159	1.64973
NP_511073.1	RpS6	ribosomal protein S6, isoform B [Drosophila melanogaster]	19	248	1.397	0.0368634	0.482332	1.4334
NP_477159.1	Hmu	hemomucin [Drosophila melanogaster]	19	579	1.369	0.0427246	0.453122	1.36932
NP_524105.2	Pdh	photoreceptor dehydrogenase, isoform A [Drosophila melanogaster]	19	278	1.543	0.046884	0.625738	1.32898
NP_524464.1	Rpt5	regulatory particle triple-A ATPase 5 [Drosophila melanogaster]	19	428	1.749	0.0525387	0.80653	1.27952
NP_572707.4	GCS1	glucosidase 1, isoform B [Drosophila melanogaster]	19	849	1.242	0.100522	0.312665	0.997738
NP_651621.2	CG12413	uncharacterized protein Dmel_CG12413 [Drosophila melanogaster]	19	696	0.63	0.107814	-0.666576	0.967326
NP_610467.1	Rme-8	receptor mediated endocytosis 8, isoform A [Drosophila melanogaster]	19	2408	1.416	0.128011	0.501821	0.892753
NP_001260335.1	CG33303	uncharacterized protein Dmel_CG33303, isoform B [Drosophila melanogaster]	19	458	1.241	0.177555	0.311503	0.750666
NP_651000.1	CG6439	CG6439, isoform A [Drosophila melanogaster]	19	370	1.374	0.184331	0.458382	0.734401
NP_609150.2	LKRSDH	lysine ketoglutarate reductase/saccharopine dehydrogenase, isoform A [Drosophila melanogaster]	19	928	1.364	0.275571	0.447844	0.559767
NP_001285439.1	NAA15-16	N(alpha)-acetyltransferase 15/16, isoform B [Drosophila melanogaster]	19	890	1.573	0.323244	0.653519	0.490469
NP_001284987.1	CG10932	uncharacterized protein Dmel_CG10932, isoform B [Drosophila melanogaster]	19	410	0.79	0.462416	-0.340075	0.334967
NP_609394.1	Mdh1	malate dehydrogenase 1, isoform A [Drosophila melanogaster]	19	337	1.436	0.529052	0.522056	0.276501
NP_788655.1	mfas	midline fasciclin, isoform J [Drosophila melanogaster]	19	905	1.131	0.726628	0.177599	0.138688
NP_523997.1	Hsp26	heat shock protein 26, isoform A [Drosophila melanogaster]	19	208	1.132	0.930122	0.178874	0.0314603
NP_726543.1	CG2316	CG2316, isoform C [Drosophila melanogaster]	19	730	1.145	0.959917	0.195348	0.0177664
NP_652724.1	CG3267	CG3267 [Drosophila melanogaster]	19	578	0.944	0.972238	-0.0831412	0.0122275
NP_610382.2	Mal-A5	maltase A5, isoform A [Drosophila melanogaster]	19	630	0.911	0.981425	-0.134477	0.00814286
NP_608525.1	shv	shriveled [Drosophila melanogaster]	19	354	1.115	0.989231	0.157044	0.00470239
NP_523663.1	Pgi	phosphoglucose isomerase, isoform A [Drosophila melanogaster]	19	558	0.923	0.997939	-0.115597	0.000895956
NP_620470.1	26-29-p	26-29kD-proteinase [Drosophila melanogaster]	19	549	1.034	0.998304	0.0482362	0.00073711
NP_001285979.1	CaBP1	calcium-binding protein 1, isoform B [Drosophila melanogaster]	19	433	1.031	0.999972	0.0440443	1.20434e-05
NP_523817.1	Fib	fibrillarin [Drosophila melanogaster]	19	344	0.993	0.999998	-0.0101344	8.93931e-07
NP_001263106.1	Fer2LCH	ferritin 2 light chain homologue, isoform E [Drosophila melanogaster]	19	236	0.999	1	-0.00144342	2.41238e-10
NP_733183.1	CG31075	uncharacterized protein Dmel_CG31075, isoform A [Drosophila melanogaster]	18	485	4.272	4.04712e-05	2.09491	4.39285
NP_611133.1	CG7813	CG7813 [Drosophila melanogaster]	18	734	7.094	0.000257184	2.8266	3.58976
NP_523378.2	if	inflated, isoform B [Drosophila melanogaster]	18	1396	2.422	0.000303413	1.2762	3.51797
NP_722774.1	papi	papi, isoform B [Drosophila melanogaster]	18	576	2.016	0.000405185	1.0115	3.39235
NP_001189251.1	CG42668	uncharacterized protein Dmel_CG42668, isoform K [Drosophila melanogaster]	18	956	1.768	0.000599226	0.822118	3.22241
NP_610854.1	CG4679	CG4679 [Drosophila melanogaster]	18	652	0.271	0.000688301	-1.88364	3.16222
NP_573303.1	Ggt-1	gamma-glutamyl transpeptidase, isoform A [Drosophila melanogaster]	18	579	0.512	0.000948114	-0.965784	3.02314
NP_524719.1	ND-23	NADH dehydrogenase (ubiquinone) 23 kDa subunit [Drosophila melanogaster]	18	217	0.173	0.0014968	-2.53116	2.82484
NP_001036485.1	Dscam1	down syndrome cell adhesion molecule 1, isoform BB [Drosophila melanogaster]	18	2020	2.366	0.00152896	1.24245	2.8156
NP_724288.3	vari	varicose, isoform B [Drosophila melanogaster]	18	636	2.536	0.00155719	1.34255	2.80766
NP_524284.1	mRpL19	mitochondrial ribosomal protein L19 [Drosophila melanogaster]	18	306	0.513	0.00168444	-0.962969	2.77354
NP_730196.1	Nrt	neurotactin, isoform A [Drosophila melanogaster]	18	846	3.417	0.0021776	1.77273	2.66202
NP_651408.1	Ssadh	succinic semialdehyde dehydrogenase, isoform A [Drosophila melanogaster]	18	509	0.566	0.00346781	-0.821126	2.45994
NP_572756.3	ATP7	ATP7, isoform B [Drosophila melanogaster]	18	1254	1.734	0.00358005	0.794104	2.44611
NP_524048.2	Ptp69D	protein tyrosine phosphatase 69D, isoform A [Drosophila melanogaster]	18	1462	1.791	0.00431143	0.840765	2.36538
NP_723479.1	Pka-C1	protein kinase, cAMP-dependent, catalytic subunit 1, isoform B [Drosophila melanogaster]	18	353	2.104	0.00479923	1.07313	2.31883
NP_001259946.1	Drp1	dynamin related protein 1, isoform B [Drosophila melanogaster]	18	735	2.282	0.00618727	1.1903	2.2085
NP_523400.1	betaCOP	coat protein (coatomer) beta [Drosophila melanogaster]	18	964	2.048	0.00669316	1.03422	2.17437
NP_524061.1	DCTN1-p150	dynactin 1, p150 subunit [Drosophila melanogaster]	18	1265	2.119	0.00736065	1.08338	2.13308
NP_647779.2	CG14964	uncharacterized protein Dmel_CG14964 [Drosophila melanogaster]	18	1443	4.685	0.0105494	2.22805	1.97677
NP_001259136.1	CG32809	uncharacterized protein Dmel_CG32809, isoform I [Drosophila melanogaster]	18	1249	2.356	0.0115109	1.23634	1.93889
NP_723806.1	CG31729	uncharacterized protein Dmel_CG31729, isoform A [Drosophila melanogaster]	18	1087	1.299	0.0129069	0.377401	1.88918
NP_001259597.1	CG42354	uncharacterized protein Dmel_CG42354, isoform F [Drosophila melanogaster]	18	503	3.602	0.017295	1.8488	1.76208
NP_609105.1	ico	iconoclast [Drosophila melanogaster]	18	745	0.6	0.0222865	-0.736966	1.65196
NP_609253.1	LManVI	lysosomal alpha-mannosidase VI [Drosophila melanogaster]	18	1007	0.366	0.0260366	-1.45008	1.58442
NP_647683.1	SCOT	Succinyl-CoA:3-ketoacid CoA transferase, isoform A [Drosophila melanogaster]	18	516	0.57	0.0480812	-0.810966	1.31802
NP_001285330.1	Rbp2	RNA-binding protein 2, isoform D [Drosophila melanogaster]	18	388	2.272	0.0503615	1.18396	1.2979
NP_001285121.1	Gs2	glutamine synthetase 2, isoform D [Drosophila melanogaster]	18	373	1.561	0.0580616	0.642471	1.23611
NP_648451.1	Plod	procollagen lysyl hydroxylase, isoform A [Drosophila melanogaster]	18	721	2.19	0.0773952	1.13093	1.11129
NP_001260795.1	lig	lingerer, isoform K [Drosophila melanogaster]	18	1417	2.121	0.0891584	1.08474	1.04984
NP_524816.1	Lsp2	larval serum protein 2, isoform A [Drosophila melanogaster]	18	701	2.326	0.118235	1.21785	0.927255
NP_788764.1	Tpi	triose phosphate isomerase, isoform A [Drosophila melanogaster]	18	348	0.593	0.121488	-0.753896	0.915466
NP_001246757.1	Mpcp	mitochondrial phosphate carrier protein, isoform C [Drosophila melanogaster]	18	356	0.623	0.145375	-0.682696	0.837511
NP_729078.1	Msr-110	Msr-110, isoform C [Drosophila melanogaster]	18	625	1.513	0.173179	0.597412	0.761505
NP_651703.1	CG1907	CG1907 [Drosophila melanogaster]	18	317	0.691	0.208838	-0.533242	0.68019
NP_723992.1	VhaSFD	vacuolar H[+]-ATPase SFD subunit, isoform B [Drosophila melanogaster]	18	542	0.48	0.29436	-1.05889	0.531121
NP_524370.2	blp	black pearl, isoform A [Drosophila melanogaster]	18	141	0.622	0.350018	-0.685014	0.45591
NP_477392.1	scf	supercoiling factor, isoform A [Drosophila melanogaster]	18	329	2.102	0.362276	1.07176	0.44096
NP_001260350.1	LManI	lysosomal alpha-mannosidase I, isoform B [Drosophila melanogaster]	18	950	0.765	0.428008	-0.386468	0.368548
NP_724679.2	Mal-A6	maltase A6, isoform D [Drosophila melanogaster]	18	601	1.872	0.575989	0.90458	0.239586
NP_001285801.1	nmd	no mitochondrial derivative, isoform C [Drosophila melanogaster]	18	369	1.116	0.638339	0.158337	0.194949
NP_650503.1	Hmt-1	heavy metal tolerance factor 1 [Drosophila melanogaster]	18	866	1.109	0.647097	0.149259	0.18903
NP_610603.2	CG12338	uncharacterized protein Dmel_CG12338, isoform A [Drosophila melanogaster]	18	335	1.262	0.704385	0.335712	0.15219
NP_651274.1	atl	atlastin, isoform A [Drosophila melanogaster]	18	541	1.201	0.706278	0.264236	0.151024
NP_001138060.1	CG42232	uncharacterized protein Dmel_CG42232 [Drosophila melanogaster]	18	3441	0.788	0.79349	-0.343732	0.100459
NP_788676.1	Nsf2	N-ethylmaleimide-sensitive factor 2, isoform A [Drosophila melanogaster]	18	752	1.186	0.884313	0.246104	0.0533942
NP_476570.1	Gs1	glutamine synthetase 1, isoform B [Drosophila melanogaster]	18	399	1.138	0.907135	0.186501	0.0423282
NP_648357.1	CG8177	CG8177, isoform A [Drosophila melanogaster]	18	1268	1.119	0.922211	0.16221	0.0351697
NP_523975.1	RpL14	ribosomal protein L14 [Drosophila melanogaster]	18	166	0.92	0.953958	-0.120294	0.0204706
NP_523905.2	Scsalpha	succinyl coenzyme A synthetase alpha subunit, isoform A [Drosophila melanogaster]	18	328	1.12	0.964083	0.163499	0.0158856
NP_476631.1	RpL19	ribosomal protein L19, isoform A [Drosophila melanogaster]	18	203	1.085	0.981633	0.117695	0.00805083
NP_733356.2	RpS7	ribosomal protein S7, isoform E [Drosophila melanogaster]	18	194	1.123	0.991637	0.167358	0.00364732
NP_610310.2	CG2064	CG2064 [Drosophila melanogaster]	18	330	0.93	0.993861	-0.104697	0.00267439
NP_611685.1	RpS16	ribosomal protein S16, isoform A [Drosophila melanogaster]	18	148	1.081	0.996499	0.112367	0.00152327
NP_524726.1	RpL8	ribosomal protein L8, isoform A [Drosophila melanogaster]	18	256	1.056	0.999333	0.0786098	0.000289614
NP_001027180.1	fabp	fatty acid binding protein, isoform B [Drosophila melanogaster]	18	130	1.03	0.999746	0.0426443	0.000110494
NP_722715.1	RFeSP	rieske iron-sulfur protein, isoform B [Drosophila melanogaster]	17	230	0.264	0.000126931	-1.92139	3.89643
NP_523671.1	Pka-R2	protein kinase, cAMP-dependent, regulatory subunit type 2, isoform A [Drosophila melanogaster]	17	377	2.401	0.000444944	1.26364	3.35169
NP_610805.1	CG8778	CG8778 [Drosophila melanogaster]	17	299	0.593	0.000523443	-0.753896	3.28113
NP_001260426.1	Vha68-1	vacuolar H[+] ATPase 68kD subunit 1, isoform B [Drosophila melanogaster]	17	614	2.486	0.000657171	1.31383	3.18232
NP_524306.3	mRpL37	mitochondrial ribosomal protein L37 [Drosophila melanogaster]	17	408	0.514	0.00115363	-0.96016	2.93793
NP_727629.2	Tomosyn	tomosyn, isoform C [Drosophila melanogaster]	17	1470	2.774	0.00121658	1.47197	2.91486
NP_523861.1	uzip	unzipped, isoform A [Drosophila melanogaster]	17	488	2.119	0.00125595	1.08338	2.90103
NP_001246890.1	nrm	neuromusculin, isoform E [Drosophila melanogaster]	17	2192	2.287	0.00174521	1.19346	2.75815
NP_733237.1	mino	minotaur, isoform C [Drosophila melanogaster]	17	786	0.687	0.00264501	-0.541618	2.57757
NP_651003.1	Cchl	cytochrome c heme lyase, isoform A [Drosophila melanogaster]	17	281	2.121	0.00354774	1.08474	2.45005
NP_524063.1	Hsc70-1	heat shock protein cognate 1, isoform A [Drosophila melanogaster]	17	641	2.818	0.00362417	1.49467	2.44079
NP_727519.1	dlg1	discs large 1, isoform F [Drosophila melanogaster]	17	816	4.151	0.00426621	2.05346	2.36996
NP_001260155.1	Liprin-alpha	Liprin-alpha, isoform E [Drosophila melanogaster]	17	1214	2.399	0.00473556	1.26243	2.32463
NP_001261457.1	CG33523	uncharacterized protein Dmel_CG33523, isoform F [Drosophila melanogaster]	17	654	1.687	0.00511246	0.75446	2.29137
NP_648836.2	ATPsynbetaL	ATP synthase, beta subunit-like [Drosophila melanogaster]	17	622	4.279	0.00564417	2.09727	2.2484
NP_726788.1	CG4199	CG4199, isoform C [Drosophila melanogaster]	17	593	1.878	0.00872527	0.909197	2.05922
NP_609032.1	mmy	mummy, isoform A [Drosophila melanogaster]	17	520	2.984	0.0100638	1.57725	1.99724
NP_523803.1	Acox57D-d	acyl-Coenzyme A oxidase at 57D distal [Drosophila melanogaster]	17	677	0.351	0.0117919	-1.51046	1.92842
NP_650898.1	Srp72	signal recognition particle protein 72 [Drosophila melanogaster]	17	650	1.589	0.0140282	0.668119	1.853
NP_001247372.1	tmod	tropomodulin, isoform N [Drosophila melanogaster]	17	567	1.749	0.0146965	0.80653	1.83278
NP_477395.1	alphaCOP	coat protein (coatomer) alpha, isoform A [Drosophila melanogaster]	17	1234	1.875	0.015434	0.906891	1.81152
NP_728074.1	Fim	fimbrin, isoform D [Drosophila melanogaster]	17	641	0.441	0.016401	-1.18115	1.78513
NP_573131.1	Cnx14D	calnexin 14D [Drosophila melanogaster]	17	639	4.765	0.0177101	2.25248	1.75178
NP_788023.1	CG33129	uncharacterized protein Dmel_CG33129, isoform E [Drosophila melanogaster]	17	677	0.648	0.0224254	-0.625934	1.64926
NP_728267.1	Tao	Tao, isoform D [Drosophila melanogaster]	17	1039	1.851	0.0277502	0.888305	1.55673
NP_996375.1	sdt	stardust, isoform D [Drosophila melanogaster]	17	879	1.677	0.0522006	0.745883	1.28232
NP_524546.2	Pglym78	phosphoglyceromutase, isoform A [Drosophila melanogaster]	17	255	0.657	0.0541438	-0.606035	1.26645
NP_001097498.1	ens	ensconsin, isoform F [Drosophila melanogaster]	17	1241	1.997	0.0596852	0.997834	1.22413
NP_651027.1	CG7071	CG7071, isoform A [Drosophila melanogaster]	17	302	1.369	0.066851	0.453122	1.17489
NP_726441.1	Slik	Sterile20-like kinase, isoform B [Drosophila melanogaster]	17	1703	1.554	0.0696986	0.635987	1.15678
NP_001285124.1	Spase25	spase 25-subunit, isoform B [Drosophila melanogaster]	17	199	0.671	0.107739	-0.575615	0.967627
NP_476778.1	RpS27A	ribosomal protein S27A [Drosophila melanogaster]	17	156	1.333	0.122271	0.414677	0.912676
NP_649989.1	CG3999	CG3999, isoform A [Drosophila melanogaster]	17	985	1.471	0.135506	0.556797	0.868042
NP_001246198.1	CG14762	uncharacterized protein Dmel_CG14762, isoform B [Drosophila melanogaster]	17	498	1.682	0.148123	0.750178	0.829378
NP_610383.1	Mal-A7	maltase A7, isoform A [Drosophila melanogaster]	17	599	2.353	0.233675	1.2345	0.631389
NP_001260163.1	nrv1	nervana 1, isoform B [Drosophila melanogaster]	17	309	0.901	0.294679	-0.150401	0.530651
NP_727992.1	RpS19a	ribosomal protein S19a, isoform B [Drosophila melanogaster]	17	156	1.349	0.349442	0.43189	0.456625
NP_608924.1	CG12512	uncharacterized protein Dmel_CG12512 [Drosophila melanogaster]	17	593	1.347	0.383928	0.42975	0.415751
NP_651038.3	CG13850	uncharacterized protein Dmel_CG13850, isoform A [Drosophila melanogaster]	17	564	0.713	0.424532	-0.488026	0.372089
NP_523367.2	nonA	no on or off transient A, isoform A [Drosophila melanogaster]	17	700	1.56	0.425495	0.641546	0.371105
NP_647946.1	CG10672	uncharacterized protein Dmel_CG10672 [Drosophila melanogaster]	17	317	0.792	0.504506	-0.336428	0.297133
NP_477271.1	Osbp	oxysterol binding protein [Drosophila melanogaster]	17	784	1.318	0.652439	0.39835	0.18546
NP_730823.2	CG11739	uncharacterized protein Dmel_CG11739, isoform C [Drosophila melanogaster]	17	321	0.901	0.902328	-0.150401	0.0446358
NP_476964.1	RpS18	ribosomal protein S18, isoform A [Drosophila melanogaster]	17	152	1.294	0.96932	0.371838	0.0135327
NP_001036391.2	RpL5	ribosomal protein L5, isoform H [Drosophila melanogaster]	17	299	0.93	0.976679	-0.104697	0.0102483
NP_649253.1	Pex14	peroxin 14 [Drosophila melanogaster]	17	280	1.049	0.989668	0.0690147	0.00451061
NP_001260557.1	Rpn3	regulatory particle non-ATPase 3, isoform B [Drosophila melanogaster]	17	494	1.054	0.998539	0.0758749	0.000634771
NP_724828.1	hebe	hebe, isoform B [Drosophila melanogaster]	17	456	0.928	0.999351	-0.107803	0.000282142
NP_610523.2	CG1665	CG1665 [Drosophila melanogaster]	17	340	0.989	0.999989	-0.0159576	4.92126e-06
NP_725843.1	tn	thin, isoform B [Drosophila melanogaster]	16	1353	6.567	1.73732e-05	2.71523	4.76012
NP_476609.1	AspRS	Aspartyl-tRNA synthetase, isoform A [Drosophila melanogaster]	16	531	3.16	6.58074e-05	1.65992	4.18173
NP_524049.1	Klc	kinesin light chain, isoform A [Drosophila melanogaster]	16	508	2.319	0.000299878	1.2135	3.52306
NP_001260612.1	COX4	cytochrome c oxidase subunit 4, isoform C [Drosophila melanogaster]	16	182	0.165	0.000966151	-2.59946	3.01496
NP_730611.1	AcCoAS	acetyl coenzyme A synthase, isoform A [Drosophila melanogaster]	16	670	2.189	0.000981007	1.13027	3.00833
NP_572484.1	Cp7Fb	chorion protein b at 7F, isoform A [Drosophila melanogaster]	16	500	0.099	0.00126488	-3.33643	2.89795
NP_611002.3	Cyp6a20	Cyp6a20 [Drosophila melanogaster]	16	501	0.553	0.00336465	-0.854649	2.47306
NP_611143.1	CG5065	CG5065, isoform A [Drosophila melanogaster]	16	625	2.364	0.00369263	1.24123	2.43266
NP_001246814.1	Cad74A	cadherin 74A, isoform C [Drosophila melanogaster]	16	1820	0.559	0.00687097	-0.83908	2.16298
NP_001189227.1	Rbp	RIM-binding protein, isoform F [Drosophila melanogaster]	16	1844	2.435	0.00699737	1.28392	2.15506
NP_647836.2	Sc2	Sc2 [Drosophila melanogaster]	16	302	1.346	0.00727505	0.428678	2.13816
NP_524000.1	Hsp27	heat shock protein 27, isoform A [Drosophila melanogaster]	16	213	3.103	0.00742344	1.63366	2.12939
NP_648167.1	CG8209	CG8209 [Drosophila melanogaster]	16	331	1.897	0.00840231	0.92372	2.0756
NP_524364.2	FK506-bp1	FK506-binding protein 1 [Drosophila melanogaster]	16	357	0.394	0.00882963	-1.34373	2.05406
NP_511096.2	Ost48	oligosaccharyltransferase 48kD subunit [Drosophila melanogaster]	16	449	1.327	0.0106841	0.408168	1.97126
NP_001262220.1	SPoCk	secretory pathway calcium atpase, isoform G [Drosophila melanogaster]	16	1062	1.666	0.0139473	0.736388	1.85551
NP_001259191.1	PI4KIIIalpha	phosphatidylinositol 4-kinase III alpha, isoform D [Drosophila melanogaster]	16	2154	1.486	0.0147013	0.571434	1.83264
NP_001285798.1	Prosalpha6	proteasome alpha6 subunit, isoform B [Drosophila melanogaster]	16	279	1.456	0.0151737	0.54201	1.81891
NP_609533.1	CG12264	uncharacterized protein Dmel_CG12264 [Drosophila melanogaster]	16	462	0.731	0.0167394	-0.452057	1.77626
NP_608822.1	bdl	borderless [Drosophila melanogaster]	16	719	1.516	0.0170761	0.60027	1.76761
NP_001286964.1	Dscam2	down syndrome cell adhesion molecule 2, isoform Q [Drosophila melanogaster]	16	1968	2.395	0.0201856	1.26003	1.69496
NP_525073.1	mRpL30	mitochondrial ribosomal protein L30 [Drosophila melanogaster]	16	180	0.455	0.0240387	-1.13606	1.61909
NP_609429.1	CG17097	uncharacterized protein Dmel_CG17097 [Drosophila melanogaster]	16	1087	1.861	0.0253586	0.896078	1.59587
NP_649018.2	TrpRS-m	Tryptophanyl-tRNA synthetase, mitochondrial, isoform A [Drosophila melanogaster]	16	665	1.451	0.0272447	0.537048	1.56472
NP_611836.2	CG5549	CG5549 [Drosophila melanogaster]	16	1188	2.351	0.0326853	1.23327	1.48565
NP_477147.2	yin	yin, isoform A [Drosophila melanogaster]	16	743	0.353	0.0424566	-1.50226	1.37205
NP_523720.2	Gbeta76C	G protein beta-subunit 76C [Drosophila melanogaster]	16	346	1.731	0.0538273	0.791606	1.269
NP_731654.2	CG12213	uncharacterized protein Dmel_CG12213, isoform E [Drosophila melanogaster]	16	525	1.468	0.0803078	0.553852	1.09524
NP_525081.1	Hexo2	hexosaminidase 2 [Drosophila melanogaster]	16	622	1.327	0.0956144	0.408168	1.01948
NP_733371.1	PH4alphaEFB	prolyl-4-hydroxylase-alpha EFB [Drosophila melanogaster]	16	550	2.017	0.104576	1.01221	0.980569
NP_652626.1	Ugt86Da	Ugt86Da [Drosophila melanogaster]	16	528	1.595	0.104976	0.673556	0.978911
NP_001188522.1	DAAM	dishevelled associated activator of morphogenesis, isoform D [Drosophila melanogaster]	16	1463	1.469	0.142564	0.554834	0.845989
NP_648111.1	Sec63	secretory 63 [Drosophila melanogaster]	16	753	1.193	0.17092	0.254594	0.767206
NP_610914.2	CG16935	uncharacterized protein Dmel_CG16935, isoform A [Drosophila melanogaster]	16	357	0.64	0.209508	-0.643856	0.678799
NP_523396.1	scu	scully, isoform A [Drosophila melanogaster]	16	255	0.799	0.218125	-0.323733	0.661294
NP_524841.1	GlnRS	Glutaminyl-tRNA synthetase [Drosophila melanogaster]	16	778	1.393	0.230342	0.478195	0.637627
NP_609378.1	CG4972	CG4972 [Drosophila melanogaster]	16	561	1.29	0.234658	0.367371	0.629564
NP_648408.1	CG11811	uncharacterized protein Dmel_CG11811 [Drosophila melanogaster]	16	233	0.849	0.309952	-0.236164	0.508706
NP_001260303.1	RpS2	ribosomal protein S2, isoform B [Drosophila melanogaster]	16	267	1.408	0.32296	0.493647	0.490852
NP_609845.1	CG5131	CG5131 [Drosophila melanogaster]	16	283	0.675	0.379086	-0.567041	0.421262
NP_001163065.1	l(2)01289	lethal (2) 01289, isoform F [Drosophila melanogaster]	16	1786	1.488	0.391434	0.573375	0.407341
NP_611006.1	ADPS	alkyldihydroxyacetonephosphate synthase, isoform A [Drosophila melanogaster]	16	631	1.177	0.415691	0.235114	0.381229
NP_726504.2	emp	epithelial membrane protein, isoform B [Drosophila melanogaster]	16	551	1.327	0.508023	0.408168	0.294117
NP_001027270.1	Adh	alcohol dehydrogenase, isoform E [Drosophila melanogaster]	16	256	0.669	0.550037	-0.579922	0.259608
NP_612087.1	Sac1	Sac1 phosphatase, isoform A [Drosophila melanogaster]	16	592	1.323	0.585501	0.403813	0.232472
NP_573114.2	CG9914	CG9914, isoform A [Drosophila melanogaster]	16	315	1.112	0.592791	0.153157	0.227098
NP_610886.2	Roe1	Roe1 [Drosophila melanogaster]	16	213	0.828	0.711478	-0.272297	0.147839
NP_001259998.1	CG17593	uncharacterized protein Dmel_CG17593, isoform B [Drosophila melanogaster]	16	476	1.247	0.76695	0.318461	0.115233
NP_650064.1	CG5214	CG5214 [Drosophila melanogaster]	16	468	0.821	0.775369	-0.284546	0.110491
NP_728963.1	CG14997	uncharacterized protein Dmel_CG14997, isoform B [Drosophila melanogaster]	16	457	0.941	0.782064	-0.0877334	0.106758
NP_524004.2	RpS9	ribosomal protein S9, isoform A [Drosophila melanogaster]	16	195	0.675	0.786025	-0.567041	0.104564
NP_524387.1	Prx3	peroxiredoxin 3 [Drosophila melanogaster]	16	234	0.828	0.82131	-0.272297	0.0854927
NP_610806.2	ZnT49B	zinc transporter 49B, isoform A [Drosophila melanogaster]	16	655	1.12	0.870957	0.163499	0.0600032
NP_732456.1	CG4572	CG4572, isoform A [Drosophila melanogaster]	16	482	1.157	0.871422	0.210389	0.0597716
NP_610945.1	CG8531	CG8531 [Drosophila melanogaster]	16	545	1.19	0.889771	0.250962	0.0507215
NP_728548.1	CG13887	uncharacterized protein Dmel_CG13887, isoform C [Drosophila melanogaster]	16	228	1.187	0.92338	0.24732	0.0346193
NP_727119.1	RpL17	ribosomal protein L17, isoform B [Drosophila melanogaster]	16	186	1.044	0.996429	0.0621217	0.00155352
NP_727445.1	Tango5	transport and golgi organization 5, isoform C [Drosophila melanogaster]	16	530	1.036	0.999383	0.051024	0.000268085
NP_573160.1	goe	gone early, isoform A [Drosophila melanogaster]	16	879	1.01	0.999997	0.0143553	1.17033e-06
NP_609241.1	CG13091	uncharacterized protein Dmel_CG13091, isoform A [Drosophila melanogaster]	15	523	9.531	7.73103e-05	3.25263	4.11176
NP_610947.3	CG8547	CG8547, isoform C [Drosophila melanogaster]	15	618	4.65	0.000119913	2.21723	3.92113
NP_476863.1	inaC	inactivation no afterpotential C [Drosophila melanogaster]	15	700	3.362	0.000146838	1.74932	3.83316
NP_001036692.1	ps	pasilla, isoform F [Drosophila melanogaster]	15	572	2.742	0.000269751	1.45523	3.56904
NP_001285102.1	CG2145	CG2145, isoform B [Drosophila melanogaster]	15	592	4.188	0.000295417	2.06626	3.52956
NP_610087.2	CG9257	CG9257 [Drosophila melanogaster]	15	347	2.218	0.000421778	1.14926	3.37492
NP_723549.1	Mulk	Multi-substrate lipid kinase [Drosophila melanogaster]	15	408	0.567	0.000494389	-0.818579	3.30593
NP_569875.2	CG3699	CG3699 [Drosophila melanogaster]	15	251	2.605	0.000695756	1.38128	3.15754
NP_649086.2	CG6812	CG6812 [Drosophila melanogaster]	15	327	3.058	0.00079011	1.61259	3.10231
NP_001259397.1	ATPsyndelta	ATP synthase, delta subunit, isoform B [Drosophila melanogaster]	15	157	0.28	0.00090644	-1.8365	3.04266
NP_001245414.1	CG1674	CG1674, isoform L [Drosophila melanogaster]	15	905	3.393	0.00218226	1.76256	2.66109
NP_001286014.1	dl	dorsal, isoform F [Drosophila melanogaster]	15	999	3.417	0.00259112	1.77273	2.58651
NP_649970.1	CG11722	uncharacterized protein Dmel_CG11722 [Drosophila melanogaster]	15	203	0.53	0.00331334	-0.915936	2.47973
NP_524836.2		coat protein (coatomer) beta' [Drosophila melanogaster]	15	914	1.949	0.00390236	0.962734	2.40867
NP_651072.1	mRpL45	mitochondrial ribosomal protein L45 [Drosophila melanogaster]	15	361	0.558	0.00503348	-0.841663	2.29813
NP_511166.2	mRpL3	mitochondrial ribosomal protein L3 [Drosophila melanogaster]	15	362	0.542	0.00524896	-0.883635	2.27993
NP_650447.1	Sra-1	specifically Rac1-associated protein 1 [Drosophila melanogaster]	15	1291	1.954	0.00559477	0.96643	2.25222
NP_477405.1	Inos	inos [Drosophila melanogaster]	15	565	0.676	0.00562234	-0.564905	2.25008
NP_723927.2	ND-B17	NADH dehydrogenase (ubiquinone) B17 subunit, isoform C [Drosophila melanogaster]	15	167	0.251	0.00580341	-1.99424	2.23632
NP_001259545.1	mud	mushroom body defect, isoform L [Drosophila melanogaster]	15	2501	4.896	0.00619284	2.2916	2.20811
NP_611410.1	EndoB	endophilin B, isoform A [Drosophila melanogaster]	15	390	1.834	0.00678774	0.874994	2.16827
NP_569901.1	fs(1)N	female sterile (1) nasrat [Drosophila melanogaster]	15	2118	0.379	0.00712514	-1.39973	2.14721
NP_996346.2	Vap33	VAMP-associated protein 33kDa, isoform E [Drosophila melanogaster]	15	269	1.552	0.0077829	0.634129	2.10886
NP_728869.1	PHGPx	PHGPx, isoform D [Drosophila melanogaster]	15	238	1.931	0.00812497	0.949348	2.09018
NP_610693.1	Tret1-1	trehalose transporter 1-1, isoform A [Drosophila melanogaster]	15	857	2.834	0.0124238	1.50284	1.90575
NP_609979.2	CG10132	uncharacterized protein Dmel_CG10132, isoform A [Drosophila melanogaster]	15	1361	2.27	0.013296	1.18269	1.87628
NP_001285889.1	ND-B22	NADH dehydrogenase (ubiquinone) B22 subunit, isoform B [Drosophila melanogaster]	15	144	0.161	0.0134318	-2.63487	1.87186
NP_651002.3	CG6028	CG6028 [Drosophila melanogaster]	15	293	0.847	0.0178003	-0.239566	1.74957
NP_649158.1	Rpn1	regulatory particle non-ATPase 1 [Drosophila melanogaster]	15	919	2.224	0.018703	1.15316	1.72809
NP_610174.1	CG11665	uncharacterized protein Dmel_CG11665, isoform A [Drosophila melanogaster]	15	658	1.687	0.02162	0.75446	1.66514
NP_524075.2	mRpL39	mitochondrial ribosomal protein L39 [Drosophila melanogaster]	15	333	0.604	0.0256438	-0.72738	1.59102
NP_477194.1	ATPsynCF6	ATP synthase, coupling factor 6, isoform A [Drosophila melanogaster]	15	106	0.131	0.0266181	-2.93236	1.57482
NP_001286894.1	CG13907	uncharacterized protein Dmel_CG13907, isoform B [Drosophila melanogaster]	15	816	2.291	0.0361068	1.19598	1.44241
NP_995616.1	colt	congested-like trachea, isoform D [Drosophila melanogaster]	15	306	0.705	0.0370267	-0.504305	1.43149
NP_523646.1	Cyp9b2	cytochrome P450-9b2 [Drosophila melanogaster]	15	505	0.458	0.044013	-1.12658	1.35642
NP_728930.1	Gad1	glutamic acid decarboxylase 1, isoform B [Drosophila melanogaster]	15	510	1.908	0.0521609	0.932061	1.28265
NP_610910.1	CG6543	CG6543, isoform A [Drosophila melanogaster]	15	295	0.512	0.0587604	-0.965784	1.23092
NP_001284845.1	CG2930	CG2930, isoform E [Drosophila melanogaster]	15	815	0.705	0.059517	-0.504305	1.22536
NP_573003.2	Cyp4s3	Cyp4s3 [Drosophila melanogaster]	15	495	2.005	0.0604831	1.0036	1.21837
NP_610254.1	CG30159	uncharacterized protein Dmel_CG30159, isoform A [Drosophila melanogaster]	15	239	0.482	0.0640289	-1.05289	1.19362
NP_001259982.1	SerRS	Seryl-tRNA synthetase, isoform B [Drosophila melanogaster]	15	501	1.369	0.0692834	0.453122	1.15937
NP_731967.2	GlyS	glycogen synthase, isoform A [Drosophila melanogaster]	15	709	2.177	0.0729508	1.12234	1.13697
NP_001286057.1	Faf2	Fas-associated factor, isoform B [Drosophila melanogaster]	15	464	1.596	0.0836665	0.674461	1.07745
NP_524185.1	mRpL15	mitochondrial ribosomal protein L15 [Drosophila melanogaster]	15	286	0.563	0.0851496	-0.828793	1.06982
NP_001036316.1	stnA	stoned A, isoform C [Drosophila melanogaster]	15	850	2.063	0.0994679	1.04474	1.00232
NP_523719.1	Iswi	imitation SWI, isoform A [Drosophila melanogaster]	15	1027	0.65	0.101807	-0.621488	0.992222
NP_610746.1	CG8858	CG8858 [Drosophila melanogaster]	15	1890	1.808	0.124838	0.854395	0.903654
NP_524100.1	mRpS31	mitochondrial ribosomal protein S31 [Drosophila melanogaster]	15	376	0.47	0.137286	-1.08927	0.862375
NP_573057.1	CG9281	CG9281, isoform B [Drosophila melanogaster]	15	611	1.476	0.137846	0.561693	0.860607
NP_001259264.1	CG4020	CG4020, isoform B [Drosophila melanogaster]	15	494	0.599	0.150307	-0.739372	0.823022
NP_001262163.1	Glg1	golgi complex-localized glycoprotein 1, isoform B [Drosophila melanogaster]	15	1107	0.746	0.151197	-0.422752	0.820457
NP_648289.2	Use1	unconventional SNARE in the ER 1 [Drosophila melanogaster]	15	250	1.649	0.15241	0.721591	0.816985
NP_524426.2	Cortactin	cortactin, isoform A [Drosophila melanogaster]	15	559	2.157	0.203584	1.10903	0.691256
NP_001247362.1	RpS8	ribosomal protein S8, isoform E [Drosophila melanogaster]	15	208	1.47	0.33111	0.555816	0.480027
NP_524907.2	rin	rasputin, isoform B [Drosophila melanogaster]	15	690	1.536	0.344418	0.619178	0.462914
NP_523684.2	Galphao	G protein alpha o subunit, isoform A [Drosophila melanogaster]	15	354	1.528	0.348788	0.611645	0.457439
NP_001285784.1	FKBP59	FK506-binding protein FKBP59, isoform B [Drosophila melanogaster]	15	439	1.188	0.367667	0.248535	0.434545
NP_523707.1	Cct5	T-complex chaperonin 5, isoform A [Drosophila melanogaster]	15	542	1.546	0.386248	0.62854	0.413133
NP_001286818.1	CG3209	CG3209, isoform D [Drosophila melanogaster]	15	537	1.141	0.398004	0.190299	0.400113
NP_611218.1	NT5E-2	Ecto-5'-nucleotidase 2, isoform A [Drosophila melanogaster]	15	585	1.288	0.411486	0.365133	0.385645
NP_610635.4	Cyp12d1-p	Cyp12d1-p, isoform A [Drosophila melanogaster]	15	521	0.709	0.442021	-0.496142	0.354558
NP_001036706.2	CG42327	uncharacterized protein Dmel_CG42327 [Drosophila melanogaster]	15	1429	1.406	0.443811	0.491597	0.352802
NP_650523.1	CG5903	CG5903, isoform A [Drosophila melanogaster]	15	226	0.753	0.472904	-0.409278	0.325227
NP_610401.1	CG8635	CG8635, isoform A [Drosophila melanogaster]	15	404	1.605	0.52622	0.682573	0.278833
NP_001163196.1	CG30122	uncharacterized protein Dmel_CG30122, isoform C [Drosophila melanogaster]	15	1272	1.223	0.568574	0.290424	0.245213
NP_001014522.2	Mp20	muscle protein 20, isoform C [Drosophila melanogaster]	15	189	1.239	0.586458	0.309176	0.231763
NP_611686.2	Vps20	vacuolar protein sorting 20, isoform C [Drosophila melanogaster]	15	212	1.216	0.588089	0.282143	0.230557
NP_477014.1	La	La autoantigen-like [Drosophila melanogaster]	15	390	0.812	0.609828	-0.300448	0.214792
NP_650717.1	CG7675	CG7675, isoform B [Drosophila melanogaster]	15	336	1.245	0.66658	0.316146	0.176148
NP_651849.1	CG1544	CG1544 [Drosophila melanogaster]	15	919	0.864	0.685696	-0.210897	0.163868
NP_648512.2	CG5946	CG5946, isoform B [Drosophila melanogaster]	15	316	1.238	0.711638	0.308011	0.147741
NP_001287107.1	Capr	caprin, isoform B [Drosophila melanogaster]	15	961	0.894	0.756858	-0.161653	0.120986
NP_524404.1	vib	vibrator, isoform A [Drosophila melanogaster]	15	272	0.795	0.81657	-0.330973	0.0880065
NP_728665.1	Gk2	glycerol kinase 2, isoform C [Drosophila melanogaster]	15	576	0.76	0.882586	-0.395929	0.0542428
NP_001260299.1	und	uninitiated, isoform B [Drosophila melanogaster]	15	448	1.149	0.885735	0.200379	0.0526963
NP_649139.1	Oat	ornithine aminotransferase precursor [Drosophila melanogaster]	15	431	0.937	0.978802	-0.093879	0.00930511
NP_647840.1	CG10863	uncharacterized protein Dmel_CG10863 [Drosophila melanogaster]	15	316	1.049	0.995419	0.0690147	0.00199396
NP_001285895.1	RpL24	ribosomal protein L24, isoform B [Drosophila melanogaster]	15	155	0.953	0.998612	-0.0694519	0.000603252
NP_724823.2	trpl	transient receptor potential-like, isoform D [Drosophila melanogaster]	14	1124	5.573	2.05028e-05	2.47845	4.68819
NP_611954.2	ND-19	NADH dehydrogenase (ubiquinone) 19 kDa subunit, isoform A [Drosophila melanogaster]	14	175	0.074	0.000184117	-3.75633	3.73491
NP_001246694.1	Hsp23	heat shock protein 23, isoform B [Drosophila melanogaster]	14	186	7.116	0.000202948	2.83107	3.69262
NP_572433.1	CG2233	CG2233 [Drosophila melanogaster]	14	414	0.163	0.000268637	-2.61706	3.57083
NP_569839.2	CG3777	CG3777, isoform B [Drosophila melanogaster]	14	879	4.774	0.000320145	2.2552	3.49465
NP_726472.1	Pof	painting of fourth, isoform A [Drosophila melanogaster]	14	495	5.794	0.000418442	2.53456	3.37836
NP_001284805.1	ND-B14.5A	NADH dehydrogenase (ubiquinone) B14.5 A subunit, isoform B [Drosophila melanogaster]	14	103	0.179	0.000646649	-2.48197	3.18933
NP_523527.1	Cyp4e3	cytochrome P450-4e3 [Drosophila melanogaster]	14	526	11.452	0.000894847	3.51753	3.04825
NP_001260063.1	mRpL28	mitochondrial ribosomal protein L28, isoform B [Drosophila melanogaster]	14	302	0.341	0.0010394	-1.55216	2.98322
NP_573110.1	UQCR-14	Ubiquinol-cytochrome c reductase 14 kDa subunit [Drosophila melanogaster]	14	111	0.18	0.00141794	-2.47393	2.84834
NP_001262211.1	Ten-m	tenascin major, isoform E [Drosophila melanogaster]	14	3349	2.263	0.00147989	1.17824	2.82977
NP_788363.1	Dg	dystroglycan, isoform D [Drosophila melanogaster]	14	1262	1.765	0.00188251	0.819668	2.72526
NP_476849.1	Src42A	Src oncogene at 42A, isoform A [Drosophila melanogaster]	14	517	1.867	0.00233054	0.900722	2.63254
NP_476644.1	Acp26Aa	accessory gland protein 26Aa [Drosophila melanogaster]	14	264	4.7	0.0038301	2.23266	2.41679
NP_001260333.1	Cand1	Cullin-associated and neddylation-dissociated 1, isoform B [Drosophila melanogaster]	14	1248	2.289	0.00431258	1.19472	2.36526
NP_001097744.1	Ugt86Dd	Ugt86Dd [Drosophila melanogaster]	14	517	0.292	0.00455774	-1.77596	2.34125
NP_610333.1	CG8728	CG8728 [Drosophila melanogaster]	14	556	0.49	0.00472926	-1.02915	2.32521
NP_651674.3	CG14516	uncharacterized protein Dmel_CG14516, isoform B [Drosophila melanogaster]	14	999	0.699	0.00493421	-0.516636	2.30678
NP_572861.1	CG4332	CG4332 [Drosophila melanogaster]	14	562	0.603	0.00591742	-0.72977	2.22787
NP_001285018.1	CG1440	CG1440, isoform D [Drosophila melanogaster]	14	551	1.429	0.00601356	0.515006	2.22087
NP_524485.1	Syx18	syntaxin 18 [Drosophila melanogaster]	14	395	1.765	0.00614477	0.819668	2.21149
NP_001285108.1	Rpt3	regulatory particle triple-A ATPase 3, isoform B [Drosophila melanogaster]	14	413	1.743	0.00641969	0.801573	2.19249
NP_001285984.1	Cyt-c-p	cytochrome c proximal, isoform B [Drosophila melanogaster]	14	108	0.436	0.00676695	-1.1976	2.16961
NP_611155.3	unc-104	uncoordinated-104, isoform D [Drosophila melanogaster]	14	1739	2.417	0.00824851	1.27322	2.08362
NP_726886.1	HIP-R	Hsc/Hsp70-interacting protein related, isoform B [Drosophila melanogaster]	14	377	3.001	0.0113215	1.58544	1.94609
NP_650783.2	Cyp12a4	Cyp12a4 [Drosophila melanogaster]	14	536	0.389	0.0125577	-1.36216	1.90109
NP_001245427.1	unc-13	unc-13, isoform E [Drosophila melanogaster]	14	3186	2.912	0.0132852	1.54201	1.87663
NP_001246866.1	rgn	regeneration, isoform B [Drosophila melanogaster]	14	808	1.873	0.0145082	0.905351	1.83839
NP_788500.1	Est-6	esterase 6, isoform A [Drosophila melanogaster]	14	544	0.501	0.016208	-0.997117	1.79027
NP_651237.1	beta-PheRS	Phenylalanyl-tRNA synthetase, beta-subunit [Drosophila melanogaster]	14	589	1.856	0.0196839	0.892197	1.70589
NP_001285159.1	Sec16	secretory 16, isoform J [Drosophila melanogaster]	14	2242	2.329	0.0208656	1.21971	1.68057
NP_995906.1	HnRNP-K	heterogeneous nuclear ribonucleoprotein K, isoform C [Drosophila melanogaster]	14	502	1.383	0.023784	0.467801	1.62372
NP_524826.1	TrpRS	Tryptophanyl-tRNA synthetase [Drosophila melanogaster]	14	430	2.325	0.0263126	1.21723	1.57984
NP_001285130.1	CG1703	CG1703, isoform B [Drosophila melanogaster]	14	901	1.753	0.0263378	0.809826	1.57942
NP_728294.1	COX6B	cytochrome c oxidase subunit 6B, isoform A [Drosophila melanogaster]	14	96	0.313	0.0271445	-1.67577	1.56632
NP_001014513.1	stmA	stambha A, isoform C [Drosophila melanogaster]	14	834	1.615	0.0357113	0.691534	1.44719
NP_001036747.1	CG4467	CG4467, isoform B [Drosophila melanogaster]	14	1125	1.776	0.0388579	0.828632	1.41052
NP_724277.2	CG31678	uncharacterized protein Dmel_CG31678, isoform B [Drosophila melanogaster]	14	1417	1.947	0.0401142	0.961253	1.3967
NP_726016.1	CG30291	uncharacterized protein Dmel_CG30291 [Drosophila melanogaster]	14	509	1.674	0.0412115	0.7433	1.38498
NP_651582.1	ALiX	ALG-2 interacting protein X [Drosophila melanogaster]	14	836	1.38	0.0423883	0.464668	1.37275
NP_610384.1	Mal-A8	maltase A8 [Drosophila melanogaster]	14	588	2.643	0.0475222	1.40218	1.3231
NP_651250.2	Golgin84	Golgin-84 [Drosophila melanogaster]	14	516	2.263	0.0525558	1.17824	1.27938
NP_649560.1	RpL13A	ribosomal protein L13A, isoform B [Drosophila melanogaster]	14	205	0.703	0.062183	-0.508403	1.20633
NP_728162.1	CG32549	uncharacterized protein Dmel_CG32549, isoform E [Drosophila melanogaster]	14	630	1.632	0.0626989	0.706641	1.20274
NP_652606.1	c11.1	c11.1, isoform A [Drosophila melanogaster]	14	1742	2.397	0.098118	1.26123	1.00825
NP_001260375.1	Ca-beta	Ca2+-channel-protein-beta-subunit, isoform L [Drosophila melanogaster]	14	844	2.209	0.10642	1.14339	0.972976
NP_524586.1	Mlc2	myosin light chain 2 [Drosophila melanogaster]	14	222	1.881	0.125099	0.9115	0.902746
NP_524053.2	RpS4	ribosomal protein S4, isoform B [Drosophila melanogaster]	14	261	1.506	0.130395	0.590722	0.88474
NP_001286784.1	CG5554	CG5554, isoform B [Drosophila melanogaster]	14	330	1.872	0.149021	0.90458	0.826753
NP_725686.1	CG4847	CG4847, isoform D [Drosophila melanogaster]	14	420	1.407	0.155987	0.492622	0.806911
NP_995862.1	Psi	P-element somatic inhibitor, isoform C [Drosophila melanogaster]	14	797	1.601	0.161956	0.678973	0.790604
NP_477060.1	igl	igloo, isoform A [Drosophila melanogaster]	14	240	2.184	0.194713	1.12697	0.710604
NP_652063.1	l(2)k14710	lethal (2) k14710, isoform A [Drosophila melanogaster]	14	861	1.569	0.202162	0.649845	0.694301
NP_001246234.1	Pfk	phosphofructokinase, isoform D [Drosophila melanogaster]	14	950	1.702	0.220251	0.767231	0.657083
NP_651987.1	Vha36-1	vacuolar H[+] ATPase 36kD subunit 1 [Drosophila melanogaster]	14	246	0.239	0.255088	-2.06492	0.59331
NP_511161.2	Top1	topoisomerase 1, isoform A [Drosophila melanogaster]	14	974	0.671	0.258526	-0.575615	0.587496
NP_608819.1	CG3702	CG3702, isoform A [Drosophila melanogaster]	14	641	1.212	0.300464	0.27739	0.522208
NP_523439.2	l(2)gl	lethal (2) giant larvae, isoform C [Drosophila melanogaster]	14	1161	1.302	0.311925	0.380729	0.50595
NP_725995.1	exu	exuperantia, isoform A [Drosophila melanogaster]	14	532	1.419	0.329241	0.504875	0.482486
NP_731649.2	Cad87A	cadherin 87A [Drosophila melanogaster]	14	1975	1.237	0.357447	0.306846	0.446788
NP_732610.1	Rab1	Rab1 [Drosophila melanogaster]	14	205	0.828	0.368231	-0.272297	0.433879
NP_725288.1	IMPPP	immune induced molecule prepropeptide, isoform A [Drosophila melanogaster]	14	257	0.625	0.370151	-0.678072	0.431621
NP_523533.2	me31B	maternal expression at 31B, isoform A [Drosophila melanogaster]	14	459	0.623	0.375249	-0.682696	0.425681
NP_733278.1	CG11897	uncharacterized protein Dmel_CG11897, isoform A [Drosophila melanogaster]	14	1374	0.784	0.397956	-0.351074	0.400165
NP_001259313.1	Tom40	translocase of outer membrane 40, isoform C [Drosophila melanogaster]	14	344	0.695	0.40777	-0.524915	0.389585
NP_476773.1	tud	tudor, isoform A [Drosophila melanogaster]	14	2515	1.4	0.515585	0.485427	0.2877
NP_525120.1	Nop60B	nucleolar protein at 60B, isoform A [Drosophila melanogaster]	14	508	0.716	0.531794	-0.481969	0.274257
NP_001036722.1	Dys	dystrophin, isoform H [Drosophila melanogaster]	14	3598	1.332	0.591396	0.413594	0.228121
NP_648062.2	CG10077	uncharacterized protein Dmel_CG10077, isoform A [Drosophila melanogaster]	14	818	1.198	0.593634	0.260628	0.226481
NP_650679.3	Prx5	peroxiredoxin 5, isoform A [Drosophila melanogaster]	14	190	0.882	0.726877	-0.181149	0.138539
NP_728599.1	CG2199	CG2199, isoform B [Drosophila melanogaster]	14	733	0.75	0.738982	-0.415037	0.131366
NP_524312.1	Adk3	adenylate kinase 3, isoform A [Drosophila melanogaster]	14	216	1.112	0.835985	0.153157	0.0778016
NP_523774.1	RpL18A	ribosomal protein L18A [Drosophila melanogaster]	14	177	0.889	0.850002	-0.169745	0.0705801
NP_649070.1	RpL26	ribosomal protein L26, isoform A [Drosophila melanogaster]	14	149	0.898	0.853001	-0.155213	0.0690506
NP_651187.2	Nup98-96	nucleoporin 98-96kD, isoform A [Drosophila melanogaster]	14	1960	1.32	0.874361	0.400538	0.0583091
NP_649679.1	Ccp84Ae	Ccp84Ae [Drosophila melanogaster]	14	208	1.185	0.89872	0.244887	0.0463757
NP_726794.1	D2hgdh	D-2-hydroxyglutaric acid dehydrogenase, isoform B [Drosophila melanogaster]	14	533	1.172	0.93215	0.228973	0.0305144
NP_649004.1	CG7460	CG7460, isoform B [Drosophila melanogaster]	14	486	1.099	0.955255	0.136191	0.0198807
NP_476853.1	bic	bicaudal, isoform A [Drosophila melanogaster]	14	169	1.192	0.956235	0.253384	0.0194351
NP_610852.1	CG4670	CG4670, isoform A [Drosophila melanogaster]	14	637	1.074	0.967947	0.102994	0.0141484
NP_001285329.1	eIF-2alpha	eukaryotic translation initiation factor 2alpha, isoform B [Drosophila melanogaster]	14	341	1.05	0.998352	0.0703893	0.000716137
NP_648415.1	CG6409	CG6409, isoform A [Drosophila melanogaster]	14	360	0.961	0.999943	-0.0573917	2.48761e-05
NP_476735.1	Sod1	superoxide dismutase 1, isoform A [Drosophila melanogaster]	14	153	1.016	0.999984	0.0229004	6.83033e-06
NP_001027048.1	ND-ASHI	NADH dehydrogenase (ubiquinone) ASHI subunit, isoform B [Drosophila melanogaster]	13	175	0.124	0.000143341	-3.01159	3.84363
NP_651972.1	ND-PDSW	NADH dehydrogenase (ubiquinone) PDSW subunit, isoform A [Drosophila melanogaster]	13	159	0.104	0.000477752	-3.26534	3.3208
NP_001260364.1	Porin2	Porin2, isoform B [Drosophila melanogaster]	13	293	5.372	0.00103384	2.42546	2.98555
NP_599144.1	Patj	patj, isoform A [Drosophila melanogaster]	13	871	2.469	0.00202226	1.30393	2.69416
NP_536738.3	rdgC	retinal degeneration C, isoform F [Drosophila melanogaster]	13	746	2.458	0.0025818	1.29748	2.58808
NP_001245939.1	Snx6	sorting nexin 6, isoform B [Drosophila melanogaster]	13	455	1.43	0.00320875	0.516015	2.49366
NP_001137770.1	ND-B17.2	NADH dehydrogenase (ubiquinone) B17.2 subunit, isoform B [Drosophila melanogaster]	13	142	0.146	0.00508026	-2.77596	2.29411
NP_524345.2	Adgf-D	adenosine deaminase-related growth factor D [Drosophila melanogaster]	13	502	1.696	0.00510708	0.762136	2.29183
NP_651668.1	CG11876	uncharacterized protein Dmel_CG11876, isoform D [Drosophila melanogaster]	13	365	0.495	0.00522945	-1.0145	2.28154
NP_730568.1	tzn	tenzing norgay, isoform C [Drosophila melanogaster]	13	348	0.494	0.00528692	-1.01742	2.2768
NP_524925.1	Hsp60B	heat shock protein 60B [Drosophila melanogaster]	13	648	7.056	0.00534396	2.81885	2.27214
NP_647661.1	mRpL46	mitochondrial ribosomal protein L46 [Drosophila melanogaster]	13	258	0.206	0.00571616	-2.27928	2.2429
NP_995605.1	Plc21C	phospholipase C at 21C, isoform D [Drosophila melanogaster]	13	1318	1.799	0.00768822	0.847195	2.11417
NP_524884.1	RpS14a	ribosomal protein S14a, isoform B [Drosophila melanogaster]	13	151	1.717	0.00957789	0.77989	2.01873
NP_523749.2	Cyp6a8	cytochrome P450-6a8 [Drosophila melanogaster]	13	506	2.247	0.00969495	1.168	2.01345
NP_001036341.2	homer	homer, isoform E [Drosophila melanogaster]	13	531	2.575	0.0102946	1.36457	1.98739
NP_001259175.1	Pgd	phosphogluconate dehydrogenase, isoform B [Drosophila melanogaster]	13	481	1.829	0.0123668	0.871055	1.90774
NP_001097238.1	Drep2	DNA fragmentation factor-related protein 2, isoform B [Drosophila melanogaster]	13	549	2.252	0.013197	1.17121	1.87953
NP_001245598.1	Cht6	chitinase 6, isoform C [Drosophila melanogaster]	13	4611	1.804	0.0139389	0.851199	1.85577
NP_733405.2	cindr	CIN85 and CD2AP related, isoform C [Drosophila melanogaster]	13	882	2.168	0.0140064	1.11636	1.85367
NP_001163600.1	Ace	acetylcholine esterase, isoform B [Drosophila melanogaster]	13	649	2.133	0.0153058	1.09288	1.81515
NP_573357.1	Mec2	Mec2 [Drosophila melanogaster]	13	350	1.867	0.0160626	0.900722	1.79418
NP_001261484.1	CG10103	uncharacterized protein Dmel_CG10103, isoform C [Drosophila melanogaster]	13	396	1.978	0.0167441	0.984042	1.77614
NP_731765.1	CG46280	uncharacterized protein Dmel_CG46280, isoform B [Drosophila melanogaster]	13	532	1.94	0.023714	0.956057	1.625
NP_573000.1	CG5599	CG5599 [Drosophila melanogaster]	13	462	0.444	0.0237269	-1.17137	1.62476
NP_001163531.1	Dmtn	dementin, isoform H [Drosophila melanogaster]	13	679	1.886	0.0262382	0.91533	1.58107
NP_523415.1	AP-1-2beta	adaptor protein complex 1/2, beta subunit [Drosophila melanogaster]	13	921	2.363	0.0317943	1.24062	1.49765
NP_648923.1	nudC	nudC, isoform A [Drosophila melanogaster]	13	332	2.098	0.0339567	1.06901	1.46907
NP_523571.1	ck	crinkled, isoform B [Drosophila melanogaster]	13	2167	1.6	0.0403022	0.678072	1.39467
NP_001246578.1	Spn	spinophilin, isoform J [Drosophila melanogaster]	13	2148	2.226	0.0435802	1.15445	1.36071
NP_524742.1	mRpL12	mitochondrial ribosomal protein L12 [Drosophila melanogaster]	13	182	0.168	0.0446606	-2.57347	1.35008
NP_001262811.1	CASK	CASK, isoform H [Drosophila melanogaster]	13	929	1.799	0.045964	0.847195	1.33758
NP_651208.1	CG5991	CG5991, isoform A [Drosophila melanogaster]	13	447	0.427	0.0491483	-1.22769	1.30849
NP_001188678.1	Rab35	Rab35, isoform B [Drosophila melanogaster]	13	201	1.378	0.0503241	0.462576	1.29822
NP_650954.1	CG5862	CG5862 [Drosophila melanogaster]	13	309	1.467	0.0506556	0.552869	1.29537
NP_726650.2	CG32017	uncharacterized protein Dmel_CG32017, isoform B [Drosophila melanogaster]	13	482	2.181	0.0535506	1.12499	1.27124
NP_477098.1	Rho1	Rho1, isoform A [Drosophila melanogaster]	13	192	1.538	0.054147	0.621056	1.26643
NP_524647.2	sif	still life, isoform A [Drosophila melanogaster]	13	2052	2.846	0.0584973	1.50894	1.23286
NP_995614.1	Slh	SLY-1 homologous, isoform C [Drosophila melanogaster]	13	639	1.703	0.0641914	0.768078	1.19252
NP_730192.2	Lasp	lasp, isoform B [Drosophila melanogaster]	13	657	2.115	0.0657333	1.08066	1.18221
NP_650596.1	GckIII	germinal centre kinase III [Drosophila melanogaster]	13	642	1.324	0.0735739	0.404903	1.13328
NP_609322.1	CG4598	CG4598, isoform A [Drosophila melanogaster]	13	281	0.509	0.0764657	-0.974262	1.11653
NP_001027401.1	CG18003	uncharacterized protein Dmel_CG18003 [Drosophila melanogaster]	13	366	2.352	0.0842518	1.23389	1.07442
NP_523493.3	cup	cup, isoform B [Drosophila melanogaster]	13	1117	0.357	0.0862333	-1.486	1.06432
NP_001014491.1	ref(2)P	refractory to sigma P, isoform B [Drosophila melanogaster]	13	599	2.085	0.0986441	1.06005	1.00593
NP_524116.2	Su(P)	suppressor of ref(2)P sterility [Drosophila melanogaster]	13	417	0.445	0.101953	-1.16812	0.9916
NP_001246734.1	CG10616	uncharacterized protein Dmel_CG10616, isoform B [Drosophila melanogaster]	13	508	1.314	0.10321	0.393965	0.98628
NP_524597.1	Sap-r	Saposin-related, isoform A [Drosophila melanogaster]	13	953	0.38	0.104478	-1.39593	0.980977
NP_651330.1	veli	veli, isoform A [Drosophila melanogaster]	13	195	1.624	0.110074	0.699552	0.958316
NP_650840.1	Arc42	Arc42 [Drosophila melanogaster]	13	405	0.673	0.110152	-0.571322	0.958009
NP_648514.1	RpL10Ab	ribosomal protein L10Ab, isoform A [Drosophila melanogaster]	13	217	0.759	0.154346	-0.397828	0.811506
NP_476925.1	Sod2	superoxide dismutase 2 (Mn), isoform A [Drosophila melanogaster]	13	217	0.599	0.208611	-0.739372	0.680662
NP_611374.1	CG15080	uncharacterized protein Dmel_CG15080 [Drosophila melanogaster]	13	1541	1.51	0.21795	0.594549	0.661644
NP_523813.1	RpL23	ribosomal protein L23 [Drosophila melanogaster]	13	140	0.896	0.233517	-0.158429	0.631682
NP_476625.2	Mal-A2	maltase A2 [Drosophila melanogaster]	13	567	0.634	0.237824	-0.657445	0.623745
NP_728273.1	RpS10b	ribosomal protein S10b, isoform B [Drosophila melanogaster]	13	160	1.61	0.275186	0.687061	0.560374
NP_001260415.1	Elf	Ef1alpha-like factor, isoform B [Drosophila melanogaster]	13	619	1.377	0.284554	0.461529	0.545836
NP_648268.1	ValRS-m	Valyl-tRNA synthetase, mitochondrial, isoform A [Drosophila melanogaster]	13	994	1.204	0.466625	0.267835	0.331032
NP_608777.1	Snx1	sorting nexin 1, isoform A [Drosophila melanogaster]	13	458	1.238	0.52895	0.308011	0.276586
NP_001246325.1	Rpn6	regulatory particle non-ATPase 6, isoform C [Drosophila melanogaster]	13	422	1.496	0.547886	0.58111	0.26131
NP_001097742.1	CG6567	CG6567 [Drosophila melanogaster]	13	235	0.77	0.642945	-0.37707	0.191826
NP_651278.2	Ppox	protoporphyrinogen oxidase [Drosophila melanogaster]	13	475	0.83	0.647263	-0.268817	0.188919
NP_726074.2	Fkbp14	FK506-binding protein 14, isoform C [Drosophila melanogaster]	13	216	1.542	0.70035	0.624803	0.154685
NP_648242.1	CG5989	CG5989, isoform A [Drosophila melanogaster]	13	436	0.897	0.738157	-0.15682	0.131851
NP_724013.1	Ugt36Bc	Ugt36Bc, isoform B [Drosophila melanogaster]	13	543	1.09	0.74637	0.124328	0.127046
NP_608445.2	CG1718	CG1718, isoform B [Drosophila melanogaster]	13	1714	0.849	0.84525	-0.236164	0.0730147
NP_001260258.1	Acer	Angiotensin-converting enzyme-related, isoform B [Drosophila melanogaster]	13	630	1.245	0.938814	0.316146	0.0274204
NP_610462.3	shrb	shrub [Drosophila melanogaster]	13	226	1.192	0.951476	0.253384	0.0216021
NP_725534.1	Got1	glutamate oxaloacetate transaminase 1, isoform B [Drosophila melanogaster]	13	437	1.094	0.990178	0.129613	0.00428683
NP_477034.1	tsr	twinstar [Drosophila melanogaster]	13	148	1.065	0.995028	0.0908534	0.00216457
NP_001262490.1	GC1	glutamate carrier 1, isoform B [Drosophila melanogaster]	13	321	1.099	0.996031	0.136191	0.00172718
NP_651456.1	Dak1	Dak1 [Drosophila melanogaster]	13	253	1.033	0.997903	0.0468403	0.0009118
NP_611205.1	CG30101	uncharacterized protein Dmel_CG30101 [Drosophila melanogaster]	13	328	0.95	0.999073	-0.0740006	0.000402882
NP_724018.1	AspRS-m	Aspartyl-tRNA synthetase, mitochondrial, isoform A [Drosophila melanogaster]	13	1082	0.977	0.999363	-0.0335695	0.000276602
NP_726106.1	HmgZ	HMG protein Z, isoform A [Drosophila melanogaster]	13	111	0.951	0.999844	-0.0724828	6.78047e-05
NP_524494.1	OstStt3	oligosaccharyl transferase 3 [Drosophila melanogaster]	13	774	0.994	0.999997	-0.00868224	1.25925e-06
NP_572810.1	CG1824	CG1824 [Drosophila melanogaster]	12	761	0.288	3.05953e-05	-1.79586	4.51434
NP_732383.1	EndoA	endophilin A, isoform A [Drosophila melanogaster]	12	369	2.346	8.87844e-05	1.2302	4.05166
NP_650931.1	CG10827	uncharacterized protein Dmel_CG10827 [Drosophila melanogaster]	12	522	0.12	0.000152802	-3.05889	3.81587
NP_523784.2	Pepck	phosphoenolpyruvate carboxykinase [Drosophila melanogaster]	12	647	6.93	0.000168325	2.79286	3.77385
NP_523768.1	Amy-d	amylase distal [Drosophila melanogaster]	12	494	0.386	0.000198451	-1.37333	3.70235
NP_523949.2	Prat2	phosphoribosylamidotransferase 2, isoform B [Drosophila melanogaster]	12	547	2.306	0.000251656	1.20539	3.59919
NP_651049.3	AP-2mu	adaptor protein complex 2, mu subunit, isoform B [Drosophila melanogaster]	12	437	2.629	0.000578518	1.39451	3.23768
NP_001260339.1	mRpS7	mitochondrial ribosomal protein S7, isoform B [Drosophila melanogaster]	12	218	0.39	0.00115285	-1.35845	2.93823
NP_001285987.1	yellow-b	yellow-b, isoform B [Drosophila melanogaster]	12	453	3.531	0.00126318	1.82008	2.89854
NP_511087.1	Cp36	chorion protein 36 [Drosophila melanogaster]	12	284	0.158	0.00168428	-2.662	2.77359
NP_476666.1	arm	armadillo, isoform A [Drosophila melanogaster]	12	843	2.557	0.00256963	1.35445	2.59013
NP_724223.4	fbp	fructose-1,6-bisphosphatase, isoform F [Drosophila melanogaster]	12	343	1.808	0.00280051	0.854395	2.55276
NP_732204.1	kuk	kugelkern, isoform B [Drosophila melanogaster]	12	570	3.874	0.00310354	1.95382	2.50814
NP_608929.1	CG7382	CG7382 [Drosophila melanogaster]	12	236	0.789	0.00343909	-0.341903	2.46356
NP_611790.1	eIF2B-delta	eIF2B-delta, isoform A [Drosophila melanogaster]	12	626	2.639	0.0047529	1.39999	2.32304
NP_609537.1	CG6766	CG6766 [Drosophila melanogaster]	12	525	1.325	0.00544676	0.405992	2.26386
NP_572694.1	Dlic	dynein light intermediate chain, isoform A [Drosophila melanogaster]	12	493	2.454	0.00711143	1.29514	2.14804
NP_648409.1	ND-13B	NADH dehydrogenase (ubiquinone) 13 kDa B subunit [Drosophila melanogaster]	12	124	0.133	0.00726278	-2.9105	2.1389
NP_001284797.1	Rbcn-3B	Rabconnectin-3B, isoform B [Drosophila melanogaster]	12	1525	2.2	0.00731824	1.1375	2.13559
NP_729613.1	S-Lap4	Sperm-Leucylaminopeptidase 4 [Drosophila melanogaster]	12	524	4.436	0.00827192	2.14926	2.08239
NP_001284943.1	ND-B16.6	NADH dehydrogenase (ubiquinone) B16.6 subunit, isoform B [Drosophila melanogaster]	12	154	0.229	0.0109516	-2.12658	1.96052
NP_001261023.1	Atg9	Autophagy-related 9, isoform B [Drosophila melanogaster]	12	852	1.586	0.0126001	0.665393	1.89963
NP_001188695.1	Msp300	Muscle-specific protein 300 kDa, isoform G [Drosophila melanogaster]	12	13540	2.858	0.0134844	1.51501	1.87017
NP_001260993.1	SRPK	SR protein kinase, isoform D [Drosophila melanogaster]	12	939	1.944	0.0144859	0.959028	1.83905
NP_610326.1	CG1882	CG1882, isoform A [Drosophila melanogaster]	12	454	2.165	0.0189155	1.11437	1.72318
NP_524385.2	CREG	cellular repressor of E1A-stimulated genes, isoform A [Drosophila melanogaster]	12	211	1.881	0.0224305	0.9115	1.64916
NP_650199.1	CG5844	CG5844 [Drosophila melanogaster]	12	378	0.596	0.0240399	-0.746616	1.61907
NP_001285196.1	mew	multiple edematous wings, isoform F [Drosophila melanogaster]	12	1243	1.8	0.0272168	0.847997	1.56516
NP_648588.1	nst	nesthocker [Drosophila melanogaster]	12	549	1.893	0.0289908	0.920674	1.53774
NP_001036641.1	Snap25	Synaptosomal-associated protein 25kDa, isoform A [Drosophila melanogaster]	12	212	1.472	0.0309018	0.557778	1.51002
NP_001259560.1	Rab3-GEF	Rab3 GDP-GTP exchange factor, isoform H [Drosophila melanogaster]	12	2154	2.159	0.031856	1.11036	1.49681
NP_610743.2	Cyp6g1	Cyp6g1, isoform A [Drosophila melanogaster]	12	524	1.986	0.0350169	0.989866	1.45572
NP_524274.1	RpA-70	replication protein A 70 [Drosophila melanogaster]	12	603	0.531	0.0361108	-0.913216	1.44236
NP_649602.2	ECSIT	ECSIT [Drosophila melanogaster]	12	409	0.726	0.0372522	-0.461959	1.42885
NP_730610.3	CG9391	CG9391, isoform C [Drosophila melanogaster]	12	278	1.458	0.057802	0.543991	1.23806
NP_001036444.1	p120ctn	adherens junction protein p120 [Drosophila melanogaster]	12	781	1.796	0.0609463	0.844787	1.21505
NP_001246073.1	Arr1	arrestin 1, isoform B [Drosophila melanogaster]	12	364	1.754	0.0718169	0.810649	1.14377
NP_788485.1	SrpRbeta	signal recognition particle receptor beta, isoform A [Drosophila melanogaster]	12	244	0.655	0.0732449	-0.610433	1.13522
NP_608884.1	Scox	synthesis of cytochrome c oxidase [Drosophila melanogaster]	12	251	0.597	0.0736639	-0.744197	1.13275
NP_996372.1	CG2258	CG2258, isoform B [Drosophila melanogaster]	12	801	1.863	0.082842	0.897628	1.08175
NP_611356.1	Gint3	GDI interacting protein 3, isoform D [Drosophila melanogaster]	12	441	1.644	0.102155	0.71721	0.990739
NP_648983.1	QIL1	QIL1 [Drosophila melanogaster]	12	122	0.481	0.105802	-1.05589	0.975504
NP_727075.1	schlank	schlank, isoform A [Drosophila melanogaster]	12	400	1.694	0.117614	0.760434	0.92954
NP_001137633.1	Syb	synaptobrevin, isoform C [Drosophila melanogaster]	12	152	1.504	0.123699	0.588805	0.907632
NP_648239.1	CG6638	CG6638 [Drosophila melanogaster]	12	420	0.741	0.125844	-0.432455	0.900166
NP_651930.2	Gat	GABA transporter, isoform A [Drosophila melanogaster]	12	636	1.608	0.130769	0.685267	0.883495
NP_610395.1	CG8735	CG8735, isoform A [Drosophila melanogaster]	12	387	1.71	0.130932	0.773996	0.882953
NP_525099.3	Hrs	hepatocyte growth factor regulated tyrosine kinase substrate, isoform B [Drosophila melanogaster]	12	760	1.691	0.133953	0.757877	0.873047
NP_722910.2	pgant4	polypeptide GalNAc transferase 4, isoform C [Drosophila melanogaster]	12	644	0.738	0.135064	-0.438307	0.869461
NP_477412.1	nop5	nop5 [Drosophila melanogaster]	12	511	0.775	0.14154	-0.367732	0.849122
NP_649333.1	CRIF	CR6-interacting factor [Drosophila melanogaster]	12	232	0.588	0.146819	-0.766112	0.833217
NP_728590.1	CG9186	CG9186, isoform A [Drosophila melanogaster]	12	307	0.529	0.160751	-0.91866	0.793847
NP_648236.1	GstO2	glutathione S transferase O2, isoform B [Drosophila melanogaster]	12	250	0.825	0.176094	-0.277534	0.754255
NP_001188767.1	CG4747	CG4747, isoform B [Drosophila melanogaster]	12	603	1.682	0.196615	0.750178	0.706384
NP_001245732.1	wupA	wings up A, isoform H [Drosophila melanogaster]	12	260	1.927	0.218489	0.946357	0.66057
NP_524022.1	mRpL2	mitochondrial ribosomal protein L2 [Drosophila melanogaster]	12	294	0.719	0.227052	-0.475936	0.643874
NP_523469.2	ed	echinoid, isoform A [Drosophila melanogaster]	12	1332	1.25	0.247854	0.321928	0.605805
NP_001188849.1	CG16771	uncharacterized protein Dmel_CG16771, isoform C [Drosophila melanogaster]	12	596	1.163	0.268086	0.217851	0.571726
NP_724614.1	Prosalpha1	proteasome alpha1 subunit, isoform A [Drosophila melanogaster]	12	244	1.264	0.303509	0.337996	0.517828
NP_523778.2	Dcr-2	Dicer-2, isoform A [Drosophila melanogaster]	12	1722	1.244	0.319568	0.314986	0.495437
NP_524690.1	DCTN2-p50	dynactin 2, p50 subunit [Drosophila melanogaster]	12	380	1.242	0.319625	0.312665	0.49536
NP_610813.3	CG8768	CG8768 [Drosophila melanogaster]	12	302	0.662	0.33557	-0.595097	0.474216
NP_001285697.1	Coprox	coproporphyrinogen oxidase, isoform B [Drosophila melanogaster]	12	390	0.738	0.33753	-0.438307	0.471688
NP_611087.1	CysRS	Cysteinyl-tRNA synthetase [Drosophila melanogaster]	12	741	1.521	0.345524	0.60502	0.461522
NP_788342.1	AGBE	1,4-Alpha-Glucan branching enzyme [Drosophila melanogaster]	12	685	1.195	0.34735	0.257011	0.459233
NP_729089.2	CG10576	uncharacterized protein Dmel_CG10576, isoform C [Drosophila melanogaster]	12	391	0.85	0.348975	-0.234465	0.457206
NP_651600.1	mfrn	mitoferrin [Drosophila melanogaster]	12	379	1.134	0.398711	0.181421	0.399341
NP_001285747.1	RpS13	ribosomal protein S13, isoform C [Drosophila melanogaster]	12	151	1.284	0.563777	0.360645	0.248893
NP_572332.1	CG3226	CG3226 [Drosophila melanogaster]	12	230	1.182	0.606668	0.24123	0.217049
NP_611952.1	CG3663	CG3663 [Drosophila melanogaster]	12	208	0.567	0.617754	-0.818579	0.209185
NP_647860.1	Chd64	Chd64, isoform B [Drosophila melanogaster]	12	188	1.397	0.617981	0.482332	0.209025
NP_001286133.1	RpL21	ribosomal protein L21, isoform C [Drosophila melanogaster]	12	159	0.852	0.640858	-0.231075	0.193238
NP_723155.1	CG9175	CG9175, isoform B [Drosophila melanogaster]	12	445	1.145	0.695989	0.195348	0.157398
NP_652058.1	Dek	Dek, isoform B [Drosophila melanogaster]	12	669	1.21	0.71853	0.275007	0.143555
NP_648837.2	IleRS-m	Isoleucyl-tRNA synthetase, mitochondrial [Drosophila melanogaster]	12	941	0.842	0.730645	-0.248108	0.136294
NP_610509.2	GstT1	glutathione S transferase T1 [Drosophila melanogaster]	12	228	0.701	0.760974	-0.512514	0.11863
NP_524923.1	Sam-S	S-adenosylmethionine synthetase, isoform C [Drosophila melanogaster]	12	408	1.172	0.8136	0.228973	0.0895893
NP_727427.1	PPP4R2r	protein phosphatase 4 regulatory subunit 2-related protein, isoform A [Drosophila melanogaster]	12	609	1.301	0.815591	0.379621	0.0885275
NP_523366.2	Cyp1	cyclophilin 1 [Drosophila melanogaster]	12	227	0.926	0.851193	-0.110916	0.0699718
NP_477298.2	Cht2	chitinase 2, isoform A [Drosophila melanogaster]	12	484	1.129	0.872188	0.175045	0.05939
NP_652700.1	CG18858	uncharacterized protein Dmel_CG18858, isoform A [Drosophila melanogaster]	12	421	0.897	0.905278	-0.15682	0.0432179
NP_523625.1	Act42A	actin 42A [Drosophila melanogaster]	12	376	1.07	0.932586	0.0976108	0.030311
NP_001263104.1	Fer1HCH	ferritin 1 heavy chain homologue, isoform I [Drosophila melanogaster]	12	245	0.905	0.934568	-0.14401	0.0293893
NP_649688.1	CG1105	CG1105 [Drosophila melanogaster]	12	422	1.292	0.961898	0.369606	0.0168708
NP_729634.1	CG6404	CG6404, isoform A [Drosophila melanogaster]	12	441	0.831	0.971126	-0.26708	0.0127245
NP_609119.2	CG5958	CG5958 [Drosophila melanogaster]	12	294	1.284	0.972977	0.360645	0.0118973
NP_523444.1	Spp	signal peptide peptidase [Drosophila melanogaster]	12	389	0.902	0.978364	-0.148801	0.00949961
NP_612065.1	CG13890	uncharacterized protein Dmel_CG13890 [Drosophila melanogaster]	12	262	1.092	0.988606	0.126973	0.0049769
NP_524226.1	Karybeta3	karyopherin beta 3, isoform A [Drosophila melanogaster]	12	1105	0.947	0.997433	-0.0785637	0.00111614
NP_001260099.1	cl	clot, isoform C [Drosophila melanogaster]	12	126	0.942	0.997847	-0.086201	0.000936001
NP_001097606.1	ome	omega, isoform G [Drosophila melanogaster]	12	1040	1.016	0.999768	0.0229004	0.000100758
NP_732309.1	14-3-3epsilon	14-3-3epsilon, isoform A [Drosophila melanogaster]	12	262	0.933	0.999872	-0.100051	5.5805e-05
NP_651114.1	CG17121	uncharacterized protein Dmel_CG17121 [Drosophila melanogaster]	11	361	2.247	4.8391e-05	1.168	4.31524
NP_524611.1	Ef1alpha100E	elongation factor 1alpha100E, isoform A [Drosophila melanogaster]	11	462	4.071	0.000138086	2.02538	3.85985
NP_524875.1	arg	arginase [Drosophila melanogaster]	11	351	2.284	0.000182656	1.19156	3.73837
NP_476929.1	Nmdmc	NAD-dependent methylenetetrahydrofolate dehydrogenase, isoform B [Drosophila melanogaster]	11	309	1.832	0.000319551	0.87342	3.49546
NP_523828.1	mRpL43	mitochondrial ribosomal protein L43 [Drosophila melanogaster]	11	192	0.416	0.000733462	-1.26534	3.13462
NP_731141.1	sas	stranded at second, isoform B [Drosophila melanogaster]	11	1693	3.73	0.0011226	1.89918	2.94978
NP_524130.1	Adgf-A	adenosine deaminase-related growth factor A, isoform A [Drosophila melanogaster]	11	553	0.444	0.00134609	-1.17137	2.87093
NP_001286937.1	Src64B	Src oncogene at 64B, isoform K [Drosophila melanogaster]	11	553	2.072	0.00197138	1.05102	2.70523
NP_726557.3	Syt7	synaptotagmin 7, isoform A [Drosophila melanogaster]	11	416	2.496	0.00226385	1.31962	2.64515
NP_572345.1	CG3168	CG3168, isoform A [Drosophila melanogaster]	11	632	1.807	0.00242481	0.853597	2.61532
NP_608533.1	CG2794	CG2794 [Drosophila melanogaster]	11	700	0.486	0.00305713	-1.04097	2.51469
NP_650501.1	CG4546	CG4546 [Drosophila melanogaster]	11	457	5.101	0.00311508	2.35078	2.50653
NP_524651.2	chb	chromosome bows, isoform A [Drosophila melanogaster]	11	1491	2.887	0.00358047	1.52957	2.44606
NP_729679.2	IRSp53	IRSp53, isoform A [Drosophila melanogaster]	11	1076	6.532	0.00387879	2.70752	2.4113
NP_524417.1	2020-09-02	septin 2, isoform A [Drosophila melanogaster]	11	419	2.473	0.00425615	1.30626	2.37098
NP_001286048.1	CG10413	uncharacterized protein Dmel_CG10413, isoform B [Drosophila melanogaster]	11	941	1.466	0.00430283	0.551885	2.36625
NP_572898.1	CG32633	uncharacterized protein Dmel_CG32633, isoform A [Drosophila melanogaster]	11	285	0.361	0.00456766	-1.46993	2.34031
NP_730536.1	CG11796	uncharacterized protein Dmel_CG11796, isoform A [Drosophila melanogaster]	11	380	2.885	0.00472152	1.52857	2.32592
NP_788538.2	CG32206	uncharacterized protein Dmel_CG32206, isoform E [Drosophila melanogaster]	11	1278	1.7	0.00476306	0.765535	2.32211
NP_649541.1	mRpL44	mitochondrial ribosomal protein L44 [Drosophila melanogaster]	11	321	0.311	0.00488973	-1.68501	2.31071
NP_610116.2	Ac3	Ac3, isoform A [Drosophila melanogaster]	11	1167	1.999	0.00567583	0.999278	2.24597
NP_730432.1	CG9368	CG9368, isoform A [Drosophila melanogaster]	11	182	2.598	0.00574452	1.3774	2.24075
NP_609075.1	CG11236	uncharacterized protein Dmel_CG11236, isoform A [Drosophila melanogaster]	11	341	3.711	0.00616801	1.89181	2.20986
NP_524270.2	mRpS9	mitochondrial ribosomal protein S9 [Drosophila melanogaster]	11	395	0.387	0.00759801	-1.36959	2.1193
NP_652046.1	CG11899	uncharacterized protein Dmel_CG11899 [Drosophila melanogaster]	11	364	1.893	0.00842783	0.920674	2.07428
NP_648067.2	CG9953	CG9953 [Drosophila melanogaster]	11	508	0.43	0.0101339	-1.21759	1.99422
NP_649588.1	Rpn5	regulatory particle non-ATPase 5 [Drosophila melanogaster]	11	502	2.097	0.0103849	1.06833	1.9836
NP_651868.1	CG11334	uncharacterized protein Dmel_CG11334, isoform B [Drosophila melanogaster]	11	364	2.088	0.0105632	1.06212	1.97621
NP_524275.1	mRpL1	mitochondrial ribosomal protein L1 [Drosophila melanogaster]	11	354	0.511	0.0122038	-0.968605	1.91351
NP_787998.1	Akap200	A kinase anchor protein 200, isoform D [Drosophila melanogaster]	11	837	2.377	0.0123883	1.24914	1.90699
NP_648753.1	Pex3	peroxin 3, isoform A [Drosophila melanogaster]	11	385	1.581	0.0128095	0.660837	1.89247
NP_726155.1	Synj	synaptojanin, isoform A [Drosophila melanogaster]	11	1218	1.428	0.0137441	0.513996	1.86188
NP_649030.1	Cyp312a1	Cyp312a1, isoform A [Drosophila melanogaster]	11	510	1.914	0.0147661	0.936591	1.83074
NP_001285763.1	LManV	lysosomal alpha-mannosidase V, isoform B [Drosophila melanogaster]	11	982	0.519	0.0162036	-0.946194	1.79039
NP_523811.1	mRpS29	mitochondrial ribosomal protein S29 [Drosophila melanogaster]	11	392	0.332	0.0169879	-1.59074	1.76986
NP_610985.1	ND-B15	NADH dehydrogenase (ubiquinone) B15 subunit [Drosophila melanogaster]	11	113	0.086	0.0176843	-3.53952	1.75241
NP_511075.3	sws	swiss cheese, isoform A [Drosophila melanogaster]	11	1425	2.237	0.0180843	1.16157	1.7427
NP_723952.1	Ca-alpha1D	Ca[2+]-channel protein alpha[[1]] subunit D, isoform C [Drosophila melanogaster]	11	2552	2.589	0.0187374	1.37239	1.72729
NP_610169.1	CG10417	uncharacterized protein Dmel_CG10417, isoform A [Drosophila melanogaster]	11	662	1.865	0.0190474	0.899176	1.72016
NP_001163746.1	scrib	scribbled, isoform L [Drosophila melanogaster]	11	2585	3.077	0.0195777	1.62152	1.70824
NP_611217.1	veil	veil, isoform A [Drosophila melanogaster]	11	599	0.372	0.0214787	-1.42663	1.66799
NP_001260514.1	Cyt-b5-r	cytochrome b5-related, isoform B [Drosophila melanogaster]	11	436	1.961	0.0239528	0.97159	1.62064
NP_001284806.1	Cyp4d2	cytochrome P450-4d2, isoform B [Drosophila melanogaster]	11	501	2.045	0.0248939	1.0321	1.60391
NP_573385.1	ND-18	NADH dehydrogenase (ubiquinone) 18 kDa subunit [Drosophila melanogaster]	11	183	0.354	0.0294422	-1.49818	1.53103
NP_724804.1	RpL31	ribosomal protein L31, isoform A [Drosophila melanogaster]	11	124	0.688	0.0319255	-0.53952	1.49586
NP_524363.3	mRpL9	mitochondrial ribosomal protein L9 [Drosophila melanogaster]	11	248	0.647	0.0369078	-0.628162	1.43288
NP_001262957.1	Dhap-at	dihydroxyacetone phosphate acyltransferase, isoform C [Drosophila melanogaster]	11	807	1.4	0.0380098	0.485427	1.4201
NP_001260638.1	CG9319	CG9319, isoform B [Drosophila melanogaster]	11	373	2.068	0.0424084	1.04824	1.37255
NP_729901.1	cmb	combover, isoform A [Drosophila melanogaster]	11	1657	2.662	0.0440492	1.41251	1.35606
NP_524109.2	Mipp1	multiple inositol polyphosphate phosphatase 1, isoform A [Drosophila melanogaster]	11	467	1.768	0.0467259	0.822118	1.33044
NP_611387.1	Jheh3	juvenile hormone epoxide hydrolase 3 [Drosophila melanogaster]	11	468	0.334	0.0554937	-1.58208	1.25576
NP_727689.1	Jafrac1	thioredoxin peroxidase 1, isoform B [Drosophila melanogaster]	11	194	1.431	0.0558956	0.517024	1.25262
NP_001247010.1	CG16817	uncharacterized protein Dmel_CG16817, isoform B [Drosophila melanogaster]	11	184	1.649	0.062295	0.721591	1.20555
NP_728141.1	wupA	wings up A, isoform A [Drosophila melanogaster]	11	208	2.02	0.0722186	1.01436	1.14135
NP_726315.1	CG13551	uncharacterized protein Dmel_CG13551, isoform B [Drosophila melanogaster]	11	107	0.21	0.0752469	-2.25154	1.12351
NP_477006.1	Cdc37	Cdc37 [Drosophila melanogaster]	11	389	1.585	0.0938772	0.664483	1.02744
NP_524557.1	Nlp	nucleoplasmin, isoform A [Drosophila melanogaster]	11	152	0.642	0.102376	-0.639355	0.989801
NP_609204.2	Ostgamma	oligosaccharide transferase gamma subunit [Drosophila melanogaster]	11	330	1.231	0.119953	0.299831	0.920987
NP_572487.3	PIP82	PIP82 [Drosophila melanogaster]	11	1195	2.209	0.127642	1.14339	0.894005
NP_001259569.1	HDAC6	histone deacetylase 6, isoform G [Drosophila melanogaster]	11	1179	1.489	0.130026	0.574344	0.88597
NP_523827.1	l(2)efl	lethal (2) essential for life, isoform A [Drosophila melanogaster]	11	187	1.964	0.135685	0.973795	0.867469
NP_524999.2	pins	partner of inscuteable [Drosophila melanogaster]	11	658	1.914	0.141759	0.936591	0.848448
NP_725047.2	CG30022	uncharacterized protein Dmel_CG30022 [Drosophila melanogaster]	11	279	0.829	0.145558	-0.270556	0.836964
NP_730944.2	Pi4KIIalpha	Pi4KIIalpha, isoform A [Drosophila melanogaster]	11	710	1.462	0.161439	0.547943	0.791992
NP_524655.1	Gk1	glycerol kinase 1, isoform A [Drosophila melanogaster]	11	538	0.691	0.164742	-0.533242	0.783196
NP_476687.1	Ptp61F	protein tyrosine phosphatase 61F, isoform A [Drosophila melanogaster]	11	548	1.196	0.165211	0.258217	0.781961
NP_611119.1	CG7997	CG7997, isoform A [Drosophila melanogaster]	11	417	1.501	0.181329	0.585924	0.741534
NP_001286002.1	tweek	tweek, isoform J [Drosophila melanogaster]	11	5150	1.354	0.202319	0.437228	0.693964
NP_651407.3	Npl4	nuclear protein localization 4, isoform A [Drosophila melanogaster]	11	652	1.303	0.205575	0.381837	0.68703
NP_730633.1	Syx7	syntaxin 7, isoform B [Drosophila melanogaster]	11	282	1.499	0.208418	0.584	0.681065
NP_001259536.2	CtsB1	cathepsin B1, isoform C [Drosophila melanogaster]	11	340	0.685	0.225568	-0.545824	0.646723
NP_996373.1	Gclc	Glutamate-cysteine ligase catalytic subunit, isoform B [Drosophila melanogaster]	11	717	1.349	0.24072	0.43189	0.618487
NP_731749.3	grsm	granny smith, isoform F [Drosophila melanogaster]	11	655	1.347	0.246741	0.42975	0.607759
NP_524808.3	Ef1beta	elongation factor 1 beta, isoform B [Drosophila melanogaster]	11	222	0.27	0.252623	-1.88897	0.597527
NP_731825.1	sqd	squid, isoform B [Drosophila melanogaster]	11	344	1.481	0.272447	0.566572	0.564717
NP_650565.2	CG10340	uncharacterized protein Dmel_CG10340 [Drosophila melanogaster]	11	278	0.725	0.325659	-0.463947	0.487237
NP_608688.3	Cyp309a1	Cyp309a1, isoform B [Drosophila melanogaster]	11	506	1.36	0.369367	0.443607	0.432542
NP_610093.1	CG9248	CG9248, isoform B [Drosophila melanogaster]	11	494	1.396	0.373185	0.481299	0.428075
NP_726109.1	HmgD	high mobility group protein D, isoform A [Drosophila melanogaster]	11	112	0.505	0.403084	-0.985645	0.394605
NP_649052.1	Cyp12c1	Cyp12c1, isoform A [Drosophila melanogaster]	11	524	0.684	0.404438	-0.547932	0.393148
NP_572750.3	rudhira	rudhira, isoform C [Drosophila melanogaster]	11	2075	1.445	0.423358	0.531069	0.373292
NP_477487.1	for	foraging, isoform A [Drosophila melanogaster]	11	1088	1.59	0.446479	0.669027	0.350199
NP_611659.2	Oatp58Dc	organic anion transporting polypeptide 58Dc, isoform A [Drosophila melanogaster]	11	789	1.156	0.470587	0.209141	0.32736
NP_524715.2	ScpX	sterol carrier protein X-related thiolase [Drosophila melanogaster]	11	544	1.606	0.478458	0.683472	0.320156
NP_727499.1	Ran	Ran, isoform B [Drosophila melanogaster]	11	216	1.143	0.48804	0.192825	0.311545
NP_572436.1	CG2254	CG2254 [Drosophila melanogaster]	11	320	0.915	0.501971	-0.128156	0.299321
NP_572160.1	CG2982	CG2982, isoform B [Drosophila melanogaster]	11	653	0.65	0.519301	-0.621488	0.284581
NP_572308.3	Rpt4	regulatory particle triple-A ATPase 4 [Drosophila melanogaster]	11	397	1.358	0.520268	0.441483	0.283773
NP_724342.1	His2B:CG17949	histone H2B [Drosophila melanogaster]	11	123	0.559	0.524643	-0.83908	0.280136
NP_788055.2	CG33090	uncharacterized protein Dmel_CG33090, isoform B [Drosophila melanogaster]	11	948	1.161	0.542875	0.215368	0.265301
NP_651646.2	CG14526	uncharacterized protein Dmel_CG14526 [Drosophila melanogaster]	11	707	1.247	0.543116	0.318461	0.265107
NP_723722.2	Pex19	peroxin 19, isoform C [Drosophila melanogaster]	11	292	0.658	0.559328	-0.603841	0.252333
NP_651120.1	CG6726	CG6726, isoform A [Drosophila melanogaster]	11	401	1.132	0.577904	0.178874	0.238144
NP_652013.1	cathD	cathD, isoform A [Drosophila melanogaster]	11	392	1.275	0.579578	0.350497	0.236888
NP_650257.1	pic	piccolo [Drosophila melanogaster]	11	1140	1.175	0.642064	0.232661	0.192422
NP_733314.1	Cad99C	cadherin 99C, isoform A [Drosophila melanogaster]	11	1706	0.824	0.666783	-0.279284	0.176015
NP_610724.1	CG8888	CG8888 [Drosophila melanogaster]	11	388	1.368	0.717311	0.452068	0.144293
NP_650584.1	Irc	Immune-regulated catalase, isoform A [Drosophila melanogaster]	11	697	1.146	0.724686	0.196607	0.13985
NP_523628.1	Cyp6a2	cytochrome P450-6a2 [Drosophila melanogaster]	11	506	1.202	0.730997	0.265437	0.136085
NP_524321.1	Ho	heme oxygenase [Drosophila melanogaster]	11	296	0.747	0.867475	-0.42082	0.0617429
NP_725602.1	CG30463	uncharacterized protein Dmel_CG30463, isoform A [Drosophila melanogaster]	11	650	1.134	0.898324	0.181421	0.0465672
NP_001247003.1	RhoL	Rho-like, isoform B [Drosophila melanogaster]	11	214	1.103	0.898999	0.141433	0.0462407
NP_609362.1	CG5676	CG5676 [Drosophila melanogaster]	11	156	0.866	0.934754	-0.207561	0.0293028
NP_649301.1	CG11309	uncharacterized protein Dmel_CG11309, isoform A [Drosophila melanogaster]	11	358	0.896	0.945985	-0.158429	0.0241156
NP_477046.1	Ance	angiotensin converting enzyme, isoform A [Drosophila melanogaster]	11	615	1.17	0.946746	0.226509	0.0237667
NP_001245944.1	Pp2A-29B	protein phosphatase 2A at 29B, isoform D [Drosophila melanogaster]	11	650	1.307	0.959164	0.386259	0.018107
NP_651954.3	RpL10	ribosomal protein L10, isoform C [Drosophila melanogaster]	11	218	0.923	0.962281	-0.115597	0.0166981
NP_001246914.1	Nep2	neprilysin 2, isoform B [Drosophila melanogaster]	11	774	0.916	0.965249	-0.12658	0.0153606
NP_996366.1	l(1)G0193	lethal (1) G0193, isoform B [Drosophila melanogaster]	11	646	1.079	0.975179	0.109695	0.0109158
NP_001260465.1	UK114	UK114, isoform B [Drosophila melanogaster]	11	138	1.224	0.975596	0.291604	0.01073
NP_524180.1	alphaSnap	alpha soluble NSF attachment protein [Drosophila melanogaster]	11	292	0.85	0.986896	-0.234465	0.00572871
NP_722796.1	Rab5	Rab5, isoform B [Drosophila melanogaster]	11	219	0.93	0.987868	-0.104697	0.00530104
NP_572304.5	CG3566	CG3566, isoform B [Drosophila melanogaster]	11	117	0.918	0.989765	-0.123434	0.00446782
NP_572420.1	spidey	spidey [Drosophila melanogaster]	11	321	0.93	0.992639	-0.104697	0.00320881
NP_001285541.1	CG13865	uncharacterized protein Dmel_CG13865, isoform C [Drosophila melanogaster]	11	266	1.118	0.99493	0.16092	0.00220735
NP_610831.1	CG13321	uncharacterized protein Dmel_CG13321, isoform A [Drosophila melanogaster]	11	286	0.908	0.996364	-0.139236	0.00158212
NP_001246053.1	ApepP	aminopeptidase P, isoform B [Drosophila melanogaster]	11	613	1.043	0.996825	0.0607392	0.00138099
NP_733060.1	PIG-S	phosphatidylinositol glycan anchor biosynthesis, class S [Drosophila melanogaster]	11	536	1.009	0.99996	0.0129262	1.75428e-05
NP_650062.1	scpr-A	SCP-containing protein A [Drosophila melanogaster]	10	264	12.234	9.73532e-05	3.61282	4.01165
NP_651435.1	CG5886	CG5886 [Drosophila melanogaster]	10	515	4.631	0.00014913	2.21132	3.82644
NP_723791.2	Pect	phosphoethanolamine cytidylyltransferase, isoform C [Drosophila melanogaster]	10	374	3.408	0.000222924	1.76893	3.65184
NP_001138101.1	CG31145	uncharacterized protein Dmel_CG31145, isoform C [Drosophila melanogaster]	10	980	4.12	0.000236558	2.04264	3.62606
NP_651592.2	mil	milkah [Drosophila melanogaster]	10	283	10.35	0.000255595	3.37156	3.59245
NP_733350.1	CG31030	uncharacterized protein Dmel_CG31030, isoform A [Drosophila melanogaster]	10	384	2.608	0.000272982	1.38294	3.56387
NP_648467.1	CG6140	CG6140, isoform A [Drosophila melanogaster]	10	470	4.282	0.000384785	2.09828	3.41478
NP_001287408.1	GluClalpha	GluClalpha, isoform N [Drosophila melanogaster]	10	463	1.901	0.000391212	0.926759	3.40759
NP_523893.1	mRpS35	mitochondrial ribosomal protein S35 [Drosophila melanogaster]	10	326	0.331	0.00105004	-1.5951	2.9788
NP_650338.1	twf	twinfilin [Drosophila melanogaster]	10	343	1.924	0.00116684	0.944109	2.93299
NP_477258.1	Idgf1	imaginal disc growth factor 1 [Drosophila melanogaster]	10	439	2.004	0.00143865	1.00288	2.84205
NP_609015.2	CG9498	CG9498 [Drosophila melanogaster]	10	424	0.221	0.00145662	-2.17788	2.83665
NP_001014659.1	slo	slowpoke, isoform I [Drosophila melanogaster]	10	1213	2.518	0.00153353	1.33228	2.81431
NP_611254.2	CG4984	CG4984, isoform A [Drosophila melanogaster]	10	440	1.858	0.00167348	0.893751	2.77638
NP_001033837.1	Cp7Fa	chorion protein a at 7F [Drosophila melanogaster]	10	293	0.122	0.00178555	-3.03505	2.74823
NP_649694.1	CG10098	uncharacterized protein Dmel_CG10098 [Drosophila melanogaster]	10	353	2.383	0.00197767	1.25278	2.70385
NP_524828.1	Cyp4p1	cytochrome P450-4p1 [Drosophila melanogaster]	10	513	0.28	0.00206277	-1.8365	2.68555
NP_651341.2	Clbn	caliban, isoform C [Drosophila melanogaster]	10	992	1.751	0.00263789	0.808179	2.57874
NP_650528.1	CG6126	CG6126 [Drosophila melanogaster]	10	555	2.464	0.00291065	1.301	2.53601
NP_608858.3	Clect27	C-type lectin 27kD, isoform A [Drosophila melanogaster]	10	231	2.455	0.00408367	1.29572	2.38895
NP_001260800.2	LRP1	LDL receptor protein 1, isoform F [Drosophila melanogaster]	10	4752	1.941	0.00425155	0.9568	2.37145
NP_572886.2	GstT4	glutathione S transferase T4 [Drosophila melanogaster]	10	237	0.65	0.00478213	-0.621488	2.32038
NP_001163133.1	CG44250	uncharacterized protein Dmel_CG44250, isoform C [Drosophila melanogaster]	10	297	0.558	0.00479729	-0.841663	2.319
NP_001247091.1	Abi	abelson interacting protein, isoform D [Drosophila melanogaster]	10	477	2.35	0.00491064	1.23266	2.30886
NP_524178.2	Clc	clathrin light chain, isoform A [Drosophila melanogaster]	10	219	3.987	0.00573197	1.9953	2.2417
NP_650086.2	Mrp4	multidrug resistance protein 4 [Drosophila melanogaster]	10	1316	2.027	0.00596488	1.01935	2.2244
NP_524545.2	Pkc98E	protein C kinase 98E, isoform A [Drosophila melanogaster]	10	739	1.811	0.00710519	0.856787	2.14842
NP_730777.1	ND-MLRQ	NADH dehydrogenase (ubiquinone) MLRQ subunit, isoform A [Drosophila melanogaster]	10	83	0.195	0.00740138	-2.35845	2.13069
NP_787975.1	CG15630	uncharacterized protein Dmel_CG15630 [Drosophila melanogaster]	10	450	2.222	0.00782534	1.15186	2.1065
NP_733100.1	CG31087	uncharacterized protein Dmel_CG31087, isoform A [Drosophila melanogaster]	10	417	0.249	0.010355	-2.00578	1.98485
NP_524120.1	TSG101	tumor susceptibility gene 101 [Drosophila melanogaster]	10	408	1.695	0.0143179	0.761285	1.84412
NP_728809.1	prominin-like	prominin-like, isoform A [Drosophila melanogaster]	10	1013	1.485	0.0150057	0.570463	1.82374
NP_732033.1	Atx2	Ataxin-2, isoform B [Drosophila melanogaster]	10	1084	2.141	0.0158545	1.09828	1.79985
NP_649451.1	Vps24	vacuolar protein sorting 24, isoform A [Drosophila melanogaster]	10	223	2.058	0.0172579	1.04124	1.76301
NP_599139.1	Nacalpha	nascent polypeptide associated complex protein alpha subunit, isoform A [Drosophila melanogaster]	10	217	1.598	0.0191667	0.676267	1.71745
NP_569951.1	Pgam5	phosphoglycerate mutase 5, isoform A [Drosophila melanogaster]	10	289	0.741	0.0202931	-0.432455	1.69265
NP_001261794.1	Syx13	syntaxin 13, isoform B [Drosophila melanogaster]	10	284	1.895	0.0206386	0.922198	1.68532
NP_726463.1	ATPsynF	ATP synthase, subunit F, isoform A [Drosophila melanogaster]	10	107	0.158	0.0220699	-2.662	1.6562
NP_651960.2	trio	trio, isoform A [Drosophila melanogaster]	10	2263	2.857	0.0240915	1.5145	1.61814
NP_001261952.1	mbf1	multiprotein bridging factor 1, isoform E [Drosophila melanogaster]	10	188	3.466	0.0259871	1.79327	1.58524
NP_476699.1	Ras85D	Ras oncogene at 85D [Drosophila melanogaster]	10	189	1.548	0.0272578	0.630405	1.56451
NP_652600.1	Alk	anaplastic lymphoma kinase, isoform A [Drosophila melanogaster]	10	1701	1.971	0.0304616	0.978928	1.51625
NP_001036319.2	stnB	stoned B, isoform E [Drosophila melanogaster]	10	1262	2.777	0.0318542	1.47353	1.49683
NP_608818.4	CG3714	CG3714, isoform B [Drosophila melanogaster]	10	667	2.031	0.0352119	1.02219	1.45331
NP_001246121.1	CG43346	uncharacterized protein Dmel_CG43346, isoform A [Drosophila melanogaster]	10	150	0.415	0.0376858	-1.26882	1.42382
NP_610541.1	Adam	adam, isoform A [Drosophila melanogaster]	10	236	1.682	0.0378558	0.750178	1.42187
NP_650918.1	AdSS	adenylosuccinate synthetase [Drosophila melanogaster]	10	447	1.474	0.0392952	0.559737	1.40566
NP_609645.2	CG9302	CG9302 [Drosophila melanogaster]	10	510	1.688	0.0425595	0.755315	1.371
NP_524543.1	Hrb98DE	heterogeneous nuclear ribonucleoprotein at 98DE, isoform B [Drosophila melanogaster]	10	365	1.846	0.043027	0.884403	1.36626
NP_611544.1	CG10527	uncharacterized protein Dmel_CG10527 [Drosophila melanogaster]	10	296	1.685	0.0456303	0.752749	1.34075
NP_572622.1	CG17841	uncharacterized protein Dmel_CG17841 [Drosophila melanogaster]	10	429	1.429	0.0464246	0.515006	1.33325
NP_573081.1	ArgRS	Arginyl-tRNA synthetase [Drosophila melanogaster]	10	665	1.293	0.0468605	0.370722	1.32919
NP_001246082.2	CG17323	uncharacterized protein Dmel_CG17323, isoform E [Drosophila melanogaster]	10	519	1.314	0.0470151	0.393965	1.32776
NP_649905.1	CG8199	CG8199 [Drosophila melanogaster]	10	439	0.58	0.0487991	-0.785875	1.31159
NP_995868.1	RhoGEF2	Rho guanine nucleotide exchange factor 2, isoform F [Drosophila melanogaster]	10	2559	2.069	0.0527967	1.04893	1.27739
NP_001262882.1	Hrd3	HMG-coA reductase degradation 3, isoform B [Drosophila melanogaster]	10	819	1.395	0.0627601	0.480265	1.20232
NP_524104.2	mRpS34	mitochondrial ribosomal protein S34 [Drosophila melanogaster]	10	188	0.499	0.0636689	-1.00289	1.19607
NP_726992.2	spoon	spoonbill, isoform C [Drosophila melanogaster]	10	607	1.847	0.0699114	0.885184	1.15545
NP_727371.1	CG9691	CG9691, isoform B [Drosophila melanogaster]	10	121	2.978	0.0710466	1.57434	1.14846
NP_610426.2	AIMP1	aaRS-interacting multifunctional protein 1 [Drosophila melanogaster]	10	323	1.442	0.0798802	0.528071	1.09756
NP_524339.1	Hsc70-2	heat shock protein cognate 2 [Drosophila melanogaster]	10	633	2.835	0.08307	1.50335	1.08056
NP_477004.5	ChAT	choline acetyltransferase, isoform A [Drosophila melanogaster]	10	721	1.496	0.0942549	0.58111	1.0257
NP_569913.1	Lrpprc2	Leucine-rich pentatricopeptide repeat containing 2 [Drosophila melanogaster]	10	1072	0.767	0.103364	-0.382702	0.985632
NP_001097928.1	LpR2	lipophorin receptor 2, isoform E [Drosophila melanogaster]	10	1064	1.4	0.109365	0.485427	0.96112
NP_001261925.1	Zn72D	Zinc-finger protein at 72D, isoform C [Drosophila melanogaster]	10	884	1.643	0.111639	0.716332	0.952183
NP_724594.1	CG30493	uncharacterized protein Dmel_CG30493 [Drosophila melanogaster]	10	326	0.534	0.122181	-0.905088	0.912996
NP_001261049.1	Mtap	methylthioadenosine phosphorylase, isoform B [Drosophila melanogaster]	10	360	1.451	0.151049	0.537048	0.820883
NP_727492.1	Klp10A	Kinesin-like protein at 10A, isoform C [Drosophila melanogaster]	10	805	1.387	0.151822	0.471968	0.818664
NP_611116.2	Nox	NADPH oxidase, isoform E [Drosophila melanogaster]	10	1340	1.33	0.163519	0.411426	0.786432
NP_001259877.1	cpb	capping protein beta, isoform B [Drosophila melanogaster]	10	276	1.435	0.176757	0.521051	0.752622
NP_727278.1	CG12065	uncharacterized protein Dmel_CG12065, isoform B [Drosophila melanogaster]	10	687	1.21	0.187365	0.275007	0.727312
NP_647985.1	Ppat-Dpck	bifunctional phosphopantetheine adenylyltransferase - Dephospho-CoA kinase [Drosophila melanogaster]	10	518	1.398	0.191888	0.483364	0.716953
NP_001245976.1	l(2)gd1	lethal (2) giant discs 1, isoform B [Drosophila melanogaster]	10	834	1.585	0.196494	0.664483	0.706651
NP_001285097.1	Ork1	open rectifier K[+] channel 1, isoform C [Drosophila melanogaster]	10	1019	0.721	0.199734	-0.471929	0.699548
NP_611000.2	Cyp6a23	Cyp6a23 [Drosophila melanogaster]	10	502	1.343	0.202951	0.425459	0.692608
NP_609930.4	CG31793	uncharacterized protein Dmel_CG31793, isoform A [Drosophila melanogaster]	10	1307	1.984	0.212491	0.988412	0.67266
NP_649857.1	CG11980	uncharacterized protein Dmel_CG11980, isoform C [Drosophila melanogaster]	10	359	0.796	0.215232	-0.32916	0.667093
NP_001262580.1	smp-30	senescence marker protein-30, isoform C [Drosophila melanogaster]	10	306	1.186	0.247214	0.246104	0.606927
NP_001163238.2	Sdc	syndecan, isoform J [Drosophila melanogaster]	10	495	1.477	0.266904	0.56267	0.573646
NP_650782.1	Cyp12a5	Cyp12a5 [Drosophila melanogaster]	10	536	0.492	0.294936	-1.02327	0.530273
NP_001245762.1	Cdc42	Cdc42, isoform C [Drosophila melanogaster]	10	191	1.298	0.318033	0.37629	0.497528
NP_731927.1	His4r	histone H4 replacement, isoform A [Drosophila melanogaster]	10	103	0.199	0.338405	-2.32916	0.470564
NP_648272.1	pix	pixie, isoform A [Drosophila melanogaster]	10	611	1.385	0.347627	0.469886	0.458887
NP_611352.1	Eip55E	Eip55E, isoform A [Drosophila melanogaster]	10	393	1.295	0.350383	0.372952	0.455457
NP_610284.1	p47	p47 [Drosophila melanogaster]	10	407	1.328	0.365244	0.409255	0.437417
NP_608375.1	CG9577	CG9577 [Drosophila melanogaster]	10	312	0.603	0.376983	-0.72977	0.423678
NP_787958.1	crq	croquemort, isoform B [Drosophila melanogaster]	10	491	1.146	0.391517	0.196607	0.407249
NP_572448.1	alpha-PheRS	Phenylalanyl-tRNA synthetase, alpha-subunit [Drosophila melanogaster]	10	498	1.269	0.397347	0.343692	0.40083
NP_651353.1	CG11851	uncharacterized protein Dmel_CG11851 [Drosophila melanogaster]	10	623	1.391	0.398316	0.476122	0.399772
NP_525092.1	Prosalpha4	proteasome alpha4 subunit [Drosophila melanogaster]	10	249	1.263	0.416809	0.336855	0.380063
NP_649242.1	CG4825	CG4825, isoform A [Drosophila melanogaster]	10	498	1.36	0.430567	0.443607	0.365959
NP_651924.2	Asator	asator, isoform D [Drosophila melanogaster]	10	1349	2.972	0.447304	1.57143	0.349397
NP_612043.1	Reg-2	rhythmically expressed gene 2 [Drosophila melanogaster]	10	260	1.249	0.447992	0.320773	0.34873
NP_001262890.1	CG13601	uncharacterized protein Dmel_CG13601, isoform B [Drosophila melanogaster]	10	277	0.592	0.484443	-0.756331	0.314757
NP_001162751.1	rdgB	retinal degeneration B, isoform H [Drosophila melanogaster]	10	1263	1.815	0.488636	0.85997	0.311014
NP_731699.2	CG10097	uncharacterized protein Dmel_CG10097, isoform C [Drosophila melanogaster]	10	501	0.739	0.507015	-0.436354	0.294979
NP_524756.2	Uba2	ubiquitin activating enzyme 2 [Drosophila melanogaster]	10	700	1.187	0.569102	0.24732	0.24481
NP_001284863.1	CG11444	uncharacterized protein Dmel_CG11444, isoform B [Drosophila melanogaster]	10	215	1.543	0.594385	0.625738	0.225932
NP_525065.1	cib	ciboulot, isoform B [Drosophila melanogaster]	10	129	0.633	0.629635	-0.659723	0.200911
NP_650867.1	CG5023	CG5023 [Drosophila melanogaster]	10	169	1.29	0.655869	0.367371	0.183183
NP_001246856.1	CG10565	uncharacterized protein Dmel_CG10565, isoform B [Drosophila melanogaster]	10	646	1.263	0.66865	0.336855	0.174801
NP_731544.1	RpS25	ribosomal protein S25, isoform B [Drosophila melanogaster]	10	117	1.275	0.675285	0.350497	0.170513
NP_523365.2	caz	cabeza, isoform B [Drosophila melanogaster]	10	399	1.391	0.687414	0.476122	0.162781
NP_612094.2	CG9149	CG9149 [Drosophila melanogaster]	10	392	1.338	0.710561	0.420078	0.148399
NP_001261143.1	asrij	asrij, isoform B [Drosophila melanogaster]	10	258	1.297	0.715913	0.375178	0.14514
NP_727150.1	Inx2	innexin 2, isoform B [Drosophila melanogaster]	10	367	0.644	0.776331	-0.634867	0.109953
NP_651417.1	RpL27	ribosomal protein L27, isoform A [Drosophila melanogaster]	10	135	1.121	0.78558	0.164786	0.104809
NP_609034.1	Sec61alpha	Sec61 alpha subunit, isoform A [Drosophila melanogaster]	10	476	0.773	0.80547	-0.37146	0.0939508
NP_572273.2	GAA1	glycosylphosphatidylinositol anchor attachment 1 [Drosophila melanogaster]	10	674	0.893	0.812854	-0.163268	0.0899876
NP_609916.5	CG10602	uncharacterized protein Dmel_CG10602, isoform F [Drosophila melanogaster]	10	684	1.163	0.831864	0.217851	0.0799477
NP_001260439.1	CG5945	CG5945, isoform B [Drosophila melanogaster]	10	250	0.849	0.834353	-0.236164	0.0786503
NP_573331.1	CG7280	CG7280 [Drosophila melanogaster]	10	573	0.877	0.857973	-0.189351	0.0665265
NP_726038.1	Pu	punch, isoform A [Drosophila melanogaster]	10	324	1.121	0.874007	0.164786	0.0584849
NP_524331.2	Arp1	Actin-related protein 1 [Drosophila melanogaster]	10	376	1.277	0.888339	0.352759	0.0514213
NP_725952.1	CG11200	carbonyl reductase, isoform A [Drosophila melanogaster]	10	355	0.857	0.896382	-0.222633	0.0475069
NP_610679.1	Tapdelta	Translocon-associated protein delta, isoform A [Drosophila melanogaster]	10	166	0.846	0.896656	-0.24127	0.0473741
NP_001036571.2	CG9380	CG9380, isoform G [Drosophila melanogaster]	10	850	0.863	0.897259	-0.212568	0.047082
NP_569856.2	CG5254	CG5254, isoform A [Drosophila melanogaster]	10	306	1.113	0.89974	0.154454	0.045883
NP_524314.2	Ugt35a	UDP-glycosyltransferase 35a [Drosophila melanogaster]	10	537	0.883	0.91877	-0.179515	0.0367931
NP_723332.1	Tg	transglutaminase, isoform B [Drosophila melanogaster]	10	768	0.917	0.919712	-0.125006	0.0363483
NP_725867.1	wbl	windbeutel, isoform A [Drosophila melanogaster]	10	257	1.275	0.928227	0.350497	0.0323456
NP_609688.3	CG16886	uncharacterized protein Dmel_CG16886, isoform A [Drosophila melanogaster]	10	373	1.136	0.93728	0.183963	0.0281306
NP_788752.2	Ppn	papilin, isoform E [Drosophila melanogaster]	10	2898	0.922	0.953051	-0.117161	0.020884
NP_729802.1	CG32103	uncharacterized protein Dmel_CG32103, isoform B [Drosophila melanogaster]	10	583	0.878	0.954812	-0.187707	0.020082
NP_724578.1	boca	boca [Drosophila melanogaster]	10	180	0.831	0.956526	-0.26708	0.0193033
NP_611385.1	Jheh1	juvenile hormone epoxide hydrolase 1 [Drosophila melanogaster]	10	474	0.853	0.957071	-0.229382	0.019056
NP_001261116.1	CG30389	uncharacterized protein Dmel_CG30389, isoform E [Drosophila melanogaster]	10	1037	1.113	0.971787	0.154454	0.0124289
NP_788678.1	Spn88Ea	serpin 88Ea, isoform B [Drosophila melanogaster]	10	427	1.073	0.973941	0.10165	0.0114674
NP_001188709.1	CG5171	CG5171, isoform D [Drosophila melanogaster]	10	296	1.055	0.977796	0.077243	0.00975187
NP_001284821.1	CG2841	CG2841, isoform F [Drosophila melanogaster]	10	1239	1.101	0.988989	0.138814	0.00480847
NP_001246525.1	Mtch	mitochondrial carrier homolog 1, isoform E [Drosophila melanogaster]	10	316	0.959	0.993565	-0.0603973	0.0028039
NP_536791.1	l(2)37Bb	lethal (2) 37Bb [Drosophila melanogaster]	10	515	0.956	0.994415	-0.0649175	0.00243252
NP_611751.1	l(2)k09913	lethal (2) k09913, isoform C [Drosophila melanogaster]	10	389	1.05	0.995223	0.0703893	0.0020798
NP_647875.1	Cpr64Ad	cuticular protein 64Ad [Drosophila melanogaster]	10	247	0.93	0.996099	-0.104697	0.00169759
NP_648091.1	RpL18	ribosomal protein L18, isoform A [Drosophila melanogaster]	10	188	0.958	0.997627	-0.0619024	0.00103162
NP_611660.1	CG5819	CG5819, isoform A [Drosophila melanogaster]	10	915	0.971	0.997676	-0.0424568	0.00101061
NP_524646.5	ras	raspberry, isoform E [Drosophila melanogaster]	10	537	1.023	0.997918	0.0328061	0.000905106
NP_001261269.1	nSyb	neuronal synaptobrevin, isoform J [Drosophila melanogaster]	10	206	1.057	0.999252	0.0799754	0.000325166
NP_477469.1	gammaSnap1	gamma soluble NSF attachment protein 1 [Drosophila melanogaster]	10	302	0.933	0.999454	-0.100051	0.00023732
NP_001285435.1	out	outsiders, isoform B [Drosophila melanogaster]	10	655	1.034	0.999634	0.0482362	0.000158821
NP_723361.1	Su(var)205	suppressor of variegation 205, isoform B [Drosophila melanogaster]	10	206	0.957	0.999833	-0.0634092	7.2631e-05
NP_524780.1	msk	moleskin [Drosophila melanogaster]	10	1049	0.984	0.999908	-0.0232698	3.97984e-05
NP_609588.1	CG6180	CG6180 [Drosophila melanogaster]	10	257	0.995	0.999993	-0.00723157	2.93394e-06
NP_610358.1	Obp44a	Odorant-binding protein 44a, isoform A [Drosophila melanogaster]	10	143	0.998	1	-0.00288828	0
NP_727921.1	ND-20	NADH dehydrogenase (ubiquinone) 20 kDa subunit, isoform B [Drosophila melanogaster]	9	221	0.332	5.18296e-05	-1.59074	4.28542
NP_650925.1	CG3822	CG3822 [Drosophila melanogaster]	9	853	1.889	0.000156341	0.917623	3.80593
NP_001285802.1	CG5390	CG5390, isoform B [Drosophila melanogaster]	9	406	2.253	0.000266327	1.17185	3.57458
NP_650042.2	CG4706	CG4706 [Drosophila melanogaster]	9	783	7.47	0.000282246	2.90111	3.54937
NP_610779.1	CG8834	CG8834 [Drosophila melanogaster]	9	535	0.249	0.000285075	-2.00578	3.54504
NP_650333.1	CG9920	CG9920 [Drosophila melanogaster]	9	102	5.982	0.000336486	2.58063	3.47303
NP_001245588.1	CG7766	CG7766, isoform H [Drosophila melanogaster]	9	1358	4.331	0.000344392	2.1147	3.46295
NP_001285556.1	Lsp1beta	larval serum protein 1 beta, isoform B [Drosophila melanogaster]	9	789	19.994	0.00035596	4.3215	3.4486
NP_611415.2	CG9416	CG9416, isoform A [Drosophila melanogaster]	9	861	3.106	0.000414371	1.63506	3.38261
NP_524953.1	Spn55B	serpin 55B [Drosophila melanogaster]	9	374	0.548	0.000505865	-0.867752	3.29597
NP_651683.1	Cyt-c1L	cytochrome c1-like [Drosophila melanogaster]	9	344	5.226	0.000587473	2.38571	3.23101
NP_477075.2	sw	short wing, isoform J [Drosophila melanogaster]	9	663	2.104	0.00103632	1.07313	2.9845
NP_001163513.1	CG2082	CG2082, isoform G [Drosophila melanogaster]	9	368	2.249	0.00122848	1.16928	2.91063
NP_996031.1	Pdxk	pyridoxal kinase [Drosophila melanogaster]	9	304	2.192	0.00173662	1.13225	2.7603
NP_001014703.1	CG33521	uncharacterized protein Dmel_CG33521, isoform A [Drosophila melanogaster]	9	663	6.746	0.00175899	2.75403	2.75474
NP_523570.3	yellow-c	yellow-c, isoform A [Drosophila melanogaster]	9	438	3.047	0.00183354	1.60739	2.73671
NP_723346.2	Bsg	basigin, isoform G [Drosophila melanogaster]	9	648	2.064	0.0018796	1.04544	2.72594
NP_648950.1	beg	bad egg [Drosophila melanogaster]	9	379	0.395	0.0024038	-1.34008	2.6191
NP_523829.2	l(2)not	lethal (2) neighbor of tid [Drosophila melanogaster]	9	510	1.572	0.00279098	0.652601	2.55424
NP_536787.1	cype	cyclope, isoform A [Drosophila melanogaster]	9	77	0.287	0.00280448	-1.80088	2.55215
NP_647746.1	AhcyL1	adenosylhomocysteinase like 1 [Drosophila melanogaster]	9	521	1.633	0.00292944	0.707525	2.53322
NP_731641.1	COX5A	cytochrome c oxidase subunit 5A, isoform B [Drosophila melanogaster]	9	149	0.211	0.00299678	-2.24469	2.52334
NP_620115.2	dmGlut	dietary and metabolic glutamate transporter [Drosophila melanogaster]	9	496	0.399	0.0034941	-1.32554	2.45666
NP_001303322.1	vas	vasa, isoform C [Drosophila melanogaster]	9	661	0.419	0.00349989	-1.25498	2.45595
NP_610220.1	CG15908	uncharacterized protein Dmel_CG15908 [Drosophila melanogaster]	9	156	0.273	0.00353594	-1.87303	2.45149
NP_725343.1	mRpL53	mitochondrial ribosomal protein L53 [Drosophila melanogaster]	9	155	0.5	0.00375876	-1	2.42495
NP_001246986.1	COX7A	cytochrome c oxidase subunit 7A, isoform B [Drosophila melanogaster]	9	98	0.471	0.00376814	-1.0862	2.42387
NP_001260087.1	CG4230	CG4230, isoform C [Drosophila melanogaster]	9	386	2.538	0.00418717	1.34369	2.37808
NP_001260019.1	tutl	turtle, isoform H [Drosophila melanogaster]	9	1533	2.295	0.00481767	1.19849	2.31716
NP_648657.1	Abp1	actin binding protein 1 [Drosophila melanogaster]	9	531	1.671	0.00531362	0.740712	2.27461
NP_609183.1	CG12375	uncharacterized protein Dmel_CG12375 [Drosophila melanogaster]	9	292	1.665	0.0060847	0.735522	2.21576
NP_001260368.1	SCAR	SCAR, isoform D [Drosophila melanogaster]	9	674	1.709	0.0066516	0.773152	2.17707
NP_611654.1	Alp2	alkaline phosphatase 2 [Drosophila melanogaster]	9	538	0.211	0.00691626	-2.24469	2.16013
NP_001260630.1	CG2493	CG2493, isoform B [Drosophila melanogaster]	9	475	1.401	0.0071227	0.486457	2.14736
NP_723454.1	Eaat1	excitatory amino acid transporter 1, isoform B [Drosophila melanogaster]	9	479	1.843	0.00791027	0.882056	2.10181
NP_731299.1	CG31100	uncharacterized protein Dmel_CG31100, isoform A [Drosophila melanogaster]	9	716	1.961	0.00811915	0.97159	2.09049
NP_650672.1	DNaseII	deoxyribonuclease II [Drosophila melanogaster]	9	366	2.879	0.00829765	1.52557	2.08104
NP_611694.2	Ugt58Fa	Ugt58Fa, isoform A [Drosophila melanogaster]	9	529	1.998	0.00884393	0.998557	2.05335
NP_650494.2	alpha-Man-IIb	alpha-Mannosidase class II b, isoform A [Drosophila melanogaster]	9	1249	2.32	0.00915737	1.21412	2.03823
NP_726318.1	roh	reduction of Rh1, isoform A [Drosophila melanogaster]	9	82	0.162	0.00957918	-2.62593	2.01867
NP_523931.1	Srp54k	signal recognition particle protein 54k [Drosophila melanogaster]	9	508	1.788	0.010149	0.838347	1.99357
NP_648358.2	Zasp67	Z band alternatively spliced PDZ-motif protein 67, isoform G [Drosophila melanogaster]	9	730	3.462	0.0103127	1.79161	1.98663
NP_651051.1	Pebp1	Phosphatidylethanolamine-binding protein 1 [Drosophila melanogaster]	9	176	0.095	0.0103327	-3.39593	1.98579
NP_649128.1	CG9231	CG9231, isoform A [Drosophila melanogaster]	9	125	0.442	0.0105778	-1.17788	1.97561
NP_001285678.1	COX5B	cytochrome c oxidase subunit 5B, isoform B [Drosophila melanogaster]	9	120	0.251	0.0123321	-1.99424	1.90896
NP_651140.1	CG4434	CG4434 [Drosophila melanogaster]	9	535	2.737	0.0133684	1.4526	1.87392
NP_608787.1	CG3213	CG3213 [Drosophila melanogaster]	9	676	2.606	0.013486	1.38184	1.87012
NP_651385.3	CG10562	uncharacterized protein Dmel_CG10562 [Drosophila melanogaster]	9	405	0.501	0.0138687	-0.997117	1.85797
NP_611771.1	RpL22-like	ribosomal protein L22-like [Drosophila melanogaster]	9	312	11.053	0.0148588	3.46637	1.82802
NP_728413.1	CG1486	CG1486, isoform B [Drosophila melanogaster]	9	852	1.415	0.0148774	0.500802	1.82747
NP_524939.1	mRpL4	mitochondrial ribosomal protein L4 [Drosophila melanogaster]	9	296	0.625	0.0165299	-0.678072	1.78173
NP_523831.1	Snap29	Synaptosomal-associated protein 29kDa [Drosophila melanogaster]	9	284	2.478	0.0167512	1.30918	1.77595
NP_611142.3	CG5089	CG5089 [Drosophila melanogaster]	9	436	8.656	0.0186586	3.1137	1.72912
NP_572631.3	nocte	no circadian temperature entrainment, isoform A [Drosophila melanogaster]	9	2309	1.32	0.0206129	0.400538	1.68586
NP_001303467.1	Ktl	Kctd12-like, isoform B [Drosophila melanogaster]	9	228	2.113	0.0208772	1.07929	1.68033
NP_511062.1	Spat	serine pyruvate aminotransferase [Drosophila melanogaster]	9	394	3.321	0.0214614	1.73162	1.66834
NP_476691.1	Prosalpha3	proteasome alpha3 subunit [Drosophila melanogaster]	9	264	1.506	0.0225655	0.590722	1.64655
NP_477451.1	Pfrx	6-phosphofructo-2-kinase, isoform G [Drosophila melanogaster]	9	716	1.526	0.0235069	0.609755	1.6288
NP_609040.1	CG9547	CG9547 [Drosophila melanogaster]	9	419	0.701	0.023581	-0.512514	1.62744
NP_610761.2	garz	gartenzwerg, isoform B [Drosophila melanogaster]	9	1983	2.291	0.0235992	1.19598	1.6271
NP_611642.2	GM130	golgi matrix protein 130 kD [Drosophila melanogaster]	9	795	1.637	0.0238637	0.711054	1.62226
NP_610780.1	CG8520	CG8520, isoform A [Drosophila melanogaster]	9	458	0.445	0.0250709	-1.16812	1.60083
NP_572580.1	CG1354	CG1354, isoform A [Drosophila melanogaster]	9	397	1.648	0.0259897	0.720716	1.5852
NP_609689.3	CG16885	uncharacterized protein Dmel_CG16885 [Drosophila melanogaster]	9	270	3.144	0.0262044	1.6526	1.58163
NP_648555.1	CAH2	carbonic anhydrase 2, isoform A [Drosophila melanogaster]	9	335	0.713	0.0290267	-0.488026	1.5372
NP_523968.1	Arp3	Actin-related protein 3, isoform A [Drosophila melanogaster]	9	418	1.286	0.030054	0.362891	1.5221
NP_648622.1	CG11267	uncharacterized protein Dmel_CG11267 [Drosophila melanogaster]	9	103	0.199	0.0311802	-2.32916	1.50612
NP_611176.1	AsnRS-m	Asparaginyl-tRNA synthetase, mitochondrial [Drosophila melanogaster]	9	460	0.762	0.0364363	-0.392137	1.43847
NP_477117.2	Cyp4e2	cytochrome P450-4e2, isoform A [Drosophila melanogaster]	9	526	1.324	0.036579	0.404903	1.43677
NP_476573.1	hook	hook [Drosophila melanogaster]	9	679	2.158	0.0372617	1.10969	1.42874
NP_001261167.1	Rpn8	regulatory particle non-ATPase 8, isoform B [Drosophila melanogaster]	9	358	2.02	0.0401237	1.01436	1.3966
NP_001261606.1	CG43783	uncharacterized protein Dmel_CG43783, isoform G [Drosophila melanogaster]	9	1248	2.352	0.0403175	1.23389	1.39451
NP_524537.1	mRpS22	mitochondrial ribosomal protein S22 [Drosophila melanogaster]	9	393	0.205	0.0451386	-2.2863	1.34545
NP_722590.2	Cda5	chitin deacetylase-like 5, isoform B [Drosophila melanogaster]	9	1998	2.754	0.0488892	1.46153	1.31079
NP_651968.1	Ref1	RNA and export factor binding protein 1 [Drosophila melanogaster]	9	266	1.721	0.049112	0.783247	1.30881
NP_477209.2	T3dh	type III alcohol dehydrogenase [Drosophila melanogaster]	9	464	1.631	0.0497833	0.705757	1.30292
NP_476857.1	Rap1	Rap1 GTPase, isoform A [Drosophila melanogaster]	9	184	1.573	0.0546921	0.653519	1.26208
NP_477334.2	Mct1	monocarboxylate transporter 1, isoform A [Drosophila melanogaster]	9	626	1.759	0.0580487	0.814755	1.23621
NP_649579.2	CG1236	CG1236 [Drosophila melanogaster]	9	347	1.801	0.060765	0.848798	1.21635
NP_730974.1	CG31548	uncharacterized protein Dmel_CG31548 [Drosophila melanogaster]	9	256	0.586	0.0708381	-0.771027	1.14973
NP_651974.1	eIF5B	eIF5B, isoform B [Drosophila melanogaster]	9	1144	1.553	0.0732225	0.635058	1.13536
NP_726437.2	CG3394	CG3394, isoform A [Drosophila melanogaster]	9	687	1.609	0.0735734	0.686164	1.13328
NP_648327.1	path	pathetic, isoform A [Drosophila melanogaster]	9	471	1.965	0.0807076	0.974529	1.09309
NP_001246792.1	CG45057	uncharacterized protein Dmel_CG45057, isoform B [Drosophila melanogaster]	9	192	2.592	0.0815842	1.37407	1.08839
NP_524298.1	Snap24	Synaptosomal-associated protein 24kDa [Drosophila melanogaster]	9	212	1.251	0.0816116	0.323082	1.08825
NP_523969.1	Nmt	N-myristoyl transferase [Drosophila melanogaster]	9	472	1.534	0.0819918	0.617298	1.08623
NP_610288.1	CG12736	uncharacterized protein Dmel_CG12736 [Drosophila melanogaster]	9	456	1.458	0.0834947	0.543991	1.07834
NP_572294.2	raptor	raptor, isoform B [Drosophila melanogaster]	9	1621	2.084	0.0873929	1.05936	1.05852
NP_477288.3	Nup154	nucleoporin 154kD, isoform C [Drosophila melanogaster]	9	1365	0.633	0.090964	-0.659723	1.04113
NP_001285142.1	sicily	severe impairment of CI with lengthened youth, isoform B [Drosophila melanogaster]	9	334	0.574	0.0973209	-0.800877	1.01179
NP_649051.3	Chmp1	charged multivesicular body protein 1, isoform A [Drosophila melanogaster]	9	203	1.941	0.100913	0.9568	0.996055
NP_723909.2	Cul3	cullin 3, isoform F [Drosophila melanogaster]	9	934	1.975	0.104572	0.981853	0.980583
NP_001285268.1	Ahcy	adenosylhomocysteinase, isoform C [Drosophila melanogaster]	9	432	0.777	0.106221	-0.364013	0.973788
NP_001284725.1	RhoGAP1A	Rho GTPase activating protein at 1A, isoform E [Drosophila melanogaster]	9	1404	1.913	0.11182	0.935837	0.95148
NP_610359.2	Lpin	lipin, isoform A [Drosophila melanogaster]	9	1089	2.914	0.122263	1.543	0.912705
NP_599137.1	Rab11	Rab11, isoform A [Drosophila melanogaster]	9	214	0.525	0.129013	-0.929611	0.889368
NP_650567.1	CG17560	uncharacterized protein Dmel_CG17560 [Drosophila melanogaster]	9	499	0.576	0.131538	-0.795859	0.880949
NP_652608.1	pont	pontin [Drosophila melanogaster]	9	456	1.519	0.134968	0.603122	0.869769
NP_001246058.1	Sgt	small glutamine-rich tetratricopeptide containing protein, isoform B [Drosophila melanogaster]	9	331	1.816	0.147765	0.860764	0.830429
NP_524674.1	Hex-C	hexokinase C [Drosophila melanogaster]	9	454	0.669	0.149604	-0.579922	0.825057
NP_620114.3	bur	burgundy, isoform B [Drosophila melanogaster]	9	683	1.495	0.150864	0.580145	0.821415
NP_001162828.1	Gyf	gigyf, isoform H [Drosophila melanogaster]	9	1574	1.726	0.153607	0.787432	0.813588
NP_725856.1	CG15111	uncharacterized protein Dmel_CG15111, isoform B [Drosophila melanogaster]	9	411	1.445	0.160357	0.531069	0.794913
NP_001287641.1	Tim17b	translocase of the inner mitochondrial membrane 17b, isoform B [Drosophila melanogaster]	9	173	1.415	0.185481	0.500802	0.731701
NP_610939.2	RpS23	ribosomal protein S23, isoform A [Drosophila melanogaster]	9	143	1.424	0.197193	0.509949	0.705109
NP_650142.1	Ect3	Ectoderm-expressed 3 [Drosophila melanogaster]	9	637	1.479	0.199459	0.564622	0.700147
NP_731635.2	ClC-a	chloride channel-a, isoform A [Drosophila melanogaster]	9	1176	1.457	0.201907	0.543001	0.694848
NP_729565.2	iPLA2-VIA	calcium-independent phospholipase A2 VIA, isoform B [Drosophila melanogaster]	9	887	1.464	0.206973	0.549916	0.684087
NP_610499.2	CG1814	CG1814, isoform A [Drosophila melanogaster]	9	548	0.764	0.244234	-0.388355	0.612194
NP_001036360.1	CG31731	uncharacterized protein Dmel_CG31731, isoform B [Drosophila melanogaster]	9	1597	1.669	0.250675	0.738984	0.60089
NP_001245917.1	Hrb27C	heterogeneous nuclear ribonucleoprotein at 27C, isoform F [Drosophila melanogaster]	9	421	1.598	0.251058	0.676267	0.600226
NP_001261081.1	CG15099	uncharacterized protein Dmel_CG15099, isoform B [Drosophila melanogaster]	9	2683	1.758	0.257838	0.813935	0.588654
NP_611370.2	Cyp12b2	Cyp12b2 [Drosophila melanogaster]	9	535	0.843	0.273577	-0.246395	0.562921
NP_001260291.1	numb	numb, isoform D [Drosophila melanogaster]	9	556	2.149	0.277323	1.10367	0.557013
NP_524966.1	EbpIII	ejaculatory bulb protein III, isoform A [Drosophila melanogaster]	9	126	0.349	0.280025	-1.5187	0.552803
NP_650287.3	GILT1	Gamma-interferon-inducible lysosomal thiol reductase 1 [Drosophila melanogaster]	9	250	1.197	0.28746	0.259423	0.541422
NP_001246677.1	CG43078	uncharacterized protein Dmel_CG43078, isoform G [Drosophila melanogaster]	9	2455	1.533	0.288698	0.616358	0.539556
NP_727931.1	Nipsnap	nipsnap, isoform A [Drosophila melanogaster]	9	273	0.596	0.299917	-0.746616	0.522998
NP_724022.2	CG13284	uncharacterized protein Dmel_CG13284, isoform B [Drosophila melanogaster]	9	339	0.543	0.306509	-0.880976	0.513557
NP_611180.1	CG8963	CG8963, isoform A [Drosophila melanogaster]	9	559	1.626	0.323991	0.701327	0.489467
NP_536784.1	clt	cricklet [Drosophila melanogaster]	9	562	0.777	0.347634	-0.364013	0.458877
NP_001284879.1	rg	rugose, isoform Q [Drosophila melanogaster]	9	3785	1.294	0.352248	0.371838	0.453152
NP_726114.1	LBR	lamin B receptor, isoform C [Drosophila melanogaster]	9	741	1.273	0.353106	0.348232	0.452094
NP_001284994.1	mahe	maheshvara, isoform C [Drosophila melanogaster]	9	945	1.293	0.353401	0.370722	0.451732
NP_732780.1	Gclm	Glutamate-cysteine ligase modifier subunit, isoform A [Drosophila melanogaster]	9	285	1.242	0.386997	0.312665	0.412292
NP_001285907.1	TM9SF4	transmembrane 9 superfamily protein member 4, isoform B [Drosophila melanogaster]	9	630	1.295	0.398546	0.372952	0.399522
NP_523428.1	dod	dodo [Drosophila melanogaster]	9	166	1.353	0.436704	0.436162	0.359813
NP_523411.1	Zw	zwischenferment, isoform A [Drosophila melanogaster]	9	524	1.344	0.450011	0.426533	0.346777
NP_001188689.2	RpL27A	ribosomal protein L27A, isoform C [Drosophila melanogaster]	9	149	1.234	0.469695	0.303342	0.328184
NP_524712.1	CG10939	uncharacterized protein Dmel_CG10939 [Drosophila melanogaster]	9	296	0.751	0.480951	-0.413115	0.317899
NP_572178.1	Torsin	torsin, isoform A [Drosophila melanogaster]	9	340	0.89	0.489664	-0.168123	0.310102
NP_729792.1	Adk1	adenylate kinase 1, isoform B [Drosophila melanogaster]	9	229	1.164	0.502956	0.219091	0.29847
NP_729400.1	Cpr66D	cuticular protein 66D [Drosophila melanogaster]	9	270	1.508	0.543457	0.592636	0.264835
NP_730282.1	Nedd4	Nedd4, isoform K [Drosophila melanogaster]	9	834	1.334	0.548329	0.415759	0.260959
NP_612081.1	CG9119	CG9119 [Drosophila melanogaster]	9	322	1.172	0.550722	0.228973	0.259068
NP_001285417.1	CG7332	CG7332, isoform B [Drosophila melanogaster]	9	560	1.285	0.568613	0.361768	0.245183
NP_608954.1	CG11147	uncharacterized protein Dmel_CG11147, isoform A [Drosophila melanogaster]	9	711	0.881	0.576994	-0.182786	0.238829
NP_573179.1	CG4928	CG4928, isoform B [Drosophila melanogaster]	9	538	1.349	0.578094	0.43189	0.238002
NP_001285040.1	SmydA-9	SET and MYND domain containing, arthropod-specific, member 9, isoform B [Drosophila melanogaster]	9	500	1.166	0.589174	0.221568	0.229756
NP_648776.1	CG7739	CG7739 [Drosophila melanogaster]	9	596	1.176	0.604761	0.233888	0.218416
NP_608934.1	CG7277	CG7277 [Drosophila melanogaster]	9	477	0.873	0.606435	-0.195946	0.217216
NP_001097501.1	Cip4	Cdc42-interacting protein 4, isoform B [Drosophila melanogaster]	9	665	0.814	0.6407	-0.296899	0.193345
NP_729808.1	CG10638	uncharacterized protein Dmel_CG10638, isoform A [Drosophila melanogaster]	9	317	0.842	0.643169	-0.248108	0.191675
NP_610317.1	CG1941	CG1941, isoform A [Drosophila melanogaster]	9	352	0.803	0.657661	-0.316528	0.181998
NP_647949.1	CG4611	CG4611 [Drosophila melanogaster]	9	703	1.191	0.677991	0.252173	0.168776
NP_788926.2	GSS	glutathione synthetase, isoform H [Drosophila melanogaster]	9	562	1.325	0.700793	0.405992	0.15441
NP_001303387.1	Nplp2	Neuropeptide-like precursor 2, isoform C [Drosophila melanogaster]	9	119	0.73	0.728757	-0.454032	0.137417
NP_996462.1	Gbeta13F	G protein beta-subunit 13F, isoform C [Drosophila melanogaster]	9	340	1.366	0.7456	0.449957	0.127494
NP_650279.1	Dic1	dicarboxylate carrier 1, isoform A [Drosophila melanogaster]	9	280	0.892	0.746509	-0.164884	0.126965
NP_611484.1	CG18067	uncharacterized protein Dmel_CG18067, isoform A [Drosophila melanogaster]	9	245	0.878	0.749923	-0.187707	0.124983
NP_609967.1	CG10237	uncharacterized protein Dmel_CG10237, isoform B [Drosophila melanogaster]	9	324	1.195	0.758387	0.257011	0.120109
NP_649908.1	CG9393	CG9393, isoform A [Drosophila melanogaster]	9	327	1.217	0.761076	0.283329	0.118572
NP_729480.1	eIF-4E	eukaryotic initiation factor 4E, isoform C [Drosophila melanogaster]	9	248	1.33	0.763096	0.411426	0.117421
NP_788413.4	Jheh2	juvenile hormone epoxide hydrolase 2, isoform D [Drosophila melanogaster]	9	463	1.397	0.781038	0.482332	0.107328
NP_723532.1	CG4908	CG4908, isoform B [Drosophila melanogaster]	9	431	0.906	0.783413	-0.142417	0.106009
NP_732717.1	Sar1	Secretion-associated Ras-related 1, isoform A [Drosophila melanogaster]	9	193	0.572	0.783507	-0.805913	0.105957
NP_651701.1	alph	alphabet, isoform E [Drosophila melanogaster]	9	374	1.179	0.789744	0.237564	0.102514
NP_525108.2	Gapdh1	glyceraldehyde 3 phosphate dehydrogenase 1, isoform A [Drosophila melanogaster]	9	332	1.258	0.801702	0.331132	0.0959869
NP_723137.1	eIF-4a	eukaryotic initiation factor 4a, isoform A [Drosophila melanogaster]	9	403	1.186	0.814038	0.246104	0.0893556
NP_650751.3	CG7718	CG7718 [Drosophila melanogaster]	9	494	0.802	0.81959	-0.318326	0.0864032
NP_001285723.1	Rack1	receptor of activated protein kinase C 1, isoform D [Drosophila melanogaster]	9	318	1.221	0.872602	0.288063	0.059184
NP_001162894.1	Kr-h2	kruppel homolog 2, isoform B [Drosophila melanogaster]	9	276	1.06	0.893964	0.0840643	0.04868
NP_727284.1	Ppt1	Palmitoyl-protein thioesterase 1, isoform A [Drosophila melanogaster]	9	314	1.183	0.918947	0.24245	0.0367097
NP_724017.1	mdy	midway, isoform C [Drosophila melanogaster]	9	565	1.104	0.92594	0.14274	0.033417
NP_001259623.1	CG9784	CG9784, isoform C [Drosophila melanogaster]	9	519	1.129	0.933689	0.175045	0.0297978
NP_610737.1	EndoG	endonuclease G [Drosophila melanogaster]	9	310	0.87	0.940716	-0.200913	0.0265416
NP_649021.1	CG5506	CG5506 [Drosophila melanogaster]	9	180	0.892	0.942343	-0.164884	0.0257909
NP_001247074.1	CG14742	uncharacterized protein Dmel_CG14742 [Drosophila melanogaster]	9	74	1.303	0.944085	0.381837	0.0249887
NP_609441.1	CG6415	CG6415 [Drosophila melanogaster]	9	405	0.927	0.959476	-0.109359	0.0179661
NP_649899.1	rump	rumpelstiltskin, isoform A [Drosophila melanogaster]	9	632	0.887	0.964191	-0.172994	0.0158371
NP_524472.1	Rab7	Rab7, isoform A [Drosophila melanogaster]	9	207	0.856	0.964401	-0.224317	0.0157423
NP_647745.1	Non2	novel nucleolar protein 2 [Drosophila melanogaster]	9	244	1.157	0.970833	0.210389	0.0128554
NP_001260992.1	row	relative of woc, isoform C [Drosophila melanogaster]	9	1301	1.185	0.974545	0.244887	0.0111979
NP_649527.1	CG11999	uncharacterized protein Dmel_CG11999 [Drosophila melanogaster]	9	216	1.183	0.986893	0.24245	0.00572982
NP_651873.3	CG1635	CG1635 [Drosophila melanogaster]	9	448	1.076	0.991051	0.105678	0.00390382
NP_649888.1	CG8132	CG8132 [Drosophila melanogaster]	9	283	1.029	0.991084	0.041243	0.00388936
NP_001245850.1	Bacc	bacchus, isoform C [Drosophila melanogaster]	9	152	1.111	0.994113	0.151859	0.00256427
NP_723693.2	Mal-B2	maltase B2, isoform D [Drosophila melanogaster]	9	564	1.051	0.994369	0.0717627	0.00245223
NP_651356.1	CG10420	uncharacterized protein Dmel_CG10420 [Drosophila melanogaster]	9	429	1.073	0.996551	0.10165	0.00150064
NP_610206.1	Cyp6w1	Cyp6w1, isoform A [Drosophila melanogaster]	9	514	0.942	0.997221	-0.086201	0.00120877
NP_477128.1	Nap1	nucleosome assembly protein 1, isoform A [Drosophila melanogaster]	9	370	0.959	0.997313	-0.0603973	0.00116834
NP_610183.1	CG7791	CG7791 [Drosophila melanogaster]	9	699	0.986	0.999596	-0.0203404	0.000175515
NP_726686.1	RpL36	ribosomal protein L36, isoform B [Drosophila melanogaster]	9	115	0.979	0.999923	-0.0306192	3.32869e-05
NP_650586.2	AdSL	adenylosuccinate lyase [Drosophila melanogaster]	9	481	0.982	0.999945	-0.0262051	2.38488e-05
242253868		trypsinogen precursor [Sus scrofa]	9	246	1.012	1	0.0172093	1.20861e-07
NP_572372.1	CG3040	CG3040 [Drosophila melanogaster]	9	238	0.999	1	-0.00144342	0
NP_001033803.3	PMCA	plasma membrane calcium ATPase, isoform J [Drosophila melanogaster]	8	1255	1.786	3.21231e-06	0.836732	5.49318
NP_729446.1	Argk	arginine kinase, isoform A [Drosophila melanogaster]	8	562	3.948	3.85604e-05	1.98112	4.41386
NP_610496.1	CG1809	CG1809 [Drosophila melanogaster]	8	515	0.123	6.16162e-05	-3.02327	4.21031
NP_001097246.3	clos	closca [Drosophila melanogaster]	8	1836	0.44	9.71179e-05	-1.18442	4.0127
NP_609971.1	CG13084	uncharacterized protein Dmel_CG13084 [Drosophila melanogaster]	8	454	0.135	0.000164799	-2.88897	3.78305
NP_524661.1	CdsA	CDP diglyceride synthetase, isoform A [Drosophila melanogaster]	8	447	1.839	0.00017275	0.878921	3.76258
NP_523980.1	Cp19	chorion protein 19 [Drosophila melanogaster]	8	173	0.06	0.000184816	-4.05889	3.73326
NP_572245.1	CG3160	CG3160 [Drosophila melanogaster]	8	980	1.719	0.000327897	0.78157	3.48426
NP_001097695.1	godzilla	godzilla E3 ubiquitin protein ligase, isoform D [Drosophila melanogaster]	8	536	1.434	0.000374978	0.520045	3.42599
NP_609690.1	CG16884	uncharacterized protein Dmel_CG16884 [Drosophila melanogaster]	8	277	3.118	0.000382355	1.64062	3.41753
NP_648394.1	S-Lap3	Sperm-Leucylaminopeptidase 3, isoform C [Drosophila melanogaster]	8	535	9.439	0.000382972	3.23863	3.41683
NP_650760.1	CG14291	uncharacterized protein Dmel_CG14291 [Drosophila melanogaster]	8	524	3.426	0.000636212	1.77653	3.1964
NP_001284789.1	Mur2B	mucin related 2B, isoform C [Drosophila melanogaster]	8	1795	0.03	0.000651711	-5.05889	3.18594
NP_723847.1	mRpS23	mitochondrial ribosomal protein S23 [Drosophila melanogaster]	8	189	0.474	0.000866819	-1.07704	3.06207
NP_525119.1	mRpS17	mitochondrial ribosomal protein S17 [Drosophila melanogaster]	8	155	0.433	0.00103683	-1.20756	2.98429
NP_651240.1	CG6356	CG6356 [Drosophila melanogaster]	8	570	2.788	0.00124241	1.47923	2.90574
NP_996085.2	CG17839	uncharacterized protein Dmel_CG17839, isoform B [Drosophila melanogaster]	8	1656	1.737	0.00131297	0.796598	2.88175
NP_725824.1	CG15093	uncharacterized protein Dmel_CG15093, isoform A [Drosophila melanogaster]	8	324	0.537	0.00140096	-0.897006	2.85358
NP_611134.1	loopin-1	loopin-1, isoform A [Drosophila melanogaster]	8	526	9.962	0.00154316	3.31644	2.81159
NP_723730.2	CG31760	uncharacterized protein Dmel_CG31760, isoform C [Drosophila melanogaster]	8	1093	2.405	0.00169914	1.26604	2.76977
NP_648068.1	CG10063	uncharacterized protein Dmel_CG10063 [Drosophila melanogaster]	8	212	6.413	0.00170415	2.681	2.76849
NP_001097287.1	Dyb	dystrobrevin, isoform F [Drosophila melanogaster]	8	816	3.048	0.00175639	1.60786	2.75538
NP_788610.1	mRpL47	mitochondrial ribosomal protein L47 [Drosophila melanogaster]	8	271	0.394	0.00207354	-1.34373	2.68329
NP_001260265.1	Sema1a	semaphorin 1a, isoform G [Drosophila melanogaster]	8	1131	2.463	0.00207617	1.30042	2.68274
NP_648108.1	CG14834	uncharacterized protein Dmel_CG14834 [Drosophila melanogaster]	8	407	0.191	0.00251646	-2.38836	2.59921
NP_001261800.1	CG14109	uncharacterized protein Dmel_CG14109, isoform B [Drosophila melanogaster]	8	243	3.803	0.00306406	1.92714	2.5137
NP_609357.2	Npc1a	Niemann-Pick type C-1a, isoform A [Drosophila melanogaster]	8	1287	1.645	0.00312728	0.718088	2.50483
NP_732020.2	CG5044	CG5044, isoform B [Drosophila melanogaster]	8	386	0.705	0.0034827	-0.504305	2.45808
NP_001246838.1	Ac76E	adenylyl cyclase 76E, isoform B [Drosophila melanogaster]	8	1312	3.913	0.00363156	1.96828	2.43991
NP_523947.2	ndl	nudel [Drosophila melanogaster]	8	2616	0.141	0.00408352	-2.82623	2.38897
NP_611691.1	bonsai	bonsai [Drosophila melanogaster]	8	280	0.459	0.00422189	-1.12343	2.37449
NP_001285787.1	CG13126	uncharacterized protein Dmel_CG13126, isoform B [Drosophila melanogaster]	8	463	0.404	0.00426215	-1.30757	2.37037
NP_652729.2	HBS1	HBS1, isoform A [Drosophila melanogaster]	8	670	2.066	0.00444435	1.04684	2.35219
NP_609379.1	CG5381	CG5381, isoform A [Drosophila melanogaster]	8	686	2.973	0.00462357	1.57192	2.33502
NP_524134.1	mRpS26	mitochondrial ribosomal protein S26 [Drosophila melanogaster]	8	225	0.365	0.00475513	-1.45403	2.32284
NP_001027183.1	CG10096	uncharacterized protein Dmel_CG10096, isoform B [Drosophila melanogaster]	8	502	2.916	0.00513442	1.54399	2.28951
NP_647763.1	CG1271	CG1271, isoform A [Drosophila melanogaster]	8	556	1.853	0.00551039	0.889863	2.25882
NP_001259991.1	ND-B14.5B	NADH dehydrogenase (ubiquinone) B14.5 B subunit, isoform B [Drosophila melanogaster]	8	116	0.511	0.00561167	-0.968605	2.25091
NP_001036353.1	ATPsynG	ATP synthase, isoform B [Drosophila melanogaster]	8	99	0.461	0.00590698	-1.11716	2.22863
NP_476772.1	alphaTub84B	alpha-Tubulin at 84B [Drosophila melanogaster]	8	450	3.849	0.00602894	1.94448	2.21976
NP_651098.2	CG4721	CG4721 [Drosophila melanogaster]	8	686	1.553	0.00624408	0.635058	2.20453
NP_001259638.1	CG4991	CG4991, isoform D [Drosophila melanogaster]	8	496	0.223	0.00650553	-2.16488	2.18672
NP_610460.1	alc	alicorn, isoform A [Drosophila melanogaster]	8	341	2.717	0.00668454	1.44201	2.17493
NP_649675.2	CG1307	CG1307, isoform C [Drosophila melanogaster]	8	186	0.511	0.00805303	-0.968605	2.09404
NP_608729.1	CG8814	CG8814 [Drosophila melanogaster]	8	324	3.324	0.00813807	1.73292	2.08948
NP_649979.1	CG3940	CG3940, isoform A [Drosophila melanogaster]	8	304	1.835	0.00845696	0.87578	2.07279
NP_651792.1	CG15534	uncharacterized protein Dmel_CG15534 [Drosophila melanogaster]	8	666	0.25	0.00854572	-2	2.06825
NP_611666.2	CG13506	uncharacterized protein Dmel_CG13506, isoform A [Drosophila melanogaster]	8	503	2.357	0.00857816	1.23695	2.06661
NP_723014.1	tank	tank, isoform B [Drosophila melanogaster]	8	497	2.304	0.00911702	1.20414	2.04015
NP_651188.1	eIF4G2	eukaryotic translation initiation factor 4G2, isoform A [Drosophila melanogaster]	8	2072	2.318	0.0091435	1.21288	2.03889
NP_001260531.1	BicD	bicaudal D, isoform D [Drosophila melanogaster]	8	802	1.323	0.00932588	0.403813	2.03031
NP_001260321.1	Usp14	ubiquitin specific protease 14, isoform B [Drosophila melanogaster]	8	475	2.143	0.00944818	1.09963	2.02465
NP_001261020.1	Asph	aspartyl beta-hydroxylase, isoform L [Drosophila melanogaster]	8	991	2.178	0.0100374	1.123	1.99838
NP_647887.1	CG1316	CG1316 [Drosophila melanogaster]	8	470	2.692	0.0106231	1.42868	1.97375
NP_611983.2	Tina-1	troponin C-akin-1, isoform A [Drosophila melanogaster]	8	167	0.609	0.0106865	-0.715486	1.97116
NP_523713.2	Lac	lachesin [Drosophila melanogaster]	8	359	2.161	0.0107243	1.1117	1.96963
NP_523810.2	qkr58E-2	quaking related 58E-2, isoform A [Drosophila melanogaster]	8	416	2.584	0.0115885	1.36961	1.93597
NP_001036652.1	mRpS5	mitochondrial ribosomal protein S5, isoform C [Drosophila melanogaster]	8	407	0.446	0.0123276	-1.16488	1.90912
NP_001303469.1	CG11035	uncharacterized protein Dmel_CG11035, isoform B [Drosophila melanogaster]	8	231	0.308	0.0128758	-1.699	1.89022
NP_611299.2	CG10915	uncharacterized protein Dmel_CG10915, isoform A [Drosophila melanogaster]	8	609	2.514	0.0145946	1.32998	1.83581
NP_524156.1	rept	reptin, isoform A [Drosophila melanogaster]	8	481	1.373	0.0146594	0.457332	1.83388
NP_730917.1	CG31538	uncharacterized protein Dmel_CG31538 [Drosophila melanogaster]	8	563	10.86	0.0151532	3.44095	1.81949
NP_730363.2	Indy	I'm not dead yet, isoform B [Drosophila melanogaster]	8	590	1.396	0.0155248	0.481299	1.80897
NP_001263001.1	sda	slamdance, isoform D [Drosophila melanogaster]	8	1194	2.158	0.016711	1.10969	1.777
NP_001097382.2	CG12484	uncharacterized protein Dmel_CG12484, isoform B [Drosophila melanogaster]	8	1201	1.762	0.017141	0.817214	1.76596
NP_650221.1	CG6225	CG6225, isoform A [Drosophila melanogaster]	8	704	1.787	0.0172792	0.83754	1.76248
NP_722657.1	dock	dreadlocks, isoform B [Drosophila melanogaster]	8	548	2.135	0.0183691	1.09424	1.73591
NP_001260353.1	CG6094	CG6094, isoform B [Drosophila melanogaster]	8	203	0.533	0.0197758	-0.907793	1.70387
NP_001284997.1	mys	myospheroid, isoform B [Drosophila melanogaster]	8	846	1.802	0.0198691	0.849599	1.70182
NP_731377.1	Kap-alpha3	karyopherin alpha3, isoform A [Drosophila melanogaster]	8	514	1.818	0.0201634	0.862352	1.69544
NP_524956.2	Spn38F	serpin 38F, isoform A [Drosophila melanogaster]	8	372	2.574	0.0202003	1.36401	1.69464
NP_611967.1	TyrRS-m	Tyrosyl-tRNA synthetase, mitochondrial [Drosophila melanogaster]	8	464	0.512	0.0225415	-0.965784	1.64702
NP_572210.1	CG3323	CG3323 [Drosophila melanogaster]	8	749	3.499	0.0233438	1.80694	1.63183
NP_650939.2	RhoGAP93B	Rho GTPase activating protein at 93B [Drosophila melanogaster]	8	1330	2.201	0.0238863	1.13816	1.62185
NP_651048.1	Rpn7	regulatory particle non-ATPase 7 [Drosophila melanogaster]	8	389	1.811	0.0241259	0.856787	1.61752
NP_725367.1	CG8468	CG8468, isoform A [Drosophila melanogaster]	8	678	2.555	0.0248897	1.35332	1.60398
NP_727578.3	CG10353	uncharacterized protein Dmel_CG10353, isoform D [Drosophila melanogaster]	8	1029	2.01	0.0262979	1.0072	1.58008
NP_524427.1	r-l	rudimentary-like [Drosophila melanogaster]	8	493	0.68	0.026418	-0.556393	1.5781
NP_730765.1	slif	slimfast, isoform B [Drosophila melanogaster]	8	604	0.36	0.0302071	-1.47393	1.51989
NP_730713.1	Csp	cysteine string protein, isoform B [Drosophila melanogaster]	8	249	1.509	0.0305494	0.593593	1.515
NP_730938.1	CG31547	uncharacterized protein Dmel_CG31547, isoform B [Drosophila melanogaster]	8	1068	1.987	0.0331398	0.990592	1.47965
NP_572801.2	CG42258	uncharacterized protein Dmel_CG42258, isoform C [Drosophila melanogaster]	8	465	2.681	0.0333629	1.42277	1.47674
NP_611097.2	CG44243	uncharacterized protein Dmel_CG44243, isoform B [Drosophila melanogaster]	8	396	1.396	0.0335461	0.481299	1.47436
NP_609100.1	CG4495	CG4495, isoform A [Drosophila melanogaster]	8	524	1.296	0.0346235	0.374066	1.46063
NP_652042.1	ND-SGDH	NADH dehydrogenase (ubiquinone) SGDH subunit, isoform A [Drosophila melanogaster]	8	186	0.114	0.0366504	-3.13289	1.43592
NP_611346.1	CG5323	CG5323 [Drosophila melanogaster]	8	146	0.638	0.0406723	-0.648372	1.3907
NP_524730.1	Inx3	innexin 3, isoform A [Drosophila melanogaster]	8	395	1.332	0.0407485	0.413594	1.38989
NP_609847.1	CG6412	CG6412 [Drosophila melanogaster]	8	318	0.621	0.0412682	-0.687335	1.38438
NP_001259691.1	CG42450	uncharacterized protein Dmel_CG42450, isoform B [Drosophila melanogaster]	8	1280	1.986	0.0449143	0.989866	1.34762
NP_609558.3	atilla	atilla, isoform B [Drosophila melanogaster]	8	143	1.728	0.0465063	0.789103	1.33249
NP_609479.1	dUTPase	deoxyuridine triphosphatase, isoform A [Drosophila melanogaster]	8	188	0.313	0.0466475	-1.67577	1.33117
NP_609185.1	PAPLA1	phosphatidic acid phospholipase A1, isoform A [Drosophila melanogaster]	8	2016	1.964	0.047107	0.973795	1.32691
NP_727985.2	CanA-14F	calcineurin A at 14F, isoform A [Drosophila melanogaster]	8	584	2.161	0.0492407	1.1117	1.30768
NP_001261446.1	sif	still life, isoform J [Drosophila melanogaster]	8	2734	2.358	0.0517116	1.23756	1.28641
NP_651281.1	CG13630	uncharacterized protein Dmel_CG13630 [Drosophila melanogaster]	8	374	1.759	0.0544218	0.814755	1.26423
NP_649546.1	CG2519	CG2519, isoform A [Drosophila melanogaster]	8	1304	1.379	0.0578566	0.463622	1.23765
NP_001247284.1	crb	crumbs, isoform C [Drosophila melanogaster]	8	2253	1.448	0.0581146	0.534062	1.23571
NP_524318.1	mRpL40	mitochondrial ribosomal protein L40 [Drosophila melanogaster]	8	196	0.433	0.0604547	-1.20756	1.21857
NP_001246793.1	CG4729	CG4729, isoform E [Drosophila melanogaster]	8	397	1.27	0.0628214	0.344828	1.20189
NP_610953.1	CG8613	CG8613 [Drosophila melanogaster]	8	808	0.7	0.0639548	-0.514573	1.19413
NP_524612.2	faf	fat facets, isoform A [Drosophila melanogaster]	8	2778	2.789	0.0651539	1.47975	1.18606
NP_524436.2	InR	Insulin-like receptor, isoform A [Drosophila melanogaster]	8	2144	2.418	0.0689969	1.27381	1.16117
NP_609110.1	CG5149	CG5149 [Drosophila melanogaster]	8	448	0.674	0.0690614	-0.56918	1.16076
NP_652018.1	Cyp6a17	cytochrome P450-6a17, isoform A [Drosophila melanogaster]	8	501	2.104	0.0698764	1.07313	1.15567
NP_001260637.1	TM9SF2	transmembrane 9 superfamily protein member 2, isoform B [Drosophila melanogaster]	8	659	1.32	0.0699657	0.400538	1.15511
NP_001286215.1	Sec31	secretory 31, isoform D [Drosophila melanogaster]	8	1260	1.73	0.0706276	0.790772	1.15103
NP_001285346.1	CG9673	CG9673, isoform B [Drosophila melanogaster]	8	261	0.387	0.0710948	-1.36959	1.14816
NP_731527.1	Tpc1	thiamine pyrophosphate carrier protein 1, isoform B [Drosophila melanogaster]	8	332	1.645	0.0718871	0.718088	1.14335
NP_001261629.1	CG3529	CG3529, isoform C [Drosophila melanogaster]	8	526	1.587	0.0725556	0.666302	1.13933
NP_573082.1	CG8578	CG8578, isoform A [Drosophila melanogaster]	8	396	1.911	0.0770231	0.934328	1.11338
NP_609655.2	CG9267	CG9267 [Drosophila melanogaster]	8	371	1.723	0.0773661	0.784923	1.11145
NP_001261159.1	TM4SF	transmembrane 4 superfamily, isoform C [Drosophila melanogaster]	8	292	1.874	0.0777499	0.906121	1.1093
NP_542445.1	Gapdh2	glyceraldehyde 3 phosphate dehydrogenase 2, isoform A [Drosophila melanogaster]	8	332	1.428	0.0785011	0.513996	1.10512
NP_725521.1	CG8405	CG8405, isoform A [Drosophila melanogaster]	8	960	1.508	0.0789255	0.592636	1.10278
NP_524463.2	eIF-3p66	eukaryotic initiation factor 3 p66 subunit [Drosophila melanogaster]	8	560	1.413	0.0803382	0.498761	1.09508
NP_648605.1	CG10960	uncharacterized protein Dmel_CG10960, isoform B [Drosophila melanogaster]	8	539	1.269	0.0826228	0.343692	1.0829
NP_001246537.1	Gale	UDP-galactose 4'-epimerase, isoform B [Drosophila melanogaster]	8	350	2.05	0.0849099	1.03562	1.07104
NP_001014611.1	bocks	bocksbeutel, isoform B [Drosophila melanogaster]	8	399	2.316	0.0870768	1.21164	1.0601
NP_477067.2	Mtor	megator, isoform A [Drosophila melanogaster]	8	2346	1.528	0.0884109	0.611645	1.05349
NP_001036740.2	CG7956	CG7956, isoform F [Drosophila melanogaster]	8	1142	2.221	0.0912277	1.15121	1.03987
NP_995637.1	frj	farjavit, isoform B [Drosophila melanogaster]	8	489	1.412	0.0928193	0.49774	1.03236
NP_611080.1	casp	caspar, isoform A [Drosophila melanogaster]	8	695	1.313	0.0943985	0.392867	1.02504
NP_727914.1	CG8909	CG8909, isoform B [Drosophila melanogaster]	8	2009	1.581	0.0945846	0.660837	1.02418
NP_476750.1	sta	stubarista, isoform A [Drosophila melanogaster]	8	270	1.4	0.104078	0.485427	0.982641
NP_722974.1	l(2)k05819	lethal (2) k05819, isoform A [Drosophila melanogaster]	8	1449	1.482	0.116247	0.567545	0.934617
NP_652465.1	CG15210	uncharacterized protein Dmel_CG15210 [Drosophila melanogaster]	8	69	1.667	0.121497	0.737254	0.915436
NP_001027234.1	CG9510	CG9510, isoform B [Drosophila melanogaster]	8	469	1.654	0.123889	0.725959	0.906967
NP_609329.3	CG4619	CG4619, isoform A [Drosophila melanogaster]	8	570	0.567	0.124838	-0.818579	0.903652
NP_726830.1	CG32795	uncharacterized protein Dmel_CG32795, isoform A [Drosophila melanogaster]	8	387	1.135	0.129991	0.182692	0.886088
NP_610459.2	Hydr1	alpha/beta hydrolase 1, isoform A [Drosophila melanogaster]	8	525	1.181	0.133709	0.240009	0.87384
NP_733332.1	Acph-1	acid phosphatase 1, isoform B [Drosophila melanogaster]	8	455	0.632	0.137345	-0.662004	0.862186
NP_609486.2	Ge-1	Ge-1, isoform A [Drosophila melanogaster]	8	1354	1.828	0.147112	0.870266	0.832353
NP_001285012.1	sni	sniffer, isoform B [Drosophila melanogaster]	8	247	0.536	0.148636	-0.899695	0.827876
NP_609207.1	CG7806	CG7806 [Drosophila melanogaster]	8	1487	1.563	0.151568	0.644318	0.819391
NP_729266.2	lqf	liquid facets, isoform A [Drosophila melanogaster]	8	831	1.404	0.158388	0.489543	0.800278
NP_651928.1	CG1909	CG1909, isoform A [Drosophila melanogaster]	8	606	1.511	0.161554	0.595504	0.791681
NP_477437.1	Vha13	vacuolar H[+] ATPase 13kD subunit, isoform A [Drosophila melanogaster]	8	117	0.253	0.166702	-1.98279	0.77806
NP_001137904.1	CG7546	CG7546, isoform D [Drosophila melanogaster]	8	1346	1.57	0.187654	0.650765	0.726643
NP_647947.1	CHMP2B	charged multivesicular body protein 2b [Drosophila melanogaster]	8	212	1.855	0.188869	0.891419	0.723839
NP_523463.2	Prx6005	peroxiredoxin 6005 [Drosophila melanogaster]	8	222	1.249	0.191827	0.320773	0.717091
NP_524310.1	Fdh	formaldehyde dehydrogenase [Drosophila melanogaster]	8	379	1.46	0.2067	0.545968	0.684659
NP_733258.4	spg	sponge, isoform E [Drosophila melanogaster]	8	2187	1.505	0.207223	0.589763	0.683562
NP_650858.1	psidin	phagocyte signaling impaired [Drosophila melanogaster]	8	948	1.831	0.208369	0.872632	0.681167
NP_731644.2	CG6950	CG6950, isoform C [Drosophila melanogaster]	8	450	0.83	0.230579	-0.268817	0.637179
NP_001285233.1	AMPdeam	AMP deaminase, isoform K [Drosophila melanogaster]	8	798	1.28	0.237298	0.356144	0.624706
NP_788021.1	CG4658	CG4658, isoform B [Drosophila melanogaster]	8	526	1.327	0.258673	0.408168	0.58725
NP_649130.2	CG14100	uncharacterized protein Dmel_CG14100 [Drosophila melanogaster]	8	407	0.511	0.268757	-0.968605	0.57064
NP_610534.3	CG1513	CG1513, isoform A [Drosophila melanogaster]	8	784	1.523	0.274144	0.606916	0.562022
NP_649020.1	CG7408	CG7408, isoform B [Drosophila melanogaster]	8	585	0.769	0.278613	-0.378944	0.554998
NP_647747.1	CG12093	uncharacterized protein Dmel_CG12093 [Drosophila melanogaster]	8	380	0.743	0.281619	-0.428566	0.550338
NP_001014528.1	CG33506	uncharacterized protein Dmel_CG33506 [Drosophila melanogaster]	8	320	0.768	0.288915	-0.380822	0.53923
NP_001097755.1	GCC185	GRIP and coiled-coil domain containing 185 kDa [Drosophila melanogaster]	8	1135	1.716	0.289799	0.77905	0.537903
NP_651807.1	jdp	jdp, isoform A [Drosophila melanogaster]	8	195	1.967	0.302317	0.975997	0.519538
NP_611335.1	rswl	roswell [Drosophila melanogaster]	8	446	0.761	0.303087	-0.394032	0.518432
NP_524519.1	His2Av	histone H2A variant, isoform A [Drosophila melanogaster]	8	141	0.482	0.32441	-1.05289	0.488906
NP_001261089.1	CG10062	uncharacterized protein Dmel_CG10062, isoform C [Drosophila melanogaster]	8	868	1.185	0.339524	0.244887	0.46913
NP_651040.3	Nop56	Nop56 [Drosophila melanogaster]	8	496	0.792	0.341665	-0.336428	0.466399
NP_725374.1	SelD	Selenide,water dikinase, isoform A [Drosophila melanogaster]	8	398	1.297	0.347647	0.375178	0.458862
NP_001189169.1	tacc	transforming acidic coiled-coil protein, isoform K [Drosophila melanogaster]	8	1322	1.333	0.351984	0.414677	0.453477
NP_511106.1	Gip	GIP-like [Drosophila melanogaster]	8	264	0.677	0.37952	-0.562772	0.420765
NP_524421.1	RpS20	ribosomal protein S20 [Drosophila melanogaster]	8	120	1.285	0.383318	0.361768	0.416441
NP_723275.1	CG5973	CG5973, isoform A [Drosophila melanogaster]	8	311	0.479	0.388636	-1.0619	0.410456
NP_001097664.2	ArfGAP3	ADP-ribosylation factor GTPase activating protein 3, isoform H [Drosophila melanogaster]	8	553	1.746	0.404557	0.804054	0.39302
NP_536796.2	Rok	Rho kinase, isoform A [Drosophila melanogaster]	8	1390	1.403	0.408138	0.488515	0.389193
NP_648269.1	CG5653	CG5653 [Drosophila melanogaster]	8	476	1.248	0.420756	0.319618	0.37597
NP_723956.1	PRL-1	PRL-1 phosphatase, isoform A [Drosophila melanogaster]	8	176	1.252	0.423766	0.324235	0.372874
NP_001246225.1	ced-6	ced-6, isoform D [Drosophila melanogaster]	8	533	1.462	0.433406	0.547943	0.363105
NP_001303466.1	CG10407	uncharacterized protein Dmel_CG10407, isoform C [Drosophila melanogaster]	8	263	0.756	0.491961	-0.403542	0.308069
NP_001259751.2	CG1518	CG1518, isoform C [Drosophila melanogaster]	8	713	1.185	0.507475	0.244887	0.294586
NP_476753.1	Su(dx)	suppressor of deltex, isoform B [Drosophila melanogaster]	8	949	1.222	0.51423	0.289244	0.288843
NP_570080.1	VhaAC39-1	vacuolar H[+] ATPase AC39 subunit 1 [Drosophila melanogaster]	8	350	0.568	0.519262	-0.816037	0.284613
NP_609883.1	CG10211	uncharacterized protein Dmel_CG10211, isoform A [Drosophila melanogaster]	8	1394	1.384	0.522075	0.468844	0.282267
NP_649436.2	beta-Man	beta-Mannosidase, isoform A [Drosophila melanogaster]	8	908	0.732	0.54554	-0.450084	0.263174
NP_651323.3	bai	baiser [Drosophila melanogaster]	8	206	0.562	0.555699	-0.831358	0.255161
NP_733041.2	Saf-B	scaffold attachment factor B, isoform B [Drosophila melanogaster]	8	928	1.321	0.570351	0.40163	0.243858
NP_647847.1	Mul1	mitochondrial E3 ubiquitin protein ligase 1, isoform A [Drosophila melanogaster]	8	338	0.879	0.591375	-0.186065	0.228137
NP_001286055.1	CG10383	uncharacterized protein Dmel_CG10383, isoform B [Drosophila melanogaster]	8	784	0.874	0.60464	-0.194295	0.218503
NP_611991.1	CG2736	CG2736 [Drosophila melanogaster]	8	507	1.214	0.621543	0.279768	0.206529
NP_511124.1	RpII215	RNA polymerase II 215kD subunit [Drosophila melanogaster]	8	1887	0.794	0.623353	-0.332789	0.205266
NP_731993.1	eIF-2gamma	eukaryotic initiation factor 2gamma, isoform B [Drosophila melanogaster]	8	475	1.299	0.631305	0.377401	0.19976
NP_524652.1	syd	sunday driver, isoform A [Drosophila melanogaster]	8	1227	1.574	0.637696	0.654436	0.195386
NP_649000.1	CG7484	CG7484 [Drosophila melanogaster]	8	178	0.712	0.638015	-0.490051	0.195169
NP_650580.1	CG3678	CG3678, isoform A [Drosophila melanogaster]	8	282	0.533	0.645687	-0.907793	0.189978
NP_610818.1	mRpL18	mitochondrial ribosomal protein L18 [Drosophila melanogaster]	8	186	0.704	0.735393	-0.506353	0.13348
NP_001036265.1	LPCAT	lysophosphatidylcholine acyltransferase [Drosophila melanogaster]	8	533	1.24	0.757671	0.31034	0.120519
NP_730958.1	kra	krasavietz, isoform A [Drosophila melanogaster]	8	422	0.764	0.767873	-0.388355	0.114711
NP_729471.1	CG32039	uncharacterized protein Dmel_CG32039, isoform A [Drosophila melanogaster]	8	82	1.096	0.773912	0.132248	0.111309
NP_477054.1	RpL11	ribosomal protein L11, isoform A [Drosophila melanogaster]	8	184	1.085	0.776282	0.117695	0.10998
NP_651082.1	Cyp6d4	Cyp6d4 [Drosophila melanogaster]	8	515	0.795	0.776438	-0.330973	0.109893
NP_524373.1	mor	moira, isoform A [Drosophila melanogaster]	8	1209	1.427	0.846077	0.512985	0.0725903
NP_477090.1	Rab2	Rab2, isoform A [Drosophila melanogaster]	8	213	0.855	0.85545	-0.226004	0.0678052
NP_649540.1	POLDIP2	polymerase (DNA-directed), delta interacting protein 2, isoform A [Drosophila melanogaster]	8	410	1.081	0.862236	0.112367	0.0643738
NP_609709.1	mTTF	mitochondrial transcription termination factor [Drosophila melanogaster]	8	410	0.717	0.867815	-0.479955	0.0615727
NP_524728.2	eIF-1A	eukaryotic initiation factor 1A, isoform A [Drosophila melanogaster]	8	148	1.169	0.892011	0.225275	0.0496296
NP_728178.1	GalNAc-T2	UDP-N-acetyl-alpha-D-galactosamine:polypeptide N-acetylgalactosaminyltransferase 2, isoform B [Drosophila melanogaster]	8	591	1.082	0.892138	0.1137	0.0495682
NP_651825.4	dj-1beta	dj-1beta [Drosophila melanogaster]	8	187	1.147	0.893879	0.197865	0.0487212
NP_523792.2	FK506-bp2	FK506-binding protein 2 [Drosophila melanogaster]	8	108	1.33	0.895581	0.411426	0.047895
NP_001162808.1	GstT3	glutathione S transferase T3, isoform B [Drosophila melanogaster]	8	268	1.236	0.913656	0.305679	0.0392175
NP_001286264.1	CG1407	CG1407, isoform G [Drosophila melanogaster]	8	452	1.09	0.916587	0.124328	0.0378262
NP_001260614.1	CG10680	uncharacterized protein Dmel_CG10680, isoform B [Drosophila melanogaster]	8	251	1.215	0.922271	0.280956	0.0351415
NP_001188681.1	Uch	ubiquitin carboxy-terminal hydrolase, isoform B [Drosophila melanogaster]	8	227	0.841	0.931452	-0.249822	0.0308394
NP_001259531.1	CG11151	uncharacterized protein Dmel_CG11151, isoform B [Drosophila melanogaster]	8	115	0.754	0.940227	-0.407364	0.0267674
NP_648144.3	CG7506	CG7506 [Drosophila melanogaster]	8	236	0.868	0.960687	-0.204233	0.017418
NP_723156.1	stai	stathmin, isoform C [Drosophila melanogaster]	8	257	0.924	0.97017	-0.114035	0.0131523
NP_647749.2	pgant6	polypeptide GalNAc transferase 6, isoform A [Drosophila melanogaster]	8	666	0.906	0.981951	-0.142417	0.00791038
NP_476951.1	140up	upstream of RpII140, isoform A [Drosophila melanogaster]	8	261	1.034	0.984242	0.0482362	0.00689824
NP_651893.1	betaGlu	beta glucuronidase [Drosophila melanogaster]	8	686	0.938	0.985083	-0.0923402	0.00652698
NP_648779.1	CG16979	uncharacterized protein Dmel_CG16979 [Drosophila melanogaster]	8	607	1.154	0.985339	0.206643	0.00641447
NP_647932.1	LeuRS-m	Leucyl-tRNA synthetase, mitochondrial [Drosophila melanogaster]	8	869	0.934	0.986211	-0.0985055	0.00603037
NP_650741.1	CG7705	CG7705, isoform A [Drosophila melanogaster]	8	592	1.057	0.98938	0.0799754	0.00463685
NP_001247139.1	SF2	splicing factor 2, isoform B [Drosophila melanogaster]	8	255	1.079	0.992244	0.109695	0.00338135
NP_001245568.1	Rab39	Rab39, isoform B [Drosophila melanogaster]	8	218	1.044	0.993661	0.0621217	0.00276183
NP_524796.1	unc-45	uncoordinated 45, isoform A [Drosophila melanogaster]	8	947	0.927	0.993775	-0.109359	0.00271206
NP_650048.1	Tctp	translationally controlled tumor protein, isoform A [Drosophila melanogaster]	8	172	0.903	0.9957	-0.147202	0.00187167
NP_728041.3	CG45002	uncharacterized protein Dmel_CG45002, isoform E [Drosophila melanogaster]	8	1098	1.036	0.997702	0.051024	0.000999319
NP_728308.1	Nup205	nucleoporin 205kD, isoform B [Drosophila melanogaster]	8	2090	0.962	0.999134	-0.0558912	0.000376335
NP_525002.1	Jafrac2	thioredoxin peroxidase 2, isoform A [Drosophila melanogaster]	8	242	0.957	0.999143	-0.0634092	0.000372176
NP_001034042.1	GstD1	glutathione S transferase D1, isoform B [Drosophila melanogaster]	8	209	0.94	0.999728	-0.0892673	0.000118136
NP_724834.1	Prosalpha7	proteasome alpha7 subunit [Drosophila melanogaster]	8	253	1.034	0.999857	0.0482362	6.20792e-05
NP_727147.1	ogre	optic ganglion reduced, isoform B [Drosophila melanogaster]	8	362	0.979	0.999907	-0.0306192	4.02044e-05
NP_609912.1	CG17597	uncharacterized protein Dmel_CG17597, isoform A [Drosophila melanogaster]	8	407	1.026	0.999936	0.0370307	2.7735e-05
NP_610338.1	CG2915	CG2915, isoform A [Drosophila melanogaster]	8	453	0.992	0.99994	-0.011588	2.5917e-05
NP_649162.1	RhoGDI	RhoGDI, isoform A [Drosophila melanogaster]	8	201	1.003	0.99999	0.00432161	4.28935e-06
NP_477445.1	Manf	mesencephalic astrocyte-derived neurotrophic factor [Drosophila melanogaster]	8	173	1.03	0.999991	0.0426443	4.06677e-06
NP_788671.2	B52	B52, isoform M [Drosophila melanogaster]	8	355	1.007	1	0.0100637	1.9967e-07
NP_536744.2	mtSSB	mitochondrial single stranded DNA-binding protein [Drosophila melanogaster]	7	146	0.434	6.9958e-05	-1.20423	4.15516
NP_732572.1	Atpalpha	Na pump alpha subunit, isoform A [Drosophila melanogaster]	7	1041	1.477	0.00018551	0.56267	3.73163
NP_611805.1	levy	levy, isoform A [Drosophila melanogaster]	7	109	0.142	0.000215627	-2.81604	3.6663
NP_731114.2	Ama	amalgam, isoform B [Drosophila melanogaster]	7	341	3.173	0.000323189	1.66585	3.49054
NP_001163753.1	betaTub97EF	beta-Tubulin at 97EF, isoform B [Drosophila melanogaster]	7	457	2.819	0.000503689	1.49518	3.29784
NP_524351.1	mRpL11	mitochondrial ribosomal protein L11 [Drosophila melanogaster]	7	196	0.514	0.000541186	-0.96016	3.26665
NP_650774.1	NP15.6	NP15.6 [Drosophila melanogaster]	7	150	0.209	0.000629884	-2.25843	3.20074
NP_611658.3	Oatp58Db	organic anion transporting polypeptide 58Db [Drosophila melanogaster]	7	680	0.146	0.000683213	-2.77596	3.16544
NP_001285735.1	Wwox	WW domain containing oxidoreductase, isoform B [Drosophila melanogaster]	7	409	1.96	0.000824289	0.970854	3.08392
NP_611414.1	CG10051	uncharacterized protein Dmel_CG10051 [Drosophila melanogaster]	7	866	0.228	0.00085216	-2.13289	3.06948
NP_733175.1	CG6330	CG6330, isoform A [Drosophila melanogaster]	7	368	1.984	0.000942114	0.988412	3.0259
NP_609882.1	CG10178	uncharacterized protein Dmel_CG10178, isoform A [Drosophila melanogaster]	7	530	3.17	0.0011531	1.66448	2.93813
NP_650588.2	CG4009	CG4009, isoform B [Drosophila melanogaster]	7	649	0.226	0.00116055	-2.14561	2.93534
NP_001097732.1	CG12945	uncharacterized protein Dmel_CG12945, isoform B [Drosophila melanogaster]	7	449	4.589	0.00123737	2.19818	2.9075
NP_001097031.2	CG8028	CG8028, isoform C [Drosophila melanogaster]	7	563	2.918	0.00161623	1.54498	2.7915
NP_731459.2	Syn	synapsin, isoform D [Drosophila melanogaster]	7	1041	3.216	0.00195749	1.68527	2.7083
NP_001287562.1	Cyp6a18	Cyp6a18, isoform B [Drosophila melanogaster]	7	507	2.907	0.00197215	1.53953	2.70506
NP_001246623.1	mRpS6	mitochondrial ribosomal protein S6, isoform B [Drosophila melanogaster]	7	147	0.404	0.00244799	-1.30757	2.61119
NP_001246428.1	sm	smooth, isoform T [Drosophila melanogaster]	7	552	4.22	0.00255143	2.07724	2.59322
NP_525080.3	Crag	Calmodulin-binding protein related to a Rab3 GDP/GTP exchange protein, isoform A [Drosophila melanogaster]	7	1671	2.473	0.002792	1.30626	2.55408
NP_731505.1	fau	fau [Drosophila melanogaster]	7	131	4.299	0.00287423	2.104	2.54148
NP_001261233.1	Glut1	glucose transporter 1, isoform R [Drosophila melanogaster]	7	802	1.852	0.00316161	0.889084	2.50009
NP_001285060.1	CG3106	CG3106, isoform B [Drosophila melanogaster]	7	742	0.4	0.00386502	-1.32193	2.41285
NP_996490.1	CG9132	CG9132, isoform B [Drosophila melanogaster]	7	246	1.757	0.0039733	0.813114	2.40085
NP_573063.1	CG11679	uncharacterized protein Dmel_CG11679 [Drosophila melanogaster]	7	420	0.628	0.00431661	-0.671164	2.36486
NP_001262857.1	Cow	carrier of wingless, isoform E [Drosophila melanogaster]	7	632	2.826	0.00454554	1.49876	2.34241
NP_648092.1	mRpL50	mitochondrial ribosomal protein L50 [Drosophila melanogaster]	7	189	0.483	0.00472049	-1.0499	2.32601
NP_001287456.1	GABA-B-R2	metabotropic GABA-B receptor subtype 2, isoform C [Drosophila melanogaster]	7	1224	2.123	0.00474907	1.0861	2.32339
NP_726111.1	Tango11	transport and golgi organization 11, isoform A [Drosophila melanogaster]	7	277	3.099	0.00484619	1.6318	2.3146
NP_524851.1	nec	necrotic [Drosophila melanogaster]	7	476	1.456	0.00507132	0.54201	2.29488
NP_733394.3	CG31013	uncharacterized protein Dmel_CG31013 [Drosophila melanogaster]	7	534	4.475	0.00508153	2.16189	2.29401
NP_001036373.1	clumsy	clumsy, isoform B [Drosophila melanogaster]	7	1002	2.119	0.00622752	1.08338	2.20568
NP_524407.1	ninaE	neither inactivation nor afterpotential E [Drosophila melanogaster]	7	373	3.215	0.00641512	1.68482	2.1928
NP_611141.3	CG8303	CG8303, isoform C [Drosophila melanogaster]	7	543	0.52	0.00659175	-0.943416	2.181
NP_001246239.2	CAP	CAP, isoform X [Drosophila melanogaster]	7	2505	3.476	0.00707795	1.79743	2.15009
NP_001260501.1	Tpr2	tetratricopeptide repeat protein 2, isoform D [Drosophila melanogaster]	7	508	1.714	0.00729761	0.777367	2.13682
NP_001284773.1	CG12773	uncharacterized protein Dmel_CG12773, isoform C [Drosophila melanogaster]	7	712	2.045	0.0080558	1.0321	2.09389
NP_572162.2	CG3626	CG3626 [Drosophila melanogaster]	7	939	1.354	0.00813884	0.437228	2.08944
NP_609239.1	mRpL51	mitochondrial ribosomal protein L51 [Drosophila melanogaster]	7	174	0.415	0.00841736	-1.26882	2.07482
NP_001260032.1	dpy	dumpy, isoform Q [Drosophila melanogaster]	7	22949	6.576	0.00846927	2.71721	2.07215
NP_611762.1	Klp59D	Kinesin-like protein at 59D [Drosophila melanogaster]	7	729	7.641	0.00865645	2.93376	2.06266
NP_001262458.1	CG43143	uncharacterized protein Dmel_CG43143, isoform I [Drosophila melanogaster]	7	2556	3.35	0.00925375	1.74416	2.03368
NP_729748.3	CG42255	uncharacterized protein Dmel_CG42255 [Drosophila melanogaster]	7	3613	1.994	0.0093502	0.995665	2.02918
NP_650991.1	CG6656	CG6656 [Drosophila melanogaster]	7	395	1.682	0.00965422	0.750178	2.01528
NP_001259865.1	CG5397	CG5397, isoform B [Drosophila melanogaster]	7	665	2.057	0.00991569	1.04054	2.00368
NP_730347.1	CG32199	uncharacterized protein Dmel_CG32199 [Drosophila melanogaster]	7	509	2.581	0.0102661	1.36793	1.98859
NP_573098.1	eIF5	eIF5, isoform B [Drosophila melanogaster]	7	464	1.779	0.0118375	0.831067	1.92674
NP_610900.1	S-Lap7	Sperm-Leucylaminopeptidase 7, isoform A [Drosophila melanogaster]	7	527	6.331	0.0121369	2.66243	1.91589
NP_001137683.2	Ehbp1	Eps15 homology domain containing protein-binding protein 1, isoform I [Drosophila melanogaster]	7	994	2.597	0.0129908	1.37685	1.88636
NP_001262370.1	CG11737	uncharacterized protein Dmel_CG11737, isoform B [Drosophila melanogaster]	7	455	1.652	0.0132887	0.724214	1.87652
NP_651890.1	CG2187	CG2187, isoform A [Drosophila melanogaster]	7	623	2.619	0.0134208	1.38902	1.87222
NP_651754.1	CG7896	CG7896 [Drosophila melanogaster]	7	1392	2.923	0.0153065	1.54745	1.81512
NP_651455.1	Vps2	vacuolar protein sorting 2 [Drosophila melanogaster]	7	256	2.215	0.015758	1.14731	1.8025
YP_009047268.1	COX2	cytochrome c oxidase subunit II (mitochondrion) [Drosophila melanogaster]	7	228	0.24	0.0167314	-2.05889	1.77647
NP_001260684.1	CG42748	uncharacterized protein Dmel_CG42748, isoform K [Drosophila melanogaster]	7	2190	2.507	0.0177372	1.32596	1.75112
NP_001285613.1	ND-13A	NADH dehydrogenase (ubiquinone) 13 kDa A subunit, isoform B [Drosophila melanogaster]	7	126	0.164	0.0188585	-2.60823	1.72449
NP_001303417.1	CG11857	uncharacterized protein Dmel_CG11857, isoform C [Drosophila melanogaster]	7	265	1.65	0.0188827	0.722466	1.72393
NP_610351.1	CG11210	uncharacterized protein Dmel_CG11210 [Drosophila melanogaster]	7	760	1.773	0.0209391	0.826193	1.67904
NP_476942.1	cact	cactus, isoform B [Drosophila melanogaster]	7	500	3.367	0.0214077	1.75146	1.66943
NP_611539.1	cpa	capping protein alpha [Drosophila melanogaster]	7	286	1.767	0.0246376	0.821302	1.6084
NP_610562.1	mlt	mulet, isoform A [Drosophila melanogaster]	7	459	2.315	0.0246939	1.21101	1.60741
NP_001286252.1	Not1	Not1, isoform H [Drosophila melanogaster]	7	2511	2.273	0.0252881	1.1846	1.59708
NP_609024.1	CG42369	uncharacterized protein Dmel_CG42369 [Drosophila melanogaster]	7	401	2.333	0.0258349	1.22219	1.58779
NP_730949.2	CG12746	uncharacterized protein Dmel_CG12746, isoform B [Drosophila melanogaster]	7	363	1.43	0.026758	0.516015	1.57255
NP_001260005.1	CG43707	uncharacterized protein Dmel_CG43707, isoform E [Drosophila melanogaster]	7	2021	2.587	0.027962	1.37128	1.55343
NP_651755.2	CG7903	CG7903, isoform A [Drosophila melanogaster]	7	384	4.503	0.0288256	2.17089	1.54022
NP_651052.1	CG5377	CG5377 [Drosophila melanogaster]	7	278	0.662	0.0294957	-0.595097	1.53024
NP_649939.1	CG8412	CG8412 [Drosophila melanogaster]	7	678	2.026	0.0303014	1.01863	1.51854
NP_726548.1	CG31998	uncharacterized protein Dmel_CG31998, isoform A [Drosophila melanogaster]	7	1459	1.993	0.0341014	0.994942	1.46723
NP_001245829.1	Plap	phospholipase A2 activator protein, isoform B [Drosophila melanogaster]	7	787	1.687	0.0428501	0.75446	1.36805
NP_001247146.1	CG8907	CG8907, isoform B [Drosophila melanogaster]	7	732	0.689	0.0459765	-0.537424	1.33746
NP_649732.1	pyd3	pyd3 [Drosophila melanogaster]	7	386	1.838	0.0469105	0.878137	1.32873
NP_729087.1	Usp47	ubiquitin specific protease 47, isoform A [Drosophila melanogaster]	7	1556	2.006	0.0481194	1.00432	1.31768
NP_001097431.1	CG34423	uncharacterized protein Dmel_CG34423, isoform A [Drosophila melanogaster]	7	65	3.944	0.0508407	1.97966	1.29379
NP_001285457.1	Ubqn	ubiquilin, isoform B [Drosophila melanogaster]	7	547	1.446	0.05552	0.532068	1.25555
NP_477089.3	Ask1	apoptotic signal-regulating kinase 1, isoform C [Drosophila melanogaster]	7	1363	1.796	0.0557152	0.844787	1.25403
NP_001188957.1	CG44242	uncharacterized protein Dmel_CG44242, isoform B [Drosophila melanogaster]	7	80	0.442	0.0593691	-1.17788	1.22644
NP_649876.1	VhaM8.9	vacuolar H[+] ATPase M8.9 accessory subunit [Drosophila melanogaster]	7	320	1.311	0.0595502	0.390668	1.22512
NP_523419.1	Rab10	Rab10 [Drosophila melanogaster]	7	204	1.238	0.0606364	0.308011	1.21727
NP_649149.1	CG14103	uncharacterized protein Dmel_CG14103, isoform A [Drosophila melanogaster]	7	301	0.795	0.0630058	-0.330973	1.20062
NP_650740.1	CG7702	CG7702, isoform A [Drosophila melanogaster]	7	537	1.325	0.0660993	0.405992	1.1798
NP_647848.2	CG11594	uncharacterized protein Dmel_CG11594, isoform D [Drosophila melanogaster]	7	548	1.54	0.0699145	0.62293	1.15543
NP_001014591.1	Mi-2	Mi-2, isoform B [Drosophila melanogaster]	7	1983	1.522	0.0718186	0.605968	1.14376
NP_724133.1	CG17322	uncharacterized protein Dmel_CG17322, isoform A [Drosophila melanogaster]	7	517	0.466	0.0783517	-1.1016	1.10595
NP_001261571.1	Dscam4	down syndrome cell adhesion molecule 4, isoform I [Drosophila melanogaster]	7	1935	1.417	0.0813578	0.50284	1.0896
NP_648100.2	CG8607	CG8607 [Drosophila melanogaster]	7	275	0.319	0.0842732	-1.64837	1.07431
NP_001261538.1	CG44195	uncharacterized protein Dmel_CG44195 [Drosophila melanogaster]	7	694	2.111	0.0917066	1.07793	1.0376
NP_477122.1	Mlp84B	muscle LIM protein at 84B, isoform A [Drosophila melanogaster]	7	495	1.736	0.0919405	0.795767	1.03649
NP_723090.1	Hel25E	helicase at 25E, isoform B [Drosophila melanogaster]	7	424	1.451	0.103854	0.537048	0.983577
NP_728030.2	CG4829	CG4829, isoform B [Drosophila melanogaster]	7	822	1.348	0.105109	0.43082	0.978359
NP_572740.1	FucT6	alpha1,6-fucosyltransferase [Drosophila melanogaster]	7	619	1.606	0.107016	0.683472	0.970553
NP_001163095.1	Pkn	protein kinase N, isoform H [Drosophila melanogaster]	7	1284	2.121	0.107428	1.08474	0.968884
NP_524076.2	Prosbeta2	proteasome beta2 subunit [Drosophila melanogaster]	7	272	1.21	0.110154	0.275007	0.958002
NP_650383.2	BigH1	histone H1 variant BigH1 [Drosophila melanogaster]	7	353	0.401	0.111358	-1.31833	0.953279
NP_001137996.2	CG7414	CG7414, isoform D [Drosophila melanogaster]	7	638	1.376	0.116355	0.46048	0.934214
NP_650103.1	CG6830	CG6830 [Drosophila melanogaster]	7	891	0.756	0.123797	-0.403542	0.907288
NP_651867.2	PNPase	polynucleotide phosphorylase, isoform A [Drosophila melanogaster]	7	771	0.548	0.125469	-0.867752	0.901462
NP_995893.1	par-1	par-1, isoform H [Drosophila melanogaster]	7	993	2.999	0.126066	1.58448	0.899401
NP_001259918.1	Sec24CD	secretory 24CD, isoform C [Drosophila melanogaster]	7	1231	1.594	0.133288	0.672652	0.87521
NP_725691.1	eIF3-S9	eIF3-S9, isoform A [Drosophila melanogaster]	7	690	1.588	0.137037	0.667211	0.863162
NP_651850.1	CG1542	CG1542 [Drosophila melanogaster]	7	307	0.524	0.139029	-0.932361	0.856893
NP_476856.1	Cys	Cystatin-like [Drosophila melanogaster]	7	126	2.555	0.140002	1.35332	0.853864
NP_611243.1	P32	P32 [Drosophila melanogaster]	7	263	0.482	0.14065	-1.05289	0.851859
NP_608615.1	Rim2	replication in mitochondria 2, isoform A [Drosophila melanogaster]	7	365	1.342	0.143381	0.424385	0.843509
NP_523380.2	RSG7	regulator of G-protein signalling 7, isoform A [Drosophila melanogaster]	7	647	1.869	0.146212	0.902267	0.835018
NP_001259867.1	NLaz	neural lazarillo, isoform B [Drosophila melanogaster]	7	245	1.821	0.147054	0.864731	0.832523
NP_001259144.1	CG14812	uncharacterized protein Dmel_CG14812, isoform B [Drosophila melanogaster]	7	100	1.291	0.14885	0.368489	0.827253
NP_648302.2	CG4447	CG4447 [Drosophila melanogaster]	7	254	0.623	0.149734	-0.682696	0.824679
NP_001247267.1	mbc	myoblast city, isoform B [Drosophila melanogaster]	7	2008	2.535	0.160419	1.34199	0.794744
NP_536733.1	128up	upstream of RpIII128 [Drosophila melanogaster]	7	368	1.338	0.167868	0.420078	0.775031
NP_725019.1	Fbl6	F-box and leucine-rich repeat protein 6, isoform B [Drosophila melanogaster]	7	720	2.957	0.171092	1.56413	0.766771
NP_572568.1	RpS28b	ribosomal protein S28b, isoform A [Drosophila melanogaster]	7	65	1.833	0.172202	0.874207	0.763962
NP_648235.1	se	sepia [Drosophila melanogaster]	7	243	0.405	0.17503	-1.30401	0.756886
NP_572974.1	CG14407	uncharacterized protein Dmel_CG14407 [Drosophila melanogaster]	7	159	0.519	0.185929	-0.946194	0.730652
NP_650047.3	SdhC	succinate dehydrogenase, subunit C, isoform A [Drosophila melanogaster]	7	171	0.598	0.19574	-0.741783	0.708321
NP_611579.1	CG30394	uncharacterized protein Dmel_CG30394, isoform A [Drosophila melanogaster]	7	831	1.426	0.203193	0.511974	0.692091
NP_001014738.2	up	upheld, isoform K [Drosophila melanogaster]	7	396	1.59	0.220698	0.669027	0.656202
NP_651199.2	CG31140	uncharacterized protein Dmel_CG31140, isoform A [Drosophila melanogaster]	7	1564	1.837	0.228656	0.877352	0.640817
NP_650229.2	CG5999	CG5999 [Drosophila melanogaster]	7	530	1.732	0.228751	0.792439	0.640636
NP_477448.1	Stam	signal transducing adaptor molecule [Drosophila melanogaster]	7	689	1.979	0.247161	0.984772	0.60702
NP_650013.3	CG31272	uncharacterized protein Dmel_CG31272 [Drosophila melanogaster]	7	563	1.366	0.253661	0.449957	0.595746
NP_608715.2	Duox	dual oxidase, isoform B [Drosophila melanogaster]	7	1537	0.628	0.253778	-0.671164	0.595546
NP_477432.3	Taz	tafazzin, isoform A [Drosophila melanogaster]	7	378	1.219	0.253875	0.285698	0.59538
NP_572545.1	CG12121	uncharacterized protein Dmel_CG12121 [Drosophila melanogaster]	7	738	1.468	0.256236	0.553852	0.591361
NP_001260818.1	CG8080	CG8080, isoform E [Drosophila melanogaster]	7	413	1.301	0.259075	0.379621	0.586574
NP_523957.1	lark	lark, isoform A [Drosophila melanogaster]	7	352	1.415	0.262452	0.500802	0.58095
NP_001245827.1	CG3662	CG3662, isoform D [Drosophila melanogaster]	7	319	1.426	0.272023	0.511974	0.565394
NP_649898.1	CG8149	CG8149 [Drosophila melanogaster]	7	308	1.863	0.284716	0.897628	0.545588
NP_001286802.1	CG3860	CG3860, isoform B [Drosophila melanogaster]	7	457	1.514	0.290313	0.598365	0.537134
NP_001260332.1	CG5045	CG5045, isoform B [Drosophila melanogaster]	7	253	0.779	0.290401	-0.360305	0.537003
NP_610121.2	CG1416	CG1416, isoform A [Drosophila melanogaster]	7	354	1.537	0.328814	0.620117	0.48305
NP_649797.2	CG9684	CG9684 [Drosophila melanogaster]	7	642	1.475	0.342986	0.560715	0.464723
NP_611840.1	CG5569	CG5569 [Drosophila melanogaster]	7	196	0.544	0.346238	-0.878321	0.460625
NP_001285869.1	Rab6	Rab6, isoform B [Drosophila melanogaster]	7	208	0.535	0.360036	-0.902389	0.443654
NP_569844.2	CG3156	CG3156 [Drosophila melanogaster]	7	692	0.592	0.360523	-0.756331	0.443067
NP_476969.1	Vha14-1	vacuolar H[+] ATPase 14kD subunit 1 [Drosophila melanogaster]	7	124	0.701	0.383156	-0.512514	0.416624
NP_649677.1	Ccp84Ag	Ccp84Ag [Drosophila melanogaster]	7	191	0.73	0.385111	-0.454032	0.414414
NP_610228.1	CG3270	CG3270 [Drosophila melanogaster]	7	440	0.734	0.389517	-0.446148	0.409473
NP_649302.1	CG7632	CG7632, isoform A [Drosophila melanogaster]	7	330	1.317	0.402017	0.397255	0.395756
NP_649169.3	Tom20	translocase of outer membrane 20, isoform A [Drosophila melanogaster]	7	171	0.831	0.404143	-0.26708	0.393464
NP_732888.1	CG10254	uncharacterized protein Dmel_CG10254, isoform B [Drosophila melanogaster]	7	1398	0.691	0.414314	-0.533242	0.382671
NP_651966.2	Fad2	Fad2 [Drosophila melanogaster]	7	355	0.683	0.416734	-0.550043	0.380142
NP_724087.1	ninaD	neither inactivation nor afterpotential D, isoform A [Drosophila melanogaster]	7	513	2.013	0.425036	1.00935	0.371574
NP_651711.1	Obp99c	Odorant-binding protein 99c, isoform A [Drosophila melanogaster]	7	151	1.684	0.43177	0.751892	0.364747
NP_001285888.1	CG16826	uncharacterized protein Dmel_CG16826, isoform B [Drosophila melanogaster]	7	341	0.734	0.446917	-0.446148	0.349773
NP_724880.1	CG2269	CG2269, isoform B [Drosophila melanogaster]	7	783	1.622	0.455955	0.697774	0.341078
NP_524002.1	RpS17	ribosomal protein S17 [Drosophila melanogaster]	7	131	1.441	0.460518	0.52707	0.336753
NP_001303363.1	Fuca	alpha-L-fucosidase, isoform C [Drosophila melanogaster]	7	494	1.448	0.473682	0.534062	0.324513
NP_001027089.1	waw	waclaw [Drosophila melanogaster]	7	696	0.846	0.480598	-0.24127	0.318218
NP_649676.1	twr	twisted bristles roughened eye [Drosophila melanogaster]	7	185	0.534	0.480719	-0.905088	0.318109
NP_650054.2	CG17726	uncharacterized protein Dmel_CG17726 [Drosophila melanogaster]	7	437	0.698	0.493461	-0.518701	0.306747
NP_572495.1	Caf1-180	chromatin assembly factor 1, p180 subunit [Drosophila melanogaster]	7	1183	1.879	0.493835	0.909965	0.306418
NP_609822.1	CG12288	uncharacterized protein Dmel_CG12288 [Drosophila melanogaster]	7	435	0.695	0.50141	-0.524915	0.299807
NP_476761.3	awd	abnormal wing discs, isoform C [Drosophila melanogaster]	7	168	0.668	0.508761	-0.58208	0.293486
NP_649297.1	pzg	putzig, isoform A [Drosophila melanogaster]	7	996	1.451	0.531697	0.537048	0.274336
NP_523910.1	mge	maggie, isoform A [Drosophila melanogaster]	7	148	0.761	0.540285	-0.394032	0.267377
NP_648026.1	CG10467	uncharacterized protein Dmel_CG10467 [Drosophila melanogaster]	7	364	1.289	0.550544	0.366252	0.259208
NP_725114.1	RpS11	ribosomal protein S11, isoform C [Drosophila melanogaster]	7	155	1.221	0.554943	0.288063	0.255752
NP_610930.1	CysRS-m	Cysteinyl-tRNA synthetase, mitochondrial, isoform A [Drosophila melanogaster]	7	558	0.823	0.605137	-0.281036	0.218146
NP_477136.1	Ssb-c31a	single stranded-binding protein c31A [Drosophila melanogaster]	7	110	0.9	0.639659	-0.152003	0.194051
NP_649379.1	CG7133	CG7133 [Drosophila melanogaster]	7	353	0.805	0.662297	-0.312939	0.178947
NP_649745.3	ArgRS-m	Arginyl-tRNA synthetase, mitochondrial, isoform A [Drosophila melanogaster]	7	594	0.803	0.664916	-0.316528	0.177233
NP_650752.2	Epg5	ectopic P-granules autophagy protein 5, isoform C [Drosophila melanogaster]	7	2455	1.235	0.665025	0.304511	0.177162
NP_001260114.1	CG9044	CG9044, isoform C [Drosophila melanogaster]	7	1318	1.133	0.699036	0.180148	0.1555
NP_001262460.1	Bruce	BIR repeat containing ubiquitin-conjugating enzyme, isoform B [Drosophila melanogaster]	7	4976	1.272	0.703478	0.347099	0.15275
NP_477441.1	STUB1	STIP1 homology and U-box containing protein 1 [Drosophila melanogaster]	7	289	1.29	0.71202	0.367371	0.147508
NP_001015096.2	MFS17	major facilitator superfamily transporter 17, isoform F [Drosophila melanogaster]	7	505	1.238	0.712421	0.308011	0.147263
NP_001033939.2	Sod3	superoxide dismutase 3, isoform E [Drosophila melanogaster]	7	243	0.773	0.717598	-0.37146	0.144119
NP_524955.2	Spn42Da	serpin 42Da, isoform B [Drosophila melanogaster]	7	424	1.217	0.750864	0.283329	0.124439
NP_001259855.1	CG4577	CG4577, isoform B [Drosophila melanogaster]	7	446	1.446	0.783129	0.532068	0.106167
NP_649644.1	CG17919	uncharacterized protein Dmel_CG17919 [Drosophila melanogaster]	7	202	1.287	0.78553	0.364012	0.104837
NP_001303555.1	l(1)G0289	lethal (1) G0289, isoform B [Drosophila melanogaster]	7	625	1.134	0.787477	0.181421	0.103762
NP_477414.1	Ubc10	ubiquitin conjugating enzyme 10 [Drosophila melanogaster]	7	154	1.344	0.804035	0.426533	0.0947253
NP_650101.1	CG14715	uncharacterized protein Dmel_CG14715 [Drosophila melanogaster]	7	138	1.557	0.828372	0.638769	0.0817744
NP_610306.1	CG30491	uncharacterized protein Dmel_CG30491, isoform A [Drosophila melanogaster]	7	331	0.707	0.839014	-0.500218	0.0762309
NP_609051.1	CG11319	uncharacterized protein Dmel_CG11319, isoform A [Drosophila melanogaster]	7	935	0.918	0.861423	-0.123434	0.0647835
NP_573317.1	CG6659	CG6659, isoform A [Drosophila melanogaster]	7	872	1.116	0.865242	0.158337	0.0628625
NP_573125.1	CG4301	CG4301, isoform A [Drosophila melanogaster]	7	1342	0.879	0.876183	-0.186065	0.0574049
NP_569876.3	CG3690	CG3690, isoform A [Drosophila melanogaster]	7	558	1.374	0.88378	0.458382	0.0536558
NP_524113.1	Syx8	syntaxin 8 [Drosophila melanogaster]	7	232	0.824	0.901549	-0.279284	0.0450106
NP_001247005.1	SpdS	spermidine synthase, isoform C [Drosophila melanogaster]	7	287	1.145	0.90462	0.195348	0.0435339
NP_648997.1	Vps60	vacuolar protein sorting 60, isoform A [Drosophila melanogaster]	7	226	1.152	0.941057	0.204141	0.0263839
NP_001260143.1	Spn27A	serpin 27A, isoform B [Drosophila melanogaster]	7	447	1.272	0.94162	0.347099	0.0261243
NP_726804.1	CG3191	CG3191, isoform A [Drosophila melanogaster]	7	309	1.195	0.942223	0.257011	0.0258462
NP_652641.1	lectin-24Db	lectin-24Db [Drosophila melanogaster]	7	359	1.142	0.944231	0.191563	0.0249219
NP_609202.1	wol	wollknaeuel [Drosophila melanogaster]	7	326	0.936	0.945139	-0.0954196	0.0245044
NP_648553.1	CG5642	CG5642 [Drosophila melanogaster]	7	539	1.272	0.945842	0.347099	0.0241813
NP_649239.1	CG5059	CG5059, isoform A [Drosophila melanogaster]	7	201	0.901	0.956994	-0.150401	0.0190908
NP_001245715.1	Pp2B-14D	protein phosphatase 2B at 14D, isoform C [Drosophila melanogaster]	7	570	0.955	0.963744	-0.0664274	0.0160382
NP_996213.1	CG33331	uncharacterized protein Dmel_CG33331 [Drosophila melanogaster]	7	342	1.106	0.974348	0.145351	0.0112859
NP_477161.1	RpL9	ribosomal protein L9, isoform A [Drosophila melanogaster]	7	190	0.869	0.976912	-0.202572	0.0101446
NP_652037.1	Sec61beta	Sec61 beta subunit [Drosophila melanogaster]	7	100	0.898	0.981015	-0.155213	0.00832444
NP_651797.1	CDase	ceramidase, isoform A [Drosophila melanogaster]	7	704	1.081	0.981936	0.112367	0.00791697
NP_573229.1	CG8289	CG8289, isoform A [Drosophila melanogaster]	7	336	1.235	0.9828	0.304511	0.00753501
NP_524819.1	RpL12	ribosomal protein L12, isoform A [Drosophila melanogaster]	7	165	0.94	0.983639	-0.0892673	0.00716433
NP_728384.1	Cbs	cystathionine beta-synthase, isoform B [Drosophila melanogaster]	7	522	0.976	0.987472	-0.0350469	0.00547535
NP_001245456.1	TRAM	TRAM, isoform D [Drosophila melanogaster]	7	368	1.124	0.98925	0.168642	0.00469389
NP_648441.1	NaPi-III	Na[+]-dependent inorganic phosphate cotransporter type III, isoform A [Drosophila melanogaster]	7	667	0.947	0.990244	-0.0785637	0.0042579
NP_001287580.1	SP1029	SP1029, isoform E [Drosophila melanogaster]	7	932	0.946	0.991863	-0.0800879	0.00354845
NP_001097729.1	CG9471	CG9471, isoform B [Drosophila melanogaster]	7	204	0.893	0.994336	-0.163268	0.00246675
NP_569863.1	Sec22	secretory 22, isoform A [Drosophila melanogaster]	7	211	1.095	0.994455	0.130931	0.00241501
NP_001284862.1	CHOp24	CHOp24, isoform B [Drosophila melanogaster]	7	208	1.087	0.994917	0.120352	0.0022132
NP_572884.1	CG1673	CG1673 [Drosophila melanogaster]	7	443	1.063	0.995376	0.0881416	0.00201288
NP_610842.1	Spt-I	serine palmitoyltransferase subunit I, isoform A [Drosophila melanogaster]	7	468	1.022	0.996875	0.0313952	0.00135927
NP_001260309.1	CG5853	CG5853, isoform B [Drosophila melanogaster]	7	689	0.974	0.99861	-0.0380063	0.000604195
NP_523526.1	Trx-2	thioredoxin-2, isoform A [Drosophila melanogaster]	7	106	1.079	0.998798	0.109695	0.000522282
NP_652065.1	CG5707	CG5707, isoform A [Drosophila melanogaster]	7	357	1.055	0.998912	0.077243	0.000472787
NP_730923.1	Cerk	ceramide kinase, isoform A [Drosophila melanogaster]	7	687	0.969	0.998926	-0.0454314	0.000466628
NP_001285042.1	t	tan, isoform B [Drosophila melanogaster]	7	387	1.022	0.999097	0.0313952	0.000392304
NP_726048.1	MFS16	major facilitator superfamily transporter 16, isoform B [Drosophila melanogaster]	7	566	1.039	0.999633	0.0551957	0.000159305
NP_727690.1	RpS15Aa	ribosomal protein S15Aa, isoform A [Drosophila melanogaster]	7	130	1.005	0.999997	0.0071955	1.19891e-06
NP_649539.1	RpL35A	ribosomal protein L35A [Drosophila melanogaster]	7	157	0.995	1	-0.00723157	1.79006e-07
NP_726489.2	CG44247	uncharacterized protein Dmel_CG44247, isoform A [Drosophila melanogaster]	7	536	1.005	1	0.0071955	7.83172e-08
NP_524582.1	RpL32	ribosomal protein L32, isoform A [Drosophila melanogaster]	7	134	0.998	1	-0.00288828	4.6396e-09
NP_523835.2	Taldo	transaldolase [Drosophila melanogaster]	7	331	1.001	1	0.00144197	3.15457e-10
NP_651717.1	CG7601	CG7601 [Drosophila melanogaster]	6	326	2.421	3.3343e-05	1.2756	4.477
NP_001162703.1	Cp38	chorion protein 38, isoform B [Drosophila melanogaster]	6	306	0.065	8.59908e-05	-3.94342	4.06555
NP_001137817.1	Pde1c	phosphodiesterase 1c, isoform E [Drosophila melanogaster]	6	1173	3.538	0.000125157	1.82293	3.90254
NP_001303342.1	RanBPM	Ran-binding protein M, isoform G [Drosophila melanogaster]	6	1127	2.518	0.000189979	1.33228	3.72129
NP_572298.1	Btnd	biotinidase [Drosophila melanogaster]	6	553	0.169	0.000306889	-2.5649	3.51302
NP_612113.2	cue	cueball [Drosophila melanogaster]	6	644	0.337	0.00031079	-1.56918	3.50753
NP_523979.1	Cp15	chorion protein 15 [Drosophila melanogaster]	6	115	0.102	0.000370675	-3.29336	3.43101
NP_001033801.3	CG33978	uncharacterized protein Dmel_CG33978, isoform E [Drosophila melanogaster]	6	2289	2.905	0.000407827	1.53854	3.38952
NP_611667.1	babos	babos, isoform A [Drosophila melanogaster]	6	196	1.9	0.000492253	0.925999	3.30781
NP_648944.1	CG6664	CG6664, isoform A [Drosophila melanogaster]	6	532	2.812	0.000623219	1.4916	3.20536
NP_650256.2	CG7966	CG7966 [Drosophila melanogaster]	6	486	1.776	0.000840614	0.828632	3.0754
NP_001245936.1	Cka	connector of kinase to AP-1, isoform E [Drosophila melanogaster]	6	749	1.824	0.00085801	0.867106	3.06651
NP_648103.1	CG8602	CG8602, isoform A [Drosophila melanogaster]	6	478	1.918	0.000887073	0.939603	3.05204
NP_726473.2	Mmp1	matrix metalloproteinase 1, isoform C [Drosophila melanogaster]	6	584	2.204	0.00111154	1.14012	2.95407
NP_729966.1	CG7768	CG7768, isoform A [Drosophila melanogaster]	6	164	5.806	0.00117624	2.53754	2.92951
NP_650693.1	mTerf5	mitochondrial transcription termination factor 5 [Drosophila melanogaster]	6	560	0.576	0.00134398	-0.795859	2.87161
NP_610473.1	Cyp4p3	Cyp4p3 [Drosophila melanogaster]	6	515	2.17	0.00142812	1.1177	2.84523
NP_611429.1	CG11007	uncharacterized protein Dmel_CG11007, isoform A [Drosophila melanogaster]	6	271	1.762	0.0015544	0.817214	2.80844
NP_995727.1	CG13083	uncharacterized protein Dmel_CG13083 [Drosophila melanogaster]	6	316	0.134	0.00166967	-2.8997	2.77737
NP_001246128.1	nolo	no long nerve cord, isoform E [Drosophila melanogaster]	6	1394	1.463	0.00172888	0.54893	2.76224
NP_524290.2	betaTub85D	beta-Tubulin at 85D [Drosophila melanogaster]	6	446	4.15	0.00174096	2.05311	2.75921
NP_001260058.1	CG3036	CG3036, isoform B [Drosophila melanogaster]	6	493	2.259	0.00180752	1.17568	2.74292
NP_001259186.1	mRpL14	mitochondrial ribosomal protein L14, isoform B [Drosophila melanogaster]	6	161	0.481	0.00189858	-1.05589	2.72157
NP_648985.1	UQCR-Q	Ubiquinol-cytochrome c reductase ubiquinone-binding protein, isoform A [Drosophila melanogaster]	6	89	0.106	0.00193293	-3.23786	2.71378
NP_609089.1	CG10399	uncharacterized protein Dmel_CG10399, isoform A [Drosophila melanogaster]	6	323	0.427	0.00238793	-1.22769	2.62198
NP_651529.2	Cpr97Ea	cuticular protein 97Ea, isoform A [Drosophila melanogaster]	6	366	9.44	0.00239569	3.23879	2.62057
NP_001261614.1	bol	boule, isoform F [Drosophila melanogaster]	6	233	1.968	0.002472	0.97673	2.60695
NP_573137.1	CG9782	CG9782 [Drosophila melanogaster]	6	226	13.513	0.00273062	3.75628	2.56374
NP_651985.1	CG14630	uncharacterized protein Dmel_CG14630 [Drosophila melanogaster]	6	406	0.405	0.00278662	-1.30401	2.55492
NP_001259660.1	beta-Spec	beta spectrin, isoform B [Drosophila melanogaster]	6	2308	3.322	0.00290681	1.73205	2.53658
NP_650632.1	P5cr-2	Pyrroline-5-carboxylate reductase-like 2, isoform A [Drosophila melanogaster]	6	273	3.13	0.0030528	1.64616	2.5153
NP_001036676.1	Cdep	Chondrocyte-derived ezrin-like domain containing protein, isoform E [Drosophila melanogaster]	6	1167	3.086	0.00311296	1.62574	2.50683
NP_730535.1	Psn	presenilin, isoform B [Drosophila melanogaster]	6	527	2.055	0.00311523	1.03914	2.50651
NP_001260171.1	Fgop2	fibroblast growth factor receptor 1 oncogene partner 2, isoform B [Drosophila melanogaster]	6	315	3.846	0.00323992	1.94336	2.48947
NP_001303575.1	CG42265	uncharacterized protein Dmel_CG42265, isoform F [Drosophila melanogaster]	6	1596	2.171	0.00337453	1.11836	2.47179
NP_650378.1	CG7886	CG7886 [Drosophila melanogaster]	6	818	3.498	0.00344051	1.80653	2.46338
NP_524603.2	Gycbeta100B	guanylyl cyclase beta-subunit at 100B [Drosophila melanogaster]	6	787	1.952	0.00350097	0.964953	2.45581
NP_524657.2	fan	farinelli [Drosophila melanogaster]	6	218	8.695	0.0035614	3.12019	2.44838
NP_610077.1	RPA2	replication protein A2, isoform A [Drosophila melanogaster]	6	246	0.599	0.00417612	-0.739372	2.37923
NP_647966.1	blanks	blanks [Drosophila melanogaster]	6	324	4.981	0.00447317	2.31644	2.34938
NP_001097318.1	Kank	kank, isoform D [Drosophila melanogaster]	6	1339	2.189	0.00479712	1.13027	2.31902
NP_608350.2	CG12531	uncharacterized protein Dmel_CG12531, isoform A [Drosophila melanogaster]	6	812	3.196	0.00527792	1.67627	2.27754
NP_523569.3	GABA-B-R1	metabotropic GABA-B receptor subtype 1, isoform B [Drosophila melanogaster]	6	841	2.086	0.00558325	1.06074	2.25311
NP_611271.3	Dhit	double hit, isoform B [Drosophila melanogaster]	6	274	2.133	0.00596455	1.09288	2.22442
NP_732721.1	CG5382	CG5382 [Drosophila melanogaster]	6	299	2.113	0.00597591	1.07929	2.2236
NP_611235.1	CG14483	uncharacterized protein Dmel_CG14483, isoform A [Drosophila melanogaster]	6	82	0.261	0.00621065	-1.93788	2.20686
NP_647793.1	CG11505	uncharacterized protein Dmel_CG11505, isoform B [Drosophila melanogaster]	6	1531	2.513	0.00655891	1.32941	2.18317
NP_729053.2	CG10671	uncharacterized protein Dmel_CG10671, isoform B [Drosophila melanogaster]	6	480	1.835	0.0071677	0.87578	2.14462
NP_001285505.1	CG1532	CG1532, isoform B [Drosophila melanogaster]	6	288	0.809	0.00724195	-0.305788	2.14014
NP_650104.2	CG6834	CG6834 [Drosophila melanogaster]	6	895	2.251	0.00731235	1.17057	2.13594
NP_001245533.1	Mlc-c	myosin light chain cytoplasmic, isoform B [Drosophila melanogaster]	6	153	0.312	0.00766564	-1.68038	2.11545
NP_477165.1	Nak	Numb-associated kinase, isoform A [Drosophila melanogaster]	6	1488	1.725	0.00768741	0.786596	2.11422
NP_001261051.1	Patronin	patronin, isoform I [Drosophila melanogaster]	6	1689	2.864	0.0079342	1.51803	2.1005
NP_729218.1	Dbi	Diazepam-binding inhibitor, isoform A [Drosophila melanogaster]	6	86	0.21	0.00818118	-2.25154	2.08718
NP_001096985.2	CG43737	uncharacterized protein Dmel_CG43737, isoform B [Drosophila melanogaster]	6	1605	3.054	0.00826487	1.6107	2.08276
NP_730940.1	Nmdar1	NMDA receptor 1 [Drosophila melanogaster]	6	997	1.764	0.00861284	0.818851	2.06485
NP_727526.2	Evi5	ecotropic viral integration site 5, isoform A [Drosophila melanogaster]	6	807	1.793	0.00885163	0.842375	2.05298
NP_650819.1	CG6231	CG6231, isoform A [Drosophila melanogaster]	6	585	1.908	0.00931551	0.932061	2.03079
NP_611738.1	CG3788	CG3788, isoform A [Drosophila melanogaster]	6	378	3.382	0.00971052	1.75788	2.01276
NP_647884.1	CG1311	CG1311, isoform A [Drosophila melanogaster]	6	691	1.578	0.00983439	0.658097	2.00725
NP_726570.1	CaMKI	Calcium/calmodulin-dependent protein kinase I, isoform B [Drosophila melanogaster]	6	405	2.124	0.00985223	1.08678	2.00647
NP_608570.1	Iris	iris [Drosophila melanogaster]	6	531	0.347	0.00987874	-1.52699	2.0053
NP_727644.3	Pde9	phosphodiesterase 9, isoform D [Drosophila melanogaster]	6	1623	7.698	0.0101296	2.94448	1.99441
NP_733215.1	wdb	widerborst, isoform A [Drosophila melanogaster]	6	524	1.697	0.0101836	0.762987	1.9921
NP_001247027.1	Skeletor	skeletor, isoform E [Drosophila melanogaster]	6	1503	3.314	0.0110048	1.72857	1.95842
NP_001014504.1	Asap	ArfGAP with SH3 domain, ankyrin repeat and PH domain, isoform B [Drosophila melanogaster]	6	1155	1.78	0.0110361	0.831877	1.95719
NP_611321.3	Idgf5	imaginal disc growth factor 5 [Drosophila melanogaster]	6	444	2.606	0.0111068	1.38184	1.95441
NP_611995.1	Ebp	ejaculatory bulb protein, isoform A [Drosophila melanogaster]	6	377	2.982	0.0112286	1.57628	1.94968
NP_524758.1	Surf1	surfeit 1 [Drosophila melanogaster]	6	300	0.475	0.0115945	-1.074	1.93575
NP_572757.2	CG2025	CG2025 [Drosophila melanogaster]	6	1147	1.738	0.0123993	0.797428	1.9066
NP_651451.1	CG14540	uncharacterized protein Dmel_CG14540 [Drosophila melanogaster]	6	613	5.039	0.0130347	2.33314	1.8849
NP_524593.1	mRpS18C	mitochondrial ribosomal protein S18C [Drosophila melanogaster]	6	140	0.409	0.0130911	-1.28983	1.88302
NP_995620.1	CG33281	uncharacterized protein Dmel_CG33281 [Drosophila melanogaster]	6	467	3.276	0.013441	1.71194	1.87157
NP_650803.1	CG18493	uncharacterized protein Dmel_CG18493 [Drosophila melanogaster]	6	480	0.371	0.0137502	-1.43051	1.86169
NP_652021.1	CG18031	uncharacterized protein Dmel_CG18031 [Drosophila melanogaster]	6	504	2.51	0.0142591	1.32769	1.84591
NP_572237.1	CG42492	uncharacterized protein Dmel_CG42492, isoform A [Drosophila melanogaster]	6	916	2.264	0.0144469	1.17887	1.84023
NP_523938.2	Txl	Thioredoxin-like [Drosophila melanogaster]	6	287	1.92	0.0146853	0.941106	1.83312
NP_727159.1	CG4607	CG4607, isoform B [Drosophila melanogaster]	6	525	0.571	0.0151578	-0.808437	1.81936
NP_001260318.1	Rsf1	repressor splicing factor 1, isoform B [Drosophila melanogaster]	6	200	3.575	0.0165248	1.83794	1.78186
NP_001262859.1	CG17109	uncharacterized protein Dmel_CG17109, isoform B [Drosophila melanogaster]	6	400	0.519	0.0167344	-0.946194	1.77639
NP_523932.2	AlaRS-m	Alanyl-tRNA synthetase, mitochondrial [Drosophila melanogaster]	6	1012	0.275	0.0170476	-1.8625	1.76834
NP_511076.3	sn	singed, isoform G [Drosophila melanogaster]	6	512	1.475	0.0186467	0.560715	1.7294
NP_648372.1	CG6707	CG6707, isoform A [Drosophila melanogaster]	6	266	1.478	0.0187453	0.563646	1.72711
NP_001245439.1	Cadps	Calcium-dependent secretion activator, isoform D [Drosophila melanogaster]	6	1534	2.235	0.0188368	1.16027	1.72499
NP_610107.1	CG8665	CG8665 [Drosophila melanogaster]	6	913	1.982	0.01948	0.986957	1.71041
NP_477454.1	Aac11	Aac11 [Drosophila melanogaster]	6	536	2.671	0.020571	1.41738	1.68674
NP_608876.1	hoe1	hoepel1, isoform C [Drosophila melanogaster]	6	846	1.339	0.0228809	0.421156	1.64053
NP_651691.4	Ptp99A	protein tyrosine phosphatase 99A, isoform F [Drosophila melanogaster]	6	1397	3	0.0230925	1.58496	1.63653
NP_722663.1	aru	arouser, isoform A [Drosophila melanogaster]	6	805	2.056	0.0241361	1.03984	1.61733
NP_651370.2	CG10513	uncharacterized protein Dmel_CG10513 [Drosophila melanogaster]	6	422	1.38	0.0259264	0.464668	1.58626
NP_612103.1	l(3)02640	lethal (3) 02640 [Drosophila melanogaster]	6	652	1.785	0.0263772	0.835924	1.57877
NP_524520.1	Rb97D	ribonuclear protein at 97D, isoform B [Drosophila melanogaster]	6	471	1.948	0.0282898	0.961994	1.54837
NP_650356.1	ATPsynE	ATP synthase, subunit E, isoform A [Drosophila melanogaster]	6	81	0.221	0.0283388	-2.17788	1.54762
NP_001246747.1	CG6650	CG6650, isoform B [Drosophila melanogaster]	6	501	1.506	0.0298861	0.590722	1.52453
NP_726076.1	MESK2	misexpression suppressor of KSR 2, isoform A [Drosophila melanogaster]	6	447	1.761	0.0305999	0.816395	1.51428
NP_726597.1	gw	gawky, isoform B [Drosophila melanogaster]	6	1384	3.208	0.0306638	1.68167	1.51337
NP_610726.1	jeb	jelly belly, isoform A [Drosophila melanogaster]	6	560	2.311	0.0307605	1.20852	1.51201
NP_001246303.1	stj	straightjacket, isoform C [Drosophila melanogaster]	6	1271	2.041	0.0310165	1.02928	1.50841
NP_610712.1	Zip48C	Zinc/iron regulated transporter-related protein 48C [Drosophila melanogaster]	6	341	1.678	0.0310532	0.746743	1.50789
NP_648759.1	CG6888	CG6888 [Drosophila melanogaster]	6	196	2.487	0.0321745	1.31441	1.49249
NP_001285602.1	mRpL27	mitochondrial ribosomal protein L27, isoform C [Drosophila melanogaster]	6	138	0.653	0.033441	-0.614845	1.47572
NP_608417.2	Npc1b	Niemann-Pick type C-1b [Drosophila melanogaster]	6	1254	0.258	0.0335895	-1.95456	1.4738
NP_524214.1	Hem	HEM-protein [Drosophila melanogaster]	6	1126	1.621	0.0338041	0.696884	1.47103
NP_001262171.2	Wnk	Wnk kinase, isoform M [Drosophila melanogaster]	6	2462	1.969	0.0341059	0.977463	1.46717
NP_001262413.1	alpha-Man-IIa	alpha-Mannosidase class II a, isoform B [Drosophila melanogaster]	6	1109	2.213	0.0356038	1.146	1.4485
NP_730158.1	CG4753	CG4753, isoform A [Drosophila melanogaster]	6	380	0.422	0.0362539	-1.24469	1.44065
NP_650678.1	CG7218	CG7218, isoform A [Drosophila melanogaster]	6	676	1.963	0.0393186	0.97306	1.4054
NP_724773.1	hig	hikaru genki, isoform A [Drosophila melanogaster]	6	958	1.748	0.0416962	0.805705	1.3799
NP_001259254.1	CG42492	uncharacterized protein Dmel_CG42492, isoform D [Drosophila melanogaster]	6	977	3.158	0.04467	1.65901	1.34998
NP_649692.2	Dpck	Dephospho-CoA kinase [Drosophila melanogaster]	6	236	1.616	0.0463815	0.692427	1.33366
NP_001162967.1	CG9934	CG9934, isoform B [Drosophila melanogaster]	6	1217	1.765	0.0469249	0.819668	1.3286
NP_611857.3	CG16787	uncharacterized protein Dmel_CG16787 [Drosophila melanogaster]	6	253	0.412	0.0473554	-1.27928	1.32463
NP_650743.1	CG7708	CG7708, isoform A [Drosophila melanogaster]	6	614	2.248	0.051691	1.16864	1.28658
NP_001188923.1	CG6701	CG6701, isoform B [Drosophila melanogaster]	6	1333	1.839	0.0524886	0.878921	1.27993
NP_609287.3	Mco1	multicopper oxidase-1, isoform A [Drosophila melanogaster]	6	959	0.764	0.0531213	-0.388355	1.27473
NP_649563.1	CG12171	uncharacterized protein Dmel_CG12171 [Drosophila melanogaster]	6	257	0.765	0.0534489	-0.386468	1.27206
NP_649971.1	mtTFB2	mitochondrial transcription factor B2 [Drosophila melanogaster]	6	452	0.617	0.054033	-0.696658	1.26734
NP_572699.2	CG44422	uncharacterized protein Dmel_CG44422, isoform A [Drosophila melanogaster]	6	746	2.525	0.0544802	1.33628	1.26376
[truncated: 2,972 more rows]

## Sheet: SOD2 vs WT new
SOD2 (SD) vs WT (F): all proteins with valid abudance ratio and p values
Accession	Proteins	Description	# Unique Peptides	# AAs	Abundance Ratio: (SD) / (F)	Abundance Ratio P-Value: (SD) / (F)	Abundance Ratio: log2 (SD) / (F)	Abundance Ratio P-Value: -log10-(SD) / (F)
NP_001261287.1	alpha-Spec	alpha spectrin, isoform C [Drosophila melanogaster]	240	2447	1.915	0.00614609	0.937344	2.2114
NP_524634.2	apolpp	apolipophorin, isoform A [Drosophila melanogaster]	198	3351	1.07	0.985516	0.0976108	0.00633632
NP_001162825.1	bt	bent, isoform F [Drosophila melanogaster]	163	8933	1.406	0.0660973	0.491597	1.17982
NP_001097492.2	kst	karst, isoform E [Drosophila melanogaster]	144	4337	1.331	0.382663	0.412511	0.417183
NP_001162632.2	futsch	futsch, isoform E [Drosophila melanogaster]	107	5495	2.366	0.0356225	1.24245	1.44828
NP_001188694.1	Msp300	Muscle-specific protein 300 kDa, isoform D [Drosophila melanogaster]	105	12345	2.125	0.00415739	1.08746	2.38118
NP_001262658.1	cher	cheerio, isoform M [Drosophila melanogaster]	102	2429	1.805	0.019067	0.851999	1.71972
NP_001261304.1	sls	sallimus, isoform P [Drosophila melanogaster]	102	18468	1.277	0.320022	0.352759	0.49482
NP_523596.2	bsf	bicoid stability factor [Drosophila melanogaster]	98	1412	0.784	0.366221	-0.351074	0.436257
NP_001137778.2	FASN1	fatty acid synthase 1, isoform C [Drosophila melanogaster]	97	2540	1.08	0.981726	0.111031	0.0080098
NP_525064.1	lva	lava lamp, isoform C [Drosophila melanogaster]	95	2779	2.623	0.0034084	1.39122	2.46745
NP_001259282.1	CG34417	uncharacterized protein Dmel_CG34417, isoform T [Drosophila melanogaster]	89	5182	4.579	0.000720995	2.19503	3.14207
NP_724841.1	PCB	pyruvate carboxylase, isoform I [Drosophila melanogaster]	89	1197	1.482	0.045187	0.567545	1.34499
NP_001027038.3	trol	terribly reduced optic lobes, isoform AT [Drosophila melanogaster]	86	4479	1.066	0.87396	0.0922074	0.0585085
NP_609058.2	Tango1	transport and golgi organization 1, isoform A [Drosophila melanogaster]	81	1430	1.735	0.0122731	0.794936	1.91105
NP_725369.1	Opa1	optic atrophy 1, isoform A [Drosophila melanogaster]	79	972	0.927	0.970097	-0.109359	0.0131849
NP_523741.2	Hsc70-5	heat shock protein cognate 5, isoform A [Drosophila melanogaster]	77	686	0.743	0.159198	-0.428566	0.798061
NP_726453.1	Letm1	LETM1 ortholog, isoform A [Drosophila melanogaster]	76	1013	1.634	0.00222886	0.708408	2.65192
NP_611063.1	Gpo-1	glycerophosphate oxidase-1, isoform C [Drosophila melanogaster]	71	724	0.694	0.168866	-0.526992	0.772458
NP_726243.1	blw	bellwether [Drosophila melanogaster]	71	552	0.665	0.042026	-0.588574	1.37648
NP_651601.1	Gp93	glycoprotein 93 [Drosophila melanogaster]	69	787	0.814	0.866765	-0.296899	0.0620988
NP_996113.2	Lmpt	limpet, isoform K [Drosophila melanogaster]	68	2147	2.612	0.000445791	1.38515	3.35087
NP_524471.2	GluProRS	Glutamyl-prolyl-tRNA synthetase, isoform A [Drosophila melanogaster]	67	1714	2.653	0.00955392	1.40762	2.01982
NP_725511.2	Strn-Mlck	Stretchin-Mlck, isoform R [Drosophila melanogaster]	66	1918	3.835	0.00758129	1.93923	2.12026
NP_001246804.1	CG9674	CG9674, isoform F [Drosophila melanogaster]	65	2115	1.054	0.875334	0.0758749	0.0578261
NP_511132.2	Hsc70-3	heat shock 70-kDa protein cognate 3, isoform B [Drosophila melanogaster]	64	656	0.873	0.944123	-0.195946	0.0249716
NP_001097440.1	Unc-89	Unc-89, isoform C [Drosophila melanogaster]	63	4218	2.851	0.00756292	1.51147	2.12131
NP_727255.1	ND-75	NADH dehydrogenase (ubiquinone) 75 kDa subunit, isoform B [Drosophila melanogaster]	62	731	0.633	0.0473036	-0.659723	1.32511
NP_610299.2	Vps13	vacuolar protein sorting 13, isoform A [Drosophila melanogaster]	62	3321	1.481	0.0567129	0.566572	1.24632
NP_524996.1	bor	belphegor, isoform A [Drosophila melanogaster]	62	604	1.024	0.9999	0.0342157	4.35278e-05
NP_476934.2	Myo61F	myosin 61F, isoform D [Drosophila melanogaster]	61	1052	0.325	0.00241472	-1.62149	2.61713
NP_001246674.1	rhea	rhea, isoform B [Drosophila melanogaster]	61	2836	1.936	0.00573166	0.953079	2.24172
NP_001162645.1	CG2918	CG2918, isoform B [Drosophila melanogaster]	60	923	0.847	0.92912	-0.239566	0.0319282
NP_995670.2	Apoltp	apolipoprotein lipid transfer particle [Drosophila melanogaster]	60	4333	0.751	0.0440867	-0.413115	1.35569
NP_723470.1	Mtpalpha	mitochondrial trifunctional protein alpha subunit, isoform B [Drosophila melanogaster]	60	744	0.794	0.399919	-0.332789	0.398028
NP_730248.2	CG6512	CG6512, isoform A [Drosophila melanogaster]	59	826	0.968	0.994613	-0.046921	0.0023459
NP_524708.1	Acon	aconitase, isoform B [Drosophila melanogaster]	58	787	0.822	0.356524	-0.28279	0.447911
NP_523899.1	Hsp83	heat shock protein 83, isoform A [Drosophila melanogaster]	58	717	1.537	0.312022	0.620117	0.505815
NP_476617.1	LanA	laminin A [Drosophila melanogaster]	58	3712	1.653	0.0202613	0.725087	1.69333
NP_609835.2	CLIP-190	cytoplasmic linker protein 190, isoform A [Drosophila melanogaster]	58	1690	1.775	0.120718	0.827819	0.91823
NP_610551.1	CG1371	CG1371 [Drosophila melanogaster]	57	1199	1.11	0.795119	0.15056	0.0995677
NP_001245581.1	Nrg	neuroglian, isoform G [Drosophila melanogaster]	57	1309	1.834	0.00345256	0.874994	2.46186
NP_524356.1	Hsc70-4	heat shock protein cognate 4, isoform A [Drosophila melanogaster]	56	651	1.413	0.022755	0.498761	1.64292
NP_524006.1	LanB2	laminin B2, isoform A [Drosophila melanogaster]	56	1639	1.832	0.0536984	0.87342	1.27004
NP_001286040.1	Acp36DE	accessory gland protein 36DE, isoform B [Drosophila melanogaster]	55	912	7.371	0.000747959	2.88186	3.12612
NP_001245892.1	Lam	lamin, isoform B [Drosophila melanogaster]	55	622	2.144	0.257826	1.1003	0.588673
NP_001097685.2	Cdep	Chondrocyte-derived ezrin-like domain containing protein, isoform G [Drosophila melanogaster]	54	4273	1.913	0.150583	0.935837	0.822223
NP_524079.1	Pdi	protein disulfide isomerase, isoform A [Drosophila melanogaster]	54	496	0.681	0.707539	-0.554273	0.150249
NP_001263137.1	chp	chaoptin, isoform D [Drosophila melanogaster]	54	1338	1.388	0.304138	0.473008	0.51693
NP_727489.1	Hsp60A	heat shock protein 60A, isoform B [Drosophila melanogaster]	51	573	0.548	0.0247315	-0.867752	1.60675
NP_723772.2	MRP	Multidrug-Resistance like protein 1, isoform A [Drosophila melanogaster]	51	1549	0.967	0.999643	-0.0484122	0.000154859
NP_610342.1	ACC	Acetyl-CoA carboxylase, isoform A [Drosophila melanogaster]	51	2482	1.67	0.0477792	0.739848	1.32076
NP_476590.1	Khc	kinesin heavy chain [Drosophila melanogaster]	51	975	1.773	0.0210652	0.826193	1.67644
NP_648687.1	Hsc70Cb	Hsc70Cb, isoform A [Drosophila melanogaster]	51	804	1.032	0.982471	0.045443	0.00768032
NP_001287272.1	CG42795	uncharacterized protein Dmel_CG42795, isoform G [Drosophila melanogaster]	50	3213	3.243	0.0196137	1.69733	1.70744
NP_730838.3	eIF3-S10	eIF3-S10, isoform D [Drosophila melanogaster]	50	1140	1.887	0.0306264	0.916094	1.5139
NP_725084.2	ERp60	ERp60 [Drosophila melanogaster]	50	489	1.273	0.886486	0.348232	0.0523281
NP_730695.1	P5CDh1	delta-1-Pyrroline-5-carboxylate dehydrogenase 1, isoform A [Drosophila melanogaster]	49	574	0.695	0.0745094	-0.524915	1.12779
NP_001027277.1	CadN	Cadherin-N, isoform L [Drosophila melanogaster]	48	3101	2.169	0.00517043	1.11703	2.28647
NP_001096924.2	mgl	megalin, isoform A [Drosophila melanogaster]	48	4769	1.132	0.63662	0.178874	0.19612
NP_001284813.1	Vinc	vinculin, isoform B [Drosophila melanogaster]	48	961	1.638	0.0150181	0.711935	1.82339
NP_612021.1	Tudor-SN	tudor staphylococcal nuclease, isoform A [Drosophila melanogaster]	47	926	1.074	0.760561	0.102994	0.118866
NP_001260810.1	Acsl	Acyl-CoA synthetase long-chain, isoform J [Drosophila melanogaster]	47	728	0.715	0.134981	-0.483985	0.869728
NP_001260128.1	Cpr	cytochrome P450 reductase, isoform C [Drosophila melanogaster]	47	679	1.027	0.999475	0.0384362	0.000227951
NP_727901.1	Chc	clathrin heavy chain, isoform B [Drosophila melanogaster]	47	1678	3.25	0.00152501	1.70044	2.81673
NP_731489.2	pug	pugilist, isoform B [Drosophila melanogaster]	47	968	2.154	0.000781421	1.10702	3.10712
NP_001014650.2	jar	jaguar, isoform H [Drosophila melanogaster]	46	1268	0.969	0.999861	-0.0454314	6.02831e-05
NP_001027219.1	GlyP	glycogen phosphorylase, isoform B [Drosophila melanogaster]	46	844	1.399	0.614467	0.484396	0.211501
NP_726631.1	ATPsynbeta	ATP synthase, beta subunit, isoform A [Drosophila melanogaster]	45	505	0.726	0.0476914	-0.461959	1.32156
NP_996339.2	CG2658	CG2658, isoform C [Drosophila melanogaster]	45	819	1.042	0.997538	0.0593553	0.00107045
NP_001246877.1	CG7470	CG7470, isoform B [Drosophila melanogaster]	45	776	1.568	0.0538822	0.648926	1.26855
NP_728202.1	bnb	bangles and beads, isoform B [Drosophila melanogaster]	44	442	2.522	0.235348	1.33457	0.628289
NP_523742.2	LamC	lamin C, isoform A [Drosophila melanogaster]	44	621	1.644	0.671927	0.71721	0.172678
NP_609408.1	LManII	lysosomal alpha-mannosidase II, isoform A [Drosophila melanogaster]	43	1080	0.406	0.00865802	-1.30045	2.06258
NP_649461.2	Cont	contactin [Drosophila melanogaster]	43	1390	1.903	0.00209772	0.928276	2.67825
NP_524151.2	Ugt	UDP-glucose-glycoprotein glucosyltransferase [Drosophila melanogaster]	43	1548	0.861	0.862038	-0.215915	0.0644735
NP_733144.3	Ald	aldolase, isoform K [Drosophila melanogaster]	43	361	0.99	0.999985	-0.0144996	6.67664e-06
NP_001097814.1	Fas1	fasciclin 1, isoform D [Drosophila melanogaster]	42	662	1.162	0.285736	0.21661	0.544035
NP_727290.1	Moe	moesin, isoform B [Drosophila melanogaster]	42	649	0.613	0.000418801	-0.706041	3.37799
NP_523982.2	Prm	paramyosin, isoform A [Drosophila melanogaster]	41	879	0.844	0.744837	-0.244685	0.127939
NP_001261019.1	Strn-Mlck	Stretchin-Mlck, isoform U [Drosophila melanogaster]	41	8255	5.147	0.000365667	2.36373	3.43691
NP_725882.1	SdhA	succinate dehydrogenase, subunit A (flavoprotein), isoform C [Drosophila melanogaster]	41	661	0.527	0.000932067	-0.924125	3.03055
NP_001245961.1	porin	porin, isoform D [Drosophila melanogaster]	41	282	0.888	0.918626	-0.171368	0.0368611
NP_724824.1	CG1648	CG1648, isoform B [Drosophila melanogaster]	41	232	2.257	0.0579811	1.17441	1.23671
NP_731954.1	UQCR-C1	Ubiquinol-cytochrome c reductase core protein 1, isoform A [Drosophila melanogaster]	41	470	0.715	0.108926	-0.483985	0.962867
NP_001245864.1	bark	bark beetle, isoform B [Drosophila melanogaster]	41	3123	1.435	0.00877681	0.521051	2.05666
NP_476768.1	trp	transient receptor potential, isoform A [Drosophila melanogaster]	41	1275	3.156	0.00278796	1.6581	2.55471
NP_001259986.1	FASN2	fatty acid synthase 2, isoform B [Drosophila melanogaster]	40	2410	1.673	0.0783584	0.742437	1.10591
NP_523781.2	Dp1	Dodeca-satellite-binding protein 1, isoform G [Drosophila melanogaster]	40	1301	1.301	0.354325	0.379621	0.450598
NP_524106.3	fax	failed axon connections, isoform A [Drosophila melanogaster]	40	418	2.749	0.142071	1.45891	0.847495
NP_477266.1	Vha44	vacuolar H[+] ATPase 44kD subunit, isoform A [Drosophila melanogaster]	40	388	0.649	0.0251387	-0.62371	1.59966
NP_728435.1	GCS2alpha	glucosidase 2 alpha subunit, isoform C [Drosophila melanogaster]	40	924	1.03	0.999681	0.0426443	0.000138525
NP_732653.2	CG31233	uncharacterized protein Dmel_CG31233, isoform A [Drosophila melanogaster]	40	952	0.209	0.0101968	-2.25843	1.99154
NP_611409.2	CG7461	CG7461, isoform B [Drosophila melanogaster]	40	627	0.552	0.276658	-0.85726	0.558057
NP_611265.1	OstDelta	oligosaccharide transferase delta subunit, isoform A [Drosophila melanogaster]	40	634	0.944	0.994903	-0.0831412	0.00221914
NP_001262747.1	CG4562	CG4562, isoform E [Drosophila melanogaster]	39	1408	0.297	0.00203111	-1.75147	2.69227
NP_001096852.1	eIF4G	eukaryotic translation initiation factor 4G, isoform B [Drosophila melanogaster]	39	1919	2.268	0.00696656	1.18142	2.15698
NP_649466.1	lost	lost [Drosophila melanogaster]	39	545	1.509	0.112862	0.593593	0.947453
NP_477485.1	Actn	alpha actinin, isoform C [Drosophila melanogaster]	39	917	1.252	0.413873	0.324235	0.383132
NP_476908.1	Vha55	vacuolar H[+]-ATPase 55kD subunit, isoform B [Drosophila melanogaster]	39	490	0.795	0.0791753	-0.330973	1.10141
NP_001259836.1	CG11835	uncharacterized protein Dmel_CG11835, isoform C [Drosophila melanogaster]	38	795	6.537	0.00208199	2.70863	2.68152
NP_536731.1	Cat	catalase [Drosophila melanogaster]	38	506	1.356	0.218437	0.439357	0.660673
NP_722765.2	AIF	apoptosis inducing factor, isoform B [Drosophila melanogaster]	38	739	0.803	0.12577	-0.316528	0.900422
NP_001246473.1	CG3499	CG3499, isoform C [Drosophila melanogaster]	38	740	0.97	0.994087	-0.0439433	0.00257582
NP_648905.1	UQCR-C2	Ubiquinol-cytochrome c reductase core protein 2, isoform A [Drosophila melanogaster]	38	440	0.658	0.0975855	-0.603841	1.01061
30794280		serum albumin precursor [Bos taurus]	38	607	0.373	0.0228938	-1.42275	1.64028
NP_524293.2	Calr	calreticulin, isoform A [Drosophila melanogaster]	38	406	1.849	0.497613	0.886745	0.303109
NP_724357.2	EF2	elongation factor 2, isoform D [Drosophila melanogaster]	38	844	1.1	0.528303	0.137504	0.277117
NP_725339.1	shot	short stop, isoform H [Drosophila melanogaster]	37	8805	2.532	0.00993135	1.34028	2.00299
NP_525069.2	norpA	no receptor potential A, isoform A [Drosophila melanogaster]	37	1095	2.277	0.0138717	1.18713	1.85787
NP_524688.1	Mcr	macroglobulin complement-related [Drosophila melanogaster]	37	1760	1.825	0.00722035	0.867896	2.14144
NP_001285318.1	Mfe2	peroxisomal multifunctional enzyme type 2, isoform B [Drosophila melanogaster]	37	598	1.556	0.195523	0.637842	0.708802
NP_725252.1	TppII	tripeptidyl-peptidase II, isoform D [Drosophila melanogaster]	37	1441	1.371	0.101295	0.455229	0.994413
NP_611264.2	CG5009	CG5009 [Drosophila melanogaster]	36	669	1.498	0.187068	0.583038	0.728
NP_001097372.1	Phb2	prohibitin 2, isoform E [Drosophila melanogaster]	36	338	0.761	0.421107	-0.394032	0.375607
NP_524637.2	PlexA	plexin A, isoform A [Drosophila melanogaster]	36	1945	1.242	0.0234019	0.312665	1.63075
NP_476812.1	PPO1	prophenoloxidase 1 [Drosophila melanogaster]	36	690	7.357	0.000209951	2.87912	3.67788
NP_610937.4	CG30069	uncharacterized protein Dmel_CG30069 [Drosophila melanogaster]	36	4012	3.49	0.00517053	1.80323	2.28646
NP_731737.1	Past1	putative achaete scute target 1, isoform A [Drosophila melanogaster]	36	540	1.452	0.489059	0.538041	0.310639
NP_647756.1	CPT2	carnitine palmitoyltransferase 2 [Drosophila melanogaster]	36	667	0.786	0.792774	-0.347399	0.100851
NP_649168.2	Gabat	gamma-aminobutyric acid transaminase, isoform A [Drosophila melanogaster]	35	486	0.578	0.0752807	-0.790859	1.12332
NP_732654.1	CG31198	uncharacterized protein Dmel_CG31198 [Drosophila melanogaster]	35	940	0.249	0.0179611	-2.00578	1.74567
NP_609027.3	CG9527	CG9527, isoform A [Drosophila melanogaster]	35	703	0.794	0.0321319	-0.332789	1.49306
NP_609397.2	CG5355	CG5355 [Drosophila melanogaster]	35	756	0.982	0.998933	-0.0262051	0.000463639
NP_730716.1	IleRS	Isoleucyl-tRNA synthetase, isoform A [Drosophila melanogaster]	35	1229	1.463	0.501329	0.54893	0.299877
NP_001163782.1	mesh	mesh, isoform D [Drosophila melanogaster]	35	1454	0.672	0.0322126	-0.573467	1.49197
NP_572742.1	prtp	pretaporter, isoform A [Drosophila melanogaster]	35	416	1.703	0.481871	0.768078	0.31707
NP_722724.1	Eno	enolase, isoform E [Drosophila melanogaster]	35	500	0.887	0.624031	-0.172994	0.204794
NP_477310.2	Uba1	ubiquitin activating enzyme 1, isoform A [Drosophila melanogaster]	35	1191	1.068	0.693392	0.0949116	0.159021
NP_733244.5	larp	La related protein, isoform D [Drosophila melanogaster]	35	1673	2.457	0.0358724	1.2969	1.44524
NP_727450.1	sesB	stress-sensitive B, isoform B [Drosophila melanogaster]	34	299	0.537	0.312815	-0.897006	0.504712
NP_787122.1	Ank	ankyrin, isoform B [Drosophila melanogaster]	34	1549	1.993	0.000238664	0.994942	3.62221
NP_001285071.1	Yp1	yolk protein 1, isoform B [Drosophila melanogaster]	34	439	0.139	0.00205238	-2.84684	2.68774
NP_511102.3	Yp2	yolk protein 2, isoform A [Drosophila melanogaster]	34	442	0.112	0.00122155	-3.15843	2.91309
NP_648149.1	CG12262	uncharacterized protein Dmel_CG12262 [Drosophila melanogaster]	34	419	0.886	0.758293	-0.174621	0.120163
NP_650477.1	AOX3	aldehyde oxidase 3, isoform A [Drosophila melanogaster]	34	1254	0.646	0.00701966	-0.630394	2.15368
NP_524550.1	ATPsyngamma	ATP synthase, gamma subunit, isoform A [Drosophila melanogaster]	34	297	0.517	0.18473	-0.951764	0.733462
NP_650696.1	Mdh2	malate dehydrogenase 2 [Drosophila melanogaster]	34	336	0.534	0.018182	-0.905088	1.74036
NP_524448.3	PyK	pyruvate kinase, isoform A [Drosophila melanogaster]	34	533	1.675	0.0677805	0.744161	1.1689
NP_728614.1	Psa	puromycin sensitive aminopeptidase, isoform C [Drosophila melanogaster]	34	1075	1.354	0.214105	0.437228	0.669373
NP_001096891.1	CG15894	uncharacterized protein Dmel_CG15894, isoform B [Drosophila melanogaster]	34	1598	2.892	0.0346867	1.53207	1.45984
NP_523815.2	nahoda	nahoda, isoform A [Drosophila melanogaster]	34	1335	1.978	0.0815319	0.984042	1.08867
NP_649234.1	ND-39	NADH dehydrogenase (ubiquinone) 39 kDa subunit, isoform A [Drosophila melanogaster]	34	416	0.576	0.0142434	-0.795859	1.84638
NP_525031.1	Cyp4g1	cytochrome P450-4g1 [Drosophila melanogaster]	33	556	0.564	0.0402151	-0.826233	1.39561
NP_001285297.1	mRpS30	mitochondrial ribosomal protein S30, isoform B [Drosophila melanogaster]	33	557	1.215	0.757843	0.280956	0.120421
NP_727696.2	CG1640	CG1640, isoform B [Drosophila melanogaster]	33	575	0.71	0.169337	-0.494109	0.771248
NP_523401.2	Tsf1	transferrin 1, isoform A [Drosophila melanogaster]	33	641	1.735	0.00430407	0.794936	2.36612
NP_001284854.1	Fas2	fasciclin 2, isoform G [Drosophila melanogaster]	33	885	1.242	0.122404	0.312665	0.912203
NP_651762.1	CG7920	CG7920, isoform A [Drosophila melanogaster]	33	477	0.69	0.165188	-0.535332	0.782021
NP_524538.2	RpL4	ribosomal protein L4 [Drosophila melanogaster]	33	401	0.998	1	-0.00288828	1.49649e-09
NP_650327.1	Cyp6d5	Cyp6d5 [Drosophila melanogaster]	33	508	0.596	0.232345	-0.746616	0.633866
NP_001137754.1	prom	prominin, isoform D [Drosophila melanogaster]	33	1235	2.347	0.00676011	1.23082	2.17005
NP_476819.2	AP-2alpha	adaptor protein complex 2, alpha subunit, isoform A [Drosophila melanogaster]	33	940	1.762	0.0135812	0.817214	1.86706
NP_731237.1	DppIII	dipeptidyl aminopeptidase III, isoform C [Drosophila melanogaster]	33	786	0.669	0.0414793	-0.579922	1.38217
NP_649812.2	CG8036	CG8036, isoform B [Drosophila melanogaster]	33	626	1.165	0.348342	0.22033	0.457994
NP_001137910.2	Idh	isocitrate dehydrogenase, isoform K [Drosophila melanogaster]	33	479	0.957	0.993579	-0.0634092	0.00279757
NP_001246015.1	Vha68-2	vacuolar H[+] ATPase 68 kDa subunit 2, isoform D [Drosophila melanogaster]	32	614	0.7	0.00814323	-0.514573	2.0892
NP_608827.1	Tps1	Trehalose-6-phosphate synthase 1 [Drosophila melanogaster]	32	809	1.607	0.139235	0.68437	0.856252
NP_477439.2	Trap1	Trap1, isoform A [Drosophila melanogaster]	32	691	0.856	0.807209	-0.224317	0.0930141
NP_650722.1	Vha100-2	vacuolar H[+] ATPase 100kD subunit 2, isoform B [Drosophila melanogaster]	32	834	0.884	0.690512	-0.177882	0.160829
NP_995656.1	AlaRS	Alanyl-tRNA synthetase, isoform B [Drosophila melanogaster]	32	966	0.932	0.946395	-0.101598	0.0239276
NP_001245921.1	CG18304	uncharacterized protein Dmel_CG18304, isoform B [Drosophila melanogaster]	32	1819	4.499	0.00071492	2.1696	3.14574
NP_524445.1	ND-42	NADH dehydrogenase (ubiquinone) 42 kDa subunit, isoform A [Drosophila melanogaster]	32	407	0.636	0.00198513	-0.652901	2.70221
NP_001245922.1	uif	uninflatable, isoform D [Drosophila melanogaster]	32	3589	4.17	0.00184278	2.06005	2.73453
NP_611787.2	Golgin245	Golgin-245 [Drosophila melanogaster]	32	1489	1.758	0.115758	0.813935	0.93645
NP_511148.2	Yp3	yolk protein 3, isoform A [Drosophila melanogaster]	31	420	0.087	0.0015408	-3.52284	2.81225
NP_523497.2	ade3	adenosine 3, isoform A [Drosophila melanogaster]	31	1353	1.269	0.281584	0.343692	0.550393
NP_652032.1	Sply	Sphingosine-1-phosphate lyase, isoform A [Drosophila melanogaster]	31	545	0.565	0.0095103	-0.823677	2.02181
NP_650648.3	Pxt	Peroxinectin-like [Drosophila melanogaster]	31	809	0.305	0.000645643	-1.71312	3.19001
NP_609536.1	Tom70	translocase of outer membrane 70, isoform A [Drosophila melanogaster]	31	589	1.31	0.0199981	0.389567	1.69901
NP_524316.1	RpL3	ribosomal protein L3, isoform A [Drosophila melanogaster]	31	416	0.866	0.736388	-0.207561	0.132893
NP_652000.1	Ef1gamma	Ef1gamma, isoform A [Drosophila melanogaster]	31	431	1.391	0.541218	0.476122	0.266627
NP_001247302.1	Nup358	nucleoporin 358kD, isoform B [Drosophila melanogaster]	31	2718	1.361	0.051247	0.444667	1.29033
NP_572371.1	CG4586	CG4586 [Drosophila melanogaster]	31	677	1.418	0.500676	0.503858	0.300443
NP_525109.1	Rab32	Rab32, isoform B [Drosophila melanogaster]	31	686	1.336	0.0886793	0.41792	1.05218
NP_728643.2	ABCB7	ATP binding cassette subfamily B member 7, isoform B [Drosophila melanogaster]	30	709	0.801	0.420306	-0.320126	0.376434
NP_001036397.2	Slmap	sarcolemma associated protein, isoform D [Drosophila melanogaster]	30	897	4.071	0.000190014	2.02538	3.72121
NP_001261317.1	zormin	zormin, isoform J [Drosophila melanogaster]	30	3664	3.027	0.000143381	1.59789	3.84351
NP_727091.1	kdn	knockdown, isoform B [Drosophila melanogaster]	30	522	0.821	0.287107	-0.284546	0.541956
NP_650190.1	CG5167	CG5167 [Drosophila melanogaster]	30	431	0.791	0.210192	-0.33825	0.677384
NP_609188.4	Piezo	piezo, isoform J [Drosophila melanogaster]	30	2621	1.764	0.0790209	0.818851	1.10226
NP_651314.1	CG11771	uncharacterized protein Dmel_CG11771 [Drosophila melanogaster]	30	730	0.481	0.00566268	-1.05589	2.24698
NP_524415.1	TFAM	mitochondrial transcription factor A, isoform A [Drosophila melanogaster]	30	257	0.675	0.054196	-0.567041	1.26603
NP_477378.1	Thiolase	thiolase [Drosophila melanogaster]	30	469	0.889	0.623288	-0.169745	0.205311
NP_001189286.1	CG11089	uncharacterized protein Dmel_CG11089, isoform B [Drosophila melanogaster]	29	590	1.195	0.661634	0.257011	0.179382
NP_649690.1	Ufl1	UFM1 specific ligase 1, isoform A [Drosophila melanogaster]	29	782	1.619	0.00373333	0.695103	2.4279
NP_523506.1	Tep2	Thioester-containing protein 2, isoform A [Drosophila melanogaster]	29	1420	1.044	0.989167	0.0621217	0.00473017
NP_524358.2	ATPsynO	ATP synthase, oligomycin sensitivity conferring protein [Drosophila melanogaster]	29	209	0.259	0.13487	-1.94898	0.870085
NP_001163558.1	skap	skpA associated protein, isoform C [Drosophila melanogaster]	29	503	1.645	0.0361712	0.718088	1.44164
NP_723146.1	ade2	adenosine 2, isoform B [Drosophila melanogaster]	29	1354	1.611	0.00723458	0.687956	2.14059
NP_523528.1	yip2	yippee interacting protein 2 [Drosophila melanogaster]	29	398	0.698	0.0230658	-0.518701	1.63703
NP_001262356.1	CD98hc	CD98 heavy chain, isoform D [Drosophila melanogaster]	29	567	0.83	0.268601	-0.268817	0.570893
NP_476760.1	Top2	topoisomerase 2, isoform A [Drosophila melanogaster]	29	1447	1.113	0.976276	0.154454	0.0104274
NP_724562.2	Aldh-III	aldehyde dehydrogenase type III, isoform Q [Drosophila melanogaster]	29	564	1.048	0.977925	0.0676387	0.00969441
NP_727348.2	Cubn	cubilin [Drosophila melanogaster]	29	3750	1.395	0.0769734	0.480265	1.11366
NP_001188817.2	CG4587	CG4587, isoform I [Drosophila melanogaster]	29	1271	1.758	0.014691	0.813935	1.83295
NP_524060.2	Hml	hemolectin, isoform A [Drosophila melanogaster]	29	3843	2.41	0.014829	1.26903	1.82889
NP_723319.1	LanB1	LanB1, isoform B [Drosophila melanogaster]	29	1788	1.661	0.127549	0.732052	0.894324
NP_611675.2	CG4752	CG4752 [Drosophila melanogaster]	29	1294	2.484	0.00488681	1.31267	2.31097
NP_649650.2	CRAT	carnitine O-Acetyl-Transferase, isoform A [Drosophila melanogaster]	29	662	1.002	1	0.00288251	4.25978e-09
NP_524877.1	comt	comatose, isoform A [Drosophila melanogaster]	28	745	1.633	0.0661067	0.707525	1.17975
NP_001162940.3	Fatp	fatty acid (long chain) transport protein, isoform F [Drosophila melanogaster]	28	746	1.284	0.619277	0.360645	0.208115
NP_524880.2	Men	malic enzyme, isoform B [Drosophila melanogaster]	28	763	0.827	0.785864	-0.274041	0.104653
NP_523836.2	Adk2	adenylate kinase 2 [Drosophila melanogaster]	28	240	0.791	0.703479	-0.33825	0.152749
NP_609118.1	muc	midline uncoordinated, isoform B [Drosophila melanogaster]	28	512	0.954	0.998697	-0.0679388	0.000566324
NP_733465.1	Map205	Microtubule-associated protein 205, isoform B [Drosophila melanogaster]	28	1185	3.082	0.0216522	1.62387	1.6645
NP_001027290.1	His1:CG33807	histone H1 [Drosophila melanogaster]	28	256	1.274	0.977325	0.349365	0.00996112
NP_788675.1	CG9297	CG9297, isoform A [Drosophila melanogaster]	28	930	1.167	0.973657	0.222805	0.0115939
NP_524243.2	Rm62	Rm62, isoform A [Drosophila melanogaster]	28	719	0.597	0.0279784	-0.744197	1.55318
NP_001246231.1	Etf-QO	electron transfer flavoprotein-ubiquinone oxidoreductase, isoform B [Drosophila melanogaster]	28	604	0.611	6.36562e-05	-0.710756	4.19616
NP_572278.1	CG3011	CG3011, isoform A [Drosophila melanogaster]	28	537	0.977	0.998456	-0.0335695	0.000671007
NP_001285254.1	CG9509	CG9509, isoform B [Drosophila melanogaster]	28	646	0.878	0.8787	-0.187707	0.0561595
NP_649521.1	CG12163	uncharacterized protein Dmel_CG12163, isoform B [Drosophila melanogaster]	28	475	0.752	0.0317856	-0.411195	1.49777
NP_001137776.1	Rrp1	recombination repair protein 1, isoform B [Drosophila melanogaster]	27	706	1.215	0.910228	0.280956	0.0408498
NP_723596.1	Myo31DF	myosin 31DF, isoform B [Drosophila melanogaster]	27	1011	0.55	0.0356295	-0.862496	1.44819
NP_524044.1	Tsf2	transferrin 2 [Drosophila melanogaster]	27	819	1.797	0.00520682	0.84559	2.28343
NP_524261.1	alpha-Est7	alpha-Esterase-7 [Drosophila melanogaster]	27	572	1.125	0.984459	0.169925	0.00680222
NP_001260946.1	ValRS	Valyl-tRNA synthetase, isoform C [Drosophila melanogaster]	27	1055	0.923	0.610431	-0.115597	0.214364
NP_650475.1	AOX1	aldehyde oxidase 1 [Drosophila melanogaster]	27	1273	0.725	0.244746	-0.463947	0.611284
NP_001246470.1	inaD	inactivation no afterpotential D, isoform B [Drosophila melanogaster]	27	686	2.339	0.000971819	1.22589	3.01241
NP_476566.1	Gpdh	glycerol 3 phosphate dehydrogenase, isoform C [Drosophila melanogaster]	27	353	0.724	0.124118	-0.465938	0.906164
NP_001163786.1	RhoGAP100F	Rho GTPase activating protein at 100F, isoform D [Drosophila melanogaster]	27	1866	1.981	0.0235956	0.986229	1.62717
NP_996433.1	yl	yolkless, isoform B [Drosophila melanogaster]	27	1984	0.173	0.00141879	-2.53116	2.84808
NP_524601.2	Alp4	alkaline phosphatase 4, isoform A [Drosophila melanogaster]	27	596	0.425	0.0232484	-1.23447	1.63361
NP_648895.1	TyrRS	Tyrosyl-tRNA synthetase [Drosophila melanogaster]	27	525	0.925	0.708334	-0.112475	0.149762
NP_001261404.1	Rop	Ras opposite, isoform B [Drosophila melanogaster]	27	597	1.214	0.103965	0.279768	0.983111
NP_001033891.1	RpL13	ribosomal protein L13, isoform B [Drosophila melanogaster]	27	218	1.162	0.71274	0.21661	0.147069
NP_573066.1	Tcp-1zeta	T-cp1zeta [Drosophila melanogaster]	27	533	1.289	0.702471	0.366252	0.153372
NP_476906.1	Crys	crystallin, isoform A [Drosophila melanogaster]	27	477	1.473	0.161502	0.558757	0.791822
NP_001163012.2	l(2)37Cc	lethal (2) 37Cc, isoform D [Drosophila melanogaster]	27	276	0.649	0.1176	-0.62371	0.929593
NP_477033.1	Tig	tiggrin, isoform A [Drosophila melanogaster]	27	2188	1.064	0.969446	0.0894982	0.0134764
NP_001260290.1	Aldh	aldehyde dehydrogenase, isoform B [Drosophila melanogaster]	27	520	0.672	0.215433	-0.573467	0.666688
NP_651221.1	CG6178	CG6178 [Drosophila melanogaster]	27	544	0.965	0.999389	-0.0513992	0.000265505
NP_723896.1	vig	vasa intronic gene, isoform B [Drosophila melanogaster]	27	490	5.324	0.00347195	2.41251	2.45943
NP_001262379.1	bel	belle, isoform B [Drosophila melanogaster]	27	801	1.267	0.790302	0.341417	0.102207
NP_001260222.1	poe	purity of essence, isoform B [Drosophila melanogaster]	27	5322	2.278	0.0186774	1.18777	1.72868
NP_723104.2	Hsp60C	heat shock protein 60C, isoform A [Drosophila melanogaster]	26	576	7.851	0.00103954	2.97288	2.98316
NP_727108.1	l(1)G0255	lethal (1) G0255, isoform B [Drosophila melanogaster]	26	467	0.643	0.0344679	-0.637109	1.46259
NP_727374.1	Idgf4	imaginal disc growth factor 4, isoform B [Drosophila melanogaster]	26	442	1.582	0.54581	0.66175	0.262958
NP_001015405.3	FASN3	fatty acid synthase 3 [Drosophila melanogaster]	26	2394	0.565	0.0147136	-0.823677	1.83228
NP_610418.1	CG8258	CG8258 [Drosophila melanogaster]	26	546	1.194	0.964043	0.255803	0.0159034
NP_723468.1	jp	junctophilin, isoform B [Drosophila melanogaster]	26	1054	4.414	0.00232105	2.14209	2.63432
NP_651727.1	CG7834	CG7834, isoform A [Drosophila melanogaster]	26	253	0.564	0.00130198	-0.826233	2.8854
NP_651896.1	CG2118	CG2118, isoform A [Drosophila melanogaster]	26	698	0.846	0.60591	-0.24127	0.217592
NP_477049.2	Gp150	Gp150, isoform D [Drosophila melanogaster]	26	1076	1.362	0.032973	0.445727	1.48184
NP_476627.3	Mal-A1	maltase A1 [Drosophila melanogaster]	26	577	3.088	0.10151	1.62667	0.993491
NP_611853.2	CG2970	CG2970, isoform A [Drosophila melanogaster]	26	366	0.593	0.127072	-0.753896	0.895951
NP_650718.2	CG14309	uncharacterized protein Dmel_CG14309 [Drosophila melanogaster]	26	966	0.111	0.00393263	-3.17137	2.40532
NP_569845.2	CG17896	uncharacterized protein Dmel_CG17896, isoform B [Drosophila melanogaster]	26	520	0.674	0.00816186	-0.56918	2.08821
NP_524402.1	ATPsynD	ATP synthase, subunit D, isoform A [Drosophila melanogaster]	26	178	0.742	0.362722	-0.430509	0.440426
NP_001033943.2	NAT1	NAT1, isoform D [Drosophila melanogaster]	26	1488	2.25	0.0189661	1.16993	1.72202
NP_648884.1	Cpr72Ec	cuticular protein 72Ec [Drosophila melanogaster]	26	429	1.84	0.106259	0.879706	0.973636
NP_001247287.1	Esyt2	extended synaptotagmin-like protein 2, isoform C [Drosophila melanogaster]	26	853	2.803	0.000277759	1.48697	3.55633
NP_647808.1	CG14961	uncharacterized protein Dmel_CG14961 [Drosophila melanogaster]	26	914	10.239	0.00380032	3.356	2.42018
NP_608912.1	Cyp28d1	Cyp28d1 [Drosophila melanogaster]	26	502	1.828	0.00112005	0.870266	2.95076
NP_650572.2	Cctgamma	cctgamma, isoform A [Drosophila melanogaster]	26	544	1.753	0.00255794	0.809826	2.59211
NP_730941.1	Itp-r83A	inositol 1,4,5,-tris-phosphate receptor, isoform B [Drosophila melanogaster]	26	2837	1.508	0.017931	0.592636	1.7464
NP_001285378.1	ND-24	NADH dehydrogenase (ubiquinone) 24 kDa subunit, isoform B [Drosophila melanogaster]	26	242	0.628	0.0735079	-0.671164	1.13367
NP_477081.1	Idgf6	imaginal disc growth factor 6, isoform A [Drosophila melanogaster]	25	452	1.532	0.641408	0.615416	0.192866
NP_523868.1	Lsp1gamma	larval serum protein 1 gamma [Drosophila melanogaster]	25	772	8.075	0.002286	3.01346	2.64092
NP_610181.2	CG17337	uncharacterized protein Dmel_CG17337, isoform A [Drosophila melanogaster]	25	478	1.23	0.0430904	0.298658	1.36562
NP_722745.1	Got2	glutamate oxaloacetate transaminase 2, isoform B [Drosophila melanogaster]	25	431	0.523	0.0348192	-0.935117	1.45818
NP_477257.2	Idgf2	imaginal disc growth factor 2, isoform A [Drosophila melanogaster]	25	440	2.135	0.000140029	1.09424	3.85378
NP_523976.1	Arr2	arrestin 2 [Drosophila melanogaster]	25	401	0.949	0.995323	-0.07552	0.00203585
NP_001027395.1	Spn43Ab	serpin 43Ab [Drosophila melanogaster]	25	393	1.71	0.0204869	0.773996	1.68852
NP_649099.1	CG9629	CG9629 [Drosophila melanogaster]	25	540	0.964	0.997551	-0.0528949	0.00106505
NP_611979.1	pain	painless, isoform A [Drosophila melanogaster]	25	913	1.127	0.225746	0.172488	0.64638
NP_650328.1	CG3061	CG3061 [Drosophila melanogaster]	25	370	1.666	0.118832	0.736388	0.925068
NP_724293.2	CG9331	CG9331, isoform A [Drosophila melanogaster]	25	364	0.741	0.0429592	-0.432455	1.36694
NP_001104391.2	uex	unextended, isoform E [Drosophila melanogaster]	25	834	1.137	0.392728	0.185232	0.405908
NP_572320.2	Marf	mitochondrial assembly regulatory factor, isoform D [Drosophila melanogaster]	25	814	1.004	0.999999	0.00575927	5.70896e-07
NP_001027115.1	Hsp22	heat shock protein 22, isoform A [Drosophila melanogaster]	25	174	2.149	0.251922	1.10367	0.598733
NP_611353.1	CG5482	CG5482, isoform A [Drosophila melanogaster]	25	397	1.436	0.276006	0.522056	0.559081
NP_524219.1	alpha-Cat	alpha catenin, isoform A [Drosophila melanogaster]	25	917	2.187	0.00118766	1.12895	2.92531
NP_733230.1	CG12428	uncharacterized protein Dmel_CG12428, isoform A [Drosophila melanogaster]	25	618	1.038	0.999627	0.0538064	0.000162024
NP_727948.1	CG9911	CG9911, isoform D [Drosophila melanogaster]	25	412	0.974	0.999893	-0.0380063	4.64923e-05
NP_523886.1	RpL23A	ribosomal protein L23A [Drosophila melanogaster]	25	277	1.372	0.816447	0.45628	0.0880722
NP_001162875.1	Rtnl1	Reticulon-like1, isoform H [Drosophila melanogaster]	24	607	5.249	0.00118092	2.39204	2.92778
NP_731573.1	sals	sarcomere length short, isoform B [Drosophila melanogaster]	24	935	2.818	0.0389722	1.49467	1.40924
NP_476831.1	Mdr65	multi drug resistance 65 [Drosophila melanogaster]	24	1302	1.688	0.0312872	0.755315	1.50463
NP_651926.1	ND-49	NADH dehydrogenase (ubiquinone) 49 kDa subunit, isoform A [Drosophila melanogaster]	24	468	0.627	0.099741	-0.673463	1.00113
NP_001027175.1	sea	scheggia, isoform E [Drosophila melanogaster]	24	317	0.552	0.208975	-0.85726	0.679905
NP_523750.2	scb	scab, isoform B [Drosophila melanogaster]	24	1115	1.114	0.604968	0.155749	0.218267
NP_649008.2	NUCB1	NUCB1 [Drosophila melanogaster]	24	569	1.427	0.86497	0.512985	0.0629991
NP_608562.4	IA-2	IA-2 protein tyrosine phosphatase, isoform C [Drosophila melanogaster]	24	1319	2.12	0.00484081	1.08406	2.31508
NP_732652.1	CG31343	uncharacterized protein Dmel_CG31343 [Drosophila melanogaster]	24	961	0.186	0.00493906	-2.42663	2.30636
NP_524887.2	Gtp-bp	GTP-binding protein [Drosophila melanogaster]	24	614	1.419	0.169497	0.504875	0.770839
NP_729438.1	Galk	galactokinase, isoform A [Drosophila melanogaster]	24	490	1.5	0.15067	0.584963	0.821974
NP_651888.1	CG1910	CG1910, isoform A [Drosophila melanogaster]	24	489	1.64	0.545662	0.713696	0.263076
NP_609490.1	CG6230	CG6230 [Drosophila melanogaster]	24	1225	1.07	0.820771	0.0976108	0.0857781
NP_523735.2	Cp1	cysteine proteinase-1, isoform C [Drosophila melanogaster]	24	371	0.59	0.175426	-0.761213	0.755906
NP_524011.1	ATPsynB	ATP synthase, subunit B [Drosophila melanogaster]	24	243	0.381	0.351002	-1.39214	0.45469
NP_477134.1	RpL22	ribosomal protein L22 [Drosophila melanogaster]	24	299	1.306	0.913715	0.385155	0.0391893
NP_001247129.1	msps	mini spindles, isoform D [Drosophila melanogaster]	24	2082	1.361	0.295883	0.444667	0.52888
NP_524618.1	RpS3A	ribosomal protein S3A, isoform A [Drosophila melanogaster]	24	268	1.784	0.00811298	0.835116	2.09082
NP_001015316.1	CG17514	uncharacterized protein Dmel_CG17514, isoform A [Drosophila melanogaster]	24	2630	1.38	0.289215	0.464668	0.538779
NP_572302.2	Rbcn-3A	Rabconnectin-3A [Drosophila melanogaster]	24	3426	1.797	0.0304404	0.84559	1.51655
NP_647775.1	ND-30	NADH dehydrogenase (ubiquinone) 30 kDa subunit [Drosophila melanogaster]	24	265	0.737	0.586505	-0.440263	0.231728
NP_726025.1	Treh	trehalase, isoform C [Drosophila melanogaster]	24	596	0.6	0.317744	-0.736966	0.497923
NP_001259972.1	NTPase	NTPase, isoform F [Drosophila melanogaster]	24	524	1.23	0.0312427	0.298658	1.50525
NP_001260590.1	Tep4	Thioester-containing protein 4, isoform C [Drosophila melanogaster]	24	1498	0.659	0.0209025	-0.60165	1.6798
NP_733083.1	vig2	vig2, isoform B [Drosophila melanogaster]	24	443	2.312	0.173604	1.20914	0.760441
NP_524033.2	yps	ypsilon schachtel, isoform A [Drosophila melanogaster]	24	352	2.266	0.0301289	1.18015	1.52102
NP_649017.1	CG7430	CG7430, isoform A [Drosophila melanogaster]	24	504	0.81	0.341505	-0.304006	0.466603
NP_524286.1	D1	D1 chromosomal protein, isoform A [Drosophila melanogaster]	24	355	1.55	0.726534	0.632268	0.138744
NP_730957.1	Vha26	vacuolar H[+]-ATPase 26kD subunit, isoform A [Drosophila melanogaster]	24	226	0.395	0.221891	-1.34008	0.653861
NP_524776.1	ergic53	ergic53, isoform A [Drosophila melanogaster]	24	512	1.395	0.0305622	0.480265	1.51482
NP_650015.3	CG45076	uncharacterized protein Dmel_CG45076, isoform A [Drosophila melanogaster]	23	619	3.912	0.00528019	1.96791	2.27735
NP_524303.2	Irp-1B	iron regulatory protein 1B [Drosophila melanogaster]	23	899	1.35	0.511487	0.432959	0.291165
NP_477101.1	SdhB	succinate dehydrogenase, subunit B (iron-sulfur) [Drosophila melanogaster]	23	297	0.493	0.0615473	-1.02034	1.21079
NP_001259956.1	Pgk	phosphoglycerate kinase, isoform B [Drosophila melanogaster]	23	415	0.881	0.804883	-0.182786	0.094267
NP_524469.2	Rpt2	regulatory particle triple-A ATPase 2, isoform A [Drosophila melanogaster]	23	439	2.133	0.006068	1.09288	2.21695
NP_570027.1	ttm50	tiny tim 50, isoform A [Drosophila melanogaster]	23	428	1.017	0.999373	0.0243197	0.000272257
NP_608494.2	CG3164	CG3164, isoform B [Drosophila melanogaster]	23	698	1.288	0.387688	0.365133	0.411517
NP_477064.1	pnut	peanut, isoform A [Drosophila melanogaster]	23	539	1.826	0.0203003	0.868687	1.6925
NP_523724.2	Mdr49	multi drug resistance 49, isoform A [Drosophila melanogaster]	23	1302	0.705	0.194384	-0.504305	0.711339
NP_001285396.1	Vps4	vacuolar protein sorting 4, isoform B [Drosophila melanogaster]	23	442	2.108	0.000803026	1.07587	3.09527
NP_651391.1	tobi	target of brain insulin [Drosophila melanogaster]	23	657	6.926	0.00997701	2.79202	2.001
NP_723725.1	ThrRS	Threonyl-tRNA synthetase, isoform A [Drosophila melanogaster]	23	747	1.01	0.999991	0.0143553	4.07462e-06
NP_651578.1	CG5590	CG5590 [Drosophila melanogaster]	23	412	1.734	0.144266	0.794104	0.840836
NP_001246118.1	Dap160	dynamin associated protein 160, isoform D [Drosophila melanogaster]	23	1190	2.008	0.0145131	1.00576	1.83824
NP_001163144.1	EfTuM	elongation factor Tu mitochondrial, isoform B [Drosophila melanogaster]	23	489	1.25	0.398248	0.321928	0.399847
NP_649950.1	CG8507	CG8507 [Drosophila melanogaster]	23	379	0.969	0.999986	-0.0454314	6.07852e-06
NP_477354.1	Hop	Hsp70/Hsp90 organizing protein [Drosophila melanogaster]	23	490	1.954	0.00438614	0.96643	2.35792
NP_788622.1	Mical	molecule interacting with CasL, isoform C [Drosophila melanogaster]	23	4723	5.394	0.00496862	2.43136	2.30376
NP_650318.1	Dip-B	dipeptidase B, isoform A [Drosophila melanogaster]	23	508	0.802	0.0550657	-0.318326	1.25912
NP_599138.3	Dhod	dihydroorotate dehydrogenase, isoform D [Drosophila melanogaster]	23	405	0.611	0.00146547	-0.710756	2.83402
NP_650283.1	Droj2	DnaJ-like-2, isoform A [Drosophila melanogaster]	23	403	1.517	0.124263	0.601221	0.905658
NP_476722.1	shg	shotgun [Drosophila melanogaster]	23	1507	1.191	0.27767	0.252173	0.556471
NP_648273.1	Srp68	signal recognition particle protein 68 [Drosophila melanogaster]	23	604	1.226	0.461573	0.293959	0.33576
NP_524613.1	FeCH	ferrochelatase, isoform A [Drosophila melanogaster]	23	384	1.087	0.990703	0.120352	0.00405671
NP_001247017.1	Fmr1	Fmr1, isoform G [Drosophila melanogaster]	23	729	2.129	0.0187459	1.09018	1.72709
NP_724181.1	CG17544	uncharacterized protein Dmel_CG17544, isoform C [Drosophila melanogaster]	23	693	0.461	0.0377624	-1.11716	1.42294
NP_001245953.1	Gdi	GDP dissociation inhibitor, isoform B [Drosophila melanogaster]	23	443	1.17	0.0823849	0.226509	1.08415
NP_611562.2	CG44245	uncharacterized protein Dmel_CG44245, isoform A [Drosophila melanogaster]	23	436	2.494	0.0222617	1.31846	1.65244
NP_724569.1	didum	dilute class unconventional myosin, isoform C [Drosophila melanogaster]	23	1800	1.064	0.981016	0.0894982	0.00832397
NP_610184.2	Gp210	glycoprotein 210 kDa, isoform A [Drosophila melanogaster]	23	1876	0.65	0.124746	-0.621488	0.903974
NP_001260072.1	vkg	viking, isoform C [Drosophila melanogaster]	23	1940	1.55	0.379694	0.632268	0.420566
NP_572524.1	CG7033	CG7033 [Drosophila melanogaster]	23	535	1.296	0.320558	0.374066	0.494093
NP_650786.2	CG11779	uncharacterized protein Dmel_CG11779, isoform A [Drosophila melanogaster]	23	459	1.165	0.344334	0.22033	0.46302
NP_477375.1	Ef1alpha48D	elongation factor 1alpha48D, isoform A [Drosophila melanogaster]	22	463	1.033	0.999075	0.0468403	0.000401823
NP_001285657.1	ND-51	NADH dehydrogenase (ubiquinone) 51 kDa subunit, isoform B [Drosophila melanogaster]	22	474	0.548	0.00839229	-0.867752	2.07612
NP_729787.2	Nrx-IV	neurexin IV, isoform B [Drosophila melanogaster]	22	1284	1.62	0.00872809	0.695994	2.05908
NP_572988.1	pdgy	pudgy, isoform A [Drosophila melanogaster]	22	597	1.198	0.538066	0.260628	0.269164
NP_524858.1	Pep	protein on ecdysone puffs, isoform B [Drosophila melanogaster]	22	716	1.203	0.853715	0.266637	0.0686873
NP_726062.2	CG9485	CG9485, isoform B [Drosophila melanogaster]	22	1629	1.573	0.0668619	0.653519	1.17482
NP_001285253.1	CG9512	CG9512, isoform B [Drosophila melanogaster]	22	623	0.733	0.573189	-0.448115	0.241702
NP_001285923.1	bgm	bubblegum, isoform C [Drosophila melanogaster]	22	666	0.511	0.0785536	-0.968605	1.10483
NP_650189.1	Cyp9f2	Cyp9f2 [Drosophila melanogaster]	22	516	0.685	0.0826681	-0.545824	1.08266
NP_647880.1	CG1309	CG1309 [Drosophila melanogaster]	22	524	1.366	0.0149177	0.449957	1.8263
NP_996412.1	CG1561	CG1561 [Drosophila melanogaster]	22	635	0.946	0.921933	-0.0800879	0.0353006
NP_476664.2	Ote	otefin [Drosophila melanogaster]	22	424	1.57	0.529166	0.650765	0.276408
NP_726187.1	wdp	windpipe, isoform A [Drosophila melanogaster]	22	677	1.696	0.0198548	0.762136	1.70213
NP_523377.1	r	rudimentary, isoform A [Drosophila melanogaster]	22	2224	1.98	0.0264468	0.9855	1.57763
NP_652604.2	c12.2	c12.2, isoform A [Drosophila melanogaster]	22	1386	0.727	0.119746	-0.459973	0.921739
NP_001246063.1	GCS2beta	glucosidase 2 beta subunit, isoform B [Drosophila melanogaster]	22	548	1.139	0.988096	0.187768	0.00520086
NP_651876.1	RpL6	ribosomal protein L6, isoform B [Drosophila melanogaster]	22	262	0.995	1	-0.00723157	3.23423e-08
NP_610687.1	Egm	enigma [Drosophila melanogaster]	22	639	0.939	0.995018	-0.0908029	0.00216921
NP_572669.2	Myo10A	myosin 10A, isoform C [Drosophila melanogaster]	22	3054	4.211	0.000423915	2.07416	3.37272
NP_611242.1	eIF3-S8	eIF3-S8, isoform A [Drosophila melanogaster]	22	910	1.509	0.263461	0.593593	0.579284
NP_477473.1	Rpt1	regulatory particle triple-A ATPase 1 [Drosophila melanogaster]	22	433	2.412	0.00648253	1.27023	2.18826
NP_726720.3	CG3638	CG3638, isoform G [Drosophila melanogaster]	22	1472	1.738	0.0345934	0.797428	1.46101
NP_001262024.1	CG3961	CG3961, isoform E [Drosophila melanogaster]	22	666	1.355	0.0457738	0.438293	1.33938
NP_728841.2	RpL28	ribosomal protein L28, isoform G [Drosophila melanogaster]	22	144	0.913	0.947774	-0.131313	0.0232952
NP_001286077.1	CG10639	uncharacterized protein Dmel_CG10639, isoform C [Drosophila melanogaster]	22	455	1.002	1	0.00288251	7.58191e-08
NP_572181.4	l(1)G0334	lethal (1) G0334, isoform A [Drosophila melanogaster]	22	399	0.665	0.471913	-0.588574	0.326139
NP_001162765.1	MSBP	membrane steroid binding protein, isoform B [Drosophila melanogaster]	22	248	1.064	0.713294	0.0894982	0.146731
NP_726217.2	CG2852	CG2852, isoform D [Drosophila melanogaster]	22	205	1.165	0.966406	0.22033	0.0148403
NP_001260388.1	Vha100-5	vacuolar H[+] ATPase 100kD subunit 5, isoform B [Drosophila melanogaster]	22	814	0.277	0.0111207	-1.85204	1.95387
NP_727588.2	regucalcin	regucalcin, isoform D [Drosophila melanogaster]	22	319	1.09	0.960037	0.124328	0.0177121
NP_001246589.1	Usp5	ubiquitin specific protease 5, isoform B [Drosophila melanogaster]	22	827	1.176	0.395435	0.233888	0.402925
NP_001246678.1	CG43078	uncharacterized protein Dmel_CG43078, isoform H [Drosophila melanogaster]	21	2540	2.746	0.0121561	1.45733	1.91521
NP_648040.1	CG10226	uncharacterized protein Dmel_CG10226, isoform A [Drosophila melanogaster]	21	1320	0.864	0.818357	-0.210897	0.0870573
NP_001245946.1	Glt	glutactin, isoform D [Drosophila melanogaster]	21	1026	1.238	0.168637	0.308011	0.773047
NP_524614.2	mod	modulo, isoform A [Drosophila melanogaster]	21	542	0.678	0.11237	-0.560643	0.949349
NP_001015389.1	Scp1	sarcoplasmic calcium-binding protein 1, isoform A [Drosophila melanogaster]	21	189	0.661	0.877665	-0.597278	0.0566714
NP_726121.3	CG13492	uncharacterized protein Dmel_CG13492 [Drosophila melanogaster]	21	2979	0.317	0.00481203	-1.65745	2.31767
NP_476779.1	Uro	urate oxidase [Drosophila melanogaster]	21	352	0.185	0.000120908	-2.4344	3.91755
NP_649765.1	CG7910	CG7910, isoform A [Drosophila melanogaster]	21	530	0.549	0.0843181	-0.865122	1.07408
NP_001285513.1	CG34120	uncharacterized protein Dmel_CG34120, isoform E [Drosophila melanogaster]	21	1998	1.175	0.748785	0.232661	0.125643
NP_476632.1	RpS3	ribosomal protein S3, isoform A [Drosophila melanogaster]	21	246	1.219	0.955266	0.285698	0.0198758
NP_477377.1	CG4882	CG4882, isoform A [Drosophila melanogaster]	21	406	0.579	0.0191985	-0.788365	1.71673
NP_001261140.1	jbug	jitterbug, isoform N [Drosophila melanogaster]	21	2990	2.044	0.00429266	1.0314	2.36727
NP_001260427.1	Tor	target of rapamycin, isoform B [Drosophila melanogaster]	21	2471	1.305	0.405604	0.38405	0.391898
NP_001260191.1	CG5177	CG5177, isoform B [Drosophila melanogaster]	21	276	1.57	0.777928	0.650765	0.10906
NP_523476.1	mRpL24	mitochondrial ribosomal protein L24 [Drosophila melanogaster]	21	247	1.018	0.999527	0.0257376	0.000205527
NP_648165.1	CG8042	CG8042 [Drosophila melanogaster]	21	656	2.564	0.00111818	1.3584	2.95149
NP_001033870.1	capt	capulet, isoform B [Drosophila melanogaster]	21	783	1.854	0.0242003	0.890641	1.61618
NP_608978.2	Gal	beta galactosidase, isoform A [Drosophila melanogaster]	21	672	2.221	0.0233689	1.15121	1.63136
NP_996002.2	CG18769	uncharacterized protein Dmel_CG18769, isoform G [Drosophila melanogaster]	21	443	1.707	0.0236545	0.771463	1.62609
NP_995838.1	CG7639	CG7639 [Drosophila melanogaster]	21	443	0.855	0.760152	-0.226004	0.1191
NP_610075.2	Mtp	microsomal triacylglycerol transfer protein [Drosophila melanogaster]	21	886	0.855	0.91649	-0.226004	0.0378721
NP_524211.1	RpLP0	ribosomal protein LP0, isoform A [Drosophila melanogaster]	21	317	0.749	0.273822	-0.416962	0.562532
NP_610764.1	CG8839	CG8839, isoform A [Drosophila melanogaster]	21	529	1.318	0.109096	0.39835	0.962193
NP_524182.3	Ide	insulin degrading metalloproteinase [Drosophila melanogaster]	21	990	0.927	0.785489	-0.109359	0.10486
NP_572836.1	CG32649	uncharacterized protein Dmel_CG32649 [Drosophila melanogaster]	21	661	0.815	0.267816	-0.295128	0.572163
NP_611095.1	clu	clueless, isoform A [Drosophila melanogaster]	21	1448	2.525	0.0110264	1.33628	1.95757
NP_649757.1	CG2767	CG2767 [Drosophila melanogaster]	21	329	1.176	0.194584	0.233888	0.710894
NP_001285794.1	RpL7	ribosomal protein L7, isoform B [Drosophila melanogaster]	21	252	0.945	0.985889	-0.0816138	0.00617205
NP_608354.1	Pmp70	peroxisomal membrane protein 70 kDa, isoform A [Drosophila melanogaster]	21	665	0.445	0.0915256	-1.16812	1.03846
NP_649069.2	CG3902	CG3902 [Drosophila melanogaster]	21	414	0.626	0.0150871	-0.675765	1.82139
NP_727353.1	LysRS	Lysyl-tRNA synthetase, isoform B [Drosophila melanogaster]	21	607	1.187	0.173243	0.24732	0.761345
NP_001285757.1	CG13096	uncharacterized protein Dmel_CG13096, isoform B [Drosophila melanogaster]	21	681	0.659	0.23654	-0.60165	0.626096
NP_611460.1	CG11208	uncharacterized protein Dmel_CG11208 [Drosophila melanogaster]	21	568	0.83	0.76888	-0.268817	0.114141
NP_724350.1	Df31	decondensation factor 31, isoform B [Drosophila melanogaster]	21	183	0.809	0.970485	-0.305788	0.0130111
NP_649835.1	Tcp-1eta	Tcp-1eta [Drosophila melanogaster]	21	544	1.497	0.240704	0.582074	0.618517
NP_651838.1	l(3)03670	lethal (3) 03670 [Drosophila melanogaster]	21	223	1.01	0.999999	0.0143553	5.2395e-07
NP_727320.1	su(r)	suppressor of rudimentary [Drosophila melanogaster]	21	1031	0.955	0.946488	-0.0664274	0.0238849
NP_649916.1	P58IPK	P58IPK [Drosophila melanogaster]	21	498	0.784	0.827401	-0.351074	0.082284
NP_001188684.1	CG3609	CG3609, isoform B [Drosophila melanogaster]	21	335	1.094	0.907828	0.129613	0.0419963
NP_610156.1	CG3107	CG3107, isoform A [Drosophila melanogaster]	21	1034	0.368	0.00145022	-1.44222	2.83857
NP_001261775.1	tral	trailer hitch, isoform H [Drosophila melanogaster]	21	657	0.559	0.399385	-0.83908	0.398608
NP_787968.1	LeuRS	Leucyl-tRNA synthetase, isoform A [Drosophila melanogaster]	21	1182	1.292	0.593024	0.369606	0.226928
NP_524474.1	Hsp68	heat shock protein 68 [Drosophila melanogaster]	20	635	7.667	0.00236606	2.93866	2.62597
NP_609215.3	CG7627	CG7627, isoform A [Drosophila melanogaster]	20	1355	0.586	0.000878722	-0.771027	3.05615
NP_611468.1	CG9090	CG9090, isoform A [Drosophila melanogaster]	20	374	0.63	0.152421	-0.666576	0.816954
NP_650273.2	CG8773	CG8773 [Drosophila melanogaster]	20	994	0.211	0.00861828	-2.24469	2.06458
NP_611341.1	CG10924	uncharacterized protein Dmel_CG10924, isoform A [Drosophila melanogaster]	20	638	2.361	0.000345551	1.2394	3.46149
NP_523740.3	Mdr50	multi drug resistance 50 [Drosophila melanogaster]	20	1313	0.353	0.000868598	-1.50226	3.06118
NP_611140.3	CG8306	CG8306 [Drosophila melanogaster]	20	516	1.487	0.0765447	0.572405	1.11608
NP_651269.1	CG5789	CG5789, isoform A [Drosophila melanogaster]	20	1402	0.971	0.996163	-0.0424568	0.0016694
NP_001246928.1	mtd	mustard, isoform V [Drosophila melanogaster]	20	1344	1.308	0.290803	0.387363	0.536401
NP_651400.1	CG5112	CG5112 [Drosophila melanogaster]	20	523	1.278	0.232329	0.353888	0.633897
NP_001261867.1	GlyRS	Glycyl-tRNA synthetase, isoform C [Drosophila melanogaster]	20	765	1.197	0.547336	0.259423	0.261746
NP_727094.1	RpL7A	ribosomal protein L7A, isoform A [Drosophila melanogaster]	20	271	1.112	0.96877	0.153157	0.0137794
NP_524449.1	Nrx-1	neurexin 1, isoform A [Drosophila melanogaster]	20	1837	1.51	0.1302	0.594549	0.885389
NP_001285427.1	CG7556	CG7556, isoform B [Drosophila melanogaster]	20	522	2.213	0.00679357	1.146	2.1679
NP_609496.1	CG6287	CG6287 [Drosophila melanogaster]	20	332	1.084	0.786604	0.116365	0.104244
NP_723603.1	CG31872	uncharacterized protein Dmel_CG31872, isoform A [Drosophila melanogaster]	20	1073	3.023	0.0016651	1.59598	2.77856
NP_730054.1	AGO2	argonaute 2, isoform C [Drosophila melanogaster]	20	1217	1.788	0.0748141	0.838347	1.12602
NP_725073.1	wal	walrus, isoform A [Drosophila melanogaster]	20	330	0.838	0.380883	-0.254978	0.419209
489201354		MULTISPECIES: lysyl endopeptidase [Pseudomonas]	20	462	1.383	0.933455	0.467801	0.0299064
NP_729246.2	pst	pastrel, isoform F [Drosophila melanogaster]	20	707	1.269	0.301616	0.343692	0.520546
NP_651963.1	Sucb	sucb, isoform A [Drosophila melanogaster]	20	416	1.853	0.115151	0.889863	0.938732
NP_524450.2	T-cp1	Tcp1-like, isoform A [Drosophila melanogaster]	20	557	1.284	0.737736	0.360645	0.132099
NP_001246637.1	Cyt-c1	cytochrome c1, isoform B [Drosophila melanogaster]	20	307	0.578	0.0665786	-0.790859	1.17667
NP_611548.1	CG9394	CG9394, isoform A [Drosophila melanogaster]	20	679	0.737	0.124201	-0.440263	0.905876
NP_729118.1	Rcc1	regulator of chromosome condensation 1, isoform B [Drosophila melanogaster]	20	547	0.606	0.354936	-0.72261	0.44985
NP_572826.1	ade5	ade5, isoform A [Drosophila melanogaster]	20	429	1.512	0.408357	0.596458	0.38896
NP_611382.1	MetRS	Methionyl-tRNA synthetase [Drosophila melanogaster]	20	1022	2.212	0.00929285	1.14535	2.03185
NP_608578.1	CG5080	CG5080, isoform B [Drosophila melanogaster]	20	554	1.845	0.00158139	0.883621	2.80096
NP_511152.2	mRpL38	mitochondrial ribosomal protein L38 [Drosophila melanogaster]	20	416	1.26	0.81762	0.333424	0.0874486
NP_651416.1	CG5028	CG5028, isoform A [Drosophila melanogaster]	20	402	2.113	0.0106437	1.07929	1.97291
NP_001285925.1	CG15293	uncharacterized protein Dmel_CG15293, isoform C [Drosophila melanogaster]	20	333	1.628	0.142131	0.703101	0.847311
NP_609694.1	Cyp28a5	Cyp28a5 [Drosophila melanogaster]	20	505	0.954	0.987837	-0.0679388	0.00531473
NP_523802.1	Acox57D-p	acyl-Coenzyme A oxidase at 57D proximal, isoform A [Drosophila melanogaster]	20	677	1.96	0.161544	0.970854	0.791709
NP_001189276.1	Syx1A	syntaxin 1A, isoform B [Drosophila melanogaster]	20	296	1.563	0.050435	0.644318	1.29727
NP_609579.1	CG5525	CG5525 [Drosophila melanogaster]	20	533	1.754	0.0259743	0.810649	1.58546
NP_001015319.1	eIF-4B	eukaryotic initiation factor 4B, isoform B [Drosophila melanogaster]	20	459	1.426	0.292711	0.511974	0.533561
NP_650843.1	CG4538	CG4538, isoform A [Drosophila melanogaster]	20	673	1.505	0.0374296	0.589763	1.42679
NP_611563.1	CG4302	CG4302 [Drosophila melanogaster]	20	532	0.561	0.096846	-0.833927	1.01392
NP_649517.1	CG2604	CG2604, isoform A [Drosophila melanogaster]	20	430	0.688	0.035321	-0.53952	1.45197
NP_523503.2	ninaC	neither inactivation nor afterpotential C, isoform B [Drosophila melanogaster]	19	1501	2.185	0.0616172	1.12763	1.2103
NP_001286613.1	CalpA	Calpain-A, isoform D [Drosophila melanogaster]	19	843	1.581	0.00466033	0.660837	2.33158
NP_650274.2	CG8774	CG8774, isoform A [Drosophila melanogaster]	19	942	0.274	0.00249697	-1.86775	2.60259
NP_610382.2	Mal-A5	maltase A5, isoform A [Drosophila melanogaster]	19	630	0.888	0.957408	-0.171368	0.0189028
NP_524464.1	Rpt5	regulatory particle triple-A ATPase 5 [Drosophila melanogaster]	19	428	1.854	0.0360186	0.890641	1.44347
NP_620470.1	26-29-p	26-29kD-proteinase [Drosophila melanogaster]	19	549	0.757	0.278193	-0.401635	0.555655
NP_651621.2	CG12413	uncharacterized protein Dmel_CG12413 [Drosophila melanogaster]	19	696	0.647	0.13023	-0.628162	0.885288
NP_476602.1	Gli	gliotactin, isoform A [Drosophila melanogaster]	19	956	3.478	0.00336708	1.79826	2.47275
NP_524174.1	fln	flightin, isoform A [Drosophila melanogaster]	19	182	6.089	0.000301624	2.60621	3.52053
NP_001262624.1	gish	gilgamesh, isoform L [Drosophila melanogaster]	19	537	1.339	0.124174	0.421156	0.905968
NP_001247269.1	CG34355	uncharacterized protein Dmel_CG34355, isoform E [Drosophila melanogaster]	19	755	3.297	0.00213834	1.72115	2.66992
NP_726543.1	CG2316	CG2316, isoform C [Drosophila melanogaster]	19	730	0.848	0.923772	-0.237864	0.0344354
NP_001260561.1	AsnRS	Asparaginyl-tRNA synthetase, isoform B [Drosophila melanogaster]	19	558	0.977	0.999457	-0.0335695	0.000235816
NP_610467.1	Rme-8	receptor mediated endocytosis 8, isoform A [Drosophila melanogaster]	19	2408	1.313	0.254996	0.392867	0.593466
NP_001263058.1	Rpn2	regulatory particle non-ATPase 2, isoform C [Drosophila melanogaster]	19	1020	1.937	0.0217085	0.953824	1.66337
NP_648642.1	flr	flare, isoform A [Drosophila melanogaster]	19	608	1.157	0.403173	0.210389	0.394509
NP_524675.1	Pgm	phosphoglucose mutase [Drosophila melanogaster]	19	560	1.259	0.044443	0.332278	1.3522
NP_723966.1	Idgf3	imaginal disc growth factor 3, isoform B [Drosophila melanogaster]	19	441	2.262	0.131115	1.1776	0.882349
NP_608525.1	shv	shriveled [Drosophila melanogaster]	19	354	1.13	0.983235	0.176323	0.00734283
NP_652724.1	CG3267	CG3267 [Drosophila melanogaster]	19	578	0.784	0.244815	-0.351074	0.611163
NP_572707.4	GCS1	glucosidase 1, isoform B [Drosophila melanogaster]	19	849	1.154	0.318682	0.206643	0.496643
NP_727251.1	Trxr-1	thioredoxin reductase-1, isoform B [Drosophila melanogaster]	19	596	0.683	0.000392068	-0.550043	3.40664
NP_523997.1	Hsp26	heat shock protein 26, isoform A [Drosophila melanogaster]	19	208	0.701	0.314683	-0.512514	0.502127
NP_524105.2	Pdh	photoreceptor dehydrogenase, isoform A [Drosophila melanogaster]	19	278	1.072	0.958748	0.100305	0.0182955
NP_788655.1	mfas	midline fasciclin, isoform J [Drosophila melanogaster]	19	905	1.135	0.711981	0.182692	0.147532
NP_001263106.1	Fer2LCH	ferritin 2 light chain homologue, isoform E [Drosophila melanogaster]	19	236	0.771	0.666667	-0.375197	0.176091
NP_477159.1	Hmu	hemomucin [Drosophila melanogaster]	19	579	1.303	0.0799142	0.381837	1.09738
NP_477008.1	Trp1	translocation protein 1, isoform A [Drosophila melanogaster]	19	415	1.648	0.0661409	0.720716	1.17953
NP_729086.1	DnaJ-1	DnaJ-like-1, isoform B [Drosophila melanogaster]	19	334	2.034	0.0249237	1.02432	1.60339
NP_651000.1	CG6439	CG6439, isoform A [Drosophila melanogaster]	19	370	2.308	0.00454609	1.20664	2.34236
NP_001163112.1	whd	withered, isoform D [Drosophila melanogaster]	19	782	1.285	0.0993794	0.361768	1.0027
NP_476667.1	pAbp	poly(A) binding protein, isoform A [Drosophila melanogaster]	19	634	1.892	0.0152674	0.919912	1.81624
NP_523663.1	Pgi	phosphoglucose isomerase, isoform A [Drosophila melanogaster]	19	558	0.783	0.893375	-0.352916	0.0489663
NP_001284987.1	CG10932	uncharacterized protein Dmel_CG10932, isoform B [Drosophila melanogaster]	19	410	1.191	0.686268	0.252173	0.163506
NP_001287175.1	Hcs	holocarboxylase synthetase, isoform C [Drosophila melanogaster]	19	1047	3.865	0.00305884	1.95047	2.51444
NP_001285979.1	CaBP1	calcium-binding protein 1, isoform B [Drosophila melanogaster]	19	433	0.957	0.999884	-0.0634092	5.04325e-05
NP_730790.2	Gel	gelsolin, isoform D [Drosophila melanogaster]	19	798	1.745	0.00976413	0.803227	2.01037
NP_001285439.1	NAA15-16	N(alpha)-acetyltransferase 15/16, isoform B [Drosophila melanogaster]	19	890	1.314	0.702267	0.393965	0.153498
NP_001260335.1	CG33303	uncharacterized protein Dmel_CG33303, isoform B [Drosophila melanogaster]	19	458	1.123	0.618306	0.167358	0.208797
NP_732553.2	CG31195	uncharacterized protein Dmel_CG31195 [Drosophila melanogaster]	19	807	2.12	0.00327671	1.08406	2.48456
NP_523817.1	Fib	fibrillarin [Drosophila melanogaster]	19	344	1.061	0.992698	0.0854247	0.0031827
NP_001096916.1	rdgA	retinal degeneration A, isoform B [Drosophila melanogaster]	19	1027	2.389	0.0258566	1.25641	1.58743
NP_610443.1	PPO2	prophenoloxidase 2 [Drosophila melanogaster]	19	684	2.444	0.0014922	1.28924	2.82617
NP_511073.1	RpS6	ribosomal protein S6, isoform B [Drosophila melanogaster]	19	248	1.431	0.028005	0.517024	1.55276
NP_609150.2	LKRSDH	lysine ketoglutarate reductase/saccharopine dehydrogenase, isoform A [Drosophila melanogaster]	19	928	1.705	0.0515438	0.769772	1.28782
NP_649685.1	CG1979	CG1979 [Drosophila melanogaster]	19	1047	10.787	0.000114506	3.43122	3.94117
NP_609394.1	Mdh1	malate dehydrogenase 1, isoform A [Drosophila melanogaster]	19	337	0.877	0.969056	-0.189351	0.0136512
NP_788676.1	Nsf2	N-ethylmaleimide-sensitive factor 2, isoform A [Drosophila melanogaster]	18	752	1.175	0.902714	0.232661	0.0444499
NP_609253.1	LManVI	lysosomal alpha-mannosidase VI [Drosophila melanogaster]	18	1007	0.394	0.0351024	-1.34373	1.45466
NP_001246757.1	Mpcp	mitochondrial phosphate carrier protein, isoform C [Drosophila melanogaster]	18	356	0.519	0.0473768	-0.946194	1.32443
NP_610310.2	CG2064	CG2064 [Drosophila melanogaster]	18	330	0.844	0.884715	-0.244685	0.0531965
NP_650503.1	Hmt-1	heavy metal tolerance factor 1 [Drosophila melanogaster]	18	866	0.776	0.0857763	-0.365871	1.06663
NP_523905.2	Scsalpha	succinyl coenzyme A synthetase alpha subunit, isoform A [Drosophila melanogaster]	18	328	1.2	0.842599	0.263034	0.0743789
NP_001285801.1	nmd	no mitochondrial derivative, isoform C [Drosophila melanogaster]	18	369	1.087	0.803566	0.120352	0.0949787
NP_788764.1	Tpi	triose phosphate isomerase, isoform A [Drosophila melanogaster]	18	348	0.769	0.57068	-0.378944	0.243607
NP_001027180.1	fabp	fatty acid binding protein, isoform B [Drosophila melanogaster]	18	130	0.776	0.61707	-0.365871	0.209665
NP_001259946.1	Drp1	dynamin related protein 1, isoform B [Drosophila melanogaster]	18	735	2.081	0.0104123	1.05728	1.98245
NP_648357.1	CG8177	CG8177, isoform A [Drosophila melanogaster]	18	1268	0.907	0.95049	-0.140826	0.0220524
NP_723992.1	VhaSFD	vacuolar H[+]-ATPase SFD subunit, isoform B [Drosophila melanogaster]	18	542	0.469	0.272734	-1.09234	0.564261
NP_001260350.1	LManI	lysosomal alpha-mannosidase I, isoform B [Drosophila melanogaster]	18	950	0.479	0.0182266	-1.0619	1.73929
NP_651274.1	atl	atlastin, isoform A [Drosophila melanogaster]	18	541	0.889	0.908456	-0.169745	0.0416963
NP_651703.1	CG1907	CG1907 [Drosophila melanogaster]	18	317	0.726	0.298643	-0.461959	0.524848
NP_733356.2	RpS7	ribosomal protein S7, isoform E [Drosophila melanogaster]	18	194	1.022	0.999989	0.0313952	4.9655e-06
NP_724679.2	Mal-A6	maltase A6, isoform D [Drosophila melanogaster]	18	601	5.009	0.0509	2.32452	1.29328
NP_001259136.1	CG32809	uncharacterized protein Dmel_CG32809, isoform I [Drosophila melanogaster]	18	1249	2.01	0.0270386	1.0072	1.56802
NP_001138060.1	CG42232	uncharacterized protein Dmel_CG42232 [Drosophila melanogaster]	18	3441	0.931	0.996398	-0.103147	0.00156713
NP_523400.1	betaCOP	coat protein (coatomer) beta [Drosophila melanogaster]	18	964	1.82	0.014624	0.863938	1.83493
NP_723806.1	CG31729	uncharacterized protein Dmel_CG31729, isoform A [Drosophila melanogaster]	18	1087	1.073	0.600555	0.10165	0.221447
NP_730196.1	Nrt	neurotactin, isoform A [Drosophila melanogaster]	18	846	2.869	0.00440239	1.52055	2.35631
NP_610854.1	CG4679	CG4679 [Drosophila melanogaster]	18	652	0.61	0.0488496	-0.713119	1.31114
NP_524816.1	Lsp2	larval serum protein 2, isoform A [Drosophila melanogaster]	18	701	1.122	0.990957	0.166073	0.00394506
NP_524719.1	ND-23	NADH dehydrogenase (ubiquinone) 23 kDa subunit [Drosophila melanogaster]	18	217	0.393	0.0244625	-1.3474	1.6115
NP_001260795.1	lig	lingerer, isoform K [Drosophila melanogaster]	18	1417	2.802	0.0275445	1.48646	1.55997
NP_524726.1	RpL8	ribosomal protein L8, isoform A [Drosophila melanogaster]	18	256	1.137	0.982256	0.185232	0.00777526
NP_001189251.1	CG42668	uncharacterized protein Dmel_CG42668, isoform K [Drosophila melanogaster]	18	956	1.768	0.000598512	0.822118	3.22293
NP_524370.2	blp	black pearl, isoform A [Drosophila melanogaster]	18	141	0.858	0.954588	-0.22095	0.0201843
NP_001285330.1	Rbp2	RNA-binding protein 2, isoform D [Drosophila melanogaster]	18	388	2.052	0.0811081	1.03703	1.09094
NP_001259597.1	CG42354	uncharacterized protein Dmel_CG42354, isoform F [Drosophila melanogaster]	18	503	3.84	0.0140884	1.94111	1.85114
NP_477392.1	scf	supercoiling factor, isoform A [Drosophila melanogaster]	18	329	3.708	0.073098	1.89064	1.13609
NP_611133.1	CG7813	CG7813 [Drosophila melanogaster]	18	734	8.663	0.000157968	3.11487	3.80143
NP_733183.1	CG31075	uncharacterized protein Dmel_CG31075, isoform A [Drosophila melanogaster]	18	485	2.657	0.000300347	1.4098	3.52238
NP_610603.2	CG12338	uncharacterized protein Dmel_CG12338, isoform A [Drosophila melanogaster]	18	335	0.143	0.000636722	-2.80591	3.19605
NP_651408.1	Ssadh	succinic semialdehyde dehydrogenase, isoform A [Drosophila melanogaster]	18	509	0.591	0.00492124	-0.75877	2.30793
NP_611685.1	RpS16	ribosomal protein S16, isoform A [Drosophila melanogaster]	18	148	1.124	0.983853	0.168642	0.00706985
NP_729078.1	Msr-110	Msr-110, isoform C [Drosophila melanogaster]	18	625	1.542	0.152074	0.624803	0.817946
NP_723479.1	Pka-C1	protein kinase, cAMP-dependent, catalytic subunit 1, isoform B [Drosophila melanogaster]	18	353	1.645	0.0270223	0.718088	1.56828
NP_523975.1	RpL14	ribosomal protein L14 [Drosophila melanogaster]	18	166	0.916	0.943941	-0.12658	0.0250553
NP_476631.1	RpL19	ribosomal protein L19, isoform A [Drosophila melanogaster]	18	203	1.116	0.948264	0.158337	0.0230707
NP_648451.1	Plod	procollagen lysyl hydroxylase, isoform A [Drosophila melanogaster]	18	721	2.737	0.0302851	1.4526	1.51877
NP_524284.1	mRpL19	mitochondrial ribosomal protein L19 [Drosophila melanogaster]	18	306	1.133	0.526569	0.180148	0.278545
NP_572756.3	ATP7	ATP7, isoform B [Drosophila melanogaster]	18	1254	1.53	0.0113038	0.613532	1.94678
NP_523378.2	if	inflated, isoform B [Drosophila melanogaster]	18	1396	1.992	0.00100796	0.994218	2.99656
NP_524048.2	Ptp69D	protein tyrosine phosphatase 69D, isoform A [Drosophila melanogaster]	18	1462	1.527	0.0174341	0.6107	1.7586
NP_647683.1	SCOT	Succinyl-CoA:3-ketoacid CoA transferase, isoform A [Drosophila melanogaster]	18	516	0.576	0.0520408	-0.795859	1.28366
NP_524061.1	DCTN1-p150	dynactin 1, p150 subunit [Drosophila melanogaster]	18	1265	1.935	0.0128854	0.952334	1.8899
NP_573303.1	Ggt-1	gamma-glutamyl transpeptidase, isoform A [Drosophila melanogaster]	18	579	0.634	0.00565009	-0.657445	2.24794
NP_724288.3	vari	varicose, isoform B [Drosophila melanogaster]	18	636	2.295	0.00263813	1.19849	2.5787
NP_001285121.1	Gs2	glutamine synthetase 2, isoform D [Drosophila melanogaster]	18	373	1.328	0.237724	0.409255	0.623928
NP_001036485.1	Dscam1	down syndrome cell adhesion molecule 1, isoform BB [Drosophila melanogaster]	18	2020	2.16	0.00257958	1.11103	2.58845
NP_722774.1	papi	papi, isoform B [Drosophila melanogaster]	18	576	1.528	0.00433028	0.611645	2.36348
NP_647779.2	CG14964	uncharacterized protein Dmel_CG14964 [Drosophila melanogaster]	18	1443	4.991	0.00885293	2.31933	2.05291
NP_609105.1	ico	iconoclast [Drosophila melanogaster]	18	745	0.452	0.00323197	-1.14561	2.49053
NP_476570.1	Gs1	glutamine synthetase 1, isoform B [Drosophila melanogaster]	18	399	1.207	0.742065	0.271426	0.129558
NP_001260426.1	Vha68-1	vacuolar H[+] ATPase 68kD subunit 1, isoform B [Drosophila melanogaster]	17	614	1.968	0.00265324	0.97673	2.57622
NP_788023.1	CG33129	uncharacterized protein Dmel_CG33129, isoform E [Drosophila melanogaster]	17	677	0.674	0.0329696	-0.56918	1.48189
NP_727519.1	dlg1	discs large 1, isoform F [Drosophila melanogaster]	17	816	3.249	0.00988631	1.7	2.00497
NP_524063.1	Hsc70-1	heat shock protein cognate 1, isoform A [Drosophila melanogaster]	17	641	2.124	0.0148077	1.08678	1.82951
NP_573131.1	Cnx14D	calnexin 14D [Drosophila melanogaster]	17	639	4.483	0.0208986	2.16446	1.67988
NP_648836.2	ATPsynbetaL	ATP synthase, beta subunit-like [Drosophila melanogaster]	17	622	5.674	0.00251447	2.50437	2.59955
NP_001247372.1	tmod	tropomodulin, isoform N [Drosophila melanogaster]	17	567	1.956	0.00665055	0.967906	2.17714
NP_523803.1	Acox57D-d	acyl-Coenzyme A oxidase at 57D distal [Drosophila melanogaster]	17	677	0.236	0.00278596	-2.08314	2.55502
NP_610383.1	Mal-A7	maltase A7, isoform A [Drosophila melanogaster]	17	599	3.058	0.106814	1.61259	0.971372
NP_523671.1	Pka-R2	protein kinase, cAMP-dependent, regulatory subunit type 2, isoform A [Drosophila melanogaster]	17	377	2.167	0.000806833	1.1157	3.09322
NP_726441.1	Slik	Sterile20-like kinase, isoform B [Drosophila melanogaster]	17	1703	1.286	0.348331	0.362891	0.458007
NP_001097498.1	ens	ensconsin, isoform F [Drosophila melanogaster]	17	1241	1.874	0.0839099	0.906121	1.07619
NP_610805.1	CG8778	CG8778 [Drosophila melanogaster]	17	299	0.962	0.905154	-0.0558912	0.0432775
NP_724828.1	hebe	hebe, isoform B [Drosophila melanogaster]	17	456	1.506	0.765193	0.590722	0.116229
NP_733237.1	mino	minotaur, isoform C [Drosophila melanogaster]	17	786	0.624	0.000912729	-0.680382	3.03966
NP_001260163.1	nrv1	nervana 1, isoform B [Drosophila melanogaster]	17	309	0.838	0.0592215	-0.254978	1.22752
NP_651003.1	Cchl	cytochrome c heme lyase, isoform A [Drosophila melanogaster]	17	281	2.231	0.00263331	1.15769	2.5795
NP_476778.1	RpS27A	ribosomal protein S27A [Drosophila melanogaster]	17	156	1.119	0.745326	0.16221	0.127654
NP_001246890.1	nrm	neuromusculin, isoform E [Drosophila melanogaster]	17	2192	1.7	0.0128564	0.765535	1.89088
NP_610523.2	CG1665	CG1665 [Drosophila melanogaster]	17	340	0.954	0.996787	-0.0679388	0.00139752
NP_001285124.1	Spase25	spase 25-subunit, isoform B [Drosophila melanogaster]	17	199	0.913	0.939579	-0.131313	0.0270666
NP_728267.1	Tao	Tao, isoform D [Drosophila melanogaster]	17	1039	1.799	0.0335025	0.847195	1.47492
NP_651027.1	CG7071	CG7071, isoform A [Drosophila melanogaster]	17	302	1.477	0.0292738	0.56267	1.53352
NP_728074.1	Fim	fimbrin, isoform D [Drosophila melanogaster]	17	641	0.481	0.0262781	-1.05589	1.58041
NP_727629.2	Tomosyn	tomosyn, isoform C [Drosophila melanogaster]	17	1470	2.038	0.00637176	1.02715	2.19574
NP_477271.1	Osbp	oxysterol binding protein [Drosophila melanogaster]	17	784	1.369	0.556949	0.453122	0.254185
NP_649253.1	Pex14	peroxin 14 [Drosophila melanogaster]	17	280	0.948	0.984142	-0.077041	0.00694243
NP_609032.1	mmy	mummy, isoform A [Drosophila melanogaster]	17	520	2.337	0.0290211	1.22466	1.53729
NP_524306.3	mRpL37	mitochondrial ribosomal protein L37 [Drosophila melanogaster]	17	408	1.053	0.937592	0.0745054	0.0279861
NP_523861.1	uzip	unzipped, isoform A [Drosophila melanogaster]	17	488	1.89	0.00271525	0.918386	2.56619
NP_996375.1	sdt	stardust, isoform D [Drosophila melanogaster]	17	879	1.448	0.160316	0.534062	0.795024
NP_651038.3	CG13850	uncharacterized protein Dmel_CG13850, isoform A [Drosophila melanogaster]	17	564	1.018	0.999966	0.0257376	1.47274e-05
NP_608924.1	CG12512	uncharacterized protein Dmel_CG12512 [Drosophila melanogaster]	17	593	0.62	0.110887	-0.68966	0.955119
NP_523367.2	nonA	no on or off transient A, isoform A [Drosophila melanogaster]	17	700	1.826	0.215627	0.868687	0.666298
NP_524546.2	Pglym78	phosphoglyceromutase, isoform A [Drosophila melanogaster]	17	255	1.046	0.991503	0.0648829	0.00370617
NP_649989.1	CG3999	CG3999, isoform A [Drosophila melanogaster]	17	985	0.875	0.830506	-0.192645	0.0806573
NP_730823.2	CG11739	uncharacterized protein Dmel_CG11739, isoform C [Drosophila melanogaster]	17	321	0.792	0.41279	-0.336428	0.384271
NP_001246198.1	CG14762	uncharacterized protein Dmel_CG14762, isoform B [Drosophila melanogaster]	17	498	1.268	0.687704	0.342555	0.162599
NP_001260155.1	Liprin-alpha	Liprin-alpha, isoform E [Drosophila melanogaster]	17	1214	2.015	0.0126358	1.01078	1.8984
NP_001261457.1	CG33523	uncharacterized protein Dmel_CG33523, isoform F [Drosophila melanogaster]	17	654	1.358	0.0479081	0.441483	1.31959
NP_726788.1	CG4199	CG4199, isoform C [Drosophila melanogaster]	17	593	1.773	0.0132009	0.826193	1.8794
NP_476964.1	RpS18	ribosomal protein S18, isoform A [Drosophila melanogaster]	17	152	1.777	0.685226	0.829444	0.164166
NP_001260557.1	Rpn3	regulatory particle non-ATPase 3, isoform B [Drosophila melanogaster]	17	494	1.204	0.870818	0.267835	0.0600724
NP_477395.1	alphaCOP	coat protein (coatomer) alpha, isoform A [Drosophila melanogaster]	17	1234	1.682	0.0335522	0.750178	1.47428
NP_001036391.2	RpL5	ribosomal protein L5, isoform H [Drosophila melanogaster]	17	299	0.811	0.549386	-0.302226	0.260122
NP_722715.1	RFeSP	rieske iron-sulfur protein, isoform B [Drosophila melanogaster]	17	230	0.649	0.0233817	-0.62371	1.63112
NP_650898.1	Srp72	signal recognition particle protein 72 [Drosophila melanogaster]	17	650	1.407	0.0479769	0.492622	1.31897
NP_727992.1	RpS19a	ribosomal protein S19a, isoform B [Drosophila melanogaster]	17	156	1.621	0.093612	0.696884	1.02867
NP_647946.1	CG10672	uncharacterized protein Dmel_CG10672 [Drosophila melanogaster]	17	317	0.682	0.167459	-0.552156	0.776093
NP_001163065.1	l(2)01289	lethal (2) 01289, isoform F [Drosophila melanogaster]	16	1786	1.493	0.385479	0.578214	0.413999
NP_523396.1	scu	scully, isoform A [Drosophila melanogaster]	16	255	0.669	0.0307322	-0.579922	1.51241
NP_477147.2	yin	yin, isoform A [Drosophila melanogaster]	16	743	0.317	0.0290931	-1.65745	1.53621
NP_611002.3	Cyp6a20	Cyp6a20 [Drosophila melanogaster]	16	501	1.93	0.00207523	0.948601	2.68293
NP_001027270.1	Adh	alcohol dehydrogenase, isoform E [Drosophila melanogaster]	16	256	0.711	0.671143	-0.492079	0.173185
NP_001260612.1	COX4	cytochrome c oxidase subunit 4, isoform C [Drosophila melanogaster]	16	182	0.456	0.0376043	-1.13289	1.42476
NP_524841.1	GlnRS	Glutaminyl-tRNA synthetase [Drosophila melanogaster]	16	778	1.375	0.256188	0.459432	0.591441
NP_511096.2	Ost48	oligosaccharyltransferase 48kD subunit [Drosophila melanogaster]	16	449	1.192	0.0711866	0.253384	1.1476
NP_610806.2	ZnT49B	zinc transporter 49B, isoform A [Drosophila melanogaster]	16	655	0.889	0.856427	-0.169745	0.0673097
NP_728963.1	CG14997	uncharacterized protein Dmel_CG14997, isoform B [Drosophila melanogaster]	16	457	1.029	0.980223	0.041243	0.00867493
NP_608822.1	bdl	borderless [Drosophila melanogaster]	16	719	0.632	0.0111903	-0.662004	1.95116
NP_728548.1	CG13887	uncharacterized protein Dmel_CG13887, isoform C [Drosophila melanogaster]	16	228	0.932	0.996854	-0.101598	0.00136836
NP_001262220.1	SPoCk	secretory pathway calcium atpase, isoform G [Drosophila melanogaster]	16	1062	1.34	0.114539	0.422233	0.941046
NP_572484.1	Cp7Fb	chorion protein b at 7F, isoform A [Drosophila melanogaster]	16	500	0.145	0.00293041	-2.78588	2.53307
NP_610886.2	Roe1	Roe1 [Drosophila melanogaster]	16	213	0.888	0.917724	-0.171368	0.0372878
NP_727119.1	RpL17	ribosomal protein L17, isoform B [Drosophila melanogaster]	16	186	1.133	0.863063	0.180148	0.0639573
NP_001188522.1	DAAM	dishevelled associated activator of morphogenesis, isoform D [Drosophila melanogaster]	16	1463	1.549	0.0942531	0.631337	1.0257
NP_610945.1	CG8531	CG8531 [Drosophila melanogaster]	16	545	1.103	0.98357	0.141433	0.00719474
NP_650064.1	CG5214	CG5214 [Drosophila melanogaster]	16	468	1.3	0.586756	0.378512	0.231542
NP_001259998.1	CG17593	uncharacterized protein Dmel_CG17593, isoform B [Drosophila melanogaster]	16	476	1.312	0.631454	0.391768	0.199658
NP_523720.2	Gbeta76C	G protein beta-subunit 76C [Drosophila melanogaster]	16	346	1.225	0.626708	0.292782	0.202935
NP_725843.1	tn	thin, isoform B [Drosophila melanogaster]	16	1353	8.17	1.23086e-05	3.03034	4.90979
NP_648111.1	Sec63	secretory 63 [Drosophila melanogaster]	16	753	1.052	0.922455	0.0731347	0.0350549
NP_524387.1	Prx3	peroxiredoxin 3 [Drosophila melanogaster]	16	234	0.691	0.358263	-0.533242	0.445798
NP_731654.2	CG12213	uncharacterized protein Dmel_CG12213, isoform E [Drosophila melanogaster]	16	525	1.321	0.216053	0.40163	0.66544
NP_524000.1	Hsp27	heat shock protein 27, isoform A [Drosophila melanogaster]	16	213	3.07	0.00773759	1.61824	2.11139
NP_612087.1	Sac1	Sac1 phosphatase, isoform A [Drosophila melanogaster]	16	592	1.023	0.999923	0.0328061	3.3425e-05
NP_648167.1	CG8209	CG8209 [Drosophila melanogaster]	16	331	1.747	0.015205	0.80488	1.81801
NP_648408.1	CG11811	uncharacterized protein Dmel_CG11811 [Drosophila melanogaster]	16	233	1.019	0.998852	0.0271541	0.000498719
NP_524004.2	RpS9	ribosomal protein S9, isoform A [Drosophila melanogaster]	16	195	1.122	0.99651	0.166073	0.00151848
NP_609429.1	CG17097	uncharacterized protein Dmel_CG17097 [Drosophila melanogaster]	16	1087	3.994	0.000690887	1.99783	3.16059
NP_730611.1	AcCoAS	acetyl coenzyme A synthase, isoform A [Drosophila melanogaster]	16	670	1.382	0.0467203	0.466758	1.33049
NP_727445.1	Tango5	transport and golgi organization 5, isoform C [Drosophila melanogaster]	16	530	1.111	0.964245	0.151859	0.0158127
NP_573114.2	CG9914	CG9914, isoform A [Drosophila melanogaster]	16	315	1.556	0.00761644	0.637842	2.11825
NP_524364.2	FK506-bp1	FK506-binding protein 1 [Drosophila melanogaster]	16	357	0.635	0.136788	-0.655172	0.863953
NP_001260303.1	RpS2	ribosomal protein S2, isoform B [Drosophila melanogaster]	16	267	1.208	0.755042	0.27262	0.122029
NP_001285798.1	Prosalpha6	proteasome alpha6 subunit, isoform B [Drosophila melanogaster]	16	279	1.096	0.692923	0.132248	0.159315
NP_611006.1	ADPS	alkyldihydroxyacetonephosphate synthase, isoform A [Drosophila melanogaster]	16	631	0.983	0.999525	-0.0247367	0.000206528
NP_001246814.1	Cad74A	cadherin 74A, isoform C [Drosophila melanogaster]	16	1820	0.693	0.0467922	-0.529073	1.32983
NP_525073.1	mRpL30	mitochondrial ribosomal protein L30 [Drosophila melanogaster]	16	180	1.193	0.808629	0.254594	0.0922506
NP_609378.1	CG4972	CG4972 [Drosophila melanogaster]	16	561	1.034	0.996921	0.0482362	0.00133928
NP_726504.2	emp	epithelial membrane protein, isoform B [Drosophila melanogaster]	16	551	1.2	0.805275	0.263034	0.0940557
NP_611143.1	CG5065	CG5065, isoform A [Drosophila melanogaster]	16	625	1.978	0.0103967	0.984042	1.9831
NP_001286964.1	Dscam2	down syndrome cell adhesion molecule 2, isoform Q [Drosophila melanogaster]	16	1968	2.119	0.0369952	1.08338	1.43186
NP_652626.1	Ugt86Da	Ugt86Da [Drosophila melanogaster]	16	528	0.977	0.999801	-0.0335695	8.63997e-05
NP_525081.1	Hexo2	hexosaminidase 2 [Drosophila melanogaster]	16	622	1.074	0.907103	0.102994	0.0423436
NP_476609.1	AspRS	Aspartyl-tRNA synthetase, isoform A [Drosophila melanogaster]	16	531	1.537	0.00748815	0.620117	2.12563
NP_573160.1	goe	gone early, isoform A [Drosophila melanogaster]	16	879	0.742	0.554034	-0.430509	0.256464
NP_647836.2	Sc2	Sc2 [Drosophila melanogaster]	16	302	0.921	0.469857	-0.118727	0.328034
NP_609845.1	CG5131	CG5131 [Drosophila melanogaster]	16	283	1.894	0.105151	0.921436	0.978188
NP_733371.1	PH4alphaEFB	prolyl-4-hydroxylase-alpha EFB [Drosophila melanogaster]	16	550	2.013	0.105486	1.00935	0.976803
NP_611836.2	CG5549	CG5549 [Drosophila melanogaster]	16	1188	2.143	0.0508625	1.09963	1.2936
NP_001189227.1	Rbp	RIM-binding protein, isoform F [Drosophila melanogaster]	16	1844	1.708	0.056191	0.772308	1.25033
NP_732456.1	CG4572	CG4572, isoform A [Drosophila melanogaster]	16	482	0.696	0.269579	-0.522841	0.569314
NP_001259191.1	PI4KIIIalpha	phosphatidylinositol 4-kinase III alpha, isoform D [Drosophila melanogaster]	16	2154	1.183	0.277006	0.24245	0.557511
NP_609533.1	CG12264	uncharacterized protein Dmel_CG12264 [Drosophila melanogaster]	16	462	0.956	0.933454	-0.0649175	0.0299072
NP_649018.2	TrpRS-m	Tryptophanyl-tRNA synthetase, mitochondrial, isoform A [Drosophila melanogaster]	16	665	1.242	0.179036	0.312665	0.747059
NP_524049.1	Klc	kinesin light chain, isoform A [Drosophila melanogaster]	16	508	2.255	0.000353255	1.17313	3.45191
NP_610914.2	CG16935	uncharacterized protein Dmel_CG16935, isoform A [Drosophila melanogaster]	16	357	0.652	0.234262	-0.617056	0.630298
NP_610693.1	Tret1-1	trehalose transporter 1-1, isoform A [Drosophila melanogaster]	15	857	2.032	0.0579122	1.0229	1.23723
NP_523684.2	Galphao	G protein alpha o subunit, isoform A [Drosophila melanogaster]	15	354	1.103	0.985927	0.141433	0.00615506
NP_611218.1	NT5E-2	Ecto-5'-nucleotidase 2, isoform A [Drosophila melanogaster]	15	585	0.947	0.991711	-0.0785637	0.00361472
NP_609241.1	CG13091	uncharacterized protein Dmel_CG13091, isoform A [Drosophila melanogaster]	15	523	4.659	0.000526459	2.22002	3.27864
NP_001284845.1	CG2930	CG2930, isoform E [Drosophila melanogaster]	15	815	0.589	0.0113121	-0.76366	1.94646
NP_001259545.1	mud	mushroom body defect, isoform L [Drosophila melanogaster]	15	2501	3.3	0.0211637	1.72247	1.67441
NP_995616.1	colt	congested-like trachea, isoform D [Drosophila melanogaster]	15	306	0.649	0.0154704	-0.62371	1.8105
NP_610254.1	CG30159	uncharacterized protein Dmel_CG30159, isoform A [Drosophila melanogaster]	15	239	0.667	0.350008	-0.584241	0.455922
NP_001247362.1	RpS8	ribosomal protein S8, isoform E [Drosophila melanogaster]	15	208	1.644	0.173805	0.71721	0.759939
NP_001014522.2	Mp20	muscle protein 20, isoform C [Drosophila melanogaster]	15	189	1.777	0.0454267	0.829444	1.34269
NP_001260299.1	und	uninitiated, isoform B [Drosophila melanogaster]	15	448	1.361	0.380641	0.444667	0.419484
NP_524075.2	mRpL39	mitochondrial ribosomal protein L39 [Drosophila melanogaster]	15	333	1.106	0.866398	0.145351	0.0622826
NP_651072.1	mRpL45	mitochondrial ribosomal protein L45 [Drosophila melanogaster]	15	361	1.122	0.66906	0.166073	0.174535
NP_650717.1	CG7675	CG7675, isoform B [Drosophila melanogaster]	15	336	1.208	0.762406	0.27262	0.117814
NP_001285889.1	ND-B22	NADH dehydrogenase (ubiquinone) B22 subunit, isoform B [Drosophila melanogaster]	15	144	0.381	0.144408	-1.39214	0.840408
NP_723549.1	Mulk	Multi-substrate lipid kinase [Drosophila melanogaster]	15	408	0.966	0.948928	-0.0499049	0.0227667
NP_651002.3	CG6028	CG6028 [Drosophila melanogaster]	15	293	0.827	0.0102052	-0.274041	1.99118
NP_649970.1	CG11722	uncharacterized protein Dmel_CG11722 [Drosophila melanogaster]	15	203	0.981	0.999189	-0.027675	0.000352412
NP_524404.1	vib	vibrator, isoform A [Drosophila melanogaster]	15	272	0.762	0.722696	-0.392137	0.141044
NP_001245414.1	CG1674	CG1674, isoform L [Drosophila melanogaster]	15	905	3.243	0.00259932	1.69733	2.58514
NP_001285102.1	CG2145	CG2145, isoform B [Drosophila melanogaster]	15	592	3.691	0.000462267	1.88401	3.33511
NP_001286818.1	CG3209	CG3209, isoform D [Drosophila melanogaster]	15	537	0.96	0.968926	-0.0588937	0.0137095
NP_001036692.1	ps	pasilla, isoform F [Drosophila melanogaster]	15	572	2.215	0.000848775	1.14731	3.07121
NP_611686.2	Vps20	vacuolar protein sorting 20, isoform C [Drosophila melanogaster]	15	212	1.365	0.242951	0.448901	0.614481
NP_524836.2		coat protein (coatomer) beta' [Drosophila melanogaster]	15	914	1.818	0.00641735	0.862352	2.19264
NP_610087.2	CG9257	CG9257 [Drosophila melanogaster]	15	347	2.309	0.00033204	1.20727	3.47881
NP_523719.1	Iswi	imitation SWI, isoform A [Drosophila melanogaster]	15	1027	0.745	0.296386	-0.424688	0.528142
NP_609979.2	CG10132	uncharacterized protein Dmel_CG10132, isoform A [Drosophila melanogaster]	15	1361	1.633	0.0961919	0.707525	1.01686
NP_728930.1	Gad1	glutamic acid decarboxylase 1, isoform B [Drosophila melanogaster]	15	510	1.076	0.988818	0.105678	0.00488346
NP_476863.1	inaC	inactivation no afterpotential C [Drosophila melanogaster]	15	700	2.223	0.00112004	1.15251	2.95077
NP_524907.2	rin	rasputin, isoform B [Drosophila melanogaster]	15	690	1.846	0.135643	0.884403	0.867602
NP_649086.2	CG6812	CG6812 [Drosophila melanogaster]	15	327	2.172	0.00433537	1.11902	2.36297
NP_610947.3	CG8547	CG8547, isoform C [Drosophila melanogaster]	15	618	4.612	0.000123261	2.20539	3.90918
NP_573057.1	CG9281	CG9281, isoform B [Drosophila melanogaster]	15	611	1.389	0.22441	0.474047	0.648958
NP_647840.1	CG10863	uncharacterized protein Dmel_CG10863 [Drosophila melanogaster]	15	316	0.837	0.688077	-0.2567	0.162363
NP_648512.2	CG5946	CG5946, isoform B [Drosophila melanogaster]	15	316	0.806	0.704702	-0.311148	0.151994
NP_996346.2	Vap33	VAMP-associated protein 33kDa, isoform E [Drosophila melanogaster]	15	269	1.482	0.0126058	0.567545	1.89943
NP_569875.2	CG3699	CG3699 [Drosophila melanogaster]	15	251	2.19	0.00179015	1.13093	2.74711
NP_477405.1	Inos	inos [Drosophila melanogaster]	15	565	0.694	0.00763966	-0.526992	2.11693
NP_524426.2	Cortactin	cortactin, isoform A [Drosophila melanogaster]	15	559	2.267	0.170981	1.18078	0.767053
NP_649139.1	Oat	ornithine aminotransferase precursor [Drosophila melanogaster]	15	431	0.633	0.0607822	-0.659723	1.21622
NP_001036316.1	stnA	stoned A, isoform C [Drosophila melanogaster]	15	850	1.853	0.164132	0.889863	0.784808
NP_610635.4	Cyp12d1-p	Cyp12d1-p, isoform A [Drosophila melanogaster]	15	521	0.251	0.00380162	-1.99424	2.42003
NP_523707.1	Cct5	T-complex chaperonin 5, isoform A [Drosophila melanogaster]	15	542	1.439	0.52646	0.525067	0.278634
NP_001286014.1	dl	dorsal, isoform F [Drosophila melanogaster]	15	999	3.26	0.00310498	1.70487	2.50794
NP_001259397.1	ATPsyndelta	ATP synthase, delta subunit, isoform B [Drosophila melanogaster]	15	157	0.54	0.0233494	-0.888969	1.63172
NP_650447.1	Sra-1	specifically Rac1-associated protein 1 [Drosophila melanogaster]	15	1291	1.533	0.037318	0.616358	1.42808
NP_573003.2	Cyp4s3	Cyp4s3 [Drosophila melanogaster]	15	495	2.296	0.0306414	1.19912	1.51369
NP_477194.1	ATPsynCF6	ATP synthase, coupling factor 6, isoform A [Drosophila melanogaster]	15	106	0.383	0.301567	-1.38458	0.520616
NP_731967.2	GlyS	glycogen synthase, isoform A [Drosophila melanogaster]	15	709	1.697	0.237497	0.762987	0.624342
NP_524185.1	mRpL15	mitochondrial ribosomal protein L15 [Drosophila melanogaster]	15	286	1.211	0.777035	0.276199	0.109559
NP_569901.1	fs(1)N	female sterile (1) nasrat [Drosophila melanogaster]	15	2118	0.329	0.00386182	-1.60384	2.41321
NP_610401.1	CG8635	CG8635, isoform A [Drosophila melanogaster]	15	404	2.074	0.215032	1.05242	0.667497
NP_001286057.1	Faf2	Fas-associated factor, isoform B [Drosophila melanogaster]	15	464	1.637	0.069799	0.711054	1.15615
NP_001285784.1	FKBP59	FK506-binding protein FKBP59, isoform B [Drosophila melanogaster]	15	439	1.212	0.28743	0.27739	0.541468
NP_477014.1	La	La autoantigen-like [Drosophila melanogaster]	15	390	0.675	0.165283	-0.567041	0.781771
NP_611410.1	EndoB	endophilin B, isoform A [Drosophila melanogaster]	15	390	1.288	0.181516	0.365133	0.741085
NP_001036706.2	CG42327	uncharacterized protein Dmel_CG42327 [Drosophila melanogaster]	15	1429	1.542	0.26873	0.624803	0.570683
NP_001259982.1	SerRS	Seryl-tRNA synthetase, isoform B [Drosophila melanogaster]	15	501	1.102	0.78263	0.140124	0.106444
NP_523646.1	Cyp9b2	cytochrome P450-9b2 [Drosophila melanogaster]	15	505	0.48	0.0557781	-1.05889	1.25354
NP_001259264.1	CG4020	CG4020, isoform B [Drosophila melanogaster]	15	494	0.36	0.0113091	-1.47393	1.94657
NP_511166.2	mRpL3	mitochondrial ribosomal protein L3 [Drosophila melanogaster]	15	362	1.038	0.9916	0.0538064	0.00366349
NP_610910.1	CG6543	CG6543, isoform A [Drosophila melanogaster]	15	295	0.382	0.0138705	-1.38836	1.85791
NP_648289.2	Use1	unconventional SNARE in the ER 1 [Drosophila melanogaster]	15	250	1.682	0.135478	0.750178	0.868132
NP_001163196.1	CG30122	uncharacterized protein Dmel_CG30122, isoform C [Drosophila melanogaster]	15	1272	1.292	0.381631	0.369606	0.418357
NP_524100.1	mRpS31	mitochondrial ribosomal protein S31 [Drosophila melanogaster]	15	376	0.805	0.901186	-0.312939	0.0451854
NP_001287107.1	Capr	caprin, isoform B [Drosophila melanogaster]	15	961	1.022	0.999177	0.0313952	0.000357597
NP_651849.1	CG1544	CG1544 [Drosophila melanogaster]	15	919	0.825	0.476767	-0.277534	0.321694
NP_610746.1	CG8858	CG8858 [Drosophila melanogaster]	15	1890	1.511	0.327458	0.595504	0.484844
NP_610174.1	CG11665	uncharacterized protein Dmel_CG11665, isoform A [Drosophila melanogaster]	15	658	1.476	0.0673118	0.561693	1.17191
NP_001285895.1	RpL24	ribosomal protein L24, isoform B [Drosophila melanogaster]	15	155	1.067	0.995669	0.0935602	0.00188495
NP_650523.1	CG5903	CG5903, isoform A [Drosophila melanogaster]	15	226	0.799	0.653067	-0.323733	0.185042
NP_728665.1	Gk2	glycerol kinase 2, isoform C [Drosophila melanogaster]	15	576	0.524	0.330591	-0.932361	0.480708
NP_001262163.1	Glg1	golgi complex-localized glycoprotein 1, isoform B [Drosophila melanogaster]	15	1107	0.773	0.217152	-0.37146	0.663235
NP_649158.1	Rpn1	regulatory particle non-ATPase 1 [Drosophila melanogaster]	15	919	1.808	0.0605272	0.854395	1.21805
NP_723927.2	ND-B17	NADH dehydrogenase (ubiquinone) B17 subunit, isoform C [Drosophila melanogaster]	15	167	0.823	0.866646	-0.281036	0.0621581
NP_728869.1	PHGPx	PHGPx, isoform D [Drosophila melanogaster]	15	238	1.426	0.0930746	0.511974	1.03117
NP_001286894.1	CG13907	uncharacterized protein Dmel_CG13907, isoform B [Drosophila melanogaster]	15	816	2.443	0.0268304	1.28865	1.57137
NP_523527.1	Cyp4e3	cytochrome P450-4e3 [Drosophila melanogaster]	14	526	7.59	0.00213412	2.9241	2.67078
NP_732610.1	Rab1	Rab1 [Drosophila melanogaster]	14	205	0.841	0.431615	-0.249822	0.364903
NP_476853.1	bic	bicaudal, isoform A [Drosophila melanogaster]	14	169	1.42	0.691864	0.505891	0.15998
NP_650783.2	Cyp12a4	Cyp12a4 [Drosophila melanogaster]	14	536	0.545	0.0714938	-0.875672	1.14573
NP_733278.1	CG11897	uncharacterized protein Dmel_CG11897, isoform A [Drosophila melanogaster]	14	1374	0.571	0.0320434	-0.808437	1.49426
NP_610384.1	Mal-A8	maltase A8 [Drosophila melanogaster]	14	588	2.207	0.0986052	1.14209	1.0061
NP_726016.1	CG30291	uncharacterized protein Dmel_CG30291 [Drosophila melanogaster]	14	509	1.826	0.0221712	0.868687	1.65421
NP_001259313.1	Tom40	translocase of outer membrane 40, isoform C [Drosophila melanogaster]	14	344	0.7	0.423332	-0.514573	0.373319
NP_001285984.1	Cyt-c-p	cytochrome c proximal, isoform B [Drosophila melanogaster]	14	108	0.817	0.561093	-0.291592	0.250966
NP_476849.1	Src42A	Src oncogene at 42A, isoform A [Drosophila melanogaster]	14	517	1.545	0.0117897	0.627607	1.9285
NP_573110.1	UQCR-14	Ubiquinol-cytochrome c reductase 14 kDa subunit [Drosophila melanogaster]	14	111	0.478	0.0530421	-1.06492	1.27538
NP_649070.1	RpL26	ribosomal protein L26, isoform A [Drosophila melanogaster]	14	149	0.981	0.999732	-0.027675	0.000116467
NP_995906.1	HnRNP-K	heterogeneous nuclear ribonucleoprotein K, isoform C [Drosophila melanogaster]	14	502	1.241	0.107007	0.311503	0.970589
NP_476735.1	Sod1	superoxide dismutase 1, isoform A [Drosophila melanogaster]	14	153	0.806	0.776682	-0.311148	0.109757
NP_995862.1	Psi	P-element somatic inhibitor, isoform C [Drosophila melanogaster]	14	797	1.668	0.125899	0.738119	0.899979
NP_001285108.1	Rpt3	regulatory particle triple-A ATPase 3, isoform B [Drosophila melanogaster]	14	413	1.946	0.00282513	0.960512	2.54896
NP_523533.2	me31B	maternal expression at 31B, isoform A [Drosophila melanogaster]	14	459	0.728	0.678948	-0.45799	0.168164
NP_648062.2	CG10077	uncharacterized protein Dmel_CG10077, isoform A [Drosophila melanogaster]	14	818	1.285	0.340496	0.361768	0.467888
NP_001285130.1	CG1703	CG1703, isoform B [Drosophila melanogaster]	14	901	1.214	0.538146	0.279768	0.2691
NP_788363.1	Dg	dystroglycan, isoform D [Drosophila melanogaster]	14	1262	1.341	0.0335624	0.423309	1.47415
NP_001246866.1	rgn	regeneration, isoform B [Drosophila melanogaster]	14	808	1.728	0.0256478	0.789103	1.59095
NP_523439.2	l(2)gl	lethal (2) giant larvae, isoform C [Drosophila melanogaster]	14	1161	1.163	0.72425	0.217851	0.140111
NP_001246234.1	Pfk	phosphofructokinase, isoform D [Drosophila melanogaster]	14	950	1.264	0.794364	0.337996	0.0999804
NP_726472.1	Pof	painting of fourth, isoform A [Drosophila melanogaster]	14	495	4.369	0.000967673	2.1273	3.01427
NP_608819.1	CG3702	CG3702, isoform A [Drosophila melanogaster]	14	641	1.142	0.581176	0.191563	0.235693
NP_648415.1	CG6409	CG6409, isoform A [Drosophila melanogaster]	14	360	1.42	0.839429	0.505891	0.0760162
NP_001285159.1	Sec16	secretory 16, isoform J [Drosophila melanogaster]	14	2242	2.505	0.014739	1.32481	1.83153
NP_610333.1	CG8728	CG8728 [Drosophila melanogaster]	14	556	0.632	0.0310971	-0.662004	1.50728
NP_572861.1	CG4332	CG4332 [Drosophila melanogaster]	14	562	0.594	0.00518088	-0.751465	2.2856
NP_524312.1	Adk3	adenylate kinase 3, isoform A [Drosophila melanogaster]	14	216	0.935	0.958423	-0.0969617	0.0184427
NP_724277.2	CG31678	uncharacterized protein Dmel_CG31678, isoform B [Drosophila melanogaster]	14	1417	1.573	0.151723	0.653519	0.81895
NP_001284805.1	ND-B14.5A	NADH dehydrogenase (ubiquinone) B14.5 A subunit, isoform B [Drosophila melanogaster]	14	103	0.421	0.0147464	-1.24811	1.83131
NP_569839.2	CG3777	CG3777, isoform B [Drosophila melanogaster]	14	879	5.155	0.000252903	2.36597	3.59705
NP_652606.1	c11.1	c11.1, isoform A [Drosophila melanogaster]	14	1742	1.286	0.865012	0.362891	0.0629776
NP_001286784.1	CG5554	CG5554, isoform B [Drosophila melanogaster]	14	330	1.488	0.443494	0.573375	0.353113
NP_731649.2	Cad87A	cadherin 87A [Drosophila melanogaster]	14	1975	1.361	0.13695	0.444667	0.863437
NP_726886.1	HIP-R	Hsc/Hsp70-interacting protein related, isoform B [Drosophila melanogaster]	14	377	2.734	0.0165191	1.45101	1.78201
NP_524586.1	Mlc2	myosin light chain 2 [Drosophila melanogaster]	14	222	2.351	0.0434333	1.23327	1.36218
NP_001260063.1	mRpL28	mitochondrial ribosomal protein L28, isoform B [Drosophila melanogaster]	14	302	1.219	0.464428	0.285698	0.333082
NP_649560.1	RpL13A	ribosomal protein L13A, isoform B [Drosophila melanogaster]	14	205	0.844	0.452158	-0.244685	0.34471
NP_725686.1	CG4847	CG4847, isoform D [Drosophila melanogaster]	14	420	0.765	0.296353	-0.386468	0.528191
NP_001285329.1	eIF-2alpha	eukaryotic translation initiation factor 2alpha, isoform B [Drosophila melanogaster]	14	341	1.029	0.99981	0.041243	8.27293e-05
NP_511161.2	Top1	topoisomerase 1, isoform A [Drosophila melanogaster]	14	974	0.893	0.952923	-0.163268	0.0209423
NP_525120.1	Nop60B	nucleolar protein at 60B, isoform A [Drosophila melanogaster]	14	508	0.717	0.534942	-0.479955	0.271693
NP_610852.1	CG4670	CG4670, isoform A [Drosophila melanogaster]	14	637	0.97	0.998632	-0.0439433	0.000594317
NP_001036747.1	CG4467	CG4467, isoform B [Drosophila melanogaster]	14	1125	1.197	0.68362	0.259423	0.165185
NP_524053.2	RpS4	ribosomal protein S4, isoform B [Drosophila melanogaster]	14	261	1.337	0.325183	0.418999	0.487873
NP_001097744.1	Ugt86Dd	Ugt86Dd [Drosophila melanogaster]	14	517	0.166	0.000778141	-2.59074	3.10894
NP_001036722.1	Dys	dystrophin, isoform H [Drosophila melanogaster]	14	3598	1.151	0.935458	0.202888	0.0289755
NP_611954.2	ND-19	NADH dehydrogenase (ubiquinone) 19 kDa subunit, isoform A [Drosophila melanogaster]	14	175	0.487	0.0573482	-1.03801	1.24148
NP_001014513.1	stmA	stambha A, isoform C [Drosophila melanogaster]	14	834	1.394	0.13118	0.479231	0.882131
NP_001260333.1	Cand1	Cullin-associated and neddylation-dissociated 1, isoform B [Drosophila melanogaster]	14	1248	1.846	0.0161477	0.884403	1.79189
NP_001262211.1	Ten-m	tenascin major, isoform E [Drosophila melanogaster]	14	3349	2.224	0.0016382	1.15316	2.78563
NP_651237.1	beta-PheRS	Phenylalanyl-tRNA synthetase, beta-subunit [Drosophila melanogaster]	14	589	1.635	0.0488016	0.709291	1.31157
NP_650679.3	Prx5	peroxiredoxin 5, isoform A [Drosophila melanogaster]	14	190	0.947	0.977739	-0.0785637	0.00977722
NP_649679.1	Ccp84Ae	Ccp84Ae [Drosophila melanogaster]	14	208	1.474	0.39111	0.559737	0.407701
NP_728599.1	CG2199	CG2199, isoform B [Drosophila melanogaster]	14	733	1.007	1	0.0100637	1.3238e-07
NP_728162.1	CG32549	uncharacterized protein Dmel_CG32549, isoform E [Drosophila melanogaster]	14	630	0.979	0.999778	-0.0306192	9.65379e-05
NP_572433.1	CG2233	CG2233 [Drosophila melanogaster]	14	414	0.222	0.000656213	-2.17137	3.18296
NP_651250.2	Golgin84	Golgin-84 [Drosophila melanogaster]	14	516	2.509	0.0333614	1.32711	1.47676
NP_728294.1	COX6B	cytochrome c oxidase subunit 6B, isoform A [Drosophila melanogaster]	14	96	0.565	0.278968	-0.823677	0.554445
NP_001245427.1	unc-13	unc-13, isoform E [Drosophila melanogaster]	14	3186	2.299	0.0369316	1.20101	1.4326
NP_476773.1	tud	tudor, isoform A [Drosophila melanogaster]	14	2515	1.576	0.2886	0.656268	0.539703
NP_651674.3	CG14516	uncharacterized protein Dmel_CG14516, isoform B [Drosophila melanogaster]	14	999	0.629	0.00149674	-0.668868	2.82485
NP_724823.2	trpl	transient receptor potential-like, isoform D [Drosophila melanogaster]	14	1124	4.094	4.45139e-05	2.03351	4.3515
NP_001285018.1	CG1440	CG1440, isoform D [Drosophila melanogaster]	14	551	0.84	0.103516	-0.251539	0.98499
NP_611155.3	unc-104	uncoordinated-104, isoform D [Drosophila melanogaster]	14	1739	2.048	0.02005	1.03422	1.69789
NP_649004.1	CG7460	CG7460, isoform B [Drosophila melanogaster]	14	486	1.433	0.216958	0.519039	0.663624
NP_651987.1	Vha36-1	vacuolar H[+] ATPase 36kD subunit 1 [Drosophila melanogaster]	14	246	0.282	0.339443	-1.82623	0.469234
NP_524485.1	Syx18	syntaxin 18 [Drosophila melanogaster]	14	395	1.729	0.00723656	0.789938	2.14047
NP_725288.1	IMPPP	immune induced molecule prepropeptide, isoform A [Drosophila melanogaster]	14	257	1.097	0.993058	0.133564	0.00302549
NP_001260375.1	Ca-beta	Ca2+-channel-protein-beta-subunit, isoform L [Drosophila melanogaster]	14	844	2.558	0.059081	1.35502	1.22855
NP_726794.1	D2hgdh	D-2-hydroxyglutaric acid dehydrogenase, isoform B [Drosophila melanogaster]	14	533	0.859	0.940906	-0.21927	0.0264538
NP_652063.1	l(2)k14710	lethal (2) k14710, isoform A [Drosophila melanogaster]	14	861	1.147	0.921763	0.197865	0.0353808
NP_001246694.1	Hsp23	heat shock protein 23, isoform B [Drosophila melanogaster]	14	186	3.693	0.00144059	1.88479	2.84146
NP_788500.1	Est-6	esterase 6, isoform A [Drosophila melanogaster]	14	544	0.428	0.00667481	-1.22432	2.17556
NP_523774.1	RpL18A	ribosomal protein L18A [Drosophila melanogaster]	14	177	0.893	0.86511	-0.163268	0.0629286
NP_524826.1	TrpRS	Tryptophanyl-tRNA synthetase [Drosophila melanogaster]	14	430	1.439	0.365447	0.525067	0.437176
NP_725995.1	exu	exuperantia, isoform A [Drosophila melanogaster]	14	532	1.818	0.0697387	0.862352	1.15653
NP_477060.1	igl	igloo, isoform A [Drosophila melanogaster]	14	240	2.397	0.140214	1.26123	0.853209
NP_476644.1	Acp26Aa	accessory gland protein 26Aa [Drosophila melanogaster]	14	264	5.768	0.00215995	2.52807	2.66556
NP_651187.2	Nup98-96	nucleoporin 98-96kD, isoform A [Drosophila melanogaster]	14	1960	1.875	0.342143	0.906891	0.465792
NP_651582.1	ALiX	ALG-2 interacting protein X [Drosophila melanogaster]	14	836	1.38	0.0421208	0.464668	1.3755
NP_524647.2	sif	still life, isoform A [Drosophila melanogaster]	13	2052	2.37	0.11357	1.24489	0.944736
NP_001262811.1	CASK	CASK, isoform H [Drosophila melanogaster]	13	929	1.235	0.616573	0.304511	0.210015
NP_651668.1	CG11876	uncharacterized protein Dmel_CG11876, isoform D [Drosophila melanogaster]	13	365	0.655	0.0442566	-0.610433	1.35402
NP_001188678.1	Rab35	Rab35, isoform B [Drosophila melanogaster]	13	201	1.128	0.599198	0.173767	0.22243
NP_524925.1	Hsp60B	heat shock protein 60B [Drosophila melanogaster]	13	648	7.294	0.00495303	2.86671	2.30513
NP_523749.2	Cyp6a8	cytochrome P450-6a8 [Drosophila melanogaster]	13	506	3.01	0.00241497	1.58976	2.61709
NP_724013.1	Ugt36Bc	Ugt36Bc, isoform B [Drosophila melanogaster]	13	543	1.008	0.999941	0.0114956	2.57996e-05
NP_001245598.1	Cht6	chitinase 6, isoform C [Drosophila melanogaster]	13	4611	2.389	0.00245297	1.25641	2.61031
NP_726106.1	HmgZ	HMG protein Z, isoform A [Drosophila melanogaster]	13	111	1.489	0.766059	0.574344	0.115738
NP_573357.1	Mec2	Mec2 [Drosophila melanogaster]	13	350	0.9	0.887177	-0.152003	0.0519899
NP_523571.1	ck	crinkled, isoform B [Drosophila melanogaster]	13	2167	1.691	0.0260257	0.757877	1.5846
NP_001246734.1	CG10616	uncharacterized protein Dmel_CG10616, isoform B [Drosophila melanogaster]	13	508	1.341	0.0810404	0.423309	1.0913
NP_001027401.1	CG18003	uncharacterized protein Dmel_CG18003 [Drosophila melanogaster]	13	366	2.063	0.14458	1.04474	0.839891
NP_650596.1	GckIII	germinal centre kinase III [Drosophila melanogaster]	13	642	1.303	0.0905077	0.381837	1.04331
NP_001246578.1	Spn	spinophilin, isoform J [Drosophila melanogaster]	13	2148	2.034	0.067766	1.02432	1.16899
NP_610462.3	shrb	shrub [Drosophila melanogaster]	13	226	2.333	0.0985288	1.22219	1.00644
NP_648242.1	CG5989	CG5989, isoform A [Drosophila melanogaster]	13	436	1.187	0.403145	0.24732	0.394538
NP_001137770.1	ND-B17.2	NADH dehydrogenase (ubiquinone) B17.2 subunit, isoform B [Drosophila melanogaster]	13	142	0.571	0.373707	-0.808437	0.427469
NP_651972.1	ND-PDSW	NADH dehydrogenase (ubiquinone) PDSW subunit, isoform A [Drosophila melanogaster]	13	159	0.452	0.0487574	-1.14561	1.31196
NP_611205.1	CG30101	uncharacterized protein Dmel_CG30101 [Drosophila melanogaster]	13	328	1.698	0.242549	0.763836	0.615201
NP_001163531.1	Dmtn	dementin, isoform H [Drosophila melanogaster]	13	679	1.597	0.0823135	0.675364	1.08453
NP_524116.2	Su(P)	suppressor of ref(2)P sterility [Drosophila melanogaster]	13	417	0.484	0.143979	-1.04692	0.841702
NP_001259175.1	Pgd	phosphogluconate dehydrogenase, isoform B [Drosophila melanogaster]	13	481	1.056	0.981963	0.0786098	0.00790471
NP_728273.1	RpS10b	ribosomal protein S10b, isoform B [Drosophila melanogaster]	13	160	2.866	0.0189261	1.51904	1.72294
NP_651208.1	CG5991	CG5991, isoform A [Drosophila melanogaster]	13	447	0.533	0.138071	-0.907793	0.859899
NP_523415.1	AP-1-2beta	adaptor protein complex 1/2, beta subunit [Drosophila melanogaster]	13	921	1.539	0.29127	0.621993	0.535704
NP_523493.3	cup	cup, isoform B [Drosophila melanogaster]	13	1117	1.732	0.445325	0.792439	0.351323
NP_477034.1	tsr	twinstar [Drosophila melanogaster]	13	148	0.859	0.895222	-0.21927	0.0480695
NP_730192.2	Lasp	lasp, isoform B [Drosophila melanogaster]	13	657	2.158	0.0596565	1.10969	1.22434
NP_733405.2	cindr	CIN85 and CD2AP related, isoform C [Drosophila melanogaster]	13	882	2.155	0.0144631	1.10769	1.83974
NP_648514.1	RpL10Ab	ribosomal protein L10Ab, isoform A [Drosophila melanogaster]	13	217	0.862	0.57821	-0.21424	0.237914
NP_730568.1	tzn	tenzing norgay, isoform C [Drosophila melanogaster]	13	348	0.489	0.00498026	-1.03209	2.30275
NP_726074.2	Fkbp14	FK506-binding protein 14, isoform C [Drosophila melanogaster]	13	216	1.905	0.40154	0.929791	0.396271
NP_524494.1	OstStt3	oligosaccharyl transferase 3 [Drosophila melanogaster]	13	774	0.904	0.897069	-0.145605	0.0471743
NP_001260258.1	Acer	Angiotensin-converting enzyme-related, isoform B [Drosophila melanogaster]	13	630	1.127	0.99282	0.172488	0.00312951
NP_995614.1	Slh	SLY-1 homologous, isoform C [Drosophila melanogaster]	13	639	1.486	0.168524	0.571434	0.773339
NP_648923.1	nudC	nudC, isoform A [Drosophila melanogaster]	13	332	2.02	0.0417207	1.01436	1.37965
NP_477098.1	Rho1	Rho1, isoform A [Drosophila melanogaster]	13	192	1.19	0.560703	0.250962	0.251267
NP_001262490.1	GC1	glutamate carrier 1, isoform B [Drosophila melanogaster]	13	321	0.744	0.811087	-0.426625	0.0909325
NP_611374.1	CG15080	uncharacterized protein Dmel_CG15080 [Drosophila melanogaster]	13	1541	2.078	0.03173	1.0552	1.49853
NP_524884.1	RpS14a	ribosomal protein S14a, isoform B [Drosophila melanogaster]	13	151	1.86	0.0052042	0.895303	2.28365
NP_731765.1	CG46280	uncharacterized protein Dmel_CG46280, isoform B [Drosophila melanogaster]	13	532	1.956	0.0225429	0.967906	1.64699
NP_573000.1	CG5599	CG5599 [Drosophila melanogaster]	13	462	0.538	0.0673121	-0.894322	1.17191
NP_001245939.1	Snx6	sorting nexin 6, isoform B [Drosophila melanogaster]	13	455	1.235	0.0313216	0.304511	1.50416
NP_524597.1	Sap-r	Saposin-related, isoform A [Drosophila melanogaster]	13	953	0.443	0.178185	-1.17462	0.749129
NP_725534.1	Got1	glutamate oxaloacetate transaminase 1, isoform B [Drosophila melanogaster]	13	437	0.766	0.705787	-0.384584	0.151326
NP_523813.1	RpL23	ribosomal protein L23 [Drosophila melanogaster]	13	140	0.948	0.758326	-0.077041	0.120144
NP_651330.1	veli	veli, isoform A [Drosophila melanogaster]	13	195	1.745	0.0687786	0.803227	1.16255
NP_476625.2	Mal-A2	maltase A2 [Drosophila melanogaster]	13	567	0.847	0.886579	-0.239566	0.0522824
NP_524345.2	Adgf-D	adenosine deaminase-related growth factor D [Drosophila melanogaster]	13	502	1.053	0.952979	0.0745054	0.0209168
NP_650954.1	CG5862	CG5862 [Drosophila melanogaster]	13	309	1.848	0.0072625	0.885965	2.13891
NP_995605.1	Plc21C	phospholipase C at 21C, isoform D [Drosophila melanogaster]	13	1318	1.346	0.110991	0.428678	0.954712
NP_609322.1	CG4598	CG4598, isoform A [Drosophila melanogaster]	13	281	0.532	0.0968359	-0.910502	1.01396
NP_651278.2	Ppox	protoporphyrinogen oxidase [Drosophila melanogaster]	13	475	0.8	0.513932	-0.321928	0.289094
NP_524742.1	mRpL12	mitochondrial ribosomal protein L12 [Drosophila melanogaster]	13	182	0.509	0.571001	-0.974262	0.243363
NP_001036341.2	homer	homer, isoform E [Drosophila melanogaster]	13	531	1.95	0.0429211	0.963474	1.36733
NP_001260364.1	Porin2	Porin2, isoform B [Drosophila melanogaster]	13	293	5.509	0.000963761	2.46179	3.01603
NP_608777.1	Snx1	sorting nexin 1, isoform A [Drosophila melanogaster]	13	458	1.036	0.998337	0.051024	0.000723036
NP_647661.1	mRpL46	mitochondrial ribosomal protein L46 [Drosophila melanogaster]	13	258	0.433	0.0752794	-1.20756	1.12332
NP_001097238.1	Drep2	DNA fragmentation factor-related protein 2, isoform B [Drosophila melanogaster]	13	549	2.221	0.0142023	1.15121	1.84764
NP_001246325.1	Rpn6	regulatory particle non-ATPase 6, isoform C [Drosophila melanogaster]	13	422	1.139	0.981293	0.187768	0.00820145
NP_001163600.1	Ace	acetylcholine esterase, isoform B [Drosophila melanogaster]	13	649	1.865	0.0339335	0.899176	1.46937
NP_001260415.1	Elf	Ef1alpha-like factor, isoform B [Drosophila melanogaster]	13	619	1.087	0.969345	0.120352	0.0135217
NP_001014491.1	ref(2)P	refractory to sigma P, isoform B [Drosophila melanogaster]	13	599	0.942	0.99847	-0.086201	0.000665043
NP_648268.1	ValRS-m	Valyl-tRNA synthetase, mitochondrial, isoform A [Drosophila melanogaster]	13	994	1.466	0.0681955	0.551885	1.16624
NP_608445.2	CG1718	CG1718, isoform B [Drosophila melanogaster]	13	1714	0.595	0.114136	-0.749038	0.942579
NP_001027048.1	ND-ASHI	NADH dehydrogenase (ubiquinone) ASHI subunit, isoform B [Drosophila melanogaster]	13	175	0.613	0.0867041	-0.706041	1.06196
NP_476925.1	Sod2	superoxide dismutase 2 (Mn), isoform A [Drosophila melanogaster]	13	217	0.084	0.000324626	-3.57347	3.48862
NP_001261484.1	CG10103	uncharacterized protein Dmel_CG10103, isoform C [Drosophila melanogaster]	13	396	1.706	0.0447705	0.770618	1.34901
NP_536738.3	rdgC	retinal degeneration C, isoform F [Drosophila melanogaster]	13	746	1.841	0.0145141	0.88049	1.83821
NP_001097742.1	CG6567	CG6567 [Drosophila melanogaster]	13	235	0.558	0.115152	-0.841663	0.938729
NP_726650.2	CG32017	uncharacterized protein Dmel_CG32017, isoform B [Drosophila melanogaster]	13	482	1.697	0.190498	0.762987	0.72011
NP_724018.1	AspRS-m	Aspartyl-tRNA synthetase, mitochondrial, isoform A [Drosophila melanogaster]	13	1082	0.932	0.962742	-0.101598	0.0164899
NP_651456.1	Dak1	Dak1 [Drosophila melanogaster]	13	253	1.105	0.891898	0.144046	0.0496847
NP_650840.1	Arc42	Arc42 [Drosophila melanogaster]	13	405	0.699	0.15034	-0.516636	0.822926
NP_599144.1	Patj	patj, isoform A [Drosophila melanogaster]	13	871	1.998	0.00683666	0.998557	2.16516
NP_001188695.1	Msp300	Muscle-specific protein 300 kDa, isoform G [Drosophila melanogaster]	12	13540	3.035	0.0106173	1.6017	1.97399
NP_523625.1	Act42A	actin 42A [Drosophila melanogaster]	12	376	0.941	0.952341	-0.0877334	0.0212075
NP_001245732.1	wupA	wings up A, isoform H [Drosophila melanogaster]	12	260	2.744	0.0550065	1.45628	1.25959
NP_523366.2	Cyp1	cyclophilin 1 [Drosophila melanogaster]	12	227	0.741	0.0593442	-0.432455	1.22662
NP_523949.2	Prat2	phosphoribosylamidotransferase 2, isoform B [Drosophila melanogaster]	12	547	1.488	0.00817295	0.573375	2.08762
NP_610743.2	Cyp6g1	Cyp6g1, isoform A [Drosophila melanogaster]	12	524	1.577	0.146779	0.657183	0.833337
NP_001036641.1	Snap25	Synaptosomal-associated protein 25kDa, isoform A [Drosophila melanogaster]	12	212	1.265	0.173404	0.339137	0.760941
NP_523784.2	Pepck	phosphoenolpyruvate carboxykinase [Drosophila melanogaster]	12	647	3.233	0.00188164	1.69287	2.72546
NP_729613.1	S-Lap4	Sperm-Leucylaminopeptidase 4 [Drosophila melanogaster]	12	524	2.758	0.0406987	1.46362	1.39042
NP_523469.2	ed	echinoid, isoform A [Drosophila melanogaster]	12	1332	1.125	0.715896	0.169925	0.14515
NP_524923.1	Sam-S	S-adenosylmethionine synthetase, isoform C [Drosophila melanogaster]	12	408	0.95	0.995892	-0.0740006	0.00178784
NP_732309.1	14-3-3epsilon	14-3-3epsilon, isoform A [Drosophila melanogaster]	12	262	0.588	0.809141	-0.766112	0.0919759
NP_001036444.1	p120ctn	adherens junction protein p120 [Drosophila melanogaster]	12	781	1.498	0.199859	0.583038	0.699276
NP_001246073.1	Arr1	arrestin 1, isoform B [Drosophila melanogaster]	12	364	1.35	0.403301	0.432959	0.394371
NP_652700.1	CG18858	uncharacterized protein Dmel_CG18858, isoform A [Drosophila melanogaster]	12	421	0.788	0.435761	-0.343732	0.360751
NP_001285697.1	Coprox	coproporphyrinogen oxidase, isoform B [Drosophila melanogaster]	12	390	0.678	0.184613	-0.560643	0.733738
NP_652058.1	Dek	Dek, isoform B [Drosophila melanogaster]	12	669	1.34	0.39947	0.422233	0.398516
NP_996372.1	CG2258	CG2258, isoform B [Drosophila melanogaster]	12	801	1.32	0.57453	0.400538	0.240687
NP_724614.1	Prosalpha1	proteasome alpha1 subunit, isoform A [Drosophila melanogaster]	12	244	1.233	0.384013	0.302173	0.415654
NP_477298.2	Cht2	chitinase 2, isoform A [Drosophila melanogaster]	12	484	1.212	0.613271	0.27739	0.212348
NP_610326.1	CG1882	CG1882, isoform A [Drosophila melanogaster]	12	454	1.614	0.112956	0.690641	0.947089
NP_647860.1	Chd64	Chd64, isoform B [Drosophila melanogaster]	12	188	1.543	0.416761	0.625738	0.380113
NP_001188849.1	CG16771	uncharacterized protein Dmel_CG16771, isoform C [Drosophila melanogaster]	12	596	0.968	0.982623	-0.046921	0.00761307
NP_651049.3	AP-2mu	adaptor protein complex 2, mu subunit, isoform B [Drosophila melanogaster]	12	437	2.046	0.00238464	1.03281	2.62258
NP_001259560.1	Rab3-GEF	Rab3 GDP-GTP exchange factor, isoform H [Drosophila melanogaster]	12	2154	1.883	0.066697	0.913033	1.17589
NP_001284797.1	Rbcn-3B	Rabconnectin-3B, isoform B [Drosophila melanogaster]	12	1525	1.795	0.0260207	0.843984	1.58468
NP_727075.1	schlank	schlank, isoform A [Drosophila melanogaster]	12	400	1.659	0.133314	0.730314	0.875125
NP_611790.1	eIF2B-delta	eIF2B-delta, isoform A [Drosophila melanogaster]	12	626	1.837	0.0346841	0.877352	1.45987
NP_525099.3	Hrs	hepatocyte growth factor regulated tyrosine kinase substrate, isoform B [Drosophila melanogaster]	12	760	1.616	0.175496	0.692427	0.755732
NP_001260339.1	mRpS7	mitochondrial ribosomal protein S7, isoform B [Drosophila melanogaster]	12	218	0.621	0.0242261	-0.687335	1.61572
NP_650199.1	CG5844	CG5844 [Drosophila melanogaster]	12	378	0.558	0.0146982	-0.841663	1.83273
NP_001188767.1	CG4747	CG4747, isoform B [Drosophila melanogaster]	12	603	1.816	0.131386	0.860764	0.881452
NP_611356.1	Gint3	GDI interacting protein 3, isoform D [Drosophila melanogaster]	12	441	1.517	0.175735	0.601221	0.755143
NP_001260099.1	cl	clot, isoform C [Drosophila melanogaster]	12	126	1.236	0.831106	0.305679	0.0803436
NP_649333.1	CRIF	CR6-interacting factor [Drosophila melanogaster]	12	232	1.216	0.813165	0.282143	0.0898215
NP_001260993.1	SRPK	SR protein kinase, isoform D [Drosophila melanogaster]	12	939	2.093	0.00917549	1.06557	2.03737
NP_648236.1	GstO2	glutathione S transferase O2, isoform B [Drosophila melanogaster]	12	250	1.126	0.511097	0.171207	0.291496
NP_572694.1	Dlic	dynein light intermediate chain, isoform A [Drosophila melanogaster]	12	493	2.439	0.00732786	1.28629	2.13502
NP_728590.1	CG9186	CG9186, isoform A [Drosophila melanogaster]	12	307	0.458	0.083107	-1.12658	1.08036
NP_611087.1	CysRS	Cysteinyl-tRNA synthetase [Drosophila melanogaster]	12	741	0.992	0.999999	-0.011588	3.67562e-07
NP_611952.1	CG3663	CG3663 [Drosophila melanogaster]	12	208	0.403	0.264413	-1.31115	0.577716
NP_523778.2	Dcr-2	Dicer-2, isoform A [Drosophila melanogaster]	12	1722	1.19	0.494324	0.250962	0.305989
NP_511087.1	Cp36	chorion protein 36 [Drosophila melanogaster]	12	284	0.172	0.00207851	-2.53952	2.68225
NP_651600.1	mfrn	mitoferrin [Drosophila melanogaster]	12	379	1.125	0.448135	0.169925	0.348591
NP_524690.1	DCTN2-p50	dynactin 2, p50 subunit [Drosophila melanogaster]	12	380	1.539	0.0379532	0.621993	1.42075
NP_523444.1	Spp	signal peptide peptidase [Drosophila melanogaster]	12	389	0.902	0.978232	-0.148801	0.00955795
NP_572810.1	CG1824	CG1824 [Drosophila melanogaster]	12	761	0.808	0.0870365	-0.307573	1.0603
NP_608884.1	Scox	synthesis of cytochrome c oxidase [Drosophila melanogaster]	12	251	0.611	0.0868945	-0.710756	1.06101
NP_524385.2	CREG	cellular repressor of E1A-stimulated genes, isoform A [Drosophila melanogaster]	12	211	1.525	0.10086	0.608809	0.996283
NP_001284943.1	ND-B16.6	NADH dehydrogenase (ubiquinone) B16.6 subunit, isoform B [Drosophila melanogaster]	12	154	0.449	0.114553	-1.15521	0.940995
NP_001285196.1	mew	multiple edematous wings, isoform F [Drosophila melanogaster]	12	1243	1.317	0.310916	0.397255	0.507357
NP_523768.1	Amy-d	amylase distal [Drosophila melanogaster]	12	494	0.33	9.17786e-05	-1.59946	4.03726
NP_476666.1	arm	armadillo, isoform A [Drosophila melanogaster]	12	843	2.05	0.00864445	1.03562	2.06326
NP_609119.2	CG5958	CG5958 [Drosophila melanogaster]	12	294	1.021	0.999998	0.0299829	6.7738e-07
NP_732383.1	EndoA	endophilin A, isoform A [Drosophila melanogaster]	12	369	2.098	0.000183201	1.06901	3.73707
NP_001261023.1	Atg9	Autophagy-related 9, isoform B [Drosophila melanogaster]	12	852	1.33	0.0824565	0.411426	1.08378
NP_788342.1	AGBE	1,4-Alpha-Glucan branching enzyme [Drosophila melanogaster]	12	685	1.293	0.133791	0.370722	0.873572
NP_651930.2	Gat	GABA transporter, isoform A [Drosophila melanogaster]	12	636	1.028	0.999715	0.0398403	0.000123596
NP_648837.2	IleRS-m	Isoleucyl-tRNA synthetase, mitochondrial [Drosophila melanogaster]	12	941	0.99	0.99999	-0.0144996	4.23466e-06
NP_001137633.1	Syb	synaptobrevin, isoform C [Drosophila melanogaster]	12	152	1.664	0.0580512	0.734655	1.23619
NP_724223.4	fbp	fructose-1,6-bisphosphatase, isoform F [Drosophila melanogaster]	12	343	1.318	0.068208	0.39835	1.16616
NP_612065.1	CG13890	uncharacterized protein Dmel_CG13890 [Drosophila melanogaster]	12	262	1.017	0.999981	0.0243197	8.43831e-06
NP_477412.1	nop5	nop5 [Drosophila melanogaster]	12	511	0.809	0.23766	-0.305788	0.624043
NP_524022.1	mRpL2	mitochondrial ribosomal protein L2 [Drosophila melanogaster]	12	294	1.419	0.19419	0.504875	0.711773
NP_001097606.1	ome	omega, isoform G [Drosophila melanogaster]	12	1040	0.777	0.187515	-0.364013	0.726964
NP_572332.1	CG3226	CG3226 [Drosophila melanogaster]	12	230	1.218	0.477617	0.284514	0.32092
NP_729089.2	CG10576	uncharacterized protein Dmel_CG10576, isoform C [Drosophila melanogaster]	12	391	0.854	0.367182	-0.227692	0.435119
NP_001286133.1	RpL21	ribosomal protein L21, isoform C [Drosophila melanogaster]	12	159	0.861	0.687534	-0.215915	0.162706
NP_649602.2	ECSIT	ECSIT [Drosophila melanogaster]	12	409	1.056	0.938023	0.0786098	0.0277866
NP_650931.1	CG10827	uncharacterized protein Dmel_CG10827 [Drosophila melanogaster]	12	522	0.146	0.000250846	-2.77596	3.60059
NP_610395.1	CG8735	CG8735, isoform A [Drosophila melanogaster]	12	387	1.798	0.0981301	0.846393	1.0082
NP_648588.1	nst	nesthocker [Drosophila melanogaster]	12	549	1.533	0.123463	0.616358	0.908464
NP_648239.1	CG6638	CG6638 [Drosophila melanogaster]	12	420	0.677	0.0500456	-0.562772	1.30063
NP_001263104.1	Fer1HCH	ferritin 1 heavy chain homologue, isoform I [Drosophila melanogaster]	12	245	0.563	0.0382704	-0.828793	1.41714
NP_524274.1	RpA-70	replication protein A 70 [Drosophila melanogaster]	12	603	0.545	0.0425799	-0.875672	1.3708
NP_648983.1	QIL1	QIL1 [Drosophila melanogaster]	12	122	0.578	0.246714	-0.790859	0.607806
NP_524226.1	Karybeta3	karyopherin beta 3, isoform A [Drosophila melanogaster]	12	1105	1.048	0.99853	0.0676387	0.000638788
NP_648409.1	ND-13B	NADH dehydrogenase (ubiquinone) 13 kDa B subunit [Drosophila melanogaster]	12	124	0.331	0.0806354	-1.5951	1.09347
NP_649688.1	CG1105	CG1105 [Drosophila melanogaster]	12	422	0.89	0.997927	-0.168123	0.00090135
NP_722910.2	pgant4	polypeptide GalNAc transferase 4, isoform C [Drosophila melanogaster]	12	644	0.636	0.0330241	-0.652901	1.48117
NP_723155.1	CG9175	CG9175, isoform B [Drosophila melanogaster]	12	445	1.076	0.944002	0.105678	0.0250273
NP_729634.1	CG6404	CG6404, isoform A [Drosophila melanogaster]	12	441	1.992	0.315673	0.994218	0.500763
NP_610509.2	GstT1	glutathione S transferase T1 [Drosophila melanogaster]	12	228	0.563	0.41359	-0.828793	0.38343
NP_001285747.1	RpS13	ribosomal protein S13, isoform C [Drosophila melanogaster]	12	151	1.344	0.432828	0.426533	0.363685
NP_001285987.1	yellow-b	yellow-b, isoform B [Drosophila melanogaster]	12	453	2.564	0.00488546	1.3584	2.31109
NP_609537.1	CG6766	CG6766 [Drosophila melanogaster]	12	525	1.068	0.557013	0.0949116	0.254135
NP_608929.1	CG7382	CG7382 [Drosophila melanogaster]	12	236	1.114	0.0864436	0.155749	1.06327
NP_788485.1	SrpRbeta	signal recognition particle receptor beta, isoform A [Drosophila melanogaster]	12	244	0.807	0.449611	-0.309359	0.347163
NP_730610.3	CG9391	CG9391, isoform C [Drosophila melanogaster]	12	278	1.094	0.878135	0.129613	0.0564389
NP_727427.1	PPP4R2r	protein phosphatase 4 regulatory subunit 2-related protein, isoform A [Drosophila melanogaster]	12	609	1.345	0.750603	0.427606	0.12459
NP_610813.3	CG8768	CG8768 [Drosophila melanogaster]	12	302	0.581	0.168	-0.78339	0.774691
NP_732204.1	kuk	kugelkern, isoform B [Drosophila melanogaster]	12	570	4.722	0.00164725	2.2394	2.78324
NP_787998.1	Akap200	A kinase anchor protein 200, isoform D [Drosophila melanogaster]	11	837	9.668	0.000134393	3.27322	3.87162
NP_001163746.1	scrib	scribbled, isoform L [Drosophila melanogaster]	11	2585	3.494	0.0124468	1.80488	1.90494
NP_524611.1	Ef1alpha100E	elongation factor 1alpha100E, isoform A [Drosophila melanogaster]	11	462	4.246	0.00011847	2.0861	3.92639
NP_728141.1	wupA	wings up A, isoform A [Drosophila melanogaster]	11	208	2.514	0.0257698	1.32998	1.58889
NP_524715.2	ScpX	sterol carrier protein X-related thiolase [Drosophila melanogaster]	11	544	1.162	0.975921	0.21661	0.0105854
NP_001285763.1	LManV	lysosomal alpha-mannosidase V, isoform B [Drosophila melanogaster]	11	982	0.474	0.00923776	-1.07704	2.03443
NP_611217.1	veil	veil, isoform A [Drosophila melanogaster]	11	599	0.314	0.0110631	-1.67116	1.95612
NP_572308.3	Rpt4	regulatory particle triple-A ATPase 4 [Drosophila melanogaster]	11	397	1.298	0.641607	0.37629	0.192731
NP_725602.1	CG30463	uncharacterized protein Dmel_CG30463, isoform A [Drosophila melanogaster]	11	650	1.342	0.371529	0.424385	0.430008
NP_726109.1	HmgD	high mobility group protein D, isoform A [Drosophila melanogaster]	11	112	0.967	0.999975	-0.0484122	1.07798e-05
NP_651120.1	CG6726	CG6726, isoform A [Drosophila melanogaster]	11	401	0.984	0.99945	-0.0232698	0.000238874
NP_523628.1	Cyp6a2	cytochrome P450-6a2 [Drosophila melanogaster]	11	506	0.988	0.999988	-0.0174171	5.41761e-06
NP_524270.2	mRpS9	mitochondrial ribosomal protein S9 [Drosophila melanogaster]	11	395	0.596	0.0851645	-0.746616	1.06974
NP_001284806.1	Cyp4d2	cytochrome P450-4d2, isoform B [Drosophila melanogaster]	11	501	1.511	0.17243	0.595504	0.763387
NP_477006.1	Cdc37	Cdc37 [Drosophila melanogaster]	11	389	1.534	0.119052	0.617298	0.924264
NP_524109.2	Mipp1	multiple inositol polyphosphate phosphatase 1, isoform A [Drosophila melanogaster]	11	467	1.314	0.396506	0.393965	0.40175
NP_001260514.1	Cyt-b5-r	cytochrome b5-related, isoform B [Drosophila melanogaster]	11	436	1.374	0.284443	0.458382	0.546005
NP_727499.1	Ran	Ran, isoform B [Drosophila melanogaster]	11	216	1.089	0.79446	0.123004	0.0999278
NP_610169.1	CG10417	uncharacterized protein Dmel_CG10417, isoform A [Drosophila melanogaster]	11	662	1.486	0.104566	0.571434	0.98061
NP_650501.1	CG4546	CG4546 [Drosophila melanogaster]	11	457	5.829	0.00216513	2.54325	2.66452
NP_608688.3	Cyp309a1	Cyp309a1, isoform B [Drosophila melanogaster]	11	506	1.26	0.591489	0.333424	0.228053
NP_608533.1	CG2794	CG2794 [Drosophila melanogaster]	11	700	0.642	0.0254927	-0.639355	1.59358
NP_649301.1	CG11309	uncharacterized protein Dmel_CG11309, isoform A [Drosophila melanogaster]	11	358	0.659	0.188719	-0.60165	0.724183
NP_572420.1	spidey	spidey [Drosophila melanogaster]	11	321	0.512	0.0673705	-0.965784	1.17153
NP_651114.1	CG17121	uncharacterized protein Dmel_CG17121 [Drosophila melanogaster]	11	361	2.131	6.82344e-05	1.09153	4.166
NP_524999.2	pins	partner of inscuteable [Drosophila melanogaster]	11	658	1.637	0.297264	0.711054	0.526858
NP_724342.1	His2B:CG17949	histone H2B [Drosophila melanogaster]	11	123	0.746	0.907558	-0.422752	0.0421254
NP_524180.1	alphaSnap	alpha soluble NSF attachment protein [Drosophila melanogaster]	11	292	0.82	0.973021	-0.286304	0.011878
NP_611659.2	Oatp58Dc	organic anion transporting polypeptide 58Dc, isoform A [Drosophila melanogaster]	11	789	0.853	0.396951	-0.229382	0.401263
NP_725047.2	CG30022	uncharacterized protein Dmel_CG30022 [Drosophila melanogaster]	11	279	0.738	0.0261204	-0.438307	1.58302
NP_001260465.1	UK114	UK114, isoform B [Drosophila melanogaster]	11	138	0.6	0.642189	-0.736966	0.192337
NP_731749.3	grsm	granny smith, isoform F [Drosophila melanogaster]	11	655	1.184	0.666013	0.243669	0.176517
NP_572898.1	CG32633	uncharacterized protein Dmel_CG32633, isoform A [Drosophila melanogaster]	11	285	0.312	0.00249587	-1.68038	2.60278
NP_729901.1	cmb	combover, isoform A [Drosophila melanogaster]	11	1657	2.641	0.045434	1.40108	1.34262
NP_733314.1	Cad99C	cadherin 99C, isoform A [Drosophila melanogaster]	11	1706	1.149	0.852304	0.200379	0.0694055
NP_727689.1	Jafrac1	thioredoxin peroxidase 1, isoform B [Drosophila melanogaster]	11	194	0.869	0.58736	-0.202572	0.231095
NP_649052.1	Cyp12c1	Cyp12c1, isoform A [Drosophila melanogaster]	11	524	0.763	0.662009	-0.390245	0.179136
NP_730536.1	CG11796	uncharacterized protein Dmel_CG11796, isoform A [Drosophila melanogaster]	11	380	1.258	0.588142	0.331132	0.230518
NP_524875.1	arg	arginase [Drosophila melanogaster]	11	351	2.587	8.84489e-05	1.37128	4.05331
NP_572750.3	rudhira	rudhira, isoform C [Drosophila melanogaster]	11	2075	1.389	0.511147	0.474047	0.291454
NP_001286048.1	CG10413	uncharacterized protein Dmel_CG10413, isoform B [Drosophila melanogaster]	11	941	1.11	0.392443	0.15056	0.406224
NP_724804.1	RpL31	ribosomal protein L31, isoform A [Drosophila melanogaster]	11	124	0.997	0.999999	-0.00433459	3.87128e-07
NP_611387.1	Jheh3	juvenile hormone epoxide hydrolase 3 [Drosophila melanogaster]	11	468	0.257	0.0240217	-1.96016	1.6194
NP_788538.2	CG32206	uncharacterized protein Dmel_CG32206, isoform E [Drosophila melanogaster]	11	1278	1.326	0.0647227	0.407081	1.18894
NP_648753.1	Pex3	peroxin 3, isoform A [Drosophila melanogaster]	11	385	2.206	0.00106766	1.14143	2.97157
NP_477487.1	for	foraging, isoform A [Drosophila melanogaster]	11	1088	1.286	0.848221	0.362891	0.0714908
NP_001286937.1	Src64B	Src oncogene at 64B, isoform K [Drosophila melanogaster]	11	553	1.883	0.003784	0.913033	2.42205
NP_610116.2	Ac3	Ac3, isoform A [Drosophila melanogaster]	11	1167	1.774	0.0130063	0.827006	1.88585
NP_650584.1	Irc	Immune-regulated catalase, isoform A [Drosophila melanogaster]	11	697	1.029	0.998535	0.041243	0.000636912
NP_731141.1	sas	stranded at second, isoform B [Drosophila melanogaster]	11	1693	3.31	0.00175634	1.72683	2.75539
NP_523811.1	mRpS29	mitochondrial ribosomal protein S29 [Drosophila melanogaster]	11	392	0.464	0.0695198	-1.1078	1.15789
NP_610724.1	CG8888	CG8888 [Drosophila melanogaster]	11	388	1.648	0.368915	0.720716	0.433074
NP_609362.1	CG5676	CG5676 [Drosophila melanogaster]	11	156	0.619	0.226955	-0.691989	0.64406
NP_001285541.1	CG13865	uncharacterized protein Dmel_CG13865, isoform C [Drosophila melanogaster]	11	266	1.358	0.845612	0.441483	0.0728289
NP_001246053.1	ApepP	aminopeptidase P, isoform B [Drosophila melanogaster]	11	613	0.838	0.669287	-0.254978	0.174387
NP_726557.3	Syt7	synaptotagmin 7, isoform A [Drosophila melanogaster]	11	416	1.589	0.0423231	0.668119	1.37342
NP_730432.1	CG9368	CG9368, isoform A [Drosophila melanogaster]	11	182	2.479	0.00719677	1.30976	2.14286
NP_001245944.1	Pp2A-29B	protein phosphatase 2A at 29B, isoform D [Drosophila melanogaster]	11	650	1.173	0.993651	0.230203	0.00276619
NP_651868.1	CG11334	uncharacterized protein Dmel_CG11334, isoform B [Drosophila melanogaster]	11	364	1.506	0.102753	0.590722	0.988206
NP_523828.1	mRpL43	mitochondrial ribosomal protein L43 [Drosophila melanogaster]	11	192	1.028	0.996651	0.0398403	0.0014567
NP_730944.2	Pi4KIIalpha	Pi4KIIalpha, isoform A [Drosophila melanogaster]	11	710	1.472	0.15301	0.557778	0.81528
NP_649030.1	Cyp312a1	Cyp312a1, isoform A [Drosophila melanogaster]	11	510	2.148	0.0072564	1.10299	2.13928
NP_476687.1	Ptp61F	protein tyrosine phosphatase 61F, isoform A [Drosophila melanogaster]	11	548	1.521	0.00649931	0.60502	2.18713
NP_572304.5	CG3566	CG3566, isoform B [Drosophila melanogaster]	11	117	0.636	0.270649	-0.652901	0.567593
NP_001260638.1	CG9319	CG9319, isoform B [Drosophila melanogaster]	11	373	1.035	0.999512	0.0496308	0.000211852
NP_652046.1	CG11899	uncharacterized protein Dmel_CG11899 [Drosophila melanogaster]	11	364	1.062	0.971699	0.0867838	0.0124681
NP_572487.3	PIP82	PIP82 [Drosophila melanogaster]	11	1195	1.934	0.217217	0.951588	0.663106
NP_001286002.1	tweek	tweek, isoform J [Drosophila melanogaster]	11	5150	1.396	0.154193	0.481299	0.811937
NP_611119.1	CG7997	CG7997, isoform A [Drosophila melanogaster]	11	417	0.981	0.999914	-0.027675	3.71526e-05
NP_726315.1	CG13551	uncharacterized protein Dmel_CG13551, isoform B [Drosophila melanogaster]	11	107	0.456	0.458814	-1.13289	0.338364
NP_610985.1	ND-B15	NADH dehydrogenase (ubiquinone) B15 subunit [Drosophila melanogaster]	11	113	0.207	0.0949309	-2.2723	1.02259
NP_001262957.1	Dhap-at	dihydroxyacetone phosphate acyltransferase, isoform C [Drosophila melanogaster]	11	807	1.268	0.129936	0.342555	0.886272
NP_572345.1	CG3168	CG3168, isoform A [Drosophila melanogaster]	11	632	2.451	0.000337613	1.29337	3.47158
NP_001259569.1	HDAC6	histone deacetylase 6, isoform G [Drosophila melanogaster]	11	1179	1.226	0.575908	0.293959	0.239647
NP_723722.2	Pex19	peroxin 19, isoform C [Drosophila melanogaster]	11	292	1.42	0.688032	0.505891	0.162391
NP_572436.1	CG2254	CG2254 [Drosophila melanogaster]	11	320	0.953	0.875277	-0.0694519	0.0578543
NP_722796.1	Rab5	Rab5, isoform B [Drosophila melanogaster]	11	219	0.881	0.918207	-0.182786	0.0370594
NP_726155.1	Synj	synaptojanin, isoform A [Drosophila melanogaster]	11	1218	1.337	0.0320256	0.418999	1.4945
NP_651407.3	Npl4	nuclear protein localization 4, isoform A [Drosophila melanogaster]	11	652	1.242	0.333806	0.312665	0.476506
NP_650565.2	CG10340	uncharacterized protein Dmel_CG10340 [Drosophila melanogaster]	11	278	0.716	0.300996	-0.481969	0.52144
NP_001247010.1	CG16817	uncharacterized protein Dmel_CG16817, isoform B [Drosophila melanogaster]	11	184	1.328	0.328578	0.409255	0.483361
NP_730633.1	Syx7	syntaxin 7, isoform B [Drosophila melanogaster]	11	282	1.653	0.109527	0.725087	0.960477
NP_649541.1	mRpL44	mitochondrial ribosomal protein L44 [Drosophila melanogaster]	11	321	0.826	0.780186	-0.275786	0.107802
NP_524130.1	Adgf-A	adenosine deaminase-related growth factor A, isoform A [Drosophila melanogaster]	11	553	0.347	0.000379027	-1.52699	3.42133
NP_610831.1	CG13321	uncharacterized protein Dmel_CG13321, isoform A [Drosophila melanogaster]	11	286	0.98	0.999992	-0.0291463	3.43202e-06
NP_648067.2	CG9953	CG9953 [Drosophila melanogaster]	11	508	0.324	0.00276813	-1.62593	2.55781
NP_001247003.1	RhoL	Rho-like, isoform B [Drosophila melanogaster]	11	214	0.949	0.987626	-0.07552	0.0054075
NP_651646.2	CG14526	uncharacterized protein Dmel_CG14526 [Drosophila melanogaster]	11	707	1.109	0.932012	0.149259	0.0305785
NP_652013.1	cathD	cathD, isoform A [Drosophila melanogaster]	11	392	0.847	0.821975	-0.239566	0.0851411
NP_524363.3	mRpL9	mitochondrial ribosomal protein L9 [Drosophila melanogaster]	11	248	1.116	0.803959	0.158337	0.0947659
NP_572160.1	CG2982	CG2982, isoform B [Drosophila melanogaster]	11	653	0.924	0.997435	-0.114035	0.00111551
NP_524275.1	mRpL1	mitochondrial ribosomal protein L1 [Drosophila melanogaster]	11	354	0.961	0.996337	-0.0573917	0.00159387
NP_609204.2	Ostgamma	oligosaccharide transferase gamma subunit [Drosophila melanogaster]	11	330	1.046	0.955341	0.0648829	0.0198414
NP_524651.2	chb	chromosome bows, isoform A [Drosophila melanogaster]	11	1491	2.722	0.00463918	1.44467	2.33356
NP_524808.3	Ef1beta	elongation factor 1 beta, isoform B [Drosophila melanogaster]	11	222	0.559	0.816332	-0.83908	0.0881333
NP_609075.1	CG11236	uncharacterized protein Dmel_CG11236, isoform A [Drosophila melanogaster]	11	341	1.883	0.109536	0.913033	0.960442
NP_650257.1	pic	piccolo [Drosophila melanogaster]	11	1140	1.01	0.999977	0.0143553	9.78667e-06
NP_610093.1	CG9248	CG9248, isoform B [Drosophila melanogaster]	11	494	1.031	0.99963	0.0440443	0.000160687
NP_001246914.1	Nep2	neprilysin 2, isoform B [Drosophila melanogaster]	11	774	0.884	0.894152	-0.177882	0.0485885
NP_731825.1	sqd	squid, isoform B [Drosophila melanogaster]	11	344	1.422	0.348458	0.507921	0.45785
NP_996366.1	l(1)G0193	lethal (1) G0193, isoform B [Drosophila melanogaster]	11	646	0.927	0.974419	-0.109359	0.0112542
NP_729679.2	IRSp53	IRSp53, isoform A [Drosophila melanogaster]	11	1076	6.71	0.00363477	2.74631	2.43952
NP_524417.1	2020-09-02	septin 2, isoform A [Drosophila melanogaster]	11	419	2.054	0.0117682	1.03844	1.92929
NP_524557.1	Nlp	nucleoplasmin, isoform A [Drosophila melanogaster]	11	152	1.231	0.586544	0.299831	0.231699
NP_788055.2	CG33090	uncharacterized protein Dmel_CG33090, isoform B [Drosophila melanogaster]	11	948	0.899	0.774675	-0.153607	0.11088
NP_733060.1	PIG-S	phosphatidylinositol glycan anchor biosynthesis, class S [Drosophila melanogaster]	11	536	0.746	0.0742309	-0.422752	1.12942
NP_651954.3	RpL10	ribosomal protein L10, isoform C [Drosophila melanogaster]	11	218	0.948	0.991313	-0.077041	0.00378916
NP_573385.1	ND-18	NADH dehydrogenase (ubiquinone) 18 kDa subunit [Drosophila melanogaster]	11	183	0.745	0.701659	-0.424688	0.153874
NP_649588.1	Rpn5	regulatory particle non-ATPase 5 [Drosophila melanogaster]	11	502	1.83	0.024455	0.871844	1.61163
NP_524321.1	Ho	heme oxygenase [Drosophila melanogaster]	11	296	0.579	0.472782	-0.788365	0.325339
NP_477046.1	Ance	angiotensin converting enzyme, isoform A [Drosophila melanogaster]	11	615	1.519	0.428001	0.603122	0.368555
NP_001259536.2	CtsB1	cathepsin B1, isoform C [Drosophila melanogaster]	11	340	0.613	0.105369	-0.706041	0.977286
NP_476929.1	Nmdmc	NAD-dependent methylenetetrahydrofolate dehydrogenase, isoform B [Drosophila melanogaster]	11	309	1.077	0.583627	0.107018	0.233865
NP_523827.1	l(2)efl	lethal (2) essential for life, isoform A [Drosophila melanogaster]	11	187	2.063	0.108482	1.04474	0.964643
NP_723952.1	Ca-alpha1D	Ca[2+]-channel protein alpha[[1]] subunit D, isoform C [Drosophila melanogaster]	11	2552	2.985	0.0103514	1.57773	1.985
NP_511075.3	sws	swiss cheese, isoform A [Drosophila melanogaster]	11	1425	2.346	0.0142082	1.2302	1.84746
NP_996373.1	Gclc	Glutamate-cysteine ligase catalytic subunit, isoform B [Drosophila melanogaster]	11	717	1.046	0.994929	0.0648829	0.00220786
NP_524655.1	Gk1	glycerol kinase 1, isoform A [Drosophila melanogaster]	11	538	0.503	0.0174571	-0.99137	1.75803
NP_609930.4	CG31793	uncharacterized protein Dmel_CG31793, isoform A [Drosophila melanogaster]	10	1307	0.746	0.802102	-0.422752	0.0957702
NP_650086.2	Mrp4	multidrug resistance protein 4 [Drosophila melanogaster]	10	1316	1.295	0.239668	0.372952	0.62039
NP_524339.1	Hsc70-2	heat shock protein cognate 2 [Drosophila melanogaster]	10	633	2.932	0.0743928	1.55189	1.12847
NP_611000.2	Cyp6a23	Cyp6a23 [Drosophila melanogaster]	10	502	3.556	0.000535059	1.83026	3.2716
NP_648467.1	CG6140	CG6140, isoform A [Drosophila melanogaster]	10	470	3.771	0.000597905	1.91495	3.22337
NP_611385.1	Jheh1	juvenile hormone epoxide hydrolase 1 [Drosophila melanogaster]	10	474	0.702	0.620553	-0.510457	0.207221
NP_524543.1	Hrb98DE	heterogeneous nuclear ribonucleoprotein at 98DE, isoform B [Drosophila melanogaster]	10	365	1.838	0.0441923	0.878137	1.35465
NP_650782.1	Cyp12a5	Cyp12a5 [Drosophila melanogaster]	10	536	0.513	0.337061	-0.962969	0.472292
NP_524828.1	Cyp4p1	cytochrome P450-4p1 [Drosophila melanogaster]	10	513	0.789	0.569388	-0.341903	0.244592
NP_731699.2	CG10097	uncharacterized protein Dmel_CG10097, isoform C [Drosophila melanogaster]	10	501	0.319	0.00727953	-1.64837	2.1379
NP_001245762.1	Cdc42	Cdc42, isoform C [Drosophila melanogaster]	10	191	1.164	0.720249	0.219091	0.142517
NP_610284.1	p47	p47 [Drosophila melanogaster]	10	407	1.403	0.243575	0.488515	0.613367
NP_730777.1	ND-MLRQ	NADH dehydrogenase (ubiquinone) MLRQ subunit, isoform A [Drosophila melanogaster]	10	83	0.429	0.0994833	-1.22095	1.00225
NP_001284863.1	CG11444	uncharacterized protein Dmel_CG11444, isoform B [Drosophila melanogaster]	10	215	1.689	0.447417	0.756169	0.349287
NP_649694.1	CG10098	uncharacterized protein Dmel_CG10098 [Drosophila melanogaster]	10	353	2.039	0.00491002	1.02786	2.30892
NP_731927.1	His4r	histone H4 replacement, isoform A [Drosophila melanogaster]	10	103	0.334	0.635912	-1.58208	0.196603
NP_611660.1	CG5819	CG5819, isoform A [Drosophila melanogaster]	10	915	0.616	0.0230568	-0.698998	1.6372
NP_612043.1	Reg-2	rhythmically expressed gene 2 [Drosophila melanogaster]	10	260	1.378	0.198201	0.462576	0.702894
NP_001261269.1	nSyb	neuronal synaptobrevin, isoform J [Drosophila melanogaster]	10	206	1.826	0.250213	0.868687	0.60169
NP_608375.1	CG9577	CG9577 [Drosophila melanogaster]	10	312	0.641	0.478801	-0.641604	0.319845
NP_001261143.1	asrij	asrij, isoform B [Drosophila melanogaster]	10	258	1.188	0.905319	0.248535	0.0431984
NP_652600.1	Alk	anaplastic lymphoma kinase, isoform A [Drosophila melanogaster]	10	1701	1.668	0.0869926	0.738119	1.06052
NP_477469.1	gammaSnap1	gamma soluble NSF attachment protein 1 [Drosophila melanogaster]	10	302	0.635	0.680705	-0.655172	0.167041
NP_523365.2	caz	cabeza, isoform B [Drosophila melanogaster]	10	399	1.582	0.439239	0.66175	0.357299
NP_647875.1	Cpr64Ad	cuticular protein 64Ad [Drosophila melanogaster]	10	247	1.127	0.974615	0.172488	0.011167
NP_649905.1	CG8199	CG8199 [Drosophila melanogaster]	10	439	0.614	0.0732102	-0.703689	1.13543
NP_651341.2	Clbn	caliban, isoform C [Drosophila melanogaster]	10	992	1.489	0.0121149	0.574344	1.91668
NP_610426.2	AIMP1	aaRS-interacting multifunctional protein 1 [Drosophila melanogaster]	10	323	1.444	0.0785977	0.530071	1.10459
NP_525092.1	Prosalpha4	proteasome alpha4 subunit [Drosophila melanogaster]	10	249	1.087	0.953211	0.120352	0.020811
NP_001285097.1	Ork1	open rectifier K[+] channel 1, isoform C [Drosophila melanogaster]	10	1019	0.584	0.0377496	-0.77596	1.42309
NP_611254.2	CG4984	CG4984, isoform A [Drosophila melanogaster]	10	440	1.646	0.00454553	0.718964	2.34242
NP_733100.1	CG31087	uncharacterized protein Dmel_CG31087, isoform A [Drosophila melanogaster]	10	417	0.282	0.0154376	-1.82623	1.81142
NP_524120.1	TSG101	tumor susceptibility gene 101 [Drosophila melanogaster]	10	408	1.526	0.0355704	0.609755	1.44891
NP_001246856.1	CG10565	uncharacterized protein Dmel_CG10565, isoform B [Drosophila melanogaster]	10	646	1.364	0.453944	0.447844	0.342998
NP_001285435.1	out	outsiders, isoform B [Drosophila melanogaster]	10	655	1.025	0.999895	0.0356239	4.56636e-05
NP_477258.1	Idgf1	imaginal disc growth factor 1 [Drosophila melanogaster]	10	439	1.431	0.0268441	0.517024	1.57115
NP_609916.5	CG10602	uncharacterized protein Dmel_CG10602, isoform F [Drosophila melanogaster]	10	684	0.984	0.999951	-0.0232698	2.13561e-05
NP_001138101.1	CG31145	uncharacterized protein Dmel_CG31145, isoform C [Drosophila melanogaster]	10	980	3.368	0.000499953	1.75189	3.30107
NP_524104.2	mRpS34	mitochondrial ribosomal protein S34 [Drosophila melanogaster]	10	188	0.657	0.288984	-0.606035	0.539126
NP_001261952.1	mbf1	multiprotein bridging factor 1, isoform E [Drosophila melanogaster]	10	188	2.806	0.0535445	1.48852	1.27129
NP_001036571.2	CG9380	CG9380, isoform G [Drosophila melanogaster]	10	850	0.298	0.00443659	-1.74662	2.35295
NP_651960.2	trio	trio, isoform A [Drosophila melanogaster]	10	2263	2.553	0.0378213	1.35219	1.42226
NP_611352.1	Eip55E	Eip55E, isoform A [Drosophila melanogaster]	10	393	1.102	0.925313	0.140124	0.0337114
NP_609688.3	CG16886	uncharacterized protein Dmel_CG16886, isoform A [Drosophila melanogaster]	10	373	1.631	0.160217	0.705757	0.79529
NP_995868.1	RhoGEF2	Rho guanine nucleotide exchange factor 2, isoform F [Drosophila melanogaster]	10	2559	2.243	0.035354	1.16543	1.45156
NP_787958.1	crq	croquemort, isoform B [Drosophila melanogaster]	10	491	1.043	0.966849	0.0607392	0.0146415
NP_524331.2	Arp1	Actin-related protein 1 [Drosophila melanogaster]	10	376	1.039	0.999883	0.0551957	5.09924e-05
NP_649451.1	Vps24	vacuolar protein sorting 24, isoform A [Drosophila melanogaster]	10	223	2.349	0.00836838	1.23205	2.07736
NP_725952.1	CG11200	carbonyl reductase, isoform A [Drosophila melanogaster]	10	355	0.768	0.609162	-0.380822	0.215267
NP_573331.1	CG7280	CG7280 [Drosophila melanogaster]	10	573	1.125	0.894349	0.169925	0.0484932
NP_001036319.2	stnB	stoned B, isoform E [Drosophila melanogaster]	10	1262	1.834	0.18915	0.874994	0.723194
NP_001163238.2	Sdc	syndecan, isoform J [Drosophila melanogaster]	10	495	1.415	0.346654	0.500802	0.460103
NP_001246525.1	Mtch	mitochondrial carrier homolog 1, isoform E [Drosophila melanogaster]	10	316	0.902	0.865535	-0.148801	0.0627155
NP_725867.1	wbl	windbeutel, isoform A [Drosophila melanogaster]	10	257	2.417	0.16476	1.27322	0.783149
NP_477004.5	ChAT	choline acetyltransferase, isoform A [Drosophila melanogaster]	10	721	1.037	0.99747	0.0524159	0.00110017
NP_569913.1	Lrpprc2	Leucine-rich pentatricopeptide repeat containing 2 [Drosophila melanogaster]	10	1072	0.91	0.77329	-0.136062	0.111658
NP_650528.1	CG6126	CG6126 [Drosophila melanogaster]	10	555	1.842	0.0163552	0.881273	1.78634
NP_001284821.1	CG2841	CG2841, isoform F [Drosophila melanogaster]	10	1239	1.302	0.736599	0.380729	0.132769
NP_650338.1	twf	twinfilin [Drosophila melanogaster]	10	343	1.72	0.00280864	0.782409	2.5515
NP_610679.1	Tapdelta	Translocon-associated protein delta, isoform A [Drosophila melanogaster]	10	166	0.868	0.939032	-0.204233	0.0273196
NP_611116.2	Nox	NADPH oxidase, isoform E [Drosophila melanogaster]	10	1340	1.53	0.0420823	0.613532	1.3759
NP_649242.1	CG4825	CG4825, isoform A [Drosophila melanogaster]	10	498	1.289	0.581663	0.366252	0.235329
NP_001163133.1	CG44250	uncharacterized protein Dmel_CG44250, isoform C [Drosophila melanogaster]	10	297	0.623	0.0120897	-0.682696	1.91758
NP_727492.1	Klp10A	Kinesin-like protein at 10A, isoform C [Drosophila melanogaster]	10	805	1.227	0.458157	0.295135	0.338985
NP_524545.2	Pkc98E	protein C kinase 98E, isoform A [Drosophila melanogaster]	10	739	1.662	0.0139902	0.73292	1.85418
NP_572622.1	CG17841	uncharacterized protein Dmel_CG17841 [Drosophila melanogaster]	10	429	0.945	0.960641	-0.0816138	0.0174388
NP_651924.2	Asator	asator, isoform D [Drosophila melanogaster]	10	1349	2.935	0.456329	1.55336	0.340722
NP_524756.2	Uba2	ubiquitin activating enzyme 2 [Drosophila melanogaster]	10	700	1.219	0.454809	0.285698	0.342171
NP_611751.1	l(2)k09913	lethal (2) k09913, isoform C [Drosophila melanogaster]	10	389	0.939	0.987585	-0.0908029	0.0054256
NP_650062.1	scpr-A	SCP-containing protein A [Drosophila melanogaster]	10	264	6.375	0.000441862	2.67243	3.35471
NP_609015.2	CG9498	CG9498 [Drosophila melanogaster]	10	424	0.347	0.00743612	-1.52699	2.12865
NP_001014659.1	slo	slowpoke, isoform I [Drosophila melanogaster]	10	1213	2.211	0.00310885	1.1447	2.5074
NP_724578.1	boca	boca [Drosophila melanogaster]	10	180	1.257	0.91318	0.329985	0.0394434
NP_723791.2	Pect	phosphoethanolamine cytidylyltransferase, isoform C [Drosophila melanogaster]	10	374	3.292	0.000257121	1.71896	3.58986
NP_726992.2	spoon	spoonbill, isoform C [Drosophila melanogaster]	10	607	2.21	0.0263276	1.14405	1.57959
NP_525065.1	cib	ciboulot, isoform B [Drosophila melanogaster]	10	129	1.39	0.828341	0.475085	0.081791
NP_001245976.1	l(2)gd1	lethal (2) giant discs 1, isoform B [Drosophila melanogaster]	10	834	1.52	0.251547	0.604071	0.59938
NP_524314.2	Ugt35a	UDP-glycosyltransferase 35a [Drosophila melanogaster]	10	537	0.674	0.216649	-0.56918	0.664243
NP_726463.1	ATPsynF	ATP synthase, subunit F, isoform A [Drosophila melanogaster]	10	107	0.369	0.190479	-1.43831	0.720154
NP_788752.2	Ppn	papilin, isoform E [Drosophila melanogaster]	10	2898	0.771	0.321057	-0.375197	0.493419
NP_573081.1	ArgRS	Arginyl-tRNA synthetase [Drosophila melanogaster]	10	665	1.301	0.0425809	0.379621	1.37079
NP_733350.1	CG31030	uncharacterized protein Dmel_CG31030, isoform A [Drosophila melanogaster]	10	384	2.12	0.000883634	1.08406	3.05373
NP_001261116.1	CG30389	uncharacterized protein Dmel_CG30389, isoform E [Drosophila melanogaster]	10	1037	1.174	0.895511	0.231432	0.0479292
NP_608818.4	CG3714	CG3714, isoform B [Drosophila melanogaster]	10	667	1.961	0.0428324	0.97159	1.36823
NP_536791.1	l(2)37Bb	lethal (2) 37Bb [Drosophila melanogaster]	10	515	1.078	0.963842	0.108357	0.0159941
NP_523893.1	mRpS35	mitochondrial ribosomal protein S35 [Drosophila melanogaster]	10	326	0.577	0.0235945	-0.793357	1.62719
NP_610541.1	Adam	adam, isoform A [Drosophila melanogaster]	10	236	1.756	0.0276418	0.812293	1.55843
NP_729802.1	CG32103	uncharacterized protein Dmel_CG32103, isoform B [Drosophila melanogaster]	10	583	0.807	0.797924	-0.309359	0.0980382
NP_001033837.1	Cp7Fa	chorion protein a at 7F [Drosophila melanogaster]	10	293	0.169	0.00388173	-2.5649	2.41097
NP_651417.1	RpL27	ribosomal protein L27, isoform A [Drosophila melanogaster]	10	135	0.974	0.998628	-0.0380063	0.000596087
NP_001262890.1	CG13601	uncharacterized protein Dmel_CG13601, isoform B [Drosophila melanogaster]	10	277	0.48	0.240761	-1.05889	0.618414
NP_599139.1	Nacalpha	nascent polypeptide associated complex protein alpha subunit, isoform A [Drosophila melanogaster]	10	217	1.378	0.0822545	0.462576	1.08484
NP_524178.2	Clc	clathrin light chain, isoform A [Drosophila melanogaster]	10	219	4.518	0.0038758	2.17568	2.41164
NP_647985.1	Ppat-Dpck	bifunctional phosphopantetheine adenylyltransferase - Dephospho-CoA kinase [Drosophila melanogaster]	10	518	0.804	0.49018	-0.314733	0.309645
NP_648091.1	RpL18	ribosomal protein L18, isoform A [Drosophila melanogaster]	10	188	0.976	0.999748	-0.0350469	0.0001095
NP_787975.1	CG15630	uncharacterized protein Dmel_CG15630 [Drosophila melanogaster]	10	450	1.704	0.041874	0.768925	1.37806
NP_572886.2	GstT4	glutathione S transferase T4 [Drosophila melanogaster]	10	237	0.92	0.673461	-0.120294	0.171688
NP_726038.1	Pu	punch, isoform A [Drosophila melanogaster]	10	324	2.553	0.00322524	1.35219	2.49144
NP_524780.1	msk	moleskin [Drosophila melanogaster]	10	1049	1.146	0.791862	0.196607	0.101351
NP_572273.2	GAA1	glycosylphosphatidylinositol anchor attachment 1 [Drosophila melanogaster]	10	674	0.909	0.883114	-0.137648	0.0539833
NP_723332.1	Tg	transglutaminase, isoform B [Drosophila melanogaster]	10	768	1.21	0.479264	0.275007	0.319425
NP_609588.1	CG6180	CG6180 [Drosophila melanogaster]	10	257	1.052	0.957233	0.0731347	0.0189825
NP_001247091.1	Abi	abelson interacting protein, isoform D [Drosophila melanogaster]	10	477	2.149	0.00804844	1.10367	2.09429
NP_648272.1	pix	pixie, isoform A [Drosophila melanogaster]	10	611	0.968	0.999393	-0.046921	0.000263751
NP_609645.2	CG9302	CG9302 [Drosophila melanogaster]	10	510	1.463	0.129251	0.54893	0.888568
NP_001162751.1	rdgB	retinal degeneration B, isoform H [Drosophila melanogaster]	10	1263	1.615	0.654084	0.691534	0.184366
NP_001188709.1	CG5171	CG5171, isoform D [Drosophila melanogaster]	10	296	0.957	0.989408	-0.0634092	0.00462441
NP_651353.1	CG11851	uncharacterized protein Dmel_CG11851 [Drosophila melanogaster]	10	623	1.243	0.710532	0.313826	0.148417
NP_608858.3	Clect27	C-type lectin 27kD, isoform A [Drosophila melanogaster]	10	231	2.29	0.00587402	1.19535	2.23106
NP_001287408.1	GluClalpha	GluClalpha, isoform N [Drosophila melanogaster]	10	463	1.546	0.00247096	0.62854	2.60713
NP_788678.1	Spn88Ea	serpin 88Ea, isoform B [Drosophila melanogaster]	10	427	0.924	0.960847	-0.114035	0.0173457
NP_001261925.1	Zn72D	Zinc-finger protein at 72D, isoform C [Drosophila melanogaster]	10	884	1.533	0.177094	0.616358	0.751796
NP_728809.1	prominin-like	prominin-like, isoform A [Drosophila melanogaster]	10	1013	1.342	0.0493473	0.424385	1.30674
NP_609034.1	Sec61alpha	Sec61 alpha subunit, isoform A [Drosophila melanogaster]	10	476	0.645	0.435215	-0.632629	0.361296
NP_569951.1	Pgam5	phosphoglycerate mutase 5, isoform A [Drosophila melanogaster]	10	289	0.65	0.00423229	-0.621488	2.37342
NP_651592.2	mil	milkah [Drosophila melanogaster]	10	283	8.641	0.00037869	3.1112	3.42172
NP_650867.1	CG5023	CG5023 [Drosophila melanogaster]	10	169	1.735	0.133177	0.794936	0.875572
NP_610358.1	Obp44a	Odorant-binding protein 44a, isoform A [Drosophila melanogaster]	10	143	1.263	0.984938	0.336855	0.00659115
NP_001259877.1	cpb	capping protein beta, isoform B [Drosophila melanogaster]	10	276	1.354	0.279361	0.437228	0.553835
NP_001262882.1	Hrd3	HMG-coA reductase degradation 3, isoform B [Drosophila melanogaster]	10	819	1.057	0.963188	0.0799754	0.0162891
NP_001262580.1	smp-30	senescence marker protein-30, isoform C [Drosophila melanogaster]	10	306	0.742	0.0411347	-0.430509	1.38579
NP_649857.1	CG11980	uncharacterized protein Dmel_CG11980, isoform C [Drosophila melanogaster]	10	359	0.768	0.13991	-0.380822	0.854152
NP_569856.2	CG5254	CG5254, isoform A [Drosophila melanogaster]	10	306	0.893	0.880481	-0.163268	0.05528
NP_612094.2	CG9149	CG9149 [Drosophila melanogaster]	10	392	1.368	0.661041	0.452068	0.179772
NP_650918.1	AdSS	adenylosuccinate synthetase [Drosophila melanogaster]	10	447	1.183	0.440112	0.24245	0.356437
NP_727371.1	CG9691	CG9691, isoform B [Drosophila melanogaster]	10	121	2.645	0.105262	1.40327	0.977729
NP_001260800.2	LRP1	LDL receptor protein 1, isoform F [Drosophila melanogaster]	10	4752	1.233	0.287357	0.302173	0.541578
NP_723361.1	Su(var)205	suppressor of variegation 205, isoform B [Drosophila melanogaster]	10	206	1.201	0.963244	0.264236	0.0162637
NP_572448.1	alpha-PheRS	Phenylalanyl-tRNA synthetase, alpha-subunit [Drosophila melanogaster]	10	498	1.335	0.259515	0.41684	0.585837
NP_651435.1	CG5886	CG5886 [Drosophila melanogaster]	10	515	3.694	0.00033067	1.88518	3.4806
NP_001246082.2	CG17323	uncharacterized protein Dmel_CG17323, isoform E [Drosophila melanogaster]	10	519	1.543	0.00690471	0.625738	2.16085
NP_727278.1	CG12065	uncharacterized protein Dmel_CG12065, isoform B [Drosophila melanogaster]	10	687	0.95	0.94154	-0.0740006	0.0261614
NP_727150.1	Inx2	innexin 2, isoform B [Drosophila melanogaster]	10	367	0.584	0.648068	-0.77596	0.188379
NP_524646.5	ras	raspberry, isoform E [Drosophila melanogaster]	10	537	1.035	0.989364	0.0496308	0.00464411
NP_001261794.1	Syx13	syntaxin 13, isoform B [Drosophila melanogaster]	10	284	1.702	0.0429015	0.767231	1.36753
NP_611544.1	CG10527	uncharacterized protein Dmel_CG10527 [Drosophila melanogaster]	10	296	1.909	0.0193702	0.932817	1.71286
NP_732033.1	Atx2	Ataxin-2, isoform B [Drosophila melanogaster]	10	1084	2.423	0.00829327	1.27679	2.08127
NP_001097928.1	LpR2	lipophorin receptor 2, isoform E [Drosophila melanogaster]	10	1064	1.351	0.154812	0.434028	0.810195
NP_724594.1	CG30493	uncharacterized protein Dmel_CG30493 [Drosophila melanogaster]	10	326	1.173	0.923684	0.230203	0.0344767
NP_731544.1	RpS25	ribosomal protein S25, isoform B [Drosophila melanogaster]	10	117	1.349	0.519024	0.43189	0.284812
NP_001261049.1	Mtap	methylthioadenosine phosphorylase, isoform B [Drosophila melanogaster]	10	360	1.033	0.998794	0.0468403	0.000523873
NP_001246121.1	CG43346	uncharacterized protein Dmel_CG43346, isoform A [Drosophila melanogaster]	10	150	1.21	0.872291	0.275007	0.0593386
NP_476699.1	Ras85D	Ras oncogene at 85D [Drosophila melanogaster]	10	189	1.332	0.125271	0.413594	0.902149
NP_001260439.1	CG5945	CG5945, isoform B [Drosophila melanogaster]	10	250	0.835	0.785804	-0.260152	0.104686
NP_001246677.1	CG43078	uncharacterized protein Dmel_CG43078, isoform G [Drosophila melanogaster]	9	2455	2.24	0.0387645	1.1635	1.41157
NP_723346.2	Bsg	basigin, isoform G [Drosophila melanogaster]	9	648	1.394	0.0530887	0.479231	1.275
NP_525108.2	Gapdh1	glyceraldehyde 3 phosphate dehydrogenase 1, isoform A [Drosophila melanogaster]	9	332	1.198	0.898052	0.260628	0.0466986
NP_477117.2	Cyp4e2	cytochrome P450-4e2, isoform A [Drosophila melanogaster]	9	526	1.608	0.00387985	0.685267	2.41118
NP_650042.2	CG4706	CG4706 [Drosophila melanogaster]	9	783	8.033	0.000236826	3.00594	3.62557
NP_648622.1	CG11267	uncharacterized protein Dmel_CG11267 [Drosophila melanogaster]	9	103	0.243	0.0514904	-2.04097	1.28827
NP_650333.1	CG9920	CG9920 [Drosophila melanogaster]	9	102	8.259	0.000147106	3.04597	3.83237
NP_524298.1	Snap24	Synaptosomal-associated protein 24kDa [Drosophila melanogaster]	9	212	1.616	0.00354539	0.692427	2.45034
NP_730974.1	CG31548	uncharacterized protein Dmel_CG31548 [Drosophila melanogaster]	9	256	0.644	0.135282	-0.634867	0.868762
NP_788413.4	Jheh2	juvenile hormone epoxide hydrolase 2, isoform D [Drosophila melanogaster]	9	463	1.099	0.9968	0.136191	0.00139194
NP_001285723.1	Rack1	receptor of activated protein kinase C 1, isoform D [Drosophila melanogaster]	9	318	0.949	0.998901	-0.07552	0.000477641
NP_572631.3	nocte	no circadian temperature entrainment, isoform A [Drosophila melanogaster]	9	2309	1.452	0.00573963	0.538041	2.24112
NP_730282.1	Nedd4	Nedd4, isoform K [Drosophila melanogaster]	9	834	1.136	0.945292	0.183963	0.0244338
NP_523570.3	yellow-c	yellow-c, isoform A [Drosophila melanogaster]	9	438	3.119	0.0016649	1.64108	2.77861
NP_001285556.1	Lsp1beta	larval serum protein 1 beta, isoform B [Drosophila melanogaster]	9	789	9.303	0.00145524	3.2177	2.83706
NP_001261606.1	CG43783	uncharacterized protein Dmel_CG43783, isoform G [Drosophila melanogaster]	9	1248	2.147	0.0615659	1.10232	1.21066
NP_729808.1	CG10638	uncharacterized protein Dmel_CG10638, isoform A [Drosophila melanogaster]	9	317	0.946	0.988574	-0.0800879	0.0049909
NP_610206.1	Cyp6w1	Cyp6w1, isoform A [Drosophila melanogaster]	9	514	3.202	0.00939653	1.67897	2.02703
NP_731635.2	ClC-a	chloride channel-a, isoform A [Drosophila melanogaster]	9	1176	1.412	0.252662	0.49774	0.59746
NP_001245588.1	CG7766	CG7766, isoform H [Drosophila melanogaster]	9	1358	3.313	0.000907079	1.72814	3.04235
NP_610780.1	CG8520	CG8520, isoform A [Drosophila melanogaster]	9	458	0.733	0.444969	-0.448115	0.35167
NP_650494.2	alpha-Man-IIb	alpha-Mannosidase class II b, isoform A [Drosophila melanogaster]	9	1249	1.933	0.0256784	0.950842	1.59043
NP_611180.1	CG8963	CG8963, isoform A [Drosophila melanogaster]	9	559	1.835	0.185794	0.87578	0.730969
NP_647949.1	CG4611	CG4611 [Drosophila melanogaster]	9	703	0.738	0.269416	-0.438307	0.569577
NP_649527.1	CG11999	uncharacterized protein Dmel_CG11999 [Drosophila melanogaster]	9	216	1.216	0.977138	0.282143	0.010044
NP_610737.1	EndoG	endonuclease G [Drosophila melanogaster]	9	310	1.423	0.443961	0.508936	0.352655
NP_610183.1	CG7791	CG7791 [Drosophila melanogaster]	9	699	1.077	0.831885	0.107018	0.0799365
NP_001097501.1	Cip4	Cdc42-interacting protein 4, isoform B [Drosophila melanogaster]	9	665	0.832	0.716891	-0.265345	0.144547
NP_001285268.1	Ahcy	adenosylhomocysteinase, isoform C [Drosophila melanogaster]	9	432	0.75	0.0683295	-0.415037	1.16539
NP_726437.2	CG3394	CG3394, isoform A [Drosophila melanogaster]	9	687	1.793	0.0341936	0.842375	1.46606
NP_001285678.1	COX5B	cytochrome c oxidase subunit 5B, isoform B [Drosophila melanogaster]	9	120	0.723	0.688075	-0.467932	0.162364
NP_001284994.1	mahe	maheshvara, isoform C [Drosophila melanogaster]	9	945	1.188	0.657389	0.248535	0.182177
NP_608934.1	CG7277	CG7277 [Drosophila melanogaster]	9	477	0.961	0.989614	-0.0573917	0.00453412
NP_726686.1	RpL36	ribosomal protein L36, isoform B [Drosophila melanogaster]	9	115	1.103	0.972015	0.141433	0.0123271
NP_523969.1	Nmt	N-myristoyl transferase [Drosophila melanogaster]	9	472	1.417	0.158424	0.50284	0.80018
NP_647745.1	Non2	novel nucleolar protein 2 [Drosophila melanogaster]	9	244	1.303	0.814775	0.381837	0.0889621
NP_611484.1	CG18067	uncharacterized protein Dmel_CG18067, isoform A [Drosophila melanogaster]	9	245	0.908	0.88608	-0.139236	0.0525269
NP_609183.1	CG12375	uncharacterized protein Dmel_CG12375 [Drosophila melanogaster]	9	292	1.131	0.548619	0.177599	0.260729
NP_649908.1	CG9393	CG9393, isoform A [Drosophila melanogaster]	9	327	0.832	0.796684	-0.265345	0.098714
NP_651873.3	CG1635	CG1635 [Drosophila melanogaster]	9	448	1.144	0.927584	0.194087	0.0326468
NP_001162894.1	Kr-h2	kruppel homolog 2, isoform B [Drosophila melanogaster]	9	276	0.831	0.170044	-0.26708	0.769439
NP_611654.1	Alp2	alkaline phosphatase 2 [Drosophila melanogaster]	9	538	0.483	0.131151	-1.0499	0.882227
NP_001303322.1	vas	vasa, isoform C [Drosophila melanogaster]	9	661	0.535	0.0150097	-0.902389	1.82363
NP_723693.2	Mal-B2	maltase B2, isoform D [Drosophila melanogaster]	9	564	0.632	0.0817284	-0.662004	1.08763
NP_001246792.1	CG45057	uncharacterized protein Dmel_CG45057, isoform B [Drosophila melanogaster]	9	192	2.352	0.116772	1.23389	0.932662
NP_609441.1	CG6415	CG6415 [Drosophila melanogaster]	9	405	0.819	0.504675	-0.288065	0.296988
NP_001259623.1	CG9784	CG9784, isoform C [Drosophila melanogaster]	9	519	0.93	0.988657	-0.104697	0.00495425
NP_001246058.1	Sgt	small glutamine-rich tetratricopeptide containing protein, isoform B [Drosophila melanogaster]	9	331	1.684	0.217335	0.751892	0.662871
NP_001261081.1	CG15099	uncharacterized protein Dmel_CG15099, isoform B [Drosophila melanogaster]	9	2683	1.486	0.519055	0.571434	0.284787
NP_477209.2	T3dh	type III alcohol dehydrogenase [Drosophila melanogaster]	9	464	1.395	0.178362	0.480265	0.748698
NP_728413.1	CG1486	CG1486, isoform B [Drosophila melanogaster]	9	852	1.357	0.0253889	0.440421	1.59536
NP_477075.2	sw	short wing, isoform J [Drosophila melanogaster]	9	663	1.811	0.00296213	0.856787	2.5284
NP_001285417.1	CG7332	CG7332, isoform B [Drosophila melanogaster]	9	560	1.417	0.31741	0.50284	0.498379
NP_724017.1	mdy	midway, isoform C [Drosophila melanogaster]	9	565	0.955	0.994882	-0.0664274	0.00222834
NP_723909.2	Cul3	cullin 3, isoform F [Drosophila melanogaster]	9	934	1.606	0.29074	0.683472	0.536496
NP_572580.1	CG1354	CG1354, isoform A [Drosophila melanogaster]	9	397	1.423	0.0947485	0.508936	1.02343
NP_573179.1	CG4928	CG4928, isoform B [Drosophila melanogaster]	9	538	1.274	0.726852	0.349365	0.138554
NP_524537.1	mRpS22	mitochondrial ribosomal protein S22 [Drosophila melanogaster]	9	393	0.331	0.154056	-1.5951	0.812321
NP_610761.2	garz	gartenzwerg, isoform B [Drosophila melanogaster]	9	1983	2.399	0.0188866	1.26243	1.72385
NP_724022.2	CG13284	uncharacterized protein Dmel_CG13284, isoform B [Drosophila melanogaster]	9	339	0.504	0.232439	-0.988504	0.633692
NP_611771.1	RpL22-like	ribosomal protein L22-like [Drosophila melanogaster]	9	312	13.099	0.0110927	3.71138	1.95496
NP_650279.1	Dic1	dicarboxylate carrier 1, isoform A [Drosophila melanogaster]	9	280	0.736	0.104411	-0.442222	0.981253
NP_611415.2	CG9416	CG9416, isoform A [Drosophila melanogaster]	9	861	2.463	0.0012348	1.30042	2.9084
NP_001261167.1	Rpn8	regulatory particle non-ATPase 8, isoform B [Drosophila melanogaster]	9	358	1.562	0.185204	0.643394	0.73235
NP_650567.1	CG17560	uncharacterized protein Dmel_CG17560 [Drosophila melanogaster]	9	499	0.217	0.00212102	-2.20423	2.67345
NP_611642.2	GM130	golgi matrix protein 130 kD [Drosophila melanogaster]	9	795	1.669	0.0203321	0.738984	1.69182
NP_620115.2	dmGlut	dietary and metabolic glutamate transporter [Drosophila melanogaster]	9	496	0.393	0.00322907	-1.3474	2.49092
NP_001284879.1	rg	rugose, isoform Q [Drosophila melanogaster]	9	3785	1.148	0.79519	0.199123	0.0995289
NP_001247074.1	CG14742	uncharacterized protein Dmel_CG14742 [Drosophila melanogaster]	9	74	2.524	0.226437	1.33571	0.645053
NP_523411.1	Zw	zwischenferment, isoform A [Drosophila melanogaster]	9	524	1.065	0.993577	0.0908534	0.0027983
NP_651683.1	Cyt-c1L	cytochrome c1-like [Drosophila melanogaster]	9	344	4.591	0.00086705	2.19881	3.06196
NP_649899.1	rump	rumpelstiltskin, isoform A [Drosophila melanogaster]	9	632	0.998	1	-0.00288828	6.56767e-10
NP_001260019.1	tutl	turtle, isoform H [Drosophila melanogaster]	9	1533	1.956	0.0123602	0.967906	1.90798
NP_650672.1	DNaseII	deoxyribonuclease II [Drosophila melanogaster]	9	366	1.652	0.142748	0.724214	0.84543
NP_996031.1	Pdxk	pyridoxal kinase [Drosophila melanogaster]	9	304	1.444	0.045818	0.530071	1.33896
NP_612081.1	CG9119	CG9119 [Drosophila melanogaster]	9	322	1.349	0.132477	0.43189	0.877861
NP_649888.1	CG8132	CG8132 [Drosophila melanogaster]	9	283	0.912	0.659835	-0.132894	0.180565
NP_723137.1	eIF-4a	eukaryotic initiation factor 4a, isoform A [Drosophila melanogaster]	9	403	1.252	0.646509	0.324235	0.189426
NP_608787.1	CG3213	CG3213 [Drosophila melanogaster]	9	676	2.24	0.027514	1.1635	1.56045
NP_652608.1	pont	pontin [Drosophila melanogaster]	9	456	1.534	0.125561	0.617298	0.901144
NP_477451.1	Pfrx	6-phosphofructo-2-kinase, isoform G [Drosophila melanogaster]	9	716	1.091	0.845986	0.125651	0.072637
NP_610220.1	CG15908	uncharacterized protein Dmel_CG15908 [Drosophila melanogaster]	9	156	0.415	0.0193952	-1.26882	1.71231
NP_996462.1	Gbeta13F	G protein beta-subunit 13F, isoform C [Drosophila melanogaster]	9	340	0.97	0.999937	-0.0439433	2.75298e-05
NP_599137.1	Rab11	Rab11, isoform A [Drosophila melanogaster]	9	214	0.477	0.0822891	-1.06794	1.08466
NP_609689.3	CG16885	uncharacterized protein Dmel_CG16885 [Drosophila melanogaster]	9	270	3.832	0.0135156	1.9381	1.86917
NP_001260368.1	SCAR	SCAR, isoform D [Drosophila melanogaster]	9	674	1.719	0.00633102	0.78157	2.19853
NP_611370.2	Cyp12b2	Cyp12b2 [Drosophila melanogaster]	9	535	0.729	0.0386895	-0.456009	1.41241
NP_523829.2	l(2)not	lethal (2) neighbor of tid [Drosophila melanogaster]	9	510	1.587	0.00252863	0.666302	2.59712
NP_609967.1	CG10237	uncharacterized protein Dmel_CG10237, isoform B [Drosophila melanogaster]	9	324	1.499	0.184932	0.584	0.732988
NP_523968.1	Arp3	Actin-related protein 3, isoform A [Drosophila melanogaster]	9	418	1.193	0.108933	0.254594	0.962842
NP_651701.1	alph	alphabet, isoform E [Drosophila melanogaster]	9	374	0.999	1	-0.00144342	2.18128e-10
NP_620114.3	bur	burgundy, isoform B [Drosophila melanogaster]	9	683	1.527	0.128606	0.6107	0.890738
NP_477334.2	Mct1	monocarboxylate transporter 1, isoform A [Drosophila melanogaster]	9	626	1.411	0.26613	0.496718	0.574907
NP_001188689.2	RpL27A	ribosomal protein L27A, isoform C [Drosophila melanogaster]	9	149	0.997	1	-0.00433459	6.1306e-08
NP_650586.2	AdSL	adenylosuccinate lyase [Drosophila melanogaster]	9	481	1.057	0.995965	0.0799754	0.00175603
NP_523831.1	Snap29	Synaptosomal-associated protein 29kDa [Drosophila melanogaster]	9	284	1.967	0.0537977	0.975997	1.26924
NP_611694.2	Ugt58Fa	Ugt58Fa, isoform A [Drosophila melanogaster]	9	529	1.753	0.0216236	0.809826	1.66507
NP_788926.2	GSS	glutathione synthetase, isoform H [Drosophila melanogaster]	9	562	1.449	0.496775	0.535058	0.30384
NP_729792.1	Adk1	adenylate kinase 1, isoform B [Drosophila melanogaster]	9	229	1.327	0.113158	0.408168	0.946313
NP_476857.1	Rap1	Rap1 GTPase, isoform A [Drosophila melanogaster]	9	184	1.458	0.103657	0.543991	0.984402
NP_610359.2	Lpin	lipin, isoform A [Drosophila melanogaster]	9	1089	3.163	0.0960885	1.66129	1.01733
NP_524674.1	Hex-C	hexokinase C [Drosophila melanogaster]	9	454	0.571	0.0479163	-0.808437	1.31952
NP_001285907.1	TM9SF4	transmembrane 9 superfamily protein member 4, isoform B [Drosophila melanogaster]	9	630	1.055	0.992674	0.077243	0.00319334
NP_648776.1	CG7739	CG7739 [Drosophila melanogaster]	9	596	0.919	0.927498	-0.121863	0.0326869
NP_001285040.1	SmydA-9	SET and MYND domain containing, arthropod-specific, member 9, isoform B [Drosophila melanogaster]	9	500	1.311	0.188041	0.390668	0.725747
NP_731641.1	COX5A	cytochrome c oxidase subunit 5A, isoform B [Drosophila melanogaster]	9	149	0.45	0.0509743	-1.152	1.29265
NP_001260630.1	CG2493	CG2493, isoform B [Drosophila melanogaster]	9	475	0.922	0.576291	-0.117161	0.239358
NP_732717.1	Sar1	Secretion-associated Ras-related 1, isoform A [Drosophila melanogaster]	9	193	0.364	0.360148	-1.45799	0.44352
NP_608954.1	CG11147	uncharacterized protein Dmel_CG11147, isoform A [Drosophila melanogaster]	9	711	0.821	0.250153	-0.284546	0.601794
NP_001246986.1	COX7A	cytochrome c oxidase subunit 7A, isoform B [Drosophila melanogaster]	9	98	0.526	0.00762025	-0.926865	2.11803
NP_723532.1	CG4908	CG4908, isoform B [Drosophila melanogaster]	9	431	0.962	0.989025	-0.0558912	0.00479275
NP_648657.1	Abp1	actin binding protein 1 [Drosophila melanogaster]	9	531	1.698	0.0046361	0.763836	2.33385
NP_725343.1	mRpL53	mitochondrial ribosomal protein L53 [Drosophila melanogaster]	9	155	1.091	0.874594	0.125651	0.0581936
NP_611142.3	CG5089	CG5089 [Drosophila melanogaster]	9	436	7.882	0.0224132	2.97856	1.6495
NP_727931.1	Nipsnap	nipsnap, isoform A [Drosophila melanogaster]	9	273	0.71	0.612656	-0.494109	0.212783
NP_649579.2	CG1236	CG1236 [Drosophila melanogaster]	9	347	1.437	0.267431	0.52306	0.572788
NP_723454.1	Eaat1	excitatory amino acid transporter 1, isoform B [Drosophila melanogaster]	9	479	1.19	0.466659	0.250962	0.331
NP_725856.1	CG15111	uncharacterized protein Dmel_CG15111, isoform B [Drosophila melanogaster]	9	411	1.479	0.133848	0.564622	0.873388
NP_651140.1	CG4434	CG4434 [Drosophila melanogaster]	9	535	3.021	0.00892003	1.59503	2.04963
NP_650751.3	CG7718	CG7718 [Drosophila melanogaster]	9	494	1.034	0.999807	0.0482362	8.40397e-05
NP_477128.1	Nap1	nucleosome assembly protein 1, isoform A [Drosophila melanogaster]	9	370	0.879	0.867851	-0.186065	0.0615548
NP_649021.1	CG5506	CG5506 [Drosophila melanogaster]	9	180	0.843	0.809959	-0.246395	0.091537
NP_648358.2	Zasp67	Z band alternatively spliced PDZ-motif protein 67, isoform G [Drosophila melanogaster]	9	730	3.813	0.00742296	1.93093	2.12942
NP_647746.1	AhcyL1	adenosylhomocysteinase like 1 [Drosophila melanogaster]	9	521	1.403	0.0151876	0.488515	1.81851
NP_524966.1	EbpIII	ejaculatory bulb protein III, isoform A [Drosophila melanogaster]	9	126	0.698	0.924341	-0.518701	0.0341678
NP_001287641.1	Tim17b	translocase of the inner mitochondrial membrane 17b, isoform B [Drosophila melanogaster]	9	173	1.197	0.65582	0.259423	0.183215
NP_511062.1	Spat	serine pyruvate aminotransferase [Drosophila melanogaster]	9	394	3.08	0.0279202	1.62293	1.55408
NP_729565.2	iPLA2-VIA	calcium-independent phospholipase A2 VIA, isoform B [Drosophila melanogaster]	9	887	1.226	0.661365	0.293959	0.179559
NP_648555.1	CAH2	carbonic anhydrase 2, isoform A [Drosophila melanogaster]	9	335	0.852	0.31657	-0.231075	0.49953
NP_001245917.1	Hrb27C	heterogeneous nuclear ribonucleoprotein at 27C, isoform F [Drosophila melanogaster]	9	421	1.73	0.16429	0.790772	0.784389
NP_524472.1	Rab7	Rab7, isoform A [Drosophila melanogaster]	9	207	0.826	0.929039	-0.275786	0.031966
NP_731299.1	CG31100	uncharacterized protein Dmel_CG31100, isoform A [Drosophila melanogaster]	9	716	1.838	0.0125823	0.878137	1.90024
NP_649051.3	Chmp1	charged multivesicular body protein 1, isoform A [Drosophila melanogaster]	9	203	2.164	0.0593979	1.1137	1.22623
NP_726318.1	roh	reduction of Rh1, isoform A [Drosophila melanogaster]	9	82	0.4	0.132178	-1.32193	0.878842
NP_651974.1	eIF5B	eIF5B, isoform B [Drosophila melanogaster]	9	1144	1.47	0.114754	0.555816	0.940232
NP_572294.2	raptor	raptor, isoform B [Drosophila melanogaster]	9	1621	1.617	0.296082	0.69332	0.528589
NP_001260992.1	row	relative of woc, isoform C [Drosophila melanogaster]	9	1301	1.533	0.637056	0.616358	0.195822
NP_001260087.1	CG4230	CG4230, isoform C [Drosophila melanogaster]	9	386	1.522	0.103512	0.605968	0.985011
NP_609040.1	CG9547	CG9547 [Drosophila melanogaster]	9	419	0.81	0.152692	-0.304006	0.816183
NP_001303467.1	Ktl	Kctd12-like, isoform B [Drosophila melanogaster]	9	228	1.426	0.259939	0.511974	0.585129
NP_726114.1	LBR	lamin B receptor, isoform C [Drosophila melanogaster]	9	741	1.398	0.154314	0.483364	0.811594
NP_524953.1	Spn55B	serpin 55B [Drosophila melanogaster]	9	374	0.471	0.00016792	-1.0862	3.7749
242253868		trypsinogen precursor [Sus scrofa]	9	246	1.466	0.863554	0.551885	0.0637104
NP_001163513.1	CG2082	CG2082, isoform G [Drosophila melanogaster]	9	368	1.561	0.0180949	0.642471	1.74244
NP_611176.1	AsnRS-m	Asparaginyl-tRNA synthetase, mitochondrial [Drosophila melanogaster]	9	460	1.04	0.963097	0.0565835	0.01633
NP_572372.1	CG3040	CG3040 [Drosophila melanogaster]	9	238	0.921	0.996861	-0.118727	0.00136519
NP_001284725.1	RhoGAP1A	Rho GTPase activating protein at 1A, isoform E [Drosophila melanogaster]	9	1404	1.788	0.157449	0.838347	0.802859
NP_648950.1	beg	bad egg [Drosophila melanogaster]	9	379	0.864	0.711725	-0.210897	0.147688
NP_001014703.1	CG33521	uncharacterized protein Dmel_CG33521, isoform A [Drosophila melanogaster]	9	663	5.456	0.00303836	2.44784	2.51736
NP_610779.1	CG8834	CG8834 [Drosophila melanogaster]	9	535	0.195	0.000125255	-2.35845	3.90221
NP_650925.1	CG3822	CG3822 [Drosophila melanogaster]	9	853	1.471	0.00174134	0.556797	2.75912
NP_001285142.1	sicily	severe impairment of CI with lengthened youth, isoform B [Drosophila melanogaster]	9	334	0.741	0.463596	-0.432455	0.33386
NP_524939.1	mRpL4	mitochondrial ribosomal protein L4 [Drosophila melanogaster]	9	296	1.126	0.685083	0.171207	0.164257
NP_610288.1	CG12736	uncharacterized protein Dmel_CG12736 [Drosophila melanogaster]	9	456	1.245	0.372814	0.316146	0.428508
NP_001036360.1	CG31731	uncharacterized protein Dmel_CG31731, isoform B [Drosophila melanogaster]	9	1597	1.267	0.795989	0.341417	0.099093
NP_651968.1	Ref1	RNA and export factor binding protein 1 [Drosophila melanogaster]	9	266	1.836	0.0317881	0.876566	1.49774
NP_610317.1	CG1941	CG1941, isoform A [Drosophila melanogaster]	9	352	0.806	0.669623	-0.311148	0.17417
NP_477288.3	Nup154	nucleoporin 154kD, isoform C [Drosophila melanogaster]	9	1365	0.801	0.53172	-0.320126	0.274317
NP_651356.1	CG10420	uncharacterized protein Dmel_CG10420 [Drosophila melanogaster]	9	429	0.822	0.879835	-0.28279	0.0555987
NP_610939.2	RpS23	ribosomal protein S23, isoform A [Drosophila melanogaster]	9	143	1.36	0.281642	0.443607	0.550302
NP_536784.1	clt	cricklet [Drosophila melanogaster]	9	562	0.856	0.710653	-0.224317	0.148343
NP_001245850.1	Bacc	bacchus, isoform C [Drosophila melanogaster]	9	152	1.61	0.494733	0.687061	0.305629
NP_648327.1	path	pathetic, isoform A [Drosophila melanogaster]	9	471	1.253	0.767098	0.325386	0.115149
NP_001162828.1	Gyf	gigyf, isoform H [Drosophila melanogaster]	9	1574	1.832	0.111059	0.87342	0.954448
NP_729400.1	Cpr66D	cuticular protein 66D [Drosophila melanogaster]	9	270	1.988	0.18278	0.991318	0.738071
NP_523428.1	dod	dodo [Drosophila melanogaster]	9	166	1.37	0.405167	0.454176	0.392366
NP_650142.1	Ect3	Ectoderm-expressed 3 [Drosophila melanogaster]	9	637	1.038	0.998819	0.0538064	0.00051307
NP_729480.1	eIF-4E	eukaryotic initiation factor 4E, isoform C [Drosophila melanogaster]	9	248	1.137	0.979828	0.185232	0.00885023
NP_649128.1	CG9231	CG9231, isoform A [Drosophila melanogaster]	9	125	0.619	0.0855428	-0.691989	1.06782
NP_001303387.1	Nplp2	Neuropeptide-like precursor 2, isoform C [Drosophila melanogaster]	9	119	0.678	0.579766	-0.560643	0.236748
NP_722590.2	Cda5	chitin deacetylase-like 5, isoform B [Drosophila melanogaster]	9	1998	5.067	0.00696797	2.34113	2.15689
NP_476573.1	hook	hook [Drosophila melanogaster]	9	679	1.937	0.0655603	0.953824	1.18336
NP_572178.1	Torsin	torsin, isoform A [Drosophila melanogaster]	9	340	1.083	0.765176	0.115033	0.116238
NP_001260291.1	numb	numb, isoform D [Drosophila melanogaster]	9	556	2.405	0.194648	1.26604	0.710751
NP_650287.3	GILT1	Gamma-interferon-inducible lysosomal thiol reductase 1 [Drosophila melanogaster]	9	250	1.299	0.0997898	0.377401	1.00091
NP_610499.2	CG1814	CG1814, isoform A [Drosophila melanogaster]	9	548	0.921	0.93598	-0.118727	0.0287333
NP_523931.1	Srp54k	signal recognition particle protein 54k [Drosophila melanogaster]	9	508	1.719	0.0137313	0.78157	1.86229
NP_476691.1	Prosalpha3	proteasome alpha3 subunit [Drosophila melanogaster]	9	264	1.172	0.418119	0.228973	0.3787
NP_727284.1	Ppt1	Palmitoyl-protein thioesterase 1, isoform A [Drosophila melanogaster]	9	314	1.006	1	0.00863031	7.21437e-08
NP_524712.1	CG10939	uncharacterized protein Dmel_CG10939 [Drosophila melanogaster]	9	296	0.825	0.765229	-0.277534	0.116209
NP_001285802.1	CG5390	CG5390, isoform B [Drosophila melanogaster]	9	406	3.55	2.9603e-05	1.82782	4.52866
NP_651051.1	Pebp1	Phosphatidylethanolamine-binding protein 1 [Drosophila melanogaster]	9	176	0.083	0.00805826	-3.59074	2.09376
NP_536787.1	cype	cyclope, isoform A [Drosophila melanogaster]	9	77	0.47	0.0250404	-1.08927	1.60136
NP_732780.1	Gclm	Glutamate-cysteine ligase modifier subunit, isoform A [Drosophila melanogaster]	9	285	0.901	0.8649	-0.150401	0.0630339
NP_727921.1	ND-20	NADH dehydrogenase (ubiquinone) 20 kDa subunit, isoform B [Drosophila melanogaster]	9	221	0.619	0.00305605	-0.691989	2.51484
NP_651385.3	CG10562	uncharacterized protein Dmel_CG10562 [Drosophila melanogaster]	9	405	0.447	0.00709709	-1.16165	2.14892
NP_001033803.3	PMCA	plasma membrane calcium ATPase, isoform J [Drosophila melanogaster]	8	1255	1.872	2.04235e-06	0.90458	5.68987
NP_729446.1	Argk	arginine kinase, isoform A [Drosophila melanogaster]	8	562	4.006	3.6793e-05	2.00216	4.43424
NP_001261446.1	sif	still life, isoform J [Drosophila melanogaster]	8	2734	1.787	0.186476	0.83754	0.729378
NP_476772.1	alphaTub84B	alpha-Tubulin at 84B [Drosophila melanogaster]	8	450	2.758	0.0205207	1.46362	1.68781
NP_542445.1	Gapdh2	glyceraldehyde 3 phosphate dehydrogenase 2, isoform A [Drosophila melanogaster]	8	332	1.206	0.434835	0.27023	0.361675
NP_609912.1	CG17597	uncharacterized protein Dmel_CG17597, isoform A [Drosophila melanogaster]	8	407	0.931	0.996552	-0.103147	0.00150017
NP_727985.2	CanA-14F	calcineurin A at 14F, isoform A [Drosophila melanogaster]	8	584	1.613	0.227923	0.689746	0.642213
NP_001261020.1	Asph	aspartyl beta-hydroxylase, isoform L [Drosophila melanogaster]	8	991	1.647	0.060307	0.719841	1.21963
NP_652018.1	Cyp6a17	cytochrome P450-6a17, isoform A [Drosophila melanogaster]	8	501	0.238	0.00469934	-2.07097	2.32796
NP_001034042.1	GstD1	glutathione S transferase D1, isoform B [Drosophila melanogaster]	8	209	0.675	0.806222	-0.567041	0.0935455
NP_524519.1	His2Av	histone H2A variant, isoform A [Drosophila melanogaster]	8	141	0.789	0.947942	-0.341903	0.0232181
NP_611134.1	loopin-1	loopin-1, isoform A [Drosophila melanogaster]	8	526	6.328	0.00426494	2.66175	2.37009
NP_648394.1	S-Lap3	Sperm-Leucylaminopeptidase 3, isoform C [Drosophila melanogaster]	8	535	4.079	0.00348623	2.02822	2.45764
NP_001245568.1	Rab39	Rab39, isoform B [Drosophila melanogaster]	8	218	0.959	0.994419	-0.0603973	0.00243077
NP_609357.2	Npc1a	Niemann-Pick type C-1a, isoform A [Drosophila melanogaster]	8	1287	1.337	0.0319618	0.418999	1.49537
NP_788610.1	mRpL47	mitochondrial ribosomal protein L47 [Drosophila melanogaster]	8	271	0.937	0.970474	-0.093879	0.0130163
[truncated: 3,471 more rows]

## Sheet: Pink1 vs WT
Pink1 (PK) vs WT (F): all proteins with valid abudance ratio and p values
[truncated: 4,974 more rows]
