# Supplementary material for: Loss of Drosophila Clueless differentially affects the mitochondrial proteome compared to loss of Sod2 and Pink1
Source: Front Physiol. 2022 Oct 26;13:1004099. doi: 10.3389/fphys.2022.1004099 (PMC9644064; doi:10.3389/fphys.2022.1004099)
Supplement: Supplementary file 2 [file Table3.XLSX]

## Sheet: clu vs WT as mitomax
Clu (D) vs WT (F) proteins with >1 unique peptide and common with MitoMax
Accession	Proteins	Description	# Unique Peptides	# AAs	Abundance Ratio: (D) / (F)	Abundance Ratio P-Value: (D) / (F)	Abundance Ratio: log2 (D) / (F)	Abundance Ratio P-Value: -log10-(D) / (F)
NP_001033803.3	PMCA	plasma membrane calcium ATPase, isoform J [Drosophila melanogaster]	8	1255	1.786	3.21231e-06	0.836732	5.49318
NP_524445.1	ND-42	NADH dehydrogenase (ubiquinone) 42 kDa subunit, isoform A [Drosophila melanogaster]	32	407	0.199	7.18694e-06	-2.32916	5.14346
NP_572810.1	CG1824	CG1824 [Drosophila melanogaster]	12	761	0.288	3.05953e-05	-1.79586	4.51434
NP_729446.1	Argk	arginine kinase, isoform A [Drosophila melanogaster]	8	562	3.948	3.85604e-05	1.98112	4.41386
NP_787122.1	Ank	ankyrin, isoform B [Drosophila melanogaster]	34	1549	2.677	3.93076e-05	1.42062	4.40552
NP_733183.1	CG31075	uncharacterized protein Dmel_CG31075, isoform A [Drosophila melanogaster]	18	485	4.272	4.04712e-05	2.09491	4.39285
NP_727921.1	ND-20	NADH dehydrogenase (ubiquinone) 20 kDa subunit, isoform B [Drosophila melanogaster]	9	221	0.332	5.18296e-05	-1.59074	4.28542
NP_001261317.1	zormin	zormin, isoform J [Drosophila melanogaster]	30	3664	3.627	6.53084e-05	1.85878	4.18503
NP_476609.1	AspRS	Aspartyl-tRNA synthetase, isoform A [Drosophila melanogaster]	16	531	3.16	6.58074e-05	1.65992	4.18173
NP_536744.2	mtSSB	mitochondrial single stranded DNA-binding protein [Drosophila melanogaster]	7	146	0.434	6.9958e-05	-1.20423	4.15516
NP_001259972.1	NTPase	NTPase, isoform F [Drosophila melanogaster]	24	524	2.158	7.05559e-05	1.10969	4.15147
NP_611341.1	CG10924	uncharacterized protein Dmel_CG10924, isoform A [Drosophila melanogaster]	20	638	3.235	7.06637e-05	1.69377	4.1508
NP_611233.1	UQCR-6.4	Ubiquinol-cytochrome c reductase 6.4 kDa subunit, isoform A [Drosophila melanogaster]	3	57	0.384	8.33561e-05	-1.38082	4.07906
NP_001246231.1	Etf-QO	electron transfer flavoprotein-ubiquinone oxidoreductase, isoform B [Drosophila melanogaster]	28	604	0.628	8.56216e-05	-0.671164	4.06742
NP_001097174.1	Fas3	fasciclin 3, isoform D [Drosophila melanogaster]	4	577	2.133	8.56594e-05	1.09288	4.06722
NP_524423.2	Calx	Na/Ca-exchange protein, isoform A [Drosophila melanogaster]	1	950	2.75	8.78027e-05	1.45943	4.05649
NP_609805.1	CG17904	uncharacterized protein Dmel_CG17904 [Drosophila melanogaster]	2	311	2.624	9.26183e-05	1.39177	4.0333
NP_722715.1	RFeSP	rieske iron-sulfur protein, isoform B [Drosophila melanogaster]	17	230	0.264	0.000126931	-1.92139	3.89643
NP_524065.1	Fbp1	Fat body protein 1, isoform A [Drosophila melanogaster]	1	1029	13.023	0.000132751	3.70299	3.87696
NP_001027048.1	ND-ASHI	NADH dehydrogenase (ubiquinone) ASHI subunit, isoform B [Drosophila melanogaster]	13	175	0.124	0.000143341	-3.01159	3.84363
NP_727668.2	CG32638	uncharacterized protein Dmel_CG32638 [Drosophila melanogaster]	2	159	2.557	0.00016042	1.35445	3.79474
NP_523784.2	Pepck	phosphoenolpyruvate carboxykinase [Drosophila melanogaster]	12	647	6.93	0.000168325	2.79286	3.77385
NP_524661.1	CdsA	CDP diglyceride synthetase, isoform A [Drosophila melanogaster]	8	447	1.839	0.00017275	0.878921	3.76258
NP_001261474.1	ImpL3	Ecdysone-inducible gene L3, isoform B [Drosophila melanogaster]	4	332	3.661	0.000177625	1.87224	3.7505
NP_001188535.1	moody	moody, isoform C [Drosophila melanogaster]	4	633	1.307	0.00017773	0.386259	3.75024
NP_524875.1	arg	arginase [Drosophila melanogaster]	11	351	2.284	0.000182656	1.19156	3.73837
NP_611954.2	ND-19	NADH dehydrogenase (ubiquinone) 19 kDa subunit, isoform A [Drosophila melanogaster]	14	175	0.074	0.000184117	-3.75633	3.73491
NP_732572.1	Atpalpha	Na pump alpha subunit, isoform A [Drosophila melanogaster]	7	1041	1.477	0.00018551	0.56267	3.73163
NP_001036397.2	Slmap	sarcolemma associated protein, isoform D [Drosophila melanogaster]	30	897	4.045	0.000194454	2.01614	3.71118
NP_723955.2	CG42817	uncharacterized protein Dmel_CG42817, isoform A [Drosophila melanogaster]	5	1215	2.351	0.000200267	1.23327	3.69839
NP_001246694.1	Hsp23	heat shock protein 23, isoform B [Drosophila melanogaster]	14	186	7.116	0.000202948	2.83107	3.69262
NP_511102.3	Yp2	yolk protein 2, isoform A [Drosophila melanogaster]	34	442	0.042	0.000209008	-4.57347	3.67984
NP_611805.1	levy	levy, isoform A [Drosophila melanogaster]	7	109	0.142	0.000215627	-2.81604	3.6663
NP_731954.1	UQCR-C1	Ubiquinol-cytochrome c reductase core protein 1, isoform A [Drosophila melanogaster]	41	470	0.247	0.000227223	-2.01742	3.64355
NP_001246441.1	CG8654	CG8654, isoform B [Drosophila melanogaster]	5	502	3.605	0.000243144	1.85	3.61414
NP_651727.1	CG7834	CG7834, isoform A [Drosophila melanogaster]	26	253	0.445	0.000244605	-1.16812	3.61153
NP_572212.1	TrxT	thioredoxin T, isoform A [Drosophila melanogaster]	2	157	6.561	0.000255342	2.71392	3.59288
NP_611133.1	CG7813	CG7813 [Drosophila melanogaster]	18	734	7.094	0.000257184	2.8266	3.58976
NP_001036692.1	ps	pasilla, isoform F [Drosophila melanogaster]	15	572	2.742	0.000269751	1.45523	3.56904
NP_650042.2	CG4706	CG4706 [Drosophila melanogaster]	9	783	7.47	0.000282246	2.90111	3.54937
NP_001285102.1	CG2145	CG2145, isoform B [Drosophila melanogaster]	15	592	4.188	0.000295417	2.06626	3.52956
NP_001245846.1	CG34172	uncharacterized protein Dmel_CG34172, isoform B [Drosophila melanogaster]	2	62	0.036	0.000297258	-4.79586	3.52687
NP_524049.1	Klc	kinesin light chain, isoform A [Drosophila melanogaster]	16	508	2.319	0.000299878	1.2135	3.52306
NP_731489.2	pug	pugilist, isoform B [Drosophila melanogaster]	47	968	2.524	0.000316957	1.33571	3.499
NP_476929.1	Nmdmc	NAD-dependent methylenetetrahydrofolate dehydrogenase, isoform B [Drosophila melanogaster]	11	309	1.832	0.000319551	0.87342	3.49546
NP_524471.2	GluProRS	Glutamyl-prolyl-tRNA synthetase, isoform A [Drosophila melanogaster]	67	1714	7.559	0.000321779	2.9182	3.49244
NP_995940.2	CG33228	uncharacterized protein Dmel_CG33228, isoform B [Drosophila melanogaster]	4	215	0.414	0.000324556	-1.2723	3.48871
NP_649095.2	mRpL21	mitochondrial ribosomal protein L21, isoform A [Drosophila melanogaster]	2	201	0.509	0.000326041	-0.974262	3.48673
NP_001027115.1	Hsp22	heat shock protein 22, isoform A [Drosophila melanogaster]	25	174	52.037	0.000329643	5.70147	3.48196
NP_650333.1	CG9920	CG9920 [Drosophila melanogaster]	9	102	5.982	0.000336486	2.58063	3.47303
NP_001285657.1	ND-51	NADH dehydrogenase (ubiquinone) 51 kDa subunit, isoform B [Drosophila melanogaster]	22	474	0.303	0.000342986	-1.72261	3.46472
NP_652281.1	CG4186	CG4186, isoform A [Drosophila melanogaster]	2	85	0.164	0.000344788	-2.60823	3.46245
NP_001285556.1	Lsp1beta	larval serum protein 1 beta, isoform B [Drosophila melanogaster]	9	789	19.994	0.00035596	4.3215	3.4486
NP_649234.1	ND-39	NADH dehydrogenase (ubiquinone) 39 kDa subunit, isoform A [Drosophila melanogaster]	34	416	0.292	0.000357137	-1.77596	3.44717
NP_648394.1	S-Lap3	Sperm-Leucylaminopeptidase 3, isoform C [Drosophila melanogaster]	8	535	9.439	0.000382972	3.23863	3.41683
NP_648467.1	CG6140	CG6140, isoform A [Drosophila melanogaster]	10	470	4.282	0.000384785	2.09828	3.41478
NP_523795.2	betaTub56D	beta-Tubulin at 56D, isoform B [Drosophila melanogaster]	5	447	4.173	0.000388377	2.06108	3.41075
NP_722774.1	papi	papi, isoform B [Drosophila melanogaster]	18	576	2.016	0.000405185	1.0115	3.39235
NP_001286795.1	kcc	kazachoc, isoform G [Drosophila melanogaster]	2	1077	2.619	0.000409879	1.38902	3.38734
NP_610087.2	CG9257	CG9257 [Drosophila melanogaster]	15	347	2.218	0.000421778	1.14926	3.37492
NP_511148.2	Yp3	yolk protein 3, isoform A [Drosophila melanogaster]	31	420	0.042	0.000440066	-4.57347	3.35648
NP_001285071.1	Yp1	yolk protein 1, isoform B [Drosophila melanogaster]	34	439	0.066	0.000447614	-3.92139	3.3491
NP_651972.1	ND-PDSW	NADH dehydrogenase (ubiquinone) PDSW subunit, isoform A [Drosophila melanogaster]	13	159	0.104	0.000477752	-3.26534	3.3208
NP_723549.1	Mulk	Multi-substrate lipid kinase [Drosophila melanogaster]	15	408	0.567	0.000494389	-0.818579	3.30593
NP_001163753.1	betaTub97EF	beta-Tubulin at 97EF, isoform B [Drosophila melanogaster]	7	457	2.819	0.000503689	1.49518	3.29784
NP_001138111.1	CG42235	uncharacterized protein Dmel_CG42235, isoform B [Drosophila melanogaster]	4	695	3.536	0.000505571	1.82212	3.29622
NP_523473.2	mRpS2	mitochondrial ribosomal protein S2 [Drosophila melanogaster]	5	264	0.452	0.000522919	-1.14561	3.28157
NP_610805.1	CG8778	CG8778 [Drosophila melanogaster]	17	299	0.593	0.000523443	-0.753896	3.28113
NP_001138085.1	CG4836	CG4836, isoform E [Drosophila melanogaster]	4	1224	18.133	0.000525308	4.18055	3.27959
NP_524351.1	mRpL11	mitochondrial ribosomal protein L11 [Drosophila melanogaster]	7	196	0.514	0.000541186	-0.96016	3.26665
NP_727290.1	Moe	moesin, isoform B [Drosophila melanogaster]	42	649	0.629	0.000543787	-0.668868	3.26457
NP_650648.3	Pxt	Peroxinectin-like [Drosophila melanogaster]	31	809	0.295	0.000565406	-1.76121	3.24764
NP_651049.3	AP-2mu	adaptor protein complex 2, mu subunit, isoform B [Drosophila melanogaster]	12	437	2.629	0.000578518	1.39451	3.23768
NP_727905.1	sun	stunted, isoform B [Drosophila melanogaster]	2	57	0.287	0.000584372	-1.80088	3.23331
NP_651683.1	Cyt-c1L	cytochrome c1-like [Drosophila melanogaster]	9	344	5.226	0.000587473	2.38571	3.23101
NP_001189251.1	CG42668	uncharacterized protein Dmel_CG42668, isoform K [Drosophila melanogaster]	18	956	1.768	0.000599226	0.822118	3.22241
NP_001188515.1	PMCA	plasma membrane calcium ATPase, isoform P [Drosophila melanogaster]	4	1194	3.303	0.00061166	1.72378	3.21349
NP_650774.1	NP15.6	NP15.6 [Drosophila melanogaster]	7	150	0.209	0.000629884	-2.25843	3.20074
NP_650760.1	CG14291	uncharacterized protein Dmel_CG14291 [Drosophila melanogaster]	8	524	3.426	0.000636212	1.77653	3.1964
NP_001284805.1	ND-B14.5A	NADH dehydrogenase (ubiquinone) B14.5 A subunit, isoform B [Drosophila melanogaster]	14	103	0.179	0.000646649	-2.48197	3.18933
NP_001285170.1	mRpL49	mitochondrial ribosomal protein L49, isoform B [Drosophila melanogaster]	5	179	0.453	0.000650092	-1.14242	3.18702
NP_001260426.1	Vha68-1	vacuolar H[+] ATPase 68kD subunit 1, isoform B [Drosophila melanogaster]	17	614	2.486	0.000657171	1.31383	3.18232
NP_001245921.1	CG18304	uncharacterized protein Dmel_CG18304, isoform B [Drosophila melanogaster]	32	1819	4.609	0.00066248	2.20445	3.17883
NP_476812.1	PPO1	prophenoloxidase 1 [Drosophila melanogaster]	36	690	4.83	0.000664385	2.27202	3.17758
NP_610854.1	CG4679	CG4679 [Drosophila melanogaster]	18	652	0.271	0.000688301	-1.88364	3.16222
NP_569875.2	CG3699	CG3699 [Drosophila melanogaster]	15	251	2.605	0.000695756	1.38128	3.15754
NP_001245581.1	Nrg	neuroglian, isoform G [Drosophila melanogaster]	57	1309	2.331	0.00072509	1.22095	3.13961
NP_476768.1	trp	transient receptor potential, isoform A [Drosophila melanogaster]	41	1275	4.621	0.000725101	2.20821	3.1396
NP_523828.1	mRpL43	mitochondrial ribosomal protein L43 [Drosophila melanogaster]	11	192	0.416	0.000733462	-1.26534	3.13462
NP_652101.2	CG17508	uncharacterized protein Dmel_CG17508, isoform A [Drosophila melanogaster]	2	321	0.489	0.000746274	-1.03209	3.1271
NP_727901.1	Chc	clathrin heavy chain, isoform B [Drosophila melanogaster]	47	1678	3.936	0.000748274	1.97673	3.12594
NP_608578.1	CG5080	CG5080, isoform B [Drosophila melanogaster]	20	554	2.046	0.000757867	1.03281	3.12041
NP_599138.3	Dhod	dihydroorotate dehydrogenase, isoform D [Drosophila melanogaster]	23	405	0.568	0.000767014	-0.816037	3.1152
NP_649086.2	CG6812	CG6812 [Drosophila melanogaster]	15	327	3.058	0.00079011	1.61259	3.10231
NP_477002.1	ND-ACP	NADH dehydrogenase (ubiquinone) acyl carrier protein, isoform B [Drosophila melanogaster]	5	143	0.433	0.00079613	-1.20756	3.09902
NP_523509.2	Pvr	PDGF- and VEGF-receptor related, isoform A [Drosophila melanogaster]	1	1509	4.261	0.000835048	2.09119	3.07829
NP_001261019.1	Strn-Mlck	Stretchin-Mlck, isoform U [Drosophila melanogaster]	41	8255	3.952	0.000850802	1.98258	3.07017
NP_610892.1	S-Lap5	Sperm-Leucylaminopeptidase 5 [Drosophila melanogaster]	5	549	6.606	0.000861102	2.72378	3.06495
NP_723847.1	mRpS23	mitochondrial ribosomal protein S23 [Drosophila melanogaster]	8	189	0.474	0.000866819	-1.07704	3.06207
NP_524415.1	TFAM	mitochondrial transcription factor A, isoform A [Drosophila melanogaster]	30	257	0.362	0.000872294	-1.46594	3.05934
NP_648103.1	CG8602	CG8602, isoform A [Drosophila melanogaster]	6	478	1.918	0.000887073	0.939603	3.05204
NP_001259397.1	ATPsyndelta	ATP synthase, delta subunit, isoform B [Drosophila melanogaster]	15	157	0.28	0.00090644	-1.8365	3.04266
NP_610575.1	Ndg	Nidogen/entactin, isoform A [Drosophila melanogaster]	5	1350	2.901	0.000908964	1.53655	3.04145
NP_001246637.1	Cyt-c1	cytochrome c1, isoform B [Drosophila melanogaster]	20	307	0.227	0.000918929	-2.13924	3.03672
NP_725882.1	SdhA	succinate dehydrogenase, subunit A (flavoprotein), isoform C [Drosophila melanogaster]	41	661	0.526	0.000920402	-0.926865	3.03602
NP_001285037.1	CG9034	CG9034, isoform B [Drosophila melanogaster]	3	77	0.229	0.000923298	-2.12658	3.03466
NP_651447.2	CG42235	uncharacterized protein Dmel_CG42235, isoform E [Drosophila melanogaster]	2	691	3.947	0.000931246	1.98076	3.03094
NP_524174.1	fln	flightin, isoform A [Drosophila melanogaster]	19	182	4.156	0.000944783	2.0552	3.02467
NP_610213.1	tomboy40	tomboy40 [Drosophila melanogaster]	4	340	3.227	0.000964856	1.69019	3.01554
NP_001260612.1	COX4	cytochrome c oxidase subunit 4, isoform C [Drosophila melanogaster]	16	182	0.165	0.000966151	-2.59946	3.01496
NP_477354.1	Hop	Hsp70/Hsp90 organizing protein [Drosophila melanogaster]	23	490	2.522	0.000977907	1.33457	3.0097
NP_730611.1	AcCoAS	acetyl coenzyme A synthase, isoform A [Drosophila melanogaster]	16	670	2.189	0.000981007	1.13027	3.00833
NP_001260509.1	Cyt-c-d	cytochrome c distal, isoform B [Drosophila melanogaster]	4	105	4.881	0.00101059	2.28718	2.99542
NP_001188694.1	Msp300	Muscle-specific protein 300 kDa, isoform D [Drosophila melanogaster]	105	12345	2.764	0.00103263	1.46676	2.98606
NP_001260364.1	Porin2	Porin2, isoform B [Drosophila melanogaster]	13	293	5.372	0.00103384	2.42546	2.98555
NP_525119.1	mRpS17	mitochondrial ribosomal protein S17 [Drosophila melanogaster]	8	155	0.433	0.00103683	-1.20756	2.98429
NP_001260063.1	mRpL28	mitochondrial ribosomal protein L28, isoform B [Drosophila melanogaster]	14	302	0.341	0.0010394	-1.55216	2.98322
NP_523893.1	mRpS35	mitochondrial ribosomal protein S35 [Drosophila melanogaster]	10	326	0.331	0.00105004	-1.5951	2.9788
NP_727255.1	ND-75	NADH dehydrogenase (ubiquinone) 75 kDa subunit, isoform B [Drosophila melanogaster]	62	731	0.335	0.0010603	-1.57777	2.97457
NP_660192.1	CG4098	CG4098 [Drosophila melanogaster]	3	307	5.335	0.00107694	2.41549	2.96781
NP_996248.1	Atpalpha	Na pump alpha subunit, isoform G [Drosophila melanogaster]	3	1002	1.963	0.0010909	0.97306	2.96222
NP_001260339.1	mRpS7	mitochondrial ribosomal protein S7, isoform B [Drosophila melanogaster]	12	218	0.39	0.00115285	-1.35845	2.93823
NP_524306.3	mRpL37	mitochondrial ribosomal protein L37 [Drosophila melanogaster]	17	408	0.514	0.00115363	-0.96016	2.93793
NP_524705.1	slmo	slowmo, isoform B [Drosophila melanogaster]	2	215	3.333	0.00116121	1.73682	2.93509
NP_648905.1	UQCR-C2	Ubiquinol-cytochrome c reductase core protein 2, isoform A [Drosophila melanogaster]	38	440	0.3	0.00116893	-1.73697	2.93221
NP_001285378.1	ND-24	NADH dehydrogenase (ubiquinone) 24 kDa subunit, isoform B [Drosophila melanogaster]	26	242	0.294	0.00117586	-1.76611	2.92965
NP_729966.1	CG7768	CG7768, isoform A [Drosophila melanogaster]	6	164	5.806	0.00117624	2.53754	2.92951
NP_001245922.1	uif	uninflatable, isoform D [Drosophila melanogaster]	32	3589	4.753	0.00122108	2.24884	2.91326
NP_726243.1	blw	bellwether [Drosophila melanogaster]	71	552	0.406	0.00131045	-1.30045	2.88258
NP_650693.1	mTerf5	mitochondrial transcription termination factor 5 [Drosophila melanogaster]	6	560	0.576	0.00134398	-0.795859	2.87161
NP_725824.1	CG15093	uncharacterized protein Dmel_CG15093, isoform A [Drosophila melanogaster]	8	324	0.537	0.00140096	-0.897006	2.85358
NP_573110.1	UQCR-14	Ubiquinol-cytochrome c reductase 14 kDa subunit [Drosophila melanogaster]	14	111	0.18	0.00141794	-2.47393	2.84834
NP_477258.1	Idgf1	imaginal disc growth factor 1 [Drosophila melanogaster]	10	439	2.004	0.00143865	1.00288	2.84205
NP_524402.1	ATPsynD	ATP synthase, subunit D, isoform A [Drosophila melanogaster]	26	178	0.267	0.00147729	-1.90509	2.83053
NP_524719.1	ND-23	NADH dehydrogenase (ubiquinone) 23 kDa subunit [Drosophila melanogaster]	18	217	0.173	0.0014968	-2.53116	2.82484
NP_611134.1	loopin-1	loopin-1, isoform A [Drosophila melanogaster]	8	526	9.962	0.00154316	3.31644	2.81159
NP_001246631.1	axo	axotactin, isoform C [Drosophila melanogaster]	1	2179	5.73	0.00157168	2.51854	2.80364
NP_723086.1	CG31648	uncharacterized protein Dmel_CG31648 [Drosophila melanogaster]	3	241	0.256	0.00160818	-1.96578	2.79366
NP_611468.1	CG9090	CG9090, isoform A [Drosophila melanogaster]	20	374	0.242	0.00163804	-2.04692	2.78568
NP_524474.1	Hsp68	heat shock protein 68 [Drosophila melanogaster]	20	635	9.026	0.00165184	3.17409	2.78203
NP_511087.1	Cp36	chorion protein 36 [Drosophila melanogaster]	12	284	0.158	0.00168428	-2.662	2.77359
NP_524284.1	mRpL19	mitochondrial ribosomal protein L19 [Drosophila melanogaster]	18	306	0.513	0.00168444	-0.962969	2.77354
NP_648068.1	CG10063	uncharacterized protein Dmel_CG10063 [Drosophila melanogaster]	8	212	6.413	0.00170415	2.681	2.76849
NP_524356.1	Hsc70-4	heat shock protein cognate 4, isoform A [Drosophila melanogaster]	56	651	1.859	0.0017112	0.894527	2.7667
NP_524290.2	betaTub85D	beta-Tubulin at 85D [Drosophila melanogaster]	6	446	4.15	0.00174096	2.05311	2.75921
NP_001246890.1	nrm	neuromusculin, isoform E [Drosophila melanogaster]	17	2192	2.287	0.00174521	1.19346	2.75815
NP_001097287.1	Dyb	dystrobrevin, isoform F [Drosophila melanogaster]	8	816	3.048	0.00175639	1.60786	2.75538
NP_723104.2	Hsp60C	heat shock protein 60C, isoform A [Drosophila melanogaster]	26	576	6.297	0.00177107	2.65466	2.75177
NP_001246674.1	rhea	rhea, isoform B [Drosophila melanogaster]	61	2836	2.345	0.00178188	1.22959	2.74912
NP_609595.1	Vha68-3	vacuolar H[+] ATPase 68kD subunit 3 [Drosophila melanogaster]	4	743	2.12	0.00183962	1.08406	2.73527
NP_001137754.1	prom	prominin, isoform D [Drosophila melanogaster]	33	1235	3.108	0.00184277	1.63599	2.73453
NP_723346.2	Bsg	basigin, isoform G [Drosophila melanogaster]	9	648	2.064	0.0018796	1.04544	2.72594
NP_001259186.1	mRpL14	mitochondrial ribosomal protein L14, isoform B [Drosophila melanogaster]	6	161	0.481	0.00189858	-1.05589	2.72157
NP_648985.1	UQCR-Q	Ubiquinol-cytochrome c reductase ubiquinone-binding protein, isoform A [Drosophila melanogaster]	6	89	0.106	0.00193293	-3.23786	2.71378
NP_001286937.1	Src64B	Src oncogene at 64B, isoform K [Drosophila melanogaster]	11	553	2.072	0.00197138	1.05102	2.70523
NP_001027038.3	trol	terribly reduced optic lobes, isoform AT [Drosophila melanogaster]	86	4479	1.787	0.00203789	0.83754	2.69082
NP_001261287.1	alpha-Spec	alpha spectrin, isoform C [Drosophila melanogaster]	240	2447	2.281	0.00206808	1.18967	2.68443
NP_726631.1	ATPsynbeta	ATP synthase, beta subunit, isoform A [Drosophila melanogaster]	45	505	0.514	0.0020693	-0.96016	2.68418
NP_788610.1	mRpL47	mitochondrial ribosomal protein L47 [Drosophila melanogaster]	8	271	0.394	0.00207354	-1.34373	2.68329
NP_727091.1	kdn	knockdown, isoform B [Drosophila melanogaster]	30	522	0.486	0.00216335	-1.04097	2.66487
NP_001246804.1	CG9674	CG9674, isoform F [Drosophila melanogaster]	65	2115	1.611	0.00216652	0.687956	2.66424
NP_001286040.1	Acp36DE	accessory gland protein 36DE, isoform B [Drosophila melanogaster]	55	912	4.874	0.00223181	2.28511	2.65134
NP_001287274.1	CG45076	uncharacterized protein Dmel_CG45076, isoform E [Drosophila melanogaster]	3	343	3.224	0.00224179	1.68885	2.64941
NP_511153.1	mRpS25	mitochondrial ribosomal protein S25 [Drosophila melanogaster]	5	167	0.313	0.00232717	-1.67577	2.63317
NP_729394.1	S-Lap2	Sperm-Leucylaminopeptidase 2 [Drosophila melanogaster]	4	552	4.728	0.00236449	2.24123	2.62626
NP_609089.1	CG10399	uncharacterized protein Dmel_CG10399, isoform A [Drosophila melanogaster]	6	323	0.427	0.00238793	-1.22769	2.62198
NP_648950.1	beg	bad egg [Drosophila melanogaster]	9	379	0.395	0.0024038	-1.34008	2.6191
NP_001246623.1	mRpS6	mitochondrial ribosomal protein S6, isoform B [Drosophila melanogaster]	7	147	0.404	0.00244799	-1.30757	2.61119
NP_725790.2	CG5174	CG5174, isoform M [Drosophila melanogaster]	2	202	1.708	0.00246861	0.772308	2.60755
NP_001162875.1	Rtnl1	Reticulon-like1, isoform H [Drosophila melanogaster]	24	607	4.12	0.00247188	2.04264	2.60697
NP_611132.1	S-Lap8	Sperm-Leucylaminopeptidase 8 [Drosophila melanogaster]	5	534	6.362	0.0024948	2.66948	2.60296
NP_001261154.1	Eglp4	entomoglyceroporin 4, isoform F [Drosophila melanogaster]	4	297	1.896	0.00250674	0.922959	2.60089
NP_001097814.1	Fas1	fasciclin 1, isoform D [Drosophila melanogaster]	42	662	1.704	0.00252652	0.768925	2.59748
NP_651926.1	ND-49	NADH dehydrogenase (ubiquinone) 49 kDa subunit, isoform A [Drosophila melanogaster]	24	468	0.319	0.00253638	-1.64837	2.59579
NP_649090.1	CG10424	uncharacterized protein Dmel_CG10424 [Drosophila melanogaster]	2	300	2.063	0.00256557	1.04474	2.59082
NP_476666.1	arm	armadillo, isoform A [Drosophila melanogaster]	12	843	2.557	0.00256963	1.35445	2.59013
NP_733237.1	mino	minotaur, isoform C [Drosophila melanogaster]	17	786	0.687	0.00264501	-0.541618	2.57757
NP_724248.1	mRpS18B	mitochondrial ribosomal protein S18B, isoform B [Drosophila melanogaster]	5	204	0.552	0.00265169	-0.85726	2.57648
NP_511072.2	2020-12-01	defective chorion 1, isoform A [Drosophila melanogaster]	2	1590	0.311	0.00268814	-1.68501	2.57055
NP_001259083.1	CaMKII	Calcium/calmodulin-dependent protein kinase II, isoform L [Drosophila melanogaster]	3	522	3.989	0.00272985	1.99603	2.56386
NP_651985.1	CG14630	uncharacterized protein Dmel_CG14630 [Drosophila melanogaster]	6	406	0.405	0.00278662	-1.30401	2.55492
NP_476934.2	Myo61F	myosin 61F, isoform D [Drosophila melanogaster]	61	1052	0.337	0.00279854	-1.56918	2.55307
NP_536787.1	cype	cyclope, isoform A [Drosophila melanogaster]	9	77	0.287	0.00280448	-1.80088	2.55215
NP_648244.1	S-Lap1	Sperm-Leucylaminopeptidase 1 [Drosophila melanogaster]	4	555	6.569	0.00282936	2.71567	2.54831
NP_722765.2	AIF	apoptosis inducing factor, isoform B [Drosophila melanogaster]	38	739	0.569	0.00283334	-0.813499	2.5477
NP_647924.2	CG18418	uncharacterized protein Dmel_CG18418 [Drosophila melanogaster]	2	311	4.457	0.00285511	2.15607	2.54438
NP_731505.1	fau	fau [Drosophila melanogaster]	7	131	4.299	0.00287423	2.104	2.54148
NP_727464.1	CG1637	CG1637, isoform A [Drosophila melanogaster]	1	453	0.321	0.00287454	-1.63935	2.54143
NP_001259660.1	beta-Spec	beta spectrin, isoform B [Drosophila melanogaster]	6	2308	3.322	0.00290681	1.73205	2.53658
NP_476819.2	AP-2alpha	adaptor protein complex 2, alpha subunit, isoform A [Drosophila melanogaster]	33	940	2.222	0.00295652	1.15186	2.52922
NP_731641.1	COX5A	cytochrome c oxidase subunit 5A, isoform B [Drosophila melanogaster]	9	149	0.211	0.00299678	-2.24469	2.52334
NP_650632.1	P5cr-2	Pyrroline-5-carboxylate reductase-like 2, isoform A [Drosophila melanogaster]	6	273	3.13	0.0030528	1.64616	2.5153
NP_608533.1	CG2794	CG2794 [Drosophila melanogaster]	11	700	0.486	0.00305713	-1.04097	2.51469
NP_001036676.1	Cdep	Chondrocyte-derived ezrin-like domain containing protein, isoform E [Drosophila melanogaster]	6	1167	3.086	0.00311296	1.62574	2.50683
NP_650501.1	CG4546	CG4546 [Drosophila melanogaster]	11	457	5.101	0.00311508	2.35078	2.50653
NP_730535.1	Psn	presenilin, isoform B [Drosophila melanogaster]	6	527	2.055	0.00311523	1.03914	2.50651
NP_477307.1	CRMP	collapsin response mediator protein, isoform A [Drosophila melanogaster]	3	589	3.05	0.00312691	1.60881	2.50489
NP_733266.1	CG11876	uncharacterized protein Dmel_CG11876, isoform B [Drosophila melanogaster]	3	273	0.263	0.00313096	-1.92687	2.50432
NP_001260561.1	AsnRS	Asparaginyl-tRNA synthetase, isoform B [Drosophila melanogaster]	19	558	2.42	0.00318561	1.27501	2.49681
NP_001259282.1	CG34417	uncharacterized protein Dmel_CG34417, isoform T [Drosophila melanogaster]	89	5182	3.006	0.00329138	1.58785	2.48262
NP_649970.1	CG11722	uncharacterized protein Dmel_CG11722 [Drosophila melanogaster]	15	203	0.53	0.00331334	-0.915936	2.47973
NP_001262024.1	CG3961	CG3961, isoform E [Drosophila melanogaster]	22	666	1.756	0.00332452	0.812293	2.47827
NP_001262361.1	CG2698	CG2698, isoform H [Drosophila melanogaster]	2	865	2.86	0.00334944	1.51602	2.47503
NP_611002.3	Cyp6a20	Cyp6a20 [Drosophila melanogaster]	16	501	0.553	0.00336465	-0.854649	2.47306
NP_608929.1	CG7382	CG7382 [Drosophila melanogaster]	12	236	0.789	0.00343909	-0.341903	2.46356
NP_001261404.1	Rop	Ras opposite, isoform B [Drosophila melanogaster]	27	597	1.567	0.00345014	0.648005	2.46216
NP_651408.1	Ssadh	succinic semialdehyde dehydrogenase, isoform A [Drosophila melanogaster]	18	509	0.566	0.00346781	-0.821126	2.45994
NP_732020.2	CG5044	CG5044, isoform B [Drosophila melanogaster]	8	386	0.705	0.0034827	-0.504305	2.45808
NP_620115.2	dmGlut	dietary and metabolic glutamate transporter [Drosophila melanogaster]	9	496	0.399	0.0034941	-1.32554	2.45666
NP_649399.1	ND-B14.5AL	NADH dehydrogenase (ubiquinone) B14.5 A subunit-like [Drosophila melanogaster]	5	145	4.913	0.00352141	2.2966	2.45328
NP_610220.1	CG15908	uncharacterized protein Dmel_CG15908 [Drosophila melanogaster]	9	156	0.273	0.00353594	-1.87303	2.45149
NP_651003.1	Cchl	cytochrome c heme lyase, isoform A [Drosophila melanogaster]	17	281	2.121	0.00354774	1.08474	2.45005
NP_647775.1	ND-30	NADH dehydrogenase (ubiquinone) 30 kDa subunit [Drosophila melanogaster]	24	265	0.225	0.00360155	-2.152	2.44351
NP_524063.1	Hsc70-1	heat shock protein cognate 1, isoform A [Drosophila melanogaster]	17	641	2.818	0.00362417	1.49467	2.44079
NP_726881.1	Rala	Ras-like protein A, isoform B [Drosophila melanogaster]	3	197	0.554	0.0037162	-0.852042	2.4299
NP_730270.1	CG32174	uncharacterized protein Dmel_CG32174, isoform B [Drosophila melanogaster]	4	268	0.607	0.00372412	-0.720232	2.42898
NP_001162767.1	shi	shibire, isoform L [Drosophila melanogaster]	4	883	2.743	0.00372764	1.45575	2.42857
NP_001246986.1	COX7A	cytochrome c oxidase subunit 7A, isoform B [Drosophila melanogaster]	9	98	0.471	0.00376814	-1.0862	2.42387
NP_001287638.1	ND-AGGG	NADH dehydrogenase (ubiquinone) AGGG subunit, isoform B [Drosophila melanogaster]	4	94	0.267	0.00382403	-1.90509	2.41748
NP_477377.1	CG4882	CG4882, isoform A [Drosophila melanogaster]	21	406	0.455	0.00386079	-1.13606	2.41332
NP_730790.2	Gel	gelsolin, isoform D [Drosophila melanogaster]	19	798	1.981	0.0039056	0.986229	2.40831
NP_608858.3	Clect27	C-type lectin 27kD, isoform A [Drosophila melanogaster]	10	231	2.455	0.00408367	1.29572	2.38895
NP_477401.2	Sbf	SET domain binding factor, isoform A [Drosophila melanogaster]	5	1993	3.387	0.00412448	1.76001	2.38463
NP_610889.1	CG42807	uncharacterized protein Dmel_CG42807, isoform A [Drosophila melanogaster]	5	278	5.554	0.00412838	2.47353	2.38422
NP_611691.1	bonsai	bonsai [Drosophila melanogaster]	8	280	0.459	0.00422189	-1.12343	2.37449
NP_477464.1	Syt4	synaptotagmin 4 [Drosophila melanogaster]	4	474	2.975	0.00425861	1.57289	2.37073
NP_001285787.1	CG13126	uncharacterized protein Dmel_CG13126, isoform B [Drosophila melanogaster]	8	463	0.404	0.00426215	-1.30757	2.37037
NP_727519.1	dlg1	discs large 1, isoform F [Drosophila melanogaster]	17	816	4.151	0.00426621	2.05346	2.36996
NP_573063.1	CG11679	uncharacterized protein Dmel_CG11679 [Drosophila melanogaster]	7	420	0.628	0.00431661	-0.671164	2.36486
NP_001259986.1	FASN2	fatty acid synthase 2, isoform B [Drosophila melanogaster]	40	2410	2.819	0.00447417	1.49518	2.34929
NP_523476.1	mRpL24	mitochondrial ribosomal protein L24 [Drosophila melanogaster]	21	247	0.534	0.00448395	-0.905088	2.34834
NP_001097744.1	Ugt86Dd	Ugt86Dd [Drosophila melanogaster]	14	517	0.292	0.00455774	-1.77596	2.34125
NP_001246118.1	Dap160	dynamin associated protein 160, isoform D [Drosophila melanogaster]	23	1190	2.474	0.00458976	1.30685	2.33821
NP_648092.1	mRpL50	mitochondrial ribosomal protein L50 [Drosophila melanogaster]	7	189	0.483	0.00472049	-1.0499	2.32601
NP_001284813.1	Vinc	vinculin, isoform B [Drosophila melanogaster]	48	961	1.901	0.004729	0.926759	2.32523
NP_610333.1	CG8728	CG8728 [Drosophila melanogaster]	14	556	0.49	0.00472926	-1.02915	2.32521
NP_001260155.1	Liprin-alpha	Liprin-alpha, isoform E [Drosophila melanogaster]	17	1214	2.399	0.00473556	1.26243	2.32463
NP_524134.1	mRpS26	mitochondrial ribosomal protein S26 [Drosophila melanogaster]	8	225	0.365	0.00475513	-1.45403	2.32284
NP_572886.2	GstT4	glutathione S transferase T4 [Drosophila melanogaster]	10	237	0.65	0.00478213	-0.621488	2.32038
NP_001162765.1	MSBP	membrane steroid binding protein, isoform B [Drosophila melanogaster]	22	248	1.403	0.00483444	0.488515	2.31565
NP_788887.1	CG10962	uncharacterized protein Dmel_CG10962 [Drosophila melanogaster]	3	249	1.937	0.00483861	0.953824	2.31528
NP_726111.1	Tango11	transport and golgi organization 11, isoform A [Drosophila melanogaster]	7	277	3.099	0.00484619	1.6318	2.3146
NP_649541.1	mRpL44	mitochondrial ribosomal protein L44 [Drosophila melanogaster]	11	321	0.311	0.00488973	-1.68501	2.31071
NP_610299.2	Vps13	vacuolar protein sorting 13, isoform A [Drosophila melanogaster]	62	3321	2.028	0.0049137	1.02006	2.30859
NP_724841.1	PCB	pyruvate carboxylase, isoform I [Drosophila melanogaster]	89	1197	1.944	0.00499978	0.959028	2.30105
NP_651072.1	mRpL45	mitochondrial ribosomal protein L45 [Drosophila melanogaster]	15	361	0.558	0.00503348	-0.841663	2.29813
NP_611382.1	MetRS	Methionyl-tRNA synthetase [Drosophila melanogaster]	20	1022	2.484	0.00507585	1.31267	2.29449
NP_001137770.1	ND-B17.2	NADH dehydrogenase (ubiquinone) B17.2 subunit, isoform B [Drosophila melanogaster]	13	142	0.146	0.00508026	-2.77596	2.29411
NP_001245490.1	tko	technical knockout, isoform C [Drosophila melanogaster]	4	154	0.579	0.00509941	-0.788365	2.29248
NP_609215.3	CG7627	CG7627, isoform A [Drosophila melanogaster]	20	1355	0.694	0.00516418	-0.526992	2.287
NP_651668.1	CG11876	uncharacterized protein Dmel_CG11876, isoform D [Drosophila melanogaster]	13	365	0.495	0.00522945	-1.0145	2.28154
NP_727251.1	Trxr-1	thioredoxin reductase-1, isoform B [Drosophila melanogaster]	19	596	0.803	0.0052434	-0.316528	2.28039
NP_511166.2	mRpL3	mitochondrial ribosomal protein L3 [Drosophila melanogaster]	15	362	0.542	0.00524896	-0.883635	2.27993
NP_730568.1	tzn	tenzing norgay, isoform C [Drosophila melanogaster]	13	348	0.494	0.00528692	-1.01742	2.2768
NP_729406.1	Prm	paramyosin, isoform C [Drosophila melanogaster]	1	640	2.005	0.00533581	1.0036	2.2728
NP_524925.1	Hsp60B	heat shock protein 60B [Drosophila melanogaster]	13	648	7.056	0.00534396	2.81885	2.27214
NP_733270.1	Vha100-1	vacuolar H[+] ATPase 100kD subunit 1, isoform C [Drosophila melanogaster]	4	855	1.817	0.00540676	0.861558	2.26706
NP_727108.1	l(1)G0255	lethal (1) G0255, isoform B [Drosophila melanogaster]	26	467	0.505	0.00543487	-0.985645	2.26481
NP_731600.1	Jupiter	jupiter, isoform B [Drosophila melanogaster]	4	185	4.383	0.00559405	2.13192	2.25227
NP_001259991.1	ND-B14.5B	NADH dehydrogenase (ubiquinone) B14.5 B subunit, isoform B [Drosophila melanogaster]	8	116	0.511	0.00561167	-0.968605	2.25091
NP_001027395.1	Spn43Ab	serpin 43Ab [Drosophila melanogaster]	25	393	2.062	0.00561792	1.04404	2.25042
NP_648836.2	ATPsynbetaL	ATP synthase, beta subunit-like [Drosophila melanogaster]	17	622	4.279	0.00564417	2.09727	2.2484
NP_647661.1	mRpL46	mitochondrial ribosomal protein L46 [Drosophila melanogaster]	13	258	0.206	0.00571616	-2.27928	2.2429
NP_524606.1	mRpL32	mitochondrial ribosomal protein L32 [Drosophila melanogaster]	5	195	0.288	0.00574339	-1.79586	2.24083
NP_723927.2	ND-B17	NADH dehydrogenase (ubiquinone) B17 subunit, isoform C [Drosophila melanogaster]	15	167	0.251	0.00580341	-1.99424	2.23632
NP_001036353.1	ATPsynG	ATP synthase, isoform B [Drosophila melanogaster]	8	99	0.461	0.00590698	-1.11716	2.22863
NP_730954.2	CRMP	collapsin response mediator protein, isoform E [Drosophila melanogaster]	1	594	2.925	0.00598936	1.54844	2.22262
NP_001285018.1	CG1440	CG1440, isoform D [Drosophila melanogaster]	14	551	1.429	0.00601356	0.515006	2.22087
NP_001245815.1	ND-15	NADH dehydrogenase (ubiquinone) 15 kDa subunit, isoform F [Drosophila melanogaster]	3	101	0.264	0.00601531	-1.92139	2.22074
NP_476772.1	alphaTub84B	alpha-Tubulin at 84B [Drosophila melanogaster]	8	450	3.849	0.00602894	1.94448	2.21976
NP_001097706.1	CG17816	uncharacterized protein Dmel_CG17816, isoform G [Drosophila melanogaster]	4	882	3.799	0.00604593	1.92562	2.21854
NP_609183.1	CG12375	uncharacterized protein Dmel_CG12375 [Drosophila melanogaster]	9	292	1.665	0.0060847	0.735522	2.21576
NP_996249.1	Atpalpha	Na pump alpha subunit, isoform F [Drosophila melanogaster]	1	1002	2.088	0.00613256	1.06212	2.21236
NP_001259946.1	Drp1	dynamin related protein 1, isoform B [Drosophila melanogaster]	18	735	2.282	0.00618727	1.1903	2.2085
NP_650809.1	CG6255	CG6255 [Drosophila melanogaster]	3	342	13.258	0.0064089	3.72879	2.19322
NP_524407.1	ninaE	neither inactivation nor afterpotential E [Drosophila melanogaster]	7	373	3.215	0.00641512	1.68482	2.1928
NP_001285108.1	Rpt3	regulatory particle triple-A ATPase 3, isoform B [Drosophila melanogaster]	14	413	1.743	0.00641969	0.801573	2.19249
NP_725115.1	RpS11	ribosomal protein S11, isoform B [Drosophila melanogaster]	4	154	3.181	0.00642703	1.66948	2.19199
NP_652031.2	Prosbeta1	proteasome beta1 subunit [Drosophila melanogaster]	4	224	1.684	0.0064552	0.751892	2.19009
NP_476617.1	LanA	laminin A [Drosophila melanogaster]	58	3712	1.927	0.00645719	0.946357	2.18996
NP_001284912.1	Usp30	ubiquitin specific protease 30, isoform B [Drosophila melanogaster]	3	558	1.487	0.00649028	0.572405	2.18774
NP_476590.1	Khc	kinesin heavy chain [Drosophila melanogaster]	51	975	2.12	0.00657237	1.08406	2.18228
NP_477459.1	Akap200	A kinase anchor protein 200, isoform B [Drosophila melanogaster]	1	372	1.626	0.00657521	0.701327	2.18209
NP_728643.2	ABCB7	ATP binding cassette subfamily B member 7, isoform B [Drosophila melanogaster]	30	709	0.465	0.00664056	-1.1047	2.1778
NP_001260368.1	SCAR	SCAR, isoform D [Drosophila melanogaster]	9	674	1.709	0.0066516	0.773152	2.17707
NP_788898.1	Ant2	adenine nucleotide translocase 2, isoform B [Drosophila melanogaster]	3	307	3.585	0.0067651	1.84197	2.16973
NP_001285984.1	Cyt-c-p	cytochrome c proximal, isoform B [Drosophila melanogaster]	14	108	0.436	0.00676695	-1.1976	2.16961
NP_611410.1	EndoB	endophilin B, isoform A [Drosophila melanogaster]	15	390	1.834	0.00678774	0.874994	2.16827
NP_001263137.1	chp	chaoptin, isoform D [Drosophila melanogaster]	54	1338	2.602	0.00688431	1.37962	2.16214
NP_611238.2	ND-51L1	NADH dehydrogenase (ubiquinone) 51 kDa subunit-like 1 [Drosophila melanogaster]	3	702	2.913	0.00689281	1.54251	2.1616
NP_647942.1	ATPsynCF6L	ATP synthase, coupling factor 6-like [Drosophila melanogaster]	3	147	8.399	0.00695914	3.07022	2.15744
NP_725339.1	shot	short stop, isoform H [Drosophila melanogaster]	37	8805	2.733	0.00702135	1.45049	2.15358
NP_477378.1	Thiolase	thiolase [Drosophila melanogaster]	30	469	0.595	0.00707029	-0.749038	2.15056
NP_001246678.1	CG43078	uncharacterized protein Dmel_CG43078, isoform H [Drosophila melanogaster]	21	2540	3.137	0.00707597	1.64939	2.15021
NP_729053.2	CG10671	uncharacterized protein Dmel_CG10671, isoform B [Drosophila melanogaster]	6	480	1.835	0.0071677	0.87578	2.14462
NP_001285505.1	CG1532	CG1532, isoform B [Drosophila melanogaster]	6	288	0.809	0.00724195	-0.305788	2.14014
NP_648409.1	ND-13B	NADH dehydrogenase (ubiquinone) 13 kDa B subunit [Drosophila melanogaster]	12	124	0.133	0.00726278	-2.9105	2.1389
NP_647836.2	Sc2	Sc2 [Drosophila melanogaster]	16	302	1.346	0.00727505	0.428678	2.13816
NP_610609.1	CG12935	uncharacterized protein Dmel_CG12935, isoform A [Drosophila melanogaster]	5	231	0.286	0.00734408	-1.80591	2.13406
NP_524061.1	DCTN1-p150	dynactin 1, p150 subunit [Drosophila melanogaster]	18	1265	2.119	0.00736065	1.08338	2.13308
NP_730777.1	ND-MLRQ	NADH dehydrogenase (ubiquinone) MLRQ subunit, isoform A [Drosophila melanogaster]	10	83	0.195	0.00740138	-2.35845	2.13069
NP_524000.1	Hsp27	heat shock protein 27, isoform A [Drosophila melanogaster]	16	213	3.103	0.00742344	1.63366	2.12939
NP_651416.1	CG5028	CG5028, isoform A [Drosophila melanogaster]	20	402	2.245	0.00757233	1.16672	2.12077
NP_524270.2	mRpS9	mitochondrial ribosomal protein S9 [Drosophila melanogaster]	11	395	0.387	0.00759801	-1.36959	2.1193
NP_001245533.1	Mlc-c	myosin light chain cytoplasmic, isoform B [Drosophila melanogaster]	6	153	0.312	0.00766564	-1.68038	2.11545
NP_001284854.1	Fas2	fasciclin 2, isoform G [Drosophila melanogaster]	33	885	1.554	0.0077592	0.635987	2.11018
NP_001097440.1	Unc-89	Unc-89, isoform C [Drosophila melanogaster]	63	4218	2.833	0.00776962	1.50233	2.1096
NP_996346.2	Vap33	VAMP-associated protein 33kDa, isoform E [Drosophila melanogaster]	15	269	1.552	0.0077829	0.634129	2.10886
NP_001097274.1	CG34228	uncharacterized protein Dmel_CG34228 [Drosophila melanogaster]	4	88	1.954	0.00780735	0.96643	2.1075
NP_001033870.1	capt	capulet, isoform B [Drosophila melanogaster]	21	783	2.234	0.00788991	1.15963	2.10293
NP_723454.1	Eaat1	excitatory amino acid transporter 1, isoform B [Drosophila melanogaster]	9	479	1.843	0.00791027	0.882056	2.10181
NP_001015387.1	Tim23	translocase of inner mitochondrial membrane 23 [Drosophila melanogaster]	4	206	1.426	0.00797306	0.511974	2.09837
NP_649675.2	CG1307	CG1307, isoform C [Drosophila melanogaster]	8	186	0.511	0.00805303	-0.968605	2.09404
NP_001163769.1	Vha100-1	vacuolar H[+] ATPase 100kD subunit 1, isoform J [Drosophila melanogaster]	3	852	2.583	0.00811199	1.36905	2.09087
NP_728869.1	PHGPx	PHGPx, isoform D [Drosophila melanogaster]	15	238	1.931	0.00812497	0.949348	2.09018
NP_572162.2	CG3626	CG3626 [Drosophila melanogaster]	7	939	1.354	0.00813884	0.437228	2.08944
NP_729218.1	Dbi	Diazepam-binding inhibitor, isoform A [Drosophila melanogaster]	6	86	0.21	0.00818118	-2.25154	2.08718
NP_649069.2	CG3902	CG3902 [Drosophila melanogaster]	21	414	0.584	0.00823873	-0.77596	2.08414
NP_611155.3	unc-104	uncoordinated-104, isoform D [Drosophila melanogaster]	14	1739	2.417	0.00824851	1.27322	2.08362
NP_729613.1	S-Lap4	Sperm-Leucylaminopeptidase 4 [Drosophila melanogaster]	12	524	4.436	0.00827192	2.14926	2.08239
NP_610181.2	CG17337	uncharacterized protein Dmel_CG17337, isoform A [Drosophila melanogaster]	25	478	1.359	0.00841309	0.442545	2.07504
NP_609239.1	mRpL51	mitochondrial ribosomal protein L51 [Drosophila melanogaster]	7	174	0.415	0.00841736	-1.26882	2.07482
NP_610342.1	ACC	Acetyl-CoA carboxylase, isoform A [Drosophila melanogaster]	51	2482	2.186	0.00843105	1.12829	2.07412
NP_572278.1	CG3011	CG3011, isoform A [Drosophila melanogaster]	28	537	1.691	0.00850921	0.757877	2.07011
NP_001246877.1	CG7470	CG7470, isoform B [Drosophila melanogaster]	45	776	2.026	0.00854335	1.01863	2.06837
NP_726788.1	CG4199	CG4199, isoform C [Drosophila melanogaster]	17	593	1.878	0.00872527	0.909197	2.05922
NP_476821.1	tam	tamas [Drosophila melanogaster]	4	1145	0.415	0.00875231	-1.26882	2.05788
NP_524364.2	FK506-bp1	FK506-binding protein 1 [Drosophila melanogaster]	16	357	0.394	0.00882963	-1.34373	2.05406
NP_001261007.1	Zasp52	Z band alternatively spliced PDZ-motif protein 52, isoform N [Drosophila melanogaster]	5	1267	6.693	0.00883162	2.74265	2.05396
NP_477310.2	Uba1	ubiquitin activating enzyme 1, isoform A [Drosophila melanogaster]	35	1191	1.356	0.00891609	0.439357	2.04983
NP_650070.1	ninaG	ninaG, isoform A [Drosophila melanogaster]	2	597	3.033	0.0090837	1.60075	2.04174
NP_001286309.1	metro	menage a trois, isoform D [Drosophila melanogaster]	2	546	2.452	0.00936937	1.29396	2.02829
NP_001260321.1	Usp14	ubiquitin specific protease 14, isoform B [Drosophila melanogaster]	8	475	2.143	0.00944818	1.09963	2.02465
NP_572639.2	CG1628	CG1628, isoform B [Drosophila melanogaster]	4	459	0.579	0.00945932	-0.788365	2.02414
NP_524884.1	RpS14a	ribosomal protein S14a, isoform B [Drosophila melanogaster]	13	151	1.717	0.00957789	0.77989	2.01873
NP_726318.1	roh	reduction of Rh1, isoform A [Drosophila melanogaster]	9	82	0.162	0.00957918	-2.62593	2.01867
NP_650991.1	CG6656	CG6656 [Drosophila melanogaster]	7	395	1.682	0.00965422	0.750178	2.01528
NP_001246141.1	CG17508	uncharacterized protein Dmel_CG17508, isoform B [Drosophila melanogaster]	1	194	3.635	0.00967257	1.86196	2.01446
NP_001246359.1	Asph	aspartyl beta-hydroxylase, isoform J [Drosophila melanogaster]	4	400	6.533	0.00968471	2.70775	2.01391
NP_608978.2	Gal	beta galactosidase, isoform A [Drosophila melanogaster]	21	672	2.669	0.00971987	1.4163	2.01234
NP_647884.1	CG1311	CG1311, isoform A [Drosophila melanogaster]	6	691	1.578	0.00983439	0.658097	2.00725
NP_001261020.1	Asph	aspartyl beta-hydroxylase, isoform L [Drosophila melanogaster]	8	991	2.178	0.0100374	1.123	1.99838
NP_610875.1	cbs	centrosomin's beautiful sister, isoform A [Drosophila melanogaster]	4	611	3.112	0.0100995	1.63784	1.9957
NP_001259408.1	Neb-cGP	Neb-cGP, isoform B [Drosophila melanogaster]	3	48	0.488	0.0102294	-1.03505	1.99015
NP_001246229.1	brp	bruchpilot, isoform K [Drosophila melanogaster]	1	1707	3.36	0.0102374	1.74846	1.98981
NP_648358.2	Zasp67	Z band alternatively spliced PDZ-motif protein 67, isoform G [Drosophila melanogaster]	9	730	3.462	0.0103127	1.79161	1.98663
NP_651051.1	Pebp1	Phosphatidylethanolamine-binding protein 1 [Drosophila melanogaster]	9	176	0.095	0.0103327	-3.39593	1.98579
NP_608827.1	Tps1	Trehalose-6-phosphate synthase 1 [Drosophila melanogaster]	32	809	2.566	0.0103562	1.35952	1.9848
NP_001163784.1	gammaCOP	coat protein (coatomer) gamma, isoform C [Drosophila melanogaster]	2	878	2.936	0.0103905	1.55385	1.98336
NP_650696.1	Mdh2	malate dehydrogenase 2 [Drosophila melanogaster]	34	336	0.489	0.0104777	-1.03209	1.97974
NP_649128.1	CG9231	CG9231, isoform A [Drosophila melanogaster]	9	125	0.442	0.0105778	-1.17788	1.97561
NP_524382.1	mRpS11	mitochondrial ribosomal protein S11 [Drosophila melanogaster]	5	200	0.541	0.0106694	-0.8863	1.97186
NP_511096.2	Ost48	oligosaccharyltransferase 48kD subunit [Drosophila melanogaster]	16	449	1.327	0.0106841	0.408168	1.97126
NP_611983.2	Tina-1	troponin C-akin-1, isoform A [Drosophila melanogaster]	8	167	0.609	0.0106865	-0.715486	1.97116
NP_001261364.1	ZnT63C	zinc transporter 63C, isoform F [Drosophila melanogaster]	2	545	3.021	0.0107741	1.59503	1.96762
NP_001284943.1	ND-B16.6	NADH dehydrogenase (ubiquinone) B16.6 subunit, isoform B [Drosophila melanogaster]	12	154	0.229	0.0109516	-2.12658	1.96052
NP_001014681.2	Doa	darkener of apricot, isoform P [Drosophila melanogaster]	2	2045	3.353	0.011004	1.74545	1.95845
NP_001014504.1	Asap	ArfGAP with SH3 domain, ankyrin repeat and PH domain, isoform B [Drosophila melanogaster]	6	1155	1.78	0.0110361	0.831877	1.95719
NP_523976.1	Arr2	arrestin 2 [Drosophila melanogaster]	25	401	2.329	0.0110895	1.21971	1.95509
NP_525109.1	Rab32	Rab32, isoform B [Drosophila melanogaster]	31	686	1.635	0.0111816	0.709291	1.9515
NP_001104092.2	JYalpha	JYalpha [Drosophila melanogaster]	3	1009	2.624	0.0112316	1.39177	1.94956
NP_524243.2	Rm62	Rm62, isoform A [Drosophila melanogaster]	28	719	0.527	0.0113186	-0.924125	1.94621
NP_731252.1	mRpS18A	mitochondrial ribosomal protein S18A [Drosophila melanogaster]	3	155	0.477	0.0115922	-1.06794	1.93583
NP_524758.1	Surf1	surfeit 1 [Drosophila melanogaster]	6	300	0.475	0.0115945	-1.074	1.93575
NP_651852.1	ATPsynC	ATP synthase, subunit C, isoform A [Drosophila melanogaster]	3	138	0.748	0.0116236	-0.41889	1.93466
NP_649598.1	CG1208	CG1208, isoform B [Drosophila melanogaster]	3	496	2.592	0.0118053	1.37407	1.92792
NP_523785.2	mRpS28	mitochondrial ribosomal protein S28 [Drosophila melanogaster]	3	194	0.323	0.0118172	-1.63039	1.92749
NP_649756.2	CG2698	CG2698, isoform A [Drosophila melanogaster]	2	817	3.579	0.0118442	1.83956	1.92649
NP_001260311.1	Dref	DNA replication-related element factor, isoform B [Drosophila melanogaster]	3	709	2.096	0.0118623	1.06764	1.92583
NP_610900.1	S-Lap7	Sperm-Leucylaminopeptidase 7, isoform A [Drosophila melanogaster]	7	527	6.331	0.0121369	2.66243	1.91589
NP_651314.1	CG11771	uncharacterized protein Dmel_CG11771 [Drosophila melanogaster]	30	730	0.541	0.0121864	-0.8863	1.91412
NP_524275.1	mRpL1	mitochondrial ribosomal protein L1 [Drosophila melanogaster]	11	354	0.511	0.0122038	-0.968605	1.91351
NP_001036652.1	mRpS5	mitochondrial ribosomal protein S5, isoform C [Drosophila melanogaster]	8	407	0.446	0.0123276	-1.16488	1.90912
NP_001285678.1	COX5B	cytochrome c oxidase subunit 5B, isoform B [Drosophila melanogaster]	9	120	0.251	0.0123321	-1.99424	1.90896
NP_001259175.1	Pgd	phosphogluconate dehydrogenase, isoform B [Drosophila melanogaster]	13	481	1.829	0.0123668	0.871055	1.90774
NP_996113.2	Lmpt	limpet, isoform K [Drosophila melanogaster]	68	2147	1.595	0.0123709	0.673556	1.9076
NP_787998.1	Akap200	A kinase anchor protein 200, isoform D [Drosophila melanogaster]	11	837	2.377	0.0123883	1.24914	1.90699
NP_572757.2	CG2025	CG2025 [Drosophila melanogaster]	6	1147	1.738	0.0123993	0.797428	1.9066
NP_610693.1	Tret1-1	trehalose transporter 1-1, isoform A [Drosophila melanogaster]	15	857	2.834	0.0124238	1.50284	1.90575
NP_650783.2	Cyp12a4	Cyp12a4 [Drosophila melanogaster]	14	536	0.389	0.0125577	-1.36216	1.90109
NP_001261023.1	Atg9	Autophagy-related 9, isoform B [Drosophila melanogaster]	12	852	1.586	0.0126001	0.665393	1.89963
NP_001262895.1	Miro	mitochondrial Rho, isoform F [Drosophila melanogaster]	5	673	2.276	0.012801	1.1865	1.89276
NP_001303469.1	CG11035	uncharacterized protein Dmel_CG11035, isoform B [Drosophila melanogaster]	8	231	0.308	0.0128758	-1.699	1.89022
NP_524877.1	comt	comatose, isoform A [Drosophila melanogaster]	28	745	2.097	0.0128784	1.06833	1.89014
NP_524776.1	ergic53	ergic53, isoform A [Drosophila melanogaster]	24	512	1.506	0.012971	0.590722	1.88703
NP_001137683.2	Ehbp1	Eps15 homology domain containing protein-binding protein 1, isoform I [Drosophila melanogaster]	7	994	2.597	0.0129908	1.37685	1.88636
NP_524593.1	mRpS18C	mitochondrial ribosomal protein S18C [Drosophila melanogaster]	6	140	0.409	0.0130911	-1.28983	1.88302
NP_001163112.1	whd	withered, isoform D [Drosophila melanogaster]	19	782	1.528	0.0132363	0.611645	1.87823
NP_001259878.1	mRpL48	mitochondrial ribosomal protein L48, isoform B [Drosophila melanogaster]	5	181	0.306	0.013278	-1.7084	1.87687
NP_001188664.1	Ucp4A	Ucp4A, isoform B [Drosophila melanogaster]	5	340	0.501	0.0132851	-0.997117	1.87663
NP_001286835.1	betaTub60D	beta-Tubulin at 60D, isoform B [Drosophila melanogaster]	1	453	3.4	0.0133167	1.76553	1.8756
NP_001285889.1	ND-B22	NADH dehydrogenase (ubiquinone) B22 subunit, isoform B [Drosophila melanogaster]	15	144	0.161	0.0134318	-2.63487	1.87186
NP_611297.3	CG10914	uncharacterized protein Dmel_CG10914 [Drosophila melanogaster]	4	624	0.459	0.013446	-1.12343	1.87141
NP_001188695.1	Msp300	Muscle-specific protein 300 kDa, isoform G [Drosophila melanogaster]	12	13540	2.858	0.0134844	1.51501	1.87017
NP_524448.3	PyK	pyruvate kinase, isoform A [Drosophila melanogaster]	34	533	2.169	0.0136262	1.11703	1.86563
NP_726155.1	Synj	synaptojanin, isoform A [Drosophila melanogaster]	11	1218	1.428	0.0137441	0.513996	1.86188
NP_651446.2	CG42235	uncharacterized protein Dmel_CG42235, isoform D [Drosophila melanogaster]	3	698	2.141	0.0140698	1.09828	1.85171
NP_523503.2	ninaC	neither inactivation nor afterpotential C, isoform B [Drosophila melanogaster]	19	1501	3.103	0.0141642	1.63366	1.84881
NP_572710.1	CG11752	uncharacterized protein Dmel_CG11752 [Drosophila melanogaster]	3	109	0.218	0.0142186	-2.1976	1.84714
NP_732653.2	CG31233	uncharacterized protein Dmel_CG31233, isoform A [Drosophila melanogaster]	40	952	0.235	0.0142813	-2.08927	1.84523
NP_572237.1	CG42492	uncharacterized protein Dmel_CG42492, isoform A [Drosophila melanogaster]	6	916	2.264	0.0144469	1.17887	1.84023
NP_536731.1	Cat	catalase [Drosophila melanogaster]	38	506	1.926	0.014476	0.945608	1.83935
NP_726636.2	CaMKII	Calcium/calmodulin-dependent protein kinase II, isoform E [Drosophila melanogaster]	4	509	3.44	0.0145376	1.78241	1.83751
NP_569845.2	CG17896	uncharacterized protein Dmel_CG17896, isoform B [Drosophila melanogaster]	26	520	0.708	0.0146152	-0.498179	1.83519
NP_001260128.1	Cpr	cytochrome P450 reductase, isoform C [Drosophila melanogaster]	47	679	2.032	0.0146885	1.0229	1.83302
NP_001247372.1	tmod	tropomodulin, isoform N [Drosophila melanogaster]	17	567	1.749	0.0146965	0.80653	1.83278
NP_001246632.1	axo	axotactin, isoform D [Drosophila melanogaster]	1	2070	2.288	0.014703	1.19409	1.83259
NP_732652.1	CG31343	uncharacterized protein Dmel_CG31343 [Drosophila melanogaster]	24	961	0.27	0.0147872	-1.88897	1.83011
NP_609047.1	COX5BL	cytochrome c oxidase subunit 5B-like [Drosophila melanogaster]	2	154	2.592	0.0149334	1.37407	1.82584
NP_650366.1	HtrA2	HTRA2-related serine protease, isoform A [Drosophila melanogaster]	5	422	1.369	0.0150074	0.453122	1.8237
NP_001259537.2	Clic	chloride intracellular channel, isoform C [Drosophila melanogaster]	5	260	0.7	0.0150343	-0.514573	1.82292
NP_730917.1	CG31538	uncharacterized protein Dmel_CG31538 [Drosophila melanogaster]	8	563	10.86	0.0151532	3.44095	1.81949
NP_611596.1	ND-B12	NADH dehydrogenase (ubiquinone) B12 subunit, isoform A [Drosophila melanogaster]	5	110	0.305	0.015258	-1.71312	1.8165
NP_001246228.1	brp	bruchpilot, isoform J [Drosophila melanogaster]	1	2238	2.952	0.0152887	1.56169	1.81563
NP_477395.1	alphaCOP	coat protein (coatomer) alpha, isoform A [Drosophila melanogaster]	17	1234	1.875	0.015434	0.906891	1.81152
NP_001246494.1	Nurf-38	nucleosome remodeling factor - 38kD, isoform C [Drosophila melanogaster]	1	290	0.461	0.0155117	-1.11716	1.80934
NP_476714.1	sgg	shaggy, isoform A [Drosophila melanogaster]	1	575	2.79	0.015569	1.48027	1.80774
NP_001247215.1	Calx	Na/Ca-exchange protein, isoform G [Drosophila melanogaster]	1	973	2.41	0.0157481	1.26903	1.80277
NP_524608.1	gammaCOP	coat protein (coatomer) gamma, isoform A [Drosophila melanogaster]	2	879	2.888	0.0157689	1.53007	1.8022
NP_001286077.1	CG10639	uncharacterized protein Dmel_CG10639, isoform C [Drosophila melanogaster]	22	455	0.68	0.0159508	-0.556393	1.79722
NP_001285923.1	bgm	bubblegum, isoform C [Drosophila melanogaster]	22	666	0.364	0.0160571	-1.45799	1.79433
NP_001163221.1	RIC-3	RIC3 acetylcholine receptor chaperone, isoform H [Drosophila melanogaster]	2	456	4.872	0.0160619	2.28451	1.7942
NP_573357.1	Mec2	Mec2 [Drosophila melanogaster]	13	350	1.867	0.0160626	0.900722	1.79418
NP_728074.1	Fim	fimbrin, isoform D [Drosophila melanogaster]	17	641	0.441	0.016401	-1.18115	1.78513
NP_524939.1	mRpL4	mitochondrial ribosomal protein L4 [Drosophila melanogaster]	9	296	0.625	0.0165299	-0.678072	1.78173
NP_609533.1	CG12264	uncharacterized protein Dmel_CG12264 [Drosophila melanogaster]	16	462	0.731	0.0167394	-0.452057	1.77626
NP_609027.3	CG9527	CG9527, isoform A [Drosophila melanogaster]	35	703	0.764	0.0169352	-0.388355	1.77121
NP_524830.2	Faa	fumarylacetoacetase [Drosophila melanogaster]	5	417	1.762	0.0169771	0.817214	1.77014
NP_523811.1	mRpS29	mitochondrial ribosomal protein S29 [Drosophila melanogaster]	11	392	0.332	0.0169879	-1.59074	1.76986
NP_523932.2	AlaRS-m	Alanyl-tRNA synthetase, mitochondrial [Drosophila melanogaster]	6	1012	0.275	0.0170476	-1.8625	1.76834
NP_001260388.1	Vha100-5	vacuolar H[+] ATPase 100kD subunit 5, isoform B [Drosophila melanogaster]	22	814	0.314	0.0172415	-1.67116	1.76343
NP_610985.1	ND-B15	NADH dehydrogenase (ubiquinone) B15 subunit [Drosophila melanogaster]	11	113	0.086	0.0176843	-3.53952	1.75241
NP_649578.1	CG2100	CG2100, isoform A [Drosophila melanogaster]	2	477	0.769	0.0177666	-0.378944	1.7504
NP_651002.3	CG6028	CG6028 [Drosophila melanogaster]	15	293	0.847	0.0178003	-0.239566	1.74957
NP_727353.1	LysRS	Lysyl-tRNA synthetase, isoform B [Drosophila melanogaster]	21	607	1.379	0.0180174	0.463622	1.74431
NP_649263.2	Pka-R1	protein kinase, cAMP-dependent, regulatory subunit type 1, isoform O [Drosophila melanogaster]	1	463	1.976	0.0183352	0.982583	1.73671
NP_001261879.1	Eip71CD	Ecdysone-induced protein 28/29kD, isoform G [Drosophila melanogaster]	3	261	1.602	0.0185555	0.679874	1.73153
NP_647696.1	CG15820	uncharacterized protein Dmel_CG15820 [Drosophila melanogaster]	4	308	0.506	0.0186011	-0.982791	1.73046
NP_611142.3	CG5089	CG5089 [Drosophila melanogaster]	9	436	8.656	0.0186586	3.1137	1.72912
NP_648843.1	CG5157	CG5157 [Drosophila melanogaster]	4	119	0.353	0.0188486	-1.50226	1.72472
NP_001285613.1	ND-13A	NADH dehydrogenase (ubiquinone) 13 kDa A subunit, isoform B [Drosophila melanogaster]	7	126	0.164	0.0188585	-2.60823	1.72449
NP_001260946.1	ValRS	Valyl-tRNA synthetase, isoform C [Drosophila melanogaster]	27	1055	1.32	0.0190957	0.400538	1.71907
NP_650015.3	CG45076	uncharacterized protein Dmel_CG45076, isoform A [Drosophila melanogaster]	23	619	2.754	0.0192076	1.46153	1.71653
NP_001137642.1	metro	menage a trois, isoform B [Drosophila melanogaster]	2	556	2.427	0.0193812	1.27917	1.71262
NP_724163.1	Ddc	dopa decarboxylase, isoform C [Drosophila melanogaster]	5	510	1.682	0.0194533	0.750178	1.71101
NP_610107.1	CG8665	CG8665 [Drosophila melanogaster]	6	913	1.982	0.01948	0.986957	1.71041
NP_001162825.1	bt	bent, isoform F [Drosophila melanogaster]	163	8933	1.594	0.0195409	0.672652	1.70905
NP_524682.1	sun	stunted, isoform A [Drosophila melanogaster]	2	61	0.211	0.0195448	-2.24469	1.70897
NP_001163746.1	scrib	scribbled, isoform L [Drosophila melanogaster]	11	2585	3.077	0.0195777	1.62152	1.70824
NP_001260353.1	CG6094	CG6094, isoform B [Drosophila melanogaster]	8	203	0.533	0.0197758	-0.907793	1.70387
NP_724106.1	Fas3	fasciclin 3, isoform B [Drosophila melanogaster]	2	401	2.886	0.019779	1.52907	1.7038
NP_001162632.2	futsch	futsch, isoform E [Drosophila melanogaster]	107	5495	2.708	0.0198172	1.43723	1.70296
NP_650829.1	CG11659	uncharacterized protein Dmel_CG11659 [Drosophila melanogaster]	5	546	3.108	0.0198473	1.63599	1.7023
NP_001284997.1	mys	myospheroid, isoform B [Drosophila melanogaster]	8	846	1.802	0.0198691	0.849599	1.70182
NP_732654.1	CG31198	uncharacterized protein Dmel_CG31198 [Drosophila melanogaster]	35	940	0.258	0.0198928	-1.95456	1.7013
NP_524956.2	Spn38F	serpin 38F, isoform A [Drosophila melanogaster]	8	372	2.574	0.0202003	1.36401	1.69464
NP_569951.1	Pgam5	phosphoglycerate mutase 5, isoform A [Drosophila melanogaster]	10	289	0.741	0.0202931	-0.432455	1.69265
NP_726633.2	CaMKII	Calcium/calmodulin-dependent protein kinase II, isoform A [Drosophila melanogaster]	2	490	3.348	0.0204653	1.7433	1.68898
NP_727588.2	regucalcin	regucalcin, isoform D [Drosophila melanogaster]	22	319	1.941	0.0209578	0.9568	1.67866
NP_001286038.1	Fas3	fasciclin 3, isoform G [Drosophila melanogaster]	3	557	2.267	0.0210637	1.18078	1.67647
NP_610040.1	CG17472	uncharacterized protein Dmel_CG17472 [Drosophila melanogaster]	3	159	3.012	0.021071	1.59072	1.67632
NP_511062.1	Spat	serine pyruvate aminotransferase [Drosophila melanogaster]	9	394	3.321	0.0214614	1.73162	1.66834
NP_610174.1	CG11665	uncharacterized protein Dmel_CG11665, isoform A [Drosophila melanogaster]	15	658	1.687	0.02162	0.75446	1.66514
NP_723087.1	CG31915	uncharacterized protein Dmel_CG31915 [Drosophila melanogaster]	4	612	2.008	0.0216711	1.00576	1.66412
NP_608912.1	Cyp28d1	Cyp28d1 [Drosophila melanogaster]	26	502	1.364	0.0219959	0.447844	1.65766
NP_726463.1	ATPsynF	ATP synthase, subunit F, isoform A [Drosophila melanogaster]	10	107	0.158	0.0220699	-2.662	1.6562
NP_523388.1	beta-Spec	beta spectrin, isoform A [Drosophila melanogaster]	3	2291	1.67	0.0222275	0.739848	1.65311
NP_725511.2	Strn-Mlck	Stretchin-Mlck, isoform R [Drosophila melanogaster]	66	1918	2.842	0.022263	1.50691	1.65242
NP_523842.2	betaTub60D	beta-Tubulin at 60D, isoform A [Drosophila melanogaster]	1	454	2.31	0.0222846	1.20789	1.652
NP_524675.1	Pgm	phosphoglucose mutase [Drosophila melanogaster]	19	560	1.316	0.0224012	0.396159	1.64973
NP_788023.1	CG33129	uncharacterized protein Dmel_CG33129, isoform E [Drosophila melanogaster]	17	677	0.648	0.0224254	-0.625934	1.64926
NP_524385.2	CREG	cellular repressor of E1A-stimulated genes, isoform A [Drosophila melanogaster]	12	211	1.881	0.0224305	0.9115	1.64916
NP_611967.1	TyrRS-m	Tyrosyl-tRNA synthetase, mitochondrial [Drosophila melanogaster]	8	464	0.512	0.0225415	-0.965784	1.64702
NP_001097389.1	RIC-3	RIC3 acetylcholine receptor chaperone, isoform E [Drosophila melanogaster]	1	481	3.381	0.0225987	1.75745	1.64592
NP_001261826.1	Fbp1	Fat body protein 1, isoform D [Drosophila melanogaster]	1	1027	3.417	0.0227698	1.77273	1.64264
NP_649168.2	Gabat	gamma-aminobutyric acid transaminase, isoform A [Drosophila melanogaster]	35	486	0.473	0.0231238	-1.08009	1.63594
NP_611606.1	Tim10	translocase of inner membrane 10, isoform A [Drosophila melanogaster]	2	92	0.158	0.0232807	-2.662	1.633
NP_001259133.1	CG11448	uncharacterized protein Dmel_CG11448, isoform C [Drosophila melanogaster]	3	486	1.882	0.0233037	0.912267	1.63258
NP_729396.2	Zasp66	Z band alternatively spliced PDZ-motif protein 66, isoform F [Drosophila melanogaster]	4	402	2.384	0.0233528	1.25338	1.63166
NP_001189276.1	Syx1A	syntaxin 1A, isoform B [Drosophila melanogaster]	20	296	1.723	0.0233552	0.784923	1.63162
NP_001285925.1	CG15293	uncharacterized protein Dmel_CG15293, isoform C [Drosophila melanogaster]	20	333	2.23	0.0235687	1.15704	1.62766
NP_609040.1	CG9547	CG9547 [Drosophila melanogaster]	9	419	0.701	0.023581	-0.512514	1.62744
NP_724664.1	CG30376	uncharacterized protein Dmel_CG30376 [Drosophila melanogaster]	4	226	6.721	0.0236073	2.74868	1.62695
NP_524297.1	alphaTub85E	alpha-Tubulin at 85E [Drosophila melanogaster]	2	449	8.628	0.0236731	3.10903	1.62574
NP_573000.1	CG5599	CG5599 [Drosophila melanogaster]	13	462	0.444	0.0237269	-1.17137	1.62476
NP_995906.1	HnRNP-K	heterogeneous nuclear ribonucleoprotein K, isoform C [Drosophila melanogaster]	14	502	1.383	0.023784	0.467801	1.62372
NP_722838.1	Syt1	synaptotagmin 1, isoform B [Drosophila melanogaster]	1	472	2.833	0.0239304	1.50233	1.62105
NP_001260514.1	Cyt-b5-r	cytochrome b5-related, isoform B [Drosophila melanogaster]	11	436	1.961	0.0239528	0.97159	1.62064
NP_523737.1	mRpS16	mitochondrial ribosomal protein S16 [Drosophila melanogaster]	4	129	0.049	0.0239663	-4.35107	1.6204
NP_525073.1	mRpL30	mitochondrial ribosomal protein L30 [Drosophila melanogaster]	16	180	0.455	0.0240387	-1.13606	1.61909
NP_650199.1	CG5844	CG5844 [Drosophila melanogaster]	12	378	0.596	0.0240399	-0.746616	1.61907
NP_001285318.1	Mfe2	peroxisomal multifunctional enzyme type 2, isoform B [Drosophila melanogaster]	37	598	2.241	0.0241395	1.16414	1.61727
NP_610780.1	CG8520	CG8520, isoform A [Drosophila melanogaster]	9	458	0.445	0.0250709	-1.16812	1.60083
NP_651399.2	CG5116	CG5116, isoform A [Drosophila melanogaster]	2	526	0.49	0.0252463	-1.02915	1.5978
NP_611095.1	clu	clueless, isoform A [Drosophila melanogaster]	21	1448	0.469	0.025504	-1.09234	1.59339
NP_523460.2	Syt1	synaptotagmin 1, isoform A [Drosophila melanogaster]	3	474	3.978	0.0255341	1.99204	1.59288
NP_524075.2	mRpL39	mitochondrial ribosomal protein L39 [Drosophila melanogaster]	15	333	0.604	0.0256438	-0.72738	1.59102
NP_001262658.1	cher	cheerio, isoform M [Drosophila melanogaster]	102	2429	1.731	0.0257468	0.791606	1.58928
NP_477194.1	ATPsynCF6	ATP synthase, coupling factor 6, isoform A [Drosophila melanogaster]	15	106	0.131	0.0266181	-2.93236	1.57482
NP_572182.1	CG7024	CG7024 [Drosophila melanogaster]	3	479	5.684	0.0271287	2.50691	1.56657
NP_728294.1	COX6B	cytochrome c oxidase subunit 6B, isoform A [Drosophila melanogaster]	14	96	0.313	0.0271445	-1.67577	1.56632
NP_651217.2	GatB	Glutamyl-tRNA amidotransferase, subunit B [Drosophila melanogaster]	3	516	0.696	0.0272329	-0.522841	1.56491
NP_649018.2	TrpRS-m	Tryptophanyl-tRNA synthetase, mitochondrial, isoform A [Drosophila melanogaster]	16	665	1.451	0.0272447	0.537048	1.56472
NP_996356.1	CG3842	CG3842, isoform B [Drosophila melanogaster]	5	406	2.102	0.0273742	1.07176	1.56266
NP_788758.3	Doa	darkener of apricot, isoform R [Drosophila melanogaster]	2	1229	4.636	0.0276777	2.21288	1.55787
NP_651713.1	Obp99b	Odorant-binding protein 99b, isoform A [Drosophila melanogaster]	5	149	4.197	0.0278058	2.06936	1.55586
NP_001189286.1	CG11089	uncharacterized protein Dmel_CG11089, isoform B [Drosophila melanogaster]	29	590	1.822	0.0282036	0.865523	1.5497
NP_649521.1	CG12163	uncharacterized protein Dmel_CG12163, isoform B [Drosophila melanogaster]	28	475	0.745	0.0282158	-0.424688	1.54951
NP_650356.1	ATPsynE	ATP synthase, subunit E, isoform A [Drosophila melanogaster]	6	81	0.221	0.0283388	-2.17788	1.54762
NP_001137778.2	FASN1	fatty acid synthase 1, isoform C [Drosophila melanogaster]	97	2540	2.001	0.0284888	1.00072	1.54533
NP_523379.2	mRpL22	mitochondrial ribosomal protein L22 [Drosophila melanogaster]	4	233	0.51	0.0285284	-0.971431	1.54472
NP_648555.1	CAH2	carbonic anhydrase 2, isoform A [Drosophila melanogaster]	9	335	0.713	0.0290267	-0.488026	1.5372
NP_649459.4	CG1090	CG1090, isoform G [Drosophila melanogaster]	4	633	3.345	0.0293782	1.74201	1.53198
NP_727209.1	ND-MNLL	NADH dehydrogenase (ubiquinone) MNLL subunit, isoform B [Drosophila melanogaster]	2	56	0.423	0.0294016	-1.24127	1.53163
NP_573385.1	ND-18	NADH dehydrogenase (ubiquinone) 18 kDa subunit [Drosophila melanogaster]	11	183	0.354	0.0294422	-1.49818	1.53103
NP_651052.1	CG5377	CG5377 [Drosophila melanogaster]	7	278	0.662	0.0294957	-0.595097	1.53024
NP_001163558.1	skap	skpA associated protein, isoform C [Drosophila melanogaster]	29	503	1.688	0.0295906	0.755315	1.52885
NP_648112.2	Sh3beta	Sh3beta, isoform B [Drosophila melanogaster]	1	158	2.694	0.0296059	1.42975	1.52862
NP_523968.1	Arp3	Actin-related protein 3, isoform A [Drosophila melanogaster]	9	418	1.286	0.030054	0.362891	1.5221
NP_001246786.1	Mbs	myosin binding subunit, isoform O [Drosophila melanogaster]	5	1273	1.953	0.0304946	0.965692	1.51578
NP_730713.1	Csp	cysteine string protein, isoform B [Drosophila melanogaster]	8	249	1.509	0.0305494	0.593593	1.515
NP_726597.1	gw	gawky, isoform B [Drosophila melanogaster]	6	1384	3.208	0.0306638	1.68167	1.51337
NP_001036641.1	Snap25	Synaptosomal-associated protein 25kDa, isoform A [Drosophila melanogaster]	12	212	1.472	0.0309018	0.557778	1.51002
NP_001137900.1	CG42307	uncharacterized protein Dmel_CG42307, isoform B [Drosophila melanogaster]	4	95	0.494	0.031075	-1.01742	1.50759
NP_649466.1	lost	lost [Drosophila melanogaster]	39	545	1.798	0.0311721	0.846393	1.50623
NP_648622.1	CG11267	uncharacterized protein Dmel_CG11267 [Drosophila melanogaster]	9	103	0.199	0.0311802	-2.32916	1.50612
NP_722780.1	Tengl1	testis EndoG-Like 1 [Drosophila melanogaster]	3	319	4.039	0.0316799	2.014	1.49922
NP_476906.1	Crys	crystallin, isoform A [Drosophila melanogaster]	27	477	0.539	0.0316998	-0.891643	1.49894
NP_523415.1	AP-1-2beta	adaptor protein complex 1/2, beta subunit [Drosophila melanogaster]	13	921	2.363	0.0317943	1.24062	1.49765
NP_724804.1	RpL31	ribosomal protein L31, isoform A [Drosophila melanogaster]	11	124	0.688	0.0319255	-0.53952	1.49586
NP_731506.1	CG45078	uncharacterized protein Dmel_CG45078 [Drosophila melanogaster]	5	163	2.932	0.0321303	1.55189	1.49308
NP_648759.1	CG6888	CG6888 [Drosophila melanogaster]	6	196	2.487	0.0321745	1.31441	1.49249
NP_649230.1	CG5955	CG5955 [Drosophila melanogaster]	2	367	1.614	0.0322963	0.690641	1.49085
NP_524618.1	RpS3A	ribosomal protein S3A, isoform A [Drosophila melanogaster]	24	268	1.516	0.0324116	0.60027	1.4893
NP_728275.1	CG14207	uncharacterized protein Dmel_CG14207, isoform B [Drosophila melanogaster]	4	192	1.667	0.0324685	0.737254	1.48854
NP_524197.1	ppl	pumpless [Drosophila melanogaster]	4	165	0.534	0.0325611	-0.905088	1.4873
NP_523440.1	mRpL10	mitochondrial ribosomal protein L10 [Drosophila melanogaster]	4	248	0.585	0.0326185	-0.773491	1.48654
NP_001285602.1	mRpL27	mitochondrial ribosomal protein L27, isoform C [Drosophila melanogaster]	6	138	0.653	0.033441	-0.614845	1.47572
NP_611097.2	CG44243	uncharacterized protein Dmel_CG44243, isoform B [Drosophila melanogaster]	8	396	1.396	0.0335461	0.481299	1.47436
NP_611892.2	DnaJ-60	DnaJ-like-60, isoform C [Drosophila melanogaster]	5	217	0.423	0.0335703	-1.24127	1.47404
NP_001246038.1	CG3793	CG3793, isoform B [Drosophila melanogaster]	2	341	1.757	0.033903	0.813114	1.46976
NP_650063.1	CG17734	uncharacterized protein Dmel_CG17734, isoform A [Drosophila melanogaster]	3	101	0.465	0.0340501	-1.1047	1.46788
NP_524006.1	LanB2	laminin B2, isoform A [Drosophila melanogaster]	56	1639	1.973	0.0345613	0.980391	1.46141
NP_609999.2	CG10628	uncharacterized protein Dmel_CG10628 [Drosophila melanogaster]	4	383	0.49	0.034649	-1.02915	1.46031
NP_610743.2	Cyp6g1	Cyp6g1, isoform A [Drosophila melanogaster]	12	524	1.986	0.0350169	0.989866	1.45572
NP_995648.1	Pvr	PDGF- and VEGF-receptor related, isoform E [Drosophila melanogaster]	1	1503	2.584	0.0351649	1.36961	1.45389
NP_524938.1	CIAPIN1	cytokine induced apoptosis inhibitor 1 [Drosophila melanogaster]	2	248	1.867	0.0355563	0.900722	1.44908
NP_001285107.1	CG2076	CG2076, isoform B [Drosophila melanogaster]	4	341	0.554	0.0362259	-0.852042	1.44098
NP_611176.1	AsnRS-m	Asparaginyl-tRNA synthetase, mitochondrial [Drosophila melanogaster]	9	460	0.762	0.0364363	-0.392137	1.43847
NP_652042.1	ND-SGDH	NADH dehydrogenase (ubiquinone) SGDH subunit, isoform A [Drosophila melanogaster]	8	186	0.114	0.0366504	-3.13289	1.43592
NP_572408.2	CG10920	uncharacterized protein Dmel_CG10920 [Drosophila melanogaster]	3	397	2.329	0.0366721	1.21971	1.43566
NP_511073.1	RpS6	ribosomal protein S6, isoform B [Drosophila melanogaster]	19	248	1.397	0.0368634	0.482332	1.4334
NP_524363.3	mRpL9	mitochondrial ribosomal protein L9 [Drosophila melanogaster]	11	248	0.647	0.0369078	-0.628162	1.43288
NP_995616.1	colt	congested-like trachea, isoform D [Drosophila melanogaster]	15	306	0.705	0.0370267	-0.504305	1.43149
NP_649602.2	ECSIT	ECSIT [Drosophila melanogaster]	12	409	0.726	0.0372522	-0.461959	1.42885
NP_524634.2	apolpp	apolipophorin, isoform A [Drosophila melanogaster]	198	3351	1.829	0.0377305	0.871055	1.42331
NP_725252.1	TppII	tripeptidyl-peptidase II, isoform D [Drosophila melanogaster]	37	1441	1.513	0.0378406	0.597412	1.42204
NP_724008.1	Mhc	myosin heavy chain, isoform K [Drosophila melanogaster]	2	1936	1.687	0.0385718	0.75446	1.41373
NP_723725.1	ThrRS	Threonyl-tRNA synthetase, isoform A [Drosophila melanogaster]	23	747	1.819	0.0388206	0.863146	1.41094
NP_001036766.2	Cnx99A	calnexin 99A, isoform E [Drosophila melanogaster]	1	604	3.002	0.0390706	1.58592	1.40815
NP_001262783.1	Syp	syncrip, isoform Q [Drosophila melanogaster]	1	761	2.295	0.0401523	1.19849	1.39629
NP_724824.1	CG1648	CG1648, isoform B [Drosophila melanogaster]	41	232	2.454	0.0402072	1.29514	1.3957
NP_001259129.1	MTPAP	mitochondrial poly(A) polymerase, isoform C [Drosophila melanogaster]	5	612	0.428	0.0404326	-1.22432	1.39327
NP_611346.1	CG5323	CG5323 [Drosophila melanogaster]	8	146	0.638	0.0406723	-0.648372	1.3907
NP_001097249.1	TER94	TER94, isoform C [Drosophila melanogaster]	2	826	3.822	0.0412159	1.93433	1.38494
NP_729420.1	CG32026	uncharacterized protein Dmel_CG32026 [Drosophila melanogaster]	3	719	11.272	0.0419224	3.49467	1.37755
NP_001260638.1	CG9319	CG9319, isoform B [Drosophila melanogaster]	11	373	2.068	0.0424084	1.04824	1.37255
NP_477159.1	Hmu	hemomucin [Drosophila melanogaster]	19	579	1.369	0.0427246	0.453122	1.36932
NP_001259772.1	CG14613	uncharacterized protein Dmel_CG14613, isoform B [Drosophila melanogaster]	3	241	0.546	0.043717	-0.873027	1.35935
NP_648615.1	CG10748	uncharacterized protein Dmel_CG10748 [Drosophila melanogaster]	4	349	2.066	0.0439136	1.04684	1.3574
NP_523596.2	bsf	bicoid stability factor [Drosophila melanogaster]	98	1412	0.61	0.0444951	-0.713119	1.35169
NP_524742.1	mRpL12	mitochondrial ribosomal protein L12 [Drosophila melanogaster]	13	182	0.168	0.0446606	-2.57347	1.35008
NP_001259254.1	CG42492	uncharacterized protein Dmel_CG42492, isoform D [Drosophila melanogaster]	6	977	3.158	0.04467	1.65901	1.34998
NP_996529.1	CG33502	uncharacterized protein Dmel_CG33502 [Drosophila melanogaster]	5	283	0.498	0.0447521	-1.00578	1.34919
NP_609590.1	Pih1D1	Pih1D1, isoform A [Drosophila melanogaster]	3	335	2.204	0.0450742	1.14012	1.34607
NP_524537.1	mRpS22	mitochondrial ribosomal protein S22 [Drosophila melanogaster]	9	393	0.205	0.0451386	-2.2863	1.34545
NP_652337.2	CG42540	uncharacterized protein Dmel_CG42540, isoform F [Drosophila melanogaster]	1	506	4.44	0.045365	2.15056	1.34328
NP_726453.1	Letm1	LETM1 ortholog, isoform A [Drosophila melanogaster]	76	1013	1.275	0.0456252	0.350497	1.3408
NP_611544.1	CG10527	uncharacterized protein Dmel_CG10527 [Drosophila melanogaster]	10	296	1.685	0.0456303	0.752749	1.34075
NP_001262811.1	CASK	CASK, isoform H [Drosophila melanogaster]	13	929	1.799	0.045964	0.847195	1.33758
NP_649692.2	Dpck	Dephospho-CoA kinase [Drosophila melanogaster]	6	236	1.616	0.0463815	0.692427	1.33366
NP_001246928.1	mtd	mustard, isoform V [Drosophila melanogaster]	20	1344	1.624	0.0465697	0.699552	1.3319
NP_609479.1	dUTPase	deoxyuridine triphosphatase, isoform A [Drosophila melanogaster]	8	188	0.313	0.0466475	-1.67577	1.33117
NP_001188553.1	CG2059	CG2059, isoform B [Drosophila melanogaster]	5	308	0.666	0.0466993	-0.586406	1.33069
NP_524109.2	Mipp1	multiple inositol polyphosphate phosphatase 1, isoform A [Drosophila melanogaster]	11	467	1.768	0.0467259	0.822118	1.33044
NP_573081.1	ArgRS	Arginyl-tRNA synthetase [Drosophila melanogaster]	10	665	1.293	0.0468605	0.370722	1.32919
NP_524105.2	Pdh	photoreceptor dehydrogenase, isoform A [Drosophila melanogaster]	19	278	1.543	0.046884	0.625738	1.32898
NP_001246082.2	CG17323	uncharacterized protein Dmel_CG17323, isoform E [Drosophila melanogaster]	10	519	1.314	0.0470151	0.393965	1.32776
NP_611857.3	CG16787	uncharacterized protein Dmel_CG16787 [Drosophila melanogaster]	6	253	0.412	0.0473554	-1.27928	1.32463
NP_610384.1	Mal-A8	maltase A8 [Drosophila melanogaster]	14	588	2.643	0.0475222	1.40218	1.3231
NP_647683.1	SCOT	Succinyl-CoA:3-ketoacid CoA transferase, isoform A [Drosophila melanogaster]	18	516	0.57	0.0480812	-0.810966	1.31802
NP_727489.1	Hsp60A	heat shock protein 60A, isoform B [Drosophila melanogaster]	51	573	0.602	0.0480953	-0.732165	1.3179
NP_523598.2	mRpL13	mitochondrial ribosomal protein L13 [Drosophila melanogaster]	4	178	0.526	0.0482197	-0.926865	1.31678
NP_001189035.1	CG16986	uncharacterized protein Dmel_CG16986, isoform B [Drosophila melanogaster]	2	143	0.518	0.0484801	-0.948976	1.31444
NP_001246407.1	CG5174	CG5174, isoform O [Drosophila melanogaster]	3	369	1.489	0.0487501	0.574344	1.31202
NP_649905.1	CG8199	CG8199 [Drosophila melanogaster]	10	439	0.58	0.0487991	-0.785875	1.31159
NP_001261796.1	trn	tartan, isoform B [Drosophila melanogaster]	1	751	0.264	0.0488717	-1.92139	1.31094
NP_996062.3	Ccdc56	Coiled-coil domain containing 56 [Drosophila melanogaster]	4	87	0.567	0.0489323	-0.818579	1.3104
NP_651208.1	CG5991	CG5991, isoform A [Drosophila melanogaster]	13	447	0.427	0.0491483	-1.22769	1.30849
NP_001027263.1	GatC	Glutamyl-tRNA amidotransferase, subunit C [Drosophila melanogaster]	3	148	0.459	0.0493165	-1.12343	1.30701
NP_001260956.1	Vmat	vesicular monoamine transporter, isoform F [Drosophila melanogaster]	1	610	2.667	0.0496366	1.41522	1.3042
NP_722745.1	Got2	glutamate oxaloacetate transaminase 2, isoform B [Drosophila melanogaster]	25	431	0.554	0.0496911	-0.852042	1.30372
NP_477209.2	T3dh	type III alcohol dehydrogenase [Drosophila melanogaster]	9	464	1.631	0.0497833	0.705757	1.30292
NP_001188678.1	Rab35	Rab35, isoform B [Drosophila melanogaster]	13	201	1.378	0.0503241	0.462576	1.29822
NP_523602.2	Top3alpha	topoisomerase 3alpha [Drosophila melanogaster]	3	1250	0.675	0.0505237	-0.567041	1.2965
NP_609536.1	Tom70	translocase of outer membrane 70, isoform A [Drosophila melanogaster]	31	589	0.808	0.0505428	-0.307573	1.29634
NP_476879.1	tok	tolkin, isoform A [Drosophila melanogaster]	4	1464	1.82	0.0507337	0.863938	1.2947
NP_001097431.1	CG34423	uncharacterized protein Dmel_CG34423, isoform A [Drosophila melanogaster]	7	65	3.944	0.0508407	1.97966	1.29379
NP_001285297.1	mRpS30	mitochondrial ribosomal protein S30, isoform B [Drosophila melanogaster]	33	557	0.521	0.0509739	-0.940645	1.29265
NP_001015316.1	CG17514	uncharacterized protein Dmel_CG17514, isoform A [Drosophila melanogaster]	24	2630	1.762	0.0511421	0.817214	1.29122
NP_648149.1	CG12262	uncharacterized protein Dmel_CG12262 [Drosophila melanogaster]	34	419	0.667	0.0512618	-0.584241	1.29021
NP_524614.2	mod	modulo, isoform A [Drosophila melanogaster]	21	542	0.615	0.0516059	-0.701342	1.2873
NP_001261446.1	sif	still life, isoform J [Drosophila melanogaster]	8	2734	2.358	0.0517116	1.23756	1.28641
NP_001303317.1	CG5885	CG5885, isoform B [Drosophila melanogaster]	4	190	0.379	0.0518784	-1.39973	1.28501
NP_728930.1	Gad1	glutamic acid decarboxylase 1, isoform B [Drosophila melanogaster]	15	510	1.908	0.0521609	0.932061	1.28265
NP_996375.1	sdt	stardust, isoform D [Drosophila melanogaster]	17	879	1.677	0.0522006	0.745883	1.28232
NP_524060.2	Hml	hemolectin, isoform A [Drosophila melanogaster]	29	3843	1.9	0.0523131	0.925999	1.28139
NP_608516.1	CG11562	uncharacterized protein Dmel_CG11562 [Drosophila melanogaster]	2	125	0.276	0.0528687	-1.85726	1.2768
NP_001246230.1	brp	bruchpilot, isoform L [Drosophila melanogaster]	1	1781	2.27	0.0530755	1.18269	1.27511
NP_609287.3	Mco1	multicopper oxidase-1, isoform A [Drosophila melanogaster]	6	959	0.764	0.0531213	-0.388355	1.27473
NP_733058.1	CG31121	uncharacterized protein Dmel_CG31121, isoform A [Drosophila melanogaster]	2	911	2.464	0.0533655	1.301	1.27274
NP_569983.1	CG3630	CG3630, isoform A [Drosophila melanogaster]	4	371	2.625	0.0534412	1.39232	1.27212
NP_649563.1	CG12171	uncharacterized protein Dmel_CG12171 [Drosophila melanogaster]	6	257	0.765	0.0534489	-0.386468	1.27206
NP_649971.1	mtTFB2	mitochondrial transcription factor B2 [Drosophila melanogaster]	6	452	0.617	0.054033	-0.696658	1.26734
NP_524546.2	Pglym78	phosphoglyceromutase, isoform A [Drosophila melanogaster]	17	255	0.657	0.0541438	-0.606035	1.26645
NP_477098.1	Rho1	Rho1, isoform A [Drosophila melanogaster]	13	192	1.538	0.054147	0.621056	1.26643
NP_001245927.1	milt	milton, isoform D [Drosophila melanogaster]	2	1256	3.054	0.0541529	1.6107	1.26638
NP_651281.1	CG13630	uncharacterized protein Dmel_CG13630 [Drosophila melanogaster]	8	374	1.759	0.0544218	0.814755	1.26423
NP_523764.1	RpLP2	ribosomal protein LP2 [Drosophila melanogaster]	6	113	0.21	0.0545557	-2.25154	1.26316
NP_477101.1	SdhB	succinate dehydrogenase, subunit B (iron-sulfur) [Drosophila melanogaster]	23	297	0.481	0.0545884	-1.05589	1.2629
NP_001163211.1	par-1	par-1, isoform T [Drosophila melanogaster]	2	1058	2.673	0.0545911	1.41846	1.26288
NP_476857.1	Rap1	Rap1 GTPase, isoform A [Drosophila melanogaster]	9	184	1.573	0.0546921	0.653519	1.26208
NP_723045.1	Col4a1	collagen type IV alpha 1, isoform B [Drosophila melanogaster]	6	1779	1.945	0.0548189	0.95977	1.26107
NP_524550.1	ATPsyngamma	ATP synthase, gamma subunit, isoform A [Drosophila melanogaster]	34	297	0.385	0.0550929	-1.37707	1.2589
NP_524358.2	ATPsynO	ATP synthase, oligomycin sensitivity conferring protein [Drosophila melanogaster]	29	209	0.173	0.0556973	-2.53116	1.25417
NP_724496.1	Eb1	Eb1, isoform A [Drosophila melanogaster]	5	291	1.909	0.0558224	0.932817	1.25319
NP_727689.1	Jafrac1	thioredoxin peroxidase 1, isoform B [Drosophila melanogaster]	11	194	1.431	0.0558956	0.517024	1.25262
NP_001246015.1	Vha68-2	vacuolar H[+] ATPase 68 kDa subunit 2, isoform D [Drosophila melanogaster]	32	614	0.801	0.0561408	-0.320126	1.25072
NP_726062.2	CG9485	CG9485, isoform B [Drosophila melanogaster]	22	1629	1.604	0.0575738	0.681674	1.23977
NP_001285121.1	Gs2	glutamine synthetase 2, isoform D [Drosophila melanogaster]	18	373	1.561	0.0580616	0.642471	1.23611
NP_648064.1	CG10075	uncharacterized protein Dmel_CG10075 [Drosophila melanogaster]	6	259	0.373	0.0582067	-1.42275	1.23503
NP_610184.2	Gp210	glycoprotein 210 kDa, isoform A [Drosophila melanogaster]	23	1876	0.584	0.0584649	-0.77596	1.2331
NP_524647.2	sif	still life, isoform A [Drosophila melanogaster]	13	2052	2.846	0.0584973	1.50894	1.23286
NP_609934.3	Ttc19	tetratricopeptide repeat domain 19 [Drosophila melanogaster]	4	369	0.285	0.0587466	-1.81097	1.23102
NP_610910.1	CG6543	CG6543, isoform A [Drosophila melanogaster]	15	295	0.512	0.0587604	-0.965784	1.23092
NP_001188957.1	CG44242	uncharacterized protein Dmel_CG44242, isoform B [Drosophila melanogaster]	7	80	0.442	0.0593691	-1.17788	1.22644
NP_001260305.1	CG4594	CG4594, isoform B [Drosophila melanogaster]	2	280	0.486	0.0597362	-1.04097	1.22376
NP_648957.1	CG7724	CG7724 [Drosophila melanogaster]	2	398	1.836	0.0597854	0.876566	1.2234
NP_724562.2	Aldh-III	aldehyde dehydrogenase type III, isoform Q [Drosophila melanogaster]	29	564	1.388	0.0600587	0.473008	1.22142
NP_524318.1	mRpL40	mitochondrial ribosomal protein L40 [Drosophila melanogaster]	8	196	0.433	0.0604547	-1.20756	1.21857
NP_001286796.1	SERCA	Sarco/endoplasmic reticulum Ca(2+)-ATPase, isoform I [Drosophila melanogaster]	2	999	1.658	0.0605528	0.729444	1.21787
NP_523419.1	Rab10	Rab10 [Drosophila melanogaster]	7	204	1.238	0.0606364	0.308011	1.21727
NP_649579.2	CG1236	CG1236 [Drosophila melanogaster]	9	347	1.801	0.060765	0.848798	1.21635
NP_524380.1	mRpS33	mitochondrial ribosomal protein S33 [Drosophila melanogaster]	2	113	0.338	0.060914	-1.5649	1.21528
NP_728614.1	Psa	puromycin sensitive aminopeptidase, isoform C [Drosophila melanogaster]	34	1075	1.569	0.0609371	0.649845	1.21512
NP_523837.2	gek	genghis khan [Drosophila melanogaster]	4	1637	1.777	0.0611328	0.829444	1.21373
NP_523870.2	mRpL17	mitochondrial ribosomal protein L17, isoform A [Drosophila melanogaster]	6	176	0.497	0.0612543	-1.00868	1.21286
NP_523765.1	Fen1	flap endonuclease 1 [Drosophila melanogaster]	2	385	0.554	0.0614735	-0.852042	1.21131
NP_649118.1	CG9451	CG9451, isoform A [Drosophila melanogaster]	3	410	0.558	0.0621567	-0.841663	1.20651
NP_649560.1	RpL13A	ribosomal protein L13A, isoform B [Drosophila melanogaster]	14	205	0.703	0.062183	-0.508403	1.20633
NP_001246793.1	CG4729	CG4729, isoform E [Drosophila melanogaster]	8	397	1.27	0.0628214	0.344828	1.20189
NP_726025.1	Treh	trehalase, isoform C [Drosophila melanogaster]	24	596	0.413	0.0628272	-1.27579	1.20185
NP_001259148.1	mRpL16	mitochondrial ribosomal protein L16, isoform B [Drosophila melanogaster]	6	243	0.586	0.0628867	-0.771027	1.20144
NP_732006.2	Tm1	tropomyosin 1, isoform E [Drosophila melanogaster]	3	711	1.815	0.0634255	0.85997	1.19774
NP_524104.2	mRpS34	mitochondrial ribosomal protein S34 [Drosophila melanogaster]	10	188	0.499	0.0636689	-1.00289	1.19607
NP_610953.1	CG8613	CG8613 [Drosophila melanogaster]	8	808	0.7	0.0639548	-0.514573	1.19413
NP_610254.1	CG30159	uncharacterized protein Dmel_CG30159, isoform A [Drosophila melanogaster]	15	239	0.482	0.0640289	-1.05289	1.19362
NP_723319.1	LanB1	LanB1, isoform B [Drosophila melanogaster]	29	1788	1.855	0.0655318	0.891419	1.18355
NP_524303.2	Irp-1B	iron regulatory protein 1B [Drosophila melanogaster]	23	899	1.932	0.0669651	0.950095	1.17415
NP_787987.1	Rtnl1	Reticulon-like1, isoform A [Drosophila melanogaster]	1	222	0.393	0.0677603	-1.3474	1.16902
NP_001097746.1	cu	curled, isoform D [Drosophila melanogaster]	6	642	1.283	0.0685471	0.359521	1.16401
NP_001259982.1	SerRS	Seryl-tRNA synthetase, isoform B [Drosophila melanogaster]	15	501	1.369	0.0692834	0.453122	1.15937
NP_733286.1	Cnx99A	calnexin 99A, isoform A [Drosophila melanogaster]	6	605	1.653	0.0694012	0.725087	1.15863
NP_649413.3	CG11241	uncharacterized protein Dmel_CG11241, isoform A [Drosophila melanogaster]	4	508	0.32	0.0694146	-1.64386	1.15855
NP_726992.2	spoon	spoonbill, isoform C [Drosophila melanogaster]	10	607	1.847	0.0699114	0.885184	1.15545
NP_730974.1	CG31548	uncharacterized protein Dmel_CG31548 [Drosophila melanogaster]	9	256	0.586	0.0708381	-0.771027	1.14973
NP_727371.1	CG9691	CG9691, isoform B [Drosophila melanogaster]	10	121	2.978	0.0710466	1.57434	1.14846
NP_731527.1	Tpc1	thiamine pyrophosphate carrier protein 1, isoform B [Drosophila melanogaster]	8	332	1.645	0.0718871	0.718088	1.14335
NP_728141.1	wupA	wings up A, isoform A [Drosophila melanogaster]	11	208	2.02	0.0722186	1.01436	1.14135
NP_523673.1	mRpL42	mitochondrial ribosomal protein L42, isoform A [Drosophila melanogaster]	4	124	0.597	0.0722624	-0.744197	1.14109
NP_001097685.2	Cdep	Chondrocyte-derived ezrin-like domain containing protein, isoform G [Drosophila melanogaster]	54	4273	2.249	0.0726757	1.16928	1.13861
NP_523899.1	Hsp83	heat shock protein 83, isoform A [Drosophila melanogaster]	58	717	2.029	0.0728694	1.02077	1.13745
NP_477369.1	TER94	TER94, isoform A [Drosophila melanogaster]	2	801	2.701	0.0732604	1.43349	1.13513
NP_524400.2	P5cr	pyrroline 5-carboyxlate reductase [Drosophila melanogaster]	2	280	1.831	0.0734512	0.872632	1.134
NP_610629.1	ND-B14	NADH dehydrogenase (ubiquinone) B14 subunit, isoform A [Drosophila melanogaster]	4	124	0.179	0.0735974	-2.48197	1.13314
NP_608884.1	Scox	synthesis of cytochrome c oxidase [Drosophila melanogaster]	12	251	0.597	0.0736639	-0.744197	1.13275
NP_001285513.1	CG34120	uncharacterized protein Dmel_CG34120, isoform E [Drosophila melanogaster]	21	1998	1.617	0.0737912	0.69332	1.132
NP_001246276.1	Cam	calmodulin, isoform C [Drosophila melanogaster]	4	149	0.403	0.0740652	-1.31115	1.13039
NP_001259446.1	dlg1	discs large 1, isoform R [Drosophila melanogaster]	1	1001	2.868	0.0745265	1.52005	1.12769
NP_731596.1	Jupiter	jupiter, isoform A [Drosophila melanogaster]	1	197	2.359	0.0747048	1.23818	1.12665
NP_726315.1	CG13551	uncharacterized protein Dmel_CG13551, isoform B [Drosophila melanogaster]	11	107	0.21	0.0752469	-2.25154	1.12351
NP_652604.2	c12.2	c12.2, isoform A [Drosophila melanogaster]	22	1386	0.693	0.0752543	-0.529073	1.12347
NP_609322.1	CG4598	CG4598, isoform A [Drosophila melanogaster]	13	281	0.509	0.0764657	-0.974262	1.11653
NP_524106.3	fax	failed axon connections, isoform A [Drosophila melanogaster]	40	418	3.38	0.077242	1.75702	1.11215
NP_730695.1	P5CDh1	delta-1-Pyrroline-5-carboxylate dehydrogenase 1, isoform A [Drosophila melanogaster]	49	574	0.697	0.0773096	-0.520769	1.11177
NP_648451.1	Plod	procollagen lysyl hydroxylase, isoform A [Drosophila melanogaster]	18	721	2.19	0.0773952	1.13093	1.11129
NP_542445.1	Gapdh2	glyceraldehyde 3 phosphate dehydrogenase 2, isoform A [Drosophila melanogaster]	8	332	1.428	0.0785011	0.513996	1.10512
NP_610313.1	mRpL52	mitochondrial ribosomal protein L52 [Drosophila melanogaster]	5	126	0.096	0.0785087	-3.38082	1.10508
NP_524444.3	Mitofilin	mitofilin, isoform C [Drosophila melanogaster]	2	739	0.698	0.0786065	-0.518701	1.10454
NP_001245813.1	galectin	galectin, isoform D [Drosophila melanogaster]	2	401	2.417	0.078618	1.27322	1.10448
NP_524367.1	Act88F	actin 88F [Drosophila melanogaster]	3	376	1.498	0.0796845	0.583038	1.09863
NP_608890.1	CG8891	CG8891 [Drosophila melanogaster]	6	191	0.631	0.0797245	-0.664288	1.09841
NP_611063.1	Gpo-1	glycerophosphate oxidase-1, isoform C [Drosophila melanogaster]	71	724	0.63	0.0797759	-0.666576	1.09813
NP_001014475.1	nrv2	nervana 2, isoform F [Drosophila melanogaster]	3	323	1.629	0.08035	0.703987	1.09501
NP_648327.1	path	pathetic, isoform A [Drosophila melanogaster]	9	471	1.965	0.0807076	0.974529	1.09309
NP_725653.1	GstS1	glutathione S transferase S1, isoform A [Drosophila melanogaster]	3	249	2.429	0.0817045	1.28036	1.08775
NP_524470.4	Gdh	glutamate dehydrogenase, isoform A [Drosophila melanogaster]	3	562	1.318	0.0822632	0.39835	1.08479
NP_648605.1	CG10960	uncharacterized protein Dmel_CG10960, isoform B [Drosophila melanogaster]	8	539	1.269	0.0826228	0.343692	1.0829
NP_609118.1	muc	midline uncoordinated, isoform B [Drosophila melanogaster]	28	512	0.526	0.0835848	-0.926865	1.07787
NP_001097432.1	CG34424	uncharacterized protein Dmel_CG34424, isoform A [Drosophila melanogaster]	4	201	1.497	0.0837947	0.582074	1.07678
NP_001027401.1	CG18003	uncharacterized protein Dmel_CG18003 [Drosophila melanogaster]	13	366	2.352	0.0842518	1.23389	1.07442
NP_648100.2	CG8607	CG8607 [Drosophila melanogaster]	7	275	0.319	0.0842732	-1.64837	1.07431
NP_651718.1	CIA30	complex I intermediate-associated protein, 30 kDa [Drosophila melanogaster]	5	296	0.698	0.0850132	-0.518701	1.07051
NP_524185.1	mRpL15	mitochondrial ribosomal protein L15 [Drosophila melanogaster]	15	286	0.563	0.0851496	-0.828793	1.06982
NP_001287138.1	CG10585	uncharacterized protein Dmel_CG10585, isoform B [Drosophila melanogaster]	4	448	1.144	0.0856576	0.194087	1.06723
NP_001261867.1	GlyRS	Glycyl-tRNA synthetase, isoform C [Drosophila melanogaster]	20	765	1.468	0.086903	0.553852	1.06097
NP_001189248.1	subdued	subdued, isoform D [Drosophila melanogaster]	2	1099	1.496	0.0912167	0.58111	1.03993
NP_611187.1	CG6984	CG6984 [Drosophila melanogaster]	6	285	0.682	0.0918911	-0.552156	1.03673
NP_477122.1	Mlp84B	muscle LIM protein at 84B, isoform A [Drosophila melanogaster]	7	495	1.736	0.0919405	0.795767	1.03649
NP_724110.1	RpS26	ribosomal protein S26, isoform C [Drosophila melanogaster]	4	114	1.42	0.0922501	0.505891	1.03503
NP_649812.2	CG8036	CG8036, isoform B [Drosophila melanogaster]	33	626	1.281	0.092579	0.35727	1.03349
NP_001027420.2	Zasp52	Z band alternatively spliced PDZ-motif protein 52, isoform F [Drosophila melanogaster]	6	2194	1.706	0.0927854	0.770618	1.03252
NP_610156.1	CG3107	CG3107, isoform A [Drosophila melanogaster]	21	1034	0.691	0.0929084	-0.533242	1.03194
NP_650423.1	Mf	myofilin, isoform B [Drosophila melanogaster]	2	365	1.966	0.0929716	0.975263	1.03165
NP_001286794.1	kcc	kazachoc, isoform F [Drosophila melanogaster]	2	1066	2.495	0.0929723	1.31904	1.03165
NP_651392.2	ND-49L	NADH dehydrogenase (ubiquinone) 49 kDa subunit-like [Drosophila melanogaster]	3	523	2.082	0.0930023	1.05797	1.03151
NP_725073.1	wal	walrus, isoform A [Drosophila melanogaster]	20	330	0.741	0.09303	-0.432455	1.03138
NP_730023.1	CTPsyn	CTP synthase, isoform A [Drosophila melanogaster]	4	627	1.612	0.0935442	0.688852	1.02898
NP_001246206.1	RyR	ryanodine receptor, isoform J [Drosophila melanogaster]	2	5115	1.661	0.0939275	0.732052	1.02721
NP_652307.1	CG12848	uncharacterized protein Dmel_CG12848, isoform A [Drosophila melanogaster]	3	120	0.412	0.0941628	-1.27928	1.02612
NP_477004.5	ChAT	choline acetyltransferase, isoform A [Drosophila melanogaster]	10	721	1.496	0.0942549	0.58111	1.0257
NP_001163538.1	lap	like-AP180, isoform D [Drosophila melanogaster]	4	788	2.631	0.0943774	1.39561	1.02513
NP_001261304.1	sls	sallimus, isoform P [Drosophila melanogaster]	102	18468	1.458	0.0949375	0.543991	1.02256
NP_525081.1	Hexo2	hexosaminidase 2 [Drosophila melanogaster]	16	622	1.327	0.0956144	0.408168	1.01948
NP_524210.1	Act79B	actin 79B, isoform A [Drosophila melanogaster]	6	376	1.33	0.0957489	0.411426	1.01887
NP_477485.1	Actn	alpha actinin, isoform C [Drosophila melanogaster]	39	917	1.48	0.0960229	0.565597	1.01763
NP_724495.2	Eb1	Eb1, isoform F [Drosophila melanogaster]	3	297	1.456	0.0963627	0.54201	1.01609
NP_726309.3	Rpi	Ribose-5-phosphate isomerase, isoform B [Drosophila melanogaster]	4	241	0.552	0.0968509	-0.85726	1.0139
NP_001285142.1	sicily	severe impairment of CI with lengthened youth, isoform B [Drosophila melanogaster]	9	334	0.574	0.0973209	-0.800877	1.01179
NP_649250.2	CG4042	CG4042, isoform A [Drosophila melanogaster]	5	284	0.684	0.0975673	-0.547932	1.0107
NP_726379.1	kcc	kazachoc, isoform B [Drosophila melanogaster]	3	1028	2.018	0.0978059	1.01293	1.00964
NP_648328.1	CG3408	CG3408, isoform A [Drosophila melanogaster]	4	331	2.119	0.0981569	1.08338	1.00808
NP_001014491.1	ref(2)P	refractory to sigma P, isoform B [Drosophila melanogaster]	13	599	2.085	0.0986441	1.06005	1.00593
NP_723596.1	Myo31DF	myosin 31DF, isoform B [Drosophila melanogaster]	27	1011	0.637	0.0992263	-0.650635	1.00337
NP_572707.4	GCS1	glucosidase 1, isoform B [Drosophila melanogaster]	19	849	1.242	0.100522	0.312665	0.997738
NP_610487.3	prel	preli-like, isoform B [Drosophila melanogaster]	3	236	1.657	0.100586	0.728574	0.997462
NP_728257.2	l(1)G0156	lethal (1) G0156, isoform C [Drosophila melanogaster]	1	354	2.367	0.101893	1.24306	0.991856
NP_524116.2	Su(P)	suppressor of ref(2)P sterility [Drosophila melanogaster]	13	417	0.445	0.101953	-1.16812	0.9916
NP_569913.1	Lrpprc2	Leucine-rich pentatricopeptide repeat containing 2 [Drosophila melanogaster]	10	1072	0.767	0.103364	-0.382702	0.985632
NP_570027.1	ttm50	tiny tim 50, isoform A [Drosophila melanogaster]	23	428	0.774	0.103673	-0.369595	0.984333
NP_724293.2	CG9331	CG9331, isoform A [Drosophila melanogaster]	25	364	0.791	0.103679	-0.33825	0.984311
NP_723090.1	Hel25E	helicase at 25E, isoform B [Drosophila melanogaster]	7	424	1.451	0.103854	0.537048	0.983577
NP_001189150.1	Pka-R1	protein kinase, cAMP-dependent, regulatory subunit type 1, isoform V [Drosophila melanogaster]	1	464	2.437	0.103888	1.28511	0.983436
NP_476750.1	sta	stubarista, isoform A [Drosophila melanogaster]	8	270	1.4	0.104078	0.485427	0.982641
NP_524597.1	Sap-r	Saposin-related, isoform A [Drosophila melanogaster]	13	953	0.38	0.104478	-1.39593	0.980977
NP_733371.1	PH4alphaEFB	prolyl-4-hydroxylase-alpha EFB [Drosophila melanogaster]	16	550	2.017	0.104576	1.01221	0.980569
NP_572826.1	ade5	ade5, isoform A [Drosophila melanogaster]	20	429	2.009	0.104814	1.00648	0.97958
NP_652626.1	Ugt86Da	Ugt86Da [Drosophila melanogaster]	16	528	1.595	0.104976	0.673556	0.978911
NP_609496.1	CG6287	CG6287 [Drosophila melanogaster]	20	332	1.262	0.105177	0.335712	0.978078
NP_648983.1	QIL1	QIL1 [Drosophila melanogaster]	12	122	0.481	0.105802	-1.05589	0.975504
NP_569970.2	moody	moody, isoform A [Drosophila melanogaster]	1	670	2.341	0.106441	1.22712	0.972892
NP_609397.2	CG5355	CG5355 [Drosophila melanogaster]	35	756	1.277	0.106906	0.352759	0.971
NP_001163095.1	Pkn	protein kinase N, isoform H [Drosophila melanogaster]	7	1284	2.121	0.107428	1.08474	0.968884
NP_001027219.1	GlyP	glycogen phosphorylase, isoform B [Drosophila melanogaster]	46	844	2.084	0.107474	1.05936	0.968698
NP_001260427.1	Tor	target of rapamycin, isoform B [Drosophila melanogaster]	21	2471	1.558	0.108265	0.639695	0.965512
NP_001137723.2	CG42672	uncharacterized protein Dmel_CG42672, isoform J [Drosophila melanogaster]	1	1500	1.653	0.10897	0.725087	0.962692
NP_649894.1	GstZ1	glutathione S transferase Z1 [Drosophila melanogaster]	2	246	0.223	0.109858	-2.16488	0.959169
NP_651330.1	veli	veli, isoform A [Drosophila melanogaster]	13	195	1.624	0.110074	0.699552	0.958316
NP_650840.1	Arc42	Arc42 [Drosophila melanogaster]	13	405	0.673	0.110152	-0.571322	0.958009
NP_728423.1	slgA	sluggish A, isoform D [Drosophila melanogaster]	1	681	0.421	0.110768	-1.24811	0.955587
NP_608544.1	Dbp21E2	DEAD box protein 21E2 [Drosophila melanogaster]	4	536	0.712	0.112393	-0.490051	0.949262
NP_610092.2	CG9249	CG9249, isoform A [Drosophila melanogaster]	6	310	0.677	0.113347	-0.562772	0.94559
NP_650443.2	l(3)neo43	lethal (3) neo43, isoform B [Drosophila melanogaster]	2	81	0.28	0.115533	-1.8365	0.937295
NP_573176.1	DENR	density regulated protein, isoform A [Drosophila melanogaster]	3	189	2.251	0.115906	1.17057	0.935895
NP_733244.5	larp	La related protein, isoform D [Drosophila melanogaster]	35	1673	1.904	0.117953	0.929033	0.92829
NP_524816.1	Lsp2	larval serum protein 2, isoform A [Drosophila melanogaster]	18	701	2.326	0.118235	1.21785	0.927255
NP_611264.2	CG5009	CG5009 [Drosophila melanogaster]	36	669	1.6	0.11917	0.678072	0.923833
NP_523836.2	Adk2	adenylate kinase 2 [Drosophila melanogaster]	28	240	0.57	0.119355	-0.810966	0.923161
NP_001285261.1	Lsd-2	lipid storage droplet-2, isoform E [Drosophila melanogaster]	1	335	1.705	0.120507	0.769772	0.918987
NP_651578.1	CG5590	CG5590 [Drosophila melanogaster]	23	412	1.79	0.121021	0.83996	0.917141
NP_001163278.2	Pde8	phosphodiesterase 8, isoform N [Drosophila melanogaster]	2	949	2.323	0.121445	1.21599	0.91562
NP_788764.1	Tpi	triose phosphate isomerase, isoform A [Drosophila melanogaster]	18	348	0.593	0.121488	-0.753896	0.915466
NP_724594.1	CG30493	uncharacterized protein Dmel_CG30493 [Drosophila melanogaster]	10	326	0.534	0.122181	-0.905088	0.912996
NP_650283.1	Droj2	DnaJ-like-2, isoform A [Drosophila melanogaster]	23	403	1.52	0.122441	0.604071	0.912075
NP_651795.2	aralar1	aralar1, isoform A [Drosophila melanogaster]	2	682	0.567	0.12299	-0.818579	0.91013
NP_001137633.1	Syb	synaptobrevin, isoform C [Drosophila melanogaster]	12	152	1.504	0.123699	0.588805	0.907632
NP_609329.3	CG4619	CG4619, isoform A [Drosophila melanogaster]	8	570	0.567	0.124838	-0.818579	0.903652
NP_524586.1	Mlc2	myosin light chain 2 [Drosophila melanogaster]	14	222	1.881	0.125099	0.9115	0.902746
NP_648511.2	CG14130	uncharacterized protein Dmel_CG14130 [Drosophila melanogaster]	2	255	0.474	0.125336	-1.07704	0.901925
NP_651867.2	PNPase	polynucleotide phosphorylase, isoform A [Drosophila melanogaster]	7	771	0.548	0.125469	-0.867752	0.901462
NP_001246418.1	CG11961	uncharacterized protein Dmel_CG11961, isoform C [Drosophila melanogaster]	2	891	0.551	0.125709	-0.859876	0.900634
NP_648239.1	CG6638	CG6638 [Drosophila melanogaster]	12	420	0.741	0.125844	-0.432455	0.900166
NP_476985.1	ox	oxen [Drosophila melanogaster]	3	55	0.469	0.125878	-1.09234	0.900049
NP_995893.1	par-1	par-1, isoform H [Drosophila melanogaster]	7	993	2.999	0.126066	1.58448	0.899401
NP_727450.1	sesB	stress-sensitive B, isoform B [Drosophila melanogaster]	34	299	0.419	0.126169	-1.25498	0.899047
NP_001262585.1	Mf	myofilin, isoform O [Drosophila melanogaster]	3	310	1.978	0.127281	0.984042	0.895237
NP_001245946.1	Glt	glutactin, isoform D [Drosophila melanogaster]	21	1026	1.264	0.127283	0.337996	0.89523
NP_511138.2	Lsp1alpha	larval serum protein 1 alpha [Drosophila melanogaster]	2	816	3.945	0.127548	1.98003	0.894325
NP_001137910.2	Idh	isocitrate dehydrogenase, isoform K [Drosophila melanogaster]	33	479	1.408	0.128196	0.493647	0.892126
NP_599137.1	Rab11	Rab11, isoform A [Drosophila melanogaster]	9	214	0.525	0.129013	-0.929611	0.889368
NP_730248.2	CG6512	CG6512, isoform A [Drosophila melanogaster]	59	826	0.765	0.129961	-0.386468	0.886187
NP_524053.2	RpS4	ribosomal protein S4, isoform B [Drosophila melanogaster]	14	261	1.506	0.130395	0.590722	0.88474
NP_651930.2	Gat	GABA transporter, isoform A [Drosophila melanogaster]	12	636	1.608	0.130769	0.685267	0.883495
NP_001163129.1	GLS	glutaminase, isoform H [Drosophila melanogaster]	6	775	1.931	0.130968	0.949348	0.882834
NP_524252.2	lap	like-AP180, isoform A [Drosophila melanogaster]	2	468	1.916	0.132889	0.938098	0.876511
NP_001188562.1	CG15347	uncharacterized protein Dmel_CG15347, isoform B [Drosophila melanogaster]	5	229	0.685	0.133874	-0.545824	0.873303
NP_608616.2	CG31937	uncharacterized protein Dmel_CG31937 [Drosophila melanogaster]	5	321	1.241	0.134473	0.311503	0.871366
NP_722910.2	pgant4	polypeptide GalNAc transferase 4, isoform C [Drosophila melanogaster]	12	644	0.738	0.135064	-0.438307	0.869461
NP_651959.1	Men-b	malic enzyme b, isoform A [Drosophila melanogaster]	2	617	1.834	0.135142	0.874994	0.869208
NP_649989.1	CG3999	CG3999, isoform A [Drosophila melanogaster]	17	985	1.471	0.135506	0.556797	0.868042
NP_523827.1	l(2)efl	lethal (2) essential for life, isoform A [Drosophila melanogaster]	11	187	1.964	0.135685	0.973795	0.867469
NP_524100.1	mRpS31	mitochondrial ribosomal protein S31 [Drosophila melanogaster]	15	376	0.47	0.137286	-1.08927	0.862375
NP_733332.1	Acph-1	acid phosphatase 1, isoform B [Drosophila melanogaster]	8	455	0.632	0.137345	-0.662004	0.862186
NP_573057.1	CG9281	CG9281, isoform B [Drosophila melanogaster]	15	611	1.476	0.137846	0.561693	0.860607
NP_611853.2	CG2970	CG2970, isoform A [Drosophila melanogaster]	26	366	0.602	0.138111	-0.732165	0.859772
NP_727374.1	Idgf4	imaginal disc growth factor 4, isoform B [Drosophila melanogaster]	26	442	2.33	0.138453	1.22033	0.858699
NP_001015354.3	CG17691	uncharacterized protein Dmel_CG17691, isoform E [Drosophila melanogaster]	2	364	0.678	0.13882	-0.560643	0.85755
NP_524708.1	Acon	aconitase, isoform B [Drosophila melanogaster]	58	787	0.754	0.138842	-0.407364	0.857479
NP_476779.1	Uro	urate oxidase [Drosophila melanogaster]	21	352	0.719	0.139973	-0.475936	0.853956
NP_724345.1	His3:CG31613	histone H3 [Drosophila melanogaster]	2	136	0.313	0.140489	-1.67577	0.852356
NP_611243.1	P32	P32 [Drosophila melanogaster]	7	263	0.482	0.14065	-1.05289	0.851859
NP_001247319.1	scrib	scribbled, isoform N [Drosophila melanogaster]	5	2554	2.11	0.14207	1.07724	0.847497
NP_611353.1	CG5482	CG5482, isoform A [Drosophila melanogaster]	25	397	1.585	0.142684	0.664483	0.845624
NP_996217.1	Tm1	tropomyosin 1, isoform K [Drosophila melanogaster]	3	518	1.999	0.14319	0.999278	0.844088
NP_608615.1	Rim2	replication in mitochondria 2, isoform A [Drosophila melanogaster]	7	365	1.342	0.143381	0.424385	0.843509
NP_001285263.1	CG33178	uncharacterized protein Dmel_CG33178, isoform B [Drosophila melanogaster]	3	177	1.175	0.143397	0.232661	0.843461
NP_511152.2	mRpL38	mitochondrial ribosomal protein L38 [Drosophila melanogaster]	20	416	0.528	0.143421	-0.92139	0.843387
NP_650880.2	Sirt2	sirtuin 2, isoform A [Drosophila melanogaster]	4	355	1.691	0.143839	0.757877	0.842123
NP_001246757.1	Mpcp	mitochondrial phosphate carrier protein, isoform C [Drosophila melanogaster]	18	356	0.623	0.145375	-0.682696	0.837511
NP_725047.2	CG30022	uncharacterized protein Dmel_CG30022 [Drosophila melanogaster]	11	279	0.829	0.145558	-0.270556	0.836964
NP_649333.1	CRIF	CR6-interacting factor [Drosophila melanogaster]	12	232	0.588	0.146819	-0.766112	0.833217
NP_001259867.1	NLaz	neural lazarillo, isoform B [Drosophila melanogaster]	7	245	1.821	0.147054	0.864731	0.832523
NP_651684.1	Cisd2	CDGSH iron sulfur domain 2 [Drosophila melanogaster]	4	133	0.65	0.148178	-0.621488	0.829217
NP_001097610.1	CG12355	uncharacterized protein Dmel_CG12355, isoform B [Drosophila melanogaster]	2	204	0.662	0.14858	-0.595097	0.828038
NP_001285012.1	sni	sniffer, isoform B [Drosophila melanogaster]	8	247	0.536	0.148636	-0.899695	0.827876
NP_524674.1	Hex-C	hexokinase C [Drosophila melanogaster]	9	454	0.669	0.149604	-0.579922	0.825057
NP_728910.1	mge	maggie, isoform B [Drosophila melanogaster]	1	122	2.2	0.150977	1.1375	0.82109
NP_001262163.1	Glg1	golgi complex-localized glycoprotein 1, isoform B [Drosophila melanogaster]	15	1107	0.746	0.151197	-0.422752	0.820457
NP_001259693.1	CG7322	CG7322, isoform B [Drosophila melanogaster]	5	242	1.287	0.151756	0.364012	0.818853
NP_648572.1	Ncc69	sodium chloride cotransporter 69, isoform A [Drosophila melanogaster]	1	1171	2.382	0.151833	1.25217	0.818634
NP_648514.1	RpL10Ab	ribosomal protein L10Ab, isoform A [Drosophila melanogaster]	13	217	0.759	0.154346	-0.397828	0.811506
NP_730435.2	Lon	Lon protease, isoform C [Drosophila melanogaster]	2	1024	1.602	0.156262	0.679874	0.806147
NP_001162742.1	up	upheld, isoform I [Drosophila melanogaster]	4	397	1.788	0.157228	0.838347	0.803469
NP_612021.1	Tudor-SN	tudor staphylococcal nuclease, isoform A [Drosophila melanogaster]	47	926	1.187	0.157263	0.24732	0.803373
NP_477380.1	Fpps	farnesyl pyrophosphate synthase [Drosophila melanogaster]	4	419	0.507	0.157628	-0.979942	0.802367
NP_001259705.1	l(1)G0156	lethal (1) G0156, isoform D [Drosophila melanogaster]	2	377	1.913	0.157968	0.935837	0.80143
NP_001261450.1	S6k	ribosomal protein S6 kinase, isoform B [Drosophila melanogaster]	3	490	2.117	0.158241	1.08202	0.800682
NP_001284928.1	sqh	spaghetti squash, isoform B [Drosophila melanogaster]	3	174	0.382	0.159457	-1.38836	0.797358
NP_609093.1	MME1	mitochondrial magnesium exporter 1 [Drosophila melanogaster]	2	299	1.85	0.160075	0.887525	0.795678
NP_730944.2	Pi4KIIalpha	Pi4KIIalpha, isoform A [Drosophila melanogaster]	11	710	1.462	0.161439	0.547943	0.791992
NP_572988.1	pdgy	pudgy, isoform A [Drosophila melanogaster]	22	597	1.367	0.161778	0.451013	0.791081
NP_523528.1	yip2	yippee interacting protein 2 [Drosophila melanogaster]	29	398	0.813	0.162433	-0.298673	0.789325
NP_001259193.1	sgg	shaggy, isoform Q [Drosophila melanogaster]	2	1168	2.354	0.162441	1.23511	0.789306
NP_651391.1	tobi	target of brain insulin [Drosophila melanogaster]	23	657	2.499	0.163248	1.32135	0.787153
NP_524655.1	Gk1	glycerol kinase 1, isoform A [Drosophila melanogaster]	11	538	0.691	0.164742	-0.533242	0.783196
NP_724181.1	CG17544	uncharacterized protein Dmel_CG17544, isoform C [Drosophila melanogaster]	23	693	0.605	0.165168	-0.724993	0.782074
NP_476687.1	Ptp61F	protein tyrosine phosphatase 61F, isoform A [Drosophila melanogaster]	11	548	1.196	0.165211	0.258217	0.781961
NP_726377.1	kcc	kazachoc, isoform D [Drosophila melanogaster]	1	1074	2.194	0.165382	1.13356	0.781513
NP_001285625.1	CG14022	uncharacterized protein Dmel_CG14022, isoform B [Drosophila melanogaster]	3	101	0.607	0.165978	-0.720232	0.779949
NP_477437.1	Vha13	vacuolar H[+] ATPase 13kD subunit, isoform A [Drosophila melanogaster]	8	117	0.253	0.166702	-1.98279	0.77806
NP_523800.1	Act57B	actin 57B [Drosophila melanogaster]	5	376	1.689	0.167265	0.756169	0.776594
NP_732013.2	Tm2	tropomyosin 2, isoform C [Drosophila melanogaster]	2	284	1.811	0.168117	0.856787	0.774388
NP_649757.1	CG2767	CG2767 [Drosophila melanogaster]	21	329	1.186	0.168303	0.246104	0.773908
NP_001027109.2	Pmi	Pmi, isoform D [Drosophila melanogaster]	6	182	0.569	0.169013	-0.813499	0.772079
NP_611540.1	CG15653	uncharacterized protein Dmel_CG15653 [Drosophila melanogaster]	3	170	1.54	0.169299	0.62293	0.771346
NP_609490.1	CG6230	CG6230 [Drosophila melanogaster]	24	1225	1.195	0.169314	0.257011	0.771307
NP_732958.1	Slimp	Seryl-tRNA synthetase-like insect mitochondrial protein [Drosophila melanogaster]	3	464	1.544	0.169697	0.626673	0.770326
NP_648111.1	Sec63	secretory 63 [Drosophila melanogaster]	16	753	1.193	0.17092	0.254594	0.767206
NP_524365.1	SerRS-m	Seryl-tRNA synthetase, mitochondrial, isoform A [Drosophila melanogaster]	6	417	0.698	0.171928	-0.518701	0.764654
NP_611263.1	Sardh	sarcosine dehydrogenase [Drosophila melanogaster]	5	894	1.579	0.173777	0.659011	0.760009
NP_648235.1	se	sepia [Drosophila melanogaster]	7	243	0.405	0.17503	-1.30401	0.756886
NP_648236.1	GstO2	glutathione S transferase O2, isoform B [Drosophila melanogaster]	12	250	0.825	0.176094	-0.277534	0.754255
NP_652351.1	CG15386	uncharacterized protein Dmel_CG15386 [Drosophila melanogaster]	5	77	0.667	0.176626	-0.584241	0.752946
NP_001261758.1	Ncc69	sodium chloride cotransporter 69, isoform E [Drosophila melanogaster]	2	1207	1.602	0.176636	0.679874	0.75292
NP_001260335.1	CG33303	uncharacterized protein Dmel_CG33303, isoform B [Drosophila melanogaster]	19	458	1.241	0.177555	0.311503	0.750666
NP_649463.2	CG9855	CG9855, isoform A [Drosophila melanogaster]	3	382	1.065	0.178293	0.0908534	0.748865
NP_523687.1	Rab3	Rab3 [Drosophila melanogaster]	4	220	1.326	0.180178	0.407081	0.744299
NP_523860.2	zip	zipper, isoform A [Drosophila melanogaster]	4	2056	1.997	0.180785	0.997834	0.742838
NP_727202.1	2020-12-01	defective chorion 1, isoform B [Drosophila melanogaster]	2	1208	0.184	0.181216	-2.44222	0.741803
NP_611119.1	CG7997	CG7997, isoform A [Drosophila melanogaster]	11	417	1.501	0.181329	0.585924	0.741534
NP_730957.1	Vha26	vacuolar H[+]-ATPase 26kD subunit, isoform A [Drosophila melanogaster]	24	226	0.368	0.181628	-1.44222	0.740818
NP_476640.1	Mlc1	myosin alkali light chain 1, isoform B [Drosophila melanogaster]	5	155	1.371	0.182001	0.455229	0.739926
NP_477222.1	Surf4	surfeit 4 [Drosophila melanogaster]	6	270	1.326	0.182783	0.407081	0.738065
NP_651000.1	CG6439	CG6439, isoform A [Drosophila melanogaster]	19	370	1.374	0.184331	0.458382	0.734401
NP_001287641.1	Tim17b	translocase of the inner mitochondrial membrane 17b, isoform B [Drosophila melanogaster]	9	173	1.415	0.185481	0.500802	0.731701
NP_572974.1	CG14407	uncharacterized protein Dmel_CG14407 [Drosophila melanogaster]	7	159	0.519	0.185929	-0.946194	0.730652
NP_729118.1	Rcc1	regulator of chromosome condensation 1, isoform B [Drosophila melanogaster]	20	547	0.522	0.188424	-0.937878	0.724863
NP_648121.1	Rac2	Rac2, isoform A [Drosophila melanogaster]	4	192	1.354	0.188972	0.437228	0.723603
NP_523375.2	mbt	mushroom bodies tiny [Drosophila melanogaster]	3	639	1.804	0.191085	0.851199	0.718774
NP_523463.2	Prx6005	peroxiredoxin 6005 [Drosophila melanogaster]	8	222	1.249	0.191827	0.320773	0.717091
NP_647985.1	Ppat-Dpck	bifunctional phosphopantetheine adenylyltransferase - Dephospho-CoA kinase [Drosophila melanogaster]	10	518	1.398	0.191888	0.483364	0.716953
NP_652045.1	CG13397	uncharacterized protein Dmel_CG13397, isoform A [Drosophila melanogaster]	4	778	0.709	0.194571	-0.496142	0.710921
NP_001137835.2	Irk3	inwardly rectifying potassium channel 3, isoform D [Drosophila melanogaster]	1	446	2.065	0.195292	1.04614	0.709316
NP_650047.3	SdhC	succinate dehydrogenase, subunit C, isoform A [Drosophila melanogaster]	7	171	0.598	0.19574	-0.741783	0.708321
NP_610939.2	RpS23	ribosomal protein S23, isoform A [Drosophila melanogaster]	9	143	1.424	0.197193	0.509949	0.705109
NP_001286058.1	Irk3	inwardly rectifying potassium channel 3, isoform C [Drosophila melanogaster]	1	205	8.876	0.197223	3.14991	0.705041
NP_650142.1	Ect3	Ectoderm-expressed 3 [Drosophila melanogaster]	9	637	1.479	0.199459	0.564622	0.700147
NP_001097705.1	CG17816	uncharacterized protein Dmel_CG17816, isoform E [Drosophila melanogaster]	2	855	2.243	0.201403	1.16543	0.695933
NP_731635.2	ClC-a	chloride channel-a, isoform A [Drosophila melanogaster]	9	1176	1.457	0.201907	0.543001	0.694848
NP_524182.3	Ide	insulin degrading metalloproteinase [Drosophila melanogaster]	21	990	1.189	0.205737	0.249749	0.686688
NP_649568.1	elm	ethanol sensitive with low memory, isoform A [Drosophila melanogaster]	4	189	0.461	0.207759	-1.11716	0.68244
NP_476925.1	Sod2	superoxide dismutase 2 (Mn), isoform A [Drosophila melanogaster]	13	217	0.599	0.208611	-0.739372	0.680662
NP_651703.1	CG1907	CG1907 [Drosophila melanogaster]	18	317	0.691	0.208838	-0.533242	0.68019
NP_610914.2	CG16935	uncharacterized protein Dmel_CG16935, isoform A [Drosophila melanogaster]	16	357	0.64	0.209508	-0.643856	0.678799
NP_001162992.1	Mhc	myosin heavy chain, isoform P [Drosophila melanogaster]	1	1949	0.514	0.211475	-0.96016	0.674741
NP_001260290.1	Aldh	aldehyde dehydrogenase, isoform B [Drosophila melanogaster]	27	520	0.671	0.212729	-0.575615	0.672173
NP_608886.1	CG14043	uncharacterized protein Dmel_CG14043 [Drosophila melanogaster]	2	600	1.453	0.213161	0.539035	0.671292
NP_001096870.1	sgg	shaggy, isoform M [Drosophila melanogaster]	1	772	1.887	0.21433	0.916094	0.668917
NP_001246630.1	axo	axotactin, isoform B [Drosophila melanogaster]	2	2148	1.906	0.215845	0.930548	0.665859
NP_001247221.1	Mvl	malvolio, isoform G [Drosophila melanogaster]	1	607	2.879	0.215932	1.52557	0.665682
NP_729528.2	CG6767	CG6767, isoform B [Drosophila melanogaster]	4	388	1.622	0.217512	0.697774	0.662517
NP_523396.1	scu	scully, isoform A [Drosophila melanogaster]	16	255	0.799	0.218125	-0.323733	0.661294
NP_001245732.1	wupA	wings up A, isoform H [Drosophila melanogaster]	12	260	1.927	0.218489	0.946357	0.66057
NP_649912.1	CG9396	CG9396 [Drosophila melanogaster]	2	151	0.612	0.219194	-0.708396	0.659171
NP_001246234.1	Pfk	phosphofructokinase, isoform D [Drosophila melanogaster]	14	950	1.702	0.220251	0.767231	0.657083
NP_001014738.2	up	upheld, isoform K [Drosophila melanogaster]	7	396	1.59	0.220698	0.669027	0.656202
NP_651967.2	COQ7	COQ7 [Drosophila melanogaster]	5	219	0.67	0.222077	-0.577767	0.653497
NP_523741.2	Hsc70-5	heat shock protein cognate 5, isoform A [Drosophila melanogaster]	77	686	1.302	0.223183	0.380729	0.65134
NP_731237.1	DppIII	dipeptidyl aminopeptidase III, isoform C [Drosophila melanogaster]	33	786	0.787	0.224961	-0.345564	0.647894
NP_001259536.2	CtsB1	cathepsin B1, isoform C [Drosophila melanogaster]	11	340	0.685	0.225568	-0.545824	0.646723
NP_001163664.1	CG4159	CG4159, isoform B [Drosophila melanogaster]	3	442	0.7	0.225652	-0.514573	0.646561
NP_995656.1	AlaRS	Alanyl-tRNA synthetase, isoform B [Drosophila melanogaster]	32	966	1.284	0.225758	0.360645	0.646358
NP_524051.1	mRpL20	mitochondrial ribosomal protein L20 [Drosophila melanogaster]	6	150	0.46	0.226769	-1.12029	0.644416
NP_524022.1	mRpL2	mitochondrial ribosomal protein L2 [Drosophila melanogaster]	12	294	0.719	0.227052	-0.475936	0.643874
NP_001162940.3	Fatp	fatty acid (long chain) transport protein, isoform F [Drosophila melanogaster]	28	746	1.53	0.228212	0.613532	0.641662
NP_524841.1	GlnRS	Glutaminyl-tRNA synthetase [Drosophila melanogaster]	16	778	1.393	0.230342	0.478195	0.637627
NP_731644.2	CG6950	CG6950, isoform C [Drosophila melanogaster]	8	450	0.83	0.230579	-0.268817	0.637179
NP_651251.3	CG18528	uncharacterized protein Dmel_CG18528 [Drosophila melanogaster]	5	493	1.517	0.230713	0.601221	0.636928
NP_476832.1	SERCA	Sarco/endoplasmic reticulum Ca(2+)-ATPase, isoform A [Drosophila melanogaster]	4	1002	1.653	0.231346	0.725087	0.635738
NP_611843.2	DNA-ligI	DNA ligase I [Drosophila melanogaster]	2	747	0.499	0.232691	-1.00289	0.63322
NP_523813.1	RpL23	ribosomal protein L23 [Drosophila melanogaster]	13	140	0.896	0.233517	-0.158429	0.631682
NP_610383.1	Mal-A7	maltase A7, isoform A [Drosophila melanogaster]	17	599	2.353	0.233675	1.2345	0.631389
NP_476801.1	Vha16-1	vacuolar H[+] ATPase 16kD subunit 1, isoform A [Drosophila melanogaster]	2	159	0.428	0.236612	-1.22432	0.625963
NP_524664.1	spag	spaghetti [Drosophila melanogaster]	6	534	2.082	0.239174	1.05797	0.621287
NP_788675.1	CG9297	CG9297, isoform A [Drosophila melanogaster]	28	930	1.94	0.239256	0.956057	0.621137
NP_001260919.1	Amph	amphiphysin, isoform B [Drosophila melanogaster]	2	502	1.477	0.24327	0.56267	0.613912
NP_729738.1	Bmcp	bmcp, isoform A [Drosophila melanogaster]	5	303	0.664	0.243615	-0.590745	0.613296
NP_610499.2	CG1814	CG1814, isoform A [Drosophila melanogaster]	9	548	0.764	0.244234	-0.388355	0.612194
NP_650348.1	MetRS-m	Methionyl-tRNA synthetase, mitochondrial, isoform A [Drosophila melanogaster]	5	582	0.716	0.245517	-0.481969	0.609919
NP_001163242.1	CG42497	uncharacterized protein Dmel_CG42497 [Drosophila melanogaster]	3	65	0.632	0.246469	-0.662004	0.608239
NP_610294.1	Cyt-b5	cytochrome b5, isoform B [Drosophila melanogaster]	3	134	0.52	0.247461	-0.943416	0.606492
NP_001036360.1	CG31731	uncharacterized protein Dmel_CG31731, isoform B [Drosophila melanogaster]	9	1597	1.669	0.250675	0.738984	0.60089
NP_650013.3	CG31272	uncharacterized protein Dmel_CG31272 [Drosophila melanogaster]	7	563	1.366	0.253661	0.449957	0.595746
NP_477432.3	Taz	tafazzin, isoform A [Drosophila melanogaster]	7	378	1.219	0.253875	0.285698	0.59538
NP_651987.1	Vha36-1	vacuolar H[+] ATPase 36kD subunit 1 [Drosophila melanogaster]	14	246	0.239	0.255088	-2.06492	0.59331
NP_725191.1	Galphaq	G protein alpha q subunit, isoform A [Drosophila melanogaster]	3	353	1.431	0.255543	0.517024	0.592535
NP_001036532.1	sns	sticks and stones, isoform B [Drosophila melanogaster]	2	1542	1.777	0.256687	0.829444	0.590596
NP_524479.1	Orct	organic cation transporter, isoform A [Drosophila melanogaster]	5	548	2.27	0.256995	1.18269	0.590076
NP_001261081.1	CG15099	uncharacterized protein Dmel_CG15099, isoform B [Drosophila melanogaster]	9	2683	1.758	0.257838	0.813935	0.588654
NP_725530.1	spin	spinster, isoform C [Drosophila melanogaster]	2	605	0.493	0.25819	-1.02034	0.588061
NP_723536.1	eEF1delta	eEF1delta, isoform A [Drosophila melanogaster]	1	229	0.361	0.258398	-1.46993	0.587711
NP_511161.2	Top1	topoisomerase 1, isoform A [Drosophila melanogaster]	14	974	0.671	0.258526	-0.575615	0.587496
NP_001260818.1	CG8080	CG8080, isoform E [Drosophila melanogaster]	7	413	1.301	0.259075	0.379621	0.586574
NP_001247036.1	SelR	selenoprotein R, isoform J [Drosophila melanogaster]	2	192	1.87	0.261327	0.903038	0.582816
NP_001027073.1	Shawn	shawn, isoform B [Drosophila melanogaster]	4	387	1.721	0.263341	0.783247	0.579481
NP_651247.1	CG6432	CG6432, isoform A [Drosophila melanogaster]	6	674	1.644	0.264935	0.71721	0.576861
NP_732093.1	Sap47	Synapse-associated protein 47kD, isoform G [Drosophila melanogaster]	5	535	1.628	0.265686	0.703101	0.575631
NP_001262777.1	Syp	syncrip, isoform J [Drosophila melanogaster]	3	761	1.477	0.26586	0.56267	0.575347
NP_524011.1	ATPsynB	ATP synthase, subunit B [Drosophila melanogaster]	24	243	0.337	0.266912	-1.56918	0.573632
NP_648509.1	CG10361	uncharacterized protein Dmel_CG10361 [Drosophila melanogaster]	4	417	1.449	0.268091	0.535058	0.571718
NP_649130.2	CG14100	uncharacterized protein Dmel_CG14100 [Drosophila melanogaster]	8	407	0.511	0.268757	-0.968605	0.57064
NP_650894.1	CG10877	uncharacterized protein Dmel_CG10877 [Drosophila melanogaster]	6	441	0.756	0.26912	-0.403542	0.570055
NP_001247301.1	RpS27	ribosomal protein S27, isoform B [Drosophila melanogaster]	6	84	1.821	0.269393	0.864731	0.569614
NP_001163012.2	l(2)37Cc	lethal (2) 37Cc, isoform D [Drosophila melanogaster]	27	276	0.725	0.270487	-0.463947	0.567854
NP_731825.1	sqd	squid, isoform B [Drosophila melanogaster]	11	344	1.481	0.272447	0.566572	0.564717
NP_573313.2	Rip11	Rab11 interacting protein, isoform A [Drosophila melanogaster]	4	832	1.617	0.273477	0.69332	0.563079
NP_611370.2	Cyp12b2	Cyp12b2 [Drosophila melanogaster]	9	535	0.843	0.273577	-0.246395	0.562921
NP_001260177.1	Ndae1	Na[+]-driven anion exchanger 1, isoform D [Drosophila melanogaster]	5	1134	1.546	0.274194	0.62854	0.561942
NP_728273.1	RpS10b	ribosomal protein S10b, isoform B [Drosophila melanogaster]	13	160	1.61	0.275186	0.687061	0.560374
NP_609150.2	LKRSDH	lysine ketoglutarate reductase/saccharopine dehydrogenase, isoform A [Drosophila melanogaster]	19	928	1.364	0.275571	0.447844	0.559767
NP_650822.1	CG6195	CG6195 [Drosophila melanogaster]	5	363	1.535	0.278745	0.618239	0.554793
NP_651094.2	CG17141	uncharacterized protein Dmel_CG17141 [Drosophila melanogaster]	2	323	0.703	0.278758	-0.508403	0.554773
NP_611693.1	RpS24	ribosomal protein S24 [Drosophila melanogaster]	5	131	1.439	0.278965	0.525067	0.554451
NP_649906.1	AP-1mu	adaptor protein complex 1, mu subunit [Drosophila melanogaster]	2	426	1.518	0.279993	0.602172	0.552853
NP_611376.1	CG15096	uncharacterized protein Dmel_CG15096, isoform A [Drosophila melanogaster]	2	491	0.405	0.282041	-1.30401	0.549688
NP_731737.1	Past1	putative achaete scute target 1, isoform A [Drosophila melanogaster]	36	540	1.632	0.285857	0.706641	0.543851
NP_525122.1	NitFhit	nitrilase and fragile histidine triad fusion protein [Drosophila melanogaster]	5	460	0.786	0.287013	-0.347399	0.542098
NP_001246677.1	CG43078	uncharacterized protein Dmel_CG43078, isoform G [Drosophila melanogaster]	9	2455	1.533	0.288698	0.616358	0.539556
NP_001014528.1	CG33506	uncharacterized protein Dmel_CG33506 [Drosophila melanogaster]	8	320	0.768	0.288915	-0.380822	0.53923
NP_511105.2	alpha-Man-Ia	alpha-Mannosidase class I a, isoform K [Drosophila melanogaster]	2	643	1.353	0.290212	0.436162	0.537284
NP_001260332.1	CG5045	CG5045, isoform B [Drosophila melanogaster]	7	253	0.779	0.290401	-0.360305	0.537003
NP_001189070.1	Ank2	ankyrin 2, isoform U [Drosophila melanogaster]	3	13559	1.793	0.290819	0.842375	0.536377
NP_651963.1	Sucb	sucb, isoform A [Drosophila melanogaster]	20	416	1.553	0.293589	0.635058	0.53226
NP_723992.1	VhaSFD	vacuolar H[+]-ATPase SFD subunit, isoform B [Drosophila melanogaster]	18	542	0.48	0.29436	-1.05889	0.531121
NP_001260163.1	nrv1	nervana 1, isoform B [Drosophila melanogaster]	17	309	0.901	0.294679	-0.150401	0.530651
NP_650782.1	Cyp12a5	Cyp12a5 [Drosophila melanogaster]	10	536	0.492	0.294936	-1.02327	0.530273
NP_001163064.1	l(2)01289	lethal (2) 01289, isoform G [Drosophila melanogaster]	1	1191	1.934	0.2951	0.951588	0.530031
NP_001163782.1	mesh	mesh, isoform D [Drosophila melanogaster]	35	1454	0.82	0.295179	-0.286304	0.529915
NP_610470.1	VhaAC45	vacuolar H[+] ATPase AC45 accessory subunit, isoform B [Drosophila melanogaster]	6	379	0.942	0.297153	-0.086201	0.52702
NP_611936.2	Start1	Start1, isoform A [Drosophila melanogaster]	2	583	1.508	0.298595	0.592636	0.524917
NP_524532.2	Klp98A	Kinesin-like protein at 98A, isoform A [Drosophila melanogaster]	2	1265	1.676	0.299116	0.745022	0.524161
NP_727931.1	Nipsnap	nipsnap, isoform A [Drosophila melanogaster]	9	273	0.596	0.299917	-0.746616	0.522998
NP_995991.1	CG12006	uncharacterized protein Dmel_CG12006, isoform B [Drosophila melanogaster]	1	531	1.422	0.300707	0.507921	0.521856
NP_573062.1	MagR	magnetic receptor, isoform A [Drosophila melanogaster]	5	130	1.872	0.302331	0.90458	0.519517
NP_611335.1	rswl	roswell [Drosophila melanogaster]	8	446	0.761	0.303087	-0.394032	0.518432
NP_724614.1	Prosalpha1	proteasome alpha1 subunit, isoform A [Drosophila melanogaster]	12	244	1.264	0.303509	0.337996	0.517828
NP_524823.1	spin	spinster, isoform D [Drosophila melanogaster]	1	630	1.501	0.305977	0.585924	0.514311
NP_724022.2	CG13284	uncharacterized protein Dmel_CG13284, isoform B [Drosophila melanogaster]	9	339	0.543	0.306509	-0.880976	0.513557
NP_726394.1	Phm	Peptidylglycine-alpha-hydroxylating monooxygenase, isoform B [Drosophila melanogaster]	6	365	1.301	0.308555	0.379621	0.510668
NP_648895.1	TyrRS	Tyrosyl-tRNA synthetase [Drosophila melanogaster]	27	525	1.143	0.308743	0.192825	0.510403
NP_996319.1	svr	silver, isoform G [Drosophila melanogaster]	3	1439	1.245	0.308864	0.316146	0.510233
NP_729388.1	GstO2	glutathione S transferase O2, isoform A [Drosophila melanogaster]	1	251	0.598	0.30903	-0.741783	0.509999
NP_001287568.1	tau	tau, isoform M [Drosophila melanogaster]	2	367	1.868	0.309214	0.901494	0.509742
NP_648408.1	CG11811	uncharacterized protein Dmel_CG11811 [Drosophila melanogaster]	16	233	0.849	0.309952	-0.236164	0.508706
NP_569849.1	CG13365	uncharacterized protein Dmel_CG13365 [Drosophila melanogaster]	3	114	1.286	0.309966	0.362891	0.508686
NP_723470.1	Mtpalpha	mitochondrial trifunctional protein alpha subunit, isoform B [Drosophila melanogaster]	60	744	0.771	0.311081	-0.375197	0.507127
NP_524079.1	Pdi	protein disulfide isomerase, isoform A [Drosophila melanogaster]	54	496	0.521	0.313901	-0.940645	0.503208
NP_524711.1	Hmgs	HMG coenzyme A synthase, isoform A [Drosophila melanogaster]	5	465	1.494	0.314557	0.57918	0.502301
NP_650964.1	CG3301	CG3301, isoform A [Drosophila melanogaster]	2	250	1.141	0.315112	0.190299	0.501536
NP_723338.1	Bsg	basigin, isoform A [Drosophila melanogaster]	2	265	1.275	0.315627	0.350497	0.500826
NP_524355.2	mRpS10	mitochondrial ribosomal protein S10, isoform B [Drosophila melanogaster]	5	173	0.698	0.3174	-0.518701	0.498393
NP_996395.1	alpha-Man-Ia	alpha-Mannosidase class I a, isoform H [Drosophila melanogaster]	1	667	1.609	0.317508	0.686164	0.498245
NP_001245762.1	Cdc42	Cdc42, isoform C [Drosophila melanogaster]	10	191	1.298	0.318033	0.37629	0.497528
NP_996339.2	CG2658	CG2658, isoform C [Drosophila melanogaster]	45	819	1.344	0.318441	0.426533	0.496971
NP_524942.1	l(3)87Df	lethal (3) 87Df [Drosophila melanogaster]	3	110	1.625	0.320543	0.70044	0.494113
NP_651195.1	RpS19b	ribosomal protein S19b, isoform B [Drosophila melanogaster]	4	155	0.517	0.322789	-0.951764	0.491082
NP_001260303.1	RpS2	ribosomal protein S2, isoform B [Drosophila melanogaster]	16	267	1.408	0.32296	0.493647	0.490852
NP_477368.1	Trn	transportin, isoform A [Drosophila melanogaster]	4	893	1.778	0.323035	0.830255	0.49075
NP_001260190.1	ninaC	neither inactivation nor afterpotential C, isoform D [Drosophila melanogaster]	1	1135	1.568	0.323825	0.648926	0.48969
NP_524519.1	His2Av	histone H2A variant, isoform A [Drosophila melanogaster]	8	141	0.482	0.32441	-1.05289	0.488906
NP_608991.2	CG9150	CG9150 [Drosophila melanogaster]	2	251	0.671	0.32511	-0.575615	0.487969
NP_650565.2	CG10340	uncharacterized protein Dmel_CG10340 [Drosophila melanogaster]	11	278	0.725	0.325659	-0.463947	0.487237
NP_647756.1	CPT2	carnitine palmitoyltransferase 2 [Drosophila melanogaster]	36	667	0.629	0.325717	-0.668868	0.487159
NP_001163275.2	Pde8	phosphodiesterase 8, isoform O [Drosophila melanogaster]	2	1050	1.96	0.326913	0.970854	0.485568
NP_611234.1	CG6484	CG6484 [Drosophila melanogaster]	5	465	0.574	0.326982	-0.800877	0.485476
NP_732662.2	CASK	CASK, isoform G [Drosophila melanogaster]	1	609	1.455	0.327827	0.541019	0.484355
NP_724916.1	JhI-1	juvenile hormone-inducible protein 1 [Drosophila melanogaster]	6	766	1.358	0.328802	0.441483	0.483066
NP_477081.1	Idgf6	imaginal disc growth factor 6, isoform A [Drosophila melanogaster]	25	452	1.902	0.329064	0.927517	0.48272
NP_608573.1	l(2)10685	lethal (2) 10685 [Drosophila melanogaster]	6	503	0.703	0.330093	-0.508403	0.481364
NP_524714.1	hoip	hoi-polloi, isoform A [Drosophila melanogaster]	3	127	0.636	0.330684	-0.652901	0.480587
NP_476759.1	Egfr	epidermal growth factor receptor, isoform B [Drosophila melanogaster]	6	1426	1.339	0.330709	0.421156	0.480553
NP_001247362.1	RpS8	ribosomal protein S8, isoform E [Drosophila melanogaster]	15	208	1.47	0.33111	0.555816	0.480027
NP_001260072.1	vkg	viking, isoform C [Drosophila melanogaster]	23	1940	1.597	0.331439	0.675364	0.479596
NP_608746.1	CG17221	uncharacterized protein Dmel_CG17221, isoform A [Drosophila melanogaster]	3	413	0.706	0.332699	-0.50226	0.477949
NP_610813.3	CG8768	CG8768 [Drosophila melanogaster]	12	302	0.662	0.33557	-0.595097	0.474216
NP_610504.4	CG1827	CG1827 [Drosophila melanogaster]	4	393	2.066	0.336696	1.04684	0.472762
NP_001285697.1	Coprox	coproporphyrinogen oxidase, isoform B [Drosophila melanogaster]	12	390	0.738	0.33753	-0.438307	0.471688
NP_731927.1	His4r	histone H4 replacement, isoform A [Drosophila melanogaster]	10	103	0.199	0.338405	-2.32916	0.470564
NP_001259822.1	RpLP1	ribosomal protein LP1, isoform B [Drosophila melanogaster]	6	112	0.582	0.341879	-0.780909	0.466128
NP_572181.4	l(1)G0334	lethal (1) G0334, isoform A [Drosophila melanogaster]	22	399	0.617	0.342634	-0.696658	0.46517
NP_648304.1	CG4461	CG4461 [Drosophila melanogaster]	4	200	1.287	0.344246	0.364012	0.463131
NP_611087.1	CysRS	Cysteinyl-tRNA synthetase [Drosophila melanogaster]	12	741	1.521	0.345524	0.60502	0.461522
NP_524361.4	Tm2	tropomyosin 2, isoform A [Drosophila melanogaster]	3	284	1.344	0.345644	0.426533	0.461371
NP_611840.1	CG5569	CG5569 [Drosophila melanogaster]	7	196	0.544	0.346238	-0.878321	0.460625
NP_649472.1	CG9804	CG9804, isoform A [Drosophila melanogaster]	2	234	1.534	0.346916	0.617298	0.459776
NP_648272.1	pix	pixie, isoform A [Drosophila melanogaster]	10	611	1.385	0.347627	0.469886	0.458887
NP_536784.1	clt	cricklet [Drosophila melanogaster]	9	562	0.777	0.347634	-0.364013	0.458877
NP_725374.1	SelD	Selenide,water dikinase, isoform A [Drosophila melanogaster]	8	398	1.297	0.347647	0.375178	0.458862
NP_523684.2	Galphao	G protein alpha o subunit, isoform A [Drosophila melanogaster]	15	354	1.528	0.348788	0.611645	0.457439
NP_732364.1	CG31229	uncharacterized protein Dmel_CG31229 [Drosophila melanogaster]	2	195	0.787	0.349111	-0.345564	0.457036
NP_727992.1	RpS19a	ribosomal protein S19a, isoform B [Drosophila melanogaster]	17	156	1.349	0.349442	0.43189	0.456625
NP_524370.2	blp	black pearl, isoform A [Drosophila melanogaster]	18	141	0.622	0.350018	-0.685014	0.45591
NP_611352.1	Eip55E	Eip55E, isoform A [Drosophila melanogaster]	10	393	1.295	0.350383	0.372952	0.455457
NP_477266.1	Vha44	vacuolar H[+] ATPase 44kD subunit, isoform A [Drosophila melanogaster]	40	388	0.831	0.36052	-0.26708	0.443071
NP_569844.2	CG3156	CG3156 [Drosophila melanogaster]	7	692	0.592	0.360523	-0.756331	0.443067
NP_477392.1	scf	supercoiling factor, isoform A [Drosophila melanogaster]	18	329	2.102	0.362276	1.07176	0.44096
NP_001137933.1	CG7394	CG7394, isoform B [Drosophila melanogaster]	5	128	0.707	0.36373	-0.500218	0.439221
NP_001247129.1	msps	mini spindles, isoform D [Drosophila melanogaster]	24	2082	1.324	0.364264	0.404903	0.438584
NP_610664.1	CG13220	uncharacterized protein Dmel_CG13220, isoform A [Drosophila melanogaster]	6	153	0.435	0.366927	-1.20091	0.435421
NP_649913.1	CG9399	CG9399, isoform A [Drosophila melanogaster]	6	154	0.701	0.367606	-0.512514	0.434617
NP_732610.1	Rab1	Rab1 [Drosophila melanogaster]	14	205	0.828	0.368231	-0.272297	0.433879
NP_647716.1	CG8993	CG8993 [Drosophila melanogaster]	4	142	0.592	0.370692	-0.756331	0.430986
NP_611947.2	Adck	aarF domain containing kinase, isoform A [Drosophila melanogaster]	6	518	1.641	0.372251	0.714575	0.429164
NP_608888.2	Gmd	GDP-mannose 4,6-dehydratase [Drosophila melanogaster]	4	395	1.204	0.372684	0.267835	0.428659
NP_610093.1	CG9248	CG9248, isoform B [Drosophila melanogaster]	11	494	1.396	0.373185	0.481299	0.428075
NP_610234.3	CG3420	CG3420, isoform A [Drosophila melanogaster]	5	136	0.627	0.375102	-0.673463	0.42585
NP_995900.1	par-1	par-1, isoform A [Drosophila melanogaster]	3	938	1.717	0.375425	0.77989	0.425477
NP_608375.1	CG9577	CG9577 [Drosophila melanogaster]	10	312	0.603	0.376983	-0.72977	0.423678
NP_609845.1	CG5131	CG5131 [Drosophila melanogaster]	16	283	0.675	0.379086	-0.567041	0.421262
NP_511106.1	Gip	GIP-like [Drosophila melanogaster]	8	264	0.677	0.37952	-0.562772	0.420765
NP_572663.1	CG1582	CG1582, isoform A [Drosophila melanogaster]	3	1288	1.393	0.379943	0.478195	0.420281
NP_649674.1	CG1315	CG1315, isoform A [Drosophila melanogaster]	2	419	0.551	0.382582	-0.859876	0.417276
NP_001246627.1	CG42540	uncharacterized protein Dmel_CG42540, isoform G [Drosophila melanogaster]	1	517	1.701	0.383283	0.766383	0.416481
NP_524421.1	RpS20	ribosomal protein S20 [Drosophila melanogaster]	8	120	1.285	0.383318	0.361768	0.416441
NP_608924.1	CG12512	uncharacterized protein Dmel_CG12512 [Drosophila melanogaster]	17	593	1.347	0.383928	0.42975	0.415751
NP_001138000.1	CG33170	uncharacterized protein Dmel_CG33170, isoform B [Drosophila melanogaster]	5	71	0.673	0.384411	-0.571322	0.415204
NP_649677.1	Ccp84Ag	Ccp84Ag [Drosophila melanogaster]	7	191	0.73	0.385111	-0.454032	0.414414
NP_610228.1	CG3270	CG3270 [Drosophila melanogaster]	7	440	0.734	0.389517	-0.446148	0.409473
NP_477150.1	dare	defective in the avoidance of repellents [Drosophila melanogaster]	5	466	0.728	0.390635	-0.45799	0.408229
NP_001163065.1	l(2)01289	lethal (2) 01289, isoform F [Drosophila melanogaster]	16	1786	1.488	0.391434	0.573375	0.407341
NP_477439.2	Trap1	Trap1, isoform A [Drosophila melanogaster]	32	691	0.755	0.394533	-0.405451	0.403916
NP_572320.2	Marf	mitochondrial assembly regulatory factor, isoform D [Drosophila melanogaster]	25	814	1.188	0.396566	0.248535	0.401685
NP_001260668.1	l(2)k14505	lethal (2) k14505, isoform B [Drosophila melanogaster]	5	279	0.613	0.396882	-0.706041	0.401339
NP_651600.1	mfrn	mitoferrin [Drosophila melanogaster]	12	379	1.134	0.398711	0.181421	0.399341
NP_728982.1	PMP34	peroxisomal membrane protein 34, isoform A [Drosophila melanogaster]	5	314	0.411	0.39877	-1.28279	0.399278
NP_611413.2	CG11961	uncharacterized protein Dmel_CG11961, isoform B [Drosophila melanogaster]	2	867	2.268	0.401183	1.18142	0.396658
NP_649302.1	CG7632	CG7632, isoform A [Drosophila melanogaster]	7	330	1.317	0.402017	0.397255	0.395756
NP_523889.1	mRpL23	mitochondrial ribosomal protein L23, isoform A [Drosophila melanogaster]	4	150	0.31	0.403631	-1.68966	0.394016
NP_649169.3	Tom20	translocase of outer membrane 20, isoform A [Drosophila melanogaster]	7	171	0.831	0.404143	-0.26708	0.393464
NP_649052.1	Cyp12c1	Cyp12c1, isoform A [Drosophila melanogaster]	11	524	0.684	0.404438	-0.547932	0.393148
NP_001259313.1	Tom40	translocase of outer membrane 40, isoform C [Drosophila melanogaster]	14	344	0.695	0.40777	-0.524915	0.389585
NP_650190.1	CG5167	CG5167 [Drosophila melanogaster]	30	431	1.192	0.40789	0.253384	0.389457
NP_536796.2	Rok	Rho kinase, isoform A [Drosophila melanogaster]	8	1390	1.403	0.408138	0.488515	0.389193
NP_001259082.1	CaMKII	Calcium/calmodulin-dependent protein kinase II, isoform K [Drosophila melanogaster]	1	482	2.797	0.410853	1.48388	0.386313
NP_523990.1	Dhpr	dihydropteridine reductase, isoform A [Drosophila melanogaster]	5	235	1.247	0.410957	0.318461	0.386203
NP_722836.1	CG2862	CG2862, isoform B [Drosophila melanogaster]	5	126	0.717	0.411686	-0.479955	0.385434
NP_610453.1	Pmm45A	phosphomannomutase 45A [Drosophila melanogaster]	2	623	1.536	0.414384	0.619178	0.382597
NP_729448.1	Argk	arginine kinase, isoform C [Drosophila melanogaster]	5	396	1.836	0.414421	0.876566	0.382558
NP_651875.1	CG1774	CG1774, isoform A [Drosophila melanogaster]	2	472	2.292	0.414987	1.19661	0.381966
NP_611006.1	ADPS	alkyldihydroxyacetonephosphate synthase, isoform A [Drosophila melanogaster]	16	631	1.177	0.415691	0.235114	0.381229
NP_727896.1	CG8974	CG8974, isoform A [Drosophila melanogaster]	5	277	1.567	0.421481	0.648005	0.375222
NP_611537.2	RIC-3	RIC3 acetylcholine receptor chaperone, isoform C [Drosophila melanogaster]	1	505	1.982	0.421834	0.986957	0.374858
NP_648589.1	Pmm2	phosphomannomutase type 2 [Drosophila melanogaster]	3	254	0.452	0.422586	-1.14561	0.374084
NP_651038.3	CG13850	uncharacterized protein Dmel_CG13850, isoform A [Drosophila melanogaster]	17	564	0.713	0.424532	-0.488026	0.372089
NP_649015.2	CG5567	CG5567 [Drosophila melanogaster]	3	330	1.24	0.426003	0.31034	0.370588
NP_001260350.1	LManI	lysosomal alpha-mannosidase I, isoform B [Drosophila melanogaster]	18	950	0.765	0.428008	-0.386468	0.368548
NP_651711.1	Obp99c	Odorant-binding protein 99c, isoform A [Drosophila melanogaster]	7	151	1.684	0.43177	0.751892	0.364747
NP_524683.2	Shc	SHC-adaptor protein [Drosophila melanogaster]	3	409	1.367	0.434341	0.451013	0.362169
NP_724654.1	CG30373	uncharacterized protein Dmel_CG30373, isoform A [Drosophila melanogaster]	5	158	0.623	0.436583	-0.682696	0.359933
NP_728885.1	CG32267	uncharacterized protein Dmel_CG32267 [Drosophila melanogaster]	3	49	0.805	0.439463	-0.312939	0.357078
NP_609361.1	eEF1delta	eEF1delta, isoform B [Drosophila melanogaster]	2	256	0.49	0.439724	-1.02915	0.35682
NP_523856.2	key	kenny, isoform A [Drosophila melanogaster]	1	387	1.372	0.440178	0.45628	0.356372
NP_610635.4	Cyp12d1-p	Cyp12d1-p, isoform A [Drosophila melanogaster]	15	521	0.709	0.442021	-0.496142	0.354558
NP_648894.2	GluRS-m	Glutamyl-tRNA synthetase, mitochondrial [Drosophila melanogaster]	4	511	0.539	0.44727	-0.891643	0.34943
NP_612043.1	Reg-2	rhythmically expressed gene 2 [Drosophila melanogaster]	10	260	1.249	0.447992	0.320773	0.34873
NP_647737.1	ProRS-m	Prolyl-tRNA synthetase, mitochondrial, isoform A [Drosophila melanogaster]	3	458	0.833	0.449865	-0.263612	0.346917
NP_725068.1	Tret1-1	trehalose transporter 1-1, isoform B [Drosophila melanogaster]	1	489	0.798	0.450388	-0.325539	0.346414
NP_722724.1	Eno	enolase, isoform E [Drosophila melanogaster]	35	500	0.861	0.452889	-0.215915	0.344009
NP_724880.1	CG2269	CG2269, isoform B [Drosophila melanogaster]	7	783	1.622	0.455955	0.697774	0.341078
NP_524996.1	bor	belphegor, isoform A [Drosophila melanogaster]	62	604	1.368	0.45926	0.452068	0.337942
NP_524002.1	RpS17	ribosomal protein S17 [Drosophila melanogaster]	7	131	1.441	0.460518	0.52707	0.336753
NP_609980.1	CG10166	uncharacterized protein Dmel_CG10166 [Drosophila melanogaster]	4	241	0.551	0.461991	-0.859876	0.335366
NP_001284987.1	CG10932	uncharacterized protein Dmel_CG10932, isoform B [Drosophila melanogaster]	19	410	0.79	0.462416	-0.340075	0.334967
NP_648268.1	ValRS-m	Valyl-tRNA synthetase, mitochondrial, isoform A [Drosophila melanogaster]	13	994	1.204	0.466625	0.267835	0.331032
NP_001188689.2	RpL27A	ribosomal protein L27A, isoform C [Drosophila melanogaster]	9	149	1.234	0.469695	0.303342	0.328184
NP_572967.2	CG5321	CG5321, isoform B [Drosophila melanogaster]	6	413	0.868	0.470585	-0.204233	0.327362
NP_001245892.1	Lam	lamin, isoform B [Drosophila melanogaster]	55	622	1.768	0.470841	0.822118	0.327126
NP_649749.2	CG2846	CG2846, isoform A [Drosophila melanogaster]	6	153	0.797	0.472353	-0.327348	0.325733
NP_650523.1	CG5903	CG5903, isoform A [Drosophila melanogaster]	15	226	0.753	0.472904	-0.409278	0.325227
NP_610217.1	Fmo-2	Flavin-containing monooxygenase 2 [Drosophila melanogaster]	3	429	1.599	0.473404	0.67717	0.324768
NP_610309.1	CG2065	CG2065, isoform A [Drosophila melanogaster]	2	300	0.58	0.474055	-0.785875	0.324172
NP_523946.1	sfl	sulfateless, isoform A [Drosophila melanogaster]	2	1048	1.66	0.474958	0.731183	0.323345
NP_725196.1	Galphaq	G protein alpha q subunit, isoform D [Drosophila melanogaster]	2	353	1.743	0.476105	0.801573	0.322297
NP_608676.2	CG15390	uncharacterized protein Dmel_CG15390 [Drosophila melanogaster]	2	275	0.655	0.476741	-0.610433	0.321718
NP_524715.2	ScpX	sterol carrier protein X-related thiolase [Drosophila melanogaster]	11	544	1.606	0.478458	0.683472	0.320156
NP_001262819.1	Mitofilin	mitofilin, isoform E [Drosophila melanogaster]	2	746	1.39	0.478915	0.475085	0.319741
NP_609665.2	ics	icarus, isoform A [Drosophila melanogaster]	5	283	1.661	0.479108	0.732052	0.319567
NP_611409.2	CG7461	CG7461, isoform B [Drosophila melanogaster]	40	627	0.637	0.479648	-0.650635	0.319077
NP_001027089.1	waw	waclaw [Drosophila melanogaster]	7	696	0.846	0.480598	-0.24127	0.318218
NP_995670.2	Apoltp	apolipoprotein lipid transfer particle [Drosophila melanogaster]	60	4333	1.129	0.481571	0.175045	0.317339
NP_001262890.1	CG13601	uncharacterized protein Dmel_CG13601, isoform B [Drosophila melanogaster]	10	277	0.592	0.484443	-0.756331	0.314757
NP_650120.1	glo	glorund, isoform A [Drosophila melanogaster]	5	586	1.248	0.485025	0.319618	0.314235
NP_572178.1	Torsin	torsin, isoform A [Drosophila melanogaster]	9	340	0.89	0.489664	-0.168123	0.310102
NP_650054.2	CG17726	uncharacterized protein Dmel_CG17726 [Drosophila melanogaster]	7	437	0.698	0.493461	-0.518701	0.306747
NP_724718.1	Ggamma1	G protein gamma 1, isoform A [Drosophila melanogaster]	3	70	1.848	0.498884	0.885965	0.302
NP_572436.1	CG2254	CG2254 [Drosophila melanogaster]	11	320	0.915	0.501971	-0.128156	0.299321
NP_729792.1	Adk1	adenylate kinase 1, isoform B [Drosophila melanogaster]	9	229	1.164	0.502956	0.219091	0.29847
NP_727314.1	His3.3B	histone H3.3B, isoform B [Drosophila melanogaster]	2	136	0.547	0.503662	-0.870387	0.297861
NP_733230.1	CG12428	uncharacterized protein Dmel_CG12428, isoform A [Drosophila melanogaster]	25	618	1.403	0.504498	0.488515	0.297141
NP_647946.1	CG10672	uncharacterized protein Dmel_CG10672 [Drosophila melanogaster]	17	317	0.792	0.504506	-0.336428	0.297133
NP_649765.1	CG7910	CG7910, isoform A [Drosophila melanogaster]	21	530	1.342	0.504995	0.424385	0.296713
NP_511119.2	hop	hopscotch [Drosophila melanogaster]	4	1177	1.147	0.508009	0.197865	0.294129
NP_726504.2	emp	epithelial membrane protein, isoform B [Drosophila melanogaster]	16	551	1.327	0.508023	0.408168	0.294117
NP_649517.1	CG2604	CG2604, isoform A [Drosophila melanogaster]	20	430	0.866	0.508043	-0.207561	0.294099
NP_001262907.1	Orct2	organic cation transporter 2, isoform B [Drosophila melanogaster]	2	567	0.6	0.508718	-0.736966	0.293523
NP_476761.3	awd	abnormal wing discs, isoform C [Drosophila melanogaster]	7	168	0.668	0.508761	-0.58208	0.293486
NP_476908.1	Vha55	vacuolar H[+]-ATPase 55kD subunit, isoform B [Drosophila melanogaster]	39	490	0.896	0.513528	-0.158429	0.289436
NP_650248.1	CG7488	CG7488 [Drosophila melanogaster]	3	373	0.69	0.514292	-0.535332	0.28879
NP_001189056.1	Sh3beta	Sh3beta, isoform D [Drosophila melanogaster]	1	216	1.497	0.51521	0.582074	0.288016
NP_476773.1	tud	tudor, isoform A [Drosophila melanogaster]	14	2515	1.4	0.515585	0.485427	0.2877
NP_001260183.1	Ndae1	Na[+]-driven anion exchanger 1, isoform J [Drosophila melanogaster]	1	1046	1.643	0.518481	0.716332	0.285267
NP_570080.1	VhaAC39-1	vacuolar H[+] ATPase AC39 subunit 1 [Drosophila melanogaster]	8	350	0.568	0.519262	-0.816037	0.284613
NP_001260085.1	CG5828	CG5828, isoform B [Drosophila melanogaster]	5	361	1.371	0.521978	0.455229	0.282348
NP_649017.1	CG7430	CG7430, isoform A [Drosophila melanogaster]	24	504	0.847	0.522359	-0.239566	0.282031
NP_612095.3	CG2277	CG2277, isoform A [Drosophila melanogaster]	4	534	0.7	0.524355	-0.514573	0.280374
NP_724342.1	His2B:CG17949	histone H2B [Drosophila melanogaster]	11	123	0.559	0.524643	-0.83908	0.280136
NP_001246483.1	l(2)tid	lethal (2) tumorous imaginal discs, isoform D [Drosophila melanogaster]	1	514	0.618	0.52864	-0.694321	0.27684
NP_609394.1	Mdh1	malate dehydrogenase 1, isoform A [Drosophila melanogaster]	19	337	1.436	0.529052	0.522056	0.276501
NP_001260810.1	Acsl	Acyl-CoA synthetase long-chain, isoform J [Drosophila melanogaster]	47	728	0.832	0.53098	-0.265345	0.274922
NP_525120.1	Nop60B	nucleolar protein at 60B, isoform A [Drosophila melanogaster]	14	508	0.716	0.531794	-0.481969	0.274257
NP_723772.2	MRP	Multidrug-Resistance like protein 1, isoform A [Drosophila melanogaster]	51	1549	1.351	0.531827	0.434028	0.27423
NP_001261719.1	CG18815	uncharacterized protein Dmel_CG18815, isoform E [Drosophila melanogaster]	4	232	0.78	0.533628	-0.358454	0.272761
NP_650843.1	CG4538	CG4538, isoform A [Drosophila melanogaster]	20	673	1.166	0.538997	0.221568	0.268413
NP_609566.1	CG6388	CG6388 [Drosophila melanogaster]	3	578	1.357	0.539117	0.440421	0.268317
NP_523910.1	mge	maggie, isoform A [Drosophila melanogaster]	7	148	0.761	0.540285	-0.394032	0.267377
NP_001285254.1	CG9509	CG9509, isoform B [Drosophila melanogaster]	28	646	1.26	0.540603	0.333424	0.267122
NP_523735.2	Cp1	cysteine proteinase-1, isoform C [Drosophila melanogaster]	24	371	0.732	0.541334	-0.450084	0.266535
NP_001286991.1	CG13315	uncharacterized protein Dmel_CG13315, isoform B [Drosophila melanogaster]	3	69	1.206	0.541365	0.27023	0.26651
NP_729400.1	Cpr66D	cuticular protein 66D [Drosophila melanogaster]	9	270	1.508	0.543457	0.592636	0.264835
NP_724888.2	14-3-3zeta	14-3-3zeta, isoform F [Drosophila melanogaster]	2	248	1.846	0.543702	0.884403	0.264639
NP_995838.1	CG7639	CG7639 [Drosophila melanogaster]	21	443	0.808	0.545013	-0.307573	0.263593
NP_649436.2	beta-Man	beta-Mannosidase, isoform A [Drosophila melanogaster]	8	908	0.732	0.54554	-0.450084	0.263174
NP_723735.2	CG31759	uncharacterized protein Dmel_CG31759, isoform C [Drosophila melanogaster]	2	564	0.793	0.545544	-0.334607	0.26317
NP_001027270.1	Adh	alcohol dehydrogenase, isoform E [Drosophila melanogaster]	16	256	0.669	0.550037	-0.579922	0.259608
NP_001259956.1	Pgk	phosphoglycerate kinase, isoform B [Drosophila melanogaster]	23	415	0.83	0.55004	-0.268817	0.259606
NP_001246681.1	Prm	paramyosin, isoform E [Drosophila melanogaster]	1	307	1.641	0.552439	0.714575	0.257716
NP_610687.1	Egm	enigma [Drosophila melanogaster]	22	639	0.757	0.552834	-0.401635	0.257405
NP_725114.1	RpS11	ribosomal protein S11, isoform C [Drosophila melanogaster]	7	155	1.221	0.554943	0.288063	0.255752
NP_651323.3	bai	baiser [Drosophila melanogaster]	8	206	0.562	0.555699	-0.831358	0.255161
NP_609219.1	CG17294	uncharacterized protein Dmel_CG17294 [Drosophila melanogaster]	3	255	1.511	0.562837	0.595504	0.249617
NP_001285747.1	RpS13	ribosomal protein S13, isoform C [Drosophila melanogaster]	12	151	1.284	0.563777	0.360645	0.248893
NP_731972.1	Mf	myofilin, isoform C [Drosophila melanogaster]	1	168	1.378	0.568187	0.462576	0.245509
NP_477169.1	nrv2	nervana 2, isoform A [Drosophila melanogaster]	1	322	1.238	0.569132	0.308011	0.244787
NP_727109.2	CG4095	CG4095 [Drosophila melanogaster]	3	503	1.607	0.572034	0.68437	0.242578
NP_573376.2	CG8034	CG8034, isoform A [Drosophila melanogaster]	3	647	1.499	0.572762	0.584	0.242026
NP_724679.2	Mal-A6	maltase A6, isoform D [Drosophila melanogaster]	18	601	1.872	0.575989	0.90458	0.239586
NP_608954.1	CG11147	uncharacterized protein Dmel_CG11147, isoform A [Drosophila melanogaster]	9	711	0.881	0.576994	-0.182786	0.238829
NP_651120.1	CG6726	CG6726, isoform A [Drosophila melanogaster]	11	401	1.132	0.577904	0.178874	0.238144
NP_573179.1	CG4928	CG4928, isoform B [Drosophila melanogaster]	9	538	1.349	0.578094	0.43189	0.238002
NP_652013.1	cathD	cathD, isoform A [Drosophila melanogaster]	11	392	1.275	0.579578	0.350497	0.236888
NP_652068.1	CG5704	CG5704, isoform A [Drosophila melanogaster]	3	335	1.199	0.58269	0.261832	0.234562
NP_572662.1	CG1637	CG1637, isoform C [Drosophila melanogaster]	6	450	0.648	0.582878	-0.625934	0.234423
NP_612087.1	Sac1	Sac1 phosphatase, isoform A [Drosophila melanogaster]	16	592	1.323	0.585501	0.403813	0.232472
NP_524425.2	Mvl	malvolio, isoform E [Drosophila melanogaster]	2	596	1.149	0.585567	0.200379	0.232424
NP_001285193.1	CG2453	CG2453, isoform B [Drosophila melanogaster]	2	301	1.203	0.58748	0.266637	0.231007
NP_647847.1	Mul1	mitochondrial E3 ubiquitin protein ligase 1, isoform A [Drosophila melanogaster]	8	338	0.879	0.591375	-0.186065	0.228137
NP_651896.1	CG2118	CG2118, isoform A [Drosophila melanogaster]	26	698	0.843	0.591459	-0.246395	0.228076
NP_573114.2	CG9914	CG9914, isoform A [Drosophila melanogaster]	16	315	1.112	0.592791	0.153157	0.227098
NP_648062.2	CG10077	uncharacterized protein Dmel_CG10077, isoform A [Drosophila melanogaster]	14	818	1.198	0.593634	0.260628	0.226481
NP_650327.1	Cyp6d5	Cyp6d5 [Drosophila melanogaster]	33	508	0.729	0.596017	-0.456009	0.224741
NP_648284.1	CG5144	CG5144 [Drosophila melanogaster]	4	388	1.533	0.596238	0.616358	0.22458
NP_001014687.3	PMCA	plasma membrane calcium ATPase, isoform N [Drosophila melanogaster]	1	1120	1.75	0.5963	0.807355	0.224535
NP_525031.1	Cyp4g1	cytochrome P450-4g1 [Drosophila melanogaster]	33	556	1.226	0.597192	0.293959	0.223886
NP_788520.2	Nc73EF	neural conserved at 73EF, isoform H [Drosophila melanogaster]	4	1017	1.208	0.598	0.27262	0.223299
NP_524293.2	Calr	calreticulin, isoform A [Drosophila melanogaster]	38	406	1.707	0.604882	0.771463	0.218329
NP_610930.1	CysRS-m	Cysteinyl-tRNA synthetase, mitochondrial, isoform A [Drosophila melanogaster]	7	558	0.823	0.605137	-0.281036	0.218146
NP_608934.1	CG7277	CG7277 [Drosophila melanogaster]	9	477	0.873	0.606435	-0.195946	0.217216
NP_572332.1	CG3226	CG3226 [Drosophila melanogaster]	12	230	1.182	0.606668	0.24123	0.217049
NP_001303378.1	CG7970	CG7970, isoform C [Drosophila melanogaster]	3	255	1.523	0.606843	0.606916	0.216923
NP_610143.3	CG3262	CG3262, isoform D [Drosophila melanogaster]	5	293	1.232	0.614305	0.301002	0.211616
NP_611952.1	CG3663	CG3663 [Drosophila melanogaster]	12	208	0.567	0.617754	-0.818579	0.209185
NP_647860.1	Chd64	Chd64, isoform B [Drosophila melanogaster]	12	188	1.397	0.617981	0.482332	0.209025
NP_572742.1	prtp	pretaporter, isoform A [Drosophila melanogaster]	35	416	1.56	0.620013	0.641546	0.207599
NP_001262379.1	bel	belle, isoform B [Drosophila melanogaster]	27	801	1.352	0.635094	0.435095	0.197162
NP_649814.1	CG8043	CG8043 [Drosophila melanogaster]	6	348	1.365	0.636318	0.448901	0.196326
NP_001285095.1	CG1637	CG1637, isoform D [Drosophila melanogaster]	5	459	0.708	0.637598	-0.498179	0.195453
NP_001285801.1	nmd	no mitochondrial derivative, isoform C [Drosophila melanogaster]	18	369	1.116	0.638339	0.158337	0.194949
NP_611022.2	mRpL41	mitochondrial ribosomal protein L41 [Drosophila melanogaster]	6	166	0.688	0.64004	-0.53952	0.193793
NP_001286133.1	RpL21	ribosomal protein L21, isoform C [Drosophila melanogaster]	12	159	0.852	0.640858	-0.231075	0.193238
NP_647889.2	Fdx2	ferredoxin 2 [Drosophila melanogaster]	2	152	0.701	0.641852	-0.512514	0.192565
NP_001097742.1	CG6567	CG6567 [Drosophila melanogaster]	13	235	0.77	0.642945	-0.37707	0.191826
NP_650580.1	CG3678	CG3678, isoform A [Drosophila melanogaster]	8	282	0.533	0.645687	-0.907793	0.189978
NP_650503.1	Hmt-1	heavy metal tolerance factor 1 [Drosophila melanogaster]	18	866	1.109	0.647097	0.149259	0.18903
NP_651278.2	Ppox	protoporphyrinogen oxidase [Drosophila melanogaster]	13	475	0.83	0.647263	-0.268817	0.188919
NP_610588.2	Cyp49a1	Cyp49a1, isoform A [Drosophila melanogaster]	2	589	1.266	0.648337	0.340277	0.188199
NP_724569.1	didum	dilute class unconventional myosin, isoform C [Drosophila melanogaster]	23	1800	1.182	0.649511	0.24123	0.187414
NP_001137776.1	Rrp1	recombination repair protein 1, isoform B [Drosophila melanogaster]	27	706	0.721	0.65524	-0.471929	0.183599
NP_649745.3	ArgRS-m	Arginyl-tRNA synthetase, mitochondrial, isoform A [Drosophila melanogaster]	7	594	0.803	0.664916	-0.316528	0.177233
NP_650717.1	CG7675	CG7675, isoform B [Drosophila melanogaster]	15	336	1.245	0.66658	0.316146	0.176148
NP_995932.1	l(2)tid	lethal (2) tumorous imaginal discs, isoform B [Drosophila melanogaster]	1	520	0.712	0.667312	-0.490051	0.175671
NP_650138.1	CG18547	uncharacterized protein Dmel_CG18547 [Drosophila melanogaster]	3	345	1.203	0.667703	0.266637	0.175417
NP_001246856.1	CG10565	uncharacterized protein Dmel_CG10565, isoform B [Drosophila melanogaster]	10	646	1.263	0.66865	0.336855	0.174801
NP_651180.3	PTPMT1	protein tyrosine phosphatase, mitochondrial 1, isoform B [Drosophila melanogaster]	5	200	0.679	0.668754	-0.558517	0.174734
NP_651221.1	CG6178	CG6178 [Drosophila melanogaster]	27	544	1.263	0.669045	0.336855	0.174544
NP_650680.1	CG7215	CG7215, isoform A [Drosophila melanogaster]	3	130	1.254	0.675167	0.326537	0.170589
NP_727696.2	CG1640	CG1640, isoform B [Drosophila melanogaster]	33	575	0.847	0.676157	-0.239566	0.169953
NP_609218.1	CG13390	uncharacterized protein Dmel_CG13390 [Drosophila melanogaster]	6	381	0.844	0.677199	-0.244685	0.169284
NP_647949.1	CG4611	CG4611 [Drosophila melanogaster]	9	703	1.191	0.677991	0.252173	0.168776
NP_001138112.1	CG42235	uncharacterized protein Dmel_CG42235, isoform A [Drosophila melanogaster]	2	695	1.678	0.678742	0.746743	0.168296
NP_728435.1	GCS2alpha	glucosidase 2 alpha subunit, isoform C [Drosophila melanogaster]	40	924	1.248	0.681249	0.319618	0.166694
NP_731186.2	sgll	sugarlethal, isoform A [Drosophila melanogaster]	3	246	1.338	0.681334	0.420078	0.16664
NP_651849.1	CG1544	CG1544 [Drosophila melanogaster]	15	919	0.864	0.685696	-0.210897	0.163868
NP_609970.4	CG10195	uncharacterized protein Dmel_CG10195, isoform B [Drosophila melanogaster]	2	361	1.48	0.68623	0.565597	0.16353
NP_001260550.2	RpL30	ribosomal protein L30, isoform E [Drosophila melanogaster]	6	111	0.82	0.690208	-0.286304	0.16102
NP_648155.1	CG7409	CG7409 [Drosophila melanogaster]	6	154	1.487	0.695467	0.572405	0.157723
NP_650475.1	AOX1	aldehyde oxidase 1 [Drosophila melanogaster]	27	1273	0.841	0.697826	-0.249822	0.156253
NP_524211.1	RpLP0	ribosomal protein LP0, isoform A [Drosophila melanogaster]	21	317	0.851	0.704753	-0.232769	0.151963
NP_651274.1	atl	atlastin, isoform A [Drosophila melanogaster]	18	541	1.201	0.706278	0.264236	0.151024
NP_524261.1	alpha-Est7	alpha-Esterase-7 [Drosophila melanogaster]	27	572	1.361	0.707153	0.444667	0.150487
NP_611460.1	CG11208	uncharacterized protein Dmel_CG11208 [Drosophila melanogaster]	21	568	0.815	0.710436	-0.295128	0.148475
NP_612094.2	CG9149	CG9149 [Drosophila melanogaster]	10	392	1.338	0.710561	0.420078	0.148399
NP_610886.2	Roe1	Roe1 [Drosophila melanogaster]	16	213	0.828	0.711478	-0.272297	0.147839
NP_648512.2	CG5946	CG5946, isoform B [Drosophila melanogaster]	15	316	1.238	0.711638	0.308011	0.147741
NP_001261143.1	asrij	asrij, isoform B [Drosophila melanogaster]	10	258	1.297	0.715913	0.375178	0.14514
NP_610724.1	CG8888	CG8888 [Drosophila melanogaster]	11	388	1.368	0.717311	0.452068	0.144293
NP_001033939.2	Sod3	superoxide dismutase 3, isoform E [Drosophila melanogaster]	7	243	0.773	0.717598	-0.37146	0.144119
NP_570046.1	CG3603	CG3603, isoform A [Drosophila melanogaster]	6	249	1.136	0.720703	0.183963	0.142244
NP_001163499.1	cpx	complexin, isoform S [Drosophila melanogaster]	5	146	0.736	0.721502	-0.442222	0.141763
NP_001246500.1	GstE12	glutathione S transferase E12, isoform B [Drosophila melanogaster]	6	223	1.461	0.725758	0.546956	0.139208
NP_573054.2	CG9240	CG9240, isoform A [Drosophila melanogaster]	2	166	1.313	0.726037	0.392867	0.139041
NP_650679.3	Prx5	peroxiredoxin 5, isoform A [Drosophila melanogaster]	14	190	0.882	0.726877	-0.181149	0.138539
NP_001303387.1	Nplp2	Neuropeptide-like precursor 2, isoform C [Drosophila melanogaster]	9	119	0.73	0.728757	-0.454032	0.137417
NP_001036690.1	CG34117	uncharacterized protein Dmel_CG34117 [Drosophila melanogaster]	2	101	0.668	0.729123	-0.58208	0.137199
NP_001138137.1	CG42376	uncharacterized protein Dmel_CG42376, isoform B [Drosophila melanogaster]	4	92	0.689	0.729681	-0.537424	0.136867
NP_648837.2	IleRS-m	Isoleucyl-tRNA synthetase, mitochondrial [Drosophila melanogaster]	12	941	0.842	0.730645	-0.248108	0.136294
NP_725369.1	Opa1	optic atrophy 1, isoform A [Drosophila melanogaster]	79	972	0.853	0.732516	-0.229382	0.135183
NP_610818.1	mRpL18	mitochondrial ribosomal protein L18 [Drosophila melanogaster]	8	186	0.704	0.735393	-0.506353	0.13348
NP_648242.1	CG5989	CG5989, isoform A [Drosophila melanogaster]	13	436	0.897	0.738157	-0.15682	0.131851
NP_001259608.1	CG9921	CG9921, isoform B [Drosophila melanogaster]	3	102	0.775	0.740384	-0.367732	0.130543
NP_733366.2	aralar1	aralar1, isoform B [Drosophila melanogaster]	1	679	1.227	0.740851	0.295135	0.130269
NP_996462.1	Gbeta13F	G protein beta-subunit 13F, isoform C [Drosophila melanogaster]	9	340	1.366	0.7456	0.449957	0.127494
NP_524848.1	Hex-A	hexokinase A, isoform A [Drosophila melanogaster]	6	541	0.836	0.745636	-0.258425	0.127473
NP_001097692.1	CG1208	CG1208, isoform C [Drosophila melanogaster]	1	502	1.401	0.746356	0.486457	0.127054
NP_724013.1	Ugt36Bc	Ugt36Bc, isoform B [Drosophila melanogaster]	13	543	1.09	0.74637	0.124328	0.127046
NP_650279.1	Dic1	dicarboxylate carrier 1, isoform A [Drosophila melanogaster]	9	280	0.892	0.746509	-0.164884	0.126965
NP_650192.1	Dip-C	dipeptidase C, isoform A [Drosophila melanogaster]	4	491	0.853	0.75294	-0.229382	0.123239
NP_001027175.1	sea	scheggia, isoform E [Drosophila melanogaster]	24	317	0.759	0.754277	-0.397828	0.122469
NP_610509.2	GstT1	glutathione S transferase T1 [Drosophila melanogaster]	12	228	0.701	0.760974	-0.512514	0.11863
NP_649908.1	CG9393	CG9393, isoform A [Drosophila melanogaster]	9	327	1.217	0.761076	0.283329	0.118572
NP_651284.1	CG5805	CG5805, isoform A [Drosophila melanogaster]	2	339	1.238	0.761538	0.308011	0.118308
NP_001015405.3	FASN3	fatty acid synthase 3 [Drosophila melanogaster]	26	2394	0.884	0.763232	-0.177882	0.117344
NP_001286821.1	Mlp60A	muscle LIM protein at 60A, isoform C [Drosophila melanogaster]	3	486	1.247	0.765427	0.318461	0.116096
NP_730774.1	CkIIalpha	casein kinase IIalpha, isoform A [Drosophila melanogaster]	3	336	0.803	0.767558	-0.316528	0.114889
NP_611563.1	CG4302	CG4302 [Drosophila melanogaster]	20	532	0.817	0.770766	-0.291592	0.113078
NP_610823.1	CG3790	CG3790 [Drosophila melanogaster]	3	604	1.146	0.771855	0.196607	0.112464
NP_650645.1	alt	aluminum tubes, isoform G [Drosophila melanogaster]	2	874	1.393	0.7733	0.478195	0.111652
NP_723365.1	Pvr	PDGF- and VEGF-receptor related, isoform B [Drosophila melanogaster]	1	1509	1.35	0.775122	0.432959	0.11063
NP_650064.1	CG5214	CG5214 [Drosophila melanogaster]	16	468	0.821	0.775369	-0.284546	0.110491
NP_477054.1	RpL11	ribosomal protein L11, isoform A [Drosophila melanogaster]	8	184	1.085	0.776282	0.117695	0.10998
NP_727150.1	Inx2	innexin 2, isoform B [Drosophila melanogaster]	10	367	0.644	0.776331	-0.634867	0.109953
NP_608354.1	Pmp70	peroxisomal membrane protein 70 kDa, isoform A [Drosophila melanogaster]	21	665	0.76	0.779889	-0.395929	0.107967
NP_726217.2	CG2852	CG2852, isoform D [Drosophila melanogaster]	22	205	1.329	0.780502	0.410341	0.107626
NP_728963.1	CG14997	uncharacterized protein Dmel_CG14997, isoform B [Drosophila melanogaster]	16	457	0.941	0.782064	-0.0877334	0.106758
NP_723532.1	CG4908	CG4908, isoform B [Drosophila melanogaster]	9	431	0.906	0.783413	-0.142417	0.106009
NP_732717.1	Sar1	Secretion-associated Ras-related 1, isoform A [Drosophila melanogaster]	9	193	0.572	0.783507	-0.805913	0.105957
NP_649644.1	CG17919	uncharacterized protein Dmel_CG17919 [Drosophila melanogaster]	7	202	1.287	0.78553	0.364012	0.104837
NP_651417.1	RpL27	ribosomal protein L27, isoform A [Drosophila melanogaster]	10	135	1.121	0.78558	0.164786	0.104809
NP_524004.2	RpS9	ribosomal protein S9, isoform A [Drosophila melanogaster]	16	195	0.675	0.786025	-0.567041	0.104564
NP_651701.1	alph	alphabet, isoform E [Drosophila melanogaster]	9	374	1.179	0.789744	0.237564	0.102514
NP_724294.1	CG31673	uncharacterized protein Dmel_CG31673, isoform A [Drosophila melanogaster]	3	326	1.073	0.792777	0.10165	0.100849
NP_001014525.1	Vmat	vesicular monoamine transporter, isoform D [Drosophila melanogaster]	2	646	1.299	0.798388	0.377401	0.0977861
NP_648484.1	CG6084	CG6084, isoform A [Drosophila melanogaster]	1	316	0.81	0.800778	-0.304006	0.0964879
NP_525108.2	Gapdh1	glyceraldehyde 3 phosphate dehydrogenase 1, isoform A [Drosophila melanogaster]	9	332	1.258	0.801702	0.331132	0.0959869
NP_608487.1	galectin	galectin, isoform A [Drosophila melanogaster]	1	503	1.236	0.803118	0.305679	0.0952206
NP_650780.1	mRpL55	mitochondrial ribosomal protein L55 [Drosophila melanogaster]	5	107	0.827	0.80492	-0.274041	0.0942474
NP_727380.1	CG32694	uncharacterized protein Dmel_CG32694, isoform A [Drosophila melanogaster]	2	349	1.337	0.807014	0.418999	0.093119
NP_650775.2	GatA	Glutamyl-tRNA amidotransferase, subunit A [Drosophila melanogaster]	5	508	0.745	0.807125	-0.424688	0.0930592
NP_609408.1	LManII	lysosomal alpha-mannosidase II, isoform A [Drosophila melanogaster]	43	1080	0.853	0.808083	-0.229382	0.0925443
NP_650831.1	CG11407	uncharacterized protein Dmel_CG11407 [Drosophila melanogaster]	2	538	0.754	0.81416	-0.407364	0.08929
NP_650835.1	CG11447	uncharacterized protein Dmel_CG11447 [Drosophila melanogaster]	3	250	0.85	0.81525	-0.234465	0.0887094
NP_733144.3	Ald	aldolase, isoform K [Drosophila melanogaster]	43	361	1.134	0.816813	0.181421	0.0878775
NP_610524.1	Vamp7	Vesicle-associated membrane protein 7, isoform A [Drosophila melanogaster]	6	218	1.283	0.817942	0.359521	0.0872775
NP_609790.1	CG4278	CG4278 [Drosophila melanogaster]	2	292	0.842	0.819536	-0.248108	0.0864319
NP_650751.3	CG7718	CG7718 [Drosophila melanogaster]	9	494	0.802	0.81959	-0.318326	0.0864032
NP_650722.1	Vha100-2	vacuolar H[+] ATPase 100kD subunit 2, isoform B [Drosophila melanogaster]	32	834	1.104	0.82037	0.14274	0.0859903
NP_524387.1	Prx3	peroxiredoxin 3 [Drosophila melanogaster]	16	234	0.828	0.82131	-0.272297	0.0854927
NP_649840.1	IscU	Iron-sulfur cluster assembly enzyme [Drosophila melanogaster]	6	154	0.871	0.823084	-0.199255	0.0845556
NP_648182.1	CG7979	CG7979 [Drosophila melanogaster]	4	441	1.153	0.823639	0.205393	0.0842633
NP_001260180.1	Ndae1	Na[+]-driven anion exchanger 1, isoform G [Drosophila melanogaster]	1	1067	1.521	0.82854	0.60502	0.0816864
NP_609916.5	CG10602	uncharacterized protein Dmel_CG10602, isoform F [Drosophila melanogaster]	10	684	1.163	0.831864	0.217851	0.0799477
NP_001096849.1	CG32000	uncharacterized protein Dmel_CG32000, isoform H [Drosophila melanogaster]	6	1451	1.227	0.834909	0.295135	0.0783608
NP_476760.1	Top2	topoisomerase 2, isoform A [Drosophila melanogaster]	29	1447	0.821	0.835642	-0.284546	0.0779797
NP_524312.1	Adk3	adenylate kinase 3, isoform A [Drosophila melanogaster]	14	216	1.112	0.835985	0.153157	0.0778016
NP_611826.1	CG5532	CG5532, isoform A [Drosophila melanogaster]	2	112	1.237	0.837035	0.306846	0.0772564
NP_001260247.1	CG13392	uncharacterized protein Dmel_CG13392, isoform B [Drosophila melanogaster]	5	223	0.675	0.837161	-0.567041	0.077191
NP_610306.1	CG30491	uncharacterized protein Dmel_CG30491, isoform A [Drosophila melanogaster]	7	331	0.707	0.839014	-0.500218	0.0762309
NP_726060.3	CG42672	uncharacterized protein Dmel_CG42672, isoform M [Drosophila melanogaster]	1	1552	0.704	0.840591	-0.506353	0.0754153
NP_001262743.1	CG4662	CG4662, isoform F [Drosophila melanogaster]	4	505	1.392	0.84254	0.477159	0.0744097
NP_611538.1	ND-B14.7	NADH dehydrogenase (ubiquinone) B14.7 subunit [Drosophila melanogaster]	6	170	0.69	0.843761	-0.535332	0.0737804
NP_608445.2	CG1718	CG1718, isoform B [Drosophila melanogaster]	13	1714	0.849	0.84525	-0.236164	0.0730147
NP_476627.3	Mal-A1	maltase A1 [Drosophila melanogaster]	26	577	1.41	0.845688	0.495695	0.0727901
NP_001097185.2	RtGEF	Rho-type guanine nucleotide exchange factor, isoform D [Drosophila melanogaster]	2	973	1.351	0.847264	0.434028	0.0719815
NP_523433.2	slgA	sluggish A, isoform E [Drosophila melanogaster]	3	681	0.745	0.848271	-0.424688	0.0714656
NP_524696.2	Mgstl	microsomal glutathione S-transferase-like, isoform A [Drosophila melanogaster]	5	152	1.123	0.848347	0.167358	0.0714265
NP_652032.1	Sply	Sphingosine-1-phosphate lyase, isoform A [Drosophila melanogaster]	31	545	0.91	0.849936	-0.136062	0.0706137
NP_523774.1	RpL18A	ribosomal protein L18A [Drosophila melanogaster]	14	177	0.889	0.850002	-0.169745	0.0705801
NP_523366.2	Cyp1	cyclophilin 1 [Drosophila melanogaster]	12	227	0.926	0.851193	-0.110916	0.0699718
NP_649070.1	RpL26	ribosomal protein L26, isoform A [Drosophila melanogaster]	14	149	0.898	0.853001	-0.155213	0.0690506
NP_725830.1	CG15096	uncharacterized protein Dmel_CG15096, isoform B [Drosophila melanogaster]	1	475	1.143	0.853957	0.192825	0.0685638
NP_477090.1	Rab2	Rab2, isoform A [Drosophila melanogaster]	8	213	0.855	0.85545	-0.226004	0.0678052
NP_477371.1	Irp-1A	iron regulatory protein 1A [Drosophila melanogaster]	5	902	1.202	0.856218	0.265437	0.0674156
NP_725084.2	ERp60	ERp60 [Drosophila melanogaster]	50	489	1.3	0.856474	0.378512	0.0672859
NP_001287542.1	CG33970	uncharacterized protein Dmel_CG33970, isoform C [Drosophila melanogaster]	5	777	0.901	0.857577	-0.150401	0.0667269
NP_573331.1	CG7280	CG7280 [Drosophila melanogaster]	10	573	0.877	0.857973	-0.189351	0.0665265
NP_650916.1	CG17271	uncharacterized protein Dmel_CG17271, isoform A [Drosophila melanogaster]	4	281	0.761	0.859803	-0.394032	0.0656008
NP_649540.1	POLDIP2	polymerase (DNA-directed), delta interacting protein 2, isoform A [Drosophila melanogaster]	8	410	1.081	0.862236	0.112367	0.0643738
NP_573257.1	CG7772	CG7772 [Drosophila melanogaster]	2	164	0.709	0.864065	-0.496142	0.0634535
NP_524321.1	Ho	heme oxygenase [Drosophila melanogaster]	11	296	0.747	0.867475	-0.42082	0.0617429
NP_609709.1	mTTF	mitochondrial transcription termination factor [Drosophila melanogaster]	8	410	0.717	0.867815	-0.479955	0.0615727
NP_524880.2	Men	malic enzyme, isoform B [Drosophila melanogaster]	28	763	1.17	0.870605	0.226509	0.0601789
NP_610806.2	ZnT49B	zinc transporter 49B, isoform A [Drosophila melanogaster]	16	655	1.12	0.870957	0.163499	0.0600032
NP_732456.1	CG4572	CG4572, isoform A [Drosophila melanogaster]	16	482	1.157	0.871422	0.210389	0.0597716
NP_649650.2	CRAT	carnitine O-Acetyl-Transferase, isoform A [Drosophila melanogaster]	29	662	1.157	0.871991	0.210389	0.0594881
NP_723060.1	RpL37A	ribosomal protein L37A, isoform B [Drosophila melanogaster]	4	92	1.18	0.872466	0.238787	0.0592516
NP_001285723.1	Rack1	receptor of activated protein kinase C 1, isoform D [Drosophila melanogaster]	9	318	1.221	0.872602	0.288063	0.059184
NP_609401.2	CG5188	CG5188 [Drosophila melanogaster]	4	317	0.609	0.873681	-0.715486	0.0586473
NP_730226.3	Nc73EF	neural conserved at 73EF, isoform J [Drosophila melanogaster]	4	1105	1.283	0.873805	0.359521	0.0585856
NP_726038.1	Pu	punch, isoform A [Drosophila melanogaster]	10	324	1.121	0.874007	0.164786	0.0584849
NP_476632.1	RpS3	ribosomal protein S3, isoform A [Drosophila melanogaster]	21	246	1.315	0.87589	0.395063	0.0575506
NP_001245567.1	Pdp	pyruvate dehydrogenase phosphatase, isoform B [Drosophila melanogaster]	6	475	0.894	0.880238	-0.161653	0.0553998
NP_611981.2	CG3760	CG3760, isoform B [Drosophila melanogaster]	1	265	1.119	0.882578	0.16221	0.054247
NP_728665.1	Gk2	glycerol kinase 2, isoform C [Drosophila melanogaster]	15	576	0.76	0.882586	-0.395929	0.0542428
NP_001285957.1	lace	lace, isoform B [Drosophila melanogaster]	4	597	0.945	0.882808	-0.0816138	0.0541336
NP_788551.1	isoQC	iso glutaminyl cyclase, isoform A [Drosophila melanogaster]	4	352	1.246	0.886891	0.317304	0.0521298
NP_524331.2	Arp1	Actin-related protein 1 [Drosophila melanogaster]	10	376	1.277	0.888339	0.352759	0.0514213
NP_610945.1	CG8531	CG8531 [Drosophila melanogaster]	16	545	1.19	0.889771	0.250962	0.0507215
NP_001097372.1	Phb2	prohibitin 2, isoform E [Drosophila melanogaster]	36	338	0.88	0.891752	-0.184425	0.0497558
NP_651825.4	dj-1beta	dj-1beta [Drosophila melanogaster]	8	187	1.147	0.893879	0.197865	0.0487212
NP_001162894.1	Kr-h2	kruppel homolog 2, isoform B [Drosophila melanogaster]	9	276	1.06	0.893964	0.0840643	0.04868
NP_523792.2	FK506-bp2	FK506-binding protein 2 [Drosophila melanogaster]	8	108	1.33	0.895581	0.411426	0.047895
NP_610679.1	Tapdelta	Translocon-associated protein delta, isoform A [Drosophila melanogaster]	10	166	0.846	0.896656	-0.24127	0.0473741
NP_001036571.2	CG9380	CG9380, isoform G [Drosophila melanogaster]	10	850	0.863	0.897259	-0.212568	0.047082
NP_649679.1	Ccp84Ae	Ccp84Ae [Drosophila melanogaster]	14	208	1.185	0.89872	0.244887	0.0463757
NP_001097270.1	tou	toutatis, isoform E [Drosophila melanogaster]	3	3131	1.549	0.899027	0.631337	0.046227
NP_650163.2	CG4860	CG4860 [Drosophila melanogaster]	3	415	0.735	0.899332	-0.444184	0.0460799
NP_569856.2	CG5254	CG5254, isoform A [Drosophila melanogaster]	10	306	1.113	0.89974	0.154454	0.045883
NP_611731.1	EMC8-9	ER membrane protein complex 8-9 [Drosophila melanogaster]	3	203	0.831	0.900442	-0.26708	0.0455443
NP_730823.2	CG11739	uncharacterized protein Dmel_CG11739, isoform C [Drosophila melanogaster]	17	321	0.901	0.902328	-0.150401	0.0446358
NP_001247005.1	SpdS	spermidine synthase, isoform C [Drosophila melanogaster]	7	287	1.145	0.90462	0.195348	0.0435339
NP_652700.1	CG18858	uncharacterized protein Dmel_CG18858, isoform A [Drosophila melanogaster]	12	421	0.897	0.905278	-0.15682	0.0432179
NP_649769.1	Gie	GTPase indispensable for equal segregation of chromosomes, isoform A [Drosophila melanogaster]	2	186	0.918	0.906296	-0.123434	0.0427299
NP_995931.1	l(2)tid	lethal (2) tumorous imaginal discs, isoform C [Drosophila melanogaster]	2	507	1.202	0.906802	0.265437	0.0424875
NP_647873.2	Cpr64Ab	cuticular protein 64Ab [Drosophila melanogaster]	5	120	1.224	0.907015	0.291604	0.0423857
NP_476570.1	Gs1	glutamine synthetase 1, isoform B [Drosophila melanogaster]	18	399	1.138	0.907135	0.186501	0.0423282
NP_001260134.1	CG9531	CG9531, isoform B [Drosophila melanogaster]	5	323	1.114	0.907172	0.155749	0.0423102
NP_650720.1	Vha100-4	vacuolar H[+] ATPase 100kD subunit 4 [Drosophila melanogaster]	4	844	0.793	0.90802	-0.334607	0.0419045
NP_649099.1	CG9629	CG9629 [Drosophila melanogaster]	25	540	1.106	0.910606	0.145351	0.0406694
NP_611265.1	OstDelta	oligosaccharide transferase delta subunit, isoform A [Drosophila melanogaster]	40	634	1.138	0.914121	0.186501	0.0389961
NP_001163108.1	Ccs	copper chaperone for superoxide dismutase, isoform B [Drosophila melanogaster]	5	264	1.2	0.915663	0.263034	0.0382644
NP_001259853.1	mtRNApol	mitochondrial RNA polymerase, isoform B [Drosophila melanogaster]	4	1369	0.897	0.916877	-0.15682	0.0376888
NP_001261643.1	CG6767	CG6767, isoform F [Drosophila melanogaster]	1	369	0.808	0.917344	-0.307573	0.0374679
NP_649565.1	CG12170	uncharacterized protein Dmel_CG12170 [Drosophila melanogaster]	6	438	0.919	0.918834	-0.121863	0.0367627
NP_727284.1	Ppt1	Palmitoyl-protein thioesterase 1, isoform A [Drosophila melanogaster]	9	314	1.183	0.918947	0.24245	0.0367097
NP_001014650.2	jar	jaguar, isoform H [Drosophila melanogaster]	46	1268	1.187	0.920849	0.24732	0.0358116
NP_728548.1	CG13887	uncharacterized protein Dmel_CG13887, isoform C [Drosophila melanogaster]	16	228	1.187	0.92338	0.24732	0.0346193
NP_001245961.1	porin	porin, isoform D [Drosophila melanogaster]	41	282	0.89	0.923385	-0.168123	0.034617
NP_725669.1	Prosalpha5	proteasome alpha5 subunit, isoform A [Drosophila melanogaster]	3	244	1.206	0.924307	0.27023	0.0341838
NP_001033891.1	RpL13	ribosomal protein L13, isoform B [Drosophila melanogaster]	27	218	1.096	0.92611	0.132248	0.0333373
NP_725867.1	wbl	windbeutel, isoform A [Drosophila melanogaster]	10	257	1.275	0.928227	0.350497	0.0323456
NP_648664.2	CG8757	CG8757 [Drosophila melanogaster]	2	252	1.105	0.930962	0.144046	0.031068
NP_727016.1	RpL35	ribosomal protein L35, isoform A [Drosophila melanogaster]	6	123	0.891	0.931062	-0.166503	0.0310216
NP_726794.1	D2hgdh	D-2-hydroxyglutaric acid dehydrogenase, isoform B [Drosophila melanogaster]	14	533	1.172	0.93215	0.228973	0.0305144
NP_724340.1	nrv3	nervana 3, isoform D [Drosophila melanogaster]	1	311	1.391	0.932635	0.476122	0.0302885
NP_723771.4	Pih1D1	Pih1D1, isoform D [Drosophila melanogaster]	1	1094	1.285	0.932885	0.361768	0.030172
NP_524613.1	FeCH	ferrochelatase, isoform A [Drosophila melanogaster]	23	384	1.159	0.932995	0.212881	0.0301207
NP_724769.2	CG8026	CG8026, isoform D [Drosophila melanogaster]	6	322	0.901	0.934327	-0.150401	0.0295012
NP_001263104.1	Fer1HCH	ferritin 1 heavy chain homologue, isoform I [Drosophila melanogaster]	12	245	0.905	0.934568	-0.14401	0.0293893
NP_609362.1	CG5676	CG5676 [Drosophila melanogaster]	11	156	0.866	0.934754	-0.207561	0.0293028
NP_650189.1	Cyp9f2	Cyp9f2 [Drosophila melanogaster]	22	516	0.922	0.936323	-0.117161	0.0285744
NP_477229.3	Gs1l	GS1-like, isoform B [Drosophila melanogaster]	3	231	1.307	0.936494	0.386259	0.0284951
NP_732081.1	glob1	globin 1, isoform A [Drosophila melanogaster]	5	153	1.214	0.937046	0.279768	0.028239
NP_001259731.1	Alr	augmenter of liver regeneration, isoform B [Drosophila melanogaster]	5	266	1.146	0.937552	0.196607	0.0280047
NP_730454.2	CG15881	uncharacterized protein Dmel_CG15881, isoform A [Drosophila melanogaster]	3	136	1.293	0.939562	0.370722	0.0270746
NP_610737.1	EndoG	endonuclease G [Drosophila melanogaster]	9	310	0.87	0.940716	-0.200913	0.0265416
NP_001036756.2	CG34150	uncharacterized protein Dmel_CG34150 [Drosophila melanogaster]	3	137	0.764	0.942006	-0.388355	0.0259463
NP_649021.1	CG5506	CG5506 [Drosophila melanogaster]	9	180	0.892	0.942343	-0.164884	0.0257909
NP_649161.1	CG8004	CG8004 [Drosophila melanogaster]	2	269	0.7	0.943473	-0.514573	0.0252705
NP_476641.1	mle	maleless, isoform A [Drosophila melanogaster]	3	1293	1.26	0.943598	0.333424	0.0252129
NP_001036428.1	CG17683	uncharacterized protein Dmel_CG17683, isoform A [Drosophila melanogaster]	2	477	1.383	0.943861	0.467801	0.0250921
NP_001097354.1	Ufm1	Ubiquitin-fold modifier 1, isoform A [Drosophila melanogaster]	2	87	0.844	0.945315	-0.244685	0.0244234
NP_649301.1	CG11309	uncharacterized protein Dmel_CG11309, isoform A [Drosophila melanogaster]	11	358	0.896	0.945985	-0.158429	0.0241156
NP_732726.2	CG43343	uncharacterized protein Dmel_CG43343, isoform A [Drosophila melanogaster]	5	1304	1.194	0.946797	0.255803	0.0237433
NP_001285794.1	RpL7	ribosomal protein L7, isoform B [Drosophila melanogaster]	21	252	0.92	0.947199	-0.120294	0.0235586
NP_524870.1	fbl	fumble, isoform E [Drosophila melanogaster]	2	512	1.098	0.947468	0.134878	0.0234354
NP_611501.1	CG11110	uncharacterized protein Dmel_CG11110 [Drosophila melanogaster]	4	171	1.134	0.94769	0.181421	0.0233337
NP_788752.2	Ppn	papilin, isoform E [Drosophila melanogaster]	10	2898	0.922	0.953051	-0.117161	0.020884
NP_523975.1	RpL14	ribosomal protein L14 [Drosophila melanogaster]	18	166	0.92	0.953958	-0.120294	0.0204706
NP_001162804.1	AnxB10	annexin B10, isoform B [Drosophila melanogaster]	6	321	0.793	0.954476	-0.334607	0.0202352
NP_729802.1	CG32103	uncharacterized protein Dmel_CG32103, isoform B [Drosophila melanogaster]	10	583	0.878	0.954812	-0.187707	0.020082
NP_649004.1	CG7460	CG7460, isoform B [Drosophila melanogaster]	14	486	1.099	0.955255	0.136191	0.0198807
NP_650786.2	CG11779	uncharacterized protein Dmel_CG11779, isoform A [Drosophila melanogaster]	23	459	0.953	0.95629	-0.0694519	0.0194104
NP_649239.1	CG5059	CG5059, isoform A [Drosophila melanogaster]	7	201	0.901	0.956994	-0.150401	0.0190908
NP_611385.1	Jheh1	juvenile hormone epoxide hydrolase 1 [Drosophila melanogaster]	10	474	0.853	0.957071	-0.229382	0.019056
NP_609441.1	CG6415	CG6415 [Drosophila melanogaster]	9	405	0.927	0.959476	-0.109359	0.0179661
NP_726543.1	CG2316	CG2316, isoform C [Drosophila melanogaster]	19	730	1.145	0.959917	0.195348	0.0177664
NP_648144.3	CG7506	CG7506 [Drosophila melanogaster]	8	236	0.868	0.960687	-0.204233	0.017418
NP_001285414.1	phm	phantom, isoform B [Drosophila melanogaster]	1	574	1.37	0.961145	0.454176	0.0172113
NP_610995.1	SMC2	structural maintenance of chromosomes 2 [Drosophila melanogaster]	4	1179	0.867	0.961431	-0.205896	0.0170817
NP_476950.1	Rac1	Rac1, isoform A [Drosophila melanogaster]	4	192	1.116	0.962157	0.158337	0.016754
NP_651954.3	RpL10	ribosomal protein L10, isoform C [Drosophila melanogaster]	11	218	0.923	0.962281	-0.115597	0.0166981
NP_523905.2	Scsalpha	succinyl coenzyme A synthetase alpha subunit, isoform A [Drosophila melanogaster]	18	328	1.12	0.964083	0.163499	0.0158856
NP_524472.1	Rab7	Rab7, isoform A [Drosophila melanogaster]	9	207	0.856	0.964401	-0.224317	0.0157423
NP_610707.2	Twdlbeta	tweedlebeta [Drosophila melanogaster]	2	198	0.907	0.968786	-0.140826	0.0137723
NP_477025.1	pav	pavarotti [Drosophila melanogaster]	5	887	0.919	0.968963	-0.121863	0.0136929
NP_476964.1	RpS18	ribosomal protein S18, isoform A [Drosophila melanogaster]	17	152	1.294	0.96932	0.371838	0.0135327
NP_731494.1	CG31278	uncharacterized protein Dmel_CG31278, isoform A [Drosophila melanogaster]	3	238	0.935	0.96977	-0.0969617	0.0133312
NP_729634.1	CG6404	CG6404, isoform A [Drosophila melanogaster]	12	441	0.831	0.971126	-0.26708	0.0127245
NP_652724.1	CG3267	CG3267 [Drosophila melanogaster]	19	578	0.944	0.972238	-0.0831412	0.0122275
NP_609119.2	CG5958	CG5958 [Drosophila melanogaster]	12	294	1.284	0.972977	0.360645	0.0118973
NP_996213.1	CG33331	uncharacterized protein Dmel_CG33331 [Drosophila melanogaster]	7	342	1.106	0.974348	0.145351	0.0112859
NP_651246.2	Dis3	Dis3, isoform A [Drosophila melanogaster]	3	982	1.171	0.974379	0.227741	0.0112721
NP_001260465.1	UK114	UK114, isoform B [Drosophila melanogaster]	11	138	1.224	0.975596	0.291604	0.01073
NP_001036391.2	RpL5	ribosomal protein L5, isoform H [Drosophila melanogaster]	17	299	0.93	0.976679	-0.104697	0.0102483
NP_477161.1	RpL9	ribosomal protein L9, isoform A [Drosophila melanogaster]	7	190	0.869	0.976912	-0.202572	0.0101446
NP_476838.1	Cbp53E	calbindin 53E, isoform A [Drosophila melanogaster]	3	310	1.172	0.976972	0.228973	0.0101177
NP_611739.1	CG3800	CG3800, isoform A [Drosophila melanogaster]	6	165	0.848	0.977244	-0.237864	0.00999701
NP_725696.1	Rab4	Rab4, isoform A [Drosophila melanogaster]	4	213	0.937	0.978096	-0.093879	0.00961841
NP_001287563.1	tau	tau, isoform F [Drosophila melanogaster]	1	403	0.842	0.978217	-0.248108	0.00956501
NP_523742.2	LamC	lamin C, isoform A [Drosophila melanogaster]	44	621	1.218	0.97865	0.284514	0.00937247
NP_649139.1	Oat	ornithine aminotransferase precursor [Drosophila melanogaster]	15	431	0.937	0.978802	-0.093879	0.00930511
NP_610933.1	CG8323	CG8323 [Drosophila melanogaster]	6	303	1.045	0.979041	0.0635029	0.0091991
NP_725098.2	CG8298	CG8298, isoform C [Drosophila melanogaster]	6	596	1.059	0.979653	0.0827026	0.0089277
NP_731978.1	CG42542	uncharacterized protein Dmel_CG42542, isoform C [Drosophila melanogaster]	2	323	1.108	0.98052	0.147958	0.00854353
NP_001286079.1	Swip-1	Swiprosin-1, isoform B [Drosophila melanogaster]	5	217	1.118	0.980601	0.16092	0.00850763
NP_573196.1	CG5010	CG5010, isoform A [Drosophila melanogaster]	5	170	1.206	0.981038	0.27023	0.00831421
NP_523982.2	Prm	paramyosin, isoform A [Drosophila melanogaster]	41	879	0.93	0.981371	-0.104697	0.00816682
NP_610382.2	Mal-A5	maltase A5, isoform A [Drosophila melanogaster]	19	630	0.911	0.981425	-0.134477	0.00814286
NP_611548.1	CG9394	CG9394, isoform A [Drosophila melanogaster]	20	679	1.053	0.981508	0.0745054	0.00810612
NP_523561.1	CAH1	carbonic anhydrase 1 [Drosophila melanogaster]	4	270	0.905	0.981531	-0.14401	0.00809579
NP_001014515.1	14-3-3zeta	14-3-3zeta, isoform J [Drosophila melanogaster]	2	248	0.832	0.981571	-0.265345	0.00807821
NP_476631.1	RpL19	ribosomal protein L19, isoform A [Drosophila melanogaster]	18	203	1.085	0.981633	0.117695	0.00805083
NP_477281.1	Alas	aminolevulinate synthase [Drosophila melanogaster]	5	539	1.094	0.982113	0.129613	0.00783855
NP_610400.1	CG14749	uncharacterized protein Dmel_CG14749 [Drosophila melanogaster]	3	677	1.13	0.983075	0.176323	0.00741347
NP_524819.1	RpL12	ribosomal protein L12, isoform A [Drosophila melanogaster]	7	165	0.94	0.983639	-0.0892673	0.00716433
NP_001286259.1	Pal1	Peptidyl-alpha-hydroxyglycine-alpha-amidating lyase 1, isoform C [Drosophila melanogaster]	2	511	0.838	0.983924	-0.254978	0.00703853
NP_001137630.2	Pal1	Peptidyl-alpha-hydroxyglycine-alpha-amidating lyase 1, isoform D [Drosophila melanogaster]	1	541	1.1	0.983936	0.137504	0.0070332
NP_727973.1	CG4239	CG4239, isoform B [Drosophila melanogaster]	4	276	1.14	0.983942	0.189034	0.00703044
NP_476951.1	140up	upstream of RpII140, isoform A [Drosophila melanogaster]	8	261	1.034	0.984242	0.0482362	0.00689824
NP_723999.1	Mhc	myosin heavy chain, isoform C [Drosophila melanogaster]	4	1962	1.117	0.98464	0.159629	0.00672261
NP_649289.2	CG10512	uncharacterized protein Dmel_CG10512, isoform A [Drosophila melanogaster]	6	446	1.048	0.984742	0.0676387	0.00667766
NP_651893.1	betaGlu	beta glucuronidase [Drosophila melanogaster]	8	686	0.938	0.985083	-0.0923402	0.00652698
NP_511132.2	Hsc70-3	heat shock 70-kDa protein cognate 3, isoform B [Drosophila melanogaster]	64	656	0.912	0.985438	-0.132894	0.0063707
NP_651762.1	CG7920	CG7920, isoform A [Drosophila melanogaster]	33	477	0.938	0.985458	-0.0923402	0.00636209
NP_647932.1	LeuRS-m	Leucyl-tRNA synthetase, mitochondrial [Drosophila melanogaster]	8	869	0.934	0.986211	-0.0985055	0.00603037
NP_649527.1	CG11999	uncharacterized protein Dmel_CG11999 [Drosophila melanogaster]	9	216	1.183	0.986893	0.24245	0.00572982
NP_524180.1	alphaSnap	alpha soluble NSF attachment protein [Drosophila melanogaster]	11	292	0.85	0.986896	-0.234465	0.00572871
NP_728384.1	Cbs	cystathionine beta-synthase, isoform B [Drosophila melanogaster]	7	522	0.976	0.987472	-0.0350469	0.00547535
NP_524183.2	Las	lipoic acid synthase [Drosophila melanogaster]	4	377	1.066	0.988522	0.0922074	0.00501374
NP_612065.1	CG13890	uncharacterized protein Dmel_CG13890 [Drosophila melanogaster]	12	262	1.092	0.988606	0.126973	0.0049769
NP_524744.2	Rab18	Rab18 [Drosophila melanogaster]	2	197	0.948	0.988637	-0.077041	0.00496319
NP_649252.1	Pex16	peroxin 16 [Drosophila melanogaster]	5	341	0.952	0.988802	-0.0709665	0.00489058
NP_608525.1	shv	shriveled [Drosophila melanogaster]	19	354	1.115	0.989231	0.157044	0.00470239
NP_572304.5	CG3566	CG3566, isoform B [Drosophila melanogaster]	11	117	0.918	0.989765	-0.123434	0.00446782
NP_001259147.1	CG14806	uncharacterized protein Dmel_CG14806, isoform B [Drosophila melanogaster]	2	176	0.897	0.98992	-0.15682	0.0043998
NP_611175.1	ste24a	prenyl protease type I [Drosophila melanogaster]	6	451	1.112	0.990064	0.153157	0.00433656
NP_725534.1	Got1	glutamate oxaloacetate transaminase 1, isoform B [Drosophila melanogaster]	13	437	1.094	0.990178	0.129613	0.00428683
NP_572423.1	Ykt6	YKT6 v-SNARE [Drosophila melanogaster]	5	199	0.872	0.990254	-0.1976	0.00425343
NP_572996.1	Lsd-2	lipid storage droplet-2, isoform A [Drosophila melanogaster]	2	352	1.18	0.990698	0.238787	0.00405852
NP_001247120.1	Tm1	tropomyosin 1, isoform Q [Drosophila melanogaster]	6	250	1.07	0.990862	0.0976108	0.00398693
NP_648665.1	CG8745	CG8745 [Drosophila melanogaster]	2	494	0.933	0.990891	-0.100051	0.00397392
NP_001036474.2	l(2)01289	lethal (2) 01289, isoform H [Drosophila melanogaster]	1	840	1.043	0.991038	0.0607392	0.00390965
NP_651873.3	CG1635	CG1635 [Drosophila melanogaster]	9	448	1.076	0.991051	0.105678	0.00390382
NP_649888.1	CG8132	CG8132 [Drosophila melanogaster]	9	283	1.029	0.991084	0.041243	0.00388936
NP_648830.1	Mbs	myosin binding subunit, isoform E [Drosophila melanogaster]	2	377	1.353	0.991144	0.436162	0.0038631
NP_996274.1	Gdh	glutamate dehydrogenase, isoform F [Drosophila melanogaster]	2	549	1.055	0.991392	0.077243	0.00375443
NP_610922.1	CG8067	CG8067, isoform A [Drosophila melanogaster]	3	333	1.084	0.991595	0.116365	0.00366582
NP_733356.2	RpS7	ribosomal protein S7, isoform E [Drosophila melanogaster]	18	194	1.123	0.991637	0.167358	0.00364732
NP_996253.1	AnxB9	annexin B9, isoform C [Drosophila melanogaster]	3	324	0.799	0.991703	-0.323733	0.00361858
NP_732258.1	alt	aluminum tubes, isoform E [Drosophila melanogaster]	3	842	1.14	0.992148	0.189034	0.00342369
NP_001137767.1	CG42371	uncharacterized protein Dmel_CG42371 [Drosophila melanogaster]	2	87	0.964	0.992617	-0.0528949	0.00321817
NP_572420.1	spidey	spidey [Drosophila melanogaster]	11	321	0.93	0.992639	-0.104697	0.00320881
NP_733341.1	CG7943	CG7943, isoform B [Drosophila melanogaster]	4	332	1.041	0.992966	0.0579701	0.00306569
NP_649849.1	CAHbeta	carbonic anhydrase beta, isoform A [Drosophila melanogaster]	3	255	1.049	0.993258	0.0690147	0.00293781
NP_731495.1	CG31373	uncharacterized protein Dmel_CG31373 [Drosophila melanogaster]	2	196	1.052	0.993392	0.0731347	0.00287925
NP_001246525.1	Mtch	mitochondrial carrier homolog 1, isoform E [Drosophila melanogaster]	10	316	0.959	0.993565	-0.0603973	0.0028039
NP_001245568.1	Rab39	Rab39, isoform B [Drosophila melanogaster]	8	218	1.044	0.993661	0.0621217	0.00276183
NP_610310.2	CG2064	CG2064 [Drosophila melanogaster]	18	330	0.93	0.993861	-0.104697	0.00267439
NP_523886.1	RpL23A	ribosomal protein L23A [Drosophila melanogaster]	25	277	1.12	0.994	0.163499	0.00261377
NP_727948.1	CG9911	CG9911, isoform D [Drosophila melanogaster]	25	412	0.929	0.994123	-0.106249	0.00256008
NP_001036410.1	CG17715	uncharacterized protein Dmel_CG17715, isoform D [Drosophila melanogaster]	3	274	1.073	0.99427	0.10165	0.00249545
NP_001097729.1	CG9471	CG9471, isoform B [Drosophila melanogaster]	7	204	0.893	0.994336	-0.163268	0.00246675
NP_536791.1	l(2)37Bb	lethal (2) 37Bb [Drosophila melanogaster]	10	515	0.956	0.994415	-0.0649175	0.00243252
NP_001285541.1	CG13865	uncharacterized protein Dmel_CG13865, isoform C [Drosophila melanogaster]	11	266	1.118	0.99493	0.16092	0.00220735
NP_477034.1	tsr	twinstar [Drosophila melanogaster]	13	148	1.065	0.995028	0.0908534	0.00216457
NP_611751.1	l(2)k09913	lethal (2) k09913, isoform C [Drosophila melanogaster]	10	389	1.05	0.995223	0.0703893	0.0020798
NP_650891.1	att-ORFA	alternative testis transcripts open reading frame A, isoform A [Drosophila melanogaster]	6	365	1.07	0.995255	0.0976108	0.00206567
NP_572884.1	CG1673	CG1673 [Drosophila melanogaster]	7	443	1.063	0.995376	0.0881416	0.00201288
NP_787990.1	tkv	thickveins, isoform C [Drosophila melanogaster]	3	575	0.964	0.995656	-0.0528949	0.00189069
NP_650048.1	Tctp	translationally controlled tumor protein, isoform A [Drosophila melanogaster]	8	172	0.903	0.9957	-0.147202	0.00187167
NP_651601.1	Gp93	glycoprotein 93 [Drosophila melanogaster]	69	787	0.928	0.995887	-0.107803	0.00179006
NP_001262490.1	GC1	glutamate carrier 1, isoform B [Drosophila melanogaster]	13	321	1.099	0.996031	0.136191	0.00172718
NP_647875.1	Cpr64Ad	cuticular protein 64Ad [Drosophila melanogaster]	10	247	0.93	0.996099	-0.104697	0.00169759
NP_649599.1	CG1213	CG1213, isoform A [Drosophila melanogaster]	3	491	0.91	0.996124	-0.136062	0.00168648
NP_610831.1	CG13321	uncharacterized protein Dmel_CG13321, isoform A [Drosophila melanogaster]	11	286	0.908	0.996364	-0.139236	0.00158212
NP_727383.1	CG32694	uncharacterized protein Dmel_CG32694, isoform B [Drosophila melanogaster]	3	364	1.158	0.996375	0.211635	0.00157715
NP_726501.1	CG3760	CG3760, isoform A [Drosophila melanogaster]	1	271	1.127	0.996379	0.172488	0.00157555
NP_648499.1	mtTFB1	mitochondrial transcription factor B1 [Drosophila melanogaster]	3	330	0.94	0.996388	-0.0892673	0.00157156
NP_727119.1	RpL17	ribosomal protein L17, isoform B [Drosophila melanogaster]	16	186	1.044	0.996429	0.0621217	0.00155352
NP_609901.5	Jwa	Jwa [Drosophila melanogaster]	2	249	0.944	0.996433	-0.0831412	0.00155187
NP_611685.1	RpS16	ribosomal protein S16, isoform A [Drosophila melanogaster]	18	148	1.081	0.996499	0.112367	0.00152327
NP_647832.1	CG12006	uncharacterized protein Dmel_CG12006, isoform A [Drosophila melanogaster]	1	561	0.929	0.996575	-0.106249	0.00148985
NP_611071.1	Pex11	peroxin 11 [Drosophila melanogaster]	2	241	1.095	0.996747	0.130931	0.0014152
NP_001246053.1	ApepP	aminopeptidase P, isoform B [Drosophila melanogaster]	11	613	1.043	0.996825	0.0607392	0.00138099
NP_001261717.1	CG6084	CG6084, isoform D [Drosophila melanogaster]	1	316	0.955	0.996878	-0.0664274	0.00135807
NP_476566.1	Gpdh	glycerol 3 phosphate dehydrogenase, isoform C [Drosophila melanogaster]	27	353	1.034	0.996914	0.0482362	0.0013425
NP_996216.1	Tm1	tropomyosin 1, isoform L [Drosophila melanogaster]	4	284	1.075	0.997178	0.104337	0.00122752
NP_727418.1	flw	flapwing, isoform A [Drosophila melanogaster]	3	461	0.89	0.997295	-0.168123	0.00117649
NP_649887.1	RpL34b	ribosomal protein L34b, isoform A [Drosophila melanogaster]	5	168	0.938	0.997481	-0.0923402	0.00109524
NP_726176.1	Swim	secreted Wg-interacting molecule, isoform A [Drosophila melanogaster]	2	431	0.946	0.997552	-0.0800879	0.00106459
NP_648091.1	RpL18	ribosomal protein L18, isoform A [Drosophila melanogaster]	10	188	0.958	0.997627	-0.0619024	0.00103162
NP_001260099.1	cl	clot, isoform C [Drosophila melanogaster]	12	126	0.942	0.997847	-0.086201	0.000936001
NP_648884.1	Cpr72Ec	cuticular protein 72Ec [Drosophila melanogaster]	26	429	0.947	0.997884	-0.0785637	0.000920049
NP_651456.1	Dak1	Dak1 [Drosophila melanogaster]	13	253	1.033	0.997903	0.0468403	0.0009118
NP_523663.1	Pgi	phosphoglucose isomerase, isoform A [Drosophila melanogaster]	19	558	0.923	0.997939	-0.115597	0.000895956
NP_611045.1	CG8187	CG8187 [Drosophila melanogaster]	6	376	1.057	0.998001	0.0799754	0.000869002
NP_001036734.1	CG17271	uncharacterized protein Dmel_CG17271, isoform B [Drosophila melanogaster]	4	270	1.133	0.998051	0.180148	0.000847093
NP_610774.3	Cpr49Ae	cuticular protein 49Ae [Drosophila melanogaster]	6	134	1.167	0.998125	0.222805	0.000814905
NP_651460.2	RpL34a	ribosomal protein L34a, isoform A [Drosophila melanogaster]	2	162	0.954	0.998126	-0.0679388	0.000814652
NP_650962.1	CG5919	CG5919, isoform A [Drosophila melanogaster]	5	256	1.05	0.998264	0.0703893	0.000754374
NP_620470.1	26-29-p	26-29kD-proteinase [Drosophila melanogaster]	19	549	1.034	0.998304	0.0482362	0.00073711
NP_649712.1	CG1227	CG1227, isoform A [Drosophila melanogaster]	4	320	1.071	0.998379	0.0989585	0.000704773
NP_001104429.2	RpL15	ribosomal protein L15, isoform E [Drosophila melanogaster]	6	204	1.038	0.998506	0.0538064	0.000649427
NP_608326.1	CG14207	uncharacterized protein Dmel_CG14207, isoform A [Drosophila melanogaster]	1	183	0.97	0.998552	-0.0439433	0.000629412
NP_001285895.1	RpL24	ribosomal protein L24, isoform B [Drosophila melanogaster]	15	155	0.953	0.998612	-0.0694519	0.000603252
NP_787986.1	Rtnl1	Reticulon-like1, isoform D [Drosophila melanogaster]	1	224	0.957	0.998793	-0.0634092	0.000524601
NP_523526.1	Trx-2	thioredoxin-2, isoform A [Drosophila melanogaster]	7	106	1.079	0.998798	0.109695	0.000522282
NP_001261768.1	sti	sticky, isoform B [Drosophila melanogaster]	5	1858	0.91	0.998834	-0.136062	0.0005066
NP_001260675.1	nrv3	nervana 3, isoform E [Drosophila melanogaster]	1	313	1.073	0.998873	0.10165	0.000489695
NP_652065.1	CG5707	CG5707, isoform A [Drosophila melanogaster]	7	357	1.055	0.998912	0.077243	0.000472787
NP_730923.1	Cerk	ceramide kinase, isoform A [Drosophila melanogaster]	7	687	0.969	0.998926	-0.0454314	0.000466628
NP_650318.1	Dip-B	dipeptidase B, isoform A [Drosophila melanogaster]	23	508	1.014	0.999002	0.0200577	0.000433453
NP_728308.1	Nup205	nucleoporin 205kD, isoform B [Drosophila melanogaster]	8	2090	0.962	0.999134	-0.0558912	0.000376335
NP_525002.1	Jafrac2	thioredoxin peroxidase 2, isoform A [Drosophila melanogaster]	8	242	0.957	0.999143	-0.0634092	0.000372176
NP_001285253.1	CG9512	CG9512, isoform B [Drosophila melanogaster]	22	623	1.047	0.999154	0.0662614	0.000367532
NP_001261269.1	nSyb	neuronal synaptobrevin, isoform J [Drosophila melanogaster]	10	206	1.057	0.999252	0.0799754	0.000325166
NP_651876.1	RpL6	ribosomal protein L6, isoform B [Drosophila melanogaster]	22	262	1.054	0.999306	0.0758749	0.000301297
NP_524726.1	RpL8	ribosomal protein L8, isoform A [Drosophila melanogaster]	18	256	1.056	0.999333	0.0786098	0.000289614
NP_001261040.1	GstS1	glutathione S transferase S1, isoform D [Drosophila melanogaster]	1	250	0.917	0.999353	-0.125006	0.000281229
NP_724018.1	AspRS-m	Aspartyl-tRNA synthetase, mitochondrial, isoform A [Drosophila melanogaster]	13	1082	0.977	0.999363	-0.0335695	0.000276602
NP_727094.1	RpL7A	ribosomal protein L7A, isoform A [Drosophila melanogaster]	20	271	1.038	0.999394	0.0538064	0.000263264
NP_524538.2	RpL4	ribosomal protein L4 [Drosophila melanogaster]	33	401	0.963	0.999499	-0.0543923	0.000217688
NP_649133.1	Lon	Lon protease, isoform A [Drosophila melanogaster]	1	1006	0.948	0.999504	-0.077041	0.000215389
NP_650944.3	CG5793	CG5793, isoform D [Drosophila melanogaster]	2	220	0.983	0.999549	-0.0247367	0.000195968
NP_610183.1	CG7791	CG7791 [Drosophila melanogaster]	9	699	0.986	0.999596	-0.0203404	0.000175515
NP_651364.1	CG11858	uncharacterized protein Dmel_CG11858 [Drosophila melanogaster]	3	130	1.061	0.999605	0.0854247	0.000171517
NP_650957.1	CG3337	CG3337, isoform A [Drosophila melanogaster]	3	204	1.04	0.999656	0.0565835	0.000149374
NP_647730.1	CG16985	uncharacterized protein Dmel_CG16985 [Drosophila melanogaster]	3	149	0.982	0.999691	-0.0262051	0.000134364
NP_523849.3	Nurf-38	nucleosome remodeling factor - 38kD, isoform A [Drosophila melanogaster]	2	338	1.019	0.999699	0.0271541	0.000130919
NP_724597.1	CG18812	uncharacterized protein Dmel_CG18812, isoform C [Drosophila melanogaster]	3	540	0.979	0.999716	-0.0306192	0.000123215
NP_001034042.1	GstD1	glutathione S transferase D1, isoform B [Drosophila melanogaster]	8	209	0.94	0.999728	-0.0892673	0.000118136
NP_788024.1	CG33129	uncharacterized protein Dmel_CG33129, isoform A [Drosophila melanogaster]	3	237	1.049	0.999732	0.0690147	0.000116335
NP_001247375.1	Npc2g	Niemann-Pick type C-2g, isoform B [Drosophila melanogaster]	3	159	1.034	0.999739	0.0482362	0.000113382
NP_001027180.1	fabp	fatty acid binding protein, isoform B [Drosophila melanogaster]	18	130	1.03	0.999746	0.0426443	0.000110494
NP_572241.2	Sirt4	sirtuin 4, isoform C [Drosophila melanogaster]	2	312	1.044	0.99983	0.0621217	7.36993e-05
NP_732309.1	14-3-3epsilon	14-3-3epsilon, isoform A [Drosophila melanogaster]	12	262	0.933	0.999872	-0.100051	5.5805e-05
NP_649411.1	CG14450	uncharacterized protein Dmel_CG14450, isoform A [Drosophila melanogaster]	4	372	1.024	0.999885	0.0342157	4.97489e-05
NP_724982.1	CG30016	uncharacterized protein Dmel_CG30016 [Drosophila melanogaster]	2	113	1.056	0.999895	0.0786098	4.54462e-05
NP_524151.2	Ugt	UDP-glucose-glycoprotein glucosyltransferase [Drosophila melanogaster]	43	1548	0.98	0.999914	-0.0291463	3.7524e-05
NP_001162645.1	CG2918	CG2918, isoform B [Drosophila melanogaster]	60	923	1.028	0.999919	0.0398403	3.52418e-05
NP_726686.1	RpL36	ribosomal protein L36, isoform B [Drosophila melanogaster]	9	115	0.979	0.999923	-0.0306192	3.32869e-05
NP_001246503.1	key	kenny, isoform B [Drosophila melanogaster]	2	389	1.03	0.999928	0.0426443	3.12089e-05
NP_609912.1	CG17597	uncharacterized protein Dmel_CG17597, isoform A [Drosophila melanogaster]	8	407	1.026	0.999936	0.0370307	2.7735e-05
NP_650586.2	AdSL	adenylosuccinate lyase [Drosophila melanogaster]	9	481	0.982	0.999945	-0.0262051	2.38488e-05
NP_648446.1	CG7616	CG7616, isoform A [Drosophila melanogaster]	6	557	0.983	0.999952	-0.0247367	2.10253e-05
NP_651776.2	CG1983	CG1983, isoform A [Drosophila melanogaster]	4	254	1.008	0.999953	0.0114956	2.05377e-05
NP_001246837.1	Rab8	Rab8, isoform C [Drosophila melanogaster]	6	207	1.021	0.99996	0.0299829	1.74108e-05
NP_001163614.1	CG42542	uncharacterized protein Dmel_CG42542, isoform E [Drosophila melanogaster]	4	503	0.993	0.999971	-0.0101344	1.24637e-05
NP_610934.1	CG18327	uncharacterized protein Dmel_CG18327, isoform A [Drosophila melanogaster]	3	304	1.022	0.999972	0.0313952	1.2256e-05
NP_001285979.1	CaBP1	calcium-binding protein 1, isoform B [Drosophila melanogaster]	19	433	1.031	0.999972	0.0440443	1.20434e-05
NP_001285282.1	CG8128	CG8128, isoform B [Drosophila melanogaster]	6	330	1.014	0.999976	0.0200577	1.0596e-05
NP_650477.1	AOX3	aldehyde oxidase 3, isoform A [Drosophila melanogaster]	34	1254	1.006	0.999983	0.00863031	7.30483e-06
NP_724244.1	pr	purple [Drosophila melanogaster]	3	168	0.975	0.999984	-0.0365259	6.90782e-06
NP_476735.1	Sod1	superoxide dismutase 1, isoform A [Drosophila melanogaster]	14	153	1.016	0.999984	0.0229004	6.83033e-06
NP_610523.2	CG1665	CG1665 [Drosophila melanogaster]	17	340	0.989	0.999989	-0.0159576	4.92126e-06
NP_477228.1	Gs1l	GS1-like, isoform A [Drosophila melanogaster]	2	231	1.022	0.99999	0.0313952	4.31332e-06
NP_724889.2	14-3-3zeta	14-3-3zeta, isoform G [Drosophila melanogaster]	3	248	0.969	0.99999	-0.0454314	4.22926e-06
NP_477445.1	Manf	mesencephalic astrocyte-derived neurotrophic factor [Drosophila melanogaster]	8	173	1.03	0.999991	0.0426443	4.06677e-06
NP_728841.2	RpL28	ribosomal protein L28, isoform G [Drosophila melanogaster]	22	144	0.991	0.999992	-0.013043	3.34168e-06
NP_524316.1	RpL3	ribosomal protein L3, isoform A [Drosophila melanogaster]	31	416	1.008	0.999993	0.0114956	3.06822e-06
NP_609588.1	CG6180	CG6180 [Drosophila melanogaster]	10	257	0.995	0.999993	-0.00723157	2.93394e-06
NP_726675.3	svr	silver, isoform H [Drosophila melanogaster]	3	1437	0.986	0.999996	-0.0203404	1.9135e-06
NP_001259561.1	RpL37a	ribosomal protein L37a, isoform B [Drosophila melanogaster]	6	93	1.015	0.999997	0.0214797	1.37833e-06
NP_609973.1	CG10194	uncharacterized protein Dmel_CG10194 [Drosophila melanogaster]	6	351	0.993	0.999997	-0.0101344	1.23946e-06
NP_727690.1	RpS15Aa	ribosomal protein S15Aa, isoform A [Drosophila melanogaster]	7	130	1.005	0.999997	0.0071955	1.19891e-06
NP_524103.2	SsRbeta	signal sequence receptor beta [Drosophila melanogaster]	4	190	0.991	0.999998	-0.013043	8.05615e-07
NP_610846.2	CG4627	CG4627 [Drosophila melanogaster]	2	204	0.992	0.999998	-0.011588	7.74511e-07
NP_477134.1	RpL22	ribosomal protein L22 [Drosophila melanogaster]	24	299	1.015	0.999999	0.0214797	5.28953e-07
NP_573096.1	CG8931	CG8931 [Drosophila melanogaster]	3	421	1.005	0.999999	0.0071955	4.41795e-07
NP_572836.1	CG32649	uncharacterized protein Dmel_CG32649 [Drosophila melanogaster]	21	661	0.997	0.999999	-0.00433459	3.07482e-07
NP_649539.1	RpL35A	ribosomal protein L35A [Drosophila melanogaster]	7	157	0.995	1	-0.00723157	1.79006e-07
NP_726489.2	CG44247	uncharacterized protein Dmel_CG44247, isoform A [Drosophila melanogaster]	7	536	1.005	1	0.0071955	7.83172e-08
NP_001246063.1	GCS2beta	glucosidase 2 beta subunit, isoform B [Drosophila melanogaster]	22	548	1.006	1	0.00863031	1.95246e-08
NP_001263106.1	Fer2LCH	ferritin 2 light chain homologue, isoform E [Drosophila melanogaster]	19	236	0.999	1	-0.00144342	2.41238e-10
NP_001015389.1	Scp1	sarcoplasmic calcium-binding protein 1, isoform A [Drosophila melanogaster]	21	189	0.999	1	-0.00144342	1.06741e-11

## Sheet: Sod2 vs WT as mitomax
Sod2 (SD) vs WT (F) proteins with >1 unique peptide and common with MitoMax
Accession	Proteins	Description	# Unique Peptides	# AAs	Abundance Ratio: (SD) / (F)	Abundance Ratio P-Value: (SD) / (F)	Abundance Ratio: log2 (SD) / (F)	Abundance Ratio P-Value: -log10-(SD) / (F)
NP_001188535.1	moody	moody, isoform C [Drosophila melanogaster]	4	633	2.294	1.01667e-06	1.19787	5.99282
NP_001033803.3	PMCA	plasma membrane calcium ATPase, isoform J [Drosophila melanogaster]	8	1255	1.872	2.04235e-06	0.90458	5.68987
NP_729446.1	Argk	arginine kinase, isoform A [Drosophila melanogaster]	8	562	4.006	3.6793e-05	2.00216	4.43424
NP_001097174.1	Fas3	fasciclin 3, isoform D [Drosophila melanogaster]	4	577	2.382	4.3098e-05	1.25217	4.36554
NP_001246231.1	Etf-QO	electron transfer flavoprotein-ubiquinone oxidoreductase, isoform B [Drosophila melanogaster]	28	604	0.611	6.36562e-05	-0.710756	4.19616
NP_536744.2	mtSSB	mitochondrial single stranded DNA-binding protein [Drosophila melanogaster]	7	146	0.436	7.19763e-05	-1.1976	4.14281
NP_524875.1	arg	arginase [Drosophila melanogaster]	11	351	2.587	8.84489e-05	1.37128	4.05331
NP_652045.1	CG13397	uncharacterized protein Dmel_CG13397, isoform A [Drosophila melanogaster]	4	778	0.136	0.000113045	-2.87832	3.94675
NP_524611.1	Ef1alpha100E	elongation factor 1alpha100E, isoform A [Drosophila melanogaster]	11	462	4.246	0.00011847	2.0861	3.92639
NP_476779.1	Uro	urate oxidase [Drosophila melanogaster]	21	352	0.185	0.000120908	-2.4344	3.91755
NP_787998.1	Akap200	A kinase anchor protein 200, isoform D [Drosophila melanogaster]	11	837	9.668	0.000134393	3.27322	3.87162
NP_001261317.1	zormin	zormin, isoform J [Drosophila melanogaster]	30	3664	3.027	0.000143381	1.59789	3.84351
NP_001285505.1	CG1532	CG1532, isoform B [Drosophila melanogaster]	6	288	0.617	0.000145733	-0.696658	3.83644
NP_650333.1	CG9920	CG9920 [Drosophila melanogaster]	9	102	8.259	0.000147106	3.04597	3.83237
NP_611133.1	CG7813	CG7813 [Drosophila melanogaster]	18	734	8.663	0.000157968	3.11487	3.80143
NP_477459.1	Akap200	A kinase anchor protein 200, isoform B [Drosophila melanogaster]	1	372	2.882	0.000165636	1.52707	3.78085
NP_572212.1	TrxT	thioredoxin T, isoform A [Drosophila melanogaster]	2	157	7.704	0.000169396	2.94561	3.7711
NP_001188562.1	CG15347	uncharacterized protein Dmel_CG15347, isoform B [Drosophila melanogaster]	5	229	0.171	0.000176578	-2.54793	3.75306
NP_650042.2	CG4706	CG4706 [Drosophila melanogaster]	9	783	8.033	0.000236826	3.00594	3.62557
NP_787122.1	Ank	ankyrin, isoform B [Drosophila melanogaster]	34	1549	1.993	0.000238664	0.994942	3.62221
NP_732572.1	Atpalpha	Na pump alpha subunit, isoform A [Drosophila melanogaster]	7	1041	1.432	0.000280135	0.518031	3.55263
NP_733183.1	CG31075	uncharacterized protein Dmel_CG31075, isoform A [Drosophila melanogaster]	18	485	2.657	0.000300347	1.4098	3.52238
NP_001287138.1	CG10585	uncharacterized protein Dmel_CG10585, isoform B [Drosophila melanogaster]	4	448	1.636	0.000300423	0.710173	3.52227
NP_524174.1	fln	flightin, isoform A [Drosophila melanogaster]	19	182	6.089	0.000301624	2.60621	3.52053
NP_001260509.1	Cyt-c-d	cytochrome c distal, isoform B [Drosophila melanogaster]	4	105	7.526	0.000317116	2.91188	3.49878
NP_476925.1	Sod2	superoxide dismutase 2 (Mn), isoform A [Drosophila melanogaster]	13	217	0.084	0.000324626	-3.57347	3.48862
NP_610087.2	CG9257	CG9257 [Drosophila melanogaster]	15	347	2.309	0.00033204	1.20727	3.47881
NP_611341.1	CG10924	uncharacterized protein Dmel_CG10924, isoform A [Drosophila melanogaster]	20	638	2.361	0.000345551	1.2394	3.46149
NP_524049.1	Klc	kinesin light chain, isoform A [Drosophila melanogaster]	16	508	2.255	0.000353255	1.17313	3.45191
NP_609287.3	Mco1	multicopper oxidase-1, isoform A [Drosophila melanogaster]	6	959	0.433	0.000354508	-1.20756	3.45037
NP_001261019.1	Strn-Mlck	Stretchin-Mlck, isoform U [Drosophila melanogaster]	41	8255	5.147	0.000365667	2.36373	3.43691
NP_524661.1	CdsA	CDP diglyceride synthetase, isoform A [Drosophila melanogaster]	8	447	1.678	0.000387507	0.746743	3.41172
NP_727251.1	Trxr-1	thioredoxin reductase-1, isoform B [Drosophila melanogaster]	19	596	0.683	0.000392068	-0.550043	3.40664
NP_727290.1	Moe	moesin, isoform B [Drosophila melanogaster]	42	649	0.613	0.000418801	-0.706041	3.37799
NP_996113.2	Lmpt	limpet, isoform K [Drosophila melanogaster]	68	2147	2.612	0.000445791	1.38515	3.35087
NP_001285102.1	CG2145	CG2145, isoform B [Drosophila melanogaster]	15	592	3.691	0.000462267	1.88401	3.33511
NP_524065.1	Fbp1	Fat body protein 1, isoform A [Drosophila melanogaster]	1	1029	7.248	0.00048018	2.85758	3.3186
NP_648467.1	CG6140	CG6140, isoform A [Drosophila melanogaster]	10	470	3.771	0.000597905	1.91495	3.22337
NP_001189251.1	CG42668	uncharacterized protein Dmel_CG42668, isoform K [Drosophila melanogaster]	18	956	1.768	0.000598512	0.822118	3.22293
NP_650648.3	Pxt	Peroxinectin-like [Drosophila melanogaster]	31	809	0.305	0.000645643	-1.71312	3.19001
NP_727668.2	CG32638	uncharacterized protein Dmel_CG32638 [Drosophila melanogaster]	2	159	2.011	0.000682434	1.00791	3.16594
NP_725790.2	CG5174	CG5174, isoform M [Drosophila melanogaster]	2	202	2.018	0.000686682	1.01293	3.16324
NP_001261474.1	ImpL3	Ecdysone-inducible gene L3, isoform B [Drosophila melanogaster]	4	332	2.672	0.000690519	1.41792	3.16082
NP_001245921.1	CG18304	uncharacterized protein Dmel_CG18304, isoform B [Drosophila melanogaster]	32	1819	4.499	0.00071492	2.1696	3.14574
NP_523795.2	betaTub56D	beta-Tubulin at 56D, isoform B [Drosophila melanogaster]	5	447	3.512	0.00072065	1.81229	3.14228
NP_001259282.1	CG34417	uncharacterized protein Dmel_CG34417, isoform T [Drosophila melanogaster]	89	5182	4.579	0.000720995	2.19503	3.14207
NP_001286040.1	Acp36DE	accessory gland protein 36DE, isoform B [Drosophila melanogaster]	55	912	7.371	0.000747959	2.88186	3.12612
NP_610892.1	S-Lap5	Sperm-Leucylaminopeptidase 5 [Drosophila melanogaster]	5	549	6.889	0.000775617	2.78429	3.11035
NP_001097744.1	Ugt86Dd	Ugt86Dd [Drosophila melanogaster]	14	517	0.166	0.000778141	-2.59074	3.10894
NP_731489.2	pug	pugilist, isoform B [Drosophila melanogaster]	47	968	2.154	0.000781421	1.10702	3.10712
NP_723955.2	CG42817	uncharacterized protein Dmel_CG42817, isoform A [Drosophila melanogaster]	5	1215	1.907	0.000782682	0.931305	3.10641
NP_001036692.1	ps	pasilla, isoform F [Drosophila melanogaster]	15	572	2.215	0.000848775	1.14731	3.07121
NP_609215.3	CG7627	CG7627, isoform A [Drosophila melanogaster]	20	1355	0.586	0.000878722	-0.771027	3.05615
NP_733237.1	mino	minotaur, isoform C [Drosophila melanogaster]	17	786	0.624	0.000912729	-0.680382	3.03966
NP_725882.1	SdhA	succinate dehydrogenase, subunit A (flavoprotein), isoform C [Drosophila melanogaster]	41	661	0.527	0.000932067	-0.924125	3.03055
NP_001260364.1	Porin2	Porin2, isoform B [Drosophila melanogaster]	13	293	5.509	0.000963761	2.46179	3.01603
NP_647924.2	CG18418	uncharacterized protein Dmel_CG18418 [Drosophila melanogaster]	2	311	6.45	0.00101514	2.6893	2.99347
NP_723104.2	Hsp60C	heat shock protein 60C, isoform A [Drosophila melanogaster]	26	576	7.851	0.00103954	2.97288	2.98316
NP_001246631.1	axo	axotactin, isoform C [Drosophila melanogaster]	1	2179	6.61	0.00108504	2.72465	2.96455
NP_725824.1	CG15093	uncharacterized protein Dmel_CG15093, isoform A [Drosophila melanogaster]	8	324	0.519	0.00109385	-0.946194	2.96104
NP_608912.1	Cyp28d1	Cyp28d1 [Drosophila melanogaster]	26	502	1.828	0.00112005	0.870266	2.95076
NP_610213.1	tomboy40	tomboy40 [Drosophila melanogaster]	4	340	3.084	0.00116246	1.6248	2.93462
NP_660192.1	CG4098	CG4098 [Drosophila melanogaster]	3	307	5.17	0.00117775	2.37016	2.92895
NP_001162875.1	Rtnl1	Reticulon-like1, isoform H [Drosophila melanogaster]	24	607	5.249	0.00118092	2.39204	2.92778
NP_511102.3	Yp2	yolk protein 2, isoform A [Drosophila melanogaster]	34	442	0.112	0.00122155	-3.15843	2.91309
NP_648068.1	CG10063	uncharacterized protein Dmel_CG10063 [Drosophila melanogaster]	8	212	7.241	0.00126557	2.85619	2.89771
NP_651727.1	CG7834	CG7834, isoform A [Drosophila melanogaster]	26	253	0.564	0.00130198	-0.826233	2.8854
NP_730270.1	CG32174	uncharacterized protein Dmel_CG32174, isoform B [Drosophila melanogaster]	4	268	0.536	0.00134234	-0.899695	2.87214
NP_001246694.1	Hsp23	heat shock protein 23, isoform B [Drosophila melanogaster]	14	186	3.693	0.00144059	1.88479	2.84146
NP_610156.1	CG3107	CG3107, isoform A [Drosophila melanogaster]	21	1034	0.368	0.00145022	-1.44222	2.83857
NP_001285556.1	Lsp1beta	larval serum protein 1 beta, isoform B [Drosophila melanogaster]	9	789	9.303	0.00145524	3.2177	2.83706
NP_599138.3	Dhod	dihydroorotate dehydrogenase, isoform D [Drosophila melanogaster]	23	405	0.611	0.00146547	-0.710756	2.83402
NP_726881.1	Rala	Ras-like protein A, isoform B [Drosophila melanogaster]	3	197	0.487	0.00149949	-1.03801	2.82406
NP_001014681.2	Doa	darkener of apricot, isoform P [Drosophila melanogaster]	2	2045	6.501	0.00152124	2.70066	2.8178
NP_727901.1	Chc	clathrin heavy chain, isoform B [Drosophila melanogaster]	47	1678	3.25	0.00152501	1.70044	2.81673
NP_511148.2	Yp3	yolk protein 3, isoform A [Drosophila melanogaster]	31	420	0.087	0.0015408	-3.52284	2.81225
NP_608578.1	CG5080	CG5080, isoform B [Drosophila melanogaster]	20	554	1.845	0.00158139	0.883621	2.80096
NP_731505.1	fau	fau [Drosophila melanogaster]	7	131	5.222	0.00160538	2.3846	2.79442
NP_569875.2	CG3699	CG3699 [Drosophila melanogaster]	15	251	2.19	0.00179015	1.13093	2.74711
NP_001245922.1	uif	uninflatable, isoform D [Drosophila melanogaster]	32	3589	4.17	0.00184278	2.06005	2.73453
NP_523784.2	Pepck	phosphoenolpyruvate carboxykinase [Drosophila melanogaster]	12	647	3.233	0.00188164	1.69287	2.72546
NP_477432.3	Taz	tafazzin, isoform A [Drosophila melanogaster]	7	378	2.014	0.00202301	1.01006	2.694
NP_001285071.1	Yp1	yolk protein 1, isoform B [Drosophila melanogaster]	34	439	0.139	0.00205238	-2.84684	2.68774
NP_611002.3	Cyp6a20	Cyp6a20 [Drosophila melanogaster]	16	501	1.93	0.00207523	0.948601	2.68293
NP_511087.1	Cp36	chorion protein 36 [Drosophila melanogaster]	12	284	0.172	0.00207851	-2.53952	2.68225
NP_001138085.1	CG4836	CG4836, isoform E [Drosophila melanogaster]	4	1224	8.694	0.00209797	3.12002	2.6782
NP_001188515.1	PMCA	plasma membrane calcium ATPase, isoform P [Drosophila melanogaster]	4	1194	2.497	0.00215791	1.3202	2.66597
NP_650501.1	CG4546	CG4546 [Drosophila melanogaster]	11	457	5.829	0.00216513	2.54325	2.66452
NP_726111.1	Tango11	transport and golgi organization 11, isoform A [Drosophila melanogaster]	7	277	3.832	0.002203	1.9381	2.65699
NP_726453.1	Letm1	LETM1 ortholog, isoform A [Drosophila melanogaster]	76	1013	1.634	0.00222886	0.708408	2.65192
NP_732020.2	CG5044	CG5044, isoform B [Drosophila melanogaster]	8	386	0.683	0.00233348	-0.550043	2.632
NP_524474.1	Hsp68	heat shock protein 68 [Drosophila melanogaster]	20	635	7.667	0.00236606	2.93866	2.62597
NP_572162.2	CG3626	CG3626 [Drosophila melanogaster]	7	939	1.488	0.00237487	0.573375	2.62436
NP_651049.3	AP-2mu	adaptor protein complex 2, mu subunit, isoform B [Drosophila melanogaster]	12	437	2.046	0.00238464	1.03281	2.62258
NP_476934.2	Myo61F	myosin 61F, isoform D [Drosophila melanogaster]	61	1052	0.325	0.00241472	-1.62149	2.61713
NP_523509.2	Pvr	PDGF- and VEGF-receptor related, isoform A [Drosophila melanogaster]	1	1509	3.173	0.0024303	1.66585	2.61434
NP_650572.2	Cctgamma	cctgamma, isoform A [Drosophila melanogaster]	26	544	1.753	0.00255794	0.809826	2.59211
NP_651003.1	Cchl	cytochrome c heme lyase, isoform A [Drosophila melanogaster]	17	281	2.231	0.00263331	1.15769	2.5795
NP_001260426.1	Vha68-1	vacuolar H[+] ATPase 68kD subunit 1, isoform B [Drosophila melanogaster]	17	614	1.968	0.00265324	0.97673	2.57622
NP_476768.1	trp	transient receptor potential, isoform A [Drosophila melanogaster]	41	1275	3.156	0.00278796	1.6581	2.55471
NP_001285108.1	Rpt3	regulatory particle triple-A ATPase 3, isoform B [Drosophila melanogaster]	14	413	1.946	0.00282513	0.960512	2.54896
NP_727464.1	CG1637	CG1637, isoform A [Drosophila melanogaster]	1	453	0.321	0.00287245	-1.63935	2.54175
NP_609089.1	CG10399	uncharacterized protein Dmel_CG10399, isoform A [Drosophila melanogaster]	6	323	0.442	0.00292091	-1.17788	2.53448
NP_730535.1	Psn	presenilin, isoform B [Drosophila melanogaster]	6	527	2.058	0.00307899	1.04124	2.51159
NP_524290.2	betaTub85D	beta-Tubulin at 85D [Drosophila melanogaster]	6	446	3.499	0.00314737	1.80694	2.50205
NP_610875.1	cbs	centrosomin's beautiful sister, isoform A [Drosophila melanogaster]	4	611	4.361	0.00314985	2.12466	2.50171
NP_651447.2	CG42235	uncharacterized protein Dmel_CG42235, isoform E [Drosophila melanogaster]	2	691	2.876	0.00317234	1.52406	2.49862
NP_523791.2	cora	coracle, isoform A [Drosophila melanogaster]	1	1698	3.202	0.0031863	1.67897	2.49671
NP_726038.1	Pu	punch, isoform A [Drosophila melanogaster]	10	324	2.553	0.00322524	1.35219	2.49144
NP_620115.2	dmGlut	dietary and metabolic glutamate transporter [Drosophila melanogaster]	9	496	0.393	0.00322907	-1.3474	2.49092
NP_609105.1	ico	iconoclast [Drosophila melanogaster]	18	745	0.452	0.00323197	-1.14561	2.49053
NP_524423.2	Calx	Na/Ca-exchange protein, isoform A [Drosophila melanogaster]	1	950	1.617	0.00325606	0.69332	2.48731
NP_650760.1	CG14291	uncharacterized protein Dmel_CG14291 [Drosophila melanogaster]	8	524	2.369	0.00337924	1.24428	2.47118
NP_523473.2	mRpS2	mitochondrial ribosomal protein S2 [Drosophila melanogaster]	5	264	0.587	0.0033829	-0.768568	2.47071
NP_001245581.1	Nrg	neuroglian, isoform G [Drosophila melanogaster]	57	1309	1.834	0.00345256	0.874994	2.46186
NP_648394.1	S-Lap3	Sperm-Leucylaminopeptidase 3, isoform C [Drosophila melanogaster]	8	535	4.079	0.00348623	2.02822	2.45764
NP_729394.1	S-Lap2	Sperm-Leucylaminopeptidase 2 [Drosophila melanogaster]	4	552	4.11	0.00365346	2.03914	2.4373
NP_001286937.1	Src64B	Src oncogene at 64B, isoform K [Drosophila melanogaster]	11	553	1.883	0.003784	0.913033	2.42205
NP_610635.4	Cyp12d1-p	Cyp12d1-p, isoform A [Drosophila melanogaster]	15	521	0.251	0.00380162	-1.99424	2.42003
NP_001097287.1	Dyb	dystrobrevin, isoform F [Drosophila melanogaster]	8	816	2.548	0.00394693	1.34937	2.40374
NP_725115.1	RpS11	ribosomal protein S11, isoform B [Drosophila melanogaster]	4	154	3.627	0.00396251	1.85878	2.40203
NP_651267.1	CG13623	uncharacterized protein Dmel_CG13623, isoform A [Drosophila melanogaster]	1	139	6.231	0.00401491	2.63946	2.39632
NP_650809.1	CG6255	CG6255 [Drosophila melanogaster]	3	342	17.523	0.00403881	4.13118	2.39375
NP_001188694.1	Msp300	Muscle-specific protein 300 kDa, isoform D [Drosophila melanogaster]	105	12345	2.125	0.00415739	1.08746	2.38118
NP_729966.1	CG7768	CG7768, isoform A [Drosophila melanogaster]	6	164	3.812	0.00418508	1.93055	2.3783
NP_569951.1	Pgam5	phosphoglycerate mutase 5, isoform A [Drosophila melanogaster]	10	289	0.65	0.00423229	-0.621488	2.37342
NP_729406.1	Prm	paramyosin, isoform C [Drosophila melanogaster]	1	640	2.08	0.00423815	1.05658	2.37282
NP_611134.1	loopin-1	loopin-1, isoform A [Drosophila melanogaster]	8	526	6.328	0.00426494	2.66175	2.37009
NP_722774.1	papi	papi, isoform B [Drosophila melanogaster]	18	576	1.528	0.00433028	0.611645	2.36348
NP_649086.2	CG6812	CG6812 [Drosophila melanogaster]	15	327	2.172	0.00433537	1.11902	2.36297
NP_477354.1	Hop	Hsp70/Hsp90 organizing protein [Drosophila melanogaster]	23	490	1.954	0.00438614	0.96643	2.35792
NP_001036571.2	CG9380	CG9380, isoform G [Drosophila melanogaster]	10	850	0.298	0.00443659	-1.74662	2.35295
NP_001163753.1	betaTub97EF	beta-Tubulin at 97EF, isoform B [Drosophila melanogaster]	7	457	1.914	0.00450197	0.936591	2.3466
NP_724294.1	CG31673	uncharacterized protein Dmel_CG31673, isoform A [Drosophila melanogaster]	3	326	0.637	0.00453045	-0.650635	2.34386
NP_651000.1	CG6439	CG6439, isoform A [Drosophila melanogaster]	19	370	2.308	0.00454609	1.20664	2.34236
NP_609595.1	Vha68-3	vacuolar H[+] ATPase 68kD subunit 3 [Drosophila melanogaster]	4	743	1.843	0.00476103	0.882056	2.3223
NP_729396.2	Zasp66	Z band alternatively spliced PDZ-motif protein 66, isoform F [Drosophila melanogaster]	4	402	3.501	0.00479729	1.80777	2.319
NP_001246494.1	Nurf-38	nucleosome remodeling factor - 38kD, isoform C [Drosophila melanogaster]	1	290	0.365	0.00490267	-1.45403	2.30957
NP_524956.2	Spn38F	serpin 38F, isoform A [Drosophila melanogaster]	8	372	3.705	0.00490669	1.88947	2.30921
NP_651408.1	Ssadh	succinic semialdehyde dehydrogenase, isoform A [Drosophila melanogaster]	18	509	0.591	0.00492124	-0.75877	2.30793
NP_732652.1	CG31343	uncharacterized protein Dmel_CG31343 [Drosophila melanogaster]	24	961	0.186	0.00493906	-2.42663	2.30636
NP_524925.1	Hsp60B	heat shock protein 60B [Drosophila melanogaster]	13	648	7.294	0.00495303	2.86671	2.30513
NP_724248.1	mRpS18B	mitochondrial ribosomal protein S18B, isoform B [Drosophila melanogaster]	5	204	0.597	0.00507866	-0.744197	2.29425
NP_524884.1	RpS14a	ribosomal protein S14a, isoform B [Drosophila melanogaster]	13	151	1.86	0.0052042	0.895303	2.28365
NP_650015.3	CG45076	uncharacterized protein Dmel_CG45076, isoform A [Drosophila melanogaster]	23	619	3.912	0.00528019	1.96791	2.27735
NP_648244.1	S-Lap1	Sperm-Leucylaminopeptidase 1 [Drosophila melanogaster]	4	555	5.138	0.00535248	2.36121	2.27145
NP_001260311.1	Dref	DNA replication-related element factor, isoform B [Drosophila melanogaster]	3	709	2.409	0.0055582	1.26843	2.25507
NP_724163.1	Ddc	dopa decarboxylase, isoform C [Drosophila melanogaster]	5	510	2.001	0.00557946	1.00072	2.25341
NP_788898.1	Ant2	adenine nucleotide translocase 2, isoform B [Drosophila melanogaster]	3	307	3.784	0.00561942	1.91991	2.25031
NP_001097706.1	CG17816	uncharacterized protein Dmel_CG17816, isoform G [Drosophila melanogaster]	4	882	3.882	0.0056262	1.9568	2.24978
NP_611983.2	Tina-1	troponin C-akin-1, isoform A [Drosophila melanogaster]	8	167	0.564	0.00563815	-0.826233	2.24886
NP_651314.1	CG11771	uncharacterized protein Dmel_CG11771 [Drosophila melanogaster]	30	730	0.481	0.00566268	-1.05589	2.24698
NP_001246674.1	rhea	rhea, isoform B [Drosophila melanogaster]	61	2836	1.936	0.00573166	0.953079	2.24172
NP_572639.2	CG1628	CG1628, isoform B [Drosophila melanogaster]	4	459	0.544	0.00582231	-0.878321	2.2349
NP_608858.3	Clect27	C-type lectin 27kD, isoform A [Drosophila melanogaster]	10	231	2.29	0.00587402	1.19535	2.23106
NP_001259867.1	NLaz	neural lazarillo, isoform B [Drosophila melanogaster]	7	245	0.255	0.00610078	-1.97143	2.21461
NP_001261287.1	alpha-Spec	alpha spectrin, isoform C [Drosophila melanogaster]	240	2447	1.915	0.00614609	0.937344	2.2114
NP_649675.2	CG1307	CG1307, isoform C [Drosophila melanogaster]	8	186	0.491	0.00618169	-1.02621	2.20889
NP_001260368.1	SCAR	SCAR, isoform D [Drosophila melanogaster]	9	674	1.719	0.00633102	0.78157	2.19853
NP_476687.1	Ptp61F	protein tyrosine phosphatase 61F, isoform A [Drosophila melanogaster]	11	548	1.521	0.00649931	0.60502	2.18713
NP_610309.1	CG2065	CG2065, isoform A [Drosophila melanogaster]	2	300	7.486	0.00659476	2.9042	2.1808
NP_001247372.1	tmod	tropomodulin, isoform N [Drosophila melanogaster]	17	567	1.956	0.00665055	0.967906	2.17714
NP_001246038.1	CG3793	CG3793, isoform B [Drosophila melanogaster]	2	341	2.286	0.00675237	1.19283	2.17054
NP_001137754.1	prom	prominin, isoform D [Drosophila melanogaster]	33	1235	2.347	0.00676011	1.23082	2.17005
NP_612023.1	ttm2	tiny tim 2 [Drosophila melanogaster]	1	409	3.191	0.00689623	1.67401	2.16139
NP_001246082.2	CG17323	uncharacterized protein Dmel_CG17323, isoform E [Drosophila melanogaster]	10	519	1.543	0.00690471	0.625738	2.16085
NP_001246623.1	mRpS6	mitochondrial ribosomal protein S6, isoform B [Drosophila melanogaster]	7	147	0.486	0.00692439	-1.04097	2.15962
NP_001259660.1	beta-Spec	beta spectrin, isoform B [Drosophila melanogaster]	6	2308	2.692	0.00694713	1.42868	2.15819
NP_524608.1	gammaCOP	coat protein (coatomer) gamma, isoform A [Drosophila melanogaster]	2	879	3.592	0.00700391	1.84479	2.15466
NP_610470.1	VhaAC45	vacuolar H[+] ATPase AC45 accessory subunit, isoform B [Drosophila melanogaster]	6	379	0.843	0.00709169	-0.246395	2.14925
NP_731600.1	Jupiter	jupiter, isoform B [Drosophila melanogaster]	4	185	4.057	0.007106	2.02041	2.14837
NP_648358.2	Zasp67	Z band alternatively spliced PDZ-motif protein 67, isoform G [Drosophila melanogaster]	9	730	3.813	0.00742296	1.93093	2.12942
NP_733332.1	Acph-1	acid phosphatase 1, isoform B [Drosophila melanogaster]	8	455	0.376	0.00749339	-1.4112	2.12532
NP_001097440.1	Unc-89	Unc-89, isoform C [Drosophila melanogaster]	63	4218	2.851	0.00756292	1.51147	2.12131
NP_725511.2	Strn-Mlck	Stretchin-Mlck, isoform R [Drosophila melanogaster]	66	1918	3.835	0.00758129	1.93923	2.12026
NP_573114.2	CG9914	CG9914, isoform A [Drosophila melanogaster]	16	315	1.556	0.00761644	0.637842	2.11825
NP_477401.2	Sbf	SET domain binding factor, isoform A [Drosophila melanogaster]	5	1993	2.898	0.00761987	1.53506	2.11805
NP_524000.1	Hsp27	heat shock protein 27, isoform A [Drosophila melanogaster]	16	213	3.07	0.00773759	1.61824	2.11139
NP_001287274.1	CG45076	uncharacterized protein Dmel_CG45076, isoform E [Drosophila melanogaster]	3	343	2.429	0.00787486	1.28036	2.10376
NP_648615.1	CG10748	uncharacterized protein Dmel_CG10748 [Drosophila melanogaster]	4	349	3	0.00789144	1.58496	2.10284
NP_651051.1	Pebp1	Phosphatidylethanolamine-binding protein 1 [Drosophila melanogaster]	9	176	0.083	0.00805826	-3.59074	2.09376
NP_524618.1	RpS3A	ribosomal protein S3A, isoform A [Drosophila melanogaster]	24	268	1.784	0.00811298	0.835116	2.09082
NP_001246015.1	Vha68-2	vacuolar H[+] ATPase 68 kDa subunit 2, isoform D [Drosophila melanogaster]	32	614	0.7	0.00814323	-0.514573	2.0892
NP_569845.2	CG17896	uncharacterized protein Dmel_CG17896, isoform B [Drosophila melanogaster]	26	520	0.674	0.00816186	-0.56918	2.08821
NP_788758.3	Doa	darkener of apricot, isoform R [Drosophila melanogaster]	2	1229	7.716	0.00824854	2.94785	2.08362
NP_476666.1	arm	armadillo, isoform A [Drosophila melanogaster]	12	843	2.05	0.00864445	1.03562	2.06326
NP_651052.1	CG5377	CG5377 [Drosophila melanogaster]	7	278	0.576	0.00864737	-0.795859	2.06312
NP_729053.2	CG10671	uncharacterized protein Dmel_CG10671, isoform B [Drosophila melanogaster]	6	480	1.784	0.00884701	0.835116	2.0532
NP_001259083.1	CaMKII	Calcium/calmodulin-dependent protein kinase II, isoform L [Drosophila melanogaster]	3	522	2.898	0.00891163	1.53506	2.05004
NP_651140.1	CG4434	CG4434 [Drosophila melanogaster]	9	535	3.021	0.00892003	1.59503	2.04963
NP_611097.2	CG44243	uncharacterized protein Dmel_CG44243, isoform B [Drosophila melanogaster]	8	396	1.578	0.00908996	0.658097	2.04144
NP_477464.1	Syt4	synaptotagmin 4 [Drosophila melanogaster]	4	474	2.495	0.00932906	1.31904	2.03016
NP_650774.1	NP15.6	NP15.6 [Drosophila melanogaster]	7	150	0.419	0.00945368	-1.25498	2.0244
NP_652032.1	Sply	Sphingosine-1-phosphate lyase, isoform A [Drosophila melanogaster]	31	545	0.565	0.0095103	-0.823677	2.02181
NP_723847.1	mRpS23	mitochondrial ribosomal protein S23 [Drosophila melanogaster]	8	189	0.642	0.00960427	-0.639355	2.01754
NP_730790.2	Gel	gelsolin, isoform D [Drosophila melanogaster]	19	798	1.745	0.00976413	0.803227	2.01037
NP_727519.1	dlg1	discs large 1, isoform F [Drosophila melanogaster]	17	816	3.249	0.00988631	1.7	2.00497
NP_725339.1	shot	short stop, isoform H [Drosophila melanogaster]	37	8805	2.532	0.00993135	1.34028	2.00299
NP_651391.1	tobi	target of brain insulin [Drosophila melanogaster]	23	657	6.926	0.00997701	2.79202	2.001
NP_732653.2	CG31233	uncharacterized protein Dmel_CG31233, isoform A [Drosophila melanogaster]	40	952	0.209	0.0101968	-2.25843	1.99154
NP_651002.3	CG6028	CG6028 [Drosophila melanogaster]	15	293	0.827	0.0102052	-0.274041	1.99118
NP_610040.1	CG17472	uncharacterized protein Dmel_CG17472 [Drosophila melanogaster]	3	159	3.688	0.0103179	1.88284	1.98641
NP_001259946.1	Drp1	dynamin related protein 1, isoform B [Drosophila melanogaster]	18	735	2.081	0.0104123	1.05728	1.98245
NP_727574.2	CG1847	CG1847, isoform C [Drosophila melanogaster]	1	342	3.009	0.0105996	1.58928	1.97471
NP_001188695.1	Msp300	Muscle-specific protein 300 kDa, isoform G [Drosophila melanogaster]	12	13540	3.035	0.0106173	1.6017	1.97399
NP_651416.1	CG5028	CG5028, isoform A [Drosophila melanogaster]	20	402	2.113	0.0106437	1.07929	1.97291
NP_001261364.1	ZnT63C	zinc transporter 63C, isoform F [Drosophila melanogaster]	2	545	3.028	0.0106799	1.59837	1.97143
NP_001262585.1	Mf	myofilin, isoform O [Drosophila melanogaster]	3	310	3.684	0.010785	1.88127	1.96718
NP_477307.1	CRMP	collapsin response mediator protein, isoform A [Drosophila melanogaster]	3	589	2.327	0.0108243	1.21847	1.9656
NP_001097389.1	RIC-3	RIC3 acetylcholine receptor chaperone, isoform E [Drosophila melanogaster]	1	481	4.26	0.0108642	2.09085	1.964
NP_611095.1	clu	clueless, isoform A [Drosophila melanogaster]	21	1448	2.525	0.0110264	1.33628	1.95757
NP_001260388.1	Vha100-5	vacuolar H[+] ATPase 100kD subunit 5, isoform B [Drosophila melanogaster]	22	814	0.277	0.0111207	-1.85204	1.95387
NP_001286038.1	Fas3	fasciclin 3, isoform G [Drosophila melanogaster]	3	557	2.569	0.0115569	1.36121	1.93716
NP_730954.2	CRMP	collapsin response mediator protein, isoform E [Drosophila melanogaster]	1	594	2.519	0.0115696	1.33285	1.93668
NP_001163784.1	gammaCOP	coat protein (coatomer) gamma, isoform C [Drosophila melanogaster]	2	878	2.855	0.0116362	1.51349	1.93419
NP_524361.4	Tm2	tropomyosin 2, isoform A [Drosophila melanogaster]	3	284	2.248	0.0117521	1.16864	1.92988
NP_647884.1	CG1311	CG1311, isoform A [Drosophila melanogaster]	6	691	1.549	0.0117527	0.631337	1.92986
NP_996248.1	Atpalpha	Na pump alpha subunit, isoform G [Drosophila melanogaster]	3	1002	1.488	0.0120835	0.573375	1.91781
NP_001246678.1	CG43078	uncharacterized protein Dmel_CG43078, isoform H [Drosophila melanogaster]	21	2540	2.746	0.0121561	1.45733	1.91521
NP_730917.1	CG31538	uncharacterized protein Dmel_CG31538 [Drosophila melanogaster]	8	563	12.283	0.0122255	3.61859	1.91273
NP_001163746.1	scrib	scribbled, isoform L [Drosophila melanogaster]	11	2585	3.494	0.0124468	1.80488	1.90494
NP_651985.1	CG14630	uncharacterized protein Dmel_CG14630 [Drosophila melanogaster]	6	406	0.524	0.0124516	-0.932361	1.90478
NP_001246632.1	axo	axotactin, isoform D [Drosophila melanogaster]	1	2070	2.361	0.0125649	1.2394	1.90084
NP_001260155.1	Liprin-alpha	Liprin-alpha, isoform E [Drosophila melanogaster]	17	1214	2.015	0.0126358	1.01078	1.8984
NP_524938.1	CIAPIN1	cytokine induced apoptosis inhibitor 1 [Drosophila melanogaster]	2	248	2.232	0.0126469	1.15834	1.89802
NP_001246890.1	nrm	neuromusculin, isoform E [Drosophila melanogaster]	17	2192	1.7	0.0128564	0.765535	1.89088
NP_001246141.1	CG17508	uncharacterized protein Dmel_CG17508, isoform B [Drosophila melanogaster]	1	194	3.338	0.0129877	1.73898	1.88647
NP_726788.1	CG4199	CG4199, isoform C [Drosophila melanogaster]	17	593	1.773	0.0132009	0.826193	1.8794
NP_649598.1	CG1208	CG1208, isoform B [Drosophila melanogaster]	3	496	2.527	0.0132584	1.33743	1.87751
NP_001036676.1	Cdep	Chondrocyte-derived ezrin-like domain containing protein, isoform E [Drosophila melanogaster]	6	1167	2.254	0.0133075	1.17249	1.8759
NP_476819.2	AP-2alpha	adaptor protein complex 2, alpha subunit, isoform A [Drosophila melanogaster]	33	940	1.762	0.0135812	0.817214	1.86706
NP_001246359.1	Asph	aspartyl beta-hydroxylase, isoform J [Drosophila melanogaster]	4	400	5.63	0.0138263	2.49313	1.85929
NP_610910.1	CG6543	CG6543, isoform A [Drosophila melanogaster]	15	295	0.382	0.0138705	-1.38836	1.85791
NP_650693.1	mTerf5	mitochondrial transcription termination factor 5 [Drosophila melanogaster]	6	560	0.72	0.013902	-0.473931	1.85692
NP_001246118.1	Dap160	dynamin associated protein 160, isoform D [Drosophila melanogaster]	23	1190	2.008	0.0145131	1.00576	1.83824
NP_650199.1	CG5844	CG5844 [Drosophila melanogaster]	12	378	0.558	0.0146982	-0.841663	1.83273
NP_524063.1	Hsc70-1	heat shock protein cognate 1, isoform A [Drosophila melanogaster]	17	641	2.124	0.0148077	1.08678	1.82951
NP_524060.2	Hml	hemolectin, isoform A [Drosophila melanogaster]	29	3843	2.41	0.014829	1.26903	1.82889
NP_001261007.1	Zasp52	Z band alternatively spliced PDZ-motif protein 52, isoform N [Drosophila melanogaster]	5	1267	5.382	0.0149313	2.42814	1.8259
NP_001284813.1	Vinc	vinculin, isoform B [Drosophila melanogaster]	48	961	1.638	0.0150181	0.711935	1.82339
NP_649069.2	CG3902	CG3902 [Drosophila melanogaster]	21	414	0.626	0.0150871	-0.675765	1.82139
NP_569983.1	CG3630	CG3630, isoform A [Drosophila melanogaster]	4	371	3.748	0.0152867	1.90612	1.81569
NP_611805.1	levy	levy, isoform A [Drosophila melanogaster]	7	109	0.46	0.0154645	-1.12029	1.81066
NP_995616.1	colt	congested-like trachea, isoform D [Drosophila melanogaster]	15	306	0.649	0.0154704	-0.62371	1.8105
NP_524388.1	Sgs5	salivary gland secretion 5 [Drosophila melanogaster]	1	163	6.498	0.0154855	2.7	1.81007
NP_523561.1	CAH1	carbonic anhydrase 1 [Drosophila melanogaster]	4	270	0.357	0.0155993	-1.486	1.80689
NP_001285787.1	CG13126	uncharacterized protein Dmel_CG13126, isoform B [Drosophila melanogaster]	8	463	0.511	0.0158499	-0.968605	1.79997
NP_001246786.1	Mbs	myosin binding subunit, isoform O [Drosophila melanogaster]	5	1273	2.193	0.0158776	1.13291	1.79922
NP_001286835.1	betaTub60D	beta-Tubulin at 60D, isoform B [Drosophila melanogaster]	1	453	3.228	0.016015	1.69064	1.79547
NP_649230.1	CG5955	CG5955 [Drosophila melanogaster]	2	367	1.75	0.017038	0.807355	1.76858
NP_611376.1	CG15096	uncharacterized protein Dmel_CG15096, isoform A [Drosophila melanogaster]	2	491	0.126	0.0172413	-2.9885	1.76343
NP_001247215.1	Calx	Na/Ca-exchange protein, isoform G [Drosophila melanogaster]	1	973	2.362	0.0173468	1.24001	1.76078
NP_724664.1	CG30376	uncharacterized protein Dmel_CG30376 [Drosophila melanogaster]	4	226	7.778	0.0173982	2.9594	1.7595
NP_524057.2	SP	Sex peptide [Drosophila melanogaster]	1	55	2.149	0.0174631	1.10367	1.75788
NP_650632.1	P5cr-2	Pyrroline-5-carboxylate reductase-like 2, isoform A [Drosophila melanogaster]	6	273	2.156	0.0174872	1.10836	1.75728
NP_001163769.1	Vha100-1	vacuolar H[+] ATPase 100kD subunit 1, isoform J [Drosophila melanogaster]	3	852	2.211	0.0175172	1.1447	1.75654
NP_732654.1	CG31198	uncharacterized protein Dmel_CG31198 [Drosophila melanogaster]	35	940	0.249	0.0179611	-2.00578	1.74567
NP_650696.1	Mdh2	malate dehydrogenase 2 [Drosophila melanogaster]	34	336	0.534	0.018182	-0.905088	1.74036
NP_649756.2	CG2698	CG2698, isoform A [Drosophila melanogaster]	2	817	3.147	0.0185831	1.65398	1.73088
NP_476821.1	tam	tamas [Drosophila melanogaster]	4	1145	0.479	0.0187157	-1.0619	1.72779
NP_001286796.1	SERCA	Sarco/endoplasmic reticulum Ca(2+)-ATPase, isoform I [Drosophila melanogaster]	2	999	1.978	0.0188093	0.984042	1.72563
NP_648112.2	Sh3beta	Sh3beta, isoform B [Drosophila melanogaster]	1	158	3.025	0.0188576	1.59694	1.72451
NP_728273.1	RpS10b	ribosomal protein S10b, isoform B [Drosophila melanogaster]	13	160	2.866	0.0189261	1.51904	1.72294
NP_001262658.1	cher	cheerio, isoform M [Drosophila melanogaster]	102	2429	1.805	0.019067	0.851999	1.71972
NP_724769.2	CG8026	CG8026, isoform D [Drosophila melanogaster]	6	322	0.493	0.0190843	-1.02034	1.71932
NP_477377.1	CG4882	CG4882, isoform A [Drosophila melanogaster]	21	406	0.579	0.0191985	-0.788365	1.71673
NP_611544.1	CG10527	uncharacterized protein Dmel_CG10527 [Drosophila melanogaster]	10	296	1.909	0.0193702	0.932817	1.71286
NP_611132.1	S-Lap8	Sperm-Leucylaminopeptidase 8 [Drosophila melanogaster]	5	534	3.201	0.0193949	1.67852	1.71231
NP_610220.1	CG15908	uncharacterized protein Dmel_CG15908 [Drosophila melanogaster]	9	156	0.415	0.0193952	-1.26882	1.71231
NP_649090.1	CG10424	uncharacterized protein Dmel_CG10424 [Drosophila melanogaster]	2	300	1.579	0.0196383	0.659011	1.7069
NP_609536.1	Tom70	translocase of outer membrane 70, isoform A [Drosophila melanogaster]	31	589	1.31	0.0199981	0.389567	1.69901
NP_611155.3	unc-104	uncoordinated-104, isoform D [Drosophila melanogaster]	14	1739	2.048	0.02005	1.03422	1.69789
NP_476617.1	LanA	laminin A [Drosophila melanogaster]	58	3712	1.653	0.0202613	0.725087	1.69333
NP_511153.1	mRpS25	mitochondrial ribosomal protein S25 [Drosophila melanogaster]	5	167	0.491	0.0203074	-1.02621	1.69235
NP_724008.1	Mhc	myosin heavy chain, isoform K [Drosophila melanogaster]	2	1936	1.846	0.0203945	0.884403	1.69049
NP_001027395.1	Spn43Ab	serpin 43Ab [Drosophila melanogaster]	25	393	1.71	0.0204869	0.773996	1.68852
NP_476772.1	alphaTub84B	alpha-Tubulin at 84B [Drosophila melanogaster]	8	450	2.758	0.0205207	1.46362	1.68781
NP_648843.1	CG5157	CG5157 [Drosophila melanogaster]	4	119	0.361	0.0205437	-1.46993	1.68732
NP_651713.1	Obp99b	Odorant-binding protein 99b, isoform A [Drosophila melanogaster]	5	149	4.679	0.0206576	2.2262	1.68492
NP_001262895.1	Miro	mitochondrial Rho, isoform F [Drosophila melanogaster]	5	673	2.082	0.0207407	1.05797	1.68318
NP_476590.1	Khc	kinesin heavy chain [Drosophila melanogaster]	51	975	1.773	0.0210652	0.826193	1.67644
NP_995940.2	CG33228	uncharacterized protein Dmel_CG33228, isoform B [Drosophila melanogaster]	4	215	0.702	0.0211414	-0.510457	1.67487
NP_001286795.1	kcc	kazachoc, isoform G [Drosophila melanogaster]	2	1077	1.499	0.0211699	0.584	1.67428
NP_001137683.2	Ehbp1	Eps15 homology domain containing protein-binding protein 1, isoform I [Drosophila melanogaster]	7	994	2.338	0.021196	1.22527	1.67375
NP_001246441.1	CG8654	CG8654, isoform B [Drosophila melanogaster]	5	502	1.622	0.0213628	0.697774	1.67034
NP_001259853.1	mtRNApol	mitochondrial RNA polymerase, isoform B [Drosophila melanogaster]	4	1369	0.513	0.021478	-0.962969	1.66801
NP_732006.2	Tm1	tropomyosin 1, isoform E [Drosophila melanogaster]	3	711	2.2	0.0214796	1.1375	1.66797
NP_610900.1	S-Lap7	Sperm-Leucylaminopeptidase 7, isoform A [Drosophila melanogaster]	7	527	4.972	0.0218991	2.31383	1.65957
NP_996356.1	CG3842	CG3842, isoform B [Drosophila melanogaster]	5	406	2.191	0.0219289	1.13159	1.65898
NP_001163221.1	RIC-3	RIC3 acetylcholine receptor chaperone, isoform H [Drosophila melanogaster]	2	456	4.346	0.0219311	2.11969	1.65894
NP_001162767.1	shi	shibire, isoform L [Drosophila melanogaster]	4	883	1.957	0.0219824	0.968644	1.65792
NP_001246228.1	brp	bruchpilot, isoform J [Drosophila melanogaster]	1	2238	2.692	0.0221506	1.42868	1.65461
NP_611142.3	CG5089	CG5089 [Drosophila melanogaster]	9	436	7.882	0.0224132	2.97856	1.6495
NP_001189305.1	CG9990	CG9990, isoform D [Drosophila melanogaster]	1	763	0.517	0.0225307	-0.951764	1.64723
NP_524356.1	Hsc70-4	heat shock protein cognate 4, isoform A [Drosophila melanogaster]	56	651	1.413	0.022755	0.498761	1.64292
NP_609805.1	CG17904	uncharacterized protein Dmel_CG17904 [Drosophila melanogaster]	2	311	1.345	0.0228024	0.427606	1.64202
NP_523528.1	yip2	yippee interacting protein 2 [Drosophila melanogaster]	29	398	0.698	0.0230658	-0.518701	1.63703
NP_001261935.1	CG13048	uncharacterized protein Dmel_CG13048, isoform B [Drosophila melanogaster]	1	206	3.73	0.0233211	1.89918	1.63225
NP_608978.2	Gal	beta galactosidase, isoform A [Drosophila melanogaster]	21	672	2.221	0.0233689	1.15121	1.63136
NP_722715.1	RFeSP	rieske iron-sulfur protein, isoform B [Drosophila melanogaster]	17	230	0.649	0.0233817	-0.62371	1.63112
NP_650070.1	ninaG	ninaG, isoform A [Drosophila melanogaster]	2	597	2.426	0.0235188	1.27858	1.62859
NP_523893.1	mRpS35	mitochondrial ribosomal protein S35 [Drosophila melanogaster]	10	326	0.577	0.0235945	-0.793357	1.62719
NP_996002.2	CG18769	uncharacterized protein Dmel_CG18769, isoform G [Drosophila melanogaster]	21	443	1.707	0.0236545	0.771463	1.62609
NP_726482.1	Eps-15	epidermal growth factor receptor pathway substrate clone 15, isoform B [Drosophila melanogaster]	1	1232	2.51	0.0240402	1.32769	1.61906
NP_001033870.1	capt	capulet, isoform B [Drosophila melanogaster]	21	783	1.854	0.0242003	0.890641	1.61618
NP_001260339.1	mRpS7	mitochondrial ribosomal protein S7, isoform B [Drosophila melanogaster]	12	218	0.621	0.0242261	-0.687335	1.61572
NP_729420.1	CG32026	uncharacterized protein Dmel_CG32026 [Drosophila melanogaster]	3	719	16.876	0.0247641	4.0769	1.60618
NP_726597.1	gw	gawky, isoform B [Drosophila melanogaster]	6	1384	3.411	0.0249601	1.77019	1.60275
NP_536787.1	cype	cyclope, isoform A [Drosophila melanogaster]	9	77	0.47	0.0250404	-1.08927	1.60136
NP_650063.1	CG17734	uncharacterized protein Dmel_CG17734, isoform A [Drosophila melanogaster]	3	101	0.438	0.0250606	-1.191	1.60101
NP_648103.1	CG8602	CG8602, isoform A [Drosophila melanogaster]	6	478	1.361	0.0251021	0.444667	1.60029
NP_477266.1	Vha44	vacuolar H[+] ATPase 44kD subunit, isoform A [Drosophila melanogaster]	40	388	0.649	0.0251387	-0.62371	1.59966
NP_609324.2	CG4592	CG4592, isoform A [Drosophila melanogaster]	1	287	0.467	0.0252475	-1.09851	1.59778
NP_572408.2	CG10920	uncharacterized protein Dmel_CG10920 [Drosophila melanogaster]	3	397	2.527	0.025441	1.33743	1.59447
NP_651210.3	CG6000	CG6000, isoform C [Drosophila melanogaster]	1	154	0.469	0.025445	-1.09234	1.5944
NP_608533.1	CG2794	CG2794 [Drosophila melanogaster]	11	700	0.642	0.0254927	-0.639355	1.59358
NP_996529.1	CG33502	uncharacterized protein Dmel_CG33502 [Drosophila melanogaster]	5	283	0.447	0.0255075	-1.16165	1.59333
NP_610295.1	CG2137	CG2137 [Drosophila melanogaster]	1	713	4.453	0.0257244	2.15478	1.58966
NP_728141.1	wupA	wings up A, isoform A [Drosophila melanogaster]	11	208	2.514	0.0257698	1.32998	1.58889
NP_525119.1	mRpS17	mitochondrial ribosomal protein S17 [Drosophila melanogaster]	8	155	0.666	0.0259566	-0.586406	1.58575
NP_609579.1	CG5525	CG5525 [Drosophila melanogaster]	20	533	1.754	0.0259743	0.810649	1.58546
NP_725047.2	CG30022	uncharacterized protein Dmel_CG30022 [Drosophila melanogaster]	11	279	0.738	0.0261204	-0.438307	1.58302
NP_728074.1	Fim	fimbrin, isoform D [Drosophila melanogaster]	17	641	0.481	0.0262781	-1.05589	1.58041
NP_726992.2	spoon	spoonbill, isoform C [Drosophila melanogaster]	10	607	2.21	0.0263276	1.14405	1.57959
NP_523377.1	r	rudimentary, isoform A [Drosophila melanogaster]	22	2224	1.98	0.0264468	0.9855	1.57763
NP_001097249.1	TER94	TER94, isoform C [Drosophila melanogaster]	2	826	4.465	0.0267474	2.15866	1.57272
NP_477258.1	Idgf1	imaginal disc growth factor 1 [Drosophila melanogaster]	10	439	1.431	0.0268441	0.517024	1.57115
NP_727905.1	sun	stunted, isoform B [Drosophila melanogaster]	2	57	0.587	0.0269669	-0.768568	1.56917
NP_523388.1	beta-Spec	beta spectrin, isoform A [Drosophila melanogaster]	3	2291	1.628	0.0273598	0.703101	1.56289
NP_511062.1	Spat	serine pyruvate aminotransferase [Drosophila melanogaster]	9	394	3.08	0.0279202	1.62293	1.55408
NP_524243.2	Rm62	Rm62, isoform A [Drosophila melanogaster]	28	719	0.597	0.0279784	-0.744197	1.55318
NP_511073.1	RpS6	ribosomal protein S6, isoform B [Drosophila melanogaster]	19	248	1.431	0.028005	0.517024	1.55276
NP_650248.1	CG7488	CG7488 [Drosophila melanogaster]	3	373	0.359	0.0281367	-1.47794	1.55073
NP_722838.1	Syt1	synaptotagmin 1, isoform B [Drosophila melanogaster]	1	472	2.705	0.0287637	1.43563	1.54116
NP_609590.1	Pih1D1	Pih1D1, isoform A [Drosophila melanogaster]	3	335	2.427	0.028779	1.27917	1.54092
NP_001286991.1	CG13315	uncharacterized protein Dmel_CG13315, isoform B [Drosophila melanogaster]	3	69	1.699	0.0295976	0.764686	1.52874
NP_648451.1	Plod	procollagen lysyl hydroxylase, isoform A [Drosophila melanogaster]	18	721	2.737	0.0302851	1.4526	1.51877
NP_523842.2	betaTub60D	beta-Tubulin at 60D, isoform A [Drosophila melanogaster]	1	454	2.17	0.0304998	1.1177	1.5157
NP_524776.1	ergic53	ergic53, isoform A [Drosophila melanogaster]	24	512	1.395	0.0305622	0.480265	1.51482
NP_730838.3	eIF3-S10	eIF3-S10, isoform D [Drosophila melanogaster]	50	1140	1.887	0.0306264	0.916094	1.5139
NP_649563.1	CG12171	uncharacterized protein Dmel_CG12171 [Drosophila melanogaster]	6	257	0.733	0.0306339	-0.448115	1.5138
NP_572884.1	CG1673	CG1673 [Drosophila melanogaster]	7	443	0.461	0.0306893	-1.11716	1.51301
NP_523396.1	scu	scully, isoform A [Drosophila melanogaster]	16	255	0.669	0.0307322	-0.579922	1.51241
NP_610333.1	CG8728	CG8728 [Drosophila melanogaster]	14	556	0.632	0.0310971	-0.662004	1.50728
NP_001259972.1	NTPase	NTPase, isoform F [Drosophila melanogaster]	24	524	1.23	0.0312427	0.298658	1.50525
NP_649521.1	CG12163	uncharacterized protein Dmel_CG12163, isoform B [Drosophila melanogaster]	28	475	0.752	0.0317856	-0.411195	1.49777
NP_726155.1	Synj	synaptojanin, isoform A [Drosophila melanogaster]	11	1218	1.337	0.0320256	0.418999	1.4945
NP_609027.3	CG9527	CG9527, isoform A [Drosophila melanogaster]	35	703	0.794	0.0321319	-0.332789	1.49306
NP_001163782.1	mesh	mesh, isoform D [Drosophila melanogaster]	35	1454	0.672	0.0322126	-0.573467	1.49197
NP_001285037.1	CG9034	CG9034, isoform B [Drosophila melanogaster]	3	77	0.517	0.0324104	-0.951764	1.48931
NP_732013.2	Tm2	tropomyosin 2, isoform C [Drosophila melanogaster]	2	284	2.599	0.0324288	1.37796	1.48907
NP_788023.1	CG33129	uncharacterized protein Dmel_CG33129, isoform E [Drosophila melanogaster]	17	677	0.674	0.0329696	-0.56918	1.48189
NP_722910.2	pgant4	polypeptide GalNAc transferase 4, isoform C [Drosophila melanogaster]	12	644	0.636	0.0330241	-0.652901	1.48117
NP_724495.2	Eb1	Eb1, isoform F [Drosophila melanogaster]	3	297	1.655	0.0330415	0.726831	1.48094
NP_477395.1	alphaCOP	coat protein (coatomer) alpha, isoform A [Drosophila melanogaster]	17	1234	1.682	0.0335522	0.750178	1.47428
NP_727109.2	CG4095	CG4095 [Drosophila melanogaster]	3	503	3.864	0.0335695	1.9501	1.47406
NP_647696.1	CG15820	uncharacterized protein Dmel_CG15820 [Drosophila melanogaster]	4	308	0.557	0.0341278	-0.844251	1.46689
NP_611243.1	P32	P32 [Drosophila melanogaster]	7	263	0.336	0.0342231	-1.57347	1.46568
NP_001163211.1	par-1	par-1, isoform T [Drosophila melanogaster]	2	1058	3.038	0.0342435	1.60312	1.46542
NP_001262361.1	CG2698	CG2698, isoform H [Drosophila melanogaster]	2	865	1.843	0.0343225	0.882056	1.46442
NP_727108.1	l(1)G0255	lethal (1) G0255, isoform B [Drosophila melanogaster]	26	467	0.643	0.0344679	-0.637109	1.46259
NP_651990.1	CG3719	CG3719 [Drosophila melanogaster]	1	160	0.461	0.0346076	-1.11716	1.46083
NP_651795.2	aralar1	aralar1, isoform A [Drosophila melanogaster]	2	682	0.445	0.0346423	-1.16812	1.46039
NP_722745.1	Got2	glutamate oxaloacetate transaminase 2, isoform B [Drosophila melanogaster]	25	431	0.523	0.0348192	-0.935117	1.45818
NP_649517.1	CG2604	CG2604, isoform A [Drosophila melanogaster]	20	430	0.688	0.035321	-0.53952	1.45197
NP_649692.2	Dpck	Dephospho-CoA kinase [Drosophila melanogaster]	6	236	1.674	0.0354332	0.7433	1.45059
NP_001162632.2	futsch	futsch, isoform E [Drosophila melanogaster]	107	5495	2.366	0.0356225	1.24245	1.44828
NP_723596.1	Myo31DF	myosin 31DF, isoform B [Drosophila melanogaster]	27	1011	0.55	0.0356295	-0.862496	1.44819
NP_725886.2	hts	hu li tai shao, isoform I [Drosophila melanogaster]	1	718	3.051	0.0358561	1.60928	1.44544
NP_733244.5	larp	La related protein, isoform D [Drosophila melanogaster]	35	1673	2.457	0.0358724	1.2969	1.44524
NP_524593.1	mRpS18C	mitochondrial ribosomal protein S18C [Drosophila melanogaster]	6	140	0.497	0.0360063	-1.00868	1.44362
NP_001163558.1	skap	skpA associated protein, isoform C [Drosophila melanogaster]	29	503	1.645	0.0361712	0.718088	1.44164
NP_996217.1	Tm1	tropomyosin 1, isoform K [Drosophila melanogaster]	3	518	2.79	0.0361945	1.48027	1.44136
NP_650843.1	CG4538	CG4538, isoform A [Drosophila melanogaster]	20	673	1.505	0.0374296	0.589763	1.42679
NP_724181.1	CG17544	uncharacterized protein Dmel_CG17544, isoform C [Drosophila melanogaster]	23	693	0.461	0.0377624	-1.11716	1.42294
NP_001263104.1	Fer1HCH	ferritin 1 heavy chain homologue, isoform I [Drosophila melanogaster]	12	245	0.563	0.0382704	-0.828793	1.41714
NP_611370.2	Cyp12b2	Cyp12b2 [Drosophila melanogaster]	9	535	0.729	0.0386895	-0.456009	1.41241
NP_001246677.1	CG43078	uncharacterized protein Dmel_CG43078, isoform G [Drosophila melanogaster]	9	2455	2.24	0.0387645	1.1635	1.41157
NP_609934.3	Ttc19	tetratricopeptide repeat domain 19 [Drosophila melanogaster]	4	369	0.247	0.0390029	-2.01742	1.4089
NP_525031.1	Cyp4g1	cytochrome P450-4g1 [Drosophila melanogaster]	33	556	0.564	0.0402151	-0.826233	1.39561
NP_572757.2	CG2025	CG2025 [Drosophila melanogaster]	6	1147	1.512	0.0404984	0.596458	1.39256
NP_723338.1	Bsg	basigin, isoform A [Drosophila melanogaster]	2	265	1.603	0.0406519	0.680774	1.39092
NP_729613.1	S-Lap4	Sperm-Leucylaminopeptidase 4 [Drosophila melanogaster]	12	524	2.758	0.0406987	1.46362	1.39042
NP_649263.2	Pka-R1	protein kinase, cAMP-dependent, regulatory subunit type 1, isoform O [Drosophila melanogaster]	1	463	1.747	0.0407665	0.80488	1.3897
NP_523651.4	cn	cinnabar [Drosophila melanogaster]	1	465	3.007	0.0410515	1.58832	1.38667
NP_731237.1	DppIII	dipeptidyl aminopeptidase III, isoform C [Drosophila melanogaster]	33	786	0.669	0.0414793	-0.579922	1.38217
NP_001259537.2	Clic	chloride intracellular channel, isoform C [Drosophila melanogaster]	5	260	0.759	0.0419648	-0.397828	1.37711
NP_726243.1	blw	bellwether [Drosophila melanogaster]	71	552	0.665	0.042026	-0.588574	1.37648
NP_001246206.1	RyR	ryanodine receptor, isoform J [Drosophila melanogaster]	2	5115	1.884	0.0422133	0.913799	1.37455
NP_524683.2	Shc	SHC-adaptor protein [Drosophila melanogaster]	3	409	2.02	0.0422405	1.01436	1.37427
NP_524400.2	P5cr	pyrroline 5-carboyxlate reductase [Drosophila melanogaster]	2	280	2.015	0.0426644	1.01078	1.36993
NP_001246224.1	Pdk	pyruvate dehydrogenase kinase, isoform C [Drosophila melanogaster]	1	413	1.955	0.0428332	0.967169	1.36822
NP_608544.1	Dbp21E2	DEAD box protein 21E2 [Drosophila melanogaster]	4	536	0.64	0.0428794	-0.643856	1.36775
NP_650886.1	CG4335	CG4335 [Drosophila melanogaster]	1	364	2.625	0.0429028	1.39232	1.36751
NP_724293.2	CG9331	CG9331, isoform A [Drosophila melanogaster]	25	364	0.741	0.0429592	-0.432455	1.36694
NP_610181.2	CG17337	uncharacterized protein Dmel_CG17337, isoform A [Drosophila melanogaster]	25	478	1.23	0.0430904	0.298658	1.36562
NP_524586.1	Mlc2	myosin light chain 2 [Drosophila melanogaster]	14	222	2.351	0.0434333	1.23327	1.36218
NP_729218.1	Dbi	Diazepam-binding inhibitor, isoform A [Drosophila melanogaster]	6	86	0.353	0.0435006	-1.50226	1.36151
NP_608372.1	CG9572	CG9572, isoform A [Drosophila melanogaster]	1	441	6.72	0.0436379	2.74846	1.36014
NP_995670.2	Apoltp	apolipoprotein lipid transfer particle [Drosophila melanogaster]	60	4333	0.751	0.0440867	-0.413115	1.35569
NP_651668.1	CG11876	uncharacterized protein Dmel_CG11876, isoform D [Drosophila melanogaster]	13	365	0.655	0.0442566	-0.610433	1.35402
NP_524675.1	Pgm	phosphoglucose mutase [Drosophila melanogaster]	19	560	1.259	0.044443	0.332278	1.3522
NP_650991.1	CG6656	CG6656 [Drosophila melanogaster]	7	395	1.431	0.0444831	0.517024	1.35181
NP_648759.1	CG6888	CG6888 [Drosophila melanogaster]	6	196	2.311	0.044562	1.20852	1.35104
NP_610292.2	CG2144	CG2144 [Drosophila melanogaster]	2	927	1.545	0.0446327	0.627607	1.35035
NP_001262024.1	CG3961	CG3961, isoform E [Drosophila melanogaster]	22	666	1.355	0.0457738	0.438293	1.33938
NP_001097185.2	RtGEF	Rho-type guanine nucleotide exchange factor, isoform D [Drosophila melanogaster]	2	973	3.456	0.045825	1.7891	1.3389
NP_609999.2	CG10628	uncharacterized protein Dmel_CG10628 [Drosophila melanogaster]	4	383	0.516	0.0460825	-0.954557	1.33646
NP_730611.1	AcCoAS	acetyl coenzyme A synthase, isoform A [Drosophila melanogaster]	16	670	1.382	0.0467203	0.466758	1.33049
NP_001246757.1	Mpcp	mitochondrial phosphate carrier protein, isoform C [Drosophila melanogaster]	18	356	0.519	0.0473768	-0.946194	1.32443
NP_610342.1	ACC	Acetyl-CoA carboxylase, isoform A [Drosophila melanogaster]	51	2482	1.67	0.0477792	0.739848	1.32076
NP_001246229.1	brp	bruchpilot, isoform K [Drosophila melanogaster]	1	1707	2.294	0.0479006	1.19787	1.31966
NP_524674.1	Hex-C	hexokinase C [Drosophila melanogaster]	9	454	0.571	0.0479163	-0.808437	1.31952
NP_001260956.1	Vmat	vesicular monoamine transporter, isoform F [Drosophila melanogaster]	1	610	2.685	0.0484323	1.42492	1.31486
NP_610889.1	CG42807	uncharacterized protein Dmel_CG42807, isoform A [Drosophila melanogaster]	5	278	2.599	0.0484434	1.37796	1.31477
NP_650423.1	Mf	myofilin, isoform B [Drosophila melanogaster]	2	365	2.25	0.0485859	1.16993	1.31349
NP_610854.1	CG4679	CG4679 [Drosophila melanogaster]	18	652	0.61	0.0488496	-0.713119	1.31114
NP_723087.1	CG31915	uncharacterized protein Dmel_CG31915 [Drosophila melanogaster]	4	612	1.76	0.0494261	0.815575	1.30604
NP_648239.1	CG6638	CG6638 [Drosophila melanogaster]	12	420	0.677	0.0500456	-0.562772	1.30063
NP_001245533.1	Mlc-c	myosin light chain cytoplasmic, isoform B [Drosophila melanogaster]	6	153	0.478	0.0503782	-1.06492	1.29776
NP_001189276.1	Syx1A	syntaxin 1A, isoform B [Drosophila melanogaster]	20	296	1.563	0.050435	0.644318	1.29727
NP_572182.1	CG7024	CG7024 [Drosophila melanogaster]	3	479	4.39	0.0506947	2.13422	1.29504
NP_724679.2	Mal-A6	maltase A6, isoform D [Drosophila melanogaster]	18	601	5.009	0.0509	2.32452	1.29328
NP_477122.1	Mlp84B	muscle LIM protein at 84B, isoform A [Drosophila melanogaster]	7	495	1.914	0.0514457	0.936591	1.28865
NP_648622.1	CG11267	uncharacterized protein Dmel_CG11267 [Drosophila melanogaster]	9	103	0.243	0.0514904	-2.04097	1.28827
NP_001261430.1	Dhc64C	dynein heavy chain 64C, isoform G [Drosophila melanogaster]	1	4648	1.998	0.0522054	0.998557	1.28228
NP_723346.2	Bsg	basigin, isoform G [Drosophila melanogaster]	9	648	1.394	0.0530887	0.479231	1.275
NP_001262783.1	Syp	syncrip, isoform Q [Drosophila melanogaster]	1	761	2.16	0.0534828	1.11103	1.27179
NP_524006.1	LanB2	laminin B2, isoform A [Drosophila melanogaster]	56	1639	1.832	0.0536984	0.87342	1.27004
NP_001246877.1	CG7470	CG7470, isoform B [Drosophila melanogaster]	45	776	1.568	0.0538822	0.648926	1.26855
NP_524415.1	TFAM	mitochondrial transcription factor A, isoform A [Drosophila melanogaster]	30	257	0.675	0.054196	-0.567041	1.26603
NP_728275.1	CG14207	uncharacterized protein Dmel_CG14207, isoform B [Drosophila melanogaster]	4	192	1.563	0.0542709	0.644318	1.26543
NP_996249.1	Atpalpha	Na pump alpha subunit, isoform F [Drosophila melanogaster]	1	1002	1.543	0.0546271	0.625738	1.26259
NP_001189035.1	CG16986	uncharacterized protein Dmel_CG16986, isoform B [Drosophila melanogaster]	2	143	0.529	0.0548155	-0.91866	1.2611
NP_001245732.1	wupA	wings up A, isoform H [Drosophila melanogaster]	12	260	2.744	0.0550065	1.45628	1.25959
NP_611541.1	mRpL54	mitochondrial ribosomal protein L54 [Drosophila melanogaster]	1	132	1.199	0.0550208	0.261832	1.25947
NP_650318.1	Dip-B	dipeptidase B, isoform A [Drosophila melanogaster]	23	508	0.802	0.0550657	-0.318326	1.25912
NP_572967.2	CG5321	CG5321, isoform B [Drosophila melanogaster]	6	413	0.734	0.0557535	-0.446148	1.25373
NP_649459.4	CG1090	CG1090, isoform G [Drosophila melanogaster]	4	633	2.772	0.0562619	1.47093	1.24979
NP_610299.2	Vps13	vacuolar protein sorting 13, isoform A [Drosophila melanogaster]	62	3321	1.481	0.0567129	0.566572	1.24632
NP_572237.1	CG42492	uncharacterized protein Dmel_CG42492, isoform A [Drosophila melanogaster]	6	916	1.783	0.0571072	0.834307	1.24331
NP_524134.1	mRpS26	mitochondrial ribosomal protein S26 [Drosophila melanogaster]	8	225	0.575	0.057639	-0.798366	1.23928
NP_610693.1	Tret1-1	trehalose transporter 1-1, isoform A [Drosophila melanogaster]	15	857	2.032	0.0579122	1.0229	1.23723
NP_724824.1	CG1648	CG1648, isoform B [Drosophila melanogaster]	41	232	2.257	0.0579811	1.17441	1.23671
NP_001137633.1	Syb	synaptobrevin, isoform C [Drosophila melanogaster]	12	152	1.664	0.0580512	0.734655	1.23619
NP_648957.1	CG7724	CG7724 [Drosophila melanogaster]	2	398	1.844	0.0581809	0.882839	1.23522
NP_724106.1	Fas3	fasciclin 3, isoform B [Drosophila melanogaster]	2	401	2.233	0.05857	1.15898	1.23233
NP_001246418.1	CG11961	uncharacterized protein Dmel_CG11961, isoform C [Drosophila melanogaster]	2	891	0.474	0.0586495	-1.07704	1.23174
NP_001260163.1	nrv1	nervana 1, isoform B [Drosophila melanogaster]	17	309	0.838	0.0592215	-0.254978	1.22752
NP_523366.2	Cyp1	cyclophilin 1 [Drosophila melanogaster]	12	227	0.741	0.0593442	-0.432455	1.22662
NP_647730.1	CG16985	uncharacterized protein Dmel_CG16985 [Drosophila melanogaster]	3	149	0.674	0.0602069	-0.56918	1.22035
NP_001261020.1	Asph	aspartyl beta-hydroxylase, isoform L [Drosophila melanogaster]	8	991	1.647	0.060307	0.719841	1.21963
NP_523460.2	Syt1	synaptotagmin 1, isoform A [Drosophila melanogaster]	3	474	3.019	0.0603163	1.59407	1.21957
NP_523785.2	mRpS28	mitochondrial ribosomal protein S28 [Drosophila melanogaster]	3	194	0.472	0.0606886	-1.08314	1.21689
NP_649139.1	Oat	ornithine aminotransferase precursor [Drosophila melanogaster]	15	431	0.633	0.0607822	-0.659723	1.21622
NP_477101.1	SdhB	succinate dehydrogenase, subunit B (iron-sulfur) [Drosophila melanogaster]	23	297	0.493	0.0615473	-1.02034	1.21079
NP_523503.2	ninaC	neither inactivation nor afterpotential C, isoform B [Drosophila melanogaster]	19	1501	2.185	0.0616172	1.12763	1.2103
NP_001036428.1	CG17683	uncharacterized protein Dmel_CG17683, isoform A [Drosophila melanogaster]	2	477	0.18	0.0621396	-2.47393	1.20663
NP_726633.2	CaMKII	Calcium/calmodulin-dependent protein kinase II, isoform A [Drosophila melanogaster]	2	490	2.474	0.0627249	1.30685	1.20256
NP_001245927.1	milt	milton, isoform D [Drosophila melanogaster]	2	1256	2.922	0.0627946	1.54696	1.20208
NP_650047.3	SdhC	succinate dehydrogenase, subunit C, isoform A [Drosophila melanogaster]	7	171	0.481	0.0629034	-1.05589	1.20133
NP_523602.2	Top3alpha	topoisomerase 3alpha [Drosophila melanogaster]	3	1250	0.69	0.0631412	-0.535332	1.19969
NP_001261719.1	CG18815	uncharacterized protein Dmel_CG18815, isoform E [Drosophila melanogaster]	4	232	0.566	0.0641606	-0.821126	1.19273
NP_001286309.1	metro	menage a trois, isoform D [Drosophila melanogaster]	2	546	1.74	0.065258	0.799087	1.18537
NP_610107.1	CG8665	CG8665 [Drosophila melanogaster]	6	913	1.65	0.0653567	0.722466	1.18471
NP_001303317.1	CG5885	CG5885, isoform B [Drosophila melanogaster]	4	190	0.402	0.0653575	-1.31473	1.1847
NP_001162825.1	bt	bent, isoform F [Drosophila melanogaster]	163	8933	1.406	0.0660973	0.491597	1.17982
NP_524877.1	comt	comatose, isoform A [Drosophila melanogaster]	28	745	1.633	0.0661067	0.707525	1.17975
NP_476714.1	sgg	shaggy, isoform A [Drosophila melanogaster]	1	575	2.032	0.0665042	1.0229	1.17715
NP_001188664.1	Ucp4A	Ucp4A, isoform B [Drosophila melanogaster]	5	340	0.631	0.0667141	-0.664288	1.17578
NP_726062.2	CG9485	CG9485, isoform B [Drosophila melanogaster]	22	1629	1.573	0.0668619	0.653519	1.17482
NP_722780.1	Tengl1	testis EndoG-Like 1 [Drosophila melanogaster]	3	319	3.139	0.0671706	1.65031	1.17282
NP_524297.1	alphaTub85E	alpha-Tubulin at 85E [Drosophila melanogaster]	2	449	5.166	0.0672617	2.36905	1.17223
NP_610174.1	CG11665	uncharacterized protein Dmel_CG11665, isoform A [Drosophila melanogaster]	15	658	1.476	0.0673118	0.561693	1.17191
NP_573000.1	CG5599	CG5599 [Drosophila melanogaster]	13	462	0.538	0.0673121	-0.894322	1.17191
NP_001284997.1	mys	myospheroid, isoform B [Drosophila melanogaster]	8	846	1.537	0.0675481	0.620117	1.17039
NP_523419.1	Rab10	Rab10 [Drosophila melanogaster]	7	204	1.23	0.0675906	0.298658	1.17011
NP_524448.3	PyK	pyruvate kinase, isoform A [Drosophila melanogaster]	34	533	1.675	0.0677805	0.744161	1.1689
NP_651330.1	veli	veli, isoform A [Drosophila melanogaster]	13	195	1.745	0.0687786	0.803227	1.16255
NP_523811.1	mRpS29	mitochondrial ribosomal protein S29 [Drosophila melanogaster]	11	392	0.464	0.0695198	-1.1078	1.15789
NP_612019.2	DIP2	DISCO interacting protein 2, isoform A [Drosophila melanogaster]	4	1773	1.823	0.0701181	0.866315	1.15417
NP_511096.2	Ost48	oligosaccharyltransferase 48kD subunit [Drosophila melanogaster]	16	449	1.192	0.0711866	0.253384	1.1476
NP_650783.2	Cyp12a4	Cyp12a4 [Drosophila melanogaster]	14	536	0.545	0.0714938	-0.875672	1.14573
NP_651281.1	CG13630	uncharacterized protein Dmel_CG13630 [Drosophila melanogaster]	8	374	1.686	0.0722368	0.753605	1.14124
NP_001259254.1	CG42492	uncharacterized protein Dmel_CG42492, isoform D [Drosophila melanogaster]	6	977	2.742	0.0722626	1.45523	1.14109
NP_477392.1	scf	supercoiling factor, isoform A [Drosophila melanogaster]	18	329	3.708	0.073098	1.89064	1.13609
NP_001285012.1	sni	sniffer, isoform B [Drosophila melanogaster]	8	247	0.461	0.0731433	-1.11716	1.13583
NP_649905.1	CG8199	CG8199 [Drosophila melanogaster]	10	439	0.614	0.0732102	-0.703689	1.13543
NP_730695.1	P5CDh1	delta-1-Pyrroline-5-carboxylate dehydrogenase 1, isoform A [Drosophila melanogaster]	49	574	0.695	0.0745094	-0.524915	1.12779
NP_647661.1	mRpL46	mitochondrial ribosomal protein L46 [Drosophila melanogaster]	13	258	0.433	0.0752794	-1.20756	1.12332
NP_001260919.1	Amph	amphiphysin, isoform B [Drosophila melanogaster]	2	502	1.775	0.0754599	0.827819	1.12228
NP_001036474.2	l(2)01289	lethal (2) 01289, isoform H [Drosophila melanogaster]	1	840	1.425	0.076051	0.510962	1.1189
NP_523837.2	gek	genghis khan [Drosophila melanogaster]	4	1637	1.714	0.0769996	0.777367	1.11351
NP_001027420.2	Zasp52	Z band alternatively spliced PDZ-motif protein 52, isoform F [Drosophila melanogaster]	6	2194	1.754	0.0779008	0.810649	1.10846
NP_001285923.1	bgm	bubblegum, isoform C [Drosophila melanogaster]	22	666	0.511	0.0785536	-0.968605	1.10483
NP_476908.1	Vha55	vacuolar H[+]-ATPase 55kD subunit, isoform B [Drosophila melanogaster]	39	490	0.795	0.0791753	-0.330973	1.10141
NP_726489.2	CG44247	uncharacterized protein Dmel_CG44247, isoform A [Drosophila melanogaster]	7	536	1.81	0.0793158	0.85599	1.10064
NP_728408.3	CG1801	CG1801 [Drosophila melanogaster]	1	1655	2.231	0.0798536	1.15769	1.09771
NP_477159.1	Hmu	hemomucin [Drosophila melanogaster]	19	579	1.303	0.0799142	0.381837	1.09738
NP_001246630.1	axo	axotactin, isoform B [Drosophila melanogaster]	2	2148	2.432	0.0804315	1.28214	1.09457
NP_651399.2	CG5116	CG5116, isoform A [Drosophila melanogaster]	2	526	0.591	0.0804484	-0.75877	1.09448
NP_599137.1	Rab11	Rab11, isoform A [Drosophila melanogaster]	9	214	0.477	0.0822891	-1.06794	1.08466
NP_001261023.1	Atg9	Autophagy-related 9, isoform B [Drosophila melanogaster]	12	852	1.33	0.0824565	0.411426	1.08378
NP_650189.1	Cyp9f2	Cyp9f2 [Drosophila melanogaster]	22	516	0.685	0.0826681	-0.545824	1.08266
NP_733266.1	CG11876	uncharacterized protein Dmel_CG11876, isoform B [Drosophila melanogaster]	3	273	0.547	0.0827754	-0.870387	1.0821
NP_611691.1	bonsai	bonsai [Drosophila melanogaster]	8	280	0.688	0.0839422	-0.53952	1.07602
NP_649765.1	CG7910	CG7910, isoform A [Drosophila melanogaster]	21	530	0.549	0.0843181	-0.865122	1.07408
NP_524270.2	mRpS9	mitochondrial ribosomal protein S9 [Drosophila melanogaster]	11	395	0.596	0.0851645	-0.746616	1.06974
NP_649128.1	CG9231	CG9231, isoform A [Drosophila melanogaster]	9	125	0.619	0.0855428	-0.691989	1.06782
NP_650503.1	Hmt-1	heavy metal tolerance factor 1 [Drosophila melanogaster]	18	866	0.776	0.0857763	-0.365871	1.06663
NP_608929.1	CG7382	CG7382 [Drosophila melanogaster]	12	236	1.114	0.0864436	0.155749	1.06327
NP_001014738.2	up	upheld, isoform K [Drosophila melanogaster]	7	396	1.879	0.0865439	0.909965	1.06276
NP_608884.1	Scox	synthesis of cytochrome c oxidase [Drosophila melanogaster]	12	251	0.611	0.0868945	-0.710756	1.06101
NP_572810.1	CG1824	CG1824 [Drosophila melanogaster]	12	761	0.808	0.0870365	-0.307573	1.0603
NP_726636.2	CaMKII	Calcium/calmodulin-dependent protein kinase II, isoform E [Drosophila melanogaster]	4	509	2.175	0.087393	1.12102	1.05852
NP_001245567.1	Pdp	pyruvate dehydrogenase phosphatase, isoform B [Drosophila melanogaster]	6	475	0.659	0.0891241	-0.60165	1.05
NP_611501.1	CG11110	uncharacterized protein Dmel_CG11110 [Drosophila melanogaster]	4	171	0.543	0.0892188	-0.880976	1.04954
NP_573313.2	Rip11	Rab11 interacting protein, isoform A [Drosophila melanogaster]	4	832	2.024	0.0893712	1.01721	1.0488
NP_001259133.1	CG11448	uncharacterized protein Dmel_CG11448, isoform C [Drosophila melanogaster]	3	486	1.555	0.0897127	0.636915	1.04715
NP_524682.1	sun	stunted, isoform A [Drosophila melanogaster]	2	61	0.353	0.0899231	-1.50226	1.04613
NP_648100.2	CG8607	CG8607 [Drosophila melanogaster]	7	275	0.326	0.0899688	-1.61706	1.04591
NP_649674.1	CG1315	CG1315, isoform A [Drosophila melanogaster]	2	419	0.363	0.091284	-1.46196	1.03961
NP_608354.1	Pmp70	peroxisomal membrane protein 70 kDa, isoform A [Drosophila melanogaster]	21	665	0.445	0.0915256	-1.16812	1.03846
NP_001285311.1	mmd	mind-meld, isoform J [Drosophila melanogaster]	1	1484	2.074	0.0918665	1.05242	1.03684
NP_001247319.1	scrib	scribbled, isoform N [Drosophila melanogaster]	5	2554	2.352	0.0918859	1.23389	1.03675
NP_728869.1	PHGPx	PHGPx, isoform D [Drosophila melanogaster]	15	238	1.426	0.0930746	0.511974	1.03117
NP_727992.1	RpS19a	ribosomal protein S19a, isoform B [Drosophila melanogaster]	17	156	1.621	0.093612	0.696884	1.02867
NP_001097705.1	CG17816	uncharacterized protein Dmel_CG17816, isoform E [Drosophila melanogaster]	2	855	2.821	0.0939082	1.49621	1.0273
NP_609322.1	CG4598	CG4598, isoform A [Drosophila melanogaster]	13	281	0.532	0.0968359	-0.910502	1.01396
NP_611563.1	CG4302	CG4302 [Drosophila melanogaster]	20	532	0.561	0.096846	-0.833927	1.01392
NP_610384.1	Mal-A8	maltase A8 [Drosophila melanogaster]	14	588	2.207	0.0986052	1.14209	1.0061
NP_476879.1	tok	tolkin, isoform A [Drosophila melanogaster]	4	1464	1.642	0.0990968	0.715454	1.00394
NP_001163112.1	whd	withered, isoform D [Drosophila melanogaster]	19	782	1.285	0.0993794	0.361768	1.0027
NP_001097740.1	CG14688	uncharacterized protein Dmel_CG14688 [Drosophila melanogaster]	1	288	5.842	0.100068	2.54646	0.999703
NP_524385.2	CREG	cellular repressor of E1A-stimulated genes, isoform A [Drosophila melanogaster]	12	211	1.525	0.10086	0.608809	0.996283
NP_725252.1	TppII	tripeptidyl-peptidase II, isoform D [Drosophila melanogaster]	37	1441	1.371	0.101295	0.455229	0.994413
NP_476627.3	Mal-A1	maltase A1 [Drosophila melanogaster]	26	577	3.088	0.10151	1.62667	0.993491
NP_724110.1	RpS26	ribosomal protein S26, isoform C [Drosophila melanogaster]	4	114	1.405	0.102438	0.49057	0.989538
NP_651251.3	CG18528	uncharacterized protein Dmel_CG18528 [Drosophila melanogaster]	5	493	1.731	0.102493	0.791606	0.989307
NP_524382.1	mRpS11	mitochondrial ribosomal protein S11 [Drosophila melanogaster]	5	200	0.71	0.103235	-0.494109	0.986174
NP_996062.3	Ccdc56	Coiled-coil domain containing 56 [Drosophila melanogaster]	4	87	0.632	0.10347	-0.662004	0.985185
NP_001285018.1	CG1440	CG1440, isoform D [Drosophila melanogaster]	14	551	0.84	0.103516	-0.251539	0.98499
NP_001261404.1	Rop	Ras opposite, isoform B [Drosophila melanogaster]	27	597	1.214	0.103965	0.279768	0.983111
NP_650279.1	Dic1	dicarboxylate carrier 1, isoform A [Drosophila melanogaster]	9	280	0.736	0.104411	-0.442222	0.981253
NP_001245813.1	galectin	galectin, isoform D [Drosophila melanogaster]	2	401	2.251	0.10448	1.17057	0.980965
NP_651875.1	CG1774	CG1774, isoform A [Drosophila melanogaster]	2	472	4.101	0.104944	2.03598	0.979042
NP_609845.1	CG5131	CG5131 [Drosophila melanogaster]	16	283	1.894	0.105151	0.921436	0.978188
NP_727371.1	CG9691	CG9691, isoform B [Drosophila melanogaster]	10	121	2.645	0.105262	1.40327	0.977729
NP_001259536.2	CtsB1	cathepsin B1, isoform C [Drosophila melanogaster]	11	340	0.613	0.105369	-0.706041	0.977286
NP_733371.1	PH4alphaEFB	prolyl-4-hydroxylase-alpha EFB [Drosophila melanogaster]	16	550	2.013	0.105486	1.00935	0.976803
NP_648884.1	Cpr72Ec	cuticular protein 72Ec [Drosophila melanogaster]	26	429	1.84	0.106259	0.879706	0.973636
NP_001162742.1	up	upheld, isoform I [Drosophila melanogaster]	4	397	1.931	0.10649	0.949348	0.972692
NP_610383.1	Mal-A7	maltase A7, isoform A [Drosophila melanogaster]	17	599	3.058	0.106814	1.61259	0.971372
NP_725530.1	spin	spinster, isoform C [Drosophila melanogaster]	2	605	0.384	0.10819	-1.38082	0.965814
NP_523827.1	l(2)efl	lethal (2) essential for life, isoform A [Drosophila melanogaster]	11	187	2.063	0.108482	1.04474	0.964643
NP_523968.1	Arp3	Actin-related protein 3, isoform A [Drosophila melanogaster]	9	418	1.193	0.108933	0.254594	0.962842
NP_001287568.1	tau	tau, isoform M [Drosophila melanogaster]	2	367	2.478	0.110428	1.30918	0.956922
NP_523463.2	Prx6005	peroxiredoxin 6005 [Drosophila melanogaster]	8	222	1.305	0.11065	0.38405	0.956049
NP_608924.1	CG12512	uncharacterized protein Dmel_CG12512 [Drosophila melanogaster]	17	593	0.62	0.110887	-0.68966	0.955119
NP_523860.2	zip	zipper, isoform A [Drosophila melanogaster]	4	2056	2.253	0.110937	1.17185	0.954922
NP_610575.1	Ndg	Nidogen/entactin, isoform A [Drosophila melanogaster]	5	1350	1.403	0.111066	0.488515	0.954419
NP_524614.2	mod	modulo, isoform A [Drosophila melanogaster]	21	542	0.678	0.11237	-0.560643	0.949349
NP_001285261.1	Lsd-2	lipid storage droplet-2, isoform E [Drosophila melanogaster]	1	335	1.724	0.112734	0.78576	0.947945
NP_649466.1	lost	lost [Drosophila melanogaster]	39	545	1.509	0.112862	0.593593	0.947453
NP_729792.1	Adk1	adenylate kinase 1, isoform B [Drosophila melanogaster]	9	229	1.327	0.113158	0.408168	0.946313
NP_524647.2	sif	still life, isoform A [Drosophila melanogaster]	13	2052	2.37	0.11357	1.24489	0.944736
NP_729738.1	Bmcp	bmcp, isoform A [Drosophila melanogaster]	5	303	0.586	0.113599	-0.771027	0.944626
NP_787987.1	Rtnl1	Reticulon-like1, isoform A [Drosophila melanogaster]	1	222	0.455	0.113703	-1.13606	0.944227
NP_608637.1	Npc2a	Niemann-Pick type C-2a [Drosophila melanogaster]	1	148	0.525	0.113777	-0.929611	0.943945
NP_608445.2	CG1718	CG1718, isoform B [Drosophila melanogaster]	13	1714	0.595	0.114136	-0.749038	0.942579
NP_651963.1	Sucb	sucb, isoform A [Drosophila melanogaster]	20	416	1.853	0.115151	0.889863	0.938732
NP_001097742.1	CG6567	CG6567 [Drosophila melanogaster]	13	235	0.558	0.115152	-0.841663	0.938729
NP_001163538.1	lap	like-AP180, isoform D [Drosophila melanogaster]	4	788	2.483	0.115493	1.31208	0.937445
NP_001163012.2	l(2)37Cc	lethal (2) 37Cc, isoform D [Drosophila melanogaster]	27	276	0.649	0.1176	-0.62371	0.929593
NP_524705.1	slmo	slowmo, isoform B [Drosophila melanogaster]	2	215	1.486	0.11766	0.571434	0.929371
NP_511119.2	hop	hopscotch [Drosophila melanogaster]	4	1177	1.289	0.118599	0.366252	0.925919
NP_652604.2	c12.2	c12.2, isoform A [Drosophila melanogaster]	22	1386	0.727	0.119746	-0.459973	0.921739
NP_649578.1	CG2100	CG2100, isoform A [Drosophila melanogaster]	2	477	0.855	0.121475	-0.226004	0.915512
NP_001284854.1	Fas2	fasciclin 2, isoform G [Drosophila melanogaster]	33	885	1.242	0.122404	0.312665	0.912203
NP_651511.1	CG5500	CG5500 [Drosophila melanogaster]	1	167	0.599	0.122686	-0.739372	0.911206
NP_001027109.2	Pmi	Pmi, isoform D [Drosophila melanogaster]	6	182	0.535	0.123801	-0.902389	0.907276
NP_476566.1	Gpdh	glycerol 3 phosphate dehydrogenase, isoform C [Drosophila melanogaster]	27	353	0.724	0.124118	-0.465938	0.906164
NP_611548.1	CG9394	CG9394, isoform A [Drosophila melanogaster]	20	679	0.737	0.124201	-0.440263	0.905876
NP_650283.1	Droj2	DnaJ-like-2, isoform A [Drosophila melanogaster]	23	403	1.517	0.124263	0.601221	0.905658
NP_001260668.1	l(2)k14505	lethal (2) k14505, isoform B [Drosophila melanogaster]	5	279	0.462	0.124534	-1.11404	0.904711
NP_610184.2	Gp210	glycoprotein 210 kDa, isoform A [Drosophila melanogaster]	23	1876	0.65	0.124746	-0.621488	0.903974
NP_722765.2	AIF	apoptosis inducing factor, isoform B [Drosophila melanogaster]	38	739	0.803	0.12577	-0.316528	0.900422
NP_001259878.1	mRpL48	mitochondrial ribosomal protein L48, isoform B [Drosophila melanogaster]	5	181	0.522	0.126325	-0.937878	0.898511
NP_001036652.1	mRpS5	mitochondrial ribosomal protein S5, isoform C [Drosophila melanogaster]	8	407	0.646	0.126765	-0.630394	0.897
NP_611853.2	CG2970	CG2970, isoform A [Drosophila melanogaster]	26	366	0.593	0.127072	-0.753896	0.895951
NP_728910.1	mge	maggie, isoform B [Drosophila melanogaster]	1	122	2.302	0.127158	1.20289	0.895655
NP_573063.1	CG11679	uncharacterized protein Dmel_CG11679 [Drosophila melanogaster]	7	420	0.82	0.127377	-0.286304	0.89491
NP_723319.1	LanB1	LanB1, isoform B [Drosophila melanogaster]	29	1788	1.661	0.127549	0.732052	0.894324
NP_001286079.1	Swip-1	Swiprosin-1, isoform B [Drosophila melanogaster]	5	217	1.907	0.12808	0.931305	0.892517
NP_651621.2	CG12413	uncharacterized protein Dmel_CG12413 [Drosophila melanogaster]	19	696	0.647	0.13023	-0.628162	0.885288
NP_731506.1	CG45078	uncharacterized protein Dmel_CG45078 [Drosophila melanogaster]	5	163	2.061	0.131892	1.04334	0.879781
NP_001260810.1	Acsl	Acyl-CoA synthetase long-chain, isoform J [Drosophila melanogaster]	47	728	0.715	0.134981	-0.483985	0.869728
NP_730974.1	CG31548	uncharacterized protein Dmel_CG31548 [Drosophila melanogaster]	9	256	0.644	0.135282	-0.634867	0.868762
NP_525122.1	NitFhit	nitrilase and fragile histidine triad fusion protein [Drosophila melanogaster]	5	460	0.728	0.135382	-0.45799	0.86844
NP_524364.2	FK506-bp1	FK506-binding protein 1 [Drosophila melanogaster]	16	357	0.635	0.136788	-0.655172	0.863953
NP_731596.1	Jupiter	jupiter, isoform A [Drosophila melanogaster]	1	197	2.039	0.137991	1.02786	0.86015
NP_651208.1	CG5991	CG5991, isoform A [Drosophila melanogaster]	13	447	0.533	0.138071	-0.907793	0.859899
NP_608827.1	Tps1	Trehalose-6-phosphate synthase 1 [Drosophila melanogaster]	32	809	1.607	0.139235	0.68437	0.856252
NP_001162992.1	Mhc	myosin heavy chain, isoform P [Drosophila melanogaster]	1	1949	0.464	0.140342	-1.1078	0.852811
NP_648509.1	CG10361	uncharacterized protein Dmel_CG10361 [Drosophila melanogaster]	4	417	1.599	0.140918	0.67717	0.851033
NP_652351.1	CG15386	uncharacterized protein Dmel_CG15386 [Drosophila melanogaster]	5	77	0.647	0.14173	-0.628162	0.84854
NP_524106.3	fax	failed axon connections, isoform A [Drosophila melanogaster]	40	418	2.749	0.142071	1.45891	0.847495
NP_001285925.1	CG15293	uncharacterized protein Dmel_CG15293, isoform C [Drosophila melanogaster]	20	333	1.628	0.142131	0.703101	0.847311
NP_001261758.1	Ncc69	sodium chloride cotransporter 69, isoform E [Drosophila melanogaster]	2	1207	1.659	0.14311	0.730314	0.84433
NP_649413.3	CG11241	uncharacterized protein Dmel_CG11241, isoform A [Drosophila melanogaster]	4	508	0.4	0.14356	-1.32193	0.842966
NP_524116.2	Su(P)	suppressor of ref(2)P sterility [Drosophila melanogaster]	13	417	0.484	0.143979	-1.04692	0.841702
NP_651578.1	CG5590	CG5590 [Drosophila melanogaster]	23	412	1.734	0.144266	0.794104	0.840836
NP_001027401.1	CG18003	uncharacterized protein Dmel_CG18003 [Drosophila melanogaster]	13	366	2.063	0.14458	1.04474	0.839891
NP_609401.2	CG5188	CG5188 [Drosophila melanogaster]	4	317	0.21	0.145604	-2.25154	0.836826
NP_611297.3	CG10914	uncharacterized protein Dmel_CG10914 [Drosophila melanogaster]	4	624	0.664	0.146333	-0.590745	0.834657
NP_524714.1	hoip	hoi-polloi, isoform A [Drosophila melanogaster]	3	127	0.538	0.146349	-0.894322	0.834609
NP_610743.2	Cyp6g1	Cyp6g1, isoform A [Drosophila melanogaster]	12	524	1.577	0.146779	0.657183	0.833337
NP_652337.2	CG42540	uncharacterized protein Dmel_CG42540, isoform F [Drosophila melanogaster]	1	506	2.874	0.147805	1.52306	0.830312
NP_727896.1	CG8974	CG8974, isoform A [Drosophila melanogaster]	5	277	1.994	0.148578	0.995665	0.828045
NP_996395.1	alpha-Man-Ia	alpha-Mannosidase class I a, isoform H [Drosophila melanogaster]	1	667	1.887	0.149015	0.916094	0.82677
NP_477281.1	Alas	aminolevulinate synthase [Drosophila melanogaster]	5	539	1.659	0.149912	0.730314	0.824163
NP_650840.1	Arc42	Arc42 [Drosophila melanogaster]	13	405	0.699	0.15034	-0.516636	0.822926
NP_001097685.2	Cdep	Chondrocyte-derived ezrin-like domain containing protein, isoform G [Drosophila melanogaster]	54	4273	1.913	0.150583	0.935837	0.822223
NP_611468.1	CG9090	CG9090, isoform A [Drosophila melanogaster]	20	374	0.63	0.152421	-0.666576	0.816954
NP_001138111.1	CG42235	uncharacterized protein Dmel_CG42235, isoform B [Drosophila melanogaster]	4	695	1.378	0.152662	0.462576	0.816268
NP_609040.1	CG9547	CG9547 [Drosophila melanogaster]	9	419	0.81	0.152692	-0.304006	0.816183
NP_730944.2	Pi4KIIalpha	Pi4KIIalpha, isoform A [Drosophila melanogaster]	11	710	1.472	0.15301	0.557778	0.81528
NP_524537.1	mRpS22	mitochondrial ribosomal protein S22 [Drosophila melanogaster]	9	393	0.331	0.154056	-1.5951	0.812321
NP_732726.2	CG43343	uncharacterized protein Dmel_CG43343, isoform A [Drosophila melanogaster]	5	1304	2.065	0.154285	1.04614	0.811677
NP_611413.2	CG11961	uncharacterized protein Dmel_CG11961, isoform B [Drosophila melanogaster]	2	867	3.345	0.155182	1.74201	0.809159
NP_609665.2	ics	icarus, isoform A [Drosophila melanogaster]	5	283	2.286	0.155356	1.19283	0.808673
NP_724496.1	Eb1	Eb1, isoform A [Drosophila melanogaster]	5	291	1.608	0.156203	0.685267	0.80631
NP_001261450.1	S6k	ribosomal protein S6 kinase, isoform B [Drosophila melanogaster]	3	490	2.118	0.157864	1.0827	0.801716
NP_523741.2	Hsc70-5	heat shock protein cognate 5, isoform A [Drosophila melanogaster]	77	686	0.743	0.159198	-0.428566	0.798061
NP_001247301.1	RpS27	ribosomal protein S27, isoform B [Drosophila melanogaster]	6	84	2.072	0.159555	1.05102	0.79709
NP_996375.1	sdt	stardust, isoform D [Drosophila melanogaster]	17	879	1.448	0.160316	0.534062	0.795024
NP_609100.1	CG4495	CG4495, isoform A [Drosophila melanogaster]	8	524	1.18	0.162044	0.238787	0.790368
NP_723086.1	CG31648	uncharacterized protein Dmel_CG31648 [Drosophila melanogaster]	3	241	0.65	0.164088	-0.621488	0.784923
NP_725867.1	wbl	windbeutel, isoform A [Drosophila melanogaster]	10	257	2.417	0.16476	1.27322	0.783149
NP_651762.1	CG7920	CG7920, isoform A [Drosophila melanogaster]	33	477	0.69	0.165188	-0.535332	0.782021
NP_733058.1	CG31121	uncharacterized protein Dmel_CG31121, isoform A [Drosophila melanogaster]	2	911	1.898	0.166326	0.92448	0.77904
NP_995648.1	Pvr	PDGF- and VEGF-receptor related, isoform E [Drosophila melanogaster]	1	1503	1.831	0.166371	0.872632	0.778922
NP_001188553.1	CG2059	CG2059, isoform B [Drosophila melanogaster]	5	308	0.757	0.166707	-0.401635	0.778047
NP_001163242.1	CG42497	uncharacterized protein Dmel_CG42497 [Drosophila melanogaster]	3	65	0.589	0.167079	-0.76366	0.777078
NP_647946.1	CG10672	uncharacterized protein Dmel_CG10672 [Drosophila melanogaster]	17	317	0.682	0.167459	-0.552156	0.776093
NP_610813.3	CG8768	CG8768 [Drosophila melanogaster]	12	302	0.581	0.168	-0.78339	0.774691
NP_524367.1	Act88F	actin 88F [Drosophila melanogaster]	3	376	1.377	0.168123	0.461529	0.774373
NP_001015354.3	CG17691	uncharacterized protein Dmel_CG17691, isoform E [Drosophila melanogaster]	2	364	0.695	0.168486	-0.524915	0.773436
NP_001245946.1	Glt	glutactin, isoform D [Drosophila melanogaster]	21	1026	1.238	0.168637	0.308011	0.773047
NP_611063.1	Gpo-1	glycerophosphate oxidase-1, isoform C [Drosophila melanogaster]	71	724	0.694	0.168866	-0.526992	0.772458
NP_001246793.1	CG4729	CG4729, isoform E [Drosophila melanogaster]	8	397	1.193	0.169022	0.254594	0.772056
NP_727696.2	CG1640	CG1640, isoform B [Drosophila melanogaster]	33	575	0.71	0.169337	-0.494109	0.771248
NP_001162894.1	Kr-h2	kruppel homolog 2, isoform B [Drosophila melanogaster]	9	276	0.831	0.170044	-0.26708	0.769439
NP_001246827.1	CG6852	CG6852, isoform C [Drosophila melanogaster]	2	114	0.759	0.171017	-0.397828	0.76696
NP_650880.2	Sirt2	sirtuin 2, isoform A [Drosophila melanogaster]	4	355	1.64	0.172329	0.713696	0.763641
NP_001036641.1	Snap25	Synaptosomal-associated protein 25kDa, isoform A [Drosophila melanogaster]	12	212	1.265	0.173404	0.339137	0.760941
NP_001247362.1	RpS8	ribosomal protein S8, isoform E [Drosophila melanogaster]	15	208	1.644	0.173805	0.71721	0.759939
NP_001286058.1	Irk3	inwardly rectifying potassium channel 3, isoform C [Drosophila melanogaster]	1	205	9.774	0.174703	3.28895	0.7577
NP_611346.1	CG5323	CG5323 [Drosophila melanogaster]	8	146	0.747	0.175138	-0.42082	0.756619
NP_001246230.1	brp	bruchpilot, isoform L [Drosophila melanogaster]	1	1781	1.771	0.175172	0.824564	0.756536
NP_523735.2	Cp1	cysteine proteinase-1, isoform C [Drosophila melanogaster]	24	371	0.59	0.175426	-0.761213	0.755906
NP_524597.1	Sap-r	Saposin-related, isoform A [Drosophila melanogaster]	13	953	0.443	0.178185	-1.17462	0.749129
NP_477209.2	T3dh	type III alcohol dehydrogenase [Drosophila melanogaster]	9	464	1.395	0.178362	0.480265	0.748698
NP_611410.1	EndoB	endophilin B, isoform A [Drosophila melanogaster]	15	390	1.288	0.181516	0.365133	0.741085
NP_649971.1	mtTFB2	mitochondrial transcription factor B2 [Drosophila melanogaster]	6	452	0.716	0.182056	-0.481969	0.739796
NP_476761.3	awd	abnormal wing discs, isoform C [Drosophila melanogaster]	7	168	0.524	0.18235	-0.932361	0.739094
NP_730713.1	Csp	cysteine string protein, isoform B [Drosophila melanogaster]	8	249	1.277	0.182729	0.352759	0.738193
NP_729400.1	Cpr66D	cuticular protein 66D [Drosophila melanogaster]	9	270	1.988	0.18278	0.991318	0.738071
NP_001285697.1	Coprox	coproporphyrinogen oxidase, isoform B [Drosophila melanogaster]	12	390	0.678	0.184613	-0.560643	0.733738
NP_725653.1	GstS1	glutathione S transferase S1, isoform A [Drosophila melanogaster]	3	249	1.981	0.185401	0.986229	0.731887
NP_001261446.1	sif	still life, isoform J [Drosophila melanogaster]	8	2734	1.787	0.186476	0.83754	0.729378
NP_611264.2	CG5009	CG5009 [Drosophila melanogaster]	36	669	1.498	0.187068	0.583038	0.728
NP_649301.1	CG11309	uncharacterized protein Dmel_CG11309, isoform A [Drosophila melanogaster]	11	358	0.659	0.188719	-0.60165	0.724183
NP_726060.3	CG42672	uncharacterized protein Dmel_CG42672, isoform M [Drosophila melanogaster]	1	1552	0.395	0.189219	-1.34008	0.723036
NP_731972.1	Mf	myofilin, isoform C [Drosophila melanogaster]	1	168	1.725	0.191295	0.786596	0.718297
NP_524022.1	mRpL2	mitochondrial ribosomal protein L2 [Drosophila melanogaster]	12	294	1.419	0.19419	0.504875	0.711773
NP_649757.1	CG2767	CG2767 [Drosophila melanogaster]	21	329	1.176	0.194584	0.233888	0.710894
NP_001285318.1	Mfe2	peroxisomal multifunctional enzyme type 2, isoform B [Drosophila melanogaster]	37	598	1.556	0.195523	0.637842	0.708802
NP_611693.1	RpS24	ribosomal protein S24 [Drosophila melanogaster]	5	131	1.519	0.195548	0.603122	0.708746
NP_612043.1	Reg-2	rhythmically expressed gene 2 [Drosophila melanogaster]	10	260	1.378	0.198201	0.462576	0.702894
NP_001137723.2	CG42672	uncharacterized protein Dmel_CG42672, isoform J [Drosophila melanogaster]	1	1500	1.506	0.202	0.590722	0.69465
NP_524664.1	spag	spaghetti [Drosophila melanogaster]	6	534	2.167	0.207798	1.1157	0.682359
NP_648121.1	Rac2	Rac2, isoform A [Drosophila melanogaster]	4	192	1.34	0.208137	0.422233	0.68165
NP_523375.2	mbt	mushroom bodies tiny [Drosophila melanogaster]	3	639	1.771	0.208363	0.824564	0.68118
NP_001262777.1	Syp	syncrip, isoform J [Drosophila melanogaster]	3	761	1.535	0.208753	0.618239	0.680368
NP_001027175.1	sea	scheggia, isoform E [Drosophila melanogaster]	24	317	0.552	0.208975	-0.85726	0.679905
NP_650190.1	CG5167	CG5167 [Drosophila melanogaster]	30	431	0.791	0.210192	-0.33825	0.677384
NP_726377.1	kcc	kazachoc, isoform D [Drosophila melanogaster]	1	1074	2.057	0.210278	1.04054	0.677206
NP_609479.1	dUTPase	deoxyuridine triphosphatase, isoform A [Drosophila melanogaster]	8	188	0.481	0.210635	-1.05589	0.676469
NP_523687.1	Rab3	Rab3 [Drosophila melanogaster]	4	220	1.305	0.21088	0.38405	0.675965
NP_001259446.1	dlg1	discs large 1, isoform R [Drosophila melanogaster]	1	1001	2.126	0.210887	1.08814	0.67595
NP_001261826.1	Fbp1	Fat body protein 1, isoform D [Drosophila melanogaster]	1	1027	1.904	0.21179	0.929033	0.674095
NP_610995.1	SMC2	structural maintenance of chromosomes 2 [Drosophila melanogaster]	4	1179	0.564	0.212306	-0.826233	0.673038
NP_648499.1	mtTFB1	mitochondrial transcription factor B1 [Drosophila melanogaster]	3	330	0.625	0.214077	-0.678072	0.66943
NP_728614.1	Psa	puromycin sensitive aminopeptidase, isoform C [Drosophila melanogaster]	34	1075	1.354	0.214105	0.437228	0.669373
NP_730923.1	Cerk	ceramide kinase, isoform A [Drosophila melanogaster]	7	687	0.717	0.214833	-0.479955	0.6679
NP_725114.1	RpS11	ribosomal protein S11, isoform C [Drosophila melanogaster]	7	155	1.377	0.215139	0.461529	0.66728
NP_001260290.1	Aldh	aldehyde dehydrogenase, isoform B [Drosophila melanogaster]	27	520	0.672	0.215433	-0.573467	0.666688
NP_610933.1	CG8323	CG8323 [Drosophila melanogaster]	6	303	0.811	0.216447	-0.302226	0.664649
NP_649004.1	CG7460	CG7460, isoform B [Drosophila melanogaster]	14	486	1.433	0.216958	0.519039	0.663624
NP_001262163.1	Glg1	golgi complex-localized glycoprotein 1, isoform B [Drosophila melanogaster]	15	1107	0.773	0.217152	-0.37146	0.663235
NP_536731.1	Cat	catalase [Drosophila melanogaster]	38	506	1.356	0.218437	0.439357	0.660673
NP_001259822.1	RpLP1	ribosomal protein LP1, isoform B [Drosophila melanogaster]	6	112	0.521	0.218782	-0.940645	0.659988
NP_730957.1	Vha26	vacuolar H[+]-ATPase 26kD subunit, isoform A [Drosophila melanogaster]	24	226	0.395	0.221891	-1.34008	0.653861
NP_001137767.1	CG42371	uncharacterized protein Dmel_CG42371 [Drosophila melanogaster]	2	87	0.794	0.222026	-0.332789	0.653596
NP_648284.1	CG5144	CG5144 [Drosophila melanogaster]	4	388	2.038	0.222438	1.02715	0.65279
NP_001245490.1	tko	technical knockout, isoform C [Drosophila melanogaster]	4	154	0.82	0.224215	-0.286304	0.649335
NP_573057.1	CG9281	CG9281, isoform B [Drosophila melanogaster]	15	611	1.389	0.22441	0.474047	0.648958
NP_524532.2	Klp98A	Kinesin-like protein at 98A, isoform A [Drosophila melanogaster]	2	1265	1.786	0.225157	0.836732	0.647515
NP_609362.1	CG5676	CG5676 [Drosophila melanogaster]	11	156	0.619	0.226955	-0.691989	0.64406
NP_730435.2	Lon	Lon protease, isoform C [Drosophila melanogaster]	2	1024	1.509	0.22734	0.593593	0.643324
NP_649568.1	elm	ethanol sensitive with low memory, isoform A [Drosophila melanogaster]	4	189	0.473	0.227415	-1.08009	0.643181
NP_726379.1	kcc	kazachoc, isoform B [Drosophila melanogaster]	3	1028	1.697	0.227664	0.762987	0.642706
NP_523764.1	RpLP2	ribosomal protein LP2 [Drosophila melanogaster]	6	113	0.371	0.229455	-1.43051	0.639303
NP_650327.1	Cyp6d5	Cyp6d5 [Drosophila melanogaster]	33	508	0.596	0.232345	-0.746616	0.633866
NP_724022.2	CG13284	uncharacterized protein Dmel_CG13284, isoform B [Drosophila melanogaster]	9	339	0.504	0.232439	-0.988504	0.633692
NP_652031.2	Prosbeta1	proteasome beta1 subunit [Drosophila melanogaster]	4	224	1.217	0.232923	0.283329	0.632788
NP_610914.2	CG16935	uncharacterized protein Dmel_CG16935, isoform A [Drosophila melanogaster]	16	357	0.652	0.234262	-0.617056	0.630298
NP_728257.2	l(1)G0156	lethal (1) G0156, isoform C [Drosophila melanogaster]	1	354	1.91	0.236477	0.933573	0.626211
NP_001247221.1	Mvl	malvolio, isoform G [Drosophila melanogaster]	1	607	2.774	0.237138	1.47197	0.624999
NP_001137642.1	metro	menage a trois, isoform B [Drosophila melanogaster]	2	556	1.534	0.237439	0.617298	0.624447
NP_001285121.1	Gs2	glutamine synthetase 2, isoform D [Drosophila melanogaster]	18	373	1.328	0.237724	0.409255	0.623928
NP_728245.1	mRpS14	mitochondrial ribosomal protein S14, isoform A [Drosophila melanogaster]	1	128	0.601	0.238171	-0.734563	0.623111
NP_649835.1	Tcp-1eta	Tcp-1eta [Drosophila melanogaster]	21	544	1.497	0.240704	0.582074	0.618517
NP_001262890.1	CG13601	uncharacterized protein Dmel_CG13601, isoform B [Drosophila melanogaster]	10	277	0.48	0.240761	-1.05889	0.618414
NP_001260332.1	CG5045	CG5045, isoform B [Drosophila melanogaster]	7	253	0.764	0.243139	-0.388355	0.614145
NP_652724.1	CG3267	CG3267 [Drosophila melanogaster]	19	578	0.784	0.244815	-0.351074	0.611163
NP_733270.1	Vha100-1	vacuolar H[+] ATPase 100kD subunit 1, isoform C [Drosophila melanogaster]	4	855	1.236	0.244957	0.305679	0.61091
NP_651094.2	CG17141	uncharacterized protein Dmel_CG17141 [Drosophila melanogaster]	2	323	0.691	0.248787	-0.533242	0.604172
NP_608954.1	CG11147	uncharacterized protein Dmel_CG11147, isoform A [Drosophila melanogaster]	9	711	0.821	0.250153	-0.284546	0.601794
NP_001261269.1	nSyb	neuronal synaptobrevin, isoform J [Drosophila melanogaster]	10	206	1.826	0.250213	0.868687	0.60169
NP_001027115.1	Hsp22	heat shock protein 22, isoform A [Drosophila melanogaster]	25	174	2.149	0.251922	1.10367	0.598733
NP_731635.2	ClC-a	chloride channel-a, isoform A [Drosophila melanogaster]	9	1176	1.412	0.252662	0.49774	0.59746
NP_648064.1	CG10075	uncharacterized protein Dmel_CG10075 [Drosophila melanogaster]	6	259	0.542	0.254626	-0.883635	0.594097
NP_001245892.1	Lam	lamin, isoform B [Drosophila melanogaster]	55	622	2.144	0.257826	1.1003	0.588673
NP_722836.1	CG2862	CG2862, isoform B [Drosophila melanogaster]	5	126	0.662	0.260119	-0.595097	0.584827
NP_608886.1	CG14043	uncharacterized protein Dmel_CG14043 [Drosophila melanogaster]	2	600	1.412	0.262	0.49774	0.581699
NP_001163275.2	Pde8	phosphodiesterase 8, isoform O [Drosophila melanogaster]	2	1050	2.092	0.263676	1.06488	0.578929
NP_611952.1	CG3663	CG3663 [Drosophila melanogaster]	12	208	0.403	0.264413	-1.31115	0.577716
NP_001189056.1	Sh3beta	Sh3beta, isoform D [Drosophila melanogaster]	1	216	1.76	0.264709	0.815575	0.577231
NP_611187.1	CG6984	CG6984 [Drosophila melanogaster]	6	285	0.766	0.264817	-0.384584	0.577054
NP_001260134.1	CG9531	CG9531, isoform B [Drosophila melanogaster]	5	323	1.352	0.265134	0.435095	0.576534
NP_649579.2	CG1236	CG1236 [Drosophila melanogaster]	9	347	1.437	0.267431	0.52306	0.572788
NP_569970.2	moody	moody, isoform A [Drosophila melanogaster]	1	670	1.852	0.267663	0.889084	0.572412
NP_572836.1	CG32649	uncharacterized protein Dmel_CG32649 [Drosophila melanogaster]	21	661	0.815	0.267816	-0.295128	0.572163
NP_647949.1	CG4611	CG4611 [Drosophila melanogaster]	9	703	0.738	0.269416	-0.438307	0.569577
NP_732456.1	CG4572	CG4572, isoform A [Drosophila melanogaster]	16	482	0.696	0.269579	-0.522841	0.569314
NP_572304.5	CG3566	CG3566, isoform B [Drosophila melanogaster]	11	117	0.636	0.270649	-0.652901	0.567593
NP_651711.1	Obp99c	Odorant-binding protein 99c, isoform A [Drosophila melanogaster]	7	151	1.913	0.272537	0.935837	0.564575
NP_723992.1	VhaSFD	vacuolar H[+]-ATPase SFD subunit, isoform B [Drosophila melanogaster]	18	542	0.469	0.272734	-1.09234	0.564261
NP_724880.1	CG2269	CG2269, isoform B [Drosophila melanogaster]	7	783	1.861	0.272921	0.896078	0.563964
NP_524211.1	RpLP0	ribosomal protein LP0, isoform A [Drosophila melanogaster]	21	317	0.749	0.273822	-0.416962	0.562532
NP_611353.1	CG5482	CG5482, isoform A [Drosophila melanogaster]	25	397	1.436	0.276006	0.522056	0.559081
NP_611409.2	CG7461	CG7461, isoform B [Drosophila melanogaster]	40	627	0.552	0.276658	-0.85726	0.558057
NP_647716.1	CG8993	CG8993 [Drosophila melanogaster]	4	142	0.549	0.276905	-0.865122	0.557669
NP_620470.1	26-29-p	26-29kD-proteinase [Drosophila melanogaster]	19	549	0.757	0.278193	-0.401635	0.555655
NP_725830.1	CG15096	uncharacterized protein Dmel_CG15096, isoform B [Drosophila melanogaster]	1	475	0.731	0.279693	-0.452057	0.553319
NP_651247.1	CG6432	CG6432, isoform A [Drosophila melanogaster]	6	674	0.615	0.279779	-0.701342	0.553184
NP_524470.4	Gdh	glutamate dehydrogenase, isoform A [Drosophila melanogaster]	3	562	1.199	0.280745	0.261832	0.551688
NP_609980.1	CG10166	uncharacterized protein Dmel_CG10166 [Drosophila melanogaster]	4	241	0.467	0.281244	-1.09851	0.550917
NP_610939.2	RpS23	ribosomal protein S23, isoform A [Drosophila melanogaster]	9	143	1.36	0.281642	0.443607	0.550302
NP_611234.1	CG6484	CG6484 [Drosophila melanogaster]	5	465	0.553	0.282247	-0.854649	0.549371
NP_726309.3	Rpi	Ribose-5-phosphate isomerase, isoform B [Drosophila melanogaster]	4	241	0.665	0.283741	-0.588574	0.547078
NP_001260514.1	Cyt-b5-r	cytochrome b5-related, isoform B [Drosophila melanogaster]	11	436	1.374	0.284443	0.458382	0.546005
NP_524380.1	mRpS33	mitochondrial ribosomal protein S33 [Drosophila melanogaster]	2	113	0.521	0.284688	-0.940645	0.54563
NP_001097814.1	Fas1	fasciclin 1, isoform D [Drosophila melanogaster]	42	662	1.162	0.285736	0.21661	0.544035
NP_001097610.1	CG12355	uncharacterized protein Dmel_CG12355, isoform B [Drosophila melanogaster]	2	204	0.724	0.286381	-0.465938	0.543056
NP_523946.1	sfl	sulfateless, isoform A [Drosophila melanogaster]	2	1048	1.922	0.286457	0.942608	0.54294
NP_727091.1	kdn	knockdown, isoform B [Drosophila melanogaster]	30	522	0.821	0.287107	-0.284546	0.541956
NP_001163064.1	l(2)01289	lethal (2) 01289, isoform G [Drosophila melanogaster]	1	1191	1.947	0.288253	0.961253	0.540226
NP_476773.1	tud	tudor, isoform A [Drosophila melanogaster]	14	2515	1.576	0.2886	0.656268	0.539703
NP_524104.2	mRpS34	mitochondrial ribosomal protein S34 [Drosophila melanogaster]	10	188	0.657	0.288984	-0.606035	0.539126
NP_001015316.1	CG17514	uncharacterized protein Dmel_CG17514, isoform A [Drosophila melanogaster]	24	2630	1.38	0.289215	0.464668	0.538779
NP_001261796.1	trn	tartan, isoform B [Drosophila melanogaster]	1	751	2.115	0.29021	1.08066	0.537287
NP_001246928.1	mtd	mustard, isoform V [Drosophila melanogaster]	20	1344	1.308	0.290803	0.387363	0.536401
NP_523415.1	AP-1-2beta	adaptor protein complex 1/2, beta subunit [Drosophila melanogaster]	13	921	1.539	0.29127	0.621993	0.535704
NP_001137900.1	CG42307	uncharacterized protein Dmel_CG42307, isoform B [Drosophila melanogaster]	4	95	0.705	0.294278	-0.504305	0.531243
NP_001303469.1	CG11035	uncharacterized protein Dmel_CG11035, isoform B [Drosophila melanogaster]	8	231	0.624	0.294744	-0.680382	0.530555
NP_001247129.1	msps	mini spindles, isoform D [Drosophila melanogaster]	24	2082	1.361	0.295883	0.444667	0.52888
NP_001246276.1	Cam	calmodulin, isoform C [Drosophila melanogaster]	4	149	0.567	0.296365	-0.818579	0.528174
NP_511105.2	alpha-Man-Ia	alpha-Mannosidase class I a, isoform K [Drosophila melanogaster]	2	643	1.349	0.29738	0.43189	0.526688
NP_651703.1	CG1907	CG1907 [Drosophila melanogaster]	18	317	0.726	0.298643	-0.461959	0.524848
NP_524848.1	Hex-A	hexokinase A, isoform A [Drosophila melanogaster]	6	541	0.719	0.299048	-0.475936	0.524258
NP_648144.3	CG7506	CG7506 [Drosophila melanogaster]	8	236	0.611	0.300563	-0.710756	0.522065
NP_650565.2	CG10340	uncharacterized protein Dmel_CG10340 [Drosophila melanogaster]	11	278	0.716	0.300996	-0.481969	0.52144
NP_608676.2	CG15390	uncharacterized protein Dmel_CG15390 [Drosophila melanogaster]	2	275	0.586	0.301476	-0.771027	0.520747
NP_995893.1	par-1	par-1, isoform H [Drosophila melanogaster]	7	993	2.217	0.302643	1.14861	0.519069
NP_733286.1	Cnx99A	calnexin 99A, isoform A [Drosophila melanogaster]	6	605	1.357	0.303141	0.440421	0.518355
NP_001263137.1	chp	chaoptin, isoform D [Drosophila melanogaster]	54	1338	1.388	0.304138	0.473008	0.51693
NP_001259772.1	CG14613	uncharacterized protein Dmel_CG14613, isoform B [Drosophila melanogaster]	3	241	1.381	0.30605	0.465713	0.514208
NP_524421.1	RpS20	ribosomal protein S20 [Drosophila melanogaster]	8	120	1.32	0.309051	0.400538	0.50997
NP_610588.2	Cyp49a1	Cyp49a1, isoform A [Drosophila melanogaster]	2	589	1.446	0.309529	0.532068	0.509299
NP_787990.1	tkv	thickveins, isoform C [Drosophila melanogaster]	3	575	0.794	0.311819	-0.332789	0.506097
NP_523899.1	Hsp83	heat shock protein 83, isoform A [Drosophila melanogaster]	58	717	1.537	0.312022	0.620117	0.505815
NP_523800.1	Act57B	actin 57B [Drosophila melanogaster]	5	376	1.509	0.312567	0.593593	0.505057
NP_727450.1	sesB	stress-sensitive B, isoform B [Drosophila melanogaster]	34	299	0.537	0.312815	-0.897006	0.504712
NP_729634.1	CG6404	CG6404, isoform A [Drosophila melanogaster]	12	441	1.992	0.315673	0.994218	0.500763
NP_001246407.1	CG5174	CG5174, isoform O [Drosophila melanogaster]	3	369	1.24	0.315731	0.31034	0.500682
NP_648555.1	CAH2	carbonic anhydrase 2, isoform A [Drosophila melanogaster]	9	335	0.852	0.31657	-0.231075	0.49953
NP_726025.1	Treh	trehalase, isoform C [Drosophila melanogaster]	24	596	0.6	0.317744	-0.736966	0.497923
NP_524476.1	mRpS24	mitochondrial ribosomal protein S24 [Drosophila melanogaster]	1	165	0.441	0.319341	-1.18115	0.495746
NP_001261304.1	sls	sallimus, isoform P [Drosophila melanogaster]	102	18468	1.277	0.320022	0.352759	0.49482
NP_572524.1	CG7033	CG7033 [Drosophila melanogaster]	23	535	1.296	0.320558	0.374066	0.494093
NP_788752.2	Ppn	papilin, isoform E [Drosophila melanogaster]	10	2898	0.771	0.321057	-0.375197	0.493419
NP_650680.1	CG7215	CG7215, isoform A [Drosophila melanogaster]	3	130	1.436	0.321213	0.522056	0.493207
NP_524053.2	RpS4	ribosomal protein S4, isoform B [Drosophila melanogaster]	14	261	1.337	0.325183	0.418999	0.487873
NP_610433.1	Tom7	translocase of outer membrane 7, isoform A [Drosophila melanogaster]	1	54	0.433	0.325634	-1.20756	0.48727
NP_996216.1	Tm1	tropomyosin 1, isoform L [Drosophila melanogaster]	4	284	1.644	0.32728	0.71721	0.485081
NP_476985.1	ox	oxen [Drosophila melanogaster]	3	55	0.589	0.329081	-0.76366	0.482697
NP_728423.1	slgA	sluggish A, isoform D [Drosophila melanogaster]	1	681	0.56	0.329681	-0.836501	0.481906
NP_608326.1	CG14207	uncharacterized protein Dmel_CG14207, isoform A [Drosophila melanogaster]	1	183	1.278	0.330883	0.353888	0.480325
NP_728885.1	CG32267	uncharacterized protein Dmel_CG32267 [Drosophila melanogaster]	3	49	0.779	0.332654	-0.360305	0.478007
NP_609218.1	CG13390	uncharacterized protein Dmel_CG13390 [Drosophila melanogaster]	6	381	0.766	0.335418	-0.384584	0.474414
NP_650782.1	Cyp12a5	Cyp12a5 [Drosophila melanogaster]	10	536	0.513	0.337061	-0.962969	0.472292
NP_651987.1	Vha36-1	vacuolar H[+] ATPase 36kD subunit 1 [Drosophila melanogaster]	14	246	0.282	0.339443	-1.82623	0.469234
NP_652625.2	Ugt86Dc	Ugt86Dc [Drosophila melanogaster]	1	521	0.472	0.339992	-1.08314	0.468531
NP_648062.2	CG10077	uncharacterized protein Dmel_CG10077, isoform A [Drosophila melanogaster]	14	818	1.285	0.340496	0.361768	0.467888
NP_649017.1	CG7430	CG7430, isoform A [Drosophila melanogaster]	24	504	0.81	0.341505	-0.304006	0.466603
NP_650964.1	CG3301	CG3301, isoform A [Drosophila melanogaster]	2	250	1.135	0.343429	0.182692	0.464163
NP_650786.2	CG11779	uncharacterized protein Dmel_CG11779, isoform A [Drosophila melanogaster]	23	459	1.165	0.344334	0.22033	0.46302
NP_570080.1	VhaAC39-1	vacuolar H[+] ATPase AC39 subunit 1 [Drosophila melanogaster]	8	350	0.493	0.347712	-1.02034	0.45878
NP_649812.2	CG8036	CG8036, isoform B [Drosophila melanogaster]	33	626	1.165	0.348342	0.22033	0.457994
NP_731825.1	sqd	squid, isoform B [Drosophila melanogaster]	11	344	1.422	0.348458	0.507921	0.45785
NP_610254.1	CG30159	uncharacterized protein Dmel_CG30159, isoform A [Drosophila melanogaster]	15	239	0.667	0.350008	-0.584241	0.455922
NP_724597.1	CG18812	uncharacterized protein Dmel_CG18812, isoform C [Drosophila melanogaster]	3	540	1.283	0.350676	0.359521	0.455094
NP_726394.1	Phm	Peptidylglycine-alpha-hydroxylating monooxygenase, isoform B [Drosophila melanogaster]	6	365	1.28	0.353075	0.356144	0.452133
NP_729118.1	Rcc1	regulator of chromosome condensation 1, isoform B [Drosophila melanogaster]	20	547	0.606	0.354936	-0.72261	0.44985
NP_524708.1	Acon	aconitase, isoform B [Drosophila melanogaster]	58	787	0.822	0.356524	-0.28279	0.447911
NP_524387.1	Prx3	peroxiredoxin 3 [Drosophila melanogaster]	16	234	0.691	0.358263	-0.533242	0.445798
NP_001260177.1	Ndae1	Na[+]-driven anion exchanger 1, isoform D [Drosophila melanogaster]	5	1134	1.471	0.359247	0.556797	0.444607
NP_001027089.1	waw	waclaw [Drosophila melanogaster]	7	696	0.822	0.359597	-0.28279	0.444184
NP_732717.1	Sar1	Secretion-associated Ras-related 1, isoform A [Drosophila melanogaster]	9	193	0.364	0.360148	-1.45799	0.44352
NP_523596.2	bsf	bicoid stability factor [Drosophila melanogaster]	98	1412	0.784	0.366221	-0.351074	0.436257
NP_511106.1	Gip	GIP-like [Drosophila melanogaster]	8	264	0.673	0.366412	-0.571322	0.43603
NP_730023.1	CTPsyn	CTP synthase, isoform A [Drosophila melanogaster]	4	627	1.335	0.366468	0.41684	0.435964
NP_611843.2	DNA-ligI	DNA ligase I [Drosophila melanogaster]	2	747	0.565	0.367185	-0.823677	0.435115
NP_610724.1	CG8888	CG8888 [Drosophila melanogaster]	11	388	1.648	0.368915	0.720716	0.433074
NP_001189150.1	Pka-R1	protein kinase, cAMP-dependent, regulatory subunit type 1, isoform V [Drosophila melanogaster]	1	464	1.741	0.369377	0.799916	0.43253
NP_001303378.1	CG7970	CG7970, isoform C [Drosophila melanogaster]	3	255	1.772	0.369788	0.825379	0.432047
NP_610288.1	CG12736	uncharacterized protein Dmel_CG12736 [Drosophila melanogaster]	9	456	1.245	0.372814	0.316146	0.428508
NP_476640.1	Mlc1	myosin alkali light chain 1, isoform B [Drosophila melanogaster]	5	155	1.263	0.377914	0.336855	0.422607
NP_001286821.1	Mlp60A	muscle LIM protein at 60A, isoform C [Drosophila melanogaster]	3	486	1.458	0.378122	0.543991	0.422368
NP_001260072.1	vkg	viking, isoform C [Drosophila melanogaster]	23	1940	1.55	0.379694	0.632268	0.420566
NP_725073.1	wal	walrus, isoform A [Drosophila melanogaster]	20	330	0.838	0.380883	-0.254978	0.419209
NP_001247005.1	SpdS	spermidine synthase, isoform C [Drosophila melanogaster]	7	287	1.376	0.382397	0.46048	0.417486
NP_724614.1	Prosalpha1	proteasome alpha1 subunit, isoform A [Drosophila melanogaster]	12	244	1.233	0.384013	0.302173	0.415654
NP_001163065.1	l(2)01289	lethal (2) 01289, isoform F [Drosophila melanogaster]	16	1786	1.493	0.385479	0.578214	0.413999
NP_524197.1	ppl	pumpless [Drosophila melanogaster]	4	165	0.757	0.38552	-0.401635	0.413953
NP_609503.2	CG6488	CG6488 [Drosophila melanogaster]	1	570	1.385	0.386941	0.469886	0.412355
NP_523440.1	mRpL10	mitochondrial ribosomal protein L10 [Drosophila melanogaster]	4	248	1.266	0.390277	0.340277	0.408627
NP_649679.1	Ccp84Ae	Ccp84Ae [Drosophila melanogaster]	14	208	1.474	0.39111	0.559737	0.407701
NP_649814.1	CG8043	CG8043 [Drosophila melanogaster]	6	348	1.534	0.391298	0.617298	0.407492
NP_001259705.1	l(1)G0156	lethal (1) G0156, isoform D [Drosophila melanogaster]	2	377	1.564	0.392489	0.645241	0.406173
NP_001027102.1	CG33791	uncharacterized protein Dmel_CG33791, isoform D [Drosophila melanogaster]	1	1282	2.083	0.392625	1.05866	0.406022
NP_524109.2	Mipp1	multiple inositol polyphosphate phosphatase 1, isoform A [Drosophila melanogaster]	11	467	1.314	0.396506	0.393965	0.40175
NP_001163144.1	EfTuM	elongation factor Tu mitochondrial, isoform B [Drosophila melanogaster]	23	489	1.25	0.398248	0.321928	0.399847
NP_723470.1	Mtpalpha	mitochondrial trifunctional protein alpha subunit, isoform B [Drosophila melanogaster]	60	744	0.794	0.399919	-0.332789	0.398028
NP_649913.1	CG9399	CG9399, isoform A [Drosophila melanogaster]	6	154	0.712	0.400198	-0.490051	0.397725
NP_650822.1	CG6195	CG6195 [Drosophila melanogaster]	5	363	1.436	0.40067	0.522056	0.397213
NP_648242.1	CG5989	CG5989, isoform A [Drosophila melanogaster]	13	436	1.187	0.403145	0.24732	0.394538
NP_001260427.1	Tor	target of rapamycin, isoform B [Drosophila melanogaster]	21	2471	1.305	0.405604	0.38405	0.391898
NP_608656.1	mio	missing oocyte [Drosophila melanogaster]	3	867	1.609	0.406369	0.686164	0.391079
NP_572826.1	ade5	ade5, isoform A [Drosophila melanogaster]	20	429	1.512	0.408357	0.596458	0.38896
NP_725098.2	CG8298	CG8298, isoform C [Drosophila melanogaster]	6	596	0.812	0.41188	-0.300448	0.38523
NP_001245846.1	CG34172	uncharacterized protein Dmel_CG34172, isoform B [Drosophila melanogaster]	2	62	0.604	0.411896	-0.72738	0.385212
NP_649912.1	CG9396	CG9396 [Drosophila melanogaster]	2	151	0.69	0.412114	-0.535332	0.384983
NP_730823.2	CG11739	uncharacterized protein Dmel_CG11739, isoform C [Drosophila melanogaster]	17	321	0.792	0.41279	-0.336428	0.384271
NP_610509.2	GstT1	glutathione S transferase T1 [Drosophila melanogaster]	12	228	0.563	0.41359	-0.828793	0.38343
NP_477485.1	Actn	alpha actinin, isoform C [Drosophila melanogaster]	39	917	1.252	0.413873	0.324235	0.383132
NP_647860.1	Chd64	Chd64, isoform B [Drosophila melanogaster]	12	188	1.543	0.416761	0.625738	0.380113
NP_001260742.1	coro	coro, isoform D [Drosophila melanogaster]	1	534	1.572	0.420159	0.652601	0.376586
NP_728643.2	ABCB7	ATP binding cassette subfamily B member 7, isoform B [Drosophila melanogaster]	30	709	0.801	0.420306	-0.320126	0.376434
NP_001285263.1	CG33178	uncharacterized protein Dmel_CG33178, isoform B [Drosophila melanogaster]	3	177	1.11	0.421049	0.15056	0.375667
NP_609170.1	Sirup	Starvation-upregulated protein, isoform A [Drosophila melanogaster]	1	118	1.507	0.422713	0.591679	0.373954
NP_732958.1	Slimp	Seryl-tRNA synthetase-like insect mitochondrial protein [Drosophila melanogaster]	3	464	1.344	0.422753	0.426533	0.373914
NP_001259313.1	Tom40	translocase of outer membrane 40, isoform C [Drosophila melanogaster]	14	344	0.7	0.423332	-0.514573	0.373319
NP_001247120.1	Tm1	tropomyosin 1, isoform Q [Drosophila melanogaster]	6	250	1.35	0.424302	0.432959	0.372325
NP_477222.1	Surf4	surfeit 4 [Drosophila melanogaster]	6	270	1.215	0.429791	0.280956	0.366743
NP_572974.1	CG14407	uncharacterized protein Dmel_CG14407 [Drosophila melanogaster]	7	159	0.634	0.431063	-0.657445	0.36546
NP_732610.1	Rab1	Rab1 [Drosophila melanogaster]	14	205	0.841	0.431615	-0.249822	0.364903
NP_001285747.1	RpS13	ribosomal protein S13, isoform C [Drosophila melanogaster]	12	151	1.344	0.432828	0.426533	0.363685
NP_542445.1	Gapdh2	glyceraldehyde 3 phosphate dehydrogenase 2, isoform A [Drosophila melanogaster]	8	332	1.206	0.434835	0.27023	0.361675
NP_652700.1	CG18858	uncharacterized protein Dmel_CG18858, isoform A [Drosophila melanogaster]	12	421	0.788	0.435761	-0.343732	0.360751
NP_650192.1	Dip-C	dipeptidase C, isoform A [Drosophila melanogaster]	4	491	0.782	0.439413	-0.354759	0.357128
NP_524252.2	lap	like-AP180, isoform A [Drosophila melanogaster]	2	468	1.49	0.439415	0.575312	0.357125
NP_611537.2	RIC-3	RIC3 acetylcholine receptor chaperone, isoform C [Drosophila melanogaster]	1	505	1.945	0.443649	0.95977	0.35296
NP_610737.1	EndoG	endonuclease G [Drosophila melanogaster]	9	310	1.423	0.443961	0.508936	0.352655
NP_610780.1	CG8520	CG8520, isoform A [Drosophila melanogaster]	9	458	0.733	0.444969	-0.448115	0.35167
NP_651600.1	mfrn	mitoferrin [Drosophila melanogaster]	12	379	1.125	0.448135	0.169925	0.348591
NP_649677.1	Ccp84Ag	Ccp84Ag [Drosophila melanogaster]	7	191	0.748	0.449429	-0.41889	0.347339
NP_610294.1	Cyt-b5	cytochrome b5, isoform B [Drosophila melanogaster]	3	134	0.611	0.450309	-0.710756	0.346489
NP_649894.1	GstZ1	glutathione S transferase Z1 [Drosophila melanogaster]	2	246	0.426	0.451815	-1.23107	0.34504
NP_649560.1	RpL13A	ribosomal protein L13A, isoform B [Drosophila melanogaster]	14	205	0.844	0.452158	-0.244685	0.34471
NP_001246856.1	CG10565	uncharacterized protein Dmel_CG10565, isoform B [Drosophila melanogaster]	10	646	1.364	0.453944	0.447844	0.342998
NP_724982.1	CG30016	uncharacterized protein Dmel_CG30016 [Drosophila melanogaster]	2	113	0.482	0.454112	-1.05289	0.342837
NP_726315.1	CG13551	uncharacterized protein Dmel_CG13551, isoform B [Drosophila melanogaster]	11	107	0.456	0.458814	-1.13289	0.338364
NP_001247036.1	SelR	selenoprotein R, isoform J [Drosophila melanogaster]	2	192	1.611	0.459355	0.687956	0.337852
NP_001097431.1	CG34423	uncharacterized protein Dmel_CG34423, isoform A [Drosophila melanogaster]	7	65	1.855	0.462373	0.891419	0.335008
NP_001285142.1	sicily	severe impairment of CI with lengthened youth, isoform B [Drosophila melanogaster]	9	334	0.741	0.463596	-0.432455	0.33386
NP_727690.1	RpS15Aa	ribosomal protein S15Aa, isoform A [Drosophila melanogaster]	7	130	1.198	0.463718	0.260628	0.333746
NP_001015402.3	CG41128	uncharacterized protein Dmel_CG41128 [Drosophila melanogaster]	1	72	0.494	0.464179	-1.01742	0.333315
NP_001260063.1	mRpL28	mitochondrial ribosomal protein L28, isoform B [Drosophila melanogaster]	14	302	1.219	0.464428	0.285698	0.333082
NP_611606.1	Tim10	translocase of inner membrane 10, isoform A [Drosophila melanogaster]	2	92	0.508	0.465013	-0.9771	0.332535
NP_001287542.1	CG33970	uncharacterized protein Dmel_CG33970, isoform C [Drosophila melanogaster]	5	777	0.825	0.465298	-0.277534	0.332269
NP_723454.1	Eaat1	excitatory amino acid transporter 1, isoform B [Drosophila melanogaster]	9	479	1.19	0.466659	0.250962	0.331
NP_476801.1	Vha16-1	vacuolar H[+] ATPase 16kD subunit 1, isoform A [Drosophila melanogaster]	2	159	0.541	0.46829	-0.8863	0.329486
NP_001097270.1	tou	toutatis, isoform E [Drosophila melanogaster]	3	3131	2.47	0.468463	1.30451	0.329324
NP_611936.2	Start1	Start1, isoform A [Drosophila melanogaster]	2	583	1.386	0.469579	0.470927	0.328291
NP_647836.2	Sc2	Sc2 [Drosophila melanogaster]	16	302	0.921	0.469857	-0.118727	0.328034
NP_572181.4	l(1)G0334	lethal (1) G0334, isoform A [Drosophila melanogaster]	22	399	0.665	0.471913	-0.588574	0.326139
NP_477437.1	Vha13	vacuolar H[+] ATPase 13kD subunit, isoform A [Drosophila melanogaster]	8	117	0.418	0.472101	-1.25843	0.325965
NP_001163095.1	Pkn	protein kinase N, isoform H [Drosophila melanogaster]	7	1284	1.512	0.472243	0.596458	0.325834
NP_524321.1	Ho	heme oxygenase [Drosophila melanogaster]	11	296	0.579	0.472782	-0.788365	0.325339
NP_650829.1	CG11659	uncharacterized protein Dmel_CG11659 [Drosophila melanogaster]	5	546	1.487	0.473022	0.572405	0.325119
NP_611989.1	CG3776	CG3776, isoform A [Drosophila melanogaster]	1	263	0.502	0.473451	-0.994241	0.324725
NP_649895.1	GstZ2	glutathione S transferase Z2, isoform A [Drosophila melanogaster]	1	227	1.419	0.474706	0.504875	0.323576
NP_651849.1	CG1544	CG1544 [Drosophila melanogaster]	15	919	0.825	0.476767	-0.277534	0.321694
NP_001260247.1	CG13392	uncharacterized protein Dmel_CG13392, isoform B [Drosophila melanogaster]	5	223	0.507	0.477272	-0.979942	0.321234
NP_572332.1	CG3226	CG3226 [Drosophila melanogaster]	12	230	1.218	0.477617	0.284514	0.32092
NP_001285957.1	lace	lace, isoform B [Drosophila melanogaster]	4	597	0.897	0.478721	-0.15682	0.319917
NP_608375.1	CG9577	CG9577 [Drosophila melanogaster]	10	312	0.641	0.478801	-0.641604	0.319845
NP_001260085.1	CG5828	CG5828, isoform B [Drosophila melanogaster]	5	361	1.394	0.480321	0.479231	0.318468
NP_572742.1	prtp	pretaporter, isoform A [Drosophila melanogaster]	35	416	1.703	0.481871	0.768078	0.31707
NP_610664.1	CG13220	uncharacterized protein Dmel_CG13220, isoform A [Drosophila melanogaster]	6	153	0.488	0.482193	-1.03505	0.316779
NP_001014515.1	14-3-3zeta	14-3-3zeta, isoform J [Drosophila melanogaster]	2	248	0.538	0.48365	-0.894322	0.315469
NP_649463.2	CG9855	CG9855, isoform A [Drosophila melanogaster]	3	382	1.041	0.484361	0.0579701	0.31483
NP_476750.1	sta	stubarista, isoform A [Drosophila melanogaster]	8	270	1.197	0.487116	0.259423	0.312368
NP_001259408.1	Neb-cGP	Neb-cGP, isoform B [Drosophila melanogaster]	3	48	0.81	0.488596	-0.304006	0.31105
NP_731737.1	Past1	putative achaete scute target 1, isoform A [Drosophila melanogaster]	36	540	1.452	0.489059	0.538041	0.310639
NP_723735.2	CG31759	uncharacterized protein Dmel_CG31759, isoform C [Drosophila melanogaster]	2	564	0.779	0.489399	-0.360305	0.310337
NP_523765.1	Fen1	flap endonuclease 1 [Drosophila melanogaster]	2	385	0.763	0.489829	-0.390245	0.309955
NP_647985.1	Ppat-Dpck	bifunctional phosphopantetheine adenylyltransferase - Dephospho-CoA kinase [Drosophila melanogaster]	10	518	0.804	0.49018	-0.314733	0.309645
NP_001285602.1	mRpL27	mitochondrial ribosomal protein L27, isoform C [Drosophila melanogaster]	6	138	1.181	0.490984	0.240009	0.308933
NP_650120.1	glo	glorund, isoform A [Drosophila melanogaster]	5	586	1.245	0.495729	0.316146	0.304755
NP_652281.1	CG4186	CG4186, isoform A [Drosophila melanogaster]	2	85	0.777	0.497218	-0.364013	0.303453
NP_001285208.1	Tim9a	Tim9a, isoform B [Drosophila melanogaster]	1	95	0.65	0.497316	-0.621488	0.303368
NP_725196.1	Galphaq	G protein alpha q subunit, isoform D [Drosophila melanogaster]	2	353	0.583	0.500566	-0.778432	0.300539
NP_651959.1	Men-b	malic enzyme b, isoform A [Drosophila melanogaster]	2	617	1.411	0.503688	0.496718	0.297838
NP_609441.1	CG6415	CG6415 [Drosophila melanogaster]	9	405	0.819	0.504675	-0.288065	0.296988
NP_477090.1	Rab2	Rab2, isoform A [Drosophila melanogaster]	8	213	0.761	0.504823	-0.394032	0.296861
NP_001097193.1	CG34200	uncharacterized protein Dmel_CG34200 [Drosophila melanogaster]	1	52	0.85	0.508299	-0.234465	0.293881
NP_611981.2	CG3760	CG3760, isoform B [Drosophila melanogaster]	1	265	1.232	0.510632	0.301002	0.291892
NP_648236.1	GstO2	glutathione S transferase O2, isoform B [Drosophila melanogaster]	12	250	1.126	0.511097	0.171207	0.291496
NP_524303.2	Irp-1B	iron regulatory protein 1B [Drosophila melanogaster]	23	899	1.35	0.511487	0.432959	0.291165
NP_001036766.2	Cnx99A	calnexin 99A, isoform E [Drosophila melanogaster]	1	604	1.541	0.51384	0.623867	0.289172
NP_651278.2	Ppox	protoporphyrinogen oxidase [Drosophila melanogaster]	13	475	0.8	0.513932	-0.321928	0.289094
NP_524103.2	SsRbeta	signal sequence receptor beta [Drosophila melanogaster]	4	190	0.726	0.516075	-0.461959	0.287288
NP_001261081.1	CG15099	uncharacterized protein Dmel_CG15099, isoform B [Drosophila melanogaster]	9	2683	1.486	0.519055	0.571434	0.284787
NP_523673.1	mRpL42	mitochondrial ribosomal protein L42, isoform A [Drosophila melanogaster]	4	124	1.268	0.520696	0.342555	0.283416
NP_524942.1	l(3)87Df	lethal (3) 87Df [Drosophila melanogaster]	3	110	1.452	0.521727	0.538041	0.282557
NP_001260675.1	nrv3	nervana 3, isoform E [Drosophila melanogaster]	1	313	0.624	0.524511	-0.680382	0.280246
NP_523707.1	Cct5	T-complex chaperonin 5, isoform A [Drosophila melanogaster]	15	542	1.439	0.52646	0.525067	0.278634
NP_524284.1	mRpL19	mitochondrial ribosomal protein L19 [Drosophila melanogaster]	18	306	1.133	0.526569	0.180148	0.278545
NP_649075.1	CG14077	uncharacterized protein Dmel_CG14077, isoform B [Drosophila melanogaster]	1	289	10.338	0.527196	3.36989	0.278028
NP_724357.2	EF2	elongation factor 2, isoform D [Drosophila melanogaster]	38	844	1.1	0.528303	0.137504	0.277117
NP_649118.1	CG9451	CG9451, isoform A [Drosophila melanogaster]	3	410	0.775	0.528716	-0.367732	0.276778
NP_001285421.1	CG7378	CG7378, isoform C [Drosophila melanogaster]	1	235	1.506	0.531633	0.590722	0.274388
NP_525120.1	Nop60B	nucleolar protein at 60B, isoform A [Drosophila melanogaster]	14	508	0.717	0.534942	-0.479955	0.271693
NP_572988.1	pdgy	pudgy, isoform A [Drosophila melanogaster]	22	597	1.198	0.538066	0.260628	0.269164
NP_652000.1	Ef1gamma	Ef1gamma, isoform A [Drosophila melanogaster]	31	431	1.391	0.541218	0.476122	0.266627
NP_523737.1	mRpS16	mitochondrial ribosomal protein S16 [Drosophila melanogaster]	4	129	0.365	0.543364	-1.45403	0.264909
NP_727374.1	Idgf4	imaginal disc growth factor 4, isoform B [Drosophila melanogaster]	26	442	1.582	0.54581	0.66175	0.262958
NP_609183.1	CG12375	uncharacterized protein Dmel_CG12375 [Drosophila melanogaster]	9	292	1.131	0.548619	0.177599	0.260729
NP_001036391.2	RpL5	ribosomal protein L5, isoform H [Drosophila melanogaster]	17	299	0.811	0.549386	-0.302226	0.260122
NP_652101.2	CG17508	uncharacterized protein Dmel_CG17508, isoform A [Drosophila melanogaster]	2	321	0.897	0.553844	-0.15682	0.256613
NP_724345.1	His3:CG31613	histone H3 [Drosophila melanogaster]	2	136	0.536	0.557263	-0.899695	0.25394
NP_001261879.1	Eip71CD	Ecdysone-induced protein 28/29kD, isoform G [Drosophila melanogaster]	3	261	1.157	0.558912	0.210389	0.252657
NP_477098.1	Rho1	Rho1, isoform A [Drosophila melanogaster]	13	192	1.19	0.560703	0.250962	0.251267
NP_001285984.1	Cyt-c-p	cytochrome c proximal, isoform B [Drosophila melanogaster]	14	108	0.817	0.561093	-0.291592	0.250966
NP_650720.1	Vha100-4	vacuolar H[+] ATPase 100kD subunit 4 [Drosophila melanogaster]	4	844	0.648	0.570526	-0.625934	0.243724
NP_788764.1	Tpi	triose phosphate isomerase, isoform A [Drosophila melanogaster]	18	348	0.769	0.57068	-0.378944	0.243607
NP_524742.1	mRpL12	mitochondrial ribosomal protein L12 [Drosophila melanogaster]	13	182	0.509	0.571001	-0.974262	0.243363
NP_648286.1	CG4942	CG4942 [Drosophila melanogaster]	1	351	0.791	0.571415	-0.33825	0.243048
NP_001285253.1	CG9512	CG9512, isoform B [Drosophila melanogaster]	22	623	0.733	0.573189	-0.448115	0.241702
NP_609847.1	CG6412	CG6412 [Drosophila melanogaster]	8	318	0.839	0.573622	-0.253257	0.241374
NP_650366.1	HtrA2	HTRA2-related serine protease, isoform A [Drosophila melanogaster]	5	422	1.094	0.576476	0.129613	0.239218
NP_650580.1	CG3678	CG3678, isoform A [Drosophila melanogaster]	8	282	0.502	0.57694	-0.994241	0.238869
NP_477380.1	Fpps	farnesyl pyrophosphate synthase [Drosophila melanogaster]	4	419	0.691	0.577104	-0.533242	0.238746
NP_648514.1	RpL10Ab	ribosomal protein L10Ab, isoform A [Drosophila melanogaster]	13	217	0.862	0.57821	-0.21424	0.237914
NP_650645.1	alt	aluminum tubes, isoform G [Drosophila melanogaster]	2	874	1.557	0.578994	0.638769	0.237326
NP_611175.1	ste24a	prenyl protease type I [Drosophila melanogaster]	6	451	0.687	0.579301	-0.541618	0.237096
NP_001303387.1	Nplp2	Neuropeptide-like precursor 2, isoform C [Drosophila melanogaster]	9	119	0.678	0.579766	-0.560643	0.236748
NP_476929.1	Nmdmc	NAD-dependent methylenetetrahydrofolate dehydrogenase, isoform B [Drosophila melanogaster]	11	309	1.077	0.583627	0.107018	0.233865
NP_733366.2	aralar1	aralar1, isoform B [Drosophila melanogaster]	1	679	1.292	0.584662	0.369606	0.233095
NP_650064.1	CG5214	CG5214 [Drosophila melanogaster]	16	468	1.3	0.586756	0.378512	0.231542
NP_727689.1	Jafrac1	thioredoxin peroxidase 1, isoform B [Drosophila melanogaster]	11	194	0.869	0.58736	-0.202572	0.231095
NP_524002.1	RpS17	ribosomal protein S17 [Drosophila melanogaster]	7	131	1.364	0.587519	0.447844	0.230978
NP_729528.2	CG6767	CG6767, isoform B [Drosophila melanogaster]	4	388	1.338	0.587584	0.420078	0.23093
NP_648426.1	CG6321	CG6321 [Drosophila melanogaster]	1	418	1.502	0.589116	0.586885	0.229799
NP_523849.3	Nurf-38	nucleosome remodeling factor - 38kD, isoform A [Drosophila melanogaster]	2	338	0.849	0.590427	-0.236164	0.228834
NP_001285193.1	CG2453	CG2453, isoform B [Drosophila melanogaster]	2	301	0.833	0.598009	-0.263612	0.223292
NP_001188678.1	Rab35	Rab35, isoform B [Drosophila melanogaster]	13	201	1.128	0.599198	0.173767	0.22243
NP_649239.1	CG5059	CG5059, isoform A [Drosophila melanogaster]	7	201	0.789	0.604981	-0.341903	0.218258
NP_651896.1	CG2118	CG2118, isoform A [Drosophila melanogaster]	26	698	0.846	0.60591	-0.24127	0.217592
NP_995900.1	par-1	par-1, isoform A [Drosophila melanogaster]	3	938	1.492	0.607045	0.577248	0.216779
NP_650894.1	CG10877	uncharacterized protein Dmel_CG10877 [Drosophila melanogaster]	6	441	0.837	0.610733	-0.2567	0.214149
NP_524744.2	Rab18	Rab18 [Drosophila melanogaster]	2	197	0.84	0.612268	-0.251539	0.213058
NP_609617.1	CG5705	CG5705 [Drosophila melanogaster]	6	392	0.833	0.612573	-0.263612	0.212842
NP_727931.1	Nipsnap	nipsnap, isoform A [Drosophila melanogaster]	9	273	0.71	0.612656	-0.494109	0.212783
NP_652658.1	mRpL36	mitochondrial ribosomal protein L36 [Drosophila melanogaster]	1	128	0.75	0.613001	-0.415037	0.212539
NP_001027219.1	GlyP	glycogen phosphorylase, isoform B [Drosophila melanogaster]	46	844	1.399	0.614467	0.484396	0.211501
NP_477369.1	TER94	TER94, isoform A [Drosophila melanogaster]	2	801	1.501	0.61465	0.585924	0.211372
NP_001262811.1	CASK	CASK, isoform H [Drosophila melanogaster]	13	929	1.235	0.616573	0.304511	0.210015
NP_001027180.1	fabp	fatty acid binding protein, isoform B [Drosophila melanogaster]	18	130	0.776	0.61707	-0.365871	0.209665
NP_001260335.1	CG33303	uncharacterized protein Dmel_CG33303, isoform B [Drosophila melanogaster]	19	458	1.123	0.618306	0.167358	0.208797
NP_725696.1	Rab4	Rab4, isoform A [Drosophila melanogaster]	4	213	0.84	0.619251	-0.251539	0.208133
NP_001162940.3	Fatp	fatty acid (long chain) transport protein, isoform F [Drosophila melanogaster]	28	746	1.284	0.619277	0.360645	0.208115
NP_001163278.2	Pde8	phosphodiesterase 8, isoform N [Drosophila melanogaster]	2	949	1.488	0.619925	0.573375	0.207661
NP_611385.1	Jheh1	juvenile hormone epoxide hydrolase 1 [Drosophila melanogaster]	10	474	0.702	0.620553	-0.510457	0.207221
NP_477378.1	Thiolase	thiolase [Drosophila melanogaster]	30	469	0.889	0.623288	-0.169745	0.205311
NP_722724.1	Eno	enolase, isoform E [Drosophila melanogaster]	35	500	0.887	0.624031	-0.172994	0.204794
NP_001096849.1	CG32000	uncharacterized protein Dmel_CG32000, isoform H [Drosophila melanogaster]	6	1451	1.335	0.627604	0.41684	0.202314
NP_573376.2	CG8034	CG8034, isoform A [Drosophila melanogaster]	3	647	1.452	0.634011	0.538041	0.197903
NP_731927.1	His4r	histone H4 replacement, isoform A [Drosophila melanogaster]	10	103	0.334	0.635912	-1.58208	0.196603
NP_727383.1	CG32694	uncharacterized protein Dmel_CG32694, isoform B [Drosophila melanogaster]	3	364	1.872	0.635915	0.90458	0.196601
NP_648235.1	se	sepia [Drosophila melanogaster]	7	243	0.626	0.640767	-0.675765	0.1933
NP_001260465.1	UK114	UK114, isoform B [Drosophila melanogaster]	11	138	0.6	0.642189	-0.736966	0.192337
NP_608616.2	CG31937	uncharacterized protein Dmel_CG31937 [Drosophila melanogaster]	5	321	1.107	0.642583	0.146655	0.192071
NP_723771.4	Pih1D1	Pih1D1, isoform D [Drosophila melanogaster]	1	1094	0.625	0.644296	-0.678072	0.190915
NP_731527.1	Tpc1	thiamine pyrophosphate carrier protein 1, isoform B [Drosophila melanogaster]	8	332	1.214	0.644416	0.279768	0.190834
NP_996274.1	Gdh	glutamate dehydrogenase, isoform F [Drosophila melanogaster]	2	549	1.199	0.644897	0.261832	0.19051
NP_723137.1	eIF-4a	eukaryotic initiation factor 4a, isoform A [Drosophila melanogaster]	9	403	1.252	0.646509	0.324235	0.189426
NP_729388.1	GstO2	glutathione S transferase O2, isoform A [Drosophila melanogaster]	1	251	0.719	0.647102	-0.475936	0.189028
NP_727150.1	Inx2	innexin 2, isoform B [Drosophila melanogaster]	10	367	0.584	0.648068	-0.77596	0.188379
NP_649161.1	CG8004	CG8004 [Drosophila melanogaster]	2	269	0.497	0.64954	-1.00868	0.187394
NP_001246627.1	CG42540	uncharacterized protein Dmel_CG42540, isoform G [Drosophila melanogaster]	1	517	1.454	0.651262	0.540027	0.186244
NP_650523.1	CG5903	CG5903, isoform A [Drosophila melanogaster]	15	226	0.799	0.653067	-0.323733	0.185042
NP_651825.4	dj-1beta	dj-1beta [Drosophila melanogaster]	8	187	1.245	0.653798	0.316146	0.184557
NP_001097746.1	cu	curled, isoform D [Drosophila melanogaster]	6	642	0.91	0.653995	-0.136062	0.184425
NP_001287641.1	Tim17b	translocase of the inner mitochondrial membrane 17b, isoform B [Drosophila melanogaster]	9	173	1.197	0.65582	0.259423	0.183215
NP_523526.1	Trx-2	thioredoxin-2, isoform A [Drosophila melanogaster]	7	106	0.655	0.658384	-0.610433	0.181521
NP_610487.3	prel	preli-like, isoform B [Drosophila melanogaster]	3	236	0.808	0.658663	-0.307573	0.181337
NP_649888.1	CG8132	CG8132 [Drosophila melanogaster]	9	283	0.912	0.659835	-0.132894	0.180565
NP_724654.1	CG30373	uncharacterized protein Dmel_CG30373, isoform A [Drosophila melanogaster]	5	158	0.703	0.660361	-0.508403	0.180218
NP_612094.2	CG9149	CG9149 [Drosophila melanogaster]	10	392	1.368	0.661041	0.452068	0.179772
NP_523870.2	mRpL17	mitochondrial ribosomal protein L17, isoform A [Drosophila melanogaster]	6	176	0.775	0.661604	-0.367732	0.179402
NP_001189286.1	CG11089	uncharacterized protein Dmel_CG11089, isoform B [Drosophila melanogaster]	29	590	1.195	0.661634	0.257011	0.179382
NP_649052.1	Cyp12c1	Cyp12c1, isoform A [Drosophila melanogaster]	11	524	0.763	0.662009	-0.390245	0.179136
NP_650048.1	Tctp	translationally controlled tumor protein, isoform A [Drosophila melanogaster]	8	172	0.668	0.662279	-0.58208	0.178959
NP_648665.1	CG8745	CG8745 [Drosophila melanogaster]	2	494	0.799	0.66485	-0.323733	0.177276
NP_609494.1	RfC38	replication factor C 38kD subunit, isoform A [Drosophila melanogaster]	1	356	0.741	0.665596	-0.432455	0.176789
NP_001263106.1	Fer2LCH	ferritin 2 light chain homologue, isoform E [Drosophila melanogaster]	19	236	0.771	0.666667	-0.375197	0.176091
NP_523889.1	mRpL23	mitochondrial ribosomal protein L23, isoform A [Drosophila melanogaster]	4	150	0.437	0.667777	-1.19429	0.175369
NP_651072.1	mRpL45	mitochondrial ribosomal protein L45 [Drosophila melanogaster]	15	361	1.122	0.66906	0.166073	0.174535
NP_001246053.1	ApepP	aminopeptidase P, isoform B [Drosophila melanogaster]	11	613	0.838	0.669287	-0.254978	0.174387
NP_001027270.1	Adh	alcohol dehydrogenase, isoform E [Drosophila melanogaster]	16	256	0.711	0.671143	-0.492079	0.173185
NP_523742.2	LamC	lamin C, isoform A [Drosophila melanogaster]	44	621	1.644	0.671927	0.71721	0.172678
NP_572886.2	GstT4	glutathione S transferase T4 [Drosophila melanogaster]	10	237	0.92	0.673461	-0.120294	0.171688
NP_524981.2	mRpL33	mitochondrial ribosomal protein L33 [Drosophila melanogaster]	1	64	0.717	0.680251	-0.479955	0.167331
NP_001259608.1	CG9921	CG9921, isoform B [Drosophila melanogaster]	3	102	0.756	0.680426	-0.403542	0.167219
NP_001162804.1	AnxB10	annexin B10, isoform B [Drosophila melanogaster]	6	321	0.63	0.682801	-0.666576	0.165706
NP_001285095.1	CG1637	CG1637, isoform D [Drosophila melanogaster]	5	459	0.724	0.684211	-0.465938	0.16481
NP_524939.1	mRpL4	mitochondrial ribosomal protein L4 [Drosophila melanogaster]	9	296	1.126	0.685083	0.171207	0.164257
NP_476964.1	RpS18	ribosomal protein S18, isoform A [Drosophila melanogaster]	17	152	1.777	0.685226	0.829444	0.164166
NP_001097729.1	CG9471	CG9471, isoform B [Drosophila melanogaster]	7	204	0.67	0.68588	-0.577767	0.163752
NP_001284987.1	CG10932	uncharacterized protein Dmel_CG10932, isoform B [Drosophila melanogaster]	19	410	1.191	0.686268	0.252173	0.163506
NP_001260190.1	ninaC	neither inactivation nor afterpotential C, isoform D [Drosophila melanogaster]	1	1135	1.321	0.686434	0.40163	0.163401
NP_651770.1	CG7950	CG7950, isoform A [Drosophila melanogaster]	1	158	1.432	0.687461	0.518031	0.162752
NP_001286133.1	RpL21	ribosomal protein L21, isoform C [Drosophila melanogaster]	12	159	0.861	0.687534	-0.215915	0.162706
NP_650722.1	Vha100-2	vacuolar H[+] ATPase 100kD subunit 2, isoform B [Drosophila melanogaster]	32	834	0.884	0.690512	-0.177882	0.160829
NP_477310.2	Uba1	ubiquitin activating enzyme 1, isoform A [Drosophila melanogaster]	35	1191	1.068	0.693392	0.0949116	0.159021
NP_477445.1	Manf	mesencephalic astrocyte-derived neurotrophic factor [Drosophila melanogaster]	8	173	1.689	0.694736	0.756169	0.15818
NP_610217.1	Fmo-2	Flavin-containing monooxygenase 2 [Drosophila melanogaster]	3	429	1.416	0.696369	0.501821	0.157161
NP_524051.1	mRpL20	mitochondrial ribosomal protein L20 [Drosophila melanogaster]	6	150	0.666	0.696626	-0.586406	0.157
NP_651323.3	bai	baiser [Drosophila melanogaster]	8	206	0.623	0.698746	-0.682696	0.155681
NP_609219.1	CG17294	uncharacterized protein Dmel_CG17294 [Drosophila melanogaster]	3	255	1.406	0.701197	0.491597	0.15416
NP_724718.1	Ggamma1	G protein gamma 1, isoform A [Drosophila melanogaster]	3	70	1.594	0.701891	0.672652	0.15373
NP_523598.2	mRpL13	mitochondrial ribosomal protein L13 [Drosophila melanogaster]	4	178	0.813	0.702851	-0.298673	0.153137
NP_523836.2	Adk2	adenylate kinase 2 [Drosophila melanogaster]	28	240	0.791	0.703479	-0.33825	0.152749
NP_001259193.1	sgg	shaggy, isoform Q [Drosophila melanogaster]	2	1168	1.483	0.703674	0.568519	0.152628
NP_648512.2	CG5946	CG5946, isoform B [Drosophila melanogaster]	15	316	0.806	0.704702	-0.311148	0.151994
NP_725534.1	Got1	glutamate oxaloacetate transaminase 1, isoform B [Drosophila melanogaster]	13	437	0.766	0.705787	-0.384584	0.151326
NP_524425.2	Mvl	malvolio, isoform E [Drosophila melanogaster]	2	596	1.124	0.706431	0.168642	0.15093
NP_610306.1	CG30491	uncharacterized protein Dmel_CG30491, isoform A [Drosophila melanogaster]	7	331	0.643	0.706883	-0.637109	0.150652
NP_609790.1	CG4278	CG4278 [Drosophila melanogaster]	2	292	0.811	0.707448	-0.302226	0.150305
NP_524079.1	Pdi	protein disulfide isomerase, isoform A [Drosophila melanogaster]	54	496	0.681	0.707539	-0.554273	0.150249
NP_536784.1	clt	cricklet [Drosophila melanogaster]	9	562	0.856	0.710653	-0.224317	0.148343
NP_524444.3	Mitofilin	mitofilin, isoform C [Drosophila melanogaster]	2	739	1.139	0.711652	0.187768	0.147732
NP_648950.1	beg	bad egg [Drosophila melanogaster]	9	379	0.864	0.711725	-0.210897	0.147688
NP_610143.3	CG3262	CG3262, isoform D [Drosophila melanogaster]	5	293	1.199	0.712503	0.261832	0.147213
NP_001033891.1	RpL13	ribosomal protein L13, isoform B [Drosophila melanogaster]	27	218	1.162	0.71274	0.21661	0.147069
NP_001162765.1	MSBP	membrane steroid binding protein, isoform B [Drosophila melanogaster]	22	248	1.064	0.713294	0.0894982	0.146731
NP_609901.5	Jwa	Jwa [Drosophila melanogaster]	2	249	0.802	0.715277	-0.318326	0.145526
NP_608487.1	galectin	galectin, isoform A [Drosophila melanogaster]	1	503	0.782	0.717409	-0.354759	0.144233
NP_610609.1	CG12935	uncharacterized protein Dmel_CG12935, isoform A [Drosophila melanogaster]	5	231	0.779	0.717925	-0.360305	0.143921
NP_611892.2	DnaJ-60	DnaJ-like-60, isoform C [Drosophila melanogaster]	5	217	0.783	0.720238	-0.352916	0.142524
NP_001245762.1	Cdc42	Cdc42, isoform C [Drosophila melanogaster]	10	191	1.164	0.720249	0.219091	0.142517
NP_610313.1	mRpL52	mitochondrial ribosomal protein L52 [Drosophila melanogaster]	5	126	0.432	0.720454	-1.2109	0.142394
NP_732093.1	Sap47	Synapse-associated protein 47kD, isoform G [Drosophila melanogaster]	5	535	1.299	0.721672	0.377401	0.14166
NP_723090.1	Hel25E	helicase at 25E, isoform B [Drosophila melanogaster]	7	424	1.155	0.7222	0.207893	0.141343
NP_573179.1	CG4928	CG4928, isoform B [Drosophila melanogaster]	9	538	1.274	0.726852	0.349365	0.138554
NP_647873.2	Cpr64Ab	cuticular protein 64Ab [Drosophila melanogaster]	5	120	1.349	0.731201	0.43189	0.135963
NP_001014528.1	CG33506	uncharacterized protein Dmel_CG33506 [Drosophila melanogaster]	8	320	1.156	0.73123	0.209141	0.135946
NP_610707.2	Twdlbeta	tweedlebeta [Drosophila melanogaster]	2	198	0.818	0.736133	-0.289827	0.133044
NP_524316.1	RpL3	ribosomal protein L3, isoform A [Drosophila melanogaster]	31	416	0.866	0.736388	-0.207561	0.132893
NP_524450.2	T-cp1	Tcp1-like, isoform A [Drosophila melanogaster]	20	557	1.284	0.737736	0.360645	0.132099
NP_001027262.1	DNApol-gamma35	DNA polymerase gamma 35kD [Drosophila melanogaster]	1	361	1.205	0.738215	0.269033	0.131817
NP_648572.1	Ncc69	sodium chloride cotransporter 69, isoform A [Drosophila melanogaster]	1	1171	1.446	0.739987	0.532068	0.130776
NP_476832.1	SERCA	Sarco/endoplasmic reticulum Ca(2+)-ATPase, isoform A [Drosophila melanogaster]	4	1002	1.281	0.741007	0.35727	0.130178
NP_476570.1	Gs1	glutamine synthetase 1, isoform B [Drosophila melanogaster]	18	399	1.207	0.742065	0.271426	0.129558
NP_572423.1	Ykt6	YKT6 v-SNARE [Drosophila melanogaster]	5	199	0.681	0.744416	-0.554273	0.128184
NP_523982.2	Prm	paramyosin, isoform A [Drosophila melanogaster]	41	879	0.844	0.744837	-0.244685	0.127939
NP_523433.2	slgA	sluggish A, isoform E [Drosophila melanogaster]	3	681	0.698	0.746598	-0.518701	0.126913
NP_649769.1	Gie	GTPase indispensable for equal segregation of chromosomes, isoform A [Drosophila melanogaster]	2	186	0.883	0.746665	-0.179515	0.126874
NP_732662.2	CASK	CASK, isoform G [Drosophila melanogaster]	1	609	1.236	0.747506	0.305679	0.126385
NP_001285513.1	CG34120	uncharacterized protein Dmel_CG34120, isoform E [Drosophila melanogaster]	21	1998	1.175	0.748785	0.232661	0.125643
NP_001260303.1	RpS2	ribosomal protein S2, isoform B [Drosophila melanogaster]	16	267	1.208	0.755042	0.27262	0.122029
NP_651967.2	COQ7	COQ7 [Drosophila melanogaster]	5	219	0.827	0.75576	-0.274041	0.121616
NP_001014525.1	Vmat	vesicular monoamine transporter, isoform D [Drosophila melanogaster]	2	646	1.325	0.757343	0.405992	0.120708
NP_001285297.1	mRpS30	mitochondrial ribosomal protein S30, isoform B [Drosophila melanogaster]	33	557	1.215	0.757843	0.280956	0.120421
NP_648149.1	CG12262	uncharacterized protein Dmel_CG12262 [Drosophila melanogaster]	34	419	0.886	0.758293	-0.174621	0.120163
NP_523813.1	RpL23	ribosomal protein L23 [Drosophila melanogaster]	13	140	0.948	0.758326	-0.077041	0.120144
NP_788520.2	Nc73EF	neural conserved at 73EF, isoform H [Drosophila melanogaster]	4	1017	1.16	0.759983	0.214125	0.119196
NP_995838.1	CG7639	CG7639 [Drosophila melanogaster]	21	443	0.855	0.760152	-0.226004	0.1191
NP_612021.1	Tudor-SN	tudor staphylococcal nuclease, isoform A [Drosophila melanogaster]	47	926	1.074	0.760561	0.102994	0.118866
NP_648302.2	CG4447	CG4447 [Drosophila melanogaster]	7	254	0.824	0.760982	-0.279284	0.118625
NP_647832.1	CG12006	uncharacterized protein Dmel_CG12006, isoform A [Drosophila melanogaster]	1	561	0.769	0.761306	-0.378944	0.11844
NP_731495.1	CG31373	uncharacterized protein Dmel_CG31373 [Drosophila melanogaster]	2	196	0.858	0.762048	-0.22095	0.118018
NP_650717.1	CG7675	CG7675, isoform B [Drosophila melanogaster]	15	336	1.208	0.762406	0.27262	0.117814
NP_723999.1	Mhc	myosin heavy chain, isoform C [Drosophila melanogaster]	4	1962	1.303	0.764858	0.381837	0.116419
NP_477161.1	RpL9	ribosomal protein L9, isoform A [Drosophila melanogaster]	7	190	0.741	0.764879	-0.432455	0.116407
NP_572178.1	Torsin	torsin, isoform A [Drosophila melanogaster]	9	340	1.083	0.765176	0.115033	0.116238
NP_648327.1	path	pathetic, isoform A [Drosophila melanogaster]	9	471	1.253	0.767098	0.325386	0.115149
NP_477150.1	dare	defective in the avoidance of repellents [Drosophila melanogaster]	5	466	0.829	0.767957	-0.270556	0.114663
NP_610400.1	CG14749	uncharacterized protein Dmel_CG14749 [Drosophila melanogaster]	3	677	1.326	0.768432	0.407081	0.114395
NP_611460.1	CG11208	uncharacterized protein Dmel_CG11208 [Drosophila melanogaster]	21	568	0.83	0.76888	-0.268817	0.114141
NP_001014687.3	PMCA	plasma membrane calcium ATPase, isoform N [Drosophila melanogaster]	1	1120	1.539	0.77014	0.621993	0.11343
NP_610234.3	CG3420	CG3420, isoform A [Drosophila melanogaster]	5	136	0.765	0.776225	-0.386468	0.110012
NP_524185.1	mRpL15	mitochondrial ribosomal protein L15 [Drosophila melanogaster]	15	286	1.211	0.777035	0.276199	0.109559
NP_649541.1	mRpL44	mitochondrial ribosomal protein L44 [Drosophila melanogaster]	11	321	0.826	0.780186	-0.275786	0.107802
NP_477368.1	Trn	transportin, isoform A [Drosophila melanogaster]	4	893	1.354	0.78332	0.437228	0.106061
NP_001246282.1	Sin3A	Sin3A, isoform G [Drosophila melanogaster]	1	2066	1.515	0.785307	0.599318	0.104961
NP_524182.3	Ide	insulin degrading metalloproteinase [Drosophila melanogaster]	21	990	0.927	0.785489	-0.109359	0.10486
NP_524880.2	Men	malic enzyme, isoform B [Drosophila melanogaster]	28	763	0.827	0.785864	-0.274041	0.104653
NP_001260550.2	RpL30	ribosomal protein L30, isoform E [Drosophila melanogaster]	6	111	0.844	0.786379	-0.244685	0.104368
NP_609496.1	CG6287	CG6287 [Drosophila melanogaster]	20	332	1.084	0.786604	0.116365	0.104244
NP_996253.1	AnxB9	annexin B9, isoform C [Drosophila melanogaster]	3	324	0.543	0.787447	-0.880976	0.103778
NP_001262379.1	bel	belle, isoform B [Drosophila melanogaster]	27	801	1.267	0.790302	0.341417	0.102207
NP_524479.1	Orct	organic cation transporter, isoform A [Drosophila melanogaster]	5	548	0.681	0.793789	-0.554273	0.100295
NP_001246234.1	Pfk	phosphofructokinase, isoform D [Drosophila melanogaster]	14	950	1.264	0.794364	0.337996	0.0999804
NP_001036360.1	CG31731	uncharacterized protein Dmel_CG31731, isoform B [Drosophila melanogaster]	9	1597	1.267	0.795989	0.341417	0.099093
NP_652065.1	CG5707	CG5707, isoform A [Drosophila melanogaster]	7	357	0.786	0.796599	-0.347399	0.0987601
NP_649908.1	CG9393	CG9393, isoform A [Drosophila melanogaster]	9	327	0.832	0.796684	-0.265345	0.098714
NP_729802.1	CG32103	uncharacterized protein Dmel_CG32103, isoform B [Drosophila melanogaster]	10	583	0.807	0.797924	-0.309359	0.0980382
NP_610818.1	mRpL18	mitochondrial ribosomal protein L18 [Drosophila melanogaster]	8	186	1.37	0.798274	0.454176	0.0978481
NP_610504.4	CG1827	CG1827 [Drosophila melanogaster]	4	393	1.457	0.801182	0.543001	0.0962687
NP_523990.1	Dhpr	dihydropteridine reductase, isoform A [Drosophila melanogaster]	5	235	1.134	0.803308	0.181421	0.0951177
NP_001285801.1	nmd	no mitochondrial derivative, isoform C [Drosophila melanogaster]	18	369	1.087	0.803566	0.120352	0.0949787
NP_524363.3	mRpL9	mitochondrial ribosomal protein L9 [Drosophila melanogaster]	11	248	1.116	0.803959	0.158337	0.0947659
NP_001259956.1	Pgk	phosphoglycerate kinase, isoform B [Drosophila melanogaster]	23	415	0.881	0.804883	-0.182786	0.094267
NP_611840.1	CG5569	CG5569 [Drosophila melanogaster]	7	196	0.728	0.804884	-0.45799	0.0942666
NP_726504.2	emp	epithelial membrane protein, isoform B [Drosophila melanogaster]	16	551	1.2	0.805275	0.263034	0.0940557
NP_001034042.1	GstD1	glutathione S transferase D1, isoform B [Drosophila melanogaster]	8	209	0.675	0.806222	-0.567041	0.0935455
NP_995932.1	l(2)tid	lethal (2) tumorous imaginal discs, isoform B [Drosophila melanogaster]	1	520	1.309	0.807077	0.388465	0.0930848
NP_477439.2	Trap1	Trap1, isoform A [Drosophila melanogaster]	32	691	0.856	0.807209	-0.224317	0.0930141
NP_525073.1	mRpL30	mitochondrial ribosomal protein L30 [Drosophila melanogaster]	16	180	1.193	0.808629	0.254594	0.0922506
NP_001036756.2	CG34150	uncharacterized protein Dmel_CG34150 [Drosophila melanogaster]	3	137	0.668	0.809111	-0.58208	0.0919918
NP_732309.1	14-3-3epsilon	14-3-3epsilon, isoform A [Drosophila melanogaster]	12	262	0.588	0.809141	-0.766112	0.0919759
NP_649021.1	CG5506	CG5506 [Drosophila melanogaster]	9	180	0.843	0.809959	-0.246395	0.091537
NP_650443.2	l(3)neo43	lethal (3) neo43, isoform B [Drosophila melanogaster]	2	81	0.647	0.810754	-0.628162	0.0911112
NP_524823.1	spin	spinster, isoform D [Drosophila melanogaster]	1	630	1.219	0.811	0.285698	0.0909794
NP_648605.1	CG10960	uncharacterized protein Dmel_CG10960, isoform B [Drosophila melanogaster]	8	539	1.076	0.811482	0.105678	0.0907214
NP_611022.2	mRpL41	mitochondrial ribosomal protein L41 [Drosophila melanogaster]	6	166	1.325	0.813542	0.405992	0.08962
NP_524808.3	Ef1beta	elongation factor 1 beta, isoform B [Drosophila melanogaster]	11	222	0.559	0.816332	-0.83908	0.0881333
NP_523886.1	RpL23A	ribosomal protein L23A [Drosophila melanogaster]	25	277	1.372	0.816447	0.45628	0.0880722
NP_511152.2	mRpL38	mitochondrial ribosomal protein L38 [Drosophila melanogaster]	20	416	1.26	0.81762	0.333424	0.0874486
NP_609490.1	CG6230	CG6230 [Drosophila melanogaster]	24	1225	1.07	0.820771	0.0976108	0.0857781
NP_001285625.1	CG14022	uncharacterized protein Dmel_CG14022, isoform B [Drosophila melanogaster]	3	101	0.828	0.821576	-0.272297	0.0853523
NP_652013.1	cathD	cathD, isoform A [Drosophila melanogaster]	11	392	0.847	0.821975	-0.239566	0.0851411
NP_001259186.1	mRpL14	mitochondrial ribosomal protein L14, isoform B [Drosophila melanogaster]	6	161	1.093	0.827083	0.128293	0.082451
NP_001137933.1	CG7394	CG7394, isoform B [Drosophila melanogaster]	5	128	0.838	0.827558	-0.254978	0.0822015
NP_650835.1	CG11447	uncharacterized protein Dmel_CG11447 [Drosophila melanogaster]	3	250	1.172	0.827894	0.228973	0.0820254
NP_001246681.1	Prm	paramyosin, isoform E [Drosophila melanogaster]	1	307	1.379	0.828835	0.463622	0.0815317
NP_524328.1	Prosalpha2	proteasome alpha2 subunit [Drosophila melanogaster]	1	234	1.096	0.829445	0.132248	0.0812126
NP_649989.1	CG3999	CG3999, isoform A [Drosophila melanogaster]	17	985	0.875	0.830506	-0.192645	0.0806573
NP_001036410.1	CG17715	uncharacterized protein Dmel_CG17715, isoform D [Drosophila melanogaster]	3	274	0.824	0.830556	-0.279284	0.0806312
NP_001260099.1	cl	clot, isoform C [Drosophila melanogaster]	12	126	1.236	0.831106	0.305679	0.0803436
NP_725068.1	Tret1-1	trehalose transporter 1-1, isoform B [Drosophila melanogaster]	1	489	0.88	0.831745	-0.184425	0.08001
NP_610183.1	CG7791	CG7791 [Drosophila melanogaster]	9	699	1.077	0.831885	0.107018	0.0799365
NP_572663.1	CG1582	CG1582, isoform A [Drosophila melanogaster]	3	1288	1.186	0.831921	0.246104	0.0799177
NP_001014475.1	nrv2	nervana 2, isoform F [Drosophila melanogaster]	3	323	1.153	0.835486	0.205393	0.078061
NP_648182.1	CG7979	CG7979 [Drosophila melanogaster]	4	441	1.149	0.835565	0.200379	0.0780197
NP_001260818.1	CG8080	CG8080, isoform E [Drosophila melanogaster]	7	413	1.12	0.835751	0.163499	0.0779229
NP_611857.3	CG16787	uncharacterized protein Dmel_CG16787 [Drosophila melanogaster]	6	253	0.801	0.838271	-0.320126	0.0766155
NP_476886.1	Arl2	ADP ribosylation factor-like 2 [Drosophila melanogaster]	1	184	0.681	0.84129	-0.554273	0.075054
NP_523905.2	Scsalpha	succinyl coenzyme A synthetase alpha subunit, isoform A [Drosophila melanogaster]	18	328	1.2	0.842599	0.263034	0.0743789
NP_001285541.1	CG13865	uncharacterized protein Dmel_CG13865, isoform C [Drosophila melanogaster]	11	266	1.358	0.845612	0.441483	0.0728289
NP_001138112.1	CG42235	uncharacterized protein Dmel_CG42235, isoform A [Drosophila melanogaster]	2	695	1.468	0.845977	0.553852	0.0726415
NP_610806.2	ZnT49B	zinc transporter 49B, isoform A [Drosophila melanogaster]	16	655	0.889	0.856427	-0.169745	0.0673097
NP_524318.1	mRpL40	mitochondrial ribosomal protein L40 [Drosophila melanogaster]	8	196	0.808	0.857948	-0.307573	0.066539
NP_524151.2	Ugt	UDP-glucose-glycoprotein glucosyltransferase [Drosophila melanogaster]	43	1548	0.861	0.862038	-0.215915	0.0644735
NP_001138000.1	CG33170	uncharacterized protein Dmel_CG33170, isoform B [Drosophila melanogaster]	5	71	0.826	0.862346	-0.275786	0.0643185
NP_727119.1	RpL17	ribosomal protein L17, isoform B [Drosophila melanogaster]	16	186	1.133	0.863063	0.180148	0.0639573
NP_523774.1	RpL18A	ribosomal protein L18A [Drosophila melanogaster]	14	177	0.893	0.86511	-0.163268	0.0629286
NP_001246525.1	Mtch	mitochondrial carrier homolog 1, isoform E [Drosophila melanogaster]	10	316	0.902	0.865535	-0.148801	0.0627155
NP_524075.2	mRpL39	mitochondrial ribosomal protein L39 [Drosophila melanogaster]	15	333	1.106	0.866398	0.145351	0.0622826
NP_651601.1	Gp93	glycoprotein 93 [Drosophila melanogaster]	69	787	0.814	0.866765	-0.296899	0.0620988
NP_001097432.1	CG34424	uncharacterized protein Dmel_CG34424, isoform A [Drosophila melanogaster]	4	201	1.116	0.867314	0.158337	0.0618236
NP_476901.1	brn	brainiac [Drosophila melanogaster]	1	325	1.541	0.869126	0.623867	0.0609174
NP_572662.1	CG1637	CG1637, isoform C [Drosophila melanogaster]	6	450	0.767	0.870036	-0.382702	0.0604629
NP_573257.1	CG7772	CG7772 [Drosophila melanogaster]	2	164	0.713	0.87016	-0.488026	0.0604009
NP_001246837.1	Rab8	Rab8, isoform C [Drosophila melanogaster]	6	207	0.831	0.870675	-0.26708	0.0601438
NP_788551.1	isoQC	iso glutaminyl cyclase, isoform A [Drosophila melanogaster]	4	352	1.258	0.871972	0.331132	0.0594972
NP_727314.1	His3.3B	histone H3.3B, isoform B [Drosophila melanogaster]	2	136	0.719	0.872429	-0.475936	0.0592699
NP_001027038.3	trol	terribly reduced optic lobes, isoform AT [Drosophila melanogaster]	86	4479	1.066	0.87396	0.0922074	0.0585085
NP_523792.2	FK506-bp2	FK506-binding protein 2 [Drosophila melanogaster]	8	108	1.355	0.874327	0.438293	0.0583263
NP_725343.1	mRpL53	mitochondrial ribosomal protein L53 [Drosophila melanogaster]	9	155	1.091	0.874594	0.125651	0.0581936
NP_524758.1	Surf1	surfeit 1 [Drosophila melanogaster]	6	300	0.887	0.874987	-0.172994	0.0579982
NP_572436.1	CG2254	CG2254 [Drosophila melanogaster]	11	320	0.953	0.875277	-0.0694519	0.0578543
NP_001246804.1	CG9674	CG9674, isoform F [Drosophila melanogaster]	65	2115	1.054	0.875334	0.0758749	0.0578261
NP_001015389.1	Scp1	sarcoplasmic calcium-binding protein 1, isoform A [Drosophila melanogaster]	21	189	0.661	0.877665	-0.597278	0.0566714
NP_611826.1	CG5532	CG5532, isoform A [Drosophila melanogaster]	2	112	0.825	0.877726	-0.277534	0.0566412
NP_652307.1	CG12848	uncharacterized protein Dmel_CG12848, isoform A [Drosophila melanogaster]	3	120	0.784	0.878164	-0.351074	0.0564246
NP_001285254.1	CG9509	CG9509, isoform B [Drosophila melanogaster]	28	646	0.878	0.8787	-0.187707	0.0561595
NP_001033939.2	Sod3	superoxide dismutase 3, isoform E [Drosophila melanogaster]	7	243	0.831	0.879763	-0.26708	0.0556342
NP_726675.3	svr	silver, isoform H [Drosophila melanogaster]	3	1437	0.811	0.880121	-0.302226	0.0554578
NP_569856.2	CG5254	CG5254, isoform A [Drosophila melanogaster]	10	306	0.893	0.880481	-0.163268	0.05528
NP_995666.1	CG33298	uncharacterized protein Dmel_CG33298, isoform B [Drosophila melanogaster]	1	1517	1.174	0.881499	0.231432	0.0547784
NP_524870.1	fbl	fumble, isoform E [Drosophila melanogaster]	2	512	1.128	0.883525	0.173767	0.0537812
NP_610310.2	CG2064	CG2064 [Drosophila melanogaster]	18	330	0.844	0.884715	-0.244685	0.0531965
NP_725084.2	ERp60	ERp60 [Drosophila melanogaster]	50	489	1.273	0.886486	0.348232	0.0523281
NP_573357.1	Mec2	Mec2 [Drosophila melanogaster]	13	350	0.9	0.887177	-0.152003	0.0519899
NP_001286794.1	kcc	kazachoc, isoform F [Drosophila melanogaster]	2	1066	1.272	0.890513	0.347099	0.05036
NP_651456.1	Dak1	Dak1 [Drosophila melanogaster]	13	253	1.105	0.891898	0.144046	0.0496847
NP_001284928.1	sqh	spaghetti squash, isoform B [Drosophila melanogaster]	3	174	0.742	0.89274	-0.430509	0.0492748
NP_001262819.1	Mitofilin	mitofilin, isoform E [Drosophila melanogaster]	2	746	1.179	0.892905	0.237564	0.0491945
NP_523663.1	Pgi	phosphoglucose isomerase, isoform A [Drosophila melanogaster]	19	558	0.783	0.893375	-0.352916	0.0489663
NP_650891.1	att-ORFA	alternative testis transcripts open reading frame A, isoform A [Drosophila melanogaster]	6	365	0.848	0.894021	-0.237864	0.0486521
NP_573331.1	CG7280	CG7280 [Drosophila melanogaster]	10	573	1.125	0.894349	0.169925	0.0484932
NP_477034.1	tsr	twinstar [Drosophila melanogaster]	13	148	0.859	0.895222	-0.21927	0.0480695
NP_732258.1	alt	aluminum tubes, isoform E [Drosophila melanogaster]	3	842	1.319	0.897337	0.399445	0.0470443
NP_610934.1	CG18327	uncharacterized protein Dmel_CG18327, isoform A [Drosophila melanogaster]	3	304	1.209	0.897942	0.273814	0.0467518
NP_525108.2	Gapdh1	glyceraldehyde 3 phosphate dehydrogenase 1, isoform A [Drosophila melanogaster]	9	332	1.198	0.898052	0.260628	0.0466986
NP_610953.1	CG8613	CG8613 [Drosophila melanogaster]	8	808	0.921	0.898099	-0.118727	0.0466758
NP_001262907.1	Orct2	organic cation transporter 2, isoform B [Drosophila melanogaster]	2	567	0.772	0.900312	-0.373327	0.0456071
NP_524100.1	mRpS31	mitochondrial ribosomal protein S31 [Drosophila melanogaster]	15	376	0.805	0.901186	-0.312939	0.0451854
NP_001287563.1	tau	tau, isoform F [Drosophila melanogaster]	1	403	1.31	0.901912	0.389567	0.0448359
NP_995931.1	l(2)tid	lethal (2) tumorous imaginal discs, isoform C [Drosophila melanogaster]	2	507	0.83	0.902976	-0.268817	0.0443238
NP_001285360.1	RpS5a	ribosomal protein S5a, isoform B [Drosophila melanogaster]	1	228	1.304	0.904868	0.382944	0.0434145
NP_524606.1	mRpL32	mitochondrial ribosomal protein L32 [Drosophila melanogaster]	5	195	1.169	0.904992	0.225275	0.0433554
NP_650957.1	CG3337	CG3337, isoform A [Drosophila melanogaster]	3	204	0.833	0.905035	-0.263612	0.0433348
NP_610805.1	CG8778	CG8778 [Drosophila melanogaster]	17	299	0.962	0.905154	-0.0558912	0.0432775
NP_001261143.1	asrij	asrij, isoform B [Drosophila melanogaster]	10	258	1.188	0.905319	0.248535	0.0431984
NP_651776.2	CG1983	CG1983, isoform A [Drosophila melanogaster]	4	254	0.938	0.905671	-0.0923402	0.0430297
NP_525081.1	Hexo2	hexosaminidase 2 [Drosophila melanogaster]	16	622	1.074	0.907103	0.102994	0.0423436
NP_724342.1	His2B:CG17949	histone H2B [Drosophila melanogaster]	11	123	0.746	0.907558	-0.422752	0.0421254
NP_651274.1	atl	atlastin, isoform A [Drosophila melanogaster]	18	541	0.889	0.908456	-0.169745	0.0416963
NP_001137776.1	Rrp1	recombination repair protein 1, isoform B [Drosophila melanogaster]	27	706	1.215	0.910228	0.280956	0.0408498
NP_649095.2	mRpL21	mitochondrial ribosomal protein L21, isoform A [Drosophila melanogaster]	2	201	1.046	0.911732	0.0648829	0.0401326
NP_725374.1	SelD	Selenide,water dikinase, isoform A [Drosophila melanogaster]	8	398	1.108	0.913413	0.147958	0.039333
NP_477134.1	RpL22	ribosomal protein L22 [Drosophila melanogaster]	24	299	1.306	0.913715	0.385155	0.0391893
NP_001259082.1	CaMKII	Calcium/calmodulin-dependent protein kinase II, isoform K [Drosophila melanogaster]	1	482	1.544	0.916409	0.626673	0.0379107
NP_995991.1	CG12006	uncharacterized protein Dmel_CG12006, isoform B [Drosophila melanogaster]	1	531	1.136	0.917146	0.183963	0.0375617
NP_649130.2	CG14100	uncharacterized protein Dmel_CG14100 [Drosophila melanogaster]	8	407	0.793	0.91736	-0.334607	0.0374601
NP_610886.2	Roe1	Roe1 [Drosophila melanogaster]	16	213	0.888	0.917724	-0.171368	0.0372878
NP_524183.2	Las	lipoic acid synthase [Drosophila melanogaster]	4	377	1.121	0.917763	0.164786	0.0372695
NP_001245961.1	porin	porin, isoform D [Drosophila melanogaster]	41	282	0.888	0.918626	-0.171368	0.0368611
NP_649252.1	Pex16	peroxin 16 [Drosophila melanogaster]	5	341	0.916	0.919897	-0.12658	0.0362606
NP_649472.1	CG9804	CG9804, isoform A [Drosophila melanogaster]	2	234	1.177	0.921388	0.235114	0.0355575
NP_609566.1	CG6388	CG6388 [Drosophila melanogaster]	3	578	0.862	0.92183	-0.21424	0.035349
NP_648111.1	Sec63	secretory 63 [Drosophila melanogaster]	16	753	1.052	0.922455	0.0731347	0.0350549
NP_724594.1	CG30493	uncharacterized protein Dmel_CG30493 [Drosophila melanogaster]	10	326	1.173	0.923684	0.230203	0.0344767
NP_726543.1	CG2316	CG2316, isoform C [Drosophila melanogaster]	19	730	0.848	0.923772	-0.237864	0.0344354
NP_611352.1	Eip55E	Eip55E, isoform A [Drosophila melanogaster]	10	393	1.102	0.925313	0.140124	0.0337114
NP_726501.1	CG3760	CG3760, isoform A [Drosophila melanogaster]	1	271	1.319	0.926956	0.399445	0.0329407
NP_651873.3	CG1635	CG1635 [Drosophila melanogaster]	9	448	1.144	0.927584	0.194087	0.0326468
NP_724889.2	14-3-3zeta	14-3-3zeta, isoform G [Drosophila melanogaster]	3	248	0.718	0.928247	-0.477944	0.0323366
NP_524472.1	Rab7	Rab7, isoform A [Drosophila melanogaster]	9	207	0.826	0.929039	-0.275786	0.031966
NP_001162645.1	CG2918	CG2918, isoform B [Drosophila melanogaster]	60	923	0.847	0.92912	-0.239566	0.0319282
NP_649599.1	CG1213	CG1213, isoform A [Drosophila melanogaster]	3	491	0.809	0.930496	-0.305788	0.0312855
NP_609533.1	CG12264	uncharacterized protein Dmel_CG12264 [Drosophila melanogaster]	16	462	0.956	0.933454	-0.0649175	0.0299072
NP_001259147.1	CG14806	uncharacterized protein Dmel_CG14806, isoform B [Drosophila melanogaster]	2	176	1.206	0.933845	0.27023	0.0297253
NP_611045.1	CG8187	CG8187 [Drosophila melanogaster]	6	376	1.158	0.93392	0.211635	0.0296902
NP_523856.2	key	kenny, isoform A [Drosophila melanogaster]	1	387	1.136	0.935872	0.183963	0.0287836
NP_610499.2	CG1814	CG1814, isoform A [Drosophila melanogaster]	9	548	0.921	0.93598	-0.118727	0.0287333
NP_524306.3	mRpL37	mitochondrial ribosomal protein L37 [Drosophila melanogaster]	17	408	1.053	0.937592	0.0745054	0.0279861
NP_649602.2	ECSIT	ECSIT [Drosophila melanogaster]	12	409	1.056	0.938023	0.0786098	0.0277866
NP_648304.1	CG4461	CG4461 [Drosophila melanogaster]	4	200	1.093	0.938378	0.128293	0.027622
NP_610679.1	Tapdelta	Translocon-associated protein delta, isoform A [Drosophila melanogaster]	10	166	0.868	0.939032	-0.204233	0.0273196
NP_727016.1	RpL35	ribosomal protein L35, isoform A [Drosophila melanogaster]	6	123	0.895	0.939822	-0.16004	0.0269542
NP_001260180.1	Ndae1	Na[+]-driven anion exchanger 1, isoform G [Drosophila melanogaster]	1	1067	1.341	0.941114	0.423309	0.0263576
NP_650775.2	GatA	Glutamyl-tRNA amidotransferase, subunit A [Drosophila melanogaster]	5	508	1.217	0.941556	0.283329	0.0261537
NP_477360.2	Pcd	pterin-4a-carbinolamine dehydratase [Drosophila melanogaster]	1	192	1.11	0.942552	0.15056	0.0256949
NP_523975.1	RpL14	ribosomal protein L14 [Drosophila melanogaster]	18	166	0.916	0.943941	-0.12658	0.0250553
NP_511132.2	Hsc70-3	heat shock 70-kDa protein cognate 3, isoform B [Drosophila melanogaster]	64	656	0.873	0.944123	-0.195946	0.0249716
NP_610228.1	CG3270	CG3270 [Drosophila melanogaster]	7	440	0.894	0.944352	-0.161653	0.0248663
NP_612095.3	CG2277	CG2277, isoform A [Drosophila melanogaster]	4	534	1.165	0.945107	0.22033	0.0245192
NP_609361.1	eEF1delta	eEF1delta, isoform B [Drosophila melanogaster]	2	256	0.76	0.945232	-0.395929	0.0244615
NP_728841.2	RpL28	ribosomal protein L28, isoform G [Drosophila melanogaster]	22	144	0.913	0.947774	-0.131313	0.0232952
NP_524519.1	His2Av	histone H2A variant, isoform A [Drosophila melanogaster]	8	141	0.789	0.947942	-0.341903	0.0232181
NP_476631.1	RpL19	ribosomal protein L19, isoform A [Drosophila melanogaster]	18	203	1.116	0.948264	0.158337	0.0230707
NP_650163.2	CG4860	CG4860 [Drosophila melanogaster]	3	415	0.78	0.948448	-0.358454	0.0229864
NP_723549.1	Mulk	Multi-substrate lipid kinase [Drosophila melanogaster]	15	408	0.966	0.948928	-0.0499049	0.0227667
NP_001036690.1	CG34117	uncharacterized protein Dmel_CG34117 [Drosophila melanogaster]	2	101	0.799	0.949301	-0.323733	0.022596
NP_001188957.1	CG44242	uncharacterized protein Dmel_CG44242, isoform B [Drosophila melanogaster]	7	80	0.863	0.949726	-0.212568	0.0224016
NP_650013.3	CG31272	uncharacterized protein Dmel_CG31272 [Drosophila melanogaster]	7	563	1.094	0.9498	0.129613	0.0223679
NP_609709.1	mTTF	mitochondrial transcription termination factor [Drosophila melanogaster]	8	410	0.785	0.9506	-0.349235	0.0220022
NP_730454.2	CG15881	uncharacterized protein Dmel_CG15881, isoform A [Drosophila melanogaster]	3	136	1.269	0.952846	0.343692	0.0209774
NP_649015.2	CG5567	CG5567 [Drosophila melanogaster]	3	330	0.925	0.952866	-0.112475	0.0209683
NP_511161.2	Top1	topoisomerase 1, isoform A [Drosophila melanogaster]	14	974	0.893	0.952923	-0.163268	0.0209423
NP_524696.2	Mgstl	microsomal glutathione S-transferase-like, isoform A [Drosophila melanogaster]	5	152	0.924	0.953271	-0.114035	0.0207835
NP_572710.1	CG11752	uncharacterized protein Dmel_CG11752 [Drosophila melanogaster]	3	109	0.829	0.953512	-0.270556	0.020674
NP_524370.2	blp	black pearl, isoform A [Drosophila melanogaster]	18	141	0.858	0.954588	-0.22095	0.0201843
NP_611739.1	CG3800	CG3800, isoform A [Drosophila melanogaster]	6	165	1.222	0.955132	0.289244	0.0199367
NP_476632.1	RpS3	ribosomal protein S3, isoform A [Drosophila melanogaster]	21	246	1.219	0.955266	0.285698	0.0198758
NP_652068.1	CG5704	CG5704, isoform A [Drosophila melanogaster]	3	335	0.925	0.956283	-0.112475	0.0194135
NP_536796.2	Rok	Rho kinase, isoform A [Drosophila melanogaster]	8	1390	1.124	0.956428	0.168642	0.0193478
NP_724888.2	14-3-3zeta	14-3-3zeta, isoform F [Drosophila melanogaster]	2	248	1.285	0.95647	0.361768	0.0193287
NP_609588.1	CG6180	CG6180 [Drosophila melanogaster]	10	257	1.052	0.957233	0.0731347	0.0189825
NP_610382.2	Mal-A5	maltase A5, isoform A [Drosophila melanogaster]	19	630	0.888	0.957408	-0.171368	0.0189028
NP_651364.1	CG11858	uncharacterized protein Dmel_CG11858 [Drosophila melanogaster]	3	130	1.23	0.957469	0.298658	0.0188751
NP_524312.1	Adk3	adenylate kinase 3, isoform A [Drosophila melanogaster]	14	216	0.935	0.958423	-0.0969617	0.0184427
NP_608991.2	CG9150	CG9150 [Drosophila melanogaster]	2	251	1.129	0.958537	0.175045	0.0183912
NP_524105.2	Pdh	photoreceptor dehydrogenase, isoform A [Drosophila melanogaster]	19	278	1.072	0.958748	0.100305	0.0182955
NP_001286259.1	Pal1	Peptidyl-alpha-hydroxyglycine-alpha-amidating lyase 1, isoform C [Drosophila melanogaster]	2	511	1.259	0.958993	0.332278	0.0181848
NP_727588.2	regucalcin	regucalcin, isoform D [Drosophila melanogaster]	22	319	1.09	0.960037	0.124328	0.0177121
NP_610524.1	Vamp7	Vesicle-associated membrane protein 7, isoform A [Drosophila melanogaster]	6	218	0.861	0.961674	-0.215915	0.016972
NP_649133.1	Lon	Lon protease, isoform A [Drosophila melanogaster]	1	1006	0.845	0.962381	-0.242977	0.016653
NP_001261768.1	sti	sticky, isoform B [Drosophila melanogaster]	5	1858	1.272	0.96245	0.347099	0.0166219
NP_477371.1	Irp-1A	iron regulatory protein 1A [Drosophila melanogaster]	5	902	1.126	0.963462	0.171207	0.0161655
NP_723536.1	eEF1delta	eEF1delta, isoform A [Drosophila melanogaster]	1	229	0.764	0.963819	-0.388355	0.0160046
NP_536791.1	l(2)37Bb	lethal (2) 37Bb [Drosophila melanogaster]	10	515	1.078	0.963842	0.108357	0.0159941
NP_608746.1	CG17221	uncharacterized protein Dmel_CG17221, isoform A [Drosophila melanogaster]	3	413	0.903	0.964424	-0.147202	0.0157319
NP_001163499.1	cpx	complexin, isoform S [Drosophila melanogaster]	5	146	1.162	0.965507	0.21661	0.0152447
NP_726217.2	CG2852	CG2852, isoform D [Drosophila melanogaster]	22	205	1.165	0.966406	0.22033	0.0148403
NP_476838.1	Cbp53E	calbindin 53E, isoform A [Drosophila melanogaster]	3	310	0.839	0.967305	-0.253257	0.0144367
NP_001285282.1	CG8128	CG8128, isoform B [Drosophila melanogaster]	6	330	1.095	0.96868	0.130931	0.0138194
NP_727094.1	RpL7A	ribosomal protein L7A, isoform A [Drosophila melanogaster]	20	271	1.112	0.96877	0.153157	0.0137794
NP_609394.1	Mdh1	malate dehydrogenase 1, isoform A [Drosophila melanogaster]	19	337	0.877	0.969056	-0.189351	0.0136512
NP_610092.2	CG9249	CG9249, isoform A [Drosophila melanogaster]	6	310	1.076	0.969785	0.105678	0.0133246
NP_524351.1	mRpL11	mitochondrial ribosomal protein L11 [Drosophila melanogaster]	7	196	1.036	0.970347	0.051024	0.0130728
NP_477169.1	nrv2	nervana 2, isoform A [Drosophila melanogaster]	1	322	1.084	0.970367	0.116365	0.013064
NP_788610.1	mRpL47	mitochondrial ribosomal protein L47 [Drosophila melanogaster]	8	271	0.937	0.970474	-0.093879	0.0130163
NP_477054.1	RpL11	ribosomal protein L11, isoform A [Drosophila melanogaster]	8	184	0.959	0.970535	-0.0603973	0.0129887
NP_524830.2	Faa	fumarylacetoacetase [Drosophila melanogaster]	5	417	1.066	0.970926	0.0922074	0.0128137
NP_001262743.1	CG4662	CG4662, isoform F [Drosophila melanogaster]	4	505	1.212	0.971553	0.27739	0.0125335
NP_649489.1	CG9769	CG9769 [Drosophila melanogaster]	3	280	1.202	0.971941	0.265437	0.0123602
NP_726686.1	RpL36	ribosomal protein L36, isoform B [Drosophila melanogaster]	9	115	1.103	0.972015	0.141433	0.0123271
NP_001261717.1	CG6084	CG6084, isoform D [Drosophila melanogaster]	1	316	1.086	0.972847	0.119024	0.0119557
NP_609970.4	CG10195	uncharacterized protein Dmel_CG10195, isoform B [Drosophila melanogaster]	2	361	1.185	0.972983	0.244887	0.0118947
NP_524180.1	alphaSnap	alpha soluble NSF attachment protein [Drosophila melanogaster]	11	292	0.82	0.973021	-0.286304	0.011878
NP_730226.3	Nc73EF	neural conserved at 73EF, isoform J [Drosophila melanogaster]	4	1105	1.167	0.973119	0.222805	0.0118342
NP_788675.1	CG9297	CG9297, isoform A [Drosophila melanogaster]	28	930	1.167	0.973657	0.222805	0.0115939
NP_649712.1	CG1227	CG1227, isoform A [Drosophila melanogaster]	4	320	1.154	0.974303	0.206643	0.011306
NP_647875.1	Cpr64Ad	cuticular protein 64Ad [Drosophila melanogaster]	10	247	1.127	0.974615	0.172488	0.011167
NP_648830.1	Mbs	myosin binding subunit, isoform E [Drosophila melanogaster]	2	377	1.492	0.975456	0.577248	0.0107922
NP_524715.2	ScpX	sterol carrier protein X-related thiolase [Drosophila melanogaster]	11	544	1.162	0.975921	0.21661	0.0105854
NP_476641.1	mle	maleless, isoform A [Drosophila melanogaster]	3	1293	0.836	0.976138	-0.258425	0.0104889
NP_476760.1	Top2	topoisomerase 2, isoform A [Drosophila melanogaster]	29	1447	1.113	0.976276	0.154454	0.0104274
NP_649527.1	CG11999	uncharacterized protein Dmel_CG11999 [Drosophila melanogaster]	9	216	1.216	0.977138	0.282143	0.010044
NP_650679.3	Prx5	peroxiredoxin 5, isoform A [Drosophila melanogaster]	14	190	0.947	0.977739	-0.0785637	0.00977722
NP_724562.2	Aldh-III	aldehyde dehydrogenase type III, isoform Q [Drosophila melanogaster]	29	564	1.048	0.977925	0.0676387	0.00969441
NP_996319.1	svr	silver, isoform G [Drosophila melanogaster]	3	1439	1.054	0.979634	0.0758749	0.00893631
NP_728963.1	CG14997	uncharacterized protein Dmel_CG14997, isoform B [Drosophila melanogaster]	16	457	1.029	0.980223	0.041243	0.00867493
NP_724916.1	JhI-1	juvenile hormone-inducible protein 1 [Drosophila melanogaster]	6	766	1.078	0.980313	0.108357	0.00863542
NP_649644.1	CG17919	uncharacterized protein Dmel_CG17919 [Drosophila melanogaster]	7	202	1.125	0.980364	0.169925	0.00861246
NP_001247375.1	Npc2g	Niemann-Pick type C-2g, isoform B [Drosophila melanogaster]	3	159	0.901	0.980421	-0.150401	0.0085876
NP_650944.3	CG5793	CG5793, isoform D [Drosophila melanogaster]	2	220	1.047	0.980482	0.0662614	0.00856045
NP_724569.1	didum	dilute class unconventional myosin, isoform C [Drosophila melanogaster]	23	1800	1.064	0.981016	0.0894982	0.00832397
NP_648277.3	CG5068	CG5068, isoform A [Drosophila melanogaster]	1	409	1.142	0.981075	0.191563	0.00829764
NP_524407.1	ninaE	neither inactivation nor afterpotential E [Drosophila melanogaster]	7	373	1.097	0.981172	0.133564	0.00825468
NP_476951.1	140up	upstream of RpII140, isoform A [Drosophila melanogaster]	8	261	0.966	0.981221	-0.0499049	0.00823313
NP_729448.1	Argk	arginine kinase, isoform C [Drosophila melanogaster]	5	396	1.18	0.981326	0.238787	0.00818672
NP_573096.1	CG8931	CG8931 [Drosophila melanogaster]	3	421	1.063	0.981443	0.0881416	0.00813485
NP_723365.1	Pvr	PDGF- and VEGF-receptor related, isoform B [Drosophila melanogaster]	1	1509	1.143	0.981918	0.192825	0.00792491
NP_001259175.1	Pgd	phosphogluconate dehydrogenase, isoform B [Drosophila melanogaster]	13	481	1.056	0.981963	0.0786098	0.00790471
NP_524726.1	RpL8	ribosomal protein L8, isoform A [Drosophila melanogaster]	18	256	1.137	0.982256	0.185232	0.00777526
NP_648664.2	CG8757	CG8757 [Drosophila melanogaster]	2	252	1.069	0.982705	0.0962619	0.00757662
NP_610945.1	CG8531	CG8531 [Drosophila melanogaster]	16	545	1.103	0.98357	0.141433	0.00719474
NP_650138.1	CG18547	uncharacterized protein Dmel_CG18547 [Drosophila melanogaster]	3	345	0.935	0.983599	-0.0969617	0.0071819
NP_724244.1	pr	purple [Drosophila melanogaster]	3	168	1.164	0.983815	0.219091	0.00708662
NP_609239.1	mRpL51	mitochondrial ribosomal protein L51 [Drosophila melanogaster]	7	174	1.074	0.983851	0.102994	0.00707065
NP_611685.1	RpS16	ribosomal protein S16, isoform A [Drosophila melanogaster]	18	148	1.124	0.983853	0.168642	0.00706985
NP_476950.1	Rac1	Rac1, isoform A [Drosophila melanogaster]	4	192	1.089	0.984305	0.123004	0.00687044
NP_524261.1	alpha-Est7	alpha-Esterase-7 [Drosophila melanogaster]	27	572	1.125	0.984459	0.169925	0.00680222
NP_001097692.1	CG1208	CG1208, isoform C [Drosophila melanogaster]	1	502	0.872	0.984656	-0.1976	0.00671564
NP_726176.1	Swim	secreted Wg-interacting molecule, isoform A [Drosophila melanogaster]	2	431	0.914	0.984848	-0.129734	0.006631
NP_610846.2	CG4627	CG4627 [Drosophila melanogaster]	2	204	1.084	0.98493	0.116365	0.0065945
NP_511138.2	Lsp1alpha	larval serum protein 1 alpha [Drosophila melanogaster]	2	816	1.245	0.985028	0.316146	0.00655131
NP_001138137.1	CG42376	uncharacterized protein Dmel_CG42376, isoform B [Drosophila melanogaster]	4	92	1.157	0.985207	0.210389	0.00647269
NP_648484.1	CG6084	CG6084, isoform A [Drosophila melanogaster]	1	316	1.097	0.985511	0.133564	0.00633836
NP_001285794.1	RpL7	ribosomal protein L7, isoform B [Drosophila melanogaster]	21	252	0.945	0.985889	-0.0816138	0.00617205
NP_523684.2	Galphao	G protein alpha o subunit, isoform A [Drosophila melanogaster]	15	354	1.103	0.985927	0.141433	0.00615506
NP_523379.2	mRpL22	mitochondrial ribosomal protein L22 [Drosophila melanogaster]	4	233	1.072	0.986276	0.100305	0.00600139
NP_572241.2	Sirt4	sirtuin 4, isoform C [Drosophila melanogaster]	2	312	0.876	0.986501	-0.190997	0.00590241
NP_649539.1	RpL35A	ribosomal protein L35A [Drosophila melanogaster]	7	157	0.929	0.986616	-0.106249	0.00585169
NP_651246.2	Dis3	Dis3, isoform A [Drosophila melanogaster]	3	982	1.14	0.986713	0.189034	0.00580914
NP_001259561.1	RpL37a	ribosomal protein L37a, isoform B [Drosophila melanogaster]	6	93	1.132	0.986719	0.178874	0.00580672
NP_001036734.1	CG17271	uncharacterized protein Dmel_CG17271, isoform B [Drosophila melanogaster]	4	270	1.229	0.987282	0.297485	0.00555866
NP_570046.1	CG3603	CG3603, isoform A [Drosophila melanogaster]	6	249	0.954	0.987531	-0.0679388	0.00544936
NP_610453.1	Pmm45A	phosphomannomutase 45A [Drosophila melanogaster]	2	623	1.11	0.987559	0.15056	0.00543693
NP_611751.1	l(2)k09913	lethal (2) k09913, isoform C [Drosophila melanogaster]	10	389	0.939	0.987585	-0.0908029	0.0054256
NP_523910.1	mge	maggie, isoform A [Drosophila melanogaster]	7	148	0.925	0.987586	-0.112475	0.00542505
NP_569844.2	CG3156	CG3156 [Drosophila melanogaster]	7	692	1.124	0.988358	0.168642	0.00508586
NP_728930.1	Gad1	glutamic acid decarboxylase 1, isoform B [Drosophila melanogaster]	15	510	1.076	0.988818	0.105678	0.00488346
NP_648155.1	CG7409	CG7409 [Drosophila melanogaster]	6	154	1.145	0.988993	0.195348	0.00480698
NP_723532.1	CG4908	CG4908, isoform B [Drosophila melanogaster]	9	431	0.962	0.989025	-0.0558912	0.00479275
NP_477229.3	Gs1l	GS1-like, isoform B [Drosophila melanogaster]	3	231	1.175	0.989194	0.232661	0.00471835
NP_651284.1	CG5805	CG5805, isoform A [Drosophila melanogaster]	2	339	1.083	0.989494	0.115033	0.00458689
NP_649565.1	CG12170	uncharacterized protein Dmel_CG12170 [Drosophila melanogaster]	6	438	1.048	0.98958	0.0676387	0.00454922
NP_608934.1	CG7277	CG7277 [Drosophila melanogaster]	9	477	0.961	0.989614	-0.0573917	0.00453412
NP_723060.1	RpL37A	ribosomal protein L37A, isoform B [Drosophila melanogaster]	4	92	1.08	0.99006	0.111031	0.00433869
NP_001189070.1	Ank2	ankyrin 2, isoform U [Drosophila melanogaster]	3	13559	1.118	0.990526	0.16092	0.00413415
NP_001259148.1	mRpL16	mitochondrial ribosomal protein L16, isoform B [Drosophila melanogaster]	6	243	1.063	0.99066	0.0881416	0.00407556
NP_524613.1	FeCH	ferrochelatase, isoform A [Drosophila melanogaster]	23	384	1.087	0.990703	0.120352	0.00405671
NP_648092.1	mRpL50	mitochondrial ribosomal protein L50 [Drosophila melanogaster]	7	189	1.045	0.990735	0.0635029	0.00404245
NP_524816.1	Lsp2	larval serum protein 2, isoform A [Drosophila melanogaster]	18	701	1.122	0.990957	0.166073	0.00394506
NP_788887.1	CG10962	uncharacterized protein Dmel_CG10962 [Drosophila melanogaster]	3	249	1.041	0.991091	0.0579701	0.00388629
NP_610774.3	Cpr49Ae	cuticular protein 49Ae [Drosophila melanogaster]	6	134	1.261	0.991152	0.334568	0.00385987
NP_651954.3	RpL10	ribosomal protein L10, isoform C [Drosophila melanogaster]	11	218	0.948	0.991313	-0.077041	0.00378916
NP_524546.2	Pglym78	phosphoglyceromutase, isoform A [Drosophila melanogaster]	17	255	1.046	0.991503	0.0648829	0.00370617
NP_511166.2	mRpL3	mitochondrial ribosomal protein L3 [Drosophila melanogaster]	15	362	1.038	0.9916	0.0538064	0.00366349
NP_609329.3	CG4619	CG4619, isoform A [Drosophila melanogaster]	8	570	0.926	0.991652	-0.110916	0.00364085
NP_001246483.1	l(2)tid	lethal (2) tumorous imaginal discs, isoform D [Drosophila melanogaster]	1	514	1.129	0.991686	0.175045	0.00362574
NP_608888.2	Gmd	GDP-mannose 4,6-dehydratase [Drosophila melanogaster]	4	395	0.964	0.992796	-0.0528949	0.00314007
NP_001027073.1	Shawn	shawn, isoform B [Drosophila melanogaster]	4	387	1.095	0.9932	0.130931	0.0029632
NP_001246500.1	GstE12	glutathione S transferase E12, isoform B [Drosophila melanogaster]	6	223	0.888	0.993325	-0.171368	0.00290849
NP_001259731.1	Alr	augmenter of liver regeneration, isoform B [Drosophila melanogaster]	5	266	1.075	0.993333	0.104337	0.00290504
NP_001137910.2	Idh	isocitrate dehydrogenase, isoform K [Drosophila melanogaster]	33	479	0.957	0.993579	-0.0634092	0.00279757
NP_001246473.1	CG3499	CG3499, isoform C [Drosophila melanogaster]	38	740	0.97	0.994087	-0.0439433	0.00257582
NP_001245568.1	Rab39	Rab39, isoform B [Drosophila melanogaster]	8	218	0.959	0.994419	-0.0603973	0.00243077
NP_648446.1	CG7616	CG7616, isoform A [Drosophila melanogaster]	6	557	1.059	0.994514	0.0827026	0.00238912
NP_611540.1	CG15653	uncharacterized protein Dmel_CG15653 [Drosophila melanogaster]	3	170	0.944	0.994596	-0.0831412	0.00235346
NP_730248.2	CG6512	CG6512, isoform A [Drosophila melanogaster]	59	826	0.968	0.994613	-0.046921	0.0023459
NP_524355.2	mRpS10	mitochondrial ribosomal protein S10, isoform B [Drosophila melanogaster]	5	173	0.941	0.994884	-0.0877334	0.00222741
NP_611265.1	OstDelta	oligosaccharide transferase delta subunit, isoform A [Drosophila melanogaster]	40	634	0.944	0.994903	-0.0831412	0.00221914
NP_610687.1	Egm	enigma [Drosophila melanogaster]	22	639	0.939	0.995018	-0.0908029	0.00216921
NP_001137835.2	Irk3	inwardly rectifying potassium channel 3, isoform D [Drosophila melanogaster]	1	446	1.104	0.995109	0.14274	0.00212932
NP_523976.1	Arr2	arrestin 2 [Drosophila melanogaster]	25	401	0.949	0.995323	-0.07552	0.00203585
NP_001285895.1	RpL24	ribosomal protein L24, isoform B [Drosophila melanogaster]	15	155	1.067	0.995669	0.0935602	0.00188495
NP_650586.2	AdSL	adenylosuccinate lyase [Drosophila melanogaster]	9	481	1.057	0.995965	0.0799754	0.00175603
NP_611071.1	Pex11	peroxin 11 [Drosophila melanogaster]	2	241	1.1	0.996109	0.137504	0.00169303
NP_732214.1	CG31267	uncharacterized protein Dmel_CG31267 [Drosophila melanogaster]	1	275	0.877	0.996286	-0.189351	0.00161613
NP_524275.1	mRpL1	mitochondrial ribosomal protein L1 [Drosophila melanogaster]	11	354	0.961	0.996337	-0.0573917	0.00159387
NP_732081.1	glob1	globin 1, isoform A [Drosophila melanogaster]	5	153	0.917	0.996419	-0.125006	0.00155781
NP_650780.1	mRpL55	mitochondrial ribosomal protein L55 [Drosophila melanogaster]	5	107	1.06	0.996454	0.0840643	0.00154261
NP_524004.2	RpS9	ribosomal protein S9, isoform A [Drosophila melanogaster]	16	195	1.122	0.99651	0.166073	0.00151848
NP_609912.1	CG17597	uncharacterized protein Dmel_CG17597, isoform A [Drosophila melanogaster]	8	407	0.931	0.996552	-0.103147	0.00150017
NP_523828.1	mRpL43	mitochondrial ribosomal protein L43 [Drosophila melanogaster]	11	192	1.028	0.996651	0.0398403	0.0014567
NP_649749.2	CG2846	CG2846, isoform A [Drosophila melanogaster]	6	153	1.043	0.996655	0.0607392	0.00145532
NP_610523.2	CG1665	CG1665 [Drosophila melanogaster]	17	340	0.954	0.996787	-0.0679388	0.00139752
NP_728548.1	CG13887	uncharacterized protein Dmel_CG13887, isoform C [Drosophila melanogaster]	16	228	0.932	0.996854	-0.101598	0.00136836
NP_477025.1	pav	pavarotti [Drosophila melanogaster]	5	887	1.046	0.996987	0.0648829	0.00131069
NP_524210.1	Act79B	actin 79B, isoform A [Drosophila melanogaster]	6	376	1.028	0.99701	0.0398403	0.00130056
NP_476759.1	Egfr	epidermal growth factor receptor, isoform B [Drosophila melanogaster]	6	1426	0.958	0.997116	-0.0619024	0.00125424
NP_608890.1	CG8891	CG8891 [Drosophila melanogaster]	6	191	0.96	0.997161	-0.0588937	0.0012349
NP_732364.1	CG31229	uncharacterized protein Dmel_CG31229 [Drosophila melanogaster]	2	195	0.965	0.9972	-0.0513992	0.00121754
NP_001285170.1	mRpL49	mitochondrial ribosomal protein L49, isoform B [Drosophila melanogaster]	5	179	1.023	0.997225	0.0328061	0.00120701
NP_001163108.1	Ccs	copper chaperone for superoxide dismutase, isoform B [Drosophila melanogaster]	5	264	0.933	0.99733	-0.100051	0.00116106
NP_730774.1	CkIIalpha	casein kinase IIalpha, isoform A [Drosophila melanogaster]	3	336	1.059	0.997403	0.0827026	0.00112934
NP_996339.2	CG2658	CG2658, isoform C [Drosophila melanogaster]	45	819	1.042	0.997538	0.0593553	0.00107045
NP_649099.1	CG9629	CG9629 [Drosophila melanogaster]	25	540	0.964	0.997551	-0.0528949	0.00106505
NP_477462.1	Decay	death executioner caspase related to Apopain/Yama [Drosophila melanogaster]	1	308	1.114	0.99793	0.155749	0.000899888
NP_649906.1	AP-1mu	adaptor protein complex 1, mu subunit [Drosophila melanogaster]	2	426	1.054	0.997953	0.0758749	0.000889989
NP_725669.1	Prosalpha5	proteasome alpha5 subunit, isoform A [Drosophila melanogaster]	3	244	0.935	0.998132	-0.0969617	0.000812104
NP_787986.1	Rtnl1	Reticulon-like1, isoform D [Drosophila melanogaster]	1	224	1.048	0.998407	0.0676387	0.000692495
NP_001036532.1	sns	sticks and stones, isoform B [Drosophila melanogaster]	2	1542	1.067	0.998419	0.0935602	0.000687075
NP_572278.1	CG3011	CG3011, isoform A [Drosophila melanogaster]	28	537	0.977	0.998456	-0.0335695	0.000671007
NP_001014491.1	ref(2)P	refractory to sigma P, isoform B [Drosophila melanogaster]	13	599	0.942	0.99847	-0.086201	0.000665043
NP_651415.1	CG4743	CG4743 [Drosophila melanogaster]	1	297	0.925	0.998562	-0.112475	0.000625123
NP_650916.1	CG17271	uncharacterized protein Dmel_CG17271, isoform A [Drosophila melanogaster]	4	281	1.077	0.998594	0.107018	0.000610853
NP_651417.1	RpL27	ribosomal protein L27, isoform A [Drosophila melanogaster]	10	135	0.974	0.998628	-0.0380063	0.000596087
NP_572927.1	CG11095	uncharacterized protein Dmel_CG11095 [Drosophila melanogaster]	1	283	1.062	0.998664	0.0867838	0.000580629
NP_651195.1	RpS19b	ribosomal protein S19b, isoform B [Drosophila melanogaster]	4	155	1.081	0.99875	0.112367	0.000543101
NP_727973.1	CG4239	CG4239, isoform B [Drosophila melanogaster]	4	276	0.936	0.998774	-0.0954196	0.00053292
NP_001285042.1	t	tan, isoform B [Drosophila melanogaster]	7	387	0.977	0.998774	-0.0335695	0.00053286
NP_733341.1	CG7943	CG7943, isoform B [Drosophila melanogaster]	4	332	1.026	0.998777	0.0370307	0.000531571
NP_001261643.1	CG6767	CG6767, isoform F [Drosophila melanogaster]	1	369	1.069	0.998792	0.0962619	0.000525131
NP_650142.1	Ect3	Ectoderm-expressed 3 [Drosophila melanogaster]	9	637	1.038	0.998819	0.0538064	0.00051307
NP_001261040.1	GstS1	glutathione S transferase S1, isoform D [Drosophila melanogaster]	1	250	1.106	0.998847	0.145351	0.00050122
NP_648408.1	CG11811	uncharacterized protein Dmel_CG11811 [Drosophila melanogaster]	16	233	1.019	0.998852	0.0271541	0.000498719
NP_001285723.1	Rack1	receptor of activated protein kinase C 1, isoform D [Drosophila melanogaster]	9	318	0.949	0.998901	-0.07552	0.000477641
NP_731252.1	mRpS18A	mitochondrial ribosomal protein S18A [Drosophila melanogaster]	3	155	1.032	0.99892	0.045443	0.000469202
NP_609397.2	CG5355	CG5355 [Drosophila melanogaster]	35	756	0.982	0.998933	-0.0262051	0.000463639
NP_525002.1	Jafrac2	thioredoxin peroxidase 2, isoform A [Drosophila melanogaster]	8	242	0.955	0.99895	-0.0664274	0.000456085
NP_524240.1	Atu	another transcription unit [Drosophila melanogaster]	1	725	0.948	0.99906	-0.077041	0.000408294
NP_477375.1	Ef1alpha48D	elongation factor 1alpha48D, isoform A [Drosophila melanogaster]	22	463	1.033	0.999075	0.0468403	0.000401823
NP_649849.1	CAHbeta	carbonic anhydrase beta, isoform A [Drosophila melanogaster]	3	255	1.028	0.999184	0.0398403	0.000354414
NP_649970.1	CG11722	uncharacterized protein Dmel_CG11722 [Drosophila melanogaster]	15	203	0.981	0.999189	-0.027675	0.000352412
NP_651460.2	RpL34a	ribosomal protein L34a, isoform A [Drosophila melanogaster]	2	162	0.964	0.999257	-0.0528949	0.000322669
NP_001260183.1	Ndae1	Na[+]-driven anion exchanger 1, isoform J [Drosophila melanogaster]	1	1046	1.068	0.999282	0.0949116	0.000312131
NP_001285107.1	CG2076	CG2076, isoform B [Drosophila melanogaster]	4	341	0.971	0.999296	-0.0424568	0.00030605
NP_001163664.1	CG4159	CG4159, isoform B [Drosophila melanogaster]	3	442	0.969	0.9993	-0.0454314	0.00030423
NP_648511.2	CG14130	uncharacterized protein Dmel_CG14130 [Drosophila melanogaster]	2	255	0.949	0.99933	-0.07552	0.000290954
NP_570027.1	ttm50	tiny tim 50, isoform A [Drosophila melanogaster]	23	428	1.017	0.999373	0.0243197	0.000272257
NP_651221.1	CG6178	CG6178 [Drosophila melanogaster]	27	544	0.965	0.999389	-0.0513992	0.000265505
NP_648272.1	pix	pixie, isoform A [Drosophila melanogaster]	10	611	0.968	0.999393	-0.046921	0.000263751
NP_651001.2	mRpL35	mitochondrial ribosomal protein L35 [Drosophila melanogaster]	1	178	0.958	0.999393	-0.0619024	0.0002637
NP_651120.1	CG6726	CG6726, isoform A [Drosophila melanogaster]	11	401	0.984	0.99945	-0.0232698	0.000238874
NP_001260128.1	Cpr	cytochrome P450 reductase, isoform C [Drosophila melanogaster]	47	679	1.027	0.999475	0.0384362	0.000227951
NP_573054.2	CG9240	CG9240, isoform A [Drosophila melanogaster]	2	166	1.045	0.999493	0.0635029	0.000220029
NP_001260638.1	CG9319	CG9319, isoform B [Drosophila melanogaster]	11	373	1.035	0.999512	0.0496308	0.000211852
NP_523476.1	mRpL24	mitochondrial ribosomal protein L24 [Drosophila melanogaster]	21	247	1.018	0.999527	0.0257376	0.000205527
NP_648328.1	CG3408	CG3408, isoform A [Drosophila melanogaster]	4	331	0.956	0.999534	-0.0649175	0.000202518
NP_724340.1	nrv3	nervana 3, isoform D [Drosophila melanogaster]	1	311	1.086	0.999601	0.119024	0.000173483
NP_731494.1	CG31278	uncharacterized protein Dmel_CG31278, isoform A [Drosophila melanogaster]	3	238	1.022	0.999604	0.0313952	0.00017223
NP_733230.1	CG12428	uncharacterized protein Dmel_CG12428, isoform A [Drosophila melanogaster]	25	618	1.038	0.999627	0.0538064	0.000162024
NP_610093.1	CG9248	CG9248, isoform B [Drosophila melanogaster]	11	494	1.031	0.99963	0.0440443	0.000160687
NP_723772.2	MRP	Multidrug-Resistance like protein 1, isoform A [Drosophila melanogaster]	51	1549	0.967	0.999643	-0.0484122	0.000154859
NP_651446.2	CG42235	uncharacterized protein Dmel_CG42235, isoform D [Drosophila melanogaster]	3	698	0.975	0.999658	-0.0365259	0.000148423
NP_647847.1	Mul1	mitochondrial E3 ubiquitin protein ligase 1, isoform A [Drosophila melanogaster]	8	338	1.015	0.999695	0.0214797	0.000132266
NP_524921.1	Pp1-13C	protein phosphatase 1 at 13C [Drosophila melanogaster]	1	302	0.971	0.999729	-0.0424568	0.000117559
NP_649070.1	RpL26	ribosomal protein L26, isoform A [Drosophila melanogaster]	14	149	0.981	0.999732	-0.027675	0.000116467
NP_477228.1	Gs1l	GS1-like, isoform A [Drosophila melanogaster]	2	231	1.05	0.999734	0.0703893	0.000115581
NP_648091.1	RpL18	ribosomal protein L18, isoform A [Drosophila melanogaster]	10	188	0.976	0.999748	-0.0350469	0.0001095
NP_649289.2	CG10512	uncharacterized protein Dmel_CG10512, isoform A [Drosophila melanogaster]	6	446	1.016	0.999749	0.0229004	0.00010884
NP_650054.2	CG17726	uncharacterized protein Dmel_CG17726 [Drosophila melanogaster]	7	437	1.035	0.999772	0.0496308	9.90251e-05
NP_728308.1	Nup205	nucleoporin 205kD, isoform B [Drosophila melanogaster]	8	2090	0.973	0.999776	-0.0394883	9.7386e-05
NP_001259693.1	CG7322	CG7322, isoform B [Drosophila melanogaster]	5	242	1.014	0.999781	0.0200577	9.49565e-05
NP_649411.1	CG14450	uncharacterized protein Dmel_CG14450, isoform A [Drosophila melanogaster]	4	372	0.973	0.999796	-0.0394883	8.84882e-05
NP_652626.1	Ugt86Da	Ugt86Da [Drosophila melanogaster]	16	528	0.977	0.999801	-0.0335695	8.63997e-05
NP_001097274.1	CG34228	uncharacterized protein Dmel_CG34228 [Drosophila melanogaster]	4	88	0.983	0.999804	-0.0247367	8.51219e-05
NP_650751.3	CG7718	CG7718 [Drosophila melanogaster]	9	494	1.034	0.999807	0.0482362	8.40397e-05
NP_001285329.1	eIF-2alpha	eukaryotic translation initiation factor 2alpha, isoform B [Drosophila melanogaster]	14	341	1.029	0.99981	0.041243	8.27293e-05
NP_523630.1	Tsp42Ed	tetraspanin 42Ed, isoform A [Drosophila melanogaster]	1	227	1.039	0.999823	0.0551957	7.68474e-05
NP_524711.1	Hmgs	HMG coenzyme A synthase, isoform A [Drosophila melanogaster]	5	465	0.973	0.999839	-0.0394883	7.00059e-05
NP_610314.1	CG12107	uncharacterized protein Dmel_CG12107 [Drosophila melanogaster]	1	135	1.064	0.999839	0.0894982	6.99755e-05
NP_573196.1	CG5010	CG5010, isoform A [Drosophila melanogaster]	5	170	0.947	0.999841	-0.0785637	6.92743e-05
NP_001104429.2	RpL15	ribosomal protein L15, isoform E [Drosophila melanogaster]	6	204	0.979	0.99985	-0.0306192	6.52425e-05
NP_649169.3	Tom20	translocase of outer membrane 20, isoform A [Drosophila melanogaster]	7	171	0.986	0.999861	-0.0203404	6.03792e-05
NP_001014650.2	jar	jaguar, isoform H [Drosophila melanogaster]	46	1268	0.969	0.999861	-0.0454314	6.02831e-05
NP_524331.2	Arp1	Actin-related protein 1 [Drosophila melanogaster]	10	376	1.039	0.999883	0.0551957	5.09924e-05
NP_001285979.1	CaBP1	calcium-binding protein 1, isoform B [Drosophila melanogaster]	19	433	0.957	0.999884	-0.0634092	5.04325e-05
NP_728384.1	Cbs	cystathionine beta-synthase, isoform B [Drosophila melanogaster]	7	522	0.993	0.999889	-0.0101344	4.84188e-05
NP_001260305.1	CG4594	CG4594, isoform B [Drosophila melanogaster]	2	280	0.975	0.999892	-0.0365259	4.69366e-05
NP_727948.1	CG9911	CG9911, isoform D [Drosophila melanogaster]	25	412	0.974	0.999893	-0.0380063	4.64923e-05
NP_649250.2	CG4042	CG4042, isoform A [Drosophila melanogaster]	5	284	0.985	0.999899	-0.0218044	4.37977e-05
NP_524996.1	bor	belphegor, isoform A [Drosophila melanogaster]	62	604	1.024	0.9999	0.0342157	4.35278e-05
NP_611119.1	CG7997	CG7997, isoform A [Drosophila melanogaster]	11	417	0.981	0.999914	-0.027675	3.71526e-05
NP_612087.1	Sac1	Sac1 phosphatase, isoform A [Drosophila melanogaster]	16	592	1.023	0.999923	0.0328061	3.3425e-05
NP_001260353.1	CG6094	CG6094, isoform B [Drosophila melanogaster]	8	203	0.985	0.999928	-0.0218044	3.12005e-05
NP_650831.1	CG11407	uncharacterized protein Dmel_CG11407 [Drosophila melanogaster]	2	538	0.969	0.999933	-0.0454314	2.90049e-05
NP_996462.1	Gbeta13F	G protein beta-subunit 13F, isoform C [Drosophila melanogaster]	9	340	0.97	0.999937	-0.0439433	2.75298e-05
NP_724013.1	Ugt36Bc	Ugt36Bc, isoform B [Drosophila melanogaster]	13	543	1.008	0.999941	0.0114956	2.57996e-05
NP_609916.5	CG10602	uncharacterized protein Dmel_CG10602, isoform F [Drosophila melanogaster]	10	684	0.984	0.999951	-0.0232698	2.13561e-05
NP_727380.1	CG32694	uncharacterized protein Dmel_CG32694, isoform A [Drosophila melanogaster]	2	349	1.028	0.999962	0.0398403	1.63874e-05
NP_651038.3	CG13850	uncharacterized protein Dmel_CG13850, isoform A [Drosophila melanogaster]	17	564	1.018	0.999966	0.0257376	1.47274e-05
NP_610823.1	CG3790	CG3790 [Drosophila melanogaster]	3	604	0.989	0.999978	-0.0159576	9.52195e-06
NP_727418.1	flw	flapwing, isoform A [Drosophila melanogaster]	3	461	0.967	0.999981	-0.0484122	8.46664e-06
NP_612065.1	CG13890	uncharacterized protein Dmel_CG13890 [Drosophila melanogaster]	12	262	1.017	0.999981	0.0243197	8.43831e-06
NP_572996.1	Lsd-2	lipid storage droplet-2, isoform A [Drosophila melanogaster]	2	352	0.967	0.999982	-0.0484122	7.7638e-06
NP_733144.3	Ald	aldolase, isoform K [Drosophila melanogaster]	43	361	0.99	0.999985	-0.0144996	6.67664e-06
NP_609973.1	CG10194	uncharacterized protein Dmel_CG10194 [Drosophila melanogaster]	6	351	0.99	0.999988	-0.0144996	5.21557e-06
NP_733356.2	RpS7	ribosomal protein S7, isoform E [Drosophila melanogaster]	18	194	1.022	0.999989	0.0313952	4.9655e-06
NP_731644.2	CG6950	CG6950, isoform C [Drosophila melanogaster]	8	450	1.006	0.99999	0.00863031	4.50224e-06
NP_725191.1	Galphaq	G protein alpha q subunit, isoform A [Drosophila melanogaster]	3	353	0.989	0.99999	-0.0159576	4.32229e-06
NP_569849.1	CG13365	uncharacterized protein Dmel_CG13365 [Drosophila melanogaster]	3	114	1.008	0.999991	0.0114956	3.69266e-06
NP_610831.1	CG13321	uncharacterized protein Dmel_CG13321, isoform A [Drosophila melanogaster]	11	286	0.98	0.999992	-0.0291463	3.43202e-06
NP_001246503.1	key	kenny, isoform B [Drosophila melanogaster]	2	389	1.017	0.999993	0.0243197	3.14893e-06
NP_650962.1	CG5919	CG5919, isoform A [Drosophila melanogaster]	5	256	0.988	0.999993	-0.0174171	3.09628e-06
NP_996213.1	CG33331	uncharacterized protein Dmel_CG33331 [Drosophila melanogaster]	7	342	0.989	0.999995	-0.0159576	1.97848e-06
NP_649887.1	RpL34b	ribosomal protein L34b, isoform A [Drosophila melanogaster]	5	168	1.011	0.999998	0.015783	9.76246e-07
NP_609119.2	CG5958	CG5958 [Drosophila melanogaster]	12	294	1.021	0.999998	0.0299829	6.7738e-07
NP_001137630.2	Pal1	Peptidyl-alpha-hydroxyglycine-alpha-amidating lyase 1, isoform D [Drosophila melanogaster]	1	541	0.991	0.999999	-0.013043	6.42411e-07
NP_572320.2	Marf	mitochondrial assembly regulatory factor, isoform D [Drosophila melanogaster]	25	814	1.004	0.999999	0.00575927	5.70896e-07
NP_651838.1	l(3)03670	lethal (3) 03670 [Drosophila melanogaster]	21	223	1.01	0.999999	0.0143553	5.2395e-07
NP_724804.1	RpL31	ribosomal protein L31, isoform A [Drosophila melanogaster]	11	124	0.997	0.999999	-0.00433459	3.87128e-07
NP_001285414.1	phm	phantom, isoform B [Drosophila melanogaster]	1	574	0.981	0.999999	-0.027675	3.49546e-07
NP_788024.1	CG33129	uncharacterized protein Dmel_CG33129, isoform A [Drosophila melanogaster]	3	237	1.011	0.999999	0.015783	3.3425e-07
NP_001286077.1	CG10639	uncharacterized protein Dmel_CG10639, isoform C [Drosophila melanogaster]	22	455	1.002	1	0.00288251	7.58191e-08
NP_727284.1	Ppt1	Palmitoyl-protein thioesterase 1, isoform A [Drosophila melanogaster]	9	314	1.006	1	0.00863031	7.21437e-08
NP_001188689.2	RpL27A	ribosomal protein L27A, isoform C [Drosophila melanogaster]	9	149	0.997	1	-0.00433459	6.1306e-08
NP_001261261.1	CG12091	uncharacterized protein Dmel_CG12091, isoform B [Drosophila melanogaster]	1	321	0.993	1	-0.0101344	4.73439e-08
NP_651876.1	RpL6	ribosomal protein L6, isoform B [Drosophila melanogaster]	22	262	0.995	1	-0.00723157	3.23423e-08
NP_649302.1	CG7632	CG7632, isoform A [Drosophila melanogaster]	7	330	0.997	1	-0.00433459	1.40267e-08
NP_524819.1	RpL12	ribosomal protein L12, isoform A [Drosophila melanogaster]	7	165	1.002	1	0.00288251	8.58594e-09
NP_610922.1	CG8067	CG8067, isoform A [Drosophila melanogaster]	3	333	0.998	1	-0.00288828	2.57876e-09
NP_524538.2	RpL4	ribosomal protein L4 [Drosophila melanogaster]	33	401	0.998	1	-0.00288828	1.49649e-09
NP_608516.1	CG11562	uncharacterized protein Dmel_CG11562 [Drosophila melanogaster]	2	125	0.997	1	-0.00433459	9.99813e-10
NP_651701.1	alph	alphabet, isoform E [Drosophila melanogaster]	9	374	0.999	1	-0.00144342	2.18128e-10

## Sheet: Pink1 vs WT as mitomax
Pink1 (PK) vs WT (F) proteins with >1 unique peptide and common with MitoMax
Accession	Proteins	Description	# Unique Peptides	# Aas	Abundance Ratio: (PK) / (F)	Abundance Ratio P-Value: (PK) / (F)	Abundance Ratio: log2 (PK) / (F)	Abundance Ratio P-Value: -log10-(PK) / (F)
NP_536744.2	mtSSB	mitochondrial single stranded DNA-binding protein [Drosophila melanogaster]	7	146	0.317	1.85864e-05	-1.65745	4.7308
NP_611541.1	mRpL54	mitochondrial ribosomal protein L54 [Drosophila melanogaster]	1	132	0.483	0.000102019	-1.0499	3.99132
NP_511102.3	Yp2	yolk protein 2, isoform A [Drosophila melanogaster]	34	442	0.042	0.000209297	-4.57347	3.67924
NP_650648.3	Pxt	Peroxinectin-like [Drosophila melanogaster]	31	809	0.267	0.00038683	-1.90509	3.41248
NP_511148.2	Yp3	yolk protein 3, isoform A [Drosophila melanogaster]	31	420	0.039	0.000391946	-4.68038	3.40677
NP_651727.1	CG7834	CG7834, isoform A [Drosophila melanogaster]	26	253	0.492	0.000470919	-1.02327	3.32705
NP_652281.1	CG4186	CG4186, isoform A [Drosophila melanogaster]	2	85	0.186	0.000482306	-2.42663	3.31668
NP_523828.1	mRpL43	mitochondrial ribosomal protein L43 [Drosophila melanogaster]	11	192	0.393	0.000542765	-1.3474	3.26539
NP_001285071.1	Yp1	yolk protein 1, isoform B [Drosophila melanogaster]	34	439	0.074	0.000545514	-3.75633	3.26319
NP_523473.2	mRpS2	mitochondrial ribosomal protein S2 [Drosophila melanogaster]	5	264	0.491	0.000878319	-1.02621	3.05635
NP_611805.1	levy	levy, isoform A [Drosophila melanogaster]	7	109	0.259	0.00126266	-1.94898	2.89871
NP_523602.2	Top3alpha	topoisomerase 3alpha [Drosophila melanogaster]	3	1250	0.408	0.00145344	-1.29336	2.8376
NP_572639.2	CG1628	CG1628, isoform B [Drosophila melanogaster]	4	459	0.44	0.00146973	-1.18442	2.83276
NP_610854.1	CG4679	CG4679 [Drosophila melanogaster]	18	652	0.331	0.00150726	-1.5951	2.82181
NP_726881.1	Rala	Ras-like protein A, isoform B [Drosophila melanogaster]	3	197	0.49	0.00156359	-1.02915	2.80588
NP_511087.1	Cp36	chorion protein 36 [Drosophila melanogaster]	12	284	0.165	0.00187177	-2.59946	2.72775
NP_001260339.1	mRpS7	mitochondrial ribosomal protein S7, isoform B [Drosophila melanogaster]	12	218	0.432	0.00200153	-1.2109	2.69864
NP_611983.2	Tina-1	troponin C-akin-1, isoform A [Drosophila melanogaster]	8	167	0.493	0.00214277	-1.02034	2.66903
NP_650774.1	NP15.6	NP15.6 [Drosophila melanogaster]	7	150	0.301	0.00219798	-1.73216	2.65798
NP_788610.1	mRpL47	mitochondrial ribosomal protein L47 [Drosophila melanogaster]	8	271	0.403	0.00232729	-1.31115	2.63315
NP_525119.1	mRpS17	mitochondrial ribosomal protein S17 [Drosophila melanogaster]	8	155	0.496	0.00239021	-1.01159	2.62156
NP_722715.1	RFeSP	rieske iron-sulfur protein, isoform B [Drosophila melanogaster]	17	230	0.491	0.00261952	-1.02621	2.58178
NP_511153.1	mRpS25	mitochondrial ribosomal protein S25 [Drosophila melanogaster]	5	167	0.323	0.0026584	-1.63039	2.57538
NP_001246623.1	mRpS6	mitochondrial ribosomal protein S6, isoform B [Drosophila melanogaster]	7	147	0.415	0.00280438	-1.26882	2.55216
NP_727464.1	CG1637	CG1637, isoform A [Drosophila melanogaster]	1	453	0.322	0.00291931	-1.63487	2.53472
NP_609999.2	CG10628	uncharacterized protein Dmel_CG10628 [Drosophila melanogaster]	4	383	0.285	0.00301676	-1.81097	2.52046
NP_511072.2	2020-12-01	defective chorion 1, isoform A [Drosophila melanogaster]	2	1590	0.321	0.00302419	-1.63935	2.51939
NP_611691.1	bonsai	bonsai [Drosophila melanogaster]	8	280	0.441	0.00336637	-1.18115	2.47284
NP_523893.1	mRpS35	mitochondrial ribosomal protein S35 [Drosophila melanogaster]	10	326	0.428	0.00359686	-1.22432	2.44408
NP_477377.1	CG4882	CG4882, isoform A [Drosophila melanogaster]	21	406	0.455	0.00385033	-1.13606	2.4145
NP_524382.1	mRpS11	mitochondrial ribosomal protein S11 [Drosophila melanogaster]	5	200	0.47	0.00424669	-1.08927	2.37195
NP_524415.1	TFAM	mitochondrial transcription factor A, isoform A [Drosophila melanogaster]	30	257	0.49	0.00449433	-1.02915	2.34734
NP_727905.1	sun	stunted, isoform B [Drosophila melanogaster]	2	57	0.453	0.00488734	-1.14242	2.31093
NP_733266.1	CG11876	uncharacterized protein Dmel_CG11876, isoform B [Drosophila melanogaster]	3	273	0.298	0.00491619	-1.74662	2.30837
NP_524364.2	FK506-bp1	FK506-binding protein 1 [Drosophila melanogaster]	16	357	0.347	0.00496827	-1.52699	2.3038
NP_733332.1	Acph-1	acid phosphatase 1, isoform B [Drosophila melanogaster]	8	455	0.358	0.00602129	-1.48197	2.22031
NP_536787.1	cype	cyclope, isoform A [Drosophila melanogaster]	9	77	0.353	0.00637978	-1.50226	2.19519
NP_647661.1	mRpL46	mitochondrial ribosomal protein L46 [Drosophila melanogaster]	13	258	0.215	0.00646457	-2.21759	2.18946
NP_611468.1	CG9090	CG9090, isoform A [Drosophila melanogaster]	20	374	0.355	0.00697239	-1.49411	2.15662
NP_001260353.1	CG6094	CG6094, isoform B [Drosophila melanogaster]	8	203	0.45	0.00708499	-1.152	2.14966
NP_524606.1	mRpL32	mitochondrial ribosomal protein L32 [Drosophila melanogaster]	5	195	0.305	0.00709893	-1.71312	2.14881
NP_649541.1	mRpL44	mitochondrial ribosomal protein L44 [Drosophila melanogaster]	11	321	0.346	0.0075386	-1.53116	2.12271
NP_524134.1	mRpS26	mitochondrial ribosomal protein S26 [Drosophila melanogaster]	8	225	0.408	0.00804994	-1.29336	2.09421
NP_648446.1	CG7616	CG7616, isoform A [Drosophila melanogaster]	6	557	0.384	0.00843344	-1.38082	2.074
NP_001303469.1	CG11035	uncharacterized protein Dmel_CG11035, isoform B [Drosophila melanogaster]	8	231	0.276	0.0087253	-1.85726	2.05922
NP_787987.1	Rtnl1	Reticulon-like1, isoform A [Drosophila melanogaster]	1	222	0.188	0.00899595	-2.4112	2.04595
NP_648843.1	CG5157	CG5157 [Drosophila melanogaster]	4	119	0.293	0.00925317	-1.77103	2.03371
NP_610184.2	Gp210	glycoprotein 210 kDa, isoform A [Drosophila melanogaster]	23	1876	0.438	0.0104146	-1.191	1.98236
NP_001246494.1	Nurf-38	nucleosome remodeling factor - 38kD, isoform C [Drosophila melanogaster]	1	290	0.433	0.0110677	-1.20756	1.95594
NP_651051.1	Pebp1	Phosphatidylethanolamine-binding protein 1 [Drosophila melanogaster]	9	176	0.104	0.012387	-3.26534	1.90703
NP_001285037.1	CG9034	CG9034, isoform B [Drosophila melanogaster]	3	77	0.435	0.0124987	-1.20091	1.90314
NP_001245846.1	CG34172	uncharacterized protein Dmel_CG34172, isoform B [Drosophila melanogaster]	2	62	0.234	0.0139092	-2.09542	1.8567
NP_732653.2	CG31233	uncharacterized protein Dmel_CG31233, isoform A [Drosophila melanogaster]	40	952	0.241	0.0152089	-2.05289	1.8179
NP_524197.1	ppl	pumpless [Drosophila melanogaster]	4	165	0.475	0.0161491	-1.074	1.79185
NP_476821.1	tam	tamas [Drosophila melanogaster]	4	1145	0.469	0.0167411	-1.09234	1.77622
NP_524270.2	mRpS9	mitochondrial ribosomal protein S9 [Drosophila melanogaster]	11	395	0.459	0.0177782	-1.12343	1.75011
NP_524593.1	mRpS18C	mitochondrial ribosomal protein S18C [Drosophila melanogaster]	6	140	0.439	0.0185755	-1.18771	1.73106
NP_001259878.1	mRpL48	mitochondrial ribosomal protein L48, isoform B [Drosophila melanogaster]	5	181	0.342	0.020013	-1.54793	1.69869
NP_996529.1	CG33502	uncharacterized protein Dmel_CG33502 [Drosophila melanogaster]	5	283	0.427	0.0202714	-1.22769	1.69312
NP_609324.2	CG4592	CG4592, isoform A [Drosophila melanogaster]	1	287	0.449	0.0205317	-1.15521	1.68757
NP_523811.1	mRpS29	mitochondrial ribosomal protein S29 [Drosophila melanogaster]	11	392	0.35	0.0208137	-1.51457	1.68165
NP_001245533.1	Mlc-c	myosin light chain cytoplasmic, isoform B [Drosophila melanogaster]	6	153	0.4	0.0213696	-1.32193	1.6702
NP_523765.1	Fen1	flap endonuclease 1 [Drosophila melanogaster]	2	385	0.463	0.0221601	-1.11092	1.65443
NP_610910.1	CG6543	CG6543, isoform A [Drosophila melanogaster]	15	295	0.428	0.0235199	-1.22432	1.62857
NP_523737.1	mRpS16	mitochondrial ribosomal protein S16 [Drosophila melanogaster]	4	129	0.049	0.0240453	-4.35107	1.61897
NP_609479.1	dUTPase	deoxyuridine triphosphatase, isoform A [Drosophila melanogaster]	8	188	0.255	0.0244947	-1.97143	1.61093
NP_724345.1	His3:CG31613	histone H3 [Drosophila melanogaster]	2	136	0.159	0.0271338	-2.6529	1.56649
NP_648622.1	CG11267	uncharacterized protein Dmel_CG11267 [Drosophila melanogaster]	9	103	0.191	0.0282354	-2.38836	1.54921
NP_651990.1	CG3719	CG3719 [Drosophila melanogaster]	1	160	0.455	0.0323079	-1.13606	1.49069
NP_651001.2	mRpL35	mitochondrial ribosomal protein L35 [Drosophila melanogaster]	1	178	0.402	0.0335671	-1.31473	1.47409
NP_724654.1	CG30373	uncharacterized protein Dmel_CG30373, isoform A [Drosophila melanogaster]	5	158	0.325	0.0346736	-1.62149	1.46
NP_610780.1	CG8520	CG8520, isoform A [Drosophila melanogaster]	9	458	0.475	0.0351737	-1.074	1.45378
NP_648064.1	CG10075	uncharacterized protein Dmel_CG10075 [Drosophila melanogaster]	6	259	0.327	0.036298	-1.61264	1.44012
NP_001285625.1	CG14022	uncharacterized protein Dmel_CG14022, isoform B [Drosophila melanogaster]	3	101	0.462	0.0374373	-1.11404	1.42669
NP_525073.1	mRpL30	mitochondrial ribosomal protein L30 [Drosophila melanogaster]	16	180	0.494	0.0375758	-1.01742	1.42509
NP_608445.2	CG1718	CG1718, isoform B [Drosophila melanogaster]	13	1714	0.496	0.0390061	-1.01159	1.40887
NP_732652.1	CG31343	uncharacterized protein Dmel_CG31343 [Drosophila melanogaster]	24	961	0.359	0.0396562	-1.47794	1.40169
NP_523785.2	mRpS28	mitochondrial ribosomal protein S28 [Drosophila melanogaster]	3	194	0.447	0.0469129	-1.16165	1.32871
NP_001259608.1	CG9921	CG9921, isoform B [Drosophila melanogaster]	3	102	0.429	0.0472014	-1.22095	1.32604
NP_610220.1	CG15908	uncharacterized protein Dmel_CG15908 [Drosophila melanogaster]	9	156	0.497	0.0482323	-1.00868	1.31666
NP_572212.1	TrxT	thioredoxin T, isoform A [Drosophila melanogaster]	2	157	14.131	4.46517e-05	3.82079	4.35016
NP_650333.1	CG9920	CG9920 [Drosophila melanogaster]	9	102	11.377	7.05589e-05	3.50805	4.15145
NP_001286040.1	Acp36DE	accessory gland protein 36DE, isoform B [Drosophila melanogaster]	55	912	24.275	7.24332e-05	4.6014	4.14006
NP_731489.2	pug	pugilist, isoform B [Drosophila melanogaster]	47	968	3.338	8.27937e-05	1.73898	4.082
NP_611133.1	CG7813	CG7813 [Drosophila melanogaster]	18	734	11.505	8.32022e-05	3.52419	4.07987
NP_524875.1	arg	arginase [Drosophila melanogaster]	11	351	2.526	0.000100955	1.33685	3.99587
NP_650042.2	CG4706	CG4706 [Drosophila melanogaster]	9	783	11.602	0.000103345	3.5363	3.98571
NP_610213.1	tomboy40	tomboy40 [Drosophila melanogaster]	4	340	6.313	0.000103618	2.65833	3.98456
NP_729446.1	Argk	arginine kinase, isoform A [Drosophila melanogaster]	8	562	2.985	0.000121825	1.57773	3.91426
NP_001260364.1	Porin2	Porin2, isoform B [Drosophila melanogaster]	13	293	13.47	0.000121967	3.75168	3.91376
NP_573114.2	CG9914	CG9914, isoform A [Drosophila melanogaster]	16	315	2.79	0.000141046	1.48027	3.85064
NP_648467.1	CG6140	CG6140, isoform A [Drosophila melanogaster]	10	470	5.899	0.000142907	2.56047	3.84495
NP_609805.1	CG17904	uncharacterized protein Dmel_CG17904 [Drosophila melanogaster]	2	311	2.356	0.000170944	1.23634	3.76715
NP_610892.1	S-Lap5	Sperm-Leucylaminopeptidase 5 [Drosophila melanogaster]	5	549	12.588	0.000207127	3.65398	3.68376
NP_001260509.1	Cyt-c-d	cytochrome c distal, isoform B [Drosophila melanogaster]	4	105	8.854	0.000216335	3.14633	3.66487
NP_787998.1	Akap200	A kinase anchor protein 200, isoform D [Drosophila melanogaster]	11	837	7.878	0.000217228	2.97783	3.66308
NP_608912.1	Cyp28d1	Cyp28d1 [Drosophila melanogaster]	26	502	2.294	0.000240372	1.19787	3.61912
NP_733183.1	CG31075	uncharacterized protein Dmel_CG31075, isoform A [Drosophila melanogaster]	18	485	2.767	0.000245796	1.46832	3.60942
NP_477258.1	Idgf1	imaginal disc growth factor 1 [Drosophila melanogaster]	10	439	2.719	0.000250384	1.44308	3.60139
NP_001246694.1	Hsp23	heat shock protein 23, isoform B [Drosophila melanogaster]	14	186	6.43	0.000264208	2.68482	3.57805
NP_524956.2	Spn38F	serpin 38F, isoform A [Drosophila melanogaster]	8	372	11.142	0.000276378	3.47794	3.5585
NP_609595.1	Vha68-3	vacuolar H[+] ATPase 68kD subunit 3 [Drosophila melanogaster]	4	743	3.037	0.000284657	1.60265	3.54568
NP_729966.1	CG7768	CG7768, isoform A [Drosophila melanogaster]	6	164	9.714	0.000344216	3.28007	3.46317
NP_524065.1	Fbp1	Fat body protein 1, isoform A [Drosophila melanogaster]	1	1029	7.729	0.000411569	2.95028	3.38556
NP_648394.1	S-Lap3	Sperm-Leucylaminopeptidase 3, isoform C [Drosophila melanogaster]	8	535	8.993	0.000425586	3.1688	3.37101
NP_569875.2	CG3699	CG3699 [Drosophila melanogaster]	15	251	2.875	0.000434648	1.52356	3.36186
NP_648068.1	CG10063	uncharacterized protein Dmel_CG10063 [Drosophila melanogaster]	8	212	11.062	0.00050257	3.46754	3.2988
NP_524474.1	Hsp68	heat shock protein 68 [Drosophila melanogaster]	20	635	16.776	0.000508396	4.06833	3.2938
NP_723104.2	Hsp60C	heat shock protein 60C, isoform A [Drosophila melanogaster]	26	576	10.883	0.000515281	3.444	3.28796
NP_610040.1	CG17472	uncharacterized protein Dmel_CG17472 [Drosophila melanogaster]	3	159	12.013	0.000528155	3.58652	3.27724
NP_611097.2	CG44243	uncharacterized protein Dmel_CG44243, isoform B [Drosophila melanogaster]	8	396	2.321	0.000533134	1.21475	3.27316
NP_001261474.1	ImpL3	Ecdysone-inducible gene L3, isoform B [Drosophila melanogaster]	4	332	2.792	0.000559789	1.4813	3.25198
NP_611002.3	Cyp6a20	Cyp6a20 [Drosophila melanogaster]	16	501	2.379	0.000562125	1.25036	3.25017
NP_477354.1	Hop	Hsp70/Hsp90 organizing protein [Drosophila melanogaster]	23	490	2.752	0.000637072	1.46048	3.19581
NP_647924.2	CG18418	uncharacterized protein Dmel_CG18418 [Drosophila melanogaster]	2	311	7.743	0.000650496	2.95289	3.18676
NP_650501.1	CG4546	CG4546 [Drosophila melanogaster]	11	457	9.704	0.000652936	3.27858	3.18513
NP_524290.2	betaTub85D	beta-Tubulin at 85D [Drosophila melanogaster]	6	446	5.699	0.000671876	2.51071	3.17271
NP_572408.2	CG10920	uncharacterized protein Dmel_CG10920 [Drosophila melanogaster]	3	397	7.907	0.000692771	2.98313	3.15941
NP_524611.1	Ef1alpha100E	elongation factor 1alpha100E, isoform A [Drosophila melanogaster]	11	462	2.741	0.000702492	1.4547	3.15336
NP_524057.2	SP	Sex peptide [Drosophila melanogaster]	1	55	4.554	0.000789081	2.18713	3.10288
NP_001027115.1	Hsp22	heat shock protein 22, isoform A [Drosophila melanogaster]	25	174	25.951	0.000836458	4.69772	3.07756
NP_651391.1	tobi	target of brain insulin [Drosophila melanogaster]	23	657	27.453	0.000848484	4.77889	3.07136
NP_610875.1	cbs	centrosomin's beautiful sister, isoform A [Drosophila melanogaster]	4	611	6.417	0.00106163	2.6819	2.97403
NP_660192.1	CG4098	CG4098 [Drosophila melanogaster]	3	307	5.354	0.00106621	2.42062	2.97216
NP_001285102.1	CG2145	CG2145, isoform B [Drosophila melanogaster]	15	592	2.983	0.00108159	1.57676	2.96594
NP_001162875.1	Rtnl1	Reticulon-like1, isoform H [Drosophila melanogaster]	24	607	5.375	0.00110419	2.42626	2.95696
NP_788898.1	Ant2	adenine nucleotide translocase 2, isoform B [Drosophila melanogaster]	3	307	6.372	0.00122279	2.67175	2.91265
NP_001286309.1	metro	menage a trois, isoform D [Drosophila melanogaster]	2	546	4.013	0.00127134	2.00468	2.89574
NP_648328.1	CG3408	CG3408, isoform A [Drosophila melanogaster]	4	331	8.247	0.00130153	3.04387	2.88554
NP_649086.2	CG6812	CG6812 [Drosophila melanogaster]	15	327	2.73	0.00131025	1.4489	2.88265
NP_651140.1	CG4434	CG4434 [Drosophila melanogaster]	9	535	5.334	0.00134267	2.41522	2.87203
NP_731600.1	Jupiter	jupiter, isoform B [Drosophila melanogaster]	4	185	7.324	0.00141648	2.87263	2.84879
NP_729394.1	S-Lap2	Sperm-Leucylaminopeptidase 2 [Drosophila melanogaster]	4	552	5.514	0.00152208	2.4631	2.81756
NP_650809.1	CG6255	CG6255 [Drosophila melanogaster]	3	342	32.978	0.00160541	5.04343	2.79441
NP_001285254.1	CG9509	CG9509, isoform B [Drosophila melanogaster]	28	646	3.542	0.00161384	1.82456	2.79214
NP_648615.1	CG10748	uncharacterized protein Dmel_CG10748 [Drosophila melanogaster]	4	349	4.625	0.00173536	2.20945	2.76061
NP_610384.1	Mal-A8	maltase A8 [Drosophila melanogaster]	14	588	7.975	0.00180885	2.99548	2.7426
NP_001286795.1	kcc	kazachoc, isoform G [Drosophila melanogaster]	2	1077	2.016	0.00185023	1.0115	2.73278
NP_651049.3	AP-2mu	adaptor protein complex 2, mu subunit, isoform B [Drosophila melanogaster]	12	437	2.113	0.0019433	1.07929	2.71146
NP_524174.1	fln	flightin, isoform A [Drosophila melanogaster]	19	182	3.346	0.0020542	1.74244	2.68736
NP_001138111.1	CG42235	uncharacterized protein Dmel_CG42235, isoform B [Drosophila melanogaster]	4	695	2.549	0.0020919	1.34993	2.67946
NP_728275.1	CG14207	uncharacterized protein Dmel_CG14207, isoform B [Drosophila melanogaster]	4	192	2.597	0.00213611	1.37685	2.67038
NP_001188515.1	PMCA	plasma membrane calcium ATPase, isoform P [Drosophila melanogaster]	4	1194	2.476	0.00225094	1.30801	2.64764
NP_524925.1	Hsp60B	heat shock protein 60B [Drosophila melanogaster]	13	648	10.469	0.00230451	3.38805	2.63742
NP_648759.1	CG6888	CG6888 [Drosophila melanogaster]	6	196	5.312	0.0023071	2.40926	2.63693
NP_001138085.1	CG4836	CG4836, isoform E [Drosophila melanogaster]	4	1224	7.879	0.00260452	2.97801	2.58427
NP_611134.1	loopin-1	loopin-1, isoform A [Drosophila melanogaster]	8	526	7.764	0.00263402	2.9568	2.57938
NP_001188694.1	Msp300	Muscle-specific protein 300 kDa, isoform D [Drosophila melanogaster]	105	12345	2.271	0.00282231	1.18333	2.5494
NP_001260514.1	Cyt-b5-r	cytochrome b5-related, isoform B [Drosophila melanogaster]	11	436	2.994	0.00283397	1.58207	2.5476
NP_001261019.1	Strn-Mlck	Stretchin-Mlck, isoform U [Drosophila melanogaster]	41	8255	2.868	0.00295359	1.52005	2.52965
NP_001097287.1	Dyb	dystrobrevin, isoform F [Drosophila melanogaster]	8	816	2.687	0.00306575	1.426	2.51346
NP_729528.2	CG6767	CG6767, isoform B [Drosophila melanogaster]	4	388	4.364	0.00307388	2.12565	2.51231
NP_572757.2	CG2025	CG2025 [Drosophila melanogaster]	6	1147	2.127	0.00309769	1.08882	2.50896
NP_001286991.1	CG13315	uncharacterized protein Dmel_CG13315, isoform B [Drosophila melanogaster]	3	69	2.42	0.00323878	1.27501	2.48962
NP_001245921.1	CG18304	uncharacterized protein Dmel_CG18304, isoform B [Drosophila melanogaster]	32	1819	2.946	0.00336665	1.55876	2.4728
NP_001246141.1	CG17508	uncharacterized protein Dmel_CG17508, isoform B [Drosophila melanogaster]	1	194	5.082	0.00344061	2.3454	2.46336
NP_001262895.1	Miro	mitochondrial Rho, isoform F [Drosophila melanogaster]	5	673	2.997	0.0035541	1.58352	2.44927
NP_648244.1	S-Lap1	Sperm-Leucylaminopeptidase 1 [Drosophila melanogaster]	4	555	5.984	0.0035743	2.58111	2.44681
NP_726111.1	Tango11	transport and golgi organization 11, isoform A [Drosophila melanogaster]	7	277	3.284	0.00386262	1.71545	2.41312
NP_001246631.1	axo	axotactin, isoform C [Drosophila melanogaster]	1	2179	4.191	0.00392077	2.06729	2.40663
NP_001260155.1	Liprin-alpha	Liprin-alpha, isoform E [Drosophila melanogaster]	17	1214	2.49	0.00392215	1.31615	2.40648
NP_001262783.1	Syp	syncrip, isoform Q [Drosophila melanogaster]	1	761	4.203	0.00392481	2.07142	2.40618
NP_001259660.1	beta-Spec	beta spectrin, isoform B [Drosophila melanogaster]	6	2308	3.044	0.00410469	1.60597	2.38672
NP_001036676.1	Cdep	Chondrocyte-derived ezrin-like domain containing protein, isoform E [Drosophila melanogaster]	6	1167	2.875	0.00419064	1.52356	2.37772
NP_001014681.2	Doa	darkener of apricot, isoform P [Drosophila melanogaster]	2	2045	4.476	0.00425458	2.16221	2.37114
NP_001261287.1	alpha-Spec	alpha spectrin, isoform C [Drosophila melanogaster]	240	2447	2.021	0.00428643	1.01507	2.3679
NP_001261020.1	Asph	aspartyl beta-hydroxylase, isoform L [Drosophila melanogaster]	8	991	2.561	0.00433021	1.35671	2.36349
NP_612023.1	ttm2	tiny tim 2 [Drosophila melanogaster]	1	409	3.556	0.00462455	1.83026	2.33493
NP_728257.2	l(1)G0156	lethal (1) G0156, isoform C [Drosophila melanogaster]	1	354	6.421	0.00463996	2.6828	2.33349
NP_611132.1	S-Lap8	Sperm-Leucylaminopeptidase 8 [Drosophila melanogaster]	5	534	4.975	0.00479056	2.3147	2.31961
NP_610107.1	CG8665	CG8665 [Drosophila melanogaster]	6	913	2.567	0.00482566	1.36008	2.31644
NP_610383.1	Mal-A7	maltase A7, isoform A [Drosophila melanogaster]	17	599	11.157	0.00495541	3.47988	2.30492
NP_523784.2	Pepck	phosphoenolpyruvate carboxykinase [Drosophila melanogaster]	12	647	2.583	0.0049893	1.36905	2.30196
NP_477464.1	Syt4	synaptotagmin 4 [Drosophila melanogaster]	4	474	2.857	0.00504986	1.5145	2.29672
NP_477401.2	Sbf	SET domain binding factor, isoform A [Drosophila melanogaster]	5	1993	3.205	0.00508903	1.68032	2.29336
NP_476819.2	AP-2alpha	adaptor protein complex 2, alpha subunit, isoform A [Drosophila melanogaster]	33	940	2.017	0.00532076	1.01221	2.27403
NP_610743.2	Cyp6g1	Cyp6g1, isoform A [Drosophila melanogaster]	12	524	2.911	0.00535103	1.54151	2.27156
NP_608978.2	Gal	beta galactosidase, isoform A [Drosophila melanogaster]	21	672	3.026	0.00571069	1.59741	2.24331
NP_649598.1	CG1208	CG1208, isoform B [Drosophila melanogaster]	3	496	3.065	0.00578782	1.61589	2.23749
NP_731505.1	fau	fau [Drosophila melanogaster]	7	131	3.401	0.00636226	1.76596	2.19639
NP_727519.1	dlg1	discs large 1, isoform F [Drosophila melanogaster]	17	816	3.671	0.00640032	1.87617	2.1938
NP_001246632.1	axo	axotactin, isoform D [Drosophila melanogaster]	1	2070	2.711	0.00653859	1.43883	2.18452
NP_651267.1	CG13623	uncharacterized protein Dmel_CG13623, isoform A [Drosophila melanogaster]	1	139	5.079	0.00684025	2.34454	2.16493
NP_001259083.1	CaMKII	Calcium/calmodulin-dependent protein kinase II, isoform L [Drosophila melanogaster]	3	522	3.088	0.00689891	1.62667	2.16122
NP_001285925.1	CG15293	uncharacterized protein Dmel_CG15293, isoform C [Drosophila melanogaster]	20	333	2.897	0.00705738	1.53456	2.15136
NP_722780.1	Tengl1	testis EndoG-Like 1 [Drosophila melanogaster]	3	319	7.321	0.00708738	2.87204	2.14951
NP_524060.2	Hml	hemolectin, isoform A [Drosophila melanogaster]	29	3843	2.817	0.00730279	1.49416	2.13651
NP_523509.2	Pvr	PDGF- and VEGF-receptor related, isoform A [Drosophila melanogaster]	1	1509	2.471	0.00736152	1.3051	2.13303
NP_524000.1	Hsp27	heat shock protein 27, isoform A [Drosophila melanogaster]	16	213	3.091	0.00753754	1.62807	2.12277
NP_572182.1	CG7024	CG7024 [Drosophila melanogaster]	3	479	10.341	0.00775048	3.3703	2.11067
NP_001261826.1	Fbp1	Fat body protein 1, isoform D [Drosophila melanogaster]	1	1027	4.809	0.00800476	2.26574	2.09665
NP_523791.2	cora	coracle, isoform A [Drosophila melanogaster]	1	1698	2.557	0.00837603	1.35445	2.07696
NP_524063.1	Hsc70-1	heat shock protein cognate 1, isoform A [Drosophila melanogaster]	17	641	2.358	0.00846155	1.23756	2.07255
NP_727109.2	CG4095	CG4095 [Drosophila melanogaster]	3	503	6.51	0.00858294	2.70266	2.06636
NP_001097249.1	TER94	TER94, isoform C [Drosophila melanogaster]	2	826	7.059	0.00866675	2.81946	2.06214
NP_001259282.1	CG34417	uncharacterized protein Dmel_CG34417, isoform T [Drosophila melanogaster]	89	5182	2.425	0.0087196	1.27798	2.0595
NP_609590.1	Pih1D1	Pih1D1, isoform A [Drosophila melanogaster]	3	335	3.192	0.00929512	1.67446	2.03174
NP_726038.1	Pu	punch, isoform A [Drosophila melanogaster]	10	324	2.096	0.00929592	1.06764	2.03171
NP_001246118.1	Dap160	dynamin associated protein 160, isoform D [Drosophila melanogaster]	23	1190	2.156	0.00956191	1.10836	2.01946
NP_001285556.1	Lsp1beta	larval serum protein 1 beta, isoform B [Drosophila melanogaster]	9	789	4.352	0.00968434	2.12168	2.01393
NP_725115.1	RpS11	ribosomal protein S11, isoform B [Drosophila melanogaster]	4	154	2.868	0.00972615	1.52005	2.01206
NP_650632.1	P5cr-2	Pyrroline-5-carboxylate reductase-like 2, isoform A [Drosophila melanogaster]	6	273	2.393	0.010171	1.25882	1.99263
NP_724679.2	Mal-A6	maltase A6, isoform D [Drosophila melanogaster]	18	601	10.848	0.0103576	3.43936	1.98474
NP_649756.2	CG2698	CG2698, isoform A [Drosophila melanogaster]	2	817	3.725	0.010372	1.89724	1.98414
NP_001246229.1	brp	bruchpilot, isoform K [Drosophila melanogaster]	1	1707	3.299	0.0109301	1.72203	1.96138
NP_610295.1	CG2137	CG2137 [Drosophila melanogaster]	1	713	6.15	0.0113388	2.62059	1.94543
NP_610309.1	CG2065	CG2065, isoform A [Drosophila melanogaster]	2	300	5.696	0.0124836	2.50995	1.90366
NP_650070.1	ninaG	ninaG, isoform A [Drosophila melanogaster]	2	597	2.787	0.012806	1.47871	1.89259
NP_524877.1	comt	comatose, isoform A [Drosophila melanogaster]	28	745	2.092	0.0130619	1.06488	1.884
NP_610900.1	S-Lap7	Sperm-Leucylaminopeptidase 7, isoform A [Drosophila melanogaster]	7	527	6.121	0.0131402	2.61377	1.8814
NP_476627.3	Mal-A1	maltase A1 [Drosophila melanogaster]	26	577	6.659	0.0138642	2.73531	1.8581
NP_729613.1	S-Lap4	Sperm-Leucylaminopeptidase 4 [Drosophila melanogaster]	12	524	3.685	0.0146919	1.88166	1.83292
NP_728408.3	CG1801	CG1801 [Drosophila melanogaster]	1	1655	3.411	0.0153668	1.77019	1.81342
NP_476768.1	trp	transient receptor potential, isoform A [Drosophila melanogaster]	41	1275	2.185	0.0154326	1.12763	1.81156
NP_726489.2	CG44247	uncharacterized protein Dmel_CG44247, isoform A [Drosophila melanogaster]	7	536	2.46	0.0157393	1.29866	1.80301
NP_001097706.1	CG17816	uncharacterized protein Dmel_CG17816, isoform G [Drosophila melanogaster]	4	882	2.896	0.0162344	1.53406	1.78956
NP_726482.1	Eps-15	epidermal growth factor receptor pathway substrate clone 15, isoform B [Drosophila melanogaster]	1	1232	2.735	0.0166252	1.45154	1.77923
NP_725339.1	shot	short stop, isoform H [Drosophila melanogaster]	37	8805	2.278	0.0166573	1.18777	1.7784
NP_726633.2	CaMKII	Calcium/calmodulin-dependent protein kinase II, isoform A [Drosophila melanogaster]	2	490	3.509	0.0174492	1.81106	1.75823
NP_001188695.1	Msp300	Muscle-specific protein 300 kDa, isoform G [Drosophila melanogaster]	12	13540	2.681	0.0175983	1.42277	1.75453
NP_730917.1	CG31538	uncharacterized protein Dmel_CG31538 [Drosophila melanogaster]	8	563	9.949	0.0177365	3.31455	1.75113
NP_729420.1	CG32026	uncharacterized protein Dmel_CG32026 [Drosophila melanogaster]	3	719	21.003	0.0190426	4.39252	1.72027
NP_728910.1	mge	maggie, isoform B [Drosophila melanogaster]	1	122	4.004	0.0194408	2.00144	1.71129
NP_001162632.2	futsch	futsch, isoform E [Drosophila melanogaster]	107	5495	2.665	0.0211842	1.41414	1.67399
NP_524400.2	P5cr	pyrroline 5-carboyxlate reductase [Drosophila melanogaster]	2	280	2.294	0.0217517	1.19787	1.66251
NP_001163769.1	Vha100-1	vacuolar H[+] ATPase 100kD subunit 1, isoform J [Drosophila melanogaster]	3	852	2.095	0.0234316	1.06695	1.6302
NP_001245922.1	uif	uninflatable, isoform D [Drosophila melanogaster]	32	3589	2.232	0.0235101	1.15834	1.62874
NP_001014491.1	ref(2)P	refractory to sigma P, isoform B [Drosophila melanogaster]	13	599	2.94	0.0235449	1.55582	1.6281
NP_611095.1	clu	clueless, isoform A [Drosophila melanogaster]	21	1448	2.166	0.0236137	1.11503	1.62684
NP_730954.2	CRMP	collapsin response mediator protein, isoform E [Drosophila melanogaster]	1	594	2.173	0.0240117	1.11969	1.61958
NP_001246230.1	brp	bruchpilot, isoform L [Drosophila melanogaster]	1	1781	2.723	0.024333	1.4452	1.6138
NP_001261364.1	ZnT63C	zinc transporter 63C, isoform F [Drosophila melanogaster]	2	545	2.419	0.0275256	1.27441	1.56026
NP_724496.1	Eb1	Eb1, isoform A [Drosophila melanogaster]	5	291	2.163	0.0282693	1.11303	1.54868
NP_732958.1	Slimp	Seryl-tRNA synthetase-like insect mitochondrial protein [Drosophila melanogaster]	3	464	2.06	0.0287115	1.04264	1.54194
NP_523460.2	Syt1	synaptotagmin 1, isoform A [Drosophila melanogaster]	3	474	3.811	0.029004	1.93017	1.53754
NP_611142.3	CG5089	CG5089 [Drosophila melanogaster]	9	436	6.923	0.0291432	2.7914	1.53546
NP_724664.1	CG30376	uncharacterized protein Dmel_CG30376 [Drosophila melanogaster]	4	226	6.093	0.0292287	2.60715	1.53419
NP_001246228.1	brp	bruchpilot, isoform J [Drosophila melanogaster]	1	2238	2.507	0.0299385	1.32596	1.52377
[truncated: 1,339 more rows]
