# Supplementary material for: Loss of Drosophila Clueless differentially affects the mitochondrial proteome compared to loss of Sod2 and Pink1
Source: Front Physiol. 2022 Oct 26;13:1004099. doi: 10.3389/fphys.2022.1004099 (PMC9644064; doi:10.3389/fphys.2022.1004099)
Supplement: Supplementary file 3 [file Table6.XLSX]

## Sheet: STRING-less abundant proteins
# Candidate proteins from STRING clusters from less abundant proteins in clu and Pink1 mutants
mito-respiration cluster in clu mutants				mito-translation cluster in clu mutants				mito-translation cluster in Pink1 mutants
#Complex I
Proteins	Fold Changes	p-Values		Proteins	Fold Changes	p-Values		Proteins	Fold Changes	p-Values
ND-19	0.074	0.000184117		mRpS16	0.049	0.0239663		mRpS16	0.049	0.0240453
ND-B15	0.086	0.0176843		mRpL12	0.168	0.0446606		mRpL46	0.215	0.00646457
ND-PDSW	0.104	0.000477752		mRpS22	0.205	0.0451386		mRpL32	0.305	0.00709893
ND-SGDH	0.114	0.0366504		mRpL46	0.206	0.00571616		mRpS25	0.323	0.0026584
ND-ASHI	0.124	0.000143341		mRpL32	0.288	0.00574339		mRpL48	0.342	0.020013
ND-13B	0.133	0.00726278		mRpL48	0.306	0.013278		mRpL44	0.346	0.0075386
ND-B17.2	0.146	0.00508026		mRpL44	0.311	0.00488973		mRpS29	0.35	0.0208137
ND-B22	0.161	0.0134318		mRpS25	0.313	0.00232717		mRpL43	0.393	0.000542765
ND-13A	0.164	0.0188585		mRpS28	0.323	0.0118172		mRpL35	0.402	0.0335671
ND-23	0.173	0.0014968		mRpS35	0.331	0.00105004		mRpL47	0.403	0.00232729
ND-B14.5A	0.179	0.000646649		mRpS29	0.332	0.0169879		mRpS26	0.408	0.00804994
ND-42	0.199	7.18694e-06		mRpL28	0.341	0.0010394		mRpS6	0.415	0.00280438
ND-30	0.225	0.00360155		mRpS26	0.365	0.00475513		mRpS35	0.428	0.00359686
ND-B16.6	0.229	0.0109516		mRpS9	0.387	0.00759801		mRpS7	0.432	0.00200153
ND-B17	0.251	0.00580341		mRpS7	0.39	0.00115285		mRpS18C	0.439	0.0185755
ND-15	0.264	0.00601531		mRpL47	0.394	0.00207354		mRpS28	0.447	0.0469129
ND-AGGG	0.267	0.00382403		mRpS6	0.404	0.00244799		mRpS9	0.459	0.0177782
ND-39	0.292	0.000357137		mRpS18C	0.409	0.0130911		mRpS11	0.47	0.00424669
ND-24	0.294	0.00117586		mRpL51	0.415	0.00841736		mRpL54	0.483	0.000102019
ND-51	0.303	0.000342986		mRpL43	0.416	0.000733462		mRpS2	0.491	0.000878319
ND-B12	0.305	0.015258		mRpS17	0.433	0.00103683		mRpL30	0.494	0.0375758
ND-49	0.319	0.00253638		mRpS5	0.446	0.0123276		mRpS17	0.496	0.00239021
ND-20	0.332	5.18296e-05		mRpS2	0.452	0.000522919
ND-75	0.335	0.0010603		mRpL49	0.453	0.000650092
ND-18	0.354	0.0294422		mRpL30	0.455	0.0240387
ND-MNLL	0.423	0.0294016		mRpS23	0.474	0.000866819
ND-ACP	0.433	0.00079613		mRpS18A	0.477	0.0115922
#Complex III				mRpL14	0.481	0.00189858
UQCR-Q	0.106	0.00193293		mRpL50	0.483	0.00472049
UQCR-14	0.18	0.00141794
Cyt-c1	0.227	0.000918929
UQCR-C1	0.247	0.000227223
UQCR-C2	0.3	0.00116893
UQCR-6.4	0.384	8.33561e-05
Cyt-c-p	0.436	0.00676695
#Complex IV
levy	0.142	0.000215627
COX4	0.165	0.000966151
ND-MLRQ	0.195	0.00740138
COX5A	0.211	0.00299678
COX5B	0.251	0.0123321
cype	0.287	0.00280448
COX6B	0.313	0.0271445
COX7A	0.471	0.00376814
#Complex V
ATPsynCF6	0.131	0.0266181
ATPsynF	0.158	0.0220699
sun	0.211	0.0195448
ATPsynE	0.221	0.0283388
ATPsynD	0.267	0.00147729
ATPsyndelta	0.28	0.00090644
blw	0.406	0.00131045
ATPsynG	0.461	0.00590698

## Sheet: STRING-more abundant proteins
# Candidate proteins from STRING clusters from more abundant proteins in clu, Sod2 and Pink1 mutants
Cytoskeltal and vesicle transport cluster in clu mutants						metabolism, protein folding and degradation cluster in clu, Sod2 and Pink1 mutants
						#Clu				#Sod2				#Pink1
Proteins	Fold Changes	p-Values				Proteins	Fold Changes	p-Values		Proteins	Fold Changes	p-Values		Proteins	Fold Changes	p-Values
alphaTub85E	8.628	0.0236731				Hsp22	52.037	0.000329643		CG6255	17.523	0.00403881		S-Lap5	12.588	0.000207127
betaTub56D	4.173	0.000388377				CG4836	18.133	0.000525308		CG32026	16.876	0.0247641		CG7813	11.505	8.32022e-05
dlg1	4.151	0.00426621				CG32026	11.272	0.0419224		CG31538	12.283	0.0122255		CG9920	11.377	7.05589e-05
betaTub85D	4.15	0.00174096				loopin-1	9.962	0.00154316		CG9920	8.259	0.000147106		Hsp60C	10.883	0.000515281
Syt1	3.978	0.0255341				S-Lap3	9.439	0.000382972		CG4706	8.033	0.000236826		Hsp60B	10.469	0.00230451
Chc	3.936	0.000748274				Hsp68	9.026	0.00165184		Hsp60C	7.851	0.00103954		CG4546	9.704	0.000652936
alphaTub84B	3.849	0.00602894				CG5089	8.656	0.0186586		CG30376	7.778	0.0173982		S-Lap3	8.993	0.000425586
betaTub60D	3.4	0.0133167				Hsp23	7.116	0.000202948		Hsp60B	7.294	0.00495303		CG4836	7.879	0.00260452
beta-Spec	3.322	0.00290681				Hsp60B	7.056	0.00534396		S-Lap5	6.889	0.000775617		CG5089	6.923	0.0291432
brp	2.952	0.0152887				Pepck	6.93	0.000168325		loopin-1	6.328	0.00426494		S-Lap7	6.121	0.0131402
gammaCOP	2.936	0.0103905				S-Lap5	6.606	0.000861102		CG4546	5.829	0.00216513		S-Lap1	5.984	0.0035743
betaTub97EF	2.819	0.000503689				S-Lap1	6.569	0.00282936		S-Lap1	5.138	0.00535248		S-Lap2	5.514	0.00152208
Calx	2.75	8.78027e-05				S-Lap8	6.362	0.0024948		S-Lap7	4.972	0.0218991		CG6888	5.312	0.0023071
shi	2.743	0.00372764				S-Lap7	6.331	0.0121369		S-Lap2	4.11	0.00365346		S-Lap8	4.975	0.00479056
shot	2.733	0.00702135				Hsp60C	6.297	0.00177107		S-Lap3	4.079	0.00348623		S-Lap4	3.685	0.0146919
futsch	2.708	0.0198172				CG9920	5.982	0.000336486		CG6140	3.771	0.000597905		P5cr-2	2.393	0.010171
Ank	2.677	3.93076e-05				CG7024	5.684	0.0271287		S-Lap8	3.201	0.0193949
AP-1-2beta	2.363	0.0317943				CG4546	5.101	0.00311508		Spat	3.08	0.0279202
Klc	2.319	0.000299878				S-Lap2	4.728	0.00236449		CG4434	3.021	0.00892003
Drp1	2.282	0.00618727				S-Lap4	4.436	0.00827192		S-Lap4	2.758	0.0406987
alpha-Spec	2.281	0.00206808				ImpL3	3.661	0.000177625		ImpL3	2.672	0.000690519
Miro	2.276	0.012801				Spat	3.321	0.0214614		P5cr-2	2.156	0.0174872
AP-2alpha	2.222	0.00295652				P5cr-2	3.13	0.0030528		P5cr	2.015	0.0426644
Khc	2.12	0.00657237				Hsp27	3.103	0.00742344
Khc	2.12	0.00657237				Hsc70-1	2.818	0.00362417
Src64B	2.072	0.00197138				PyK	2.169	0.0136262
