# Supplementary material for: Loss of Drosophila Clueless differentially affects the mitochondrial proteome compared to loss of Sod2 and Pink1
Source: Front Physiol. 2022 Oct 26;13:1004099. doi: 10.3389/fphys.2022.1004099 (PMC9644064; doi:10.3389/fphys.2022.1004099)
Supplement: Supplementary file 4 [file Table4.XLSX]

## Sheet: Sheet1
	Panther Protein Class (PC) ontology classification of less and more abundant proteins in clu, Sod2 and Pink1 mutants
Less abundant Proteins in clu						Less abundant Proteins in Sod2						Less abundant Proteins in Pink1
Sl#	Category name (Accession)	# genes	Percent of gene hit against total # genes	Percent of gene hit against total # Protein Class hits		Sl#	Category name (Accession)	# genes	Percent of gene hit against total # genes	Percent of gene hit against total # Protein Class hits		Sl#	Category name (Accession)	# genes	Percent of gene hit against total # genes	Percent of gene hit against total # Protein Class hits
1	metabolite interconversion enzyme (PC00262)	43	0.361	0.417		1	metabolite interconversion enzyme (PC00262)	11	0.333	0.407		1	translational protein (PC00263)	22	0.423	0.512
2	translational protein (PC00263)	31	0.261	0.301		2	transporter (PC00227)	3	0.091	0.111		2	metabolite interconversion enzyme (PC00262)	8	0.154	0.186
3	transporter (PC00227)	13	0.109	0.126		3	translational protein (PC00263)	3	0.091	0.111		3	DNA metabolism protein (PC00009)	4	0.077	0.093
4	cytoskeletal protein (PC00085)	3	0.025	0.029		4	DNA metabolism protein (PC00009)	2	0.061	0.074		4	transporter (PC00227)	2	0.038	0.047
5	protein modifying enzyme (PC00260)	2	0.017	0.019		5	protein-binding activity modulator (PC00095)	2	0.061	0.074		5	protein-binding activity modulator (PC00095)	2	0.038	0.047
6	chaperone (PC00072)	2	0.017	0.019		6	transfer/carrier protein (PC00219)	2	0.061	0.074		6	chromatin/chromatin-binding, or -regulatory protein (PC00077)	2	0.038	0.047
7	DNA metabolism protein (PC00009)	2	0.017	0.019		7	cytoskeletal protein (PC00085)	2	0.061	0.074		7	chaperone (PC00072)	1	0.019	0.023
8	transfer/carrier protein (PC00219)	2	0.017	0.019		8	protein modifying enzyme (PC00260)	1	0.03	0.037		8	RNA metabolism protein (PC00031)	1	0.019	0.023
9	protein-binding activity modulator (PC00095)	1	0.008	0.01		9	defense/immunity protein (PC00090)	1	0.03	0.037		9	cytoskeletal protein (PC00085)	1	0.019	0.023
10	transmembrane signal receptor (PC00197)	1	0.008	0.01
11	RNA metabolism protein (PC00031)	1	0.008	0.01
12	gene-specific transcriptional regulator (PC00264)	1	0.008	0.01
13	chromatin/chromatin-binding, or -regulatory protein (PC00077)	1	0.008	0.01
More abundant Proteins in clu						More abundant Proteins in Sod2						More abundant Proteins in Pink1
Sl#	Category name (Accession)	# genes	Percent of gene hit against total # genes	Percent of gene hit against total # Protein Class hits		Sl#	Category name (Accession)	# genes	Percent of gene hit against total # genes	Percent of gene hit against total # Protein Class hits		Sl#	Category name (Accession)	# genes	Percent of gene hit against total # genes	Percent of gene hit against total # Protein Class hits
1	metabolite interconversion enzyme (PC00262)	22	0.129	0.167		1	cytoskeletal protein (PC00085)	19	0.142	0.179		1	metabolite interconversion enzyme (PC00262)	24	0.211	0.264
2	protein modifying enzyme (PC00260)	19	0.112	0.144		2	metabolite interconversion enzyme (PC00262)	19	0.142	0.179		2	protein modifying enzyme (PC00260)	15	0.132	0.165
3	cytoskeletal protein (PC00085)	18	0.106	0.136		3	protein modifying enzyme (PC00260)	17	0.127	0.16		3	transporter (PC00227)	10	0.088	0.11
4	transporter (PC00227)	16	0.094	0.121		4	membrane traffic protein (PC00150)	9	0.067	0.085		4	membrane traffic protein (PC00150)	9	0.079	0.099
5	membrane traffic protein (PC00150)	13	0.076	0.098		5	transporter (PC00227)	8	0.06	0.075		5	cytoskeletal protein (PC00085)	9	0.079	0.099
6	scaffold/adaptor protein (PC00226)	10	0.059	0.076		6	scaffold/adaptor protein (PC00226)	6	0.045	0.057		6	chaperone (PC00072)	6	0.053	0.066
7	chaperone (PC00072)	7	0.041	0.053		7	protein-binding activity modulator (PC00095)	4	0.03	0.038		7	scaffold/adaptor protein (PC00226)	4	0.035	0.044
8	cell adhesion molecule (PC00069)	5	0.029	0.038		8	RNA metabolism protein (PC00031)	4	0.03	0.038		8	protein-binding activity modulator (PC00095)	3	0.026	0.033
9	translational protein (PC00263)	5	0.029	0.038		9	chaperone (PC00072)	4	0.03	0.038		9	translational protein (PC00263)	3	0.026	0.033
10	RNA metabolism protein (PC00031)	4	0.024	0.03		10	translational protein (PC00263)	3	0.022	0.028		10	gene-specific transcriptional regulator (PC00264)	2	0.018	0.022
11	protein-binding activity modulator (PC00095)	3	0.018	0.023		11	structural protein (PC00211)	3	0.022	0.028		11	cell adhesion molecule (PC00069)	1	0.009	0.011
12	structural protein (PC00211)	3	0.018	0.023		12	cell adhesion molecule (PC00069)	2	0.015	0.019		12	transfer/carrier protein (PC00219)	1	0.009	0.011
13	transfer/carrier protein (PC00219)	2	0.012	0.015		13	gene-specific transcriptional regulator (PC00264)	2	0.015	0.019		13	transmembrane signal receptor (PC00197)	1	0.009	0.011
14	transmembrane signal receptor (PC00197)	2	0.012	0.015		14	transmembrane signal receptor (PC00197)	2	0.015	0.019		14	RNA metabolism protein (PC00031)	1	0.009	0.011
15	DNA metabolism protein (PC00009)	1	0.006	0.008		15	extracellular matrix protein (PC00102)	1	0.007	0.009		1	structural protein (PC00211)	1	0.009	0.011
16	intercellular signal molecule (PC00207)	1	0.006	0.008		16	DNA metabolism protein (PC00009)	1	0.007	0.009		16	extracellular matrix protein (PC00102)	1	0.009	0.011
17	gene-specific transcriptional regulator (PC00264)	1	0.006	0.008		17	intercellular signal molecule (PC00207)	1	0.007	0.009
						18	transfer/carrier protein (PC00219)	1	0.007	0.009
