# Supplementary material for: Loss of Drosophila Clueless differentially affects the mitochondrial proteome compared to loss of Sod2 and Pink1
Source: Front Physiol. 2022 Oct 26;13:1004099. doi: 10.3389/fphys.2022.1004099 (PMC9644064; doi:10.3389/fphys.2022.1004099)
Supplement: Supplementary file 5 [file Table1.XLSX]

## Sheet: Proteins
# Original TMT mass spectrometry data from wild type (F), clu (D), Sod2 (SD) and Pink1 (PK) mutant flies
Checked	Protein FDR Confidence: Combined	Master	Accession	Description	Exp. q-value: Combined	Sum PEP Score	Coverage [%]	# Peptides	# PSMs	# Unique Peptides	# Protein Groups	# AAs	MW [kDa]	calc. pI	Score Mascot: Mascot	# Peptides (by Search Engine): Mascot	Abundance Ratio: (D) / (F)	Abundance Ratio: (SD) / (F)	Abundance Ratio: (PK) / (F)	Abundance Ratio Adj. P-Value: (D) / (F)	Abundance Ratio Adj. P-Value: (SD) / (F)	Abundance Ratio Adj. P-Value: (PK) / (F)	Abundances (Grouped): F	Abundances (Grouped): SD	Abundances (Grouped): D	Abundances (Grouped): PK	Abundances (Grouped) CV [%]: F	Abundances (Grouped) CV [%]: SD	Abundances (Grouped) CV [%]: D	Abundances (Grouped) CV [%]: PK	Found in Sample: [S1] F1: 126, Control, Rep1, F	Found in Sample: [S6] F1: 129N, Control, Rep2, F	Found in Sample: [S2] F1: 127N, Sample, Rep1, SD	Found in Sample: [S8] F1: 130N, Sample, Rep2, SD	Found in Sample: [S3] F1: 127C, Sample, Rep2, D	Found in Sample: [S4] F1: 128N, Sample, Rep1, D	Found in Sample: [S5] F1: 128C, Sample, Rep1, PK	Found in Sample: [S9] F1: 130C, Sample, Rep2, PK
FALSE	High	Master Protein	NP_611250.1	uncharacterized protein Dmel_CG10934 [Drosophila melanogaster]	0.004	7.77	7	1	4	1	1	194	22.3	9.22	162	1	100	100	100					109.4	128.9	252.3		7.34	23.75	3.71	High	High	High	High	High	High	High	High
FALSE	Medium	Master Protein	NP_648764.1	CG7804, isoform A [Drosophila melanogaster]	0.031	3.226	4	1	1	1	1	318	36.5	7.31	27	1	100	100	100					94.3	91.6	270.2		37.24	29.64	56.85	Not Found	Not Found	High	High	High	High	High	High
FALSE	Medium	Master Protein	NP_725837.1	vacuolar H[+] ATPase 100kD subunit 3 [Drosophila melanogaster]	0.019	3.792	1	1	1	1	1	904	104.3	7.37	65	1	100	100	100					129.6	155.6	212.2		39.78	33.39	16.55	Not Found	Not Found	High	High	High	High	High	High
FALSE	High	Master Protein	NP_651811.1	regulatory particle triple-A ATPase 6-related [Drosophila melanogaster]	0	32.715	23	8	19	1	1	399	45.1	7.97	363	8	100	100	100					137.2	120.8	242		44.45	26.55	22.64	Not Found	Not Found	High	High	High	High	High	High
FALSE	High	Master Protein	NP_610848.1	CG4646, isoform A [Drosophila melanogaster]	0.002	11.084	14	2	3	2	1	163	18.6	4.96	85	2	100	100	100					157.9	167.5	170.9		19.74	13.73	7.4	High	High	High	High	High	High	High	High
FALSE	High	Master Protein	NP_001027115.1	heat shock protein 22, isoform A [Drosophila melanogaster]	0	221.795	79	25	202	25	1	174	19.8	5.27	4309	25	52.037	2.149	25.951	0.0167214	0.481877	0.0282519	6.1	13	315.9	157.5	27.72	49.21	1.94	38.49	High	High	High	High	High	High	High	High
FALSE	Medium	Master Protein	NP_652636.2	lectin-28C, isoform B [Drosophila melanogaster]	0.022	3.567	4	1	2	1	1	265	29.9	5.85	0	1	49.467	0.384	0.615				9.5	3.7	471.7	5.9			3.76		High	High	Not Found	High	High	High	High	High
FALSE	High	Master Protein	NP_651648.5	uncharacterized protein Dmel_CG11828 [Drosophila melanogaster]	0.005	6.924	5	2	2	2	1	458	52.2	7.17	45	2	42.645	39.61	100	0.238784	0.291887	0.188492	2.7	106.9	115	275.4	132.52	1.56	2.39	23.5	High	High	High	High	High	High	High	High
FALSE	Medium	Master Protein	NP_649696.1	uncharacterized protein Dmel_CG31248, isoform A [Drosophila melanogaster]	0.038	2.779	4	1	1	1	1	251	28.8	6.55	19	1	30.085	26.558	27.437				5.8	153.3	173.7	158.4		35.59	30.45	17.18	Not Found	High	High	High	High	High	High	High
FALSE	High	Master Protein	NP_523868.1	larval serum protein 1 gamma [Drosophila melanogaster]	0	152.055	29	26	81	25	1	772	93.3	5.44	1418	26	24.199	8.075	9.332	0.0167214	0.0356249	0.0369737	11.5	92.5	277.1	106.9	5.12	30.39	21.69	37.69	High	High	High	High	High	High	High	High
FALSE	High	Master Protein	NP_612014.2	uncharacterized protein Dmel_CG13877, isoform B [Drosophila melanogaster]	0.002	11.347	9	1	3	1	1	108	11.9	5.91	103	1	21.871	15.071	13.516	0.0445404	0.079577	0.091633	9.1	137.8	199.9	123.6	79.53	57.01	2.49	0.2	High	High	High	High	High	High	High	High
FALSE	High	Master Protein	NP_612107.1	FucTD [Drosophila melanogaster]	0.006	6.15	4	2	4	2	1	447	51.6	7.68	65	2	20.542	12.872	28.099	0.0149001	0.0224811	0.018086	7.7	99.4	158.6	217	3.64	17.28	7.47	19.74	High	High	High	High	High	High	High	High
FALSE	High	Master Protein	NP_001285556.1	larval serum protein 1 beta, isoform B [Drosophila melanogaster]	0	37.896	12	10	17	9	1	789	95.8	5.64	331	10	19.994	9.303	4.352	0.017315	0.0355254	0.0694318	14	129.9	279.3	60.8	8.29	45.24	25.49	5.71	High	High	High	High	High	High	High	High
FALSE	High	Master Protein	NP_001138085.1	CG4836, isoform E [Drosophila melanogaster]	0.002	14.053	4	4	6	4	1	1224	133.1	8.98	108	4	18.133	8.694	7.879	0.0192319	0.0356249	0.0437391	13.6	118	246.2	107	7.32	29.38	45.96	1.46	High	High	High	High	High	High	High	High
FALSE	High	Master Protein	NP_608406.1	CG1324, isoform A [Drosophila melanogaster]	0	19.475	36	5	11	5	1	292	33.2	5.12	230	5	17.227	24.466	51.496	0.0355588	0.0367979	0.0328901	5.3	128.6	90.6	270.7	0.57	55.06	17.15	5.56	High	High	High	High	High	High	High	High
FALSE	High	Master Protein	NP_652377.1	uncharacterized protein Dmel_CG12853 [Drosophila melanogaster]	0	22.597	54	2	9	2	1	54	5.3	10.13	139	2	15.404	2.168	45.466	0.0609045	0.851467	0.0469802	7.7	16.6	118	348.3	72.95	16.56	16.37	37.58	High	High	High	High	High	High	High	High
FALSE	Low	Master Protein	NP_523474.1	chorion factor 2, isoform A [Drosophila melanogaster]	0.062	2.181	2	1	1	1	1	510	56.7	7.52	35	1	14.919	19.104	13.918	0.0218385	0.0275601	0.0316759	9.3	177.7	138.8	129.5	29.42	25.4	20.82	6.59	High	High	High	High	High	High	High	High
FALSE	High	Master Protein	NP_573137.1	CG9782 [Drosophila melanogaster]	0	34.874	35	6	17	6	1	226	24.1	8.72	545	6	13.513	18.165	11.075	0.0259897	0.0356249	0.0494032	11.1	201.9	150.2	123.1	28.55	40.84	1.14	44.5	High	High	High	High	High	High	High	High
FALSE	High	Master Protein	NP_523961.1	cytochrome P450-4d8 [Drosophila melanogaster]	0.005	6.931	2	1	2	1	1	463	53.3	7.99	69	1	13.356	10.171	20.513	0.0653917	0.105517	0.0687204	11.1	112.8	148.1	227.5	42.54	62.78	19.44	17.52	High	High	High	High	High	High	High	High
FALSE	High	Master Protein	NP_650809.1	CG6255 [Drosophila melanogaster]	0	16.998	12	4	18	3	1	342	35.8	9.36	232	4	13.258	17.523	32.978	0.0395376	0.041369	0.0368497	7.6	133.3	100.9	250.9	58.63	1.12	30.54	15.47	High	High	High	High	High	High	High	High
FALSE	High	Master Protein	NP_524065.1	Fat body protein 1, isoform A [Drosophila melanogaster]	0	441.071	49	66	437	1	1	1029	119.6	6.47	12322	66	13.023	7.248	7.729	0.0153388	0.0235235	0.0238667	16.7	121.4	218.1	129.4	20.38	5.84	25.89	16.4	High	High	High	High	High	High	High	High
FALSE	High	Master Protein	NP_649705.2	CG1288, isoform A [Drosophila melanogaster]	0	20.001	26	5	14	5	1	187	21.6	6.68	168	5	12.274	13.417	28.847	0.0149001	0.0224811	0.018086	8.9	118.8	108.7	255.5	3.31	17.51	7.13	8.34	High	High	High	High	High	High	High	High
FALSE	High	Master Protein	NP_650062.1	SCP-containing protein A [Drosophila melanogaster]	0	55.075	29	10	39	10	1	264	29.5	6.29	704	10	12.234	6.375	14.79	0.0149001	0.0224811	0.018086	14.1	90	172.7	208.7	24.85	2.66	3.88	16.46	High	High	High	High	High	High	High	High
FALSE	Medium	Master Protein	NP_001261687.1	ninjurin A, isoform D [Drosophila melanogaster]	0.019	3.808	19	2	3	2	1	225	24.1	7.05	32	2	12.036	10.881	6.607	0.0257168	0.0373747	0.068188	15.6	170.2	188.2	103.3	58.38	5.59	3.35	17.19	High	High	High	High	High	High	High	High
FALSE	High	Master Protein	NP_649085.1	CG3797, isoform A [Drosophila melanogaster]	0.005	7.047	3	3	6	2	1	636	71.2	7.18	51	3	11.958	15.933	18.271	0.0277414	0.0356249	0.035846	10.2	161.9	121.5	185.6	9.28	21.68	2.96	48.57	High	High	High	High	High	High	High	High
FALSE	High	Master Protein	NP_001260199.1	CG6055, isoform B [Drosophila melanogaster]	0.002	13.689	23	5	16	4	1	219	24.9	8.15	403	5	11.758	9.787	4.157	0.0149001	0.0224811	0.0328901	17.9	175.5	210.9	74.6	30.13	0.04	3.27	11.57	High	High	High	High	High	High	High	High
FALSE	High	Master Protein	NP_523527.1	cytochrome P450-4e3 [Drosophila melanogaster]	0	102.754	40	19	58	14	1	526	60.8	8.53	1498	19	11.452	7.59	3.28	0.0218385	0.0356249	0.106381	20.5	155.7	235	67.3	21.62	19.62	5.44	42.73	High	High	High	High	High	High	High	High
FALSE	High	Master Protein	NP_651681.2	uncharacterized protein Dmel_CG14515 [Drosophila melanogaster]	0.002	9.487	15	2	5	2	1	168	18.9	8.02	141	2	11.277	13.602	5.864	0.0218385	0.0320644	0.0627461	15.4	209.2	173.5	90.2	13.66	41.4	2.99	40.34	High	High	High	High	High	High	High	High
FALSE	High	Master Protein	NP_729420.1	uncharacterized protein Dmel_CG32026 [Drosophila melanogaster]	0.002	13.018	6	4	11	3	1	719	77.8	9.74	183	4	11.272	16.876	21.003	0.119699	0.105752	0.0954604	9.8	164.7	110	205	83.79	5.01	34.95	9.22	High	High	High	High	High	High	High	High
FALSE	High	Master Protein	NP_611771.1	ribosomal protein L22-like [Drosophila melanogaster]	0	34.344	21	9	17	9	1	312	34.3	10.01	446	9	11.053	13.099	30.525	0.0612642	0.0680216	0.0461673	8.9	116.5	98.3	271.5	35.89	7.28	22.05	2.9	High	High	High	High	High	High	High	High
FALSE	High	Master Protein	NP_572186.1	CG2871 [Drosophila melanogaster]	0	22.99	31	5	10	5	1	408	46.8	4.81	344	5	11.011	10.391	15.468				13.2	136.7	144.9	203.5		12.5	16.87	7.58	High	High	High	High	High	High	High	High
FALSE	High	Master Protein	NP_730917.1	uncharacterized protein Dmel_CG31538 [Drosophila melanogaster]	0	34.58	20	8	14	8	1	563	63.8	9.82	269	8	10.86	12.283	9.949	0.0620645	0.0722551	0.0916857	14.1	173	152.9	140.1	0.72	52.32	18.6	67.95	High	High	High	High	High	High	High	High
FALSE	High	Master Protein	NP_651592.2	milkah [Drosophila melanogaster]	0	26.547	23	10	17	10	1	283	33.2	4.67	204	10	10.35	8.641	26.024	0.0167214	0.0224811	0.018086	10.6	91.9	110.1	276.8	7.91	14.09	16.62	15.51	High	High	High	High	High	High	High	High
FALSE	High	Master Protein	NP_652283.1	uncharacterized protein Dmel_CG11458 [Drosophila melanogaster]	0	32.781	58	5	36	5	1	98	8.1	11.43	1170	5	10.14	8.658	6.259	0.0619407	0.095063	0.144854	18.3	158	185.1	114.2	12.27	56.76	2.03	55.93	High	High	High	High	High	High	High	High
FALSE	High	Master Protein	NP_788013.1	uncharacterized protein Dmel_CG32985 [Drosophila melanogaster]	0.002	12.303	4	3	5	2	1	618	72.5	6.27	138	3	10.053	8.975	19.53	0.0842227	0.121073	0.0660678	12.1	108.7	121.8	236.6	4.95	42.9	24.16	42.96	High	High	High	High	High	High	High	High
FALSE	High	Master Protein	NP_611134.1	loopin-1, isoform A [Drosophila melanogaster]	0	50.161	21	10	37	8	1	526	56.7	8.87	1077	10	9.962	6.328	7.764	0.0218385	0.0422565	0.0438987	19	119.9	188.8	147.2	33	10.22	24.05	28.95	High	High	High	High	High	High	High	High
FALSE	Low	Master Protein	NP_729198.1	uncharacterized protein Dmel_CG32388 [Drosophila melanogaster]	0.093	1.612	10	1	3	1	1	79	8.6	10.05	62	1	9.946	17.383	36.962	0.129875	0.0941933	0.0628258	7.4	129.4	74	275.1	71.27	46.23	24.08	2.19	High	High	High	High	High	High	High	High
FALSE	High	Master Protein	NP_609241.1	uncharacterized protein Dmel_CG13091, isoform A [Drosophila melanogaster]	0	60.34	34	16	43	15	1	523	59.4	9.01	743	16	9.531	4.659	23.528	0.0149001	0.0250936	0.018086	12.5	58.4	119.4	294.8	5.65	1.94	3.82	15.97	High	High	High	High	High	High	High	High
FALSE	High	Master Protein	NP_524659.1	gomdanji [Drosophila melanogaster]	0	22.597	17	5	19	5	1	305	35.2	8.88	316	5	9.531	19.47	22.914	0.029503	0.0298583	0.0272257	9.3	181.6	88.9	213.7	13.6	1.56	22.82	10.22	High	High	High	High	High	High	High	High
FALSE	High	Master Protein	NP_651529.2	cuticular protein 97Ea, isoform A [Drosophila melanogaster]	0	22.156	22	6	12	6	1	366	40	8.92	192	6	9.44	10.036	4.177	0.0246712	0.0356249	0.0916857	19.3	193.8	182.3	80.7	33.58	36.1	3.59	24.37	High	High	High	High	High	High	High	High
FALSE	High	Master Protein	NP_648394.1	Sperm-Leucylaminopeptidase 3, isoform C [Drosophila melanogaster]	0	35.302	17	10	25	8	1	535	57.7	7.87	423	10	9.439	4.079	8.993	0.0174167	0.0383312	0.0238667	20.4	83.4	193	183.9	14.61	1.83	28.69	17.03	High	High	High	High	High	High	High	High
FALSE	High	Master Protein	NP_608961.2	uncharacterized protein Dmel_CG11034, isoform B [Drosophila melanogaster]	0.002	10.25	5	4	4	4	1	751	84.9	5.03	84	4	9.058	0.925	12.911	0.0638773		0.0684293	20	18.5	181.3	258.5	23.05		8.1	27.01	High	High	High	High	High	High	High	High
FALSE	High	Master Protein	NP_524474.1	heat shock protein 68 [Drosophila melanogaster]	0	143.13	50	29	128	20	1	635	69.7	5.83	3194	29	9.026	7.667	16.776	0.0218385	0.0356249	0.0238667	14.1	108.3	127.6	237.1	7.73	30.33	13.21	19.7	High	High	High	High	High	High	High	High
FALSE	High	Master Protein	NP_610129.3	CG2528, isoform E [Drosophila melanogaster]	0.002	9.452	5	4	4	4	1	731	83.2	6.11	50	4	9.016	7.114	14.667	0.0218385	0.0356249	0.0238667	15	106.4	134.8	219.3	37.65	14.45	3.92	3.46	High	High	High	High	High	High	High	High
FALSE	High	Master Protein	NP_651829.1	cuticular protein 100A [Drosophila melanogaster]	0	18.976	25	5	16	5	1	241	27.1	6.68	480	5	8.963	11.425	5.497	0.0527376	0.0526973	0.132611	17.7	201.9	158.4	97.1	55.63	34.4	2.23	41.1	High	High	High	High	High	High	High	High
FALSE	High	Master Protein	NP_001286058.1	inwardly rectifying potassium channel 3, isoform C [Drosophila melanogaster]	0	19.744	27	6	14	1	1	205	23.3	9.92	261	6	8.876	9.774	7.27	0.354834	0.372019	0.474767	17.1	167.4	152	124.5	101.73	21.11	26.58	12.27	High	High	High	High	High	High	High	High
FALSE	Medium	Master Protein	NP_733086.2	uncharacterized protein Dmel_CG31106 [Drosophila melanogaster]	0.011	4.568	3	1	1	1	1	513	56.1	6.93	34	1	8.794	2.896	4.977	0.053854	0.361038	0.147831	26.5	76.8	233.3	132	11.35	28.32	11.46	3.07	High	High	High	High	High	High	High	High
FALSE	High	Master Protein	NP_001162717.1	IGF-II mRNA-binding protein, isoform J [Drosophila melanogaster]	0	43.68	17	12	23	1	1	580	63.4	8.56	461	12	8.779	8.328	5.483				19	158.5	167.1	104.4		31	12.69	0.85	High	Not Found	High	High	High	High	High	High
FALSE	High	Master Protein	NP_647872.1	cuticular protein 64Aa [Drosophila melanogaster]	0	17.303	22	4	6	4	1	192	19.6	8.31	219	4	8.741	12.043	2.105	0.0595473	0.0542825	0.683059	19.6	236.5	171.7	41.3	69.06	12.44	19.06	35.93	High	High	High	High	High	High	High	High
FALSE	High	Master Protein	NP_524657.2	farinelli [Drosophila melanogaster]	0	19.616	48	6	10	6	1	218	24.6	6.8	124	6	8.695	7.129	17.177	0.0294363	0.044492	0.0348402	14.2	101.5	123.8	244.6	8.56	19.74	39.99	4.16	High	High	High	High	High	High	High	High
FALSE	High	Master Protein	NP_611142.3	CG5089 [Drosophila melanogaster]	0	29.71	20	9	13	9	1	436	51.7	9.92	128	9	8.656	7.882	6.923	0.0699787	0.0994664	0.123511	19.4	153.1	168.1	134.4	6.95	38.93	24.04	46.9	High	High	High	High	High	High	High	High
FALSE	High	Master Protein	NP_524297.1	alpha-Tubulin at 85E [Drosophila melanogaster]	0	145.813	39	19	170	2	1	449	49.9	5.2	4318	19	8.628	5.166	3.47	0.0809813	0.196479	0.354794	24.9	128.7	215	86.5	69.11	38.24	20.46	43.66	High	High	High	High	High	High	High	High
FALSE	High	Master Protein	NP_649538.1	pancreatic eIF-2alpha kinase, isoform A [Drosophila melanogaster]	0.002	10.293	3	3	4	3	1	1162	131	5.08	111	3	8.562	5.698	6.324	0.0592201	0.126071	0.114545	21	119.6	179.8	132.8	36.64	56.28	4.34	24.6	High	High	High	High	High	High	High	High
FALSE	Medium	Master Protein	NP_649940.1	CG8417 [Drosophila melanogaster]	0.03	3.252	2	1	1	1	1	396	44.7	4.98	44	1	8.51	4.977	12.83	0.0480827	0.111472	0.0562368	17.6	87.7	150	226.1	44.53	19.3	12.38	31.16	High	High	High	High	High	High	High	High
FALSE	High	Master Protein	NP_647942.1	ATP synthase, coupling factor 6-like [Drosophila melanogaster]	0.002	14.51	31	3	5	3	1	147	16.7	8.73	47	3	8.399	15.172	17.088	0.0412584	0.0356249	0.0391428	11.7	178	98.5	200.4	35.13	26.27	38.32	15.53	High	High	High	High	High	High	High	High
FALSE	Low	Master Protein	NP_609423.1	world cup, isoform A [Drosophila melanogaster]	0.069	1.997	3	1	1	1	1	409	47	6.43	0	1	8.263	8.271	25.095	0.0595473	0.0785945	0.0456708	11.2	92.8	92.7	281.6	29.79	47.74	27.57	12.47	High	High	High	High	High	High	High	High
FALSE	High	Master Protein	NP_570089.1	CG6414, isoform A [Drosophila melanogaster]	0.006	5.766	6	3	3	3	1	583	65.4	6.3	22	3	8.219	8.416	3.077	0.0218385	0.0301413	0.093796	22.8	191.8	187.3	70.1	10.54	26.88	4.98	29.92	High	High	High	High	High	High	High	High
FALSE	High	Master Protein	NP_611547.2	uncharacterized protein Dmel_CG34396, isoform D [Drosophila melanogaster]	0	19.026	9	5	5	5	1	975	111	9.39	116	5	8.047	2.619	2.094	0.0153388	0.0465354	0.0909201	33.2	87	267.3	69.6	25.14	0.83	1.94	15.9	High	High	High	High	High	High	High	High
FALSE	High	Master Protein	NP_610871.1	CG4744 [Drosophila melanogaster]	0.003	8.632	2	4	4	4	1	1503	171.3	6.74	49	4	7.911	3.665	11.334	0.17372	0.52702	0.146301	19.3	70.8	152.8	219	8.01	20.98	14.87	14.16	High	High	High	High	High	High	High	High
FALSE	High	Master Protein	NP_727644.3	phosphodiesterase 9, isoform D [Drosophila melanogaster]	0	23.452	6	6	10	6	1	1623	173.7	5.69	275	6	7.698	6.048	6.706	0.0490507	0.0869114	0.0819987	22.2	134	170.5	148.6	26.94	5.93	27.46	9.79	High	High	High	High	High	High	High	High
FALSE	High	Master Protein	NP_611762.1	Kinesin-like protein at 59D [Drosophila melanogaster]	0	24.171	10	7	8	7	1	729	81.9	7.01	205	7	7.641	6.512	19.768	0.0449376	0.072807	0.0357967	13.9	90.8	106.5	275.5	26.24	49.47	28.35	27.54	High	High	High	High	High	High	High	High
FALSE	High	Master Protein	NP_524471.2	Glutamyl-prolyl-tRNA synthetase, isoform A [Drosophila melanogaster]	0	270.157	31	67	190	67	1	1714	189.3	8.63	2596	67	7.559	2.653	2.742	0.0167214	0.0617426	0.0649011	33	87.7	249.7	90.6	15.61	16.26	7.77	9.26	High	High	High	High	High	High	High	High
FALSE	High	Master Protein	NP_650042.2	CG4706 [Drosophila melanogaster]	0	65.238	18	15	71	9	1	783	85	7.11	1197	15	7.47	8.033	11.602	0.0167214	0.0224811	0.0186798	17.1	137.4	127.8	198.5	10.08	5.44	17.55	26.29	High	High	High	High	High	High	High	High
FALSE	High	Master Protein	NP_001260524.1	uncharacterized protein Dmel_CG15136, isoform B [Drosophila melanogaster]	0	19.865	29	5	9	5	1	190	20.9	4.74	263	5	7.469	6.674	15.274	0.0156152	0.0224811	0.018086	15.9	106.1	118.8	242.9	15.3	16.49	22.34	2.83	High	High	High	High	High	High	High	High
FALSE	High	Master Protein	NP_733331.1	alpha-Mannosidase class I c [Drosophila melanogaster]	0.006	5.452	5	2	3	2	1	526	61.1	7.59	41	2	7.462	5.937	5.704	0.0153388	0.0224811	0.0214289	23.2	137.8	173.2	132.4	3.97	2.44	11.84	22.88	High	High	High	High	High	High	High	High
FALSE	High	Master Protein	NP_647808.1	uncharacterized protein Dmel_CG14961 [Drosophila melanogaster]	0	120.973	36	26	71	26	1	914	101.3	7.01	1402	26	7.443	10.239	4.605	0.0422654	0.040195	0.109772	20.5	209.7	152.5	94.3	10.64	44.31	13.66	46.51	High	High	High	High	High	High	High	High
FALSE	Medium	Master Protein	NP_651267.1	uncharacterized protein Dmel_CG13623, isoform A [Drosophila melanogaster]	0.028	3.334	11	1	1	1	1	139	15.2	5.95	24	1	7.375	6.231	5.079	0.0257168	0.0413109	0.0607619	23.6	146.8	173.8	119.7	25.65	23.83	33.67	26.02	High	High	High	High	High	High	High	High
FALSE	High	Master Protein	NP_001097707.1	CG7900 [Drosophila melanogaster]	0	17.664	11	5	6	5	1	536	58.8	6.86	134	5	7.334	5.785	1.757	0.0149001	0.0152722	0.042044	29.1	168.4	213.5	51.1	4.94	3.13	5.21	12.35	High	High	High	High	High	High	High	High
FALSE	High	Master Protein	NP_001259836.1	uncharacterized protein Dmel_CG11835, isoform C [Drosophila melanogaster]	0	178.786	50	40	106	38	1	795	82.6	9.74	1596	40	7.175	6.537	6.394	0.0218385	0.0356249	0.0406366	22.3	145.5	159.8	142.4	1.18	31.18	5.52	19.44	High	High	High	High	High	High	High	High
FALSE	High	Master Protein	NP_001246694.1	heat shock protein 23, isoform B [Drosophila melanogaster]	0	161.237	68	14	134	14	1	186	20.6	5.85	3205	14	7.116	3.693	6.43	0.0159431	0.0354836	0.0213943	25.8	95.2	183.4	165.7	2.23	3.76	4.93	0.52	High	High	High	High	High	High	High	High
FALSE	High	Master Protein	NP_001097600.1	starvin, isoform E [Drosophila melanogaster]	0	15.789	13	5	6	5	1	635	68.8	6.32	125	5	7.101	6.684	7.485	0.0218385	0.0356249	0.0357967	21.1	141.3	150.1	158.3	0.54	5.85	1.48	2.82	High	High	High	High	High	High	High	High
FALSE	High	Master Protein	NP_611133.1	CG7813 [Drosophila melanogaster]	0	84.919	31	18	40	18	1	734	82.2	5.81	931	18	7.094	8.663	11.505	0.0167214	0.0224811	0.018086	17	147	120.4	195.2	3.86	10.87	25.91	11.13	High	High	High	High	High	High	High	High
FALSE	High	Master Protein	NP_524925.1	heat shock protein 60B [Drosophila melanogaster]	0	66.766	29	15	41	13	1	648	68.6	5.64	1147	15	7.056	7.294	10.469	0.0360655	0.0443581	0.0414859	18.6	135.4	130.9	194.3	22	37.94	19.24	39.71	High	High	High	High	High	High	High	High
FALSE	High	Master Protein	NP_569914.2	uncharacterized protein Dmel_CG14787 [Drosophila melanogaster]	0	30.21	29	5	17	5	1	260	29.1	8.76	487	5	7.029	5.776	3.869	0.0218385	0.0356249	0.0590679	26.6	153.8	187.2	103	3.8	28.76	2.27	33.28	High	High	High	High	High	High	High	High
FALSE	High	Master Protein	NP_001163662.1	neuroligin 4, isoform D [Drosophila melanogaster]	0.002	13.299	4	3	4	3	1	1281	136	7.69	175	3	7.027	5.839	4.691	0.0218385	0.0356249	0.0513455	23.4	136.4	164.1	109.6	18.35	2.56	0.85	13.68	High	High	High	High	High	High	High	High
FALSE	Medium	Master Protein	NP_650886.1	CG4335 [Drosophila melanogaster]	0.043	2.605	2	1	2	1	1	364	42.1	6.2	48	1	7.017	2.625	2.649	0.0225584	0.14626	0.147943	33.8	88.8	237.3	89.6	45.11	1.34	2.2	20.55	High	High	High	High	High	High	High	High
FALSE	High	Master Protein	NP_523784.2	phosphoenolpyruvate carboxykinase [Drosophila melanogaster]	0	67.548	22	14	36	12	1	647	71.1	6.49	974	14	6.93	3.233	2.583	0.0155648	0.0356249	0.0556085	33.2	107.5	230.4	85.9	9.96	14.69	4.38	19.91	High	High	High	High	High	High	High	High
FALSE	High	Master Protein	NP_650137.3	uncharacterized protein Dmel_CG10005, isoform A [Drosophila melanogaster]	0.004	7.38	11	2	2	2	1	231	25.6	5.16	70	2	6.903	12.16	5.841	0.157665	0.1026	0.232312	17.8	216.6	123	104	73.33	66.5	17.59	20.11	High	High	High	High	High	High	High	High
FALSE	Low	Master Protein	NP_001286270.1	uncharacterized protein Dmel_CG44296 [Drosophila melanogaster]	0.1	1.527	12	1	2	1	1	76	8.4	9.99	16	1	6.868	12.586	18.437	0.0637116	0.0443581	0.043591	12.4	156.5	85.4	229.3	65.44	30.86	15.6	13.21	High	High	High	High	High	High	High	High
FALSE	Low	Master Protein	NP_524914.3	glutathione S transferase D5 [Drosophila melanogaster]	0.1	1.513	3	1	1	1	1	216	24.7	7.4	24	1	6.85	6.511	10.671	0.091496	0.122428	0.0819987	18.2	118.6	124.8	194.3	59.3	22.81	26.12	11.76	High	High	High	High	High	High	High	High
FALSE	High	Master Protein	NP_652593.3	uncharacterized protein Dmel_CG31676, isoform A [Drosophila melanogaster]	0.002	12.319	6	3	5	3	1	159	17.6	7.91	89	3	6.819	14.217	9.081	0.044631	0.0356249	0.0528703	15.8	224.8	107.8	143.6	2.82	9.61	16.09	0.21	High	High	High	High	High	High	High	High
FALSE	High	Master Protein	NP_001014703.1	uncharacterized protein Dmel_CG33521, isoform A [Drosophila melanogaster]	0	33.925	14	9	14	9	1	663	76.4	8.37	290	9	6.746	5.456	4.01	0.0218385	0.0367979	0.0628258	27	147.1	181.8	108.1	36.04	28.35	10.79	9.24	High	High	High	High	High	High	High	High
FALSE	High	Master Protein	NP_001262302.1	uncharacterized protein Dmel_CG42675, isoform G [Drosophila melanogaster]	0.003	8.77	4	2	3	2	1	427	47.3	10.55	80	2	6.745	7.093	5.302	0.0500791	0.0617426	0.0951881	23.2	164.7	156.6	123.1	45.24	12.29	31.33	2.84	High	High	High	High	High	High	High	High
FALSE	High	Master Protein	NP_648013.1	jonah 65Aiii [Drosophila melanogaster]	0.002	10.174	10	3	5	1	1	274	28.5	7.24	164	3	6.739	10.426	17.229				13.7	142.4	92	235.3		29.86	46.15	30.04	Not Found	High	High	High	High	High	High	High
FALSE	High	Master Protein	NP_724664.1	uncharacterized protein Dmel_CG30376 [Drosophila melanogaster]	0	16.233	16	4	7	4	1	226	26.4	9.42	137	4	6.721	7.778	6.093	0.0808185	0.0871194	0.123618	22	171.4	148.1	134.3	32.14	38.41	18.57	62.15	High	High	High	High	High	High	High	High
FALSE	High	Master Protein	NP_001261007.1	Z band alternatively spliced PDZ-motif protein 52, isoform N [Drosophila melanogaster]	0	120.175	23	26	60	5	1	1267	137	8.79	1658	26	6.693	5.382	2.474	0.0453672	0.0798451	0.327643	27.4	147.3	183.1	67.7	40.22	1.48	25.23	20.46	High	High	High	High	High	High	High	High
FALSE	High	Master Protein	NP_996223.1	peroxidase, isoform A [Drosophila melanogaster]	0.005	7.11	3	2	2	2	1	690	76.7	6.32	76	2	6.659	7.995	3.361	0.026141	0.0356249	0.0983584	24.2	193.1	160.8	81.2	8.96	31.98	4.51	34.66	High	High	High	High	High	High	High	High
FALSE	High	Master Protein	NP_610892.1	Sperm-Leucylaminopeptidase 5 [Drosophila melanogaster]	0	26.087	14	8	17	5	1	549	59.6	7.96	250	8	6.606	6.889	12.588	0.0218385	0.0280995	0.0195785	17.7	121.9	116.9	222.9	17.28	24.91	19.82	6.96	High	High	High	High	High	High	High	High
FALSE	High	Master Protein	NP_647723.2	Cyp4d20 [Drosophila melanogaster]	0.002	10.308	9	4	6	3	1	510	58.2	8.57	95	4	6.581	5.327	1.803	0.0149001	0.0224811	0.0562368	32	170.7	210.9	57.8	12.36	5.41	6.3	11.79	High	High	High	High	High	High	High	High
FALSE	High	Master Protein	NP_001260032.1	dumpy, isoform Q [Drosophila melanogaster]	0	24.632	2	7	10	7	1	22949	2441.7	5.26	275	7	6.576	11.113	3.632	0.0445404	0.035941	0.146488	21.5	239.2	141.5	78.2	2.54	36.53	19.54	48.18	High	High	High	High	High	High	High	High
FALSE	High	Master Protein	NP_648244.1	Sperm-Leucylaminopeptidase 1 [Drosophila melanogaster]	0	21.793	16	7	17	4	1	555	61.5	7.8	221	7	6.569	5.138	5.984	0.0262517	0.0456904	0.0480433	25.4	130.6	167.1	152.2	9.99	18.81	21.8	34.09	High	High	High	High	High	High	High	High
FALSE	High	Master Protein	NP_725843.1	thin, isoform B [Drosophila melanogaster]	0	60.719	16	16	25	16	1	1353	145.5	7.33	892	16	6.567	8.17	3.783	0.0149001	0.0152722	0.018086	24.1	197.2	158.5	91.3	8.5	5.08	9.21	0.71	High	High	High	High	High	High	High	High
FALSE	High	Master Protein	NP_722702.1	uncharacterized protein Dmel_CG31659, isoform A [Drosophila melanogaster]	0.002	11.623	11	2	5	2	1	192	21.9	8.41	185	2	6.565	6.232	28.368	0.0218385	0.0356249	0.018086	11.6	72.1	76	328.3	0.53	19.32	18.06	26.19	High	High	High	High	High	High	High	High
FALSE	High	Master Protein	NP_572212.1	thioredoxin T, isoform A [Drosophila melanogaster]	0.003	8.344	15	2	3	2	1	157	17.5	4.41	130	2	6.561	7.704	14.131	0.0167214	0.0224811	0.018086	16.3	125.5	106.8	230.1	22.26	12.54	18.21	5.94	High	High	High	High	High	High	High	High
FALSE	Low	Master Protein	NP_001027156.1	PFTAIRE-interacting factor 1B, isoform A [Drosophila melanogaster]	0.059	2.231	1	1	1	1	1	1041	113.9	4.97	28	1	6.54	5.294	13.303	0.0196143	0.0299229	0.0186798	18.2	96.3	119	242.1	30.78	3.81	9.91	12.12	High	High	High	High	High	High	High	High
FALSE	High	Master Protein	NP_001246359.1	aspartyl beta-hydroxylase, isoform J [Drosophila melanogaster]	0	47.576	30	11	36	4	1	400	45.3	4.03	312	11	6.533	5.63	2.612	0.0477327	0.0782546	0.295846	28.7	161.7	187.6	75	25.88	40.05	10.19	25.63	High	High	High	High	High	High	High	High
FALSE	High	Master Protein	NP_729679.2	IRSp53, isoform A [Drosophila melanogaster]	0	37.064	13	11	16	11	1	1076	120.2	8.94	225	11	6.532	6.71	3.08	0.030964	0.0390871	0.137882	26.5	178	173.3	81.7	18.34	23.49	0.16	28.91	High	High	High	High	High	High	High	High
FALSE	High	Master Protein	NP_649981.1	knickkopf [Drosophila melanogaster]	0.003	9.146	4	3	3	3	1	689	77.7	6.02	62	3	6.418	5.332	3.039	0.0218385	0.0356249	0.0871595	30.2	160.8	193.5	91.7	25.37	32.21	9.61	12.95	High	High	High	High	High	High	High	High
FALSE	High	Master Protein	NP_648068.1	uncharacterized protein Dmel_CG10063 [Drosophila melanogaster]	0	48.626	39	8	31	8	1	212	23.6	9.58	1049	8	6.413	7.241	11.062	0.0218385	0.0320644	0.0238667	18.7	135.3	119.9	206.8	2.3	5.65	37.1	7.46	High	High	High	High	High	High	High	High
FALSE	Medium	Master Protein	NP_731188.1	uncharacterized protein Dmel_CG31473 [Drosophila melanogaster]	0.016	4.316	6	2	3	2	1	257	29.3	8.87	26	2	6.373	5.772	7.043	0.0218385	0.0356249	0.0300261	22.8	131.9	145.6	160.9	8.51	4.58	28.48	8.79	High	High	High	High	High	High	High	High
FALSE	High	Master Protein	NP_611132.1	Sperm-Leucylaminopeptidase 8 [Drosophila melanogaster]	0	27.045	13	7	13	5	1	534	57.7	8.46	280	7	6.362	3.201	4.975	0.0249713	0.0925468	0.0544176	30.2	96.7	192.3	150.4	5.32	3.07	27.1	20.15	High	High	High	High	High	High	High	High
FALSE	High	Master Protein	NP_524957.2	serpin 28F [Drosophila melanogaster]	0.002	9.426	9	4	5	4	1	375	42.5	9.01	38	4	6.356	5.402	21.81	0.0218385	0.0356249	0.0191806	13.9	75	88.3	302.9	4.47	2.31	2.92	44.56	High	High	High	High	High	High	High	High
FALSE	High	Master Protein	NP_610900.1	Sperm-Leucylaminopeptidase 7, isoform A [Drosophila melanogaster]	0	31.238	17	10	23	7	1	527	57.4	8.4	322	10	6.331	4.972	6.121	0.0544412	0.0982665	0.0814544	24.8	123.2	156.9	151.7	15.08	7.66	26.88	1.55	High	High	High	High	High	High	High	High
FALSE	High	Master Protein	NP_001163660.1	uncharacterized protein Dmel_CG33934, isoform E [Drosophila melanogaster]	0.002	11.198	3	2	3	2	1	556	60.9	7.28	24	2	6.321	5.491	11.753	0.0218385	0.0356249	0.0238667	19.7	108.4	124.8	232	13.23	4.43	23.23	16.34	High	High	High	High	High	High	High	High
FALSE	Medium	Master Protein	NP_648523.1	succinate dehydrogenase, subunit A (flavoprotein)-like [Drosophila melanogaster]	0.019	3.792	2	1	1	1	1	651	71.7	8.35	26	1	6.3	9.066	17.271	0.0218385	0.0280995	0.0195785	14.3	129.2	89.8	246.2	6.62	25.75	20.5	25.83	High	High	High	High	High	High	High	High
FALSE	High	Master Protein	NP_723104.2	heat shock protein 60C, isoform A [Drosophila melanogaster]	0	276.454	64	43	342	26	1	576	61.5	7.06	9482	43	6.297	7.851	10.883	0.0219578	0.0301535	0.0238667	18.5	144.9	116.3	200.9	4.03	5.81	39.64	20.33	High	High	High	High	High	High	High	High
FALSE	High	Master Protein	NP_608572.1	major facilitator superfamily transporter 3 [Drosophila melanogaster]	0.002	11.82	9	5	12	5	1	512	55	7.46	103	5	6.249	2.327	3.658	0.026141	0.201761	0.0811705	34.6	80.4	216	126.5	25.57	20.12	6.07	37.26	High	High	High	High	High	High	High	High
FALSE	High	Master Protein	NP_573204.2	CG5172, isoform D [Drosophila melanogaster]	0	17.1	42	3	9	3	1	172	14.6	9.72	361	3	6.075	6.955	2.585	0.0288308	0.0356249	0.169129	27.8	193.7	169.2	72	3.38	34.7	0.22	37.48	High	High	High	High	High	High	High	High
FALSE	High	Master Protein	NP_001261898.1	pH-sensitive chloride channel, isoform N [Drosophila melanogaster]	0	17.262	6	4	6	2	1	978	108.1	7.69	131	4	6.04	2.683	9.359				24.7	66.4	149.4	231.5		21.91	24.71	20.48	High	High	High	High	High	High	High	High
FALSE	High	Master Protein	NP_650333.1	CG9920 [Drosophila melanogaster]	0	63.89	73	11	51	9	1	102	11.1	8.43	716	11	5.982	8.259	11.377	0.0169715	0.0224811	0.018086	18	148.9	107.8	205.1	5	19.13	21.76	12.34	High	High	High	High	High	High	High	High
FALSE	High	Master Protein	NP_523683.1	peroxiredoxin 2540-2 [Drosophila melanogaster]	0	76.139	50	15	52	2	1	220	24.7	6.43	974	15	5.974	6.361	2.994	0.0167214	0.0224811	0.0425888	28.6	182	170.9	85.7	14.95	5.06	3.39	13.31	High	High	High	High	High	High	High	High
FALSE	Medium	Master Protein	NP_610440.1	uncharacterized protein Dmel_CG13747 [Drosophila melanogaster]	0.031	3.146	5	1	2	1	1	222	24.7	6.86	35	1	5.946	4.472	9.974	0.0192319	0.0320644	0.0191806	21.7	97.1	129.1	216.5	0.71	3.93	18.33	3.03	High	High	High	High	High	High	High	High
FALSE	Medium	Master Protein	NP_001259377.1	meiotic P26, isoform C [Drosophila melanogaster]	0.019	3.789	1	1	1	1	1	1206	131.2	5.92	50	1	5.862	5.321	4.13	0.0218385	0.0312322	0.042044	28.3	150.6	165.9	116.9	30.59	14.4	0.4	3.56	High	High	High	High	High	High	High	High
FALSE	High	Master Protein	NP_729966.1	CG7768, isoform A [Drosophila melanogaster]	0	49.958	40	9	37	6	1	164	17.8	8.15	667	9	5.806	3.812	9.714	0.0218385	0.0417466	0.0233811	23.7	90.5	137.9	230.7	13.96	12.74	16.16	9.85	High	High	High	High	High	High	High	High
FALSE	High	Master Protein	NP_726472.1	painting of fourth, isoform A [Drosophila melanogaster]	0	58.692	31	14	30	14	1	495	55.1	6.23	473	14	5.794	4.369	10.826	0.0174656	0.0292474	0.0186798	21.5	94.1	124.8	233.2	2.99	12.03	18.02	1.28	High	High	High	High	High	High	High	High
FALSE	Medium	Master Protein	NP_523866.2	ejaculatory bulb protein II, isoform A [Drosophila melanogaster]	0.016	4.313	18	1	3	1	1	66	7.2	9.14	170	1	5.763	6.121	32.499	0.134208	0.149056	0.0445774	10.7	65.5	61.7	348	57.95	35.32	9.13	53.05	High	High	High	High	High	High	High	High
FALSE	High	Master Protein	NP_608418.1	CG1304 [Drosophila melanogaster]	0.004	7.65	11	3	5	3	1	260	27.8	5.94	88	3	5.76	8.976	2.642	0.0395376	0.0356249	0.203795	25.3	227.5	146	67	35.24	14.64	6.8	42.67	High	High	High	High	High	High	High	High
FALSE	High	Master Protein	NP_001246631.1	axotactin, isoform C [Drosophila melanogaster]	0	134.994	15	28	68	1	1	2179	241.4	5.87	1689	28	5.73	6.61	4.191	0.0218385	0.0311657	0.0494032	25.3	167.1	144.9	106	17.54	9.33	1.27	6.93	High	High	High	High	High	High	High	High
FALSE	High	Master Protein	NP_001097547.1	uncharacterized protein Dmel_CG34461, isoform A [Drosophila melanogaster]	0	17.815	43	4	11	4	1	138	14.9	6.89	177	4	5.72	7.117	2.061	0.0329716	0.0356249	0.314913	29.5	210.2	168.9	60.9	27.36	28.14	20.75	2.42	High	High	High	High	High	High	High	High
FALSE	Medium	Master Protein	NP_001260230.1	CG8475, isoform C [Drosophila melanogaster]	0.019	3.792	1	1	2	1	1	1098	125.2	6.87	56	1	5.699	3.16	1.568	0.122242	0.371661	1	40.1	126.8	228.7	62.9	14.99	55.42	9.93	35.18	High	High	High	High	High	High	High	High
FALSE	High	Master Protein	NP_572182.1	CG7024 [Drosophila melanogaster]	0.003	9.172	10	3	5	3	1	479	53.2	8.66	83	3	5.684	4.39	10.341	0.0892593	0.164428	0.0638068	20.9	91.6	118.5	215.7	57.99	35.57	34.15	2.69	High	High	High	High	High	High	High	High
FALSE	High	Master Protein	NP_001285777.1	Fat body protein 2, isoform B [Drosophila melanogaster]	0	35.961	15	4	101	4	1	256	29	7.2	879	4	5.671	4.083	2.197	0.0247245	0.0496181	0.198008	35.8	146.3	203.2	78.7	7.21	44.06	9.83	4.3	High	High	High	High	High	High	High	High
FALSE	High	Master Protein	NP_649611.2	gasp, isoform A [Drosophila melanogaster]	0	18.694	5	2	11	2	1	258	28.3	4.88	472	2	5.633	7.818	3.344	0.0609045	0.0525678	0.184313	26.7	208.4	150.2	89.1	17.03	44.39	11.91	36.01	High	High	High	High	High	High	High	High
FALSE	High	Master Protein	NP_730716.1	Isoleucyl-tRNA synthetase, isoform A [Drosophila melanogaster]	0	158.011	27	35	69	35	1	1229	141	7.52	1587	35	5.582	1.463	1.665	0.0275163	0.765626	0.513907	46.7	68.3	260.7	77.8	0.64	44.48	9.17	11.01	High	High	High	High	High	High	High	High
FALSE	High	Master Protein	NP_724823.2	transient receptor potential-like, isoform D [Drosophila melanogaster]	0	44.152	14	14	25	14	1	1124	127.7	8.76	466	14	5.573	4.094	4.291	0.0149001	0.0224811	0.018086	31.1	127.3	173.3	133.4	7.05	1.3	1.89	1.15	High	High	High	High	High	High	High	High
FALSE	High	Master Protein	NP_610889.1	uncharacterized protein Dmel_CG42807, isoform A [Drosophila melanogaster]	0	41.238	17	5	23	5	1	278	31	7.77	724	5	5.554	2.599	0.933	0.0322319	0.159334	1	44.4	115.3	246.5	41.4	16	16.19	16.78	27.57	High	High	High	High	High	High	High	High
FALSE	High	Master Protein	NP_001285409.1	CG6470, isoform B [Drosophila melanogaster]	0.006	5.571	6	2	2	2	1	337	38.1	9.85	65	2	5.529	5.366	14.055				18.7	100.4	103.4	262.9		8.69	24.7	23.53	High	High	High	High	High	High	High	High
FALSE	High	Master Protein	NP_609696.1	heimdall [Drosophila melanogaster]	0.002	10.357	5	3	6	3	1	681	75.1	6.58	82	3	5.523	5.946	5.039	0.0345227	0.0407065	0.0600275	26.5	157.7	146.5	133.6	6.29	43.1	14.12	10.56	High	High	High	High	High	High	High	High
FALSE	High	Master Protein	NP_650128.1	CG6971 [Drosophila melanogaster]	0.008	5.006	7	2	2	2	1	250	28.8	5.38	42	2	5.418	7.315	6.775	0.0500791	0.044492	0.0600275	23.1	169.2	125.3	156.7	11.78	11.25	49.92	8.82	High	High	High	High	High	High	High	High
FALSE	High	Master Protein	NP_729963.1	uncharacterized protein Dmel_CG32141 [Drosophila melanogaster]	0.002	12.126	24	4	5	4	1	238	27.5	8.82	27	4	5.375	5.094	9.212	0.0201897	0.0280995	0.0195785	22.8	116.4	122.8	210.4	16.33	4.32	25.14	2.1	High	High	High	High	High	High	High	High
FALSE	High	Master Protein	NP_001260364.1	Porin2, isoform B [Drosophila melanogaster]	0	60.386	38	13	29	13	1	293	31.9	5.21	700	13	5.372	5.509	13.47	0.0218385	0.0292474	0.0186798	19	104.8	102.2	256.3	2.94	16.9	24.29	19.55	High	High	High	High	High	High	High	High
FALSE	High	Master Protein	NP_660192.1	CG4098 [Drosophila melanogaster]	0.002	10.216	8	3	4	3	1	307	34.5	5.48	79	3	5.335	5.17	5.354	0.0218385	0.0320644	0.0316759	28.2	145.7	150.3	150.9	15.88	12.31	0.75	21.16	High	High	High	High	High	High	High	High
FALSE	High	Master Protein	NP_610798.1	chloride channel-b [Drosophila melanogaster]	0	17.669	6	5	13	4	1	813	90.5	8.34	260	5	5.231	6.813	7.472	0.0271204	0.0355254	0.0341149	23.3	158.8	122	174.2	2.16	28.23	3.82	30.95	High	High	High	High	High	High	High	High
FALSE	High	Master Protein	NP_609698.2	nimrod C4 [Drosophila melanogaster]	0.002	12.223	11	4	9	4	1	377	41.4	4.79	219	4	5.229	7.843	3.853	0.0218385	0.0224811	0.045691	26.2	205.7	137.1	101.1	23.32	9.03	2.03	28.32	High	High	High	High	High	High	High	High
FALSE	High	Master Protein	NP_651683.1	cytochrome c1-like [Drosophila melanogaster]	0	32.253	28	9	15	9	1	344	38.1	7.87	190	9	5.226	4.591	8.901	0.0197339	0.0283396	0.0194195	24.1	110.8	126.1	214.8	10.64	1	30.94	4.8	High	High	High	High	High	High	High	High
FALSE	High	Master Protein	NP_611930.1	uncharacterized protein Dmel_CG11413 [Drosophila melanogaster]	0.002	9.047	22	2	2	2	1	142	14.9	10.1	61	2	5.179	5.383	1.964	0.0259897	0.0356249	0.260793	32.9	176.9	170.1	64.5	11.58	13.47	17.9	25.01	High	High	High	High	High	High	High	High
FALSE	Low	Master Protein	NP_608372.1	CG9572, isoform A [Drosophila melanogaster]	0.067	2.048	2	1	1	1	1	441	46.8	7.24	34	1	5.168	6.72	3.936	0.177914	0.148057	0.311263	24.2	162.5	124.9	95.1	85.05	6.42	0.49	27.61	High	High	High	High	High	High	High	High
FALSE	High	Master Protein	NP_731305.2	uncharacterized protein Dmel_CG11984, isoform D [Drosophila melanogaster]	0	20.884	13	5	9	5	1	599	62.4	5.72	220	5	5.153	4.639	4.447	0.0317634	0.0461666	0.0600275	29.5	136.9	152.1	131.2	11.87	26.98	6.71	9.89	High	High	High	High	High	High	High	High
FALSE	High	Master Protein	NP_001096959.1	inaF-C [Drosophila melanogaster]	0.003	8.824	24	2	2	2	1	140	15.1	8.28	101	2	5.13	4.322	3.114	0.0536026	0.0916253	0.170194	31.9	137.8	163.6	99.3	16.14	11.84	13.49	1.8	High	High	High	High	High	High	High	High
FALSE	High	Master Protein	NP_650501.1	CG4546 [Drosophila melanogaster]	0	36.663	21	11	13	11	1	457	52.1	4.87	280	11	5.101	5.829	9.704	0.0275163	0.0356249	0.0261262	21.8	127.2	111.3	211.7	7.3	7.5	32.5	1.69	High	High	High	High	High	High	High	High
FALSE	High	Master Protein	NP_001163102.1	lectin-46Cb [Drosophila melanogaster]	0.002	11.157	4	2	6	2	1	322	33.8	4.94	173	2	5.056	3.85	19.482	0.0250391	0.047965	0.0191806	16.5	63.4	83.3	320.8	19.33	0.73	15.91	31.54	High	High	High	High	High	High	High	High
FALSE	High	Master Protein	NP_651451.1	uncharacterized protein Dmel_CG14540 [Drosophila melanogaster]	0	18.448	14	6	6	6	1	613	68.5	9	148	6	5.039	5.856	9.143	0.0570278	0.0612131	0.0506648	23.3	136.3	117.3	212.8	27.19	28.97	27.48	6.49	High	High	High	High	High	High	High	High
FALSE	High	Master Protein	NP_523675.1	sugar transporter 4 [Drosophila melanogaster]	0.002	9.788	8	3	3	3	1	444	48	8.53	83	3	5.035	3.749	7.341	0.0487354	0.102487	0.0494032	27.5	103.2	138.5	202	2.54	29.98	4.58	15.42	High	High	High	High	High	High	High	High
FALSE	High	Master Protein	NP_647722.1	uncharacterized protein Dmel_CG16762 [Drosophila melanogaster]	0	17.671	11	5	7	5	1	254	27.7	6.33	145	5	5.027	3.062	1.001	0.0230571	0.0680115	1	44.6	136.6	224.2	44.6	35	5.02	16.12	13.47	High	High	High	High	High	High	High	High
FALSE	High	Master Protein	NP_001246604.1	uncharacterized protein Dmel_CG43074 [Drosophila melanogaster]	0	18.278	14	5	14	5	1	182	20.9	5.03	242	5	5.012	6.164	0.497	0.0216142	0.0224811	0.129537	35.9	221.5	180.1	17.9	9.61	27.64	16.95	3.89	High	High	High	High	High	High	High	High
FALSE	High	Master Protein	NP_477153.1	toucan, isoform A [Drosophila melanogaster]	0.004	7.672	2	4	5	4	1	2162	234	8.76	23	4	5.001	6.296	6.914	0.0609045	0.0558449	0.0600275	23.8	149.9	119	164.6	9.92	5.72	16.9	9	High	High	High	High	High	High	High	High
FALSE	Medium	Master Protein	NP_524388.1	salivary gland secretion 5 [Drosophila melanogaster]	0.027	3.391	7	1	2	1	1	163	18.8	7.72	52	1	5	6.498	1.922	0.0923773	0.0815955	0.689757	32.4	210.6	162.1	62.3	16.41	57.16	15.81	8.55	High	High	High	High	High	High	High	High
FALSE	Low	Master Protein	NP_001036331.1	BG642163, isoform A [Drosophila melanogaster]	0.063	2.161	2	1	3	1	1	415	43.8	9.09	62	1	4.999	5.865	25.805	0.847995	0.856719	0.350487	12.9	75.8	64.6	333.6	12.15	16.17	13.47	33.19	High	High	High	High	High	High	High	High
FALSE	High	Master Protein	NP_647966.1	blanks [Drosophila melanogaster]	0	20.436	17	6	10	6	1	324	35.6	8.27	246	6	4.981	6.448	14.549	0.0336587	0.0356249	0.0238667	17.7	114.2	88.2	257.8	8.62	34.59	21.35	25.08	High	High	High	High	High	High	High	High
FALSE	Medium	Master Protein	NP_650799.1	CG3581 [Drosophila melanogaster]	0.031	3.122	4	1	1	1	1	253	30.2	9.89	48	1	4.926	4.131	10.796	0.280177	0.408945	0.139955	23.1	95.4	113.7	249.3	24.19	7.28	12.69	54.75	High	High	High	High	High	High	High	High
FALSE	High	Master Protein	NP_649399.1	NADH dehydrogenase (ubiquinone) B14.5 A subunit-like [Drosophila melanogaster]	0	16.337	37	5	11	5	1	145	16	9.86	112	5	4.913	4.199	8.504	0.0292063	0.0469186	0.028818	24.8	104.3	122.1	211.3	10.53	10.76	23.4	6.66	High	High	High	High	High	High	High	High
FALSE	Medium	Master Protein	NP_001263056.1	uncharacterized protein Dmel_CG11882, isoform B [Drosophila melanogaster]	0.019	3.792	8	1	1	1	1	263	29.7	4.86	38	1	4.899	6.588	2.21				30.4	200.4	149	67.2		16.24	9.53	2.02	Not Found	High	High	High	High	High	High	High
FALSE	High	Master Protein	NP_001259545.1	mushroom body defect, isoform L [Drosophila melanogaster]	0	43.692	10	16	23	15	1	2501	286.3	5.76	336	16	4.896	3.3	7.534	0.0386046	0.0963434	0.0391428	27	89	132	203.1	10.47	6.47	20.64	1.12	High	High	High	High	High	High	High	High
FALSE	High	Master Protein	NP_001260509.1	cytochrome c distal, isoform B [Drosophila melanogaster]	0.002	13.895	34	5	12	4	1	105	11.4	9.39	145	5	4.881	7.526	8.854	0.0218385	0.0224811	0.0195785	21.4	161.3	104.6	189.7	3.05	6.98	30.65	6.11	High	High	High	High	High	High	High	High
FALSE	High	Master Protein	NP_650462.1	heineken-cup [Drosophila melanogaster]	0.003	8.179	11	3	4	3	1	256	29.2	4.39	104	3	4.879	6.616	12.318	0.332837	0.265963	0.143898	19.8	130.7	96.4	243.3	33.53	37.58	30.31	1.06	High	High	High	High	High	High	High	High
FALSE	High	Master Protein	NP_001286040.1	accessory gland protein 36DE, isoform B [Drosophila melanogaster]	0	327.053	58	55	204	55	1	912	101.9	8.98	5594	55	4.874	7.371	24.275	0.0235437	0.0280995	0.018086	13	95.6	63.2	315	9.28	8.61	22.87	7.56	High	High	High	High	High	High	High	High
FALSE	High	Master Protein	NP_001163221.1	RIC3 acetylcholine receptor chaperone, isoform H [Drosophila melanogaster]	0	60.001	25	11	33	2	1	456	49.8	6.1	676	11	4.872	4.346	2.27	0.063721	0.0982665	0.365576	34.3	149.1	167.2	77.9	25.41	38.95	6.91	41.19	High	High	High	High	High	High	High	High
FALSE	Low	Master Protein	NP_649075.1	uncharacterized protein Dmel_CG14077, isoform B [Drosophila melanogaster]	0.13	1.245	2	1	1	1	1	289	32.2	9.91	0	1	4.84	10.338	10.277	0.967229	0.794261	0.793796	18.8	194.8	91.2	193.7	25.39	16.63	40.14	17.94	High	High	High	High	High	High	High	High
FALSE	High	Master Protein	NP_001189128.1	uncharacterized protein Dmel_CG42853 [Drosophila melanogaster]	0.004	7.649	8	2	3	2	1	284	32.3	5.27	70	2	4.833	7.438	17.948	0.0301542	0.0320644	0.0195785	15.6	115.8	75.2	279.3	21.65	29.71	19.76	5.17	High	High	High	High	High	High	High	High
FALSE	High	Master Protein	NP_476812.1	prophenoloxidase 1 [Drosophila melanogaster]	0	210.38	49	36	120	36	1	690	79	6.6	2607	36	4.83	7.357	0.972	0.0205496	0.0224811	1	33	242.7	159.4	32.1	7.51	22.95	9.31	19.7	High	High	High	High	High	High	High	High
FALSE	Medium	Master Protein	NP_650547.1	uncharacterized protein Dmel_CG14883 [Drosophila melanogaster]	0.019	3.792	3	1	1	1	1	330	37.7	8.73	59	1	4.802	4.293	4.037	0.0494313	0.0788471	0.0894086	32.1	137.9	154.3	129.7	35.18	5.49	7.36	11.75	High	High	High	High	High	High	High	High
FALSE	Low	Master Protein	NP_001261169.1	uncharacterized protein Dmel_CG13579, isoform B [Drosophila melanogaster]	0.063	2.168	2	1	1	1	1	716	78.6	8.92	33	1	4.788	3.838	3.049	0.0224354	0.040115	0.0661633	36.9	141.5	176.5	112.4	33.27	1.29	20.46	3.23	High	High	High	High	High	High	High	High
FALSE	Medium	Master Protein	NP_610332.3	major facilitator superfamily transporter 12, isoform A [Drosophila melanogaster]	0.044	2.511	2	1	3	1	1	477	51.7	7.85	56	1	4.778	1.816	3.596	0.0205496	0.152102	0.0369737	41.9	76	200	150.5	2.67	13.62	8.03	25.59	High	High	High	High	High	High	High	High
FALSE	High	Master Protein	NP_569839.2	CG3777, isoform B [Drosophila melanogaster]	0	59.273	19	14	31	14	1	879	94.3	5.41	607	14	4.774	5.155	3.058	0.0167214	0.0224811	0.0367436	32.9	169.6	157	100.6	5.65	14.18	3.61	14.64	High	High	High	High	High	High	High	High
FALSE	High	Master Protein	NP_573131.1	calnexin 14D [Drosophila melanogaster]	0	138.393	34	25	84	17	1	639	72.6	4.91	1308	25	4.765	4.483	11.637	0.0676776	0.0961806	0.042044	21.6	96.9	103	251.4	0.78	6.47	20.09	14.36	High	High	High	High	High	High	High	High
FALSE	High	Master Protein	NP_001245922.1	uninflatable, isoform D [Drosophila melanogaster]	0	101.007	9	32	52	32	1	3589	390.3	5.26	922	32	4.753	4.17	2.232	0.0218385	0.0356249	0.109443	37.4	156.1	177.9	83.5	13.97	12.4	3.03	29.14	High	High	High	High	High	High	High	High
FALSE	High	Master Protein	NP_729394.1	Sperm-Leucylaminopeptidase 2 [Drosophila melanogaster]	0	22.456	16	7	19	4	1	552	61.3	6.92	225	7	4.728	4.11	5.514	0.0245205	0.0392402	0.0357967	30.5	125.3	144.1	168	13.26	9.12	35.49	14.21	High	High	High	High	High	High	High	High
FALSE	High	Master Protein	NP_476644.1	accessory gland protein 26Aa [Drosophila melanogaster]	0	61.03	42	14	36	14	1	264	29.6	8.84	535	14	4.7	5.768	18.77	0.0307412	0.0356249	0.0195785	16	92.2	75.1	300	2.82	14.45	18.82	15.42	High	High	High	High	High	High	High	High
FALSE	High	Master Protein	NP_001261393.1	Dpy-30-like 2, isoform B [Drosophila melanogaster]	0.004	7.823	34	2	2	2	1	98	10.6	4.97	83	2	4.687	3.109	7.473	0.0386046	0.102397	0.0391428	27.1	84.3	127.1	202.7	34.58	27.57	4.08	19.18	High	High	High	High	High	High	High	High
FALSE	High	Master Protein	NP_647779.2	uncharacterized protein Dmel_CG14964 [Drosophila melanogaster]	0	82.767	18	18	33	18	1	1443	160.5	7.17	800	18	4.685	4.991	3.26	0.0498917	0.0587398	0.131845	31.8	158.9	149.1	103.7	32.51	19.49	0.68	23.07	High	High	High	High	High	High	High	High
FALSE	Medium	Master Protein	NP_476787.1	white [Drosophila melanogaster]	0.049	2.438	1	1	1	1	1	687	75.7	8.63	35	1	4.674	1.214	1.812	0.141935	1	0.861058	53.1	64.4	248.2	96.2	70.15	28.96	3.96	14.51	High	High	High	High	High	High	High	High
FALSE	High	Master Protein	NP_730594.1	schizo, isoform B [Drosophila melanogaster]	0.002	12.237	5	4	6	4	1	1325	143.9	8.73	115	4	4.659	3.83	3.513	0.192457	0.306514	0.348136	34	130.3	158.5	119.5	15.6	48.65	34.81	22.7	High	High	High	High	High	High	High	High
FALSE	High	Master Protein	NP_001027202.1	I'm not dead yet 2, isoform A [Drosophila melanogaster]	0.006	5.855	3	2	2	2	1	562	61.9	8.47	45	2	4.658	4.386	7.651	0.0358144	0.0495947	0.0357967	27.5	120.4	127.9	210	12.07	0.23	17.32	30.09	High	High	High	High	High	High	High	High
FALSE	High	Master Protein	NP_610947.3	CG8547, isoform C [Drosophila melanogaster]	0	64.374	29	15	30	15	1	618	68	8.54	593	15	4.65	4.612	3.168	0.0153388	0.0224811	0.0238667	33.5	154.4	155.7	106.1	6.49	12.67	3.29	5.65	High	High	High	High	High	High	High	High
FALSE	High	Master Protein	NP_788758.3	darkener of apricot, isoform R [Drosophila melanogaster]	0.002	14.266	5	4	5	2	1	1229	137.5	9.06	126	4	4.636	7.716	3.436	0.0902957	0.0560161	0.191147	27.3	210.7	126.6	93.8	33.75	12.84	34.43	0.18	High	High	High	High	High	High	High	High
FALSE	High	Master Protein	NP_651435.1	CG5886 [Drosophila melanogaster]	0	43.099	23	10	17	10	1	515	59	8.32	469	10	4.631	3.694	3.585	0.0153933	0.0224811	0.0238322	35.1	129.7	162.6	125.9	11.52	7.83	7.42	0.77	High	High	High	High	High	High	High	High
FALSE	Medium	Master Protein	NP_477279.1	Lcp65Ac [Drosophila melanogaster]	0.013	4.347	11	1	1	1	1	109	11.7	4.41	74	1	4.621	2.911	1.104	0.0725212	0.218363	1	46.3	134.8	214	51.1	4.45	28.37	55.03	18.62	High	High	High	High	High	High	High	High
FALSE	High	Master Protein	NP_476768.1	transient receptor potential, isoform A [Drosophila melanogaster]	0	176.212	31	41	141	41	1	1275	142.5	8.13	2116	41	4.621	3.156	2.185	0.0215275	0.035941	0.0850946	39.8	125.5	183.8	86.9	8.6	10.37	7.4	0.3	High	High	High	High	High	High	High	High
FALSE	High	Master Protein	NP_001245921.1	uncharacterized protein Dmel_CG18304, isoform B [Drosophila melanogaster]	0	94.636	19	32	47	32	1	1819	205	9.29	710	32	4.609	4.499	2.946	0.0205496	0.0280995	0.0469802	34.3	154.3	158.1	101.1	2.31	11.04	3.18	2.51	High	High	High	High	High	High	High	High
FALSE	High	Master Protein	NP_001097732.1	uncharacterized protein Dmel_CG12945, isoform B [Drosophila melanogaster]	0	34.451	20	7	17	7	1	449	50.6	5.86	370	7	4.589	3.362	3.317	0.0218385	0.0387281	0.0489174	35.3	118.7	162.1	117.1	8.74	31.74	2.24	3.55	High	High	High	High	High	High	High	High
FALSE	High	Master Protein	NP_572669.2	myosin 10A, isoform C [Drosophila melanogaster]	0	68.23	9	22	27	22	1	3054	339	8.13	583	22	4.567	4.211	2.392	0.0167214	0.0224811	0.0522111	37.6	158.3	171.7	89.9	10.55	3.34	9.05	20.24	High	High	High	High	High	High	High	High
FALSE	High	Master Protein	NP_610858.1	CG4716, isoform A [Drosophila melanogaster]	0.005	6.652	10	2	2	2	1	223	24.8	4.86	56	2	4.535	2.941	2.98	0.333754	0.664928	0.6514	34.2	100.6	155.2	102	3.51	89.71	12.92	0.15	High	High	High	High	High	High	High	High
FALSE	High	Master Protein	NP_001259974.1	RNA-binding protein 9, isoform J [Drosophila melanogaster]	0.002	11.903	6	4	6	3	1	684	71.2	9.52	126	4	4.507	4.526	3.178	0.0385149	0.0485529	0.0955878	34.4	155.6	154.9	109.2	11.71	10.76	0.23	11.4	High	High	High	High	High	High	High	High
FALSE	High	Master Protein	NP_650568.2	uncharacterized protein Dmel_CG14893 [Drosophila melanogaster]	0	15.944	8	4	6	4	1	510	58.8	9.06	122	4	4.505	4.065	1.469	0.0699787	0.106174	0.949883	40.9	166.2	184.3	60.1	12.45	6.82	22.14	40.67	High	High	High	High	High	High	High	High
FALSE	High	Master Protein	NP_651755.2	CG7903, isoform A [Drosophila melanogaster]	0	18.747	21	7	11	7	1	384	40.2	11.18	145	7	4.503	5.534	2.772	0.0923773	0.0859996	0.28328	31.7	175.6	142.9	88	15.51	28.93	10.79	32.85	High	High	High	High	High	High	High	High
FALSE	High	Master Protein	NP_524126.1	fringe connection, isoform A [Drosophila melanogaster]	0	18.785	12	4	5	4	1	373	41.2	9.04	126	4	4.476	3.75	1.788	0.0218385	0.0356249	0.218171	41.3	155	185	73.9	23.79	12.5	17.39	16.59	High	High	High	High	High	High	High	High
FALSE	High	Master Protein	NP_733394.3	uncharacterized protein Dmel_CG31013 [Drosophila melanogaster]	0	19.299	13	7	7	7	1	534	61.5	8.91	95	7	4.475	4.749	7.245	0.0354004	0.0422565	0.0356211	27.1	128.7	121.2	196.3	27.75	21.76	12.32	2.28	High	High	High	High	High	High	High	High
FALSE	High	Master Protein	NP_647924.2	uncharacterized protein Dmel_CG18418 [Drosophila melanogaster]	0.006	5.76	5	2	3	2	1	311	34.4	9.44	71	2	4.457	6.45	7.743	0.0263734	0.0299382	0.0261262	23.7	152.7	105.5	183.3	25.17	10.86	30.92	2.04	High	High	High	High	High	High	High	High
FALSE	Medium	Master Protein	NP_731781.1	CG8630 [Drosophila melanogaster]	0.011	4.617	5	1	12	1	1	408	46.3	7.44	516	1	4.446	4.852	5.812	0.0376795	0.0433292	0.0450458	28.7	139.1	127.4	166.6	26.05	7.83	12.89	17.81	High	High	High	High	High	High	High	High
FALSE	Medium	Master Protein	NP_001097523.1	cuticular protein 65Ax1 [Drosophila melanogaster]	0.011	4.617	22	1	2	1	1	102	10.7	4.42	154	1	4.441	1.238	0.977	0.79773	1	1	55.4	68.5	245.9	54.1	27.95	10.94	129.18	15.32	High	High	High	High	High	High	High	High
FALSE	High	Master Protein	NP_652337.2	uncharacterized protein Dmel_CG42540, isoform F [Drosophila melanogaster]	0	53.271	17	9	71	1	1	506	56.6	8.73	1969	9	4.44	2.874	3.65	0.125688	0.329543	0.211565	37.8	108.6	167.8	138	25.28	20.32	11.75	15.76	High	High	High	High	High	High	High	High
FALSE	High	Master Protein	NP_729613.1	Sperm-Leucylaminopeptidase 4 [Drosophila melanogaster]	0	51.093	21	13	22	12	1	524	57.5	8.1	479	13	4.436	2.758	3.685	0.0442165	0.142349	0.0821842	38.8	107.1	172.3	143.2	0.97	19.38	23.02	34.7	High	High	High	High	High	High	High	High
FALSE	Low	Master Protein	NP_649655.1	grappa, isoform E [Drosophila melanogaster]	0.068	2.029	1	1	1	1	1	1848	201.2	9.36	0	1	4.396	4.3	2.526	0.231664	0.28156	0.632176	33.8	145.5	148.8	85.5	71.78	19.58	19.7	23.32	High	High	High	High	High	High	High	High
FALSE	High	Master Protein	NP_647762.3	sphingosine kinase 2 [Drosophila melanogaster]	0	21.327	10	5	10	5	1	661	73.8	7.08	339	5	4.39	3.805	4.276	0.0512381	0.0859996	0.0775211	34.6	131.8	152.1	148.1	2.82	33.92	21.17	5.71	High	High	High	High	High	High	High	High
FALSE	High	Master Protein	NP_731600.1	jupiter, isoform B [Drosophila melanogaster]	0	43.978	42	7	30	4	1	185	19.7	5.26	674	7	4.383	4.057	7.324	0.0366801	0.0525678	0.0356485	27.6	111.9	120.9	202.1	9.84	34.62	5.55	13.22	High	High	High	High	High	High	High	High
FALSE	High	Master Protein	NP_001245588.1	CG7766, isoform H [Drosophila melanogaster]	0	31.829	8	9	13	9	1	1358	151.5	6.19	311	9	4.331	3.313	1.991	0.0170038	0.0283396	0.0754483	42.5	140.7	183.9	84.5	9.32	21.32	1.39	4.77	High	High	High	High	High	High	High	High
FALSE	High	Master Protein	NP_723193.1	uncharacterized protein Dmel_CG11050, isoform B [Drosophila melanogaster]	0.004	7.584	6	2	3	2	1	388	42.5	6.7	84	2	4.314	4.087	1.894				40.5	165.5	174.7	76.7		0.35	57.86	35.63	High	High	High	High	High	High	High	High
FALSE	High	Master Protein	NP_731505.1	fau [Drosophila melanogaster]	0	44.659	78	8	37	7	1	131	14.4	9.6	1097	8	4.299	5.222	3.401	0.026459	0.0356249	0.0600275	33.3	173.8	143	113.2	5.28	18.66	32.01	3.28	High	High	High	High	High	High	High	High
FALSE	Medium	Master Protein	NP_650087.2	CG6790 [Drosophila melanogaster]	0.031	3.165	1	1	1	1	1	897	101.3	9.16	0	1	4.298	2.789	6.835	0.0728048	0.21557	0.0600275	31.6	88.2	135.9	216	6.63	5.95	20.4	23.97	High	High	High	High	High	High	High	High
FALSE	High	Master Protein	NP_723896.1	vasa intronic gene, isoform B [Drosophila melanogaster]	0	151.071	54	27	118	27	1	490	52.7	9.74	1881	27	4.291	5.324	3.774	0.0397717	0.0383175	0.0694724	31.7	168.9	136.2	119.7	3.38	24.47	11.6	16.66	High	High	High	High	High	High	High	High
FALSE	High	Master Protein	NP_648467.1	CG6140, isoform A [Drosophila melanogaster]	0	45.857	31	12	23	10	1	470	50.7	8.21	506	12	4.282	3.771	5.899	0.0174167	0.0273455	0.0191806	31.3	118.2	134.2	184.8	16.74	15.96	12.46	0.61	High	High	High	High	High	High	High	High
FALSE	High	Master Protein	NP_001285211.1	neuropilin and tolloid-like, isoform B [Drosophila melanogaster]	0.004	7.325	5	3	3	3	1	822	91.8	6.96	56	3	4.281	4.694	2.537	0.0218385	0.0280995	0.0623296	34.9	163.7	149.3	88.5	5.17	4.07	14.01	8.54	High	High	High	High	High	High	High	High
FALSE	High	Master Protein	NP_648836.2	ATP synthase, beta subunit-like [Drosophila melanogaster]	0	135.252	40	22	197	17	1	622	67.7	5.12	5893	22	4.279	5.674	11.686	0.0368407	0.0356249	0.0238667	20.9	118.7	89.5	244.4	11.08	18.1	18.07	13.7	High	High	High	High	High	High	High	High
FALSE	High	Master Protein	NP_733183.1	uncharacterized protein Dmel_CG31075, isoform A [Drosophila melanogaster]	0	104.623	35	18	61	18	1	485	52.6	6.67	1419	18	4.272	2.657	2.767	0.0149001	0.0224811	0.0209943	42.8	113.6	182.7	118.3	9.33	6.56	2.37	8.24	High	High	High	High	High	High	High	High
FALSE	High	Master Protein	NP_731272.1	CG8136, isoform B [Drosophila melanogaster]	0	20.038	12	5	10	5	1	441	49	9.01	238	5	4.261	4.108	18.805	0.154798	0.197013	0.0469802	17.2	70.7	73.3	323.5	20.35	34.15	23.54	61.06	High	High	High	High	High	High	High	High
FALSE	High	Master Protein	NP_523509.2	PDGF- and VEGF-receptor related, isoform A [Drosophila melanogaster]	0	85.089	18	23	41	1	1	1509	170.2	6	768	23	4.261	3.173	2.471	0.0218385	0.0356249	0.0628258	42.3	134.2	180.2	104.5	17.93	6.47	4.44	1.87	High	High	High	High	High	High	High	High
FALSE	High	Master Protein	NP_730717.1	uncharacterized protein Dmel_CG32450 [Drosophila melanogaster]	0.002	13.654	22	4	7	4	1	158	18.3	8.91	55	4	4.243	2.463	5.941	0.0167214	0.0367979	0.0186798	33.5	82.4	142	198.8	10.58	16.46	4.65	15.01	High	High	High	High	High	High	High	High
FALSE	High	Master Protein	NP_651815.1	CG2267, isoform A [Drosophila melanogaster]	0.006	6.043	5	2	3	2	1	390	44.1	9.5	53	2	4.243	4.827	10.27	0.040292	0.043427	0.026595	23.5	113.3	99.6	241.1	12.8	19.32	10.7	10.35	High	High	High	High	High	High	High	High
FALSE	High	Master Protein	NP_651514.1	uncharacterized protein Dmel_CG18472 [Drosophila melanogaster]	0.005	6.768	7	3	3	3	1	469	53.8	8.65	14	3	4.223	5.41	10.562	0.159261	0.131174	0.0661633	22.5	121.7	95	237.7	7.21	7.75	46	20.21	High	High	High	High	High	High	High	High
FALSE	High	Master Protein	NP_001246428.1	smooth, isoform T [Drosophila melanogaster]	0	16.533	11	7	16	7	1	552	60.9	8.78	183	7	4.22	5.328	7.735	0.0249713	0.0320644	0.0238667	25.9	138.1	109.4	200.5	8.04	18	14.63	18.5	High	High	High	High	High	High	High	High
FALSE	High	Master Protein	NP_651713.1	Odorant-binding protein 99b, isoform A [Drosophila melanogaster]	0	27.194	31	5	17	5	1	149	17.2	6.6	306	5	4.197	4.679	2.589	0.0906139	0.095571	0.291311	36.6	171.1	153.5	94.7	3.02	35.28	20.41	8.51	High	High	High	High	High	High	High	High
FALSE	High	Master Protein	NP_652319.1	uncharacterized protein Dmel_CG11373 [Drosophila melanogaster]	0.005	6.279	42	2	3	2	1	59	6.4	11.85	89	2	4.191	7.127	10.113	0.0774061	0.0469186	0.0445774	21.4	152.7	89.8	216.7	12.05	29.29	48.87	11.86	High	High	High	High	High	High	High	High
FALSE	High	Master Protein	NP_001285102.1	CG2145, isoform B [Drosophila melanogaster]	0	79.386	24	15	53	15	1	592	63.6	8.88	1348	15	4.188	3.691	2.983	0.0167214	0.0229959	0.0319193	38.6	142.4	161.6	115.1	1.61	2.9	0.32	16	High	High	High	High	High	High	High	High
FALSE	High	Master Protein	NP_523795.2	beta-Tubulin at 56D, isoform B [Drosophila melanogaster]	0	258.086	55	25	511	5	1	447	50.1	4.86	12734	25	4.173	3.512	1.842	0.0174167	0.0280995	0.0951881	43.3	151.9	180.5	79.7	1.45	2.87	8.26	9.07	High	High	High	High	High	High	High	High
FALSE	High	Master Protein	NP_524174.1	flightin, isoform A [Drosophila melanogaster]	0	163.529	72	19	175	19	1	182	20.6	5.48	3324	19	4.156	6.089	3.346	0.0218385	0.0224811	0.0391428	32	195.1	133.2	107.2	19.73	3.49	22.53	9.83	High	High	High	High	High	High	High	High
FALSE	High	Master Protein	NP_727519.1	discs large 1, isoform F [Drosophila melanogaster]	0	145.402	42	30	115	17	1	816	88.6	4.88	2840	30	4.151	3.249	3.671	0.0327605	0.0633097	0.0600275	36.3	117.8	150.5	133.2	21.16	8.03	1.84	1.49	High	High	High	High	High	High	High	High
FALSE	High	Master Protein	NP_524290.2	beta-Tubulin at 85D [Drosophila melanogaster]	0	187.256	48	22	355	6	1	446	49.8	4.83	7834	22	4.15	3.499	5.699	0.0218385	0.0370832	0.026595	32.6	114	135.2	185.7	9.26	21.24	16.84	17.4	High	High	High	High	High	High	High	High
FALSE	Low	Master Protein	NP_726224.3	roundabout 1, isoform C [Drosophila melanogaster]	0.063	2.141	1	1	1	1	1	1395	151.7	7.24	0	1	4.123	4.747	3.56	0.16291	0.155162	0.248952	33.7	160.1	139.1	120.1	7.16	23.94	5.39	38.37	High	High	High	High	High	High	High	High
FALSE	High	Master Protein	NP_001162875.1	Reticulon-like1, isoform H [Drosophila melanogaster]	0	228.542	44	34	146	24	1	607	65.4	4.87	3012	34	4.12	5.249	5.375	0.024906	0.0320644	0.0320538	29.3	153.6	120.6	157.3	7.89	12.03	8.2	20.34	High	High	High	High	High	High	High	High
FALSE	High	Master Protein	NP_001138101.1	uncharacterized protein Dmel_CG31145, isoform C [Drosophila melanogaster]	0	33.704	13	10	13	10	1	980	109.7	8.27	342	10	4.12	3.368	2.217	0.0167214	0.024223	0.0480433	42.1	141.8	173.5	93.4	4.24	6.19	18.65	9.36	High	High	High	High	High	High	High	High
FALSE	Medium	Master Protein	NP_651517.1	uncharacterized protein Dmel_CG14253, isoform B [Drosophila melanogaster]	0.044	2.568	2	1	1	1	1	399	45.4	6.61	38	1	4.114	3.477	3.317	0.107658	0.177595	0.196629	35.8	124.6	147.5	118.9	36.11	12.21	4.17	13.48	High	High	High	High	High	High	High	High
FALSE	High	Master Protein	NP_788622.1	molecule interacting with CasL, isoform C [Drosophila melanogaster]	0	62.704	5	23	27	23	1	4723	524.7	7.09	366	23	4.11	5.394	3.988	0.0504757	0.0443581	0.0773642	31.5	170.1	129.6	125.7	1.54	14.84	9.75	27.07	High	High	High	High	High	High	High	High
FALSE	Low	Master Protein	NP_788599.1	uncharacterized protein Dmel_CG33189 [Drosophila melanogaster]	0.078	1.846	4	1	1	1	1	177	19.7	5.06	24	1	4.1	3.107	6.767	0.0813318	0.174138	0.0600275	28	87	114.8	189.5	14.07	23.15	6.89	28.17	High	High	High	High	High	High	High	High
FALSE	High	Master Protein	NP_647668.1	cuticular protein 62Bc, isoform A [Drosophila melanogaster]	0	21.526	26	3	9	3	1	180	18.7	6.92	225	3	4.078	5.273	2.347	0.022162	0.0283396	0.0893427	36.5	192.5	148.9	85.7	21.43	15.78	8.29	15.13	High	High	High	High	High	High	High	High
FALSE	High	Master Protein	NP_524611.1	elongation factor 1alpha100E, isoform A [Drosophila melanogaster]	0	176.263	45	31	203	11	1	462	50.6	8.95	2831	31	4.071	4.246	2.741	0.0153388	0.0224811	0.026595	38.3	162.8	156.1	105.1	6.76	2.92	8.45	3.45	High	High	High	High	High	High	High	High
FALSE	Medium	Master Protein	NP_995623.2	uncharacterized protein Dmel_CG34394, isoform E [Drosophila melanogaster]	0.019	3.792	1	1	1	1	1	1249	136.5	8.32	27	1	4.058	6.651	5.537	0.561804	0.374568	0.448283	23.9	158.8	96.9	132.2	2.57	57.33	0.22	51.62	High	High	High	High	High	High	High	High
FALSE	High	Master Protein	NP_647927.3	uncharacterized protein Dmel_CG12493, isoform A [Drosophila melanogaster]	0.002	12.873	13	3	5	3	1	296	32.5	8.4	167	3	4.058	5.367	10.339	0.0926393	0.0774205	0.0461724	23.5	126.1	95.4	242.9	16.3	35.06	19.77	32.64	High	High	High	High	High	High	High	High
FALSE	High	Master Protein	NP_723966.1	imaginal disc growth factor 3, isoform B [Drosophila melanogaster]	0	93.265	36	19	93	19	1	441	49.2	7.53	2674	19	4.053	2.262	3.039	0.0679551	0.305856	0.155864	43.5	98.4	176.4	132.3	7.44	30.61	0.87	42.79	High	High	High	High	High	High	High	High
FALSE	High	Master Protein	NP_001263024.1	uncoordinated 80, isoform F [Drosophila melanogaster]	0.004	8.072	1	3	4	3	1	3332	370.6	8.12	117	3	4.047	2.036	2.334	0.206197	0.76265	0.610151	44.6	90.9	180.7	104.2	0.47	19.21	3.53	12.2	High	High	High	High	High	High	High	High
FALSE	High	Master Protein	NP_001036397.2	sarcolemma associated protein, isoform D [Drosophila melanogaster]	0	132.289	33	30	72	30	1	897	100.9	4.98	1449	30	4.045	4.071	6.558	0.0158364	0.0224811	0.018086	29.1	118.6	117.8	191	5.5	1.27	14.15	1.13	High	High	High	High	High	High	High	High
FALSE	High	Master Protein	NP_722780.1	testis EndoG-Like 1 [Drosophila melanogaster]	0.005	6.466	7	3	4	3	1	319	36	7.18	94	3	4.039	3.139	7.321	0.0988827	0.196473	0.0617628	30.5	95.7	123.1	223.2	6.35	11.04	26.21	5.51	High	High	High	High	High	High	High	High
FALSE	High	Master Protein	NP_650846.1	exit protein of rhodopsin and TRP A [Drosophila melanogaster]	0.002	12.192	33	3	5	3	1	116	13.4	9.07	83	3	4.029	2.857	2.658	0.0218385	0.0370242	0.051562	42.6	121.8	171.8	113.4	11.81	11.23	1.44	1.77	High	High	High	High	High	High	High	High
FALSE	High	Master Protein	NP_001287272.1	uncharacterized protein Dmel_CG42795, isoform G [Drosophila melanogaster]	0	170.514	17	50	85	50	1	3213	361.1	8.24	1052	50	4.008	3.243	4.35	0.0477327	0.0929859	0.0628258	34.8	112.8	139.4	151.3	18.49	0.93	20.66	13.06	High	High	High	High	High	High	High	High
FALSE	High	Master Protein	NP_648574.1	SET and MYND domain containing, class 4, member 2 [Drosophila melanogaster]	0.004	7.455	5	2	3	2	1	663	74.3	7.93	161	2	4.003	3.214	1.879	0.0218385	0.0407065	0.170194	44.9	144.4	179.9	84.4	31.89	8.47	3.93	9.27	High	High	High	High	High	High	High	High
FALSE	High	Master Protein	NP_001259083.1	Calcium/calmodulin-dependent protein kinase II, isoform L [Drosophila melanogaster]	0	64.86	30	15	36	3	1	522	59	7.31	704	15	3.989	2.898	3.088	0.0259897	0.0590404	0.0610389	40.8	118.4	162.9	126.1	5.53	25.08	5.33	21.12	High	High	High	High	High	High	High	High
FALSE	High	Master Protein	NP_524178.2	clathrin light chain, isoform A [Drosophila melanogaster]	0	61.812	34	10	53	10	1	219	23.8	4.78	1074	10	3.987	4.518	2.068	0.0372492	0.0407005	0.216454	39.6	178.7	157.7	81.8	4.69	22.39	9.58	7.48	High	High	High	High	High	High	High	High
FALSE	Medium	Master Protein	NP_650223.1	glycine N-methyltransferase [Drosophila melanogaster]	0.011	4.44	6	1	1	1	1	289	32.7	6.19	35	1	3.979	2.535	6.479	0.121158	0.355016	0.0794521	33.6	85.3	133.8	217.9	22.91	49.72	4.36	2.31	High	High	High	High	High	High	High	High
FALSE	High	Master Protein	NP_523460.2	synaptotagmin 1, isoform A [Drosophila melanogaster]	0	164.046	42	26	154	3	1	474	53.2	5.88	2559	26	3.978	3.019	3.811	0.0854055	0.182926	0.123066	38.5	116.3	153.3	146.9	26.93	5.99	1.56	6.92	High	High	High	High	High	High	High	High
FALSE	High	Master Protein	NP_001015499.4	male fertility factor kl5 [Drosophila melanogaster]	0.004	7.91	1	3	3	2	1	4559	525.9	5.76	73	3	3.976	5.243	7.118	0.0525573	0.044492	0.0418999	26.7	140	106.2	190.1	28.22	10.09	29.66	9.85	High	High	High	High	High	High	High	High
FALSE	High	Master Protein	NP_001261019.1	Stretchin-Mlck, isoform U [Drosophila melanogaster]	0	206.293	19	58	103	41	1	8255	923.2	5.12	1582	58	3.952	5.147	2.868	0.0218385	0.0224811	0.0457883	34.3	176.8	135.7	98.5	5.06	7.91	4.18	4.87	High	High	High	High	High	High	High	High
FALSE	High	Master Protein	NP_729446.1	arginine kinase, isoform A [Drosophila melanogaster]	0	478.451	58	54	586	8	1	562	61.2	7.49	11498	54	3.948	4.006	2.985	0.0149001	0.0224811	0.0186798	36.6	146.5	144.4	109.1	1.87	1.51	1.61	10.75	High	High	High	High	High	High	High	High
FALSE	High	Master Protein	NP_651447.2	uncharacterized protein Dmel_CG42235, isoform E [Drosophila melanogaster]	0	24.445	7	6	22	2	1	691	75.1	8.4	578	6	3.947	2.876	1.858	0.0218385	0.0371873	0.13145	44.2	127	174.3	82	17.11	18.98	13.04	10.31	High	High	High	High	High	High	High	High
FALSE	High	Master Protein	NP_511138.2	larval serum protein 1 alpha [Drosophila melanogaster]	0.002	14.758	4	4	6	2	1	816	98.8	6.14	112	4	3.945	1.245	0.768	0.256105	1	1	70.5	87.8	278	54.1	14.81	66.96	42.48	20.43	High	High	High	High	High	High	High	High
FALSE	High	Master Protein	NP_001097431.1	uncharacterized protein Dmel_CG34423, isoform A [Drosophila melanogaster]	0	26.713	83	7	20	7	1	65	6.8	9.09	363	7	3.944	1.855	3.025	0.136126	0.725347	0.26724	45.7	84.8	180.4	138.4	27.2	56.87	35.01	15.16	High	High	High	High	High	High	High	High
FALSE	High	Master Protein	NP_651632.2	aquarius [Drosophila melanogaster]	0.002	11.582	8	4	5	4	1	366	42.3	7.31	31	4	3.937	3.653	15.821	0.0472317	0.0718928	0.0238322	19.4	70.9	76.5	307.3	3.12	1.9	17.74	16.71	High	High	High	High	High	High	High	High
FALSE	High	Master Protein	NP_727901.1	clathrin heavy chain, isoform B [Drosophila melanogaster]	0	239.753	30	47	141	47	1	1678	191.1	5.72	3482	47	3.936	3.25	1.833	0.0216142	0.0356249	0.122303	45.5	148	179.2	83.4	9.42	22.95	14.35	2.64	High	High	High	High	High	High	High	High
FALSE	High	Master Protein	NP_725048.1	SET and MYND domain containing, class 4, member 3 [Drosophila melanogaster]	0.002	12.395	8	4	4	4	1	660	75.4	7.77	47	4	3.926	6.234	2.905	0.286581	0.1745	0.52269	33.3	207.4	130.6	96.7	39.16	5.42	19.66	26.24	High	High	High	High	High	High	High	High
FALSE	High	Master Protein	NP_001097349.1	uncharacterized protein Dmel_CG34460 [Drosophila melanogaster]	0.005	6.758	13	2	5	2	1	192	20.3	4.82	164	2	3.922	4.299	9.444	0.124106	0.12927	0.0577603	25.5	109.8	100.1	241.1	0.89	34.42	4.32	39.9	High	High	High	High	High	High	High	High
FALSE	High	Master Protein	NP_723468.1	junctophilin, isoform B [Drosophila melanogaster]	0	102.637	25	26	66	26	1	1054	115.9	9.91	1365	26	3.914	4.414	3.021	0.0289093	0.0356249	0.0661633	35.5	156.7	138.9	107.2	9.88	21.39	3.23	20.32	High	High	High	High	High	High	High	High
FALSE	High	Master Protein	NP_001246838.1	adenylyl cyclase 76E, isoform B [Drosophila melanogaster]	0	26.666	7	8	14	8	1	1312	143.3	6.16	312	8	3.913	2.201	2.389	0.0296845	0.134915	0.113537	46.4	102.3	181.7	111	8.27	0.67	3.62	0.62	High	High	High	High	High	High	High	High
FALSE	Low	Master Protein	NP_650842.2	CG4733, isoform B [Drosophila melanogaster]	0.051	2.376	1	1	1	1	1	888	97.8	7.91	21	1	3.909	4.831	3.63	0.0291969	0.0356249	0.0527938	33.3	161.1	130.3	121	5.56	36.47	11.11	3.7	High	High	High	High	High	High	High	High
FALSE	High	Master Protein	NP_001246470.1	inactivation no afterpotential D, isoform B [Drosophila melanogaster]	0	133.837	32	27	86	27	1	686	75.7	8.27	1194	27	3.898	2.339	1.991	0.0149001	0.0292474	0.0437391	46.5	108.9	181.5	92.7	10.1	3.55	7.62	13.84	High	High	High	High	High	High	High	High
FALSE	High	Master Protein	NP_001260394.1	cyclin Y, isoform B [Drosophila melanogaster]	0.002	12.191	9	3	8	3	1	406	45	6.7	267	3	3.889	2.572	2.164	0.0770875	0.234061	0.352579	46.8	120.4	182.1	101.3	20.86	2.07	19.78	28.97	High	High	High	High	High	High	High	High
FALSE	High	Master Protein	NP_650527.2	CG8927, isoform C [Drosophila melanogaster]	0	22.635	24	5	14	5	1	371	41.6	6.81	279	5	3.88	4.381	2.072	0.0218385	0.0301413	0.11203	39.4	172.7	152.9	81.7	0.2	21.17	13.67	21.66	High	High	High	High	High	High	High	High
FALSE	High	Master Protein	NP_732204.1	kugelkern, isoform B [Drosophila melanogaster]	0	36.258	25	12	23	12	1	570	60.1	5.48	464	12	3.874	4.722	2.459	0.0275163	0.0356249	0.0951291	36.4	171.8	140.9	89.4	7.19	0.26	9.97	6.06	High	High	High	High	High	High	High	High
FALSE	Medium	Master Protein	NP_001261188.1	enhancer of bithorax, isoform H [Drosophila melanogaster]	0.024	3.481	1	2	2	2	1	2761	311.2	8.27	22	2	3.867	3.322	3.131	0.0554207	0.095534	0.113537	37.8	125.7	146.3	118.5	21.52	26.6	16.9	23.9	High	High	High	High	High	High	High	High
FALSE	High	Master Protein	NP_476772.1	alpha-Tubulin at 84B [Drosophila melanogaster]	0	209.561	49	25	244	8	1	450	49.9	5.14	6508	25	3.849	2.758	1.958	0.0382808	0.0953885	0.248952	48.1	132.6	185	94.1	0.56	32.4	5.56	13.64	High	High	High	High	High	High	High	High
FALSE	High	Master Protein	NP_001260171.1	fibroblast growth factor receptor 1 oncogene partner 2, isoform B [Drosophila melanogaster]	0	28.079	23	6	11	6	1	315	35.1	4.65	214	6	3.846	4.351	4.254	0.0279774	0.0356249	0.0416796	31.6	137.5	121.5	134.4	0.35	18.8	11.01	5.22	High	High	High	High	High	High	High	High
FALSE	High	Master Protein	NP_001036357.2	bunched, isoform G [Drosophila melanogaster]	0.003	8.689	3	3	3	3	1	1331	138	6.28	120	3	3.824	4.065	3.954	0.187051	0.199077	0.209774	35.2	143.1	134.6	139.2	3.66	25.9	14.23	15.8	High	High	High	High	High	High	High	High
FALSE	Medium	Master Protein	NP_651986.2	Lk6 kinase, isoform A [Drosophila melanogaster]	0.022	3.607	2	2	2	2	1	1142	128.4	5.29	30	2	3.822	3.742	3.171	0.460924	0.534722	0.646311	33.5	125.2	127.9	106.1	28.41	28.07	14.31	23.82	High	High	High	High	High	High	High	High
FALSE	High	Master Protein	NP_001097249.1	TER94, isoform C [Drosophila melanogaster]	0	327.188	57	52	242	2	1	826	92	5.38	5347	52	3.822	4.465	7.059	0.118482	0.10964	0.0661633	28	125.2	107.1	197.9	5.43	37.31	17.78	37.43	High	High	High	High	High	High	High	High
FALSE	High	Master Protein	NP_001261414.1	syntaxin 17, isoform B [Drosophila melanogaster]	0.006	5.798	9	2	2	2	1	346	38.4	5.49	67	2	3.811	2.711	3.134	0.0225584	0.0534602	0.050719	41.7	113.1	159	130.8	0.55	27.28	3.84	7.73	High	High	High	High	High	High	High	High
FALSE	High	Master Protein	NP_001261800.1	uncharacterized protein Dmel_CG14109, isoform B [Drosophila melanogaster]	0	36.969	37	8	22	8	1	243	27.2	4.78	345	8	3.803	3.317	3.847	0.0275163	0.0443581	0.0457883	38.1	126.3	144.8	146.5	8.45	7.06	4.47	2.24	High	High	High	High	High	High	High	High
FALSE	High	Master Protein	NP_525069.2	no receptor potential A, isoform A [Drosophila melanogaster]	0	192.783	26	37	175	37	1	1095	124.8	7.01	2975	37	3.801	2.277	1.907	0.0218385	0.0784108	0.14249	47.9	109.1	182.1	91.4	13.46	9.76	6.53	3.24	High	High	High	High	High	High	High	High
FALSE	High	Master Protein	NP_001097706.1	uncharacterized protein Dmel_CG17816, isoform G [Drosophila melanogaster]	0	105.81	35	25	47	4	1	882	96.3	9.98	904	25	3.799	3.882	2.896	0.0382808	0.0469186	0.0880402	39.6	153.6	150.3	114.6	13.14	12.43	6.75	4.61	High	High	High	High	High	High	High	High
FALSE	High	Master Protein	NP_729489.1	CG3967, isoform B [Drosophila melanogaster]	0	35.974	23	7	19	1	1	291	32	9.5	339	7	3.797	3.275	2.1	0.0950968	0.150348	0.375341	43.4	142	164.7	91.1	17.9	30.46	4.9	35.96	High	High	High	High	High	High	High	High
FALSE	High	Master Protein	NP_648105.1	uncharacterized protein Dmel_CG43780, isoform A [Drosophila melanogaster]	0.007	5.367	10	2	5	2	1	162	19.2	7.21	47	2	3.771	4.164	2.978	0.0237725	0.0356249	0.0579658	37.2	154.8	140.2	110.7	11.9	7.13	10.53	19.28	High	High	High	High	High	High	High	High
FALSE	High	Master Protein	NP_001036566.4	phosphatidylinositol 4-phosphate 5-kinase at 59B, isoform I [Drosophila melanogaster]	0.002	12.549	8	3	5	3	1	781	86	8.76	150	3	3.754	3.606	4.124	0.17905	0.229704	0.182377	36.7	132.2	137.6	151.2	16.99	40.75	26.39	4.52	High	High	High	High	High	High	High	High
FALSE	High	Master Protein	NP_649651.2	uncharacterized protein Dmel_CG42564 [Drosophila melanogaster]	0.002	12.988	6	3	9	3	1	500	53.5	6.8	193	3	3.738	2.59	10.872	0.0441895	0.125201	0.0238667	26	67.4	97.3	283.1	8.74	6.4	2.84	17.28	High	High	High	High	High	High	High	High
FALSE	High	Master Protein	NP_731141.1	stranded at second, isoform B [Drosophila melanogaster]	0	44.103	9	11	21	11	1	1693	185.1	5.01	329	11	3.73	3.31	2.177	0.0218385	0.0356249	0.0788989	44.1	146	164.5	96	5.06	5.51	3.88	25.99	High	High	High	High	High	High	High	High
FALSE	Low	Master Protein	NP_648693.2	CG8100, isoform A [Drosophila melanogaster]	0.061	2.199	2	1	1	1	1	648	74.6	6.65	16	1	3.718	2.142	1.736	0.141935	0.52702	0.796639	52.2	111.8	194	90.6	21.85	39.55	32.67	5.12	High	High	High	High	High	High	High	High
FALSE	High	Master Protein	NP_609075.1	uncharacterized protein Dmel_CG11236, isoform A [Drosophila melanogaster]	0	69.441	36	11	77	11	1	341	37.6	7.05	2085	11	3.711	1.883	1.669	0.0386046	0.271089	0.413663	55.7	104.9	206.7	92.9	24.68	18.71	14.24	17.1	High	High	High	High	High	High	High	High
FALSE	High	Master Protein	NP_724417.3	uncharacterized protein Dmel_CG30438, isoform B [Drosophila melanogaster]	0.002	11.843	7	3	3	3	1	524	59.7	9.17	94	3	3.696	2.988	9.024	0.216824	0.371214	0.0819987	28.3	84.4	104.5	255	25.76	48.44	9.14	58.96	High	High	High	High	High	High	High	High
FALSE	High	Master Protein	NP_650796.1	CG5217 [Drosophila melanogaster]	0	32.308	26	4	13	4	1	215	23.6	4.91	225	4	3.687	4.689	6.517	0.0167214	0.0224811	0.018086	29.4	137.8	108.3	191.5	2.81	3.89	16.55	3.13	High	High	High	High	High	High	High	High
FALSE	Low	Master Protein	NP_610261.1	serpin 43Ad [Drosophila melanogaster]	0.055	2.289	2	1	1	1	1	407	44.8	6.47	34	1	3.675	3.097	0.508	0.0174167	0.0280995	0.0644306	52.8	163.5	194.1	26.8	1.69	18.13	2.64	12.56	High	High	High	High	High	High	High	High
FALSE	High	Master Protein	NP_729454.1	uncharacterized protein Dmel_CG32032 [Drosophila melanogaster]	0.002	11.92	12	4	12	4	1	286	32.2	7.72	132	4	3.663	2.306	2.194	0.0149001	0.0224811	0.0238667	49	113	179.5	107.5	0.42	11.06	5.87	7.03	High	High	High	High	High	High	High	High
FALSE	High	Master Protein	NP_001261474.1	Ecdysone-inducible gene L3, isoform B [Drosophila melanogaster]	0	20.28	14	4	13	4	1	332	35.5	7.08	501	4	3.661	2.672	2.792	0.0156152	0.0280995	0.0238917	45.4	121.2	166.1	126.6	6.03	17.19	5.91	7.1	High	High	High	High	High	High	High	High
FALSE	Medium	Master Protein	NP_728477.1	dynein intermediate chain at 61B, isoform A [Drosophila melanogaster]	0.044	2.575	2	1	1	1	1	764	87	6.21	40	1	3.651	4.566	5.976	0.170135	0.138393	0.099742	30.3	138.3	110.6	181	43.03	33.94	21.02	3.84	High	High	High	High	High	High	High	High
FALSE	High	Master Protein	NP_649685.1	CG1979 [Drosophila melanogaster]	0	66.478	26	19	23	19	1	1047	115.1	8.1	346	19	3.649	10.787	9.893	0.023324	0.0224811	0.0191806	18.9	203.3	68.8	186.5	3.18	19.53	17.48	7.04	High	High	High	High	High	High	High	High
FALSE	Low	Master Protein	NP_001246141.1	uncharacterized protein Dmel_CG17508, isoform B [Drosophila melanogaster]	0.073	1.915	4	1	1	1	1	194	21.5	7.42	26	1	3.635	3.338	5.082	0.0477327	0.0750244	0.0470872	35.5	118.5	129.1	180.5	17.81	2.76	4.16	2.47	High	High	High	High	High	High	High	High
FALSE	Medium	Master Protein	NP_001246287.1	uncharacterized protein Dmel_CG17574, isoform I [Drosophila melanogaster]	0.045	2.47	6	1	1	1	1	175	18.8	7.69	26	1	3.633	3.469	2.759	0.124694	0.164853	0.262441	37.3	129.4	135.5	102.9	2.17	29.33	11.05	21.46	High	High	High	High	High	High	High	High
FALSE	High	Master Protein	NP_001261317.1	zormin, isoform J [Drosophila melanogaster]	0	99.251	10	30	39	30	1	3664	412.6	6.46	904	30	3.627	3.027	1.976	0.0149001	0.0224811	0.0357967	45.5	137.8	165.1	90	7.01	10.02	10.85	0.35	High	High	High	High	High	High	High	High
FALSE	High	Master Protein	NP_001246441.1	CG8654, isoform B [Drosophila melanogaster]	0	21.639	9	5	15	5	1	502	55.5	8.62	357	5	3.605	1.622	0.587	0.0167214	0.0970014	0.0819987	64.2	104.1	231.4	37.7	11.76	16.43	7.7	0.68	High	High	High	High	High	High	High	High
FALSE	High	Master Protein	NP_001259597.1	uncharacterized protein Dmel_CG42354, isoform F [Drosophila melanogaster]	0	80.109	33	18	45	18	1	503	56.7	6.07	803	18	3.602	3.84	2.951	0.0664046	0.0787645	0.136878	38.5	148	138.9	113.8	8.34	30.34	3.31	21.92	High	High	High	High	High	High	High	High
FALSE	High	Master Protein	NP_648748.1	uncharacterized protein Dmel_CG13458 [Drosophila melanogaster]	0.002	13.779	12	5	5	5	1	634	72.3	8.16	89	5	3.59	5.414	3.186	0.0167214	0.0224811	0.0238667	34.9	189	125.3	111.2	2.63	20.52	4.59	4.28	High	High	High	High	High	High	High	High
FALSE	High	Master Protein	NP_788898.1	adenine nucleotide translocase 2, isoform B [Drosophila melanogaster]	0	43.124	21	8	143	3	1	307	33.7	9.57	2426	8	3.585	3.784	6.372	0.0406154	0.0469186	0.0345924	32.1	121.5	115.1	204.6	14.9	34.14	15.98	14.94	High	High	High	High	High	High	High	High
FALSE	High	Master Protein	NP_649756.2	CG2698, isoform A [Drosophila melanogaster]	0.002	12.535	5	4	7	2	1	817	91.8	6.2	102	4	3.579	3.147	3.725	0.0536026	0.0910874	0.0710546	40.4	127.3	144.7	150.6	3.95	6.53	9.64	17.1	High	High	High	High	High	High	High	High
FALSE	High	Master Protein	NP_001260318.1	repressor splicing factor 1, isoform B [Drosophila melanogaster]	0	17.056	24	6	7	6	1	200	21.4	10.56	133	6	3.575	2.914	2.826	0.0650715	0.128869	0.143091	42.2	123	151	119.3	18.47	1.72	18.27	14.62	High	High	High	High	High	High	High	High
FALSE	High	Master Protein	NP_652049.1	quasimodo, isoform A [Drosophila melanogaster]	0	16.409	18	5	6	5	1	414	45.5	6.14	153	5	3.562	4.312	1.94	0.0354004	0.035941	0.207905	42.5	183.1	151.2	82.4	7.04	25.72	4.5	23.11	High	High	High	High	High	High	High	High
FALSE	High	Master Protein	NP_001027446.2	Rad, Gem/Kir family member 3, isoform F [Drosophila melanogaster]	0	19.368	12	5	13	5	1	449	49.4	9.35	410	5	3.562	2.214	1.933	0.0289093	0.108331	0.173376	50.3	111.4	179.2	97.2	12.67	13.75	1.27	3.26	High	High	High	High	High	High	High	High
FALSE	High	Master Protein	NP_001137817.1	phosphodiesterase 1c, isoform E [Drosophila melanogaster]	0	21.542	8	6	9	6	1	1173	124.7	5.95	240	6	3.538	1.98	3.198	0.0153388	0.0356249	0.0195785	47.1	93.2	166.6	150.6	1.09	1.07	0.06	2.68	High	High	High	High	High	High	High	High
FALSE	High	Master Protein	NP_001138111.1	uncharacterized protein Dmel_CG42235, isoform B [Drosophila melanogaster]	0	29.305	8	8	28	4	1	695	74.6	6.25	613	8	3.536	1.378	2.549	0.0192319	0.338046	0.0391428	52.5	72.3	185.7	133.8	17.96	4.48	15.96	0.96	High	High	High	High	High	High	High	High
FALSE	High	Master Protein	NP_001285987.1	yellow-b, isoform B [Drosophila melanogaster]	0	43.076	30	12	19	12	1	453	51	5.97	429	12	3.531	2.564	2.316	0.0218385	0.0443581	0.0649011	48.3	123.7	170.4	111.8	1.93	24.93	0.32	11.66	High	High	High	High	High	High	High	High
FALSE	High	Master Protein	NP_652635.2	lectin-30A [Drosophila melanogaster]	0.004	8.039	14	2	2	2	1	223	26.3	8.24	59	2	3.519	2.387	11.017	0.0805678	0.245186	0.034933	26.5	63.3	93.3	292.1	42.28	29.37	4.64	21.27	High	High	High	High	High	High	High	High
FALSE	High	Master Protein	NP_001287175.1	holocarboxylase synthetase, isoform C [Drosophila melanogaster]	0	70.202	20	19	31	19	1	1047	116.5	7.15	399	19	3.517	3.865	3.674	0.0327576	0.0367979	0.0480433	35.9	138.9	126.4	132.1	8.86	11.04	4.28	9.69	High	High	High	High	High	High	High	High
FALSE	High	Master Protein	NP_572210.1	CG3323 [Drosophila melanogaster]	0	16.334	10	8	10	8	1	749	83.6	8.73	126	8	3.499	2.829	8.391	0.0804517	0.159401	0.0412867	30	84.8	104.9	251.5	31.19	0.34	14.4	20.58	High	High	High	High	High	High	High	High
FALSE	High	Master Protein	NP_650378.1	CG7886 [Drosophila melanogaster]	0	20.593	8	6	7	6	1	818	92.7	6.34	182	6	3.498	3.053	5.457	0.0289093	0.0474343	0.0281458	35.6	108.5	124.3	194	5.96	9.06	30.57	15.19	High	High	High	High	High	High	High	High
FALSE	High	Master Protein	NP_723603.1	uncharacterized protein Dmel_CG31872, isoform A [Drosophila melanogaster]	0	115.437	24	20	51	20	1	1073	119.1	4.78	1643	20	3.493	3.023	20.781	0.0218385	0.0356249	0.018086	17.1	51.7	59.8	355.7	1.57	19.06	10.95	13.54	High	High	High	High	High	High	High	High
FALSE	High	Master Protein	NP_612023.1	tiny tim 2 [Drosophila melanogaster]	0.006	5.606	6	2	7	1	1	409	47.7	8.7	115	2	3.488	3.191	3.556	0.0349623	0.0525678	0.0529387	40.9	130.4	142.5	145.3	21.39	8.87	31.32	1.6	High	High	High	High	High	High	High	High
FALSE	High	Master Protein	NP_647635.1	uncharacterized protein Dmel_CG13928 [Drosophila melanogaster]	0.005	6.393	9	4	5	4	1	245	27.2	8.34	71	4	3.479	3.471	2.298	0.0167214	0.0224811	0.0411584	44.1	153.1	153.5	101.4	10.11	11.88	3.38	11.67	High	High	High	High	High	High	High	High
FALSE	High	Master Protein	NP_001246239.2	CAP, isoform X [Drosophila melanogaster]	0	64.788	11	22	26	7	1	2505	282.4	5.95	396	22	3.476	4.058	3.544	0.0412584	0.0417466	0.0600275	35.6	144.4	123.7	126.2	3.13	6.72	1.86	14.2	High	High	High	High	High	High	High	High
FALSE	Medium	Master Protein	NP_648179.3	uncharacterized protein Dmel_CG13676, isoform A [Drosophila melanogaster]	0.011	4.617	3	1	1	1	1	883	99.1	6.86	59	1	3.475	3.958	2.219	0.209089	0.196479	0.574659	43.7	173.1	152	97.1	56.38	27.73	6.36	37.87	High	High	High	High	High	High	High	High
FALSE	High	Master Protein	NP_650817.1	uncharacterized protein Dmel_CG17752 [Drosophila melanogaster]	0	23.678	8	4	11	4	1	538	60.3	7.77	415	4	3.475	1.305	0.526	0.0697807	1	0.395348	71.1	92.8	247.2	37.4	12.57	5.74	4.26	3.33	High	High	High	High	High	High	High	High
FALSE	High	Master Protein	NP_730785.1	auxilin, isoform A [Drosophila melanogaster]	0.006	5.794	2	2	2	2	1	1165	127.8	6.33	29	2	3.47	3.345	2.918	0.178389	0.228018	0.293219	40.5	135.4	140.5	118.2	4.38	17.65	3.83	2.57	High	High	High	High	High	High	High	High
FALSE	High	Master Protein	NP_001261952.1	multiprotein bridging factor 1, isoform E [Drosophila melanogaster]	0	38.722	39	10	22	10	1	188	20.4	10.23	484	10	3.466	2.806	2.493	0.0864407	0.168564	0.222883	44.5	124.8	154.2	110.9	1.6	38.55	5.23	19.43	High	High	High	High	High	High	High	High
FALSE	High	Master Protein	NP_648358.2	Z band alternatively spliced PDZ-motif protein 67, isoform G [Drosophila melanogaster]	0	27.101	13	9	12	9	1	730	81	4.73	153	9	3.462	3.813	2.524	0.0494576	0.0533896	0.138084	41.2	157.1	142.6	104	21	20.65	4.59	9.31	High	High	High	High	High	High	High	High
FALSE	High	Master Protein	NP_610041.1	uncharacterized protein Dmel_CG17470 [Drosophila melanogaster]	0	17.594	17	5	7	5	1	215	24.2	4.77	140	5	3.461	4.556	6.712	0.0345227	0.0356249	0.0259911	29.4	133.8	101.6	197.1	24.31	18.1	12.05	1.84	High	High	High	High	High	High	High	High
FALSE	High	Master Protein	NP_001246446.1	glycogenin, isoform D [Drosophila melanogaster]	0	26.267	12	8	21	2	1	545	61.7	5.6	294	8	3.455	1.763	2.455	0.185155	0.818489	0.427033	50.3	88.7	173.8	123.5	34.17	33.05	1.8	53.18	High	High	High	High	High	High	High	High
FALSE	High	Master Protein	NP_001033916.1	uncharacterized protein Dmel_CG34051, isoform A [Drosophila melanogaster]	0	16.765	13	4	13	4	1	223	26.3	9.94	132	4	3.454	3.223	18.445	0.0384477	0.0550016	0.0186798	18.4	59.2	63.4	338.5	6.73	6.7	19.47	25.87	High	High	High	High	High	High	High	High
FALSE	High	Master Protein	NP_001163433.1	Autophagy-related 1, isoform B [Drosophila melanogaster]	0.006	5.403	2	2	2	2	1	855	92.7	8.46	46	2	3.442	3.349	2.322	0.0224354	0.0356249	0.0727387	44.6	149.5	153.7	103.7	3.9	27.01	5.52	14.93	High	High	High	High	High	High	High	High
FALSE	High	Master Protein	NP_001247291.1	uncharacterized protein Dmel_CG43222, isoform A [Drosophila melanogaster]	0.002	8.944	19	2	4	2	1	64	6.3	8	167	2	3.441	4.544	3.752	0.316143	0.238278	0.314539	36.6	166.4	126	137.4	6.65	61.88	12.53	37.95	High	High	High	High	High	High	High	High
FALSE	High	Master Protein	NP_726636.2	Calcium/calmodulin-dependent protein kinase II, isoform E [Drosophila melanogaster]	0	69.603	31	16	41	4	1	509	57.5	7.31	782	16	3.44	2.175	2.144	0.0609045	0.235235	0.241384	51.3	111.6	176.5	110	3.32	37.79	14.36	27.63	High	High	High	High	High	High	High	High
FALSE	High	Master Protein	NP_001260958.1	CG6191, isoform C [Drosophila melanogaster]	0.006	6.069	3	3	4	3	1	746	82.5	9.76	26	3	3.43	2.852	2.509	0.0557304	0.105752	0.148085	46.1	131.5	158.2	115.7	1.63	19.72	14.51	12.95	High	High	High	High	High	High	High	High
FALSE	High	Master Protein	NP_650760.1	uncharacterized protein Dmel_CG14291 [Drosophila melanogaster]	0	25.484	15	8	12	8	1	524	59.9	7.08	257	8	3.426	2.369	0.883	0.0204625	0.037808	1	57.5	136.3	197	50.8	0.32	1.78	14.48	11.16	High	High	High	High	High	High	High	High
FALSE	High	Master Protein	NP_001286014.1	dorsal, isoform F [Drosophila melanogaster]	0	57.455	19	15	22	15	1	999	111.5	5.38	459	15	3.417	3.26	2.821	0.0251676	0.0369443	0.0581133	42.4	138.2	144.9	119.6	8.39	13.39	20.67	8.02	High	High	High	High	High	High	High	High
FALSE	High	Master Protein	NP_001261826.1	Fat body protein 1, isoform D [Drosophila melanogaster]	0	437.045	49	66	433	1	1	1027	119.4	6.47	12256	66	3.417	1.904	4.809	0.0791414	0.423388	0.0646921	39.9	76	136.3	191.9	10.16	25.42	31.33	29.55	High	High	High	High	High	High	High	High
FALSE	High	Master Protein	NP_730196.1	neurotactin, isoform A [Drosophila melanogaster]	0	96.363	22	18	60	18	1	846	92.7	5.3	1269	18	3.417	2.869	2.439	0.0233116	0.0428614	0.068188	44.4	127.4	151.7	108.3	4.68	0.96	1.23	5.28	High	High	High	High	High	High	High	High
FALSE	Medium	Master Protein	NP_611110.2	CG7755 [Drosophila melanogaster]	0.017	4.181	4	1	2	1	1	378	41.8	7.61	100	1	3.409	5.159	5.577	0.139886	0.0850428	0.0819987	30.9	159.7	105.5	172.6	41.08	29.66	29.78	32.89	High	High	High	High	High	High	High	High
FALSE	High	Master Protein	NP_723791.2	phosphoethanolamine cytidylyltransferase, isoform C [Drosophila melanogaster]	0	44.626	26	10	22	10	1	374	42	6.54	386	10	3.408	3.292	6.704	0.0164908	0.0224811	0.018086	32.5	106.9	110.7	217.7	1.64	3.69	15.11	5.07	High	High	High	High	High	High	High	High
FALSE	High	Master Protein	NP_001286397.1	regulatory particle non-ATPase 13, isoform G [Drosophila melanogaster]	0	63.711	53	17	32	3	1	424	45.5	5.96	824	17	3.403	2.794	2.321	0.0215275	0.0356249	0.0513013	45.4	126.8	154.5	105.4	20.67	13.36	3.09	0.75	High	High	High	High	High	High	High	High
FALSE	High	Master Protein	NP_001286835.1	beta-Tubulin at 60D, isoform B [Drosophila melanogaster]	0	114.833	26	13	247	1	1	453	50.7	4.88	5615	13	3.4	3.228	2.727	0.0578338	0.0824404	0.126353	45.2	146	153.8	123.4	16.29	2.49	29.8	19.06	High	High	High	High	High	High	High	High
FALSE	High	Master Protein	NP_001245414.1	CG1674, isoform L [Drosophila melanogaster]	0	56.731	16	15	25	15	1	905	101.6	7.33	571	15	3.393	3.243	2.422	0.0233116	0.0356249	0.0684459	44.8	145.1	151.9	108.4	3.18	14.84	15.86	7.68	High	High	High	High	High	High	High	High
FALSE	Medium	Master Protein	NP_726727.1	uncharacterized protein Dmel_CG11412, isoform A [Drosophila melanogaster]	0.019	3.792	7	1	2	1	1	377	42.2	7.49	16	1	3.388	4.785	2.215	0.495282	0.355111	0.899206	37	177	125.3	81.9	51.15	36.98	42.64	60.31	High	High	High	High	High	High	High	High
FALSE	High	Master Protein	NP_477401.2	SET domain binding factor, isoform A [Drosophila melanogaster]	0.002	12.217	2	5	5	5	1	1993	224.9	7.11	101	5	3.387	2.898	3.205	0.0322319	0.0537994	0.0562368	41.7	120.7	141.1	133.5	14.64	20.14	3.98	8.09	High	High	High	High	High	High	High	High
FALSE	High	Master Protein	NP_611738.1	CG3788, isoform A [Drosophila melanogaster]	0	16.051	19	6	8	6	1	378	41.6	5.95	121	6	3.382	3.035	4.464	0.0477759	0.0791012	0.0494032	38.7	117.6	131	173	2.34	29.32	18.75	13.44	High	High	High	High	High	High	High	High
FALSE	High	Master Protein	NP_001097389.1	RIC3 acetylcholine receptor chaperone, isoform E [Drosophila melanogaster]	0	52.39	25	11	29	1	1	481	52.8	6.49	668	11	3.381	4.26	2.659	0.0786699	0.0671812	0.171923	39.9	169.8	134.8	106	3.43	23.85	1.04	18.29	High	High	High	High	High	High	High	High
FALSE	High	Master Protein	NP_787968.1	Leucyl-tRNA synthetase, isoform A [Drosophila melanogaster]	0	76.467	20	21	38	21	1	1182	134.8	7.64	696	21	3.38	1.292	1.445	0.0326185	0.863631	0.555317	61.2	79	206.7	88.4	3.56	29.83	6.23	19.83	High	High	High	High	High	High	High	High
FALSE	High	Master Protein	NP_524106.3	failed axon connections, isoform A [Drosophila melanogaster]	0	234.897	62	40	187	40	1	418	47.1	5.25	3451	40	3.38	2.749	1.942	0.181204	0.32107	0.659938	50.6	139	170.9	98.2	19.89	35.54	8.84	40.93	High	High	High	High	High	High	High	High
FALSE	High	Master Protein	NP_001246662.1	Ectoderm-expressed 4, isoform I [Drosophila melanogaster]	0.002	12.801	3	5	5	5	1	1730	186.3	7.71	61	5	3.379	3.798	4.22	0.0893961	0.0913652	0.0819987	35	132.9	118.3	147.7	22.49	3.37	10.52	5.14	High	High	High	High	High	High	High	High
FALSE	High	Master Protein	NP_476942.1	cactus, isoform B [Drosophila melanogaster]	0	30.558	19	7	9	7	1	500	53.8	4.84	345	7	3.367	3.344	2.731	0.0758628	0.0982665	0.156977	41.4	138.3	139.2	112.9	41.82	8.53	16.02	8.62	High	High	High	High	High	High	High	High
FALSE	High	Master Protein	NP_476863.1	inactivation no afterpotential C [Drosophila melanogaster]	0	69.052	17	15	34	15	1	700	79.8	7.46	921	15	3.362	2.223	1.984	0.0153933	0.0313543	0.0414859	50.4	112	169.3	99.9	9.02	9.92	4.73	11.62	High	High	High	High	High	High	High	High
FALSE	Medium	Master Protein	NP_610442.2	Ance-4, isoform A [Drosophila melanogaster]	0.021	3.684	2	1	1	1	1	609	70.1	6.15	55	1	3.36	4.623	3.108	0.0245205	0.0280995	0.0469421	38.5	178	129.4	119.7	3.16	14.49	0.36	28.43	High	High	High	High	High	High	High	High
FALSE	High	Master Protein	NP_001246229.1	bruchpilot, isoform K [Drosophila melanogaster]	0	671.3	62	155	512	1	1	1707	197.3	6.35	7462	155	3.36	2.294	3.299	0.049256	0.158013	0.0733878	44.4	101.9	149.3	146.6	14.69	9.35	3.8	11.42	High	High	High	High	High	High	High	High
FALSE	High	Master Protein	NP_001014681.2	darkener of apricot, isoform P [Drosophila melanogaster]	0.002	13.697	2	4	6	2	1	2045	226.5	9.33	138	4	3.353	6.501	4.476	0.0511538	0.0356249	0.0513851	30.1	195.9	101	134.9	26.25	35.13	5.25	9.9	High	High	High	High	High	High	High	High
FALSE	High	Master Protein	NP_001262458.1	uncharacterized protein Dmel_CG43143, isoform I [Drosophila melanogaster]	0	23.437	3	7	11	7	1	2556	277	9.41	356	7	3.35	4.007	3.078	0.0466736	0.0443581	0.0796503	38.5	154.3	129	118.5	2.57	14.23	6.27	19.09	High	High	High	High	High	High	High	High
FALSE	High	Master Protein	NP_726633.2	Calcium/calmodulin-dependent protein kinase II, isoform A [Drosophila melanogaster]	0	60.115	29	13	34	2	1	490	55.4	7.44	750	13	3.348	2.474	3.509	0.0734317	0.187512	0.091439	44.5	110.2	149.1	156.3	29.58	39.09	14.78	3.33	High	High	High	High	High	High	High	High
FALSE	High	Master Protein	NP_649459.4	CG1090, isoform G [Drosophila melanogaster]	0	24.689	9	4	32	4	1	633	69.5	4.79	998	4	3.345	2.772	2.154	0.0936746	0.174812	0.326993	48.6	134.8	162.7	104.7	26.49	9.56	6.28	0.94	High	High	High	High	High	High	High	High
FALSE	High	Master Protein	NP_001261659.1	uncharacterized protein Dmel_CG43897, isoform M [Drosophila melanogaster]	0	15.832	3	2	6	2	1	1385	154.5	7.05	164	2	3.341	3.443	1.445	0.186276	0.20803	1	46.3	159.6	154.8	66.9	0.09	40.44	52.15	2.89	High	High	High	High	High	High	High	High
FALSE	High	Master Protein	NP_001138150.1	uncharacterized protein Dmel_CG10804, isoform C [Drosophila melanogaster]	0.006	5.6	3	2	3	2	1	726	80.9	5.11	65	2	3.335	2.757	3.041	0.0218385	0.0356249	0.0357967	44	121.4	146.8	133.9	8.27	8.31	12.58	1.99	High	High	High	High	High	High	High	High
FALSE	Medium	Master Protein	NP_524705.1	slowmo, isoform B [Drosophila melanogaster]	0.031	3.161	4	2	2	2	1	215	24.3	8.41	26	2	3.333	1.486	1.462	0.0218385	0.28402	0.308258	65.1	96.7	217	95.1	9.68	9.05	0.06	14.84	High	High	High	High	High	High	High	High
FALSE	High	Master Protein	NP_651143.2	CG4393, isoform B [Drosophila melanogaster]	0.002	9.359	2	3	3	3	1	1325	144.7	8.44	41	3	3.324	2.719	2.235	0.0183982	0.0312155	0.0460499	48.3	131.4	160.6	108	7.85	5.04	12.46	6.72	High	High	High	High	High	High	High	High
FALSE	High	Master Protein	NP_608729.1	CG8814 [Drosophila melanogaster]	0	36.845	20	8	40	8	1	324	36.3	6.29	822	8	3.324	3.441	2.96	0.0439692	0.0526973	0.0796503	41.6	143.2	138.3	123.2	27.47	12.09	0.84	20.36	High	High	High	High	High	High	High	High
FALSE	High	Master Protein	NP_001259660.1	beta spectrin, isoform B [Drosophila melanogaster]	0	1177.23	64	194	930	6	1	2308	267.5	5.33	18460	194	3.322	2.692	3.044	0.0267119	0.0525678	0.0509246	44.9	120.8	149.1	136.6	10.09	2.03	10.29	1.46	High	High	High	High	High	High	High	High
FALSE	High	Master Protein	NP_511062.1	serine pyruvate aminotransferase [Drosophila melanogaster]	0	43.382	29	9	33	9	1	394	43.8	7.71	691	9	3.321	3.08	2.254	0.0760225	0.112472	0.241643	47.4	145.9	157.4	106.8	7.87	4.96	4.42	50.47	High	High	High	High	High	High	High	High
FALSE	High	Master Protein	NP_732375.1	CG7720, isoform A [Drosophila melanogaster]	0.002	10.823	4	2	6	2	1	681	74.6	8.06	119	2	3.316	2.294	2.722	0.0944148	0.27668	0.182377	46.8	107.4	155.2	127.4	27.81	16.04	18.48	13.63	High	High	High	High	High	High	High	High
FALSE	High	Master Protein	NP_001247027.1	skeletor, isoform E [Drosophila melanogaster]	0	19.235	4	6	10	6	1	1503	164.9	6.65	141	6	3.314	3.507	2.09	0.0511538	0.0594254	0.211064	45.1	158.2	149.5	94.3	1.42	13.47	2.45	28.42	High	High	High	High	High	High	High	High
FALSE	High	Master Protein	NP_001188515.1	plasma membrane calcium ATPase, isoform P [Drosophila melanogaster]	0	400.613	41	57	382	4	1	1194	131.5	6.4	8748	57	3.303	2.497	2.476	0.0201897	0.0356249	0.0411584	47.7	119.2	157.7	118.2	11.39	1.08	0.88	3.57	High	High	High	High	High	High	High	High
FALSE	High	Master Protein	NP_611842.1	decapping protein 1, isoform A [Drosophila melanogaster]	0	16.784	16	5	7	5	1	372	41.3	7.17	131	5	3.302	4.03	3.317	0.0654693	0.0578109	0.0888949	37.1	149.6	122.5	123.1	25.48	13.19	3.26	10.84	High	High	High	High	High	High	High	High
FALSE	High	Master Protein	NP_001261394.1	uncharacterized protein Dmel_CG18869, isoform B [Drosophila melanogaster]	0	20.322	10	5	12	5	1	583	66.1	6.49	239	5	3.302	2.351	5.551	0.0322937	0.0888369	0.0271501	38.9	91.4	128.4	215.9	6.44	18.88	9.32	3.64	High	High	High	High	High	High	High	High
FALSE	High	Master Protein	NP_569952.2	vacuolar protein sorting 26 [Drosophila melanogaster]	0.002	15.259	7	3	8	3	1	478	52.6	6.39	216	3	3.291	2.715	3.048	0.076384	0.147742	0.121718	42.8	116.3	141	130.6	6.03	13.63	11.46	11.3	High	High	High	High	High	High	High	High
FALSE	High	Master Protein	NP_001096948.2	uncharacterized protein Dmel_CG43901, isoform A [Drosophila melanogaster]	0.005	6.863	2	2	2	2	1	2281	244.2	5.66	31	2	3.29	2.618	2.543	0.0837757	0.175587	0.191037	45.8	119.8	150.6	116.4	24.5	40.72	5.03	10.15	High	High	High	High	High	High	High	High
FALSE	High	Master Protein	NP_001286024.1	reduced ocelli, isoform B [Drosophila melanogaster]	0.002	13.448	7	4	5	4	1	757	84.6	7.09	111	4	3.285	2.607	2.12	0.0431526	0.0917411	0.167107	48.9	127.6	160.7	103.7	14.16	25.7	0.3	20.43	High	High	High	High	High	High	High	High
FALSE	High	Master Protein	NP_001285041.1	uncharacterized protein Dmel_CG15369, isoform B [Drosophila melanogaster]	0	16.013	37	3	10	3	1	122	13.2	5.87	551	3	3.28	4.003	2.834	0.0700088	0.0627552	0.131956	41	164	134.3	116.1	11.87	35.11	16.12	29.16	High	High	High	High	High	High	High	High
FALSE	High	Master Protein	NP_995620.1	uncharacterized protein Dmel_CG33281 [Drosophila melanogaster]	0	26.558	9	6	12	6	1	467	50.6	6.21	363	6	3.276	1.852	3.243	0.0582246	0.336931	0.0819987	47.5	88	155.6	154.1	20.87	34.33	1.01	24.37	High	High	High	High	High	High	High	High
FALSE	High	Master Protein	NP_652662.1	larval cuticle protein [Drosophila melanogaster]	0.004	7.76	42	3	3	3	1	105	11.2	4.25	76	3	3.276	1.055	5.873	0.714205		0.460318	41.3	43.6	135.4	242.7	31.38		51.51	94.5	High	High	Not Found	High	High	High	High	High
FALSE	Medium	Master Protein	NP_649415.2	CG7369 [Drosophila melanogaster]	0.019	3.792	1	1	1	1	1	680	75.7	7.65	34	1	3.253	2.151	1.852	0.13154	0.40468	0.585437	55.2	118.7	179.6	102.2	5.6	34.9	11.82	17.42	High	High	High	High	High	High	High	High
FALSE	High	Master Protein	NP_001246859.1	uncharacterized protein Dmel_CG10508, isoform K [Drosophila melanogaster]	0	21.666	9	6	9	1	1	733	80.7	9.35	212	6	3.248	3.078	2.257	0.0224354	0.0356249	0.0708672	43.1	132.8	140.1	97.4	11.34	18.24	20.99	2.77	High	High	High	High	High	High	High	High
FALSE	High	Master Protein	NP_995925.2	uncharacterized protein Dmel_CG44252, isoform E [Drosophila melanogaster]	0.002	10.632	6	4	11	3	1	714	78.5	8.38	209	4	3.244	3.386	4.464	0.063721		0.0602382	37.5	127.1	121.7	167.5	0.94		29.86	18.46	High	High	High	High	High	High	High	High
FALSE	Low	Master Protein	NP_733334.1	tace, isoform A [Drosophila melanogaster]	0.063	2.173	1	1	1	1	1	732	83	7.18	27	1	3.242	2.942	1.653	0.168192	0.244365	0.834996	51.9	152.6	168.2	85.8	17.42	5.35	14.75	3.16	High	High	High	High	High	High	High	High
FALSE	High	Master Protein	NP_523636.1	tetraspanin 42Ej [Drosophila melanogaster]	0.004	7.948	5	2	7	2	1	227	25.3	6.93	52	2	3.236	1.94	2.527	0.523015	1	0.781862	50.2	97.4	162.4	126.8	22.46	53.8	19.85	26.15	High	High	High	High	High	High	High	High
FALSE	High	Master Protein	NP_611341.1	uncharacterized protein Dmel_CG10924, isoform A [Drosophila melanogaster]	0	101.471	39	22	63	20	1	638	70.6	7.56	1346	22	3.235	2.361	0.76	0.0149001	0.0224811	0.173594	60.4	142.7	195.5	46	3.56	10.48	3.78	1.37	High	High	High	High	High	High	High	High
FALSE	High	Master Protein	NP_001097775.2	uncharacterized protein Dmel_CG34383, isoform I [Drosophila melanogaster]	0.002	12.246	2	4	4	4	1	3090	342.9	6.64	71	4	3.229	4.159	2.607	0.0498586	0.0428614	0.112303	40.5	168.3	130.7	105.5	0.6	4.41	12.23	18.49	High	High	High	High	High	High	High	High
FALSE	High	Master Protein	NP_610178.2	CG8245 [Drosophila melanogaster]	0.004	8.103	12	3	4	3	1	343	39.1	8.32	34	3	3.229	2.32	3.446	0.0564852	0.160316	0.0708672	45.8	106.4	148	158	4.38	32.72	1.59	22.94	High	High	High	High	High	High	High	High
FALSE	High	Master Protein	NP_647620.1	pinstripe, isoform A [Drosophila melanogaster]	0.008	5.289	1	2	2	2	1	1449	163.3	8.21	62	2	3.227	3.007	2.448	0.0174167	0.0245787	0.034933	46.8	140.6	150.9	114.4	2.59	2.57	7.15	0.08	High	High	High	High	High	High	High	High
FALSE	High	Master Protein	NP_610213.1	tomboy40 [Drosophila melanogaster]	0	26.169	16	5	12	4	1	340	37	8.69	417	5	3.227	3.084	6.313	0.0218385	0.0320644	0.0186798	33.5	103.2	108	211.3	0.59	11.18	14.08	11.59	High	High	High	High	High	High	High	High
FALSE	High	Master Protein	NP_001287274.1	uncharacterized protein Dmel_CG45076, isoform E [Drosophila melanogaster]	0	46.967	38	13	41	3	1	343	38.8	10.07	626	13	3.224	2.429	0.921	0.0236066	0.0550678	1	57.1	138.6	184	52.6	3.79	10.56	13.46	10.57	High	High	High	High	High	High	High	High
FALSE	High	Master Protein	NP_610944.1	SET and MYND domain containing, arthropod-specific, member 1 [Drosophila melanogaster]	0.002	14.788	8	4	6	4	1	513	58.6	7.5	162	4	3.223	1.971	1.62	0.0770875	0.341319	0.612335	56	110.4	180.6	90.8	22.53	43.93	2.85	0.94	High	High	High	High	High	High	High	High
FALSE	High	Master Protein	NP_001245610.1	hyperkinetic, isoform F [Drosophila melanogaster]	0.002	12.237	9	5	7	5	1	698	77.9	8.41	111	5	3.22	3.544	2.613	0.0216142	0.0250936	0.0391428	43.5	154	139.9	113.6	21.99	6.66	3.41	4.28	High	High	High	High	High	High	High	High
FALSE	High	Master Protein	NP_731459.2	synapsin, isoform D [Drosophila melanogaster]	0	117.1	29	24	66	7	1	1041	109.4	7.94	1597	24	3.216	2.996	2.816	0.0225584	0.0356249	0.0469802	44.8	134.3	144.2	126.3	3.01	12.96	7.96	11.84	High	High	High	High	High	High	High	High
FALSE	High	Master Protein	NP_524407.1	neither inactivation nor afterpotential E [Drosophila melanogaster]	0	57.001	13	7	58	7	1	373	41.5	8.02	1859	7	3.215	1.097	0.634	0.0395376	1	0.422606	72.1	79.1	231.8	45.7	4.63	17.93	6.43	21.8	High	High	High	High	High	High	High	High
FALSE	High	Master Protein	NP_649875.1	insulator binding factor 1, isoform A [Drosophila melanogaster]	0.002	10.401	24	3	3	3	1	242	27.7	6.44	60	3	3.213	3.08	2.184	0.0546565	0.079082	0.185164	39.9	122.9	128.2	87.1	34.31	9.96	12.37	12.24	High	High	High	High	High	High	High	High
FALSE	High	Master Protein	NP_651062.3	james bond, isoform B [Drosophila melanogaster]	0.002	13.515	9	3	16	3	1	322	36.9	9.61	503	3	3.212	3.448	9.163	0.0894901	0.0975108	0.0369737	28.5	98.1	91.4	260.8	2.59	7.94	2.99	5.94	High	High	High	High	High	High	High	High
FALSE	Low	Master Protein	NP_723159.1	uncharacterized protein Dmel_CG31642 [Drosophila melanogaster]	0.06	2.208	2	1	1	1	1	557	61.7	5.39	28	1	3.211	2.785	5.021	0.0907657	0.154099	0.0617535	36.1	100.5	115.9	181.3	30.55	30.74	1.46	1.21	High	High	High	High	High	High	High	High
FALSE	High	Master Protein	NP_001036275.1	ether a go-go, isoform B [Drosophila melanogaster]	0.002	13.312	4	4	5	4	1	1270	135.9	8.1	151	4	3.208	2.9	2.479	0.0474189	0.0787645	0.119778	45.5	131.9	145.9	112.7	40.46	5.97	2.02	10.01	High	High	High	High	High	High	High	High
FALSE	High	Master Protein	NP_726597.1	gawky, isoform B [Drosophila melanogaster]	0	20.359	7	6	10	6	1	1384	142.9	6.74	193	6	3.208	3.411	2.5	0.0962867	0.106174	0.211565	43.7	149.2	140.3	109.4	8.5	1.14	15.15	0.85	High	High	High	High	High	High	High	High
FALSE	High	Master Protein	NP_611675.2	CG4752 [Drosophila melanogaster]	0	119.512	25	29	52	29	1	1294	139.5	6.47	1241	29	3.201	2.484	2.246	0.0218385	0.0443581	0.0649011	50.1	124.5	160.5	112.6	12.97	17.8	10.52	0.03	High	High	High	High	High	High	High	High
FALSE	High	Master Protein	NP_608350.2	uncharacterized protein Dmel_CG12531, isoform A [Drosophila melanogaster]	0	25.062	10	6	14	6	1	812	87.4	7.31	221	6	3.196	3.7	3.33	0.0359357	0.0368893	0.0527938	39.9	147.5	127.4	132.7	8.66	3.45	3.76	6.69	High	High	High	High	High	High	High	High
FALSE	High	Master Protein	NP_523791.2	coracle, isoform A [Drosophila melanogaster]	0	609.288	57	107	384	1	1	1698	184.1	8.7	8826	107	3.196	3.202	2.557	0.0277514	0.0371873	0.0652097	45.3	145	144.7	115.8	5.38	5.89	0.42	25.07	High	High	High	High	High	High	High	High
FALSE	High	Master Protein	NP_725115.1	ribosomal protein S11, isoform B [Drosophila melanogaster]	0	23.341	40	7	12	4	1	154	18.1	11.12	159	7	3.181	3.627	2.868	0.0395376	0.0408194	0.069472	43.4	157.3	138	124.4	0.16	36.9	0.74	10.12	High	High	High	High	High	High	High	High
FALSE	High	Master Protein	NP_608526.1	CG4133, isoform A [Drosophila melanogaster]	0	15.623	11	5	6	1	1	667	74.9	7.36	134	5	3.179	3.256	2.415	0.140397	0.162018	0.309829	46.1	150	146.5	111.3	50.09	4.71	9.18	30.75	High	High	High	High	High	High	High	High
FALSE	High	Master Protein	NP_731114.2	amalgam, isoform B [Drosophila melanogaster]	0	26.161	26	7	19	7	1	341	37.4	7.25	308	7	3.173	2.232	2.431	0.0167214	0.0356249	0.0326981	50.3	112.2	159.6	122.2	9.63	2.89	13.52	11.63	High	High	High	High	High	High	High	High
FALSE	High	Master Protein	NP_001096891.1	uncharacterized protein Dmel_CG15894, isoform B [Drosophila melanogaster]	0	117.771	28	34	54	34	1	1598	169.4	8.21	1135	34	3.171	2.892	3.479	0.0838008	0.12944	0.0927312	42	121.4	133.1	146.1	11.06	18.47	1.11	3.58	High	High	High	High	High	High	High	High
FALSE	High	Master Protein	NP_609882.1	uncharacterized protein Dmel_CG10178, isoform A [Drosophila melanogaster]	0	24.302	12	7	14	7	1	530	61.4	8.65	256	7	3.17	2.977	2.79	0.0218385	0.0355254	0.0391428	46.4	138.3	147.2	129.5	2.6	6.68	0.5	21.26	High	High	High	High	High	High	High	High
FALSE	High	Master Protein	NP_476609.1	Aspartyl-tRNA synthetase, isoform A [Drosophila melanogaster]	0	90.09	38	16	49	16	1	531	59	6.81	1426	16	3.16	1.537	1.853	0.0149001	0.0534602	0.0357967	58.7	90.2	185.6	108.8	2.4	12.78	1.96	3.14	High	High	High	High	High	High	High	High
FALSE	High	Master Protein	NP_001259254.1	uncharacterized protein Dmel_CG42492, isoform D [Drosophila melanogaster]	0	150.275	17	21	197	6	1	977	107.3	8.03	2682	21	3.158	2.742	2.317	0.124694	0.205023	0.305597	47	128.8	148.4	108.9	7.57	16.09	2.11	8.89	High	High	High	High	High	High	High	High
FALSE	High	Master Protein	NP_649926.2	nmdyn-D7 [Drosophila melanogaster]	0.002	9.778	13	4	4	4	1	387	44.2	7.05	74	4	3.153	2.793	3.312	0.0410423	0.0682316	0.0584443	43	120.2	135.6	142.5	11.1	28.78	20.19	0.67	High	High	High	High	High	High	High	High
FALSE	High	Master Protein	NP_652315.2	uncharacterized protein Dmel_CG30158 [Drosophila melanogaster]	0.006	6.345	10	2	2	2	1	280	30.2	9.25	78	2	3.152	1.86	1.681	0.139856	0.576791	0.731202	50.7	94.2	159.6	85.1	27.39	16.32	10.6	4.28	High	High	High	High	High	High	High	High
FALSE	High	Master Protein	NP_609689.3	uncharacterized protein Dmel_CG16885 [Drosophila melanogaster]	0	47.142	27	9	22	9	1	270	28.7	9.45	300	9	3.144	3.832	1.765	0.0870093	0.0769402	0.49256	47	180.1	147.7	82.9	0.57	29.03	1.99	22.24	High	High	High	High	High	High	High	High
FALSE	High	Master Protein	NP_001247287.1	extended synaptotagmin-like protein 2, isoform C [Drosophila melanogaster]	0	126.475	30	26	81	26	1	853	94.8	6.15	1214	26	3.14	2.803	1.989	0.0153992	0.0224811	0.0391428	50.2	140.8	157.7	99.9	5.65	4.82	1.34	15.8	High	High	High	High	High	High	High	High
FALSE	Medium	Master Protein	NP_572562.1	BCL7-like [Drosophila melanogaster]	0.044	2.518	7	1	2	1	1	154	16.6	9.5	59	1	3.138	3.594	1.543	0.111658	0.103647	0.798476	43.7	157	137.1	67.4	35.91	5.34	29.15	13	High	High	High	High	High	High	High	High
FALSE	High	Master Protein	NP_001162805.1	uncharacterized protein Dmel_CG17065, isoform B [Drosophila melanogaster]	0.003	8.245	8	2	3	2	1	431	47	6.77	37	2	3.137	3.193	2.867	0.108245	0.128957	0.164654	43.4	138.7	136.3	124.6	30.54	13.55	0.33	10.56	High	High	High	High	High	High	High	High
FALSE	High	Master Protein	NP_001246678.1	uncharacterized protein Dmel_CG43078, isoform H [Drosophila melanogaster]	0	298.538	30	63	155	21	1	2540	285.6	4.98	3530	63	3.137	2.746	2.141	0.0412584	0.0718928	0.144487	47.5	130.4	149	101.7	13.12	12.05	15.6	5.14	High	High	High	High	High	High	High	High
FALSE	High	Master Protein	NP_001097988.2	uncharacterized protein Dmel_CG18673 [Drosophila melanogaster]	0.006	5.391	4	2	3	2	1	302	34.3	5.97	48	2	3.131	5.118	2.554	0.0467103	0.0356249	0.102472	38.9	198.8	121.7	99.2	8.19	9.99	5.14	6.99	High	High	High	High	High	High	High	High
FALSE	High	Master Protein	NP_649166.1	schumacher-levy [Drosophila melanogaster]	0	16.799	10	5	8	5	1	601	66.2	8.47	176	5	3.131	7.54	11.754	0.0842311	0.0356249	0.0275693	20.4	153.8	63.9	239.8	23.17	1.3	35.72	21.75	High	High	High	High	High	High	High	High
FALSE	High	Master Protein	NP_650632.1	Pyrroline-5-carboxylate reductase-like 2, isoform A [Drosophila melanogaster]	0	36.095	34	6	27	6	1	273	28.1	8.7	989	6	3.13	2.156	2.393	0.0274845	0.0872198	0.0708672	52.3	112.8	163.7	125.1	2.54	17.64	12.96	21.09	High	High	High	High	High	High	High	High
FALSE	High	Master Protein	NP_609276.1	uncharacterized protein Dmel_CG13108 [Drosophila melanogaster]	0.002	9.432	11	3	4	3	1	233	26.9	4.94	95	3	3.127	2.888	2.076	0.107651	0.155729	0.353026	48.9	141.2	152.9	101.5	18.36	39.78	9.8	8.32	High	High	High	High	High	High	High	High
FALSE	Medium	Master Protein	NP_610938.1	vesicular GABA transporter [Drosophila melanogaster]	0.031	3.09	8	2	5	2	1	549	60.8	6.65	21	2	3.125	2.652	2.811	0.0354004	0.0644728	0.0642387	47.8	126.6	149.3	134.2	22.24	26.34	6.14	6.36	High	High	High	High	High	High	High	High
FALSE	High	Master Protein	NP_609690.1	uncharacterized protein Dmel_CG16884 [Drosophila melanogaster]	0	25.168	25	8	15	8	1	277	29.7	9.2	169	8	3.118	3.445	1.465	0.0174167	0.0224811	0.163318	49.4	170.3	154.2	72.4	3.51	2.88	8.63	16.18	High	High	High	High	High	High	High	High
FALSE	High	Master Protein	NP_610390.1	Cyp6a13 [Drosophila melanogaster]	0	20.57	9	4	14	4	1	493	57.6	8.46	245	4	3.113	1.489	2.394	0.0225584	0.308711	0.0600275	55.8	83.1	173.7	133.6	3.36	2.61	6.02	27.96	High	High	High	High	High	High	High	High
FALSE	High	Master Protein	NP_610875.1	centrosomin's beautiful sister, isoform A [Drosophila melanogaster]	0.002	12.577	8	4	4	4	1	611	70.8	5.3	104	4	3.112	4.361	6.417	0.0489641	0.0370832	0.0316759	31	135.1	96.4	198.8	22.18	14.06	6.43	30.24	High	High	High	High	High	High	High	High
FALSE	Medium	Master Protein	NP_001261935.1	uncharacterized protein Dmel_CG13048, isoform B [Drosophila melanogaster]	0.022	3.577	5	1	2	1	1	206	22.2	7.68	48	1	3.109	3.73	1.83	0.119962	0.102397	0.534014	45.2	168.7	140.7	82.8	4.22	28.7	30.06	2.91	High	High	High	High	High	High	High	High
FALSE	High	Master Protein	NP_650829.1	uncharacterized protein Dmel_CG11659 [Drosophila melanogaster]	0	17.63	9	5	5	5	1	546	61.2	5.82	172	5	3.108	1.487	1.838	0.0722268	0.733446	0.376505	58.4	86.8	181.5	107.3	33.31	5.39	2.25	9.71	High	High	High	High	High	High	High	High
FALSE	High	Master Protein	NP_001137754.1	prominin, isoform D [Drosophila melanogaster]	0	168.969	28	33	112	33	1	1235	138.2	8.03	3038	33	3.108	2.347	1.667	0.0224354	0.0521528	0.176038	54.1	126.9	168.1	90.2	1.42	20.63	14.82	13.72	High	High	High	High	High	High	High	High
FALSE	High	Master Protein	NP_609487.2	RALBP1 associated Eps domain containing, isoform A [Drosophila melanogaster]	0.002	10.291	5	4	4	4	1	907	96.4	5.76	66	4	3.108	2.877	2.554	0.063721	0.0972238	0.137882	46.8	134.5	145.3	119.4	7.16	0.33	20.59	10.4	High	High	High	High	High	High	High	High
FALSE	Low	Master Protein	NP_608761.2	uncharacterized protein Dmel_CG15406 [Drosophila melanogaster]	0.071	1.952	1	1	1	1	1	469	52.3	7.96	0	1	3.106	1.518	1.946	0.394465	1	0.88415	60.5	91.9	187.9	117.7	59.19	12.02	16.95	64.87	High	High	High	High	High	High	High	High
FALSE	High	Master Protein	NP_611415.2	CG9416, isoform A [Drosophila melanogaster]	0	29.07	12	9	17	9	1	861	98	6.37	469	9	3.106	2.463	1.974	0.0174331	0.0320644	0.0528703	52.1	128.2	161.7	102.8	9.97	9.49	1.53	7.32	High	High	High	High	High	High	High	High
FALSE	High	Master Protein	NP_524000.1	heat shock protein 27, isoform A [Drosophila melanogaster]	0	121.184	69	16	117	16	1	213	23.6	7.44	1869	16	3.103	3.07	3.091	0.04246	0.0544969	0.0628258	40.2	123.4	124.8	124.3	4.87	14.67	8.69	14.09	High	High	High	High	High	High	High	High
FALSE	High	Master Protein	NP_523503.2	neither inactivation nor afterpotential C, isoform B [Drosophila melanogaster]	0	281.057	38	64	205	19	1	1501	174.2	7.66	3549	64	3.103	2.185	1.579	0.0600172	0.184935	0.541665	53.4	116.7	165.7	84.3	4.57	17.73	16.68	18.48	High	High	High	High	High	High	High	High
FALSE	High	Master Protein	NP_726111.1	transport and golgi organization 11, isoform A [Drosophila melanogaster]	0	52.08	38	7	32	7	1	277	31.5	6.19	802	7	3.099	3.832	3.284	0.0346555	0.0356249	0.0494032	39.1	149.9	121.2	128.5	1.07	16.38	3.98	6.94	High	High	High	High	High	High	High	High
FALSE	Low	Master Protein	NP_651900.1	CG1971, isoform A [Drosophila melanogaster]	0.118	1.322	4	1	1	1	1	263	29.2	5.22	33	1	3.098	4.615	6.913				29.1	134.5	90.3	201.5		9.47	8.15	15.95	Not Found	High	High	High	High	High	High	High
FALSE	High	Master Protein	NP_001096916.1	retinal degeneration A, isoform B [Drosophila melanogaster]	0	104.695	20	19	63	19	1	1027	115.5	7.58	1866	19	3.098	2.389	1.647	0.0446618	0.107742	0.375341	52.2	124.7	161.8	86	1.69	13.5	15.07	8.58	High	High	High	High	High	High	High	High
FALSE	Medium	Master Protein	NP_648756.1	Pre-mRNA processing factor 31 [Drosophila melanogaster]	0.031	3.117	2	1	1	1	1	501	55.5	7.09	33	1	3.091	2.761	1.695	0.0951881	0.151915	0.576112	50.1	138.4	154.9	84.9	3.45	9.42	5.46	3.33	High	High	High	High	High	High	High	High
FALSE	High	Master Protein	NP_001036676.1	Chondrocyte-derived ezrin-like domain containing protein, isoform E [Drosophila melanogaster]	0	33.891	11	12	20	6	1	1167	132	8.43	340	12	3.086	2.254	2.875	0.0275163	0.076149	0.0513455	47.5	107.1	146.7	136.6	17.56	2.74	8.09	0.85	High	High	High	High	High	High	High	High
FALSE	High	Master Protein	NP_610937.4	uncharacterized protein Dmel_CG30069 [Drosophila melanogaster]	0	140.148	25	36	59	36	1	4012	460.7	8.35	984	36	3.077	3.49	2.408	0.0442392	0.044492	0.109569	44.2	154.3	136.1	106.5	12.12	3.97	13.97	22.86	High	High	High	High	High	High	High	High
FALSE	High	Master Protein	NP_001163746.1	scribbled, isoform L [Drosophila melanogaster]	0	155.994	20	39	82	11	1	2585	280.7	4.92	1738	39	3.077	3.494	2.065	0.0714601	0.0730526	0.257511	45.4	158.6	139.6	93.7	3.64	27.38	4.55	17.99	High	High	High	High	High	High	High	High
FALSE	Low	Master Protein	NP_476599.1	shuttle craft, isoform B [Drosophila melanogaster]	0.097	1.551	1	1	1	1	1	1106	123.1	8.32	29	1	3.073	2.784	3.714	0.189373	0.275636	0.159991	36.5	101.7	112.2	135.6	7.47	27.62	30.8	4.69	High	High	High	High	High	High	High	High
FALSE	High	Master Protein	NP_733465.1	Microtubule-associated protein 205, isoform B [Drosophila melanogaster]	0	112.606	25	28	59	28	1	1185	126.6	4.86	1095	28	3.072	3.082	2.565	0.0770875	0.0977619	0.15386	44.4	136.7	136.3	113.8	4.78	21.55	7.63	4.36	High	High	High	High	High	High	High	High
FALSE	High	Master Protein	NP_001247269.1	uncharacterized protein Dmel_CG34355, isoform E [Drosophila melanogaster]	0	87.985	31	19	47	19	1	755	84.6	6.33	1193	19	3.072	3.297	1.758	0.0262517	0.0356249	0.171527	49.5	163.1	152	87	6	3.15	1.32	23.84	High	High	High	High	High	High	High	High
FALSE	High	Master Protein	NP_524451.1	COP9 signalosome subunit 6 [Drosophila melanogaster]	0.002	11.529	12	4	4	4	1	341	38.3	5.82	67	4	3.069	1.862	2.783	0.160599	0.605199	0.235027	52.5	97.8	161.2	146.2	18.1	49.39	12.46	11.96	High	High	High	High	High	High	High	High
FALSE	High	Master Protein	NP_001137716.1	uncharacterized protein Dmel_CG10737, isoform O [Drosophila melanogaster]	0	173.815	34	28	98	1	1	944	102.4	8.22	3061	28	3.064	3.616	2.651	0.211979	0.182926	0.332653	42	151.8	128.6	111.3	42.73	5.98	12.87	38.26	High	High	High	High	High	High	High	High
FALSE	High	Master Protein	NP_649086.2	CG6812 [Drosophila melanogaster]	0	104.603	39	15	66	15	1	327	36.5	9.11	1262	15	3.058	2.172	2.73	0.0218385	0.042477	0.034933	50.8	110.4	155.4	138.8	2.55	9.53	7.79	14.14	High	High	High	High	High	High	High	High
FALSE	High	Master Protein	NP_001096985.2	uncharacterized protein Dmel_CG43737, isoform B [Drosophila melanogaster]	0	33.214	7	6	13	6	1	1605	169.3	4.75	347	6	3.054	2.602	2.363	0.0442165	0.0826402	0.112778	48.2	125.5	147.3	113.9	25.22	0.61	9.69	0.61	High	High	High	High	High	High	High	High
FALSE	Medium	Master Protein	NP_001245927.1	milton, isoform D [Drosophila melanogaster]	0.016	4.258	2	2	2	2	1	1256	135.3	6.38	22	2	3.054	2.922	2.465	0.141387	0.187512	0.277116	43.2	126.3	132.1	106.6	17.55	5.24	24.71	22.1	High	High	High	High	High	High	High	High
FALSE	High	Master Protein	NP_477307.1	collapsin response mediator protein, isoform A [Drosophila melanogaster]	0	145.998	48	26	116	3	1	589	64.4	7.02	1579	26	3.05	2.327	1.998	0.0275405	0.0671226	0.112778	53.4	124.4	163	106.8	5.7	2.55	14.09	15.83	High	High	High	High	High	High	High	High
FALSE	High	Master Protein	NP_001097287.1	dystrobrevin, isoform F [Drosophila melanogaster]	0	20.6	9	8	10	8	1	816	90.4	6.43	158	8	3.048	2.548	2.687	0.0218385	0.0407065	0.0460499	47.2	120.2	143.8	126.7	8.92	14.51	2.19	2.6	High	High	High	High	High	High	High	High
FALSE	High	Master Protein	NP_523570.3	yellow-c, isoform A [Drosophila melanogaster]	0	42.7	29	10	27	9	1	438	49.2	5.36	758	10	3.047	3.119	1.895	0.0224354	0.0356249	0.10305	49	153	149.4	92.9	3.2	8.57	2.52	13.22	High	High	High	High	High	High	High	High
FALSE	High	Master Protein	NP_725886.2	hu li tai shao, isoform I [Drosophila melanogaster]	0	252.954	59	43	216	1	1	718	79.3	6.84	4491	43	3.045	3.051	2.465	0.108589	0.131714	0.217454	43.5	132.7	132.5	107.2	30.68	23.97	7.16	11.71	High	High	High	High	High	High	High	High
FALSE	Medium	Master Protein	NP_001262346.1	uncharacterized protein Dmel_CG43254, isoform B [Drosophila melanogaster]	0.044	2.597	6	1	1	1	1	132	15	8.31	36	1	3.043	3.295	18.6	0.260776	0.264563	0.0446966	18.9	62.3	57.6	351.8	8.78	0.82	16.58	19.44	High	High	High	High	High	High	High	High
FALSE	High	Master Protein	NP_001262254.1	uncharacterized protein Dmel_CG31522, isoform I [Drosophila melanogaster]	0	21.164	14	5	20	5	1	392	44.9	9.47	332	5	3.04	2.848	2.765	0.0275163	0.041369	0.0529387	46.4	132.2	141.1	128.3	1.24	12.55	8.67	14.26	High	High	High	High	High	High	High	High
FALSE	Low	Master Protein	NP_611684.3	CG4294, isoform B [Drosophila melanogaster]	0.166	1.057	1	1	1	1	1	1333	150.6	5.62	0	1	3.038	2.21	2.826	0.0218385	0.0534602	0.0405253	47.5	104.9	144.2	134.1	16.84	2.82	14.89	4.35	High	High	High	High	High	High	High	High
FALSE	High	Master Protein	NP_001015157.2	Glutamine:fructose-6-phosphate aminotransferase 1, isoform A [Drosophila melanogaster]	0.002	13.759	7	4	4	4	1	694	78	6.57	160	4	3.036	3.161	1.546	0.0281209	0.035941	0.310122	52.1	164.7	158.1	80.5	5.15	10.28	23.39	17.46	High	High	High	High	High	High	High	High
FALSE	High	Master Protein	NP_650070.1	ninaG, isoform A [Drosophila melanogaster]	0.006	5.608	3	2	4	2	1	597	65.2	9.25	66	2	3.033	2.426	2.787	0.0462628	0.1026	0.0801661	50.4	122.2	152.8	140.4	19.92	23.65	6	0.94	High	High	High	High	High	High	High	High
FALSE	High	Master Protein	NP_511140.1	casein kinase ialpha, isoform B [Drosophila melanogaster]	0.002	11.909	9	4	4	4	1	337	39.5	9.38	44	4	3.031	1.949	2.653	0.0497442	0.216395	0.0927247	53.9	105.1	163.4	143	5.15	19.38	11.01	25.44	High	High	High	High	High	High	High	High
FALSE	Medium	Master Protein	NP_610295.1	CG2137 [Drosophila melanogaster]	0.012	4.396	2	1	1	1	1	713	79.7	8.87	78	1	3.028	4.453	6.15	0.184726	0.107742	0.0752786	30.3	135.2	91.9	186.6	60.82	1.85	8.24	23.22	High	High	High	High	High	High	High	High
FALSE	High	Master Protein	NP_732328.1	uncharacterized protein Dmel_CG31235, isoform A [Drosophila melanogaster]	0.006	5.782	5	3	4	3	1	406	45.5	5.72	52	3	3.028	2.568	2.31	0.170135	0.291702	0.36661	51.9	133.3	157.1	119.9	6.74	16.11	15.41	14.4	High	High	High	High	High	High	High	High
FALSE	Medium	Master Protein	NP_649449.1	CG9780 [Drosophila melanogaster]	0.028	3.349	2	1	1	1	1	592	67.3	8.94	42	1	3.023	2.6	2.861	0.0260933	0.0457335	0.047482	46.1	119.8	139.2	131.8	3.76	17.88	11.97	20.8	High	High	High	High	High	High	High	High
FALSE	High	Master Protein	NP_001261364.1	zinc transporter 63C, isoform F [Drosophila melanogaster]	0	18.811	11	2	6	2	1	545	59.5	6.74	243	2	3.021	3.028	2.419	0.0503643	0.0666022	0.119975	47.4	143.6	143.3	114.8	12.15	9.85	5.68	25.16	High	High	High	High	High	High	High	High
FALSE	High	Master Protein	NP_511129.3	phosphorylase kinase gamma, isoform D [Drosophila melanogaster]	0.004	7.148	4	2	2	2	1	560	63.3	8.22	35	2	3.02	3.816	1.855	0.0467717	0.0407065	0.238734	43.4	165.6	131.1	80.5	28.92	19.77	15.26	6.11	High	High	High	High	High	High	High	High
FALSE	High	Master Protein	NP_647685.1	uncharacterized protein Dmel_CG11815 [Drosophila melanogaster]	0.006	5.47	5	2	2	2	1	283	32.6	7.14	41	2	3.017	4.128	7.463	0.289096	0.194556	0.0893427	30.7	126.8	92.7	229.3	30.69	12.09	18.96	23.2	High	High	High	High	High	High	High	High
FALSE	High	Master Protein	NP_610040.1	uncharacterized protein Dmel_CG17472 [Drosophila melanogaster]	0.002	13.648	20	3	7	3	1	159	18.9	9.16	134	3	3.012	3.688	12.013	0.074789	0.0652921	0.0238667	23.6	87.2	71.2	283.9	4.77	0.67	34.37	27.87	High	High	High	High	High	High	High	High
FALSE	High	Master Protein	NP_995707.2	nicotinic acetylcholine receptor alpha5, isoform D [Drosophila melanogaster]	0	21.718	6	4	6	3	1	808	91.2	7.28	228	4	3.008	1.946	2.128	0.0275163	0.111472	0.0883363	52.5	102.3	158	111.8	21.22	2.52	11.57	13.57	High	High	High	High	High	High	High	High
FALSE	High	Master Protein	NP_001259282.1	uncharacterized protein Dmel_CG34417, isoform T [Drosophila melanogaster]	0	312.44	18	89	156	89	1	5182	579.9	9.04	2877	89	3.006	4.579	2.425	0.0281209	0.0280995	0.0661633	40.3	184.7	121.2	97.8	2.98	19.93	10.54	7.67	High	High	High	High	High	High	High	High
FALSE	High	Master Protein	NP_001036766.2	calnexin 99A, isoform E [Drosophila melanogaster]	0	308.626	45	40	293	1	1	604	68.9	4.96	6141	40	3.002	1.541	2.917	0.114617	0.77893	0.152452	52.8	81.3	158.4	153.9	4.76	20.68	12.27	49.51	High	High	High	High	High	High	High	High
FALSE	High	Master Protein	NP_726886.1	Hsc/Hsp70-interacting protein related, isoform B [Drosophila melanogaster]	0	76.752	35	14	45	14	1	377	41	5.35	1687	14	3.001	2.734	3.962	0.0522627	0.0840788	0.0513013	41.7	114	125.1	165.2	2.89	4.27	7.81	0.17	High	High	High	High	High	High	High	High
FALSE	High	Master Protein	NP_651691.4	protein tyrosine phosphatase 99A, isoform F [Drosophila melanogaster]	0	20.826	5	6	12	6	1	1397	157.2	6.76	212	6	3	1.946	2.445	0.0799814	0.319947	0.170194	53.2	103.6	159.7	130.1	36.13	19.37	4.12	4.4	High	High	High	High	High	High	High	High
FALSE	High	Master Protein	NP_995893.1	par-1, isoform H [Drosophila melanogaster]	0	76.612	27	25	40	7	1	993	107.7	9.96	480	25	2.999	2.217	2.536	0.254165	0.544523	0.41181	49.4	109.6	148.3	125.4	2.29	0.49	13.58	12.99	High	High	High	High	High	High	High	High
FALSE	Medium	Master Protein	NP_001285496.1	Rho GTPase activating protein at 19D, isoform D [Drosophila melanogaster]	0.019	3.792	0	1	1	1	1	2206	232.2	8.91	62	1	2.995	2.898	3.091	0.108239	0.141713	0.131845	43.4	125.8	130	134.2	19.34	8.13	21.38	11.85	High	High	High	High	High	High	High	High
FALSE	High	Master Protein	NP_647874.1	cuticular protein 64Ac [Drosophila melanogaster]	0.006	5.925	7	1	2	1	1	188	19.1	8.27	57	1	2.993	3.967	1.19	0.186897	0.129638	1	48.4	192	144.9	57.6	5.11	45.24	11.25	23.44	High	High	High	High	High	High	High	High
FALSE	High	Master Protein	NP_730762.2	chromator, isoform B [Drosophila melanogaster]	0.002	14.415	6	5	5	5	1	926	101	7.17	129	5	2.985	2.897	1.756	0.417627	0.498837	0.978865	49.2	142.6	147	86.4	3.59	0.65	28.23	84.09	High	High	High	High	High	High	High	High
FALSE	High	Master Protein	NP_609032.1	mummy, isoform A [Drosophila melanogaster]	0	59.844	37	17	33	17	1	520	58.2	7.21	529	17	2.984	2.337	2.022	0.0488921	0.116111	0.182377	54.1	126.5	161.6	109.5	1.68	4.9	6.61	38.52	High	High	High	High	High	High	High	High
FALSE	High	Master Protein	NP_611995.1	ejaculatory bulb protein, isoform A [Drosophila melanogaster]	0	40.404	18	6	28	6	1	377	37.8	9.7	904	6	2.982	3.193	12.456	0.0519016	0.0578104	0.0202205	24.3	77.6	72.5	302.7	11.53	6.81	5.85	32.96	High	High	High	High	High	High	High	High
FALSE	High	Master Protein	NP_727371.1	CG9691, isoform B [Drosophila melanogaster]	0	52.774	58	10	34	10	1	121	12.9	5.96	472	10	2.978	2.645	2.888	0.170731	0.264563	0.217263	46.8	123.7	139.3	135.1	0.92	46.45	4.52	14.44	High	High	High	High	High	High	High	High
FALSE	High	Master Protein	NP_647768.3	chitinase 7 [Drosophila melanogaster]	0.002	14.495	5	4	8	4	1	1013	113.2	6.33	181	4	2.978	2.53	1.693	0.0218385	0.0365828	0.135129	53.6	135.6	159.6	90.7	12.04	0.8	5.62	18.55	High	High	High	High	High	High	High	High
FALSE	High	Master Protein	NP_727531.2	Cyp4g15, isoform C [Drosophila melanogaster]	0.002	11.706	10	4	5	3	1	574	65.3	8.75	102	4	2.977	2.851	2.204	0.0294567	0.0423811	0.0829191	49.3	140.7	146.9	108.8	19.81	0.36	11.41	21.86	High	High	High	High	High	High	High	High
FALSE	High	Master Protein	NP_001014758.2	dopamine 2-like receptor, isoform H [Drosophila melanogaster]	0.003	8.781	3	3	4	3	1	905	95	5.4	104	3	2.975	2.551	2.524	0.0458377	0.0867246	0.0927247	48.5	123.8	144.3	122.5	0.33	30.55	0.58	15.9	High	High	High	High	High	High	High	High
FALSE	Medium	Master Protein	NP_001245838.1	uncharacterized protein Dmel_CG43402, isoform A [Drosophila melanogaster]	0.021	3.653	10	2	4	2	1	164	19.1	5.16	76	2	2.975	1.106	5.063	0.204181	1	0.0988419	45.1	49.9	134.2	228.4	34.76	5.44	32.68	38.42	High	High	High	High	High	High	High	High
FALSE	High	Master Protein	NP_477464.1	synaptotagmin 4 [Drosophila melanogaster]	0.002	11.868	8	4	4	4	1	474	52.2	8.82	49	4	2.975	2.495	2.857	0.0327576	0.060756	0.0560723	48.7	121.4	144.8	139	22.25	13.64	4.41	8.52	High	High	High	High	High	High	High	High
FALSE	High	Master Protein	NP_609379.1	CG5381, isoform A [Drosophila melanogaster]	0	30.336	17	8	13	8	1	686	76.8	8.92	424	8	2.973	3.137	2.864	0.0342314	0.0398134	0.0571437	44.1	138.5	131.3	126.4	12.75	0.88	0.67	8.66	High	High	High	High	High	High	High	High
FALSE	High	Master Protein	NP_651924.2	asator, isoform D [Drosophila melanogaster]	0	32.428	10	10	15	10	1	1349	148.4	8.65	209	10	2.972	2.935	2.714	0.640946	0.720227	0.780207	46.4	136.3	138	126	2.36	40.98	2.46	45.76	High	High	High	High	High	High	High	High
FALSE	High	Master Protein	NP_725019.1	F-box and leucine-rich repeat protein 6, isoform B [Drosophila melanogaster]	0	21.045	15	7	8	7	1	720	77.6	7.42	210	7	2.957	3.273	1.742	0.317803	0.305349	0.90436	42.3	138.4	125	73.6	20.94	25.25	33.13	38.04	High	High	High	High	High	High	High	High
FALSE	High	Master Protein	NP_610833.1	uncharacterized protein Dmel_CG13324 [Drosophila melanogaster]	0.002	11.24	15	3	7	2	1	112	12.6	10.08	190	3	2.957	1.052	3.588	0.201492	1	0.16522	47.9	50.4	141.6	171.8	40.37	6.33	19.43	14.53	High	High	High	High	High	High	High	High
FALSE	High	Master Protein	NP_001261331.1	misshapen, isoform F [Drosophila melanogaster]	0	32.258	8	10	15	1	1	1404	152.5	9.14	159	10	2.956	2.792	2.578	0.292659	0.376351	0.436602	48.1	134.3	142.2	124	36.68	15.01	0.81	34.98	High	High	High	High	High	High	High	High
FALSE	High	Master Protein	NP_001284901.1	trapped in endoderm 1, isoform C [Drosophila melanogaster]	0.008	5.011	5	2	3	2	1	399	44.7	8.78	51	2	2.954	2.358	1.997	0.0297149	0.0652921	0.113537	53.5	126.1	158	106.8	7.41	18.34	13.05	14.23	High	High	High	High	High	High	High	High
FALSE	High	Master Protein	NP_001246228.1	bruchpilot, isoform J [Drosophila melanogaster]	0	733.692	51	165	571	1	1	2238	255.1	6.9	8401	165	2.952	2.692	2.507	0.0621005	0.0985989	0.125386	46.4	124.9	137	116.4	2.89	10.2	12.34	0.62	High	High	High	High	High	High	High	High
FALSE	High	Master Protein	NP_647806.2	striatin interacting protein, isoform B [Drosophila melanogaster]	0.002	9.526	3	3	3	3	1	927	104.6	5.85	67	3	2.95	2.197	3.324	0.34289	0.657773	0.315605	47.4	104.2	140	157.7	19.76	14.36	11.51	4.8	High	High	High	High	High	High	High	High
FALSE	High	Master Protein	NP_001259113.1	uncharacterized protein Dmel_CG11663, isoform B [Drosophila melanogaster]	0.002	15.301	27	4	5	4	1	152	16	11.49	150	4	2.948	3.855	5.546	0.136126	0.0966225	0.0632331	34.1	131.6	100.6	189.3	13.64	9.47	16.05	7.82	High	High	High	High	High	High	High	High
FALSE	Medium	Master Protein	NP_523496.1	neuroligin 2, isoform A [Drosophila melanogaster]	0.018	4.067	1	2	2	2	1	1248	136.8	7.49	41	2	2.946	2.772	2.506	0.0649713	0.096296	0.131636	48	133	141.4	120.3	24.84	0.93	8.45	21.27	High	High	High	High	High	High	High	High
FALSE	High	Master Protein	NP_651384.2	uncharacterized protein Dmel_CG10560 [Drosophila melanogaster]	0.005	6.448	6	2	3	2	1	414	48.1	6.15	67	2	2.945	1.123	0.936	0.0492444		1	69.4	77.9	204.4	64.9	12		4.39	15.31	High	High	High	High	High	High	High	High
FALSE	High	Master Protein	NP_649211.1	CG5618, isoform A [Drosophila melanogaster]	0.002	13.327	10	5	6	5	1	510	57.4	6.71	55	5	2.943	2.53	1.92	0.0218385	0.0365828	0.0819987	53.3	134.9	156.9	102.4	2.8	18.67	2.45	12.6	High	High	High	High	High	High	High	High
FALSE	Low	Master Protein	NP_001163353.1	seminal fluid protein 65A [Drosophila melanogaster]	0.061	2.202	6	1	1	1	1	141	15.5	7.12	27	1	2.939	4.158	10.466	0.415145	0.270215	0.0889953	25	103.8	73.4	261.3	19.04	70.63	4.46	45.2	High	High	High	High	High	High	High	High
FALSE	High	Master Protein	NP_001247272.1	uncharacterized protein Dmel_CG12268, isoform C [Drosophila melanogaster]	0	18.072	7	3	8	3	1	531	60.3	7.91	215	3	2.939	2.318	4.605	0.0786699	0.181197	0.0557983	42.2	97.8	124	194.2	16.74	27.78	7.97	26.02	High	High	High	High	High	High	High	High
FALSE	High	Master Protein	NP_001163784.1	coat protein (coatomer) gamma, isoform C [Drosophila melanogaster]	0	69.205	17	14	38	2	1	878	97.1	5.3	1010	14	2.936	2.855	2.177	0.0495956	0.0701833	0.145447	49.6	141.7	145.7	108	14.36	19.68	15.71	9.05	High	High	High	High	High	High	High	High
FALSE	High	Master Protein	NP_001014458.3	uncharacterized protein Dmel_CG33543 [Drosophila melanogaster]	0.002	10.144	7	3	5	3	1	468	52.5	8.53	118	3	2.935	2.172	1.954	0.0447004	0.128957	0.182332	55.2	120	162.2	108	29.69	18.83	5.44	14.04	High	High	High	High	High	High	High	High
FALSE	High	Master Protein	NP_001262916.1	nicotinic acetylcholine receptor alpha1, isoform B [Drosophila melanogaster]	0.005	6.23	3	2	3	1	1	597	67.3	5.33	79	2	2.934	2.139	2.202	0.125688	0.331256	0.305597	51.8	110.9	152.1	114.2	36.7	34.11	22.58	10.12	High	High	High	High	High	High	High	High
FALSE	High	Master Protein	NP_524600.3	calcineurin A1, isoform A [Drosophila melanogaster]	0	35.124	13	9	24	4	1	622	69.1	7.75	471	9	2.933	3.132	1.889	0.120966	0.128957	0.448362	48	150.3	140.8	90.7	11.79	23.07	19.32	27.37	High	High	High	High	High	High	High	High
FALSE	High	Master Protein	NP_731506.1	uncharacterized protein Dmel_CG45078 [Drosophila melanogaster]	0	18.157	37	6	13	5	1	163	18.8	10.36	251	6	2.932	2.061	1.39	0.0997276	0.306543	0.92419	58.8	121.2	172.4	81.8	17.6	24.67	13.56	12.47	High	High	High	High	High	High	High	High
FALSE	High	Master Protein	NP_001260237.1	CG8086, isoform I [Drosophila melanogaster]	0	19.401	7	5	8	5	1	1603	175.2	8.75	137	5	2.928	4.032	1.975	0.0216142	0.0224811	0.0600275	44.5	179.3	130.2	87.8	15.57	1.44	13.85	9.51	High	High	High	High	High	High	High	High
FALSE	High	Master Protein	NP_730954.2	collapsin response mediator protein, isoform E [Drosophila melanogaster]	0	136.9	45	24	108	1	1	594	65.1	6.7	1385	24	2.925	2.519	2.173	0.03825	0.069877	0.110976	52.2	131.5	152.7	113.5	1.89	34.04	3.27	4.54	High	High	High	High	High	High	High	High
FALSE	High	Master Protein	NP_651754.1	CG7896 [Drosophila melanogaster]	0	18.586	5	7	9	7	1	1392	154	6.74	102	7	2.923	2.107	2.043	0.0621005	0.1906	0.210203	54.9	115.7	160.5	112.2	28.68	23.99	5.44	20.08	High	High	High	High	High	High	High	High
FALSE	High	Master Protein	NP_001097031.2	CG8028, isoform C [Drosophila melanogaster]	0	28.916	9	7	16	7	1	563	62.4	9.33	258	7	2.918	2.774	3.833	0.0218385	0.0356249	0.0238667	42.6	118.1	124.3	163.3	3.2	14.04	9.84	5.74	High	High	High	High	High	High	High	High
FALSE	High	Master Protein	NP_001027183.1	uncharacterized protein Dmel_CG10096, isoform B [Drosophila melanogaster]	0	37.296	15	8	29	8	1	502	57.2	8.66	342	8	2.916	2.97	10.383	0.0354971	0.0443118	0.0186798	27.5	81.8	80.3	286	11.03	16.82	4.9	21.29	High	High	High	High	High	High	High	High
FALSE	High	Master Protein	NP_610359.2	lipin, isoform A [Drosophila melanogaster]	0	31.313	7	9	16	9	1	1089	120.8	4.86	338	9	2.914	3.163	2.159	0.248888	0.249927	0.535903	47.4	149.9	138.1	102.3	10.18	51.78	0.43	45.61	High	High	High	High	High	High	High	High
FALSE	High	Master Protein	NP_611238.2	NADH dehydrogenase (ubiquinone) 51 kDa subunit-like 1 [Drosophila melanogaster]	0.002	14.725	7	4	8	3	1	702	76.8	8.97	138	4	2.913	3.819	6.881	0.0410654	0.0356249	0.0238667	31.8	121.3	92.5	218.6	26.38	2.43	14.61	20.09	High	High	High	High	High	High	High	High
FALSE	High	Master Protein	NP_001245427.1	unc-13, isoform E [Drosophila melanogaster]	0	50.394	5	14	17	14	1	3186	360.2	6.38	248	14	2.912	2.299	3.137	0.0577687	0.133261	0.0704756	46.6	107.1	135.7	146.2	16.99	18.79	15.77	10.92	High	High	High	High	High	High	High	High
FALSE	High	Master Protein	NP_001286327.1	metallophosphoesterase, isoform E [Drosophila melanogaster]	0.002	13.67	16	4	6	4	1	366	43	9.14	79	4	2.912	1.337	3.329	0.12258	1	0.119975	52.2	69.8	151.9	173.6	24.75	2.03	14.49	1.03	High	High	High	High	High	High	High	High
FALSE	Medium	Master Protein	NP_647644.2	RabX5 [Drosophila melanogaster]	0.019	3.792	5	1	2	1	1	277	31.5	9.38	44	1	2.91	2.539	1.796	0.017315	0.0280995	0.0592699	54.2	137.5	157.6	97.3	10.96	9.05	8.41	10.14	High	High	High	High	High	High	High	High
FALSE	High	Master Protein	NP_651357.1	uncharacterized protein Dmel_CG11852 [Drosophila melanogaster]	0.004	8.033	16	4	4	4	1	250	28	8.32	43	4	2.908	1.683	1.716	0.0360655	0.249927	0.227449	59.5	100.2	173.1	102.1	14.5	14.46	13.95	23.31	High	High	High	High	High	High	High	High
FALSE	High	Master Protein	NP_001287562.1	Cyp6a18, isoform B [Drosophila melanogaster]	0	29.155	16	8	12	7	1	507	57.9	9.11	250	8	2.907	3.046	3.389	0.0225584	0.0356249	0.0316759	44.8	136.6	130.3	152	0.1	20.64	2.43	14.13	High	High	High	High	High	High	High	High
FALSE	High	Master Protein	NP_001033801.3	uncharacterized protein Dmel_CG33978, isoform E [Drosophila melanogaster]	0	16.776	3	6	11	6	1	2289	256.4	6.6	164	6	2.905	2.567	1.741	0.0174167	0.0280995	0.0657885	54.8	140.7	159.3	95.5	6.41	7.77	14.15	1.78	High	High	High	High	High	High	High	High
FALSE	High	Master Protein	NP_610575.1	Nidogen/entactin, isoform A [Drosophila melanogaster]	0	19.504	5	5	6	5	1	1350	149	4.59	123	5	2.901	1.403	1.331	0.0218385	0.273264	0.38286	64.1	90	186.1	85.4	7.55	5.94	16.45	3.75	High	High	High	High	High	High	High	High
FALSE	High	Master Protein	NP_649535.2	CG2663, isoform C [Drosophila melanogaster]	0.005	6.389	7	2	4	2	1	308	35.5	6.55	48	2	2.897	5.935	4.255	0.530191	0.219719	0.339677	33.9	201.4	98.3	144.4	19.36	15.45	3.9	25.93	High	High	High	High	High	High	High	High
FALSE	High	Master Protein	NP_001097435.2	uncharacterized protein Dmel_CG43795 [Drosophila melanogaster]	0	17.043	4	4	15	4	1	1420	156.6	5.45	310	4	2.895	2.047	2.248	0.0153933	0.0299229	0.0238917	53.4	109.4	154.6	120.1	4.61	12.62	1.06	4.44	High	High	High	High	High	High	High	High
FALSE	High	Master Protein	NP_001246873.1	mushroom-body expressed, isoform F [Drosophila melanogaster]	0.002	14.586	9	5	8	5	1	557	56.2	8.56	144	5	2.892	2.379	2.023	0.0225584	0.0443581	0.0788989	52.2	124.1	150.9	105.6	6.73	23.04	0.92	4.57	High	High	High	High	High	High	High	High
FALSE	High	Master Protein	NP_524608.1	coat protein (coatomer) gamma, isoform A [Drosophila melanogaster]	0	61.188	17	14	32	2	1	879	97.2	5.3	870	14	2.888	3.592	2.385	0.0633396	0.0525678	0.139445	44.5	159.9	128.5	106.1	4.61	26.41	13.14	18.12	High	High	High	High	High	High	High	High
FALSE	High	Master Protein	NP_524651.2	chromosome bows, isoform A [Drosophila melanogaster]	0	32.836	8	11	16	11	1	1491	165.5	8.91	333	11	2.887	2.722	2.432	0.0294567	0.0439874	0.0644306	48.3	131.5	139.5	117.5	5.11	3.01	12.82	16.01	High	High	High	High	High	High	High	High
FALSE	High	Master Protein	NP_724106.1	fasciclin 3, isoform B [Drosophila melanogaster]	0	69.163	23	10	73	2	1	401	44.2	5.96	1635	10	2.886	2.233	1.73	0.0720764	0.179892	0.404707	55.7	124.3	160.7	96.3	3.84	10.25	1.7	6.73	High	High	High	High	High	High	High	High
FALSE	High	Master Protein	NP_730536.1	uncharacterized protein Dmel_CG11796, isoform A [Drosophila melanogaster]	0	51.48	30	11	21	11	1	380	43.3	5.68	429	11	2.885	1.258	1.55	0.0345227	0.85879	0.327821	64.1	80.7	185	99.4	6.23	13.94	1.13	18.48	High	High	High	High	High	High	High	High
FALSE	High	Master Protein	NP_477400.1	TAR DNA-binding protein-43 homolog, isoform B [Drosophila melanogaster]	0.008	5.273	2	1	2	1	1	531	58	7.14	34	1	2.885	1.727	4.312	0.419996	0.987292	0.248952	43.2	74.5	124.5	186.2	66.52	44.7	26.74	37.4	High	High	High	High	High	High	High	High
FALSE	High	Master Protein	NP_650672.1	deoxyribonuclease II [Drosophila melanogaster]	0	35.268	23	9	26	9	1	366	41.3	6.52	498	9	2.879	1.652	1.861	0.0442392	0.322219	0.203795	59.5	98.2	171.2	110.7	11.33	14.47	8.72	30.58	High	High	High	High	High	High	High	High
FALSE	High	Master Protein	NP_001247221.1	malvolio, isoform G [Drosophila melanogaster]	0.002	9.53	4	2	4	1	1	607	66.8	7.12	121	2	2.879	2.774	2.82	0.377924	0.459276	0.442092	42.8	118.7	123.2	120.6	27.08	17.64	26.31	3.76	High	High	High	High	High	High	High	High
FALSE	High	Master Protein	NP_001104344.2	uncharacterized protein Dmel_CG40498, isoform G [Drosophila melanogaster]	0	28.198	20	5	13	5	1	268	29.8	8.47	274	5	2.879	2.789	2.839	0.0218385	0.0354836	0.034933	46.7	130.1	134.4	132.5	11.28	6.95	0.92	0.02	High	High	High	High	High	High	High	High
FALSE	High	Master Protein	NP_477138.1	vesicular acetylcholine transporter [Drosophila melanogaster]	0	26.868	10	5	18	5	1	578	64.3	5.16	464	5	2.878	2.517	2.191	0.0149001	0.0224811	0.0238322	52.2	131.5	150.3	114.4	5.1	3.59	8.41	4.55	High	High	High	High	High	High	High	High
FALSE	High	Master Protein	NP_651562.2	uncharacterized protein Dmel_CG13978 [Drosophila melanogaster]	0.002	12.175	4	4	5	4	1	898	103.5	9.39	122	4	2.872	2.169	4.323	0.0536026	0.145095	0.0450139	43.2	93.6	124	186.6	0.18	8.6	5.57	7.49	High	High	High	High	High	High	High	High
FALSE	High	Master Protein	NP_001259446.1	discs large 1, isoform R [Drosophila melanogaster]	0	200.042	36	36	121	1	1	1001	106.8	8.59	2950	36	2.868	2.126	2.975	0.176702	0.421966	0.196456	49.4	105	141.6	146.9	23.41	11.42	7.36	0.19	High	High	High	High	High	High	High	High
FALSE	Medium	Master Protein	NP_001284887.1	small conductance calcium-activated potassium channel, isoform S [Drosophila melanogaster]	0.016	4.312	1	2	2	2	1	1174	128.1	9.26	43	2	2.864	2.165	2.16	0.0621005	0.166872	0.171683	52.1	112.9	149.3	112.6	5.46	3.36	9.31	9.6	High	High	High	High	High	High	High	High
FALSE	High	Master Protein	NP_001261051.1	patronin, isoform I [Drosophila melanogaster]	0	17.449	3	6	7	6	1	1689	189.8	8.51	84	6	2.864	2.94	2.034	0.0435345	0.0525678	0.146488	49.8	146.3	142.5	101.2	6.03	14.78	3.73	12.08	High	High	High	High	High	High	High	High
FALSE	High	Master Protein	NP_001262361.1	CG2698, isoform H [Drosophila melanogaster]	0.002	15.327	5	4	8	2	1	865	97.2	6.42	195	4	2.86	1.843	1.969	0.0284255	0.128957	0.107115	58	106.9	165.8	114.2	7.24	25.56	3.22	14.74	High	High	High	High	High	High	High	High
FALSE	High	Master Protein	NP_001188695.1	Muscle-specific protein 300 kDa, isoform G [Drosophila melanogaster]	0	315.859	8	83	127	12	1	13540	1506.8	4.63	2885	83	2.858	3.035	2.681	0.0583122	0.0664937	0.091633	46	139.5	131.4	123.2	1.45	3.63	3.1	3.8	High	High	High	High	High	High	High	High
FALSE	High	Master Protein	NP_651960.2	trio, isoform A [Drosophila melanogaster]	0	33.865	6	10	11	10	1	2263	256.8	6.58	227	10	2.857	2.553	2.96	0.0818447	0.135188	0.101695	46.5	118.9	133	137.8	3.73	6.89	2.47	1.18	High	High	High	High	High	High	High	High
FALSE	Medium	Master Protein	NP_650264.1	CG8483 [Drosophila melanogaster]	0.036	2.892	2	1	2	1	1	392	43.5	8.44	48	1	2.853	3.77	1.369	0.510914	0.377097	1	47.3	178.2	134.8	64.7	16.26	25.99	11.44	69.46	High	High	High	High	High	High	High	High
FALSE	High	Master Protein	NP_609415.1	uncharacterized protein Dmel_CG13144 [Drosophila melanogaster]	0.002	10.367	19	3	6	3	1	291	33.1	8.97	60	3	2.852	3.075	3.361	0.0711988	0.0791012	0.0713982	43.7	134.3	124.6	146.8	23.47	9.07	1.74	3.43	High	High	High	High	High	High	High	High
FALSE	High	Master Protein	NP_476602.1	gliotactin, isoform A [Drosophila melanogaster]	0	48.875	19	19	33	19	1	956	109.2	8.63	374	19	2.85	3.478	2.052	0.0422789	0.037808	0.140068	45.9	159.6	130.8	94.2	3.83	13.7	6.27	18	High	High	High	High	High	High	High	High
FALSE	High	Master Protein	NP_524647.2	still life, isoform A [Drosophila melanogaster]	0	166.133	21	41	100	13	1	2052	228.8	8.78	2199	41	2.846	2.37	2.556	0.148834	0.277483	0.229612	48.1	113.9	136.8	122.9	0.65	8.05	14.69	9.44	High	High	High	High	High	High	High	High
FALSE	High	Master Protein	NP_725511.2	Stretchin-Mlck, isoform R [Drosophila melanogaster]	0	359.77	40	83	229	66	1	1918	214.9	5.82	4387	83	2.842	3.835	1.928	0.0779777	0.0537994	0.290736	47.1	180.7	133.9	90.9	36.51	22.24	2.41	15.02	High	High	High	High	High	High	High	High
FALSE	High	Master Protein	NP_609065.1	uncharacterized protein Dmel_CG11327 [Drosophila melanogaster]	0.003	8.324	5	3	3	3	1	475	53.6	4.25	37	3	2.835	4.207	7.791	0.111035	0.0630313	0.0391428	29.9	125.7	84.7	232.9	41.03	16.67	21.92	0.59	High	High	High	High	High	High	High	High
FALSE	High	Master Protein	NP_524339.1	heat shock protein cognate 2 [Drosophila melanogaster]	0	95.003	26	16	74	10	1	633	69.7	7.18	2073	16	2.835	2.932	5.737	0.190251	0.208849	0.0732086	34.6	101.5	98.1	198.6	5.77	11.57	8.19	0.36	High	High	High	High	High	High	High	High
FALSE	High	Master Protein	NP_610693.1	trehalose transporter 1-1, isoform A [Drosophila melanogaster]	0	102.892	23	23	92	15	1	857	95.1	8.31	1111	23	2.834	2.032	1.943	0.0553088	0.178431	0.207905	53.7	109.1	152.1	104.3	14.76	1.67	1.18	21.1	High	High	High	High	High	High	High	High
FALSE	High	Master Protein	NP_722838.1	synaptotagmin 1, isoform B [Drosophila melanogaster]	0	134.751	42	24	134	1	1	472	53	5.88	2123	24	2.833	2.705	2.032	0.0814844	0.11529	0.254206	49.9	134.9	141.3	101.3	25.57	29.21	23.31	14.33	High	High	High	High	High	High	High	High
FALSE	High	Master Protein	NP_001097440.1	Unc-89, isoform C [Drosophila melanogaster]	0	226.359	16	63	108	63	1	4218	475.4	5.85	1781	63	2.833	2.851	1.955	0.0433975	0.0537388	0.161816	51.5	146.7	145.8	100.6	19.49	22.44	9.02	14.26	High	High	High	High	High	High	High	High
FALSE	High	Master Protein	NP_650792.1	uncharacterized protein Dmel_CG11703 [Drosophila melanogaster]	0.003	8.775	12	3	3	3	1	353	40.1	5.05	71	3	2.828	1.947	4.039	0.383432	0.812839	0.23619	44.7	87	126.4	180.4	48.84	56.4	9.27	2.46	High	High	High	High	High	High	High	High
FALSE	High	Master Protein	NP_001262857.1	carrier of wingless, isoform E [Drosophila melanogaster]	0	19.538	7	7	9	7	1	632	71.7	5.36	65	7	2.826	2.615	2.158	0.0340513	0.0505441	0.0893427	51.4	134.4	145.3	110.9	2.4	28.53	4.56	12.38	High	High	High	High	High	High	High	High
FALSE	High	Master Protein	NP_477473.1	regulatory particle triple-A ATPase 1 [Drosophila melanogaster]	0	102.894	49	22	60	22	1	433	48.5	6.04	1382	22	2.824	2.412	1.969	0.0275163	0.0507664	0.0986135	53.2	128.2	150.1	104.7	5.12	16.05	1.56	8.33	High	High	High	High	High	High	High	High
FALSE	High	Master Protein	NP_001162642.1	coat protein (coatomer) delta, isoform B [Drosophila melanogaster]	0	69.826	44	16	28	1	1	531	57.8	6.2	831	16	2.822	3.023	4.002	0.297227	0.301083	0.182377	41.1	124.1	115.8	164.3	12.5	32.52	3.53	23.72	High	High	High	High	High	High	High	High
FALSE	High	Master Protein	NP_649038.1	CG4306 [Drosophila melanogaster]	0	15.482	18	4	7	4	1	220	24.3	6.68	185	4	2.821	1.711	2.377	0.0596663	0.34699	0.124593	56	95.8	157.9	133.1	13.51	3.47	3.68	24.7	High	High	High	High	High	High	High	High
FALSE	High	Master Protein	NP_001259986.1	fatty acid synthase 2, isoform B [Drosophila melanogaster]	0	166.691	18	41	94	40	1	2410	265.8	7.09	2149	41	2.819	1.673	1.177	0.0336587	0.217216	1	65.9	110.3	185.9	77.6	4.25	16.57	5.83	26.32	High	High	High	High	High	High	High	High
FALSE	High	Master Protein	NP_001163753.1	beta-Tubulin at 97EF, isoform B [Drosophila melanogaster]	0	132.64	40	16	177	7	1	457	51.2	4.86	3676	16	2.819	1.914	1.54	0.0192319	0.0433292	0.11512	60.9	116.5	171.6	93.8	6.23	16.5	1.96	9.48	High	High	High	High	High	High	High	High
FALSE	High	Master Protein	NP_524063.1	heat shock protein cognate 1, isoform A [Drosophila melanogaster]	0	143.833	48	28	149	17	1	641	70.6	5.49	2808	28	2.818	2.124	2.358	0.0296787	0.0795836	0.0656454	53	112.5	149.3	124.9	0.49	19.42	9.6	13.14	High	High	High	High	High	High	High	High
FALSE	High	Master Protein	NP_648944.1	CG6664, isoform A [Drosophila melanogaster]	0	16.649	10	6	7	6	1	532	57.8	6.67	142	6	2.812	2.503	2.29	0.0204145	0.0312322	0.0384419	49.6	124.1	139.5	113.6	9.43	4.84	2.15	14.34	High	High	High	High	High	High	High	High
FALSE	High	Master Protein	NP_001027236.1	uncharacterized protein Dmel_CG17768, isoform A [Drosophila melanogaster]	0.006	5.805	17	2	3	2	1	154	16.9	10.05	71	2	2.811	2.503	2.165	0.259844	0.385217	0.522328	44.4	111.2	124.9	96.2	9.29	24.43	1.85	3.05	High	High	High	High	High	High	High	High
FALSE	Low	Master Protein	NP_476597.2	Son of sevenless [Drosophila melanogaster]	0.093	1.612	1	1	1	1	1	1596	177.8	7.4	18	1	2.806	2.405	3.129	0.482905	0.681072	0.450649	47.6	114.6	133.6	149	62.14	25.74	26.87	15.69	High	High	High	High	High	High	High	High
FALSE	Medium	Master Protein	NP_730894.2	CG1116, isoform D [Drosophila melanogaster]	0.038	2.813	2	1	1	1	1	443	49.6	8.38	41	1	2.804	2.605	1.86	0.345758	0.452931	0.816716	53.5	139.4	150	99.5	16.3	12.38	35.93	42.93	High	High	High	High	High	High	High	High
FALSE	High	Master Protein	NP_001259082.1	Calcium/calmodulin-dependent protein kinase II, isoform K [Drosophila melanogaster]	0	57.748	29	12	32	1	1	482	54.6	7.21	690	12	2.797	1.544	3.505	0.601442	1	0.495428	51.8	80.1	145	181.7	29.9	82.5	43.4	46.91	High	High	High	High	High	High	High	High
FALSE	High	Master Protein	NP_001263088.1	uncharacterized protein Dmel_CG15515 [Drosophila melanogaster]	0.005	6.664	8	1	2	1	1	123	13.5	5.5	62	1	2.795	1.722	1.326	0.515186	1	1	58	100	162.2	77	35.25	6.7	49.08	48.84	High	High	High	High	High	High	High	High
FALSE	High	Master Protein	NP_476714.1	shaggy, isoform A [Drosophila melanogaster]	0	38.461	12	7	19	1	1	575	58.7	8.09	522	7	2.79	2.032	2.125	0.0627352	0.195443	0.171909	55.3	112.3	154.2	117.4	6.42	29.24	13.05	19.14	High	High	High	High	High	High	High	High
FALSE	High	Master Protein	NP_524612.2	fat facets, isoform A [Drosophila melanogaster]	0	30.453	4	8	13	8	1	2778	310.9	6.05	335	8	2.789	1.985	1.788	0.160659	0.446249	0.585625	57.4	114	160.1	102.6	13.89	51.23	15.31	20.85	High	High	High	High	High	High	High	High
FALSE	High	Master Protein	NP_651240.1	CG6356 [Drosophila melanogaster]	0	45.335	13	8	21	8	1	570	62.9	8	487	8	2.788	1.807	1.656	0.0218385	0.0797452	0.122225	61	110.2	170.1	101.1	0.3	21.18	11.19	1.08	High	High	High	High	High	High	High	High
FALSE	Medium	Master Protein	NP_001138105.1	CG6364, isoform B [Drosophila melanogaster]	0.019	3.792	4	1	1	1	1	305	34.4	6.25	49	1	2.786	3.465	2.764	0.0446618	0.0388535	0.0662577	44.2	153	123	122	10.73	12.23	20.65	13	High	High	High	High	High	High	High	High
FALSE	High	Master Protein	NP_649948.1	CG8500, isoform A [Drosophila melanogaster]	0	23.696	15	4	10	4	1	233	25.8	8.84	211	4	2.781	2.301	1.395	0.174485	0.322863	1	58.7	135	163.1	81.8	0.15	17.56	5.56	56.58	High	High	High	High	High	High	High	High
FALSE	Low	Master Protein	NP_730427.1	listerin E3 ubiquitin protein ligase 1 [Drosophila melanogaster]	0.11	1.407	0	1	1	1	1	1747	198.5	5.94	22	1	2.78	2.421	1.761	0.111696	0.191443	0.474995	54.6	132.2	151.8	96.1	33.97	1.44	28.16	27.43	High	High	High	High	High	High	High	High
FALSE	High	Master Protein	NP_001036319.2	stoned B, isoform E [Drosophila melanogaster]	0	44.663	11	10	17	10	1	1262	137.7	4.73	505	10	2.777	1.834	2.601	0.0989801	0.389571	0.147831	54.2	99.5	150.6	141	11.66	4.93	4.4	8.03	High	High	High	High	High	High	High	High
FALSE	High	Master Protein	NP_523357.2	stromal interaction molecule, isoform A [Drosophila melanogaster]	0	111.88	30	20	80	1	1	570	64.8	6.43	1814	20	2.776	2.793	2.299	0.0565079	0.0733271	0.125403	48.5	135.6	134.7	111.6	25.67	6.14	15.53	20.53	High	High	High	High	High	High	High	High
FALSE	High	Master Protein	NP_727629.2	tomosyn, isoform C [Drosophila melanogaster]	0	61.008	12	17	29	17	1	1470	158.4	7.05	429	17	2.774	2.038	2.01	0.0218385	0.050211	0.0612619	56.2	114.6	156	113	9.45	6.22	6.05	11.35	High	High	High	High	High	High	High	High
FALSE	High	Master Protein	NP_649573.2	Autophagy-related 17, isoform C [Drosophila melanogaster]	0.003	8.154	4	3	7	3	1	1357	152.2	5.14	82	3	2.774	1.529	2.537	0.161091	0.848926	0.23579	52.5	80.3	145.7	133.3	31.35	48.55	3.69	11.75	High	High	High	High	High	High	High	High
FALSE	Low	Master Protein	NP_610856.1	CG4712, isoform B [Drosophila melanogaster]	0.081	1.803	2	1	3	1	1	674	78.1	6.15	0	1	2.771	0.875	27.938	0.157665	1	0.0233811	14.8	12.9	40.9	412.7	42.71	15.61	37.03	5.46	High	High	High	High	High	High	High	High
FALSE	High	Master Protein	NP_001188694.1	Muscle-specific protein 300 kDa, isoform D [Drosophila melanogaster]	0	620.737	17	176	254	105	1	12345	1404.3	5.21	4843	176	2.764	2.125	2.271	0.0218385	0.0417466	0.0452537	53.4	113.4	147.5	121.2	2.27	15.52	2.99	13.94	High	High	High	High	High	High	High	High
FALSE	Medium	Master Protein	NP_001097474.1	uncharacterized protein Dmel_CG12004, isoform C [Drosophila melanogaster]	0.022	3.644	2	1	1	1	1	486	53.4	7.3	48	1	2.757	2.067	2.27	0.301488	0.620176	0.511182	50.5	104.4	139.3	114.7	51.8	5.45	11.49	2.58	High	High	High	High	High	High	High	High
FALSE	Low	Master Protein	NP_001096867.3	Raf oncogene, isoform E [Drosophila melanogaster]	0.057	2.256	1	1	1	1	1	739	83.7	8.73	31	1	2.754	2.555	1.862	0.169515	0.242182	0.530848	52.7	134.5	145.1	98.1	12.55	9.67	29.88	26.26	High	High	High	High	High	High	High	High
FALSE	High	Master Protein	NP_722590.2	chitin deacetylase-like 5, isoform B [Drosophila melanogaster]	0	29.853	7	9	12	9	1	1998	221.3	8.78	303	9	2.754	5.067	2.148	0.132073	0.0525678	0.300724	41.6	210.5	114.4	89.2	19	17.22	5.45	34.4	High	High	High	High	High	High	High	High
FALSE	High	Master Protein	NP_650015.3	uncharacterized protein Dmel_CG45076, isoform A [Drosophila melanogaster]	0	128.72	51	33	84	23	1	619	68.6	5.06	1512	33	2.754	3.912	1.206	0.0706613	0.0452485	1	48.4	189.2	133.2	58.3	1.18	30.38	7.59	1.09	High	High	High	High	High	High	High	High
FALSE	High	Master Protein	NP_524423.2	Na/Ca-exchange protein, isoform A [Drosophila melanogaster]	0	96.644	25	21	69	1	1	950	106.1	4.92	1474	21	2.75	1.617	1.632	0.0149001	0.0373747	0.0459851	62.3	100.7	171.3	101.7	6.61	1.91	7.83	2.77	High	High	High	High	High	High	High	High
FALSE	High	Master Protein	NP_001162767.1	shibire, isoform L [Drosophila melanogaster]	0	182.764	47	40	120	4	1	883	98.4	8.24	2397	40	2.743	1.957	1.882	0.0301643	0.0982798	0.121277	58.7	115	161.2	110.6	6.45	13.61	1.25	11.02	High	High	High	High	High	High	High	High
FALSE	High	Master Protein	NP_001036692.1	pasilla, isoform F [Drosophila melanogaster]	0	60.686	26	15	36	15	1	572	59.6	6.61	848	15	2.742	2.215	1.812	0.0167214	0.0283396	0.0469802	56.6	125.4	155.2	102.6	0.91	15.27	5.74	5.18	High	High	High	High	High	High	High	High
FALSE	High	Master Protein	NP_651140.1	CG4434 [Drosophila melanogaster]	0	36.065	21	9	16	9	1	535	59.9	8.56	364	9	2.737	3.021	5.334	0.05803	0.0590517	0.034933	38.2	115.3	104.4	203.5	4.58	18.43	28.77	19.56	High	High	High	High	High	High	High	High
FALSE	High	Master Protein	NP_001189136.1	uncharacterized protein Dmel_CG14184, isoform B [Drosophila melanogaster]	0	17.02	37	5	6	5	1	180	20.5	6.79	96	5	2.734	2.605	2.568	0.0218385	0.0356249	0.0391428	47.1	122.7	128.8	121	0.88	17.04	1.74	10.12	High	High	High	High	High	High	High	High
FALSE	High	Master Protein	NP_725339.1	short stop, isoform H [Drosophila melanogaster]	0	472.032	19	144	197	37	1	8805	988.9	5.71	3320	144	2.733	2.532	2.278	0.0412584	0.063552	0.0891366	51.3	129.9	140.2	116.8	5.67	8.75	2.97	9.27	High	High	High	High	High	High	High	High
FALSE	High	Master Protein	NP_524469.2	regulatory particle triple-A ATPase 2, isoform A [Drosophila melanogaster]	0	97.771	45	24	64	23	1	439	49.3	6.58	1061	24	2.731	2.133	1.945	0.0218385	0.0487319	0.0727387	55.7	118.8	152.1	108.3	2.87	23.96	1.65	6.96	High	High	High	High	High	High	High	High
FALSE	High	Master Protein	NP_001260442.1	uncharacterized protein Dmel_CG43778, isoform A [Drosophila melanogaster]	0.002	15.262	5	3	6	3	1	963	106.8	6.77	231	3	2.722	2.379	2.175	0.0162213	0.0224811	0.026595	52.6	125.2	143.3	114.5	6.52	11.02	0.97	0.91	High	High	High	High	High	High	High	High
FALSE	High	Master Protein	NP_001137744.1	sulfotransferase 3, isoform B [Drosophila melanogaster]	0.005	6.695	10	2	3	2	1	313	36.9	6.76	32	2	2.722	4.932	3.944	0.145115	0.0566595	0.0879202	36.5	179.9	99.3	143.9	16.22	41.67	9.3	32.41	High	High	High	High	High	High	High	High
FALSE	High	Master Protein	NP_001246912.1	uncharacterized protein Dmel_CG43427, isoform O [Drosophila melanogaster]	0.002	13.349	4	4	5	4	1	1541	169.7	5.96	154	4	2.719	2.959	2.222	0.783834	0.791027	0.988029	44.9	132.9	122.2	99.8	12.41	76.21	62.41	49.14	High	High	High	High	High	High	High	High
FALSE	High	Master Protein	NP_610460.1	alicorn, isoform A [Drosophila melanogaster]	0	37.254	23	8	18	8	1	341	36.4	5.63	457	8	2.717	2.444	2.16	0.0402569	0.0673055	0.100101	51.4	125.6	139.6	111	5.03	15.29	5.28	13.44	High	High	High	High	High	High	High	High
FALSE	High	Master Protein	NP_608561.2	CG4415, isoform A [Drosophila melanogaster]	0	17.827	12	4	10	4	1	347	37.2	8.13	194	4	2.71	3.617	6.942	0.0410017	0.0356249	0.0218664	32.5	117.5	88	225.5	7.7	0.89	11.02	0.62	High	High	High	High	High	High	High	High
FALSE	High	Master Protein	NP_648165.1	CG8042 [Drosophila melanogaster]	0	87.12	33	21	48	21	1	656	71.2	6.74	1401	21	2.71	2.564	3.523	0.0218385	0.0313543	0.0213943	44.9	115	121.5	158	0.54	0.18	7.72	5.04	High	High	High	High	High	High	High	High
FALSE	High	Master Protein	NP_001162632.2	futsch, isoform E [Drosophila melanogaster]	0	420.245	34	107	165	107	1	5495	591.7	4.97	3154	107	2.708	2.366	2.665	0.072186	0.131511	0.101816	50.6	119.8	137.1	134.9	9.27	8.37	27.64	12.72	High	High	High	High	High	High	High	High
FALSE	High	Master Protein	NP_647841.1	uncharacterized protein Dmel_CG14982, isoform B [Drosophila melanogaster]	0.003	8.353	4	3	4	3	1	773	84.8	8.22	77	3	2.702	2.366	2.039	0.0609045	0.108265	0.173594	52.7	124.6	142.3	107.4	10.69	1.84	15.87	18.62	High	High	High	High	High	High	High	High
FALSE	High	Master Protein	NP_477369.1	TER94, isoform A [Drosophila melanogaster]	0	333.919	57	52	246	2	1	801	88.8	5.35	5493	52	2.701	1.501	1.4	0.174727	0.884317	0.988029	64.9	97.4	175.2	90.8	30.59	9.96	17.12	40.76	High	High	High	High	High	High	High	High
FALSE	High	Master Protein	NP_648112.2	Sh3beta, isoform B [Drosophila melanogaster]	0	51.007	63	8	38	1	1	158	17.5	4.53	944	8	2.694	3.025	2.048	0.0940293	0.0915068	0.249998	50.2	151.8	135.2	102.8	16.8	42.77	7.17	1.97	High	High	High	High	High	High	High	High
FALSE	High	Master Protein	NP_647887.1	CG1316 [Drosophila melanogaster]	0	24.901	17	8	13	8	1	470	52.4	6.71	172	8	2.692	2.159	3.079	0.0500672	0.12052	0.0600275	48.3	104.4	130.1	148.9	5.05	27.54	13.39	20.5	High	High	High	High	High	High	High	High
FALSE	Low	Master Protein	NP_648990.1	U4-U6 small nuclear riboprotein factor 60K [Drosophila melanogaster]	0.054	2.292	1	1	1	1	1	553	61.5	6.21	31	1	2.691	2.462	1.697	0.0779777	0.125719	0.403054	49.2	121.1	132.4	83.5	6.44	2.19	38.47	17.44	High	High	High	High	High	High	High	High
FALSE	High	Master Protein	NP_001163786.1	Rho GTPase activating protein at 100F, isoform D [Drosophila melanogaster]	0	117.831	18	27	58	27	1	1866	198.2	9.61	1855	27	2.686	1.981	2.575	0.0345227	0.1026	0.0589064	52.7	104.3	141.5	135.6	11.35	12.34	12.71	4.39	High	High	High	High	High	High	High	High
FALSE	High	Master Protein	NP_511136.2	furrowed, isoform A [Drosophila melanogaster]	0.002	14.592	5	4	8	4	1	1174	128.1	5.81	144	4	2.685	3.133	2.003	0.0292063	0.0356249	0.0890329	50.5	158.4	135.7	101.2	20.43	6.71	11.38	14.19	High	High	High	High	High	High	High	High
FALSE	High	Master Protein	NP_572801.2	uncharacterized protein Dmel_CG42258, isoform C [Drosophila melanogaster]	0	62.527	29	8	67	8	1	465	47.7	4.93	1438	8	2.681	2.521	2.316	0.102585	0.146226	0.186216	50.7	127.7	135.8	117.3	8.62	11.21	2.37	2.91	High	High	High	High	High	High	High	High
FALSE	High	Master Protein	NP_001261050.1	quaking related 54B, isoform E [Drosophila melanogaster]	0.008	5.249	3	2	2	2	1	617	66.7	8.72	41	2	2.679	2.5	1.959	0.233457	0.319887	0.56028	51.6	128.9	138.2	101	4.39	13.76	9.69	3.64	High	High	High	High	High	High	High	High
FALSE	High	Master Protein	NP_787122.1	ankyrin, isoform B [Drosophila melanogaster]	0	154.368	26	36	94	34	1	1549	170.1	7.05	2070	36	2.677	1.993	1.849	0.0149001	0.0224811	0.0238667	58.2	116	155.7	107.6	2.12	8.27	1.03	7.78	High	High	High	High	High	High	High	High
FALSE	Medium	Master Protein	NP_650203.3	uncharacterized protein Dmel_CG18549 [Drosophila melanogaster]	0.032	3.024	4	2	3	2	1	436	47.8	6.4	28	2	2.675	2.636	1.784	0.0308706	0.041678	0.14249	54.4	143.5	145.6	97.1	9.48	16.11	10.8	7.82	High	High	High	High	High	High	High	High
FALSE	High	Master Protein	NP_001163211.1	par-1, isoform T [Drosophila melanogaster]	0	60.243	19	20	33	2	1	1058	114.8	9.88	360	20	2.673	3.038	2.645	0.141935	0.128957	0.178024	45.7	138.7	122.1	120.8	12.88	4.78	6.31	7.84	High	High	High	High	High	High	High	High
FALSE	High	Master Protein	NP_477454.1	Aac11 [Drosophila melanogaster]	0	19.099	13	6	8	6	1	536	59.9	6.76	100	6	2.671	2.143	1.546	0.0736168	0.173756	0.537009	57.6	123.4	153.8	89	10.11	34.73	10.54	5.05	High	High	High	High	High	High	High	High
FALSE	High	Master Protein	NP_610170.2	laccase 2, isoform E [Drosophila melanogaster]	0	17.366	6	5	8	5	1	784	87.2	6.68	197	5	2.67	3.27	2.016	0.0697807	0.056118	0.201365	49.8	162.9	133	100.5	10.97	4.46	14.64	33.6	High	High	High	High	High	High	High	High
FALSE	High	Master Protein	NP_608978.2	beta galactosidase, isoform A [Drosophila melanogaster]	0	110.996	33	21	63	21	1	672	75.3	5.03	1461	21	2.669	2.221	3.026	0.0477759	0.102397	0.0584443	50.6	112.3	135	153	14.79	12.82	0.29	10.98	High	High	High	High	High	High	High	High
FALSE	High	Master Protein	NP_001260956.1	vesicular monoamine transporter, isoform F [Drosophila melanogaster]	0	15.666	9	5	12	1	1	610	65.6	5.19	126	5	2.667	2.685	2.391	0.133685	0.159334	0.21249	47.7	128	127.2	114	19.54	28.92	5.44	1.56	High	High	High	High	High	High	High	High
FALSE	High	Master Protein	NP_729901.1	combover, isoform A [Drosophila melanogaster]	0	38.886	9	11	15	11	1	1657	183.9	5.81	389	11	2.662	2.641	4.485	0.123547	0.152102	0.0628258	43	113.7	114.6	193.1	13.09	32.28	6.07	36.41	High	High	High	High	High	High	High	High
FALSE	Low	Master Protein	NP_726709.2	uncharacterized protein Dmel_CG32815, isoform C [Drosophila melanogaster]	0.053	2.311	2	1	1	1	1	382	40.6	9.69	39	1	2.662	3.444	2.648	0.211977	0.145095	0.251807	46.9	161.5	124.9	124.2	43.43	23.4	4.29	4.57	High	High	High	High	High	High	High	High
FALSE	High	Master Protein	NP_610781.1	CG8525, isoform A [Drosophila melanogaster]	0.002	10.721	7	3	3	3	1	347	38.5	7.87	72	3	2.662	1.034	2.692	0.0327815	1	0.0509246	59.5	61.5	158.3	160.1	10.69	2.41	0.07	24.3	High	High	High	High	High	High	High	High
FALSE	High	Master Protein	NP_524219.1	alpha catenin, isoform A [Drosophila melanogaster]	0	93.3	31	25	49	25	1	917	102.4	6.43	862	25	2.661	2.187	1.83	0.0174167	0.0320644	0.0495975	56.3	123	149.7	102.9	0.33	9.02	1.83	1.98	High	High	High	High	High	High	High	High
FALSE	High	Master Protein	NP_727600.1	uncharacterized protein Dmel_CG32655 [Drosophila melanogaster]	0.005	6.615	9	2	2	2	1	330	36.7	5.12	28	2	2.658	3.344	6.879	0.59283	0.483102	0.182377	31.4	105	83.4	216	67.68	10.41	26.69	12.34	High	High	High	High	High	High	High	High
FALSE	High	Master Protein	NP_610715.1	proteasome inhibitor 31 kDa, isoform A [Drosophila melanogaster]	0	17.639	21	4	11	4	1	270	30.1	5.53	183	4	2.658	1.809	2.462	0.205421	0.613214	0.285871	54.8	99.1	145.7	134.9	15.69	20.53	10.74	11.82	High	High	High	High	High	High	High	High
FALSE	High	Master Protein	NP_608878.1	hoepel2 [Drosophila melanogaster]	0.003	8.501	4	3	4	3	1	846	94.6	6.47	130	3	2.653	2.176	3.097	0.27243	0.49383	0.230703	45.8	99.7	121.6	142	12.67	8.18	9.3	4.53	High	High	High	High	High	High	High	High
FALSE	High	Master Protein	NP_651054.1	CG5376 [Drosophila melanogaster]	0.005	7.099	10	2	2	2	1	229	26.3	6.64	46	2	2.65	2.614	2.015	0.0479939	0.0654043	0.143896	53.2	139	140.9	107.1	9.33	10.51	24.73	22.03	High	High	High	High	High	High	High	High
FALSE	High	Master Protein	NP_523917.2	Ras oncogene at 64B [Drosophila melanogaster]	0.002	12.691	22	3	7	3	1	192	22.2	6.77	174	3	2.649	1.42	1.609	0.196241	0.98922	0.779979	64.9	92.1	171.9	104.4	15.86	22.38	10.7	30.45	High	High	High	High	High	High	High	High
FALSE	High	Master Protein	NP_731269.2	CG8112, isoform B [Drosophila melanogaster]	0.002	11.748	5	3	7	3	1	559	65.8	8.94	151	3	2.647	2.364	1.746	0.0218385	0.0356249	0.091439	55.2	130.5	146.1	96.4	14.28	6.05	10.79	8.78	High	High	High	High	High	High	High	High
FALSE	High	Master Protein	NP_650805.1	CG5316, isoform B [Drosophila melanogaster]	0	16.468	10	5	6	5	1	662	76.4	9.44	50	5	2.645	2.956	6.306	0.361365	0.330841	0.104212	35.7	105.5	94.4	225.2	15.21	11.68	22.76	68.73	High	High	High	High	High	High	High	High
FALSE	High	Master Protein	NP_647703.1	CG1275, isoform B [Drosophila melanogaster]	0	18.504	5	2	20	2	1	340	36	8.1	344	2	2.644	1.873	2.302	0.0736168	0.265152	0.143645	57.2	107	151.2	131.6	24.14	31.18	6.46	8	High	High	High	High	High	High	High	High
FALSE	High	Master Protein	NP_610384.1	maltase A8 [Drosophila melanogaster]	0	45.228	22	15	26	14	1	588	67	4.97	333	15	2.643	2.207	7.975	0.130242	0.254911	0.039	33.5	73.8	88.4	266.8	13.64	8.11	7.69	42.89	High	High	High	High	High	High	High	High
FALSE	High	Master Protein	NP_611790.1	eIF2B-delta, isoform A [Drosophila melanogaster]	0	44.277	23	12	22	12	1	626	67.6	9.44	517	12	2.639	1.837	1.695	0.0345227	0.12944	0.182377	59.6	109.4	157.2	101	3.59	27.61	4.55	9.3	High	High	High	High	High	High	High	High
FALSE	High	Master Protein	NP_649435.2	uncharacterized protein Dmel_CG12581, isoform A [Drosophila melanogaster]	0.004	7.247	4	2	3	2	1	665	70.7	9.73	100	2	2.637	2.224	1.522	0.130857	0.2487	0.743824	58.7	130.5	154.8	89.4	4.47	4.04	17.12	22.66	High	High	High	High	High	High	High	High
FALSE	High	Master Protein	NP_650179.1	CG4115 [Drosophila melanogaster]	0	19.15	30	6	12	5	1	220	25.3	7.58	207	6	2.634	3.556	2.605	0.0530245	0.0383175	0.07878	47.1	167.6	124.2	122.8	0.63	23.17	18.23	5.62	High	High	High	High	High	High	High	High
FALSE	High	Master Protein	NP_001261962.1	Abl tyrosine kinase, isoform F [Drosophila melanogaster]	0.01	4.815	1	2	4	1	1	1723	183.6	8.47	53	2	2.633	1.316	2.05	0.254738	1	0.520931	64.1	84.4	168.8	131.4	2.16	31.82	6.25	8.23	High	High	High	High	High	High	High	High
FALSE	High	Master Protein	NP_001163538.1	like-AP180, isoform D [Drosophila melanogaster]	0	65.741	15	13	29	4	1	788	84.2	7.27	680	13	2.631	2.483	2.396	0.207934	0.279785	0.303481	50.4	125.1	132.5	120.7	1.8	6.3	5.45	36.51	High	High	High	High	High	High	High	High
FALSE	High	Master Protein	NP_651049.3	adaptor protein complex 2, mu subunit, isoform B [Drosophila melanogaster]	0	35.083	26	12	30	12	1	437	49.8	9.48	670	12	2.629	2.046	2.113	0.0197339	0.0356249	0.0391428	56.7	116	149.1	119.8	0.07	16.58	6.36	1.01	High	High	High	High	High	High	High	High
FALSE	High	Master Protein	NP_573286.1	CG6123, isoform A [Drosophila melanogaster]	0.002	10.023	6	3	5	3	1	614	64.1	10.2	122	3	2.628	2.741	2.318	0.0781284	0.0913652	0.144854	50	137	131.3	115.9	30.38	5.55	16.47	2.27	High	High	High	High	High	High	High	High
FALSE	Medium	Master Protein	NP_001188788.2	CG7299, isoform C [Drosophila melanogaster]	0.019	3.792	6	1	1	1	1	177	16.2	6.62	48	1	2.626	2.246	1.626	0.457365	0.668425	1	59.4	133.4	155.9	96.5	2.68	52.83	38.39	41.04	High	High	High	High	High	High	High	High
FALSE	High	Master Protein	NP_569983.1	CG3630, isoform A [Drosophila melanogaster]	0	19.286	18	4	9	4	1	371	39.4	5.05	127	4	2.625	3.748	1.389	0.140279	0.0809598	0.940355	49.5	185.4	129.8	68.7	10.33	13.5	16.03	16.04	High	High	High	High	High	High	High	High
FALSE	Medium	Master Protein	NP_609805.1	uncharacterized protein Dmel_CG17904 [Drosophila melanogaster]	0.012	4.408	5	2	2	2	1	311	33	5.05	46	2	2.624	1.345	2.356	0.0149001	0.100838	0.0195785	61.1	82.2	160.4	144	11.97	0.38	2.86	3.67	High	High	High	High	High	High	High	High
FALSE	High	Master Protein	NP_001104092.2	JYalpha [Drosophila melanogaster]	0	68.667	11	11	91	3	1	1009	112.3	5.45	2157	11	2.624	2.285	3.869	0.0519016	0.0975108	0.0429756	47.6	108.9	125	184.4	17.23	4.29	22.8	0.35	High	High	High	High	High	High	High	High
FALSE	High	Master Protein	NP_610301.1	CG1358, isoform A [Drosophila melanogaster]	0	22.358	9	4	35	4	1	482	52.2	5.49	714	4	2.621	1.57	2.048	0.0476376	0.355849	0.133166	59.9	94.1	157.1	122.7	11.1	2.39	1.35	6.17	High	High	High	High	High	High	High	High
FALSE	High	Master Protein	NP_651890.1	CG2187, isoform A [Drosophila melanogaster]	0	25.892	7	8	13	7	1	623	68.7	8.63	236	8	2.619	2.298	0.903	0.0582003	0.10554	1	61.1	140.4	160	55.1	3.85	3.15	10.08	5.96	High	High	High	High	High	High	High	High
FALSE	High	Master Protein	NP_001286795.1	kazachoc, isoform G [Drosophila melanogaster]	0	194.859	27	32	146	2	1	1077	119.6	6.89	2877	32	2.619	1.499	2.016	0.0174167	0.0963434	0.0391428	60.9	91.3	159.5	122.7	13.07	4.16	3.91	11.09	High	High	High	High	High	High	High	High
FALSE	High	Master Protein	NP_609965.1	RtcB-like [Drosophila melanogaster]	0.002	11.03	4	2	4	2	1	506	55.9	7.69	123	2	2.613	2.301	2.67	0.0218385	0.0359074	0.0348736	50.5	116.3	132	134.9	2.65	22.64	3.36	0.89	High	High	High	High	High	High	High	High
FALSE	Low	Master Protein	NP_649261.1	HP1 and insulator partner protein 1, isoform A [Drosophila melanogaster]	0.064	2.11	1	1	1	1	1	926	99.9	6.89	30	1	2.611	3.648	1.54	0.27593	0.164853	0.944089	48.2	175.7	125.7	74.2	36.03	16.19	6.53	44.65	High	High	High	High	High	High	High	High
FALSE	High	Master Protein	NP_733350.1	uncharacterized protein Dmel_CG31030, isoform A [Drosophila melanogaster]	0	62.897	23	10	38	10	1	384	42.4	5.38	928	10	2.608	2.12	2.049	0.0167214	0.0283396	0.0320538	57.8	122.4	150.6	118.4	12.53	5.85	7.86	4.63	High	High	High	High	High	High	High	High
FALSE	High	Master Protein	NP_001263058.1	regulatory particle non-ATPase 2, isoform C [Drosophila melanogaster]	0	87.383	23	19	40	19	1	1020	113.1	5.19	852	19	2.607	1.937	1.618	0.0328092	0.0978657	0.207905	59.7	115.7	155.7	96.7	10.99	16.48	7.37	19.49	High	High	High	High	High	High	High	High
FALSE	High	Master Protein	NP_608787.1	CG3213 [Drosophila melanogaster]	0	24.998	13	9	14	9	1	676	76.4	5.31	120	9	2.606	2.24	4.501	0.0583122	0.111472	0.0383887	44.3	99.2	115.4	199.3	1.19	22.43	29.22	7.64	High	High	High	High	High	High	High	High
FALSE	High	Master Protein	NP_611321.3	imaginal disc growth factor 5 [Drosophila melanogaster]	0	37.068	26	7	21	6	1	444	50.1	6.8	604	7	2.606	1.398	1.522	0.0514859	0.621549	0.42799	66.7	93.3	173.8	101.5	1.96	5.39	0.8	23.62	High	High	High	High	High	High	High	High
FALSE	High	Master Protein	NP_569875.2	CG3699 [Drosophila melanogaster]	0	69.094	66	15	30	15	1	251	26	8.97	852	15	2.605	2.19	2.875	0.0211515	0.0356249	0.0238667	52.6	115.2	137	151.2	18.17	7.04	2.38	3.02	High	High	High	High	High	High	High	High
FALSE	High	Master Protein	NP_001263137.1	chaoptin, isoform D [Drosophila melanogaster]	0	469.202	39	54	491	54	1	1338	154.6	6.81	12341	54	2.602	1.388	1.283	0.0410423	0.545452	0.777477	69	95.8	179.6	88.5	10.34	22.4	3	16.8	High	High	High	High	High	High	High	High
FALSE	High	Master Protein	NP_610925.3	prosap, isoform A [Drosophila melanogaster]	0	18.47	4	5	5	5	1	1871	198.9	8.44	188	5	2.601	2.915	2.544	0.112046	0.103647	0.147763	47	137	122.3	119.6	11.67	0.31	12.26	25.73	High	High	High	High	High	High	High	High
FALSE	High	Master Protein	NP_730432.1	CG9368, isoform A [Drosophila melanogaster]	0	56.097	54	11	43	11	1	182	19.3	9.44	1120	11	2.598	2.479	2.193	0.0372492	0.0526973	0.0819987	53.4	132.3	138.7	117.1	8.75	0.29	14.1	10.36	High	High	High	High	High	High	High	High
FALSE	High	Master Protein	NP_001137683.2	Eps15 homology domain containing protein-binding protein 1, isoform I [Drosophila melanogaster]	0	23.905	6	7	11	7	1	994	112.1	6.21	186	7	2.597	2.338	2.144	0.0568636	0.0963434	0.132611	52.6	123	136.6	112.8	3.96	27.46	14.43	7.96	High	High	High	High	High	High	High	High
FALSE	High	Master Protein	NP_523601.2	paxillin, isoform A [Drosophila melanogaster]	0	16.875	12	4	6	4	1	581	64.6	6.71	280	4	2.595	2.812	1.478	0.091496	0.095341	0.679419	53.6	150.8	139.1	79.2	14.19	7.01	34.25	4.76	High	High	High	High	High	High	High	High
FALSE	High	Master Protein	NP_650816.3	uncharacterized protein Dmel_CG17751 [Drosophila melanogaster]	0	21.171	6	3	11	3	1	533	59.8	7.91	415	3	2.595	0.392	0.405	0.152148	0.191228	0.208062	95.4	37.4	247.4	38.6	39.92	15.19	19.12	23.02	High	High	High	High	High	High	High	High
FALSE	High	Master Protein	NP_001246792.1	uncharacterized protein Dmel_CG45057, isoform B [Drosophila melanogaster]	0	36.941	42	9	17	9	1	192	20.6	9.2	278	9	2.592	2.352	2.023	0.187866	0.282263	0.414923	55.7	131	144.4	112.7	1.22	31.61	10.39	31.37	High	High	High	High	High	High	High	High
FALSE	High	Master Protein	NP_609047.1	cytochrome c oxidase subunit 5B-like [Drosophila melanogaster]	0.002	10.579	19	2	4	2	1	154	17.2	9.55	89	2	2.592	3.283	2.909	0.0615145	0.0469186	0.0673716	45	147.9	116.8	131.1	0.47	31.38	15.23	0.92	High	High	High	High	High	High	High	High
FALSE	High	Master Protein	NP_649598.1	CG1208, isoform B [Drosophila melanogaster]	0	18.181	9	4	9	3	1	496	53.9	6.24	188	4	2.592	2.527	3.065	0.0536026	0.0760162	0.0588925	48.9	123.6	126.7	149.9	12.93	24.67	11.02	15.13	High	High	High	High	High	High	High	High
FALSE	High	Master Protein	NP_001259174.1	corkscrew, isoform D [Drosophila melanogaster]	0.002	11.284	6	4	4	4	1	894	98.2	8.1	66	4	2.589	2.987	2.336	0.019422	0.0224811	0.0301458	48.7	145.4	126	113.7	2.93	1.44	7.31	14.32	High	High	High	High	High	High	High	High
FALSE	High	Master Protein	NP_723952.1	Ca[2+]-channel protein alpha[[1]] subunit D, isoform C [Drosophila melanogaster]	0	44.235	6	11	23	11	1	2552	280.6	5.43	777	11	2.589	2.985	2.111	0.0699787	0.0652921	0.163791	50	149.2	129.4	105.6	7.27	11.63	0.34	20.12	High	High	High	High	High	High	High	High
FALSE	High	Master Protein	NP_610230.3	CG3409, isoform A [Drosophila melanogaster]	0.002	15.168	7	5	5	5	1	894	98.8	6.64	74	5	2.587	1.744	1.79	0.184786	0.608399	0.56629	60	104.7	155.3	107.4	30.08	44.95	13.6	6.01	High	High	High	High	High	High	High	High
FALSE	High	Master Protein	NP_572842.1	found in neurons, isoform A [Drosophila melanogaster]	0.002	12.56	11	4	4	3	1	356	38.3	9.14	97	4	2.587	2.583	1.889	0.0225584	0.0356249	0.0766489	52.1	134.5	134.7	98.4	1.24	11.61	12.24	3.39	High	High	High	High	High	High	High	High
FALSE	High	Master Protein	NP_001260005.1	uncharacterized protein Dmel_CG43707, isoform E [Drosophila melanogaster]	0	18.184	4	7	7	7	1	2021	225.9	7.3	103	7	2.587	2.709	2.926	0.0908228	0.101494	0.0893427	46.4	125.6	119.9	135.6	4.26	8.24	8	5.65	High	High	High	High	High	High	High	High
FALSE	High	Master Protein	NP_995639.1	adipokinetic hormone receptor, isoform C [Drosophila melanogaster]	0.004	7.813	5	3	4	3	1	455	51.4	9.13	64	3	2.586	1.437	1.229	0.0218385	0.182926	0.562716	71.1	102.2	183.9	87.4	7.33	5.51	4.91	15.6	High	High	High	High	High	High	High	High
FALSE	High	Master Protein	NP_523810.2	quaking related 58E-2, isoform A [Drosophila melanogaster]	0	29.159	25	9	14	8	1	416	44.1	9.64	197	9	2.584	2.062	1.753	0.053054	0.131171	0.235894	59.6	122.8	153.9	104.4	1.54	33.73	2.13	11.66	High	High	High	High	High	High	High	High
FALSE	High	Master Protein	NP_995648.1	PDGF- and VEGF-receptor related, isoform E [Drosophila melanogaster]	0	85.965	18	23	42	1	1	1503	169.4	5.85	747	23	2.584	1.831	1.848	0.106721	0.359398	0.345047	60.1	110	155.3	111	16.4	3.78	5.58	17.54	High	High	High	High	High	High	High	High
FALSE	High	Master Protein	NP_001163769.1	vacuolar H[+] ATPase 100kD subunit 1, isoform J [Drosophila melanogaster]	0	162.957	25	28	178	3	1	852	96.8	6.51	4298	28	2.583	2.211	2.095	0.0439692	0.0872198	0.109204	54.5	120.6	140.9	114.2	0.36	7.02	1.09	4.52	High	High	High	High	High	High	High	High
FALSE	High	Master Protein	NP_001259267.1	Ca[2+]-channel protein alpha[[1]] subunit T, isoform F [Drosophila melanogaster]	0.002	11.713	1	5	6	5	1	3218	355.5	8.82	111	5	2.583	2.141	2.37	0.213756	0.395311	0.307915	52.7	112.8	136	124.8	14.76	18.17	3.92	15	High	High	High	High	High	High	High	High
FALSE	High	Master Protein	NP_730347.1	uncharacterized protein Dmel_CG32199 [Drosophila melanogaster]	0	18.848	15	7	9	7	1	509	58.8	9.33	90	7	2.581	2.826	7.199	0.0493674	0.0525678	0.0233811	33.9	95.9	87.6	244.3	13.29	2.74	16.23	24.7	High	High	High	High	High	High	High	High
FALSE	High	Master Protein	NP_001027277.1	Cadherin-N, isoform L [Drosophila melanogaster]	0	213.06	18	49	123	48	1	3101	347.3	5.06	2293	49	2.58	2.169	1.616	0.0225584	0.044492	0.144854	58.9	127.7	152	95.2	1.91	7.14	7.18	0.09	High	High	High	High	High	High	High	High
FALSE	Medium	Master Protein	NP_001262646.1	nonA-like, isoform B [Drosophila melanogaster]	0.032	3.055	1	1	1	1	1	630	69.6	8.62	37	1	2.578	2.269	4.466	0.361074	0.530966	0.155673	39.1	88.8	100.8	174.7	40.56	58.53	25.19	15.13	High	High	High	High	High	High	High	High
FALSE	Medium	Master Protein	NP_001096945.1	uncharacterized protein Dmel_CG15211, isoform B [Drosophila melanogaster]	0.03	3.259	5	1	3	1	1	177	18.9	8.19	94	1	2.575	2.415	2.057	0.12258	0.175587	0.277116	54	130.4	139.1	111.1	0.31	24.09	2.59	26.76	High	High	High	High	High	High	High	High
FALSE	High	Master Protein	NP_001036341.2	homer, isoform E [Drosophila melanogaster]	0	51.08	25	13	26	13	1	531	57.3	8.65	641	13	2.575	1.95	2.37	0.0494507	0.14626	0.0845031	55	107.4	141.8	130.5	5.22	5.28	14.39	10.7	High	High	High	High	High	High	High	High
FALSE	High	Master Protein	NP_524956.2	serpin 38F, isoform A [Drosophila melanogaster]	0	33.552	18	8	18	8	1	372	41.7	8.25	433	8	2.574	3.705	11.142	0.0728048	0.0443581	0.0213943	25.6	94.8	65.9	285.1	2.81	25.42	9.79	29.53	High	High	High	High	High	High	High	High
FALSE	High	Master Protein	NP_001259076.1	metabotropic glutamate receptor, isoform B [Drosophila melanogaster]	0.002	11.776	5	4	5	4	1	976	108.4	7.25	114	4	2.571	1.469	1.707	0.284549	1	0.793678	65.8	96.6	169.1	112.3	25.38	25.46	3.34	6.22	High	High	High	High	High	High	High	High
FALSE	High	Master Protein	NP_001188761.1	Nckx30C, isoform E [Drosophila melanogaster]	0	37.497	11	5	22	5	1	872	94	8.27	1021	5	2.568	1.708	2.173	0.0378475	0.182926	0.0819987	59.1	101	151.9	128.5	12.34	27.92	4.23	0	High	High	High	High	High	High	High	High
FALSE	High	Master Protein	NP_724042.1	beat-IIIc, isoform A [Drosophila melanogaster]	0.002	12.407	8	3	5	3	1	383	42.4	8.78	158	3	2.568	2.79	1.894	0.0192319	0.0224811	0.0460499	53.5	149.2	137.3	101.3	6.92	7.78	5.84	1.68	High	High	High	High	High	High	High	High
FALSE	High	Master Protein	NP_608827.1	Trehalose-6-phosphate synthase 1 [Drosophila melanogaster]	0	158.247	38	33	136	32	1	809	91.1	6.86	2295	33	2.566	1.607	1.792	0.0495589	0.316927	0.203795	64.5	103.7	165.6	115.6	0.72	19.64	27.48	9.66	High	High	High	High	High	High	High	High
FALSE	High	Master Protein	NP_001261905.1	uncharacterized protein Dmel_CG17032, isoform B [Drosophila melanogaster]	0.003	8.434	4	1	3	1	1	312	30.9	9.31	119	1	2.565	1.878	1.289	0.208484	0.53846	1	60.5	113.6	155.2	78	8.48	34.9	1.12	36.5	High	High	High	High	High	High	High	High
FALSE	High	Master Protein	NP_001097549.1	GTPase activating protein and centrosome-associated, isoform B [Drosophila melanogaster]	0.002	9.555	3	4	6	4	1	1194	133.3	5.82	90	4	2.56	2.656	2.42	0.0563661	0.0671812	0.0890329	50.2	133.3	128.5	121.5	3.18	6.06	10.23	14.36	High	High	High	High	High	High	High	High
FALSE	Medium	Master Protein	NP_609505.1	discs large 5, isoform B [Drosophila melanogaster]	0.011	4.615	1	2	3	2	1	1916	209.7	8.05	57	2	2.56	1.67	1.848	0.319453	0.868281	0.722816	61.4	102.5	157.1	113.4	10	63	4.57	31.52	High	High	High	High	High	High	High	High
FALSE	High	Master Protein	NP_476666.1	armadillo, isoform A [Drosophila melanogaster]	0	64.472	21	12	36	12	1	843	91.1	5.58	1064	12	2.557	2.05	1.627	0.0250391	0.0578109	0.151414	60.6	124.2	155	98.6	10.07	15.47	9.02	7.99	High	High	High	High	High	High	High	High
FALSE	High	Master Protein	NP_727668.2	uncharacterized protein Dmel_CG32638 [Drosophila melanogaster]	0	16.869	26	2	17	2	1	159	17.7	6.95	410	2	2.557	2.011	1.849	0.0153992	0.0280995	0.034933	59.7	120	152.6	110.3	6.4	10.27	6.03	1.05	High	High	High	High	High	High	High	High
FALSE	High	Master Protein	NP_476856.1	Cystatin-like [Drosophila melanogaster]	0	53.2	65	8	30	7	1	126	13.4	4.75	664	8	2.555	2.167	1.187	0.273504	0.463563	1	61.3	132.9	156.7	72.8	3.19	43.27	6.56	24.15	High	High	High	High	High	High	High	High
FALSE	High	Master Protein	NP_725367.1	CG8468, isoform A [Drosophila melanogaster]	0	42.886	17	8	31	8	1	678	73.8	7.69	652	8	2.555	1.742	2.455	0.0838008	0.349375	0.124593	57	99.3	145.7	140	3.92	10.9	6.45	0.15	High	High	High	High	High	High	High	High
FALSE	High	Master Protein	NP_570062.1	uncharacterized protein Dmel_CG10802, isoform A [Drosophila melanogaster]	0.002	11.871	11	4	4	4	1	436	49.1	6.23	67	4	2.552	1.391	1.586	0.0540628	0.631137	0.353575	67.1	93.3	171.1	106.3	4.28	28.03	2.23	16.03	High	High	High	High	High	High	High	High
FALSE	Medium	Master Protein	NP_649933.1	uncharacterized protein Dmel_CG12950, isoform A [Drosophila melanogaster]	0.022	3.635	1	2	2	2	1	939	102.8	6.64	32	2	2.541	2.092	1.824	0.0215275	0.0356249	0.0579566	59.6	124.7	151.4	108.7	9.59	1.52	6.49	0.61	High	High	High	High	High	High	High	High
FALSE	High	Master Protein	NP_523377.1	rudimentary, isoform A [Drosophila melanogaster]	0	67.864	10	22	31	22	1	2224	246.5	6.64	669	22	2.539	1.98	1.103	0.0412584	0.108772	1	66.5	131.7	168.9	73.4	7.44	19.25	21.47	8.31	High	High	High	High	High	High	High	High
FALSE	High	Master Protein	NP_001260087.1	CG4230, isoform C [Drosophila melanogaster]	0	34.89	27	9	14	9	1	386	44.3	6.57	179	9	2.538	1.522	3.017	0.0325112	0.261325	0.0391428	55.1	83.9	139.9	166.3	9.43	15.52	3.01	1.78	High	High	High	High	High	High	High	High
FALSE	High	Master Protein	NP_724288.3	varicose, isoform B [Drosophila melanogaster]	0	82.365	27	18	47	18	1	636	72.3	7.31	701	18	2.536	2.295	1.696	0.0218385	0.0356249	0.0967461	58.4	134	148	99	6.56	16.42	12.65	7.81	High	High	High	High	High	High	High	High
FALSE	High	Master Protein	NP_001247267.1	myoblast city, isoform B [Drosophila melanogaster]	0	26.73	3	7	13	7	1	2008	230.5	7.43	269	7	2.535	1.62	1.81	0.303763	0.886883	0.722295	64.9	105.1	164.6	117.5	30.55	54.39	6.38	17.8	High	High	High	High	High	High	High	High
FALSE	High	Master Protein	NP_572699.2	uncharacterized protein Dmel_CG44422, isoform A [Drosophila melanogaster]	0	18.95	9	6	7	6	1	746	81	7.68	259	6	2.525	2.835	2.684	0.141935	0.129645	0.151414	47.6	135	120.2	127.8	25.26	19.38	7.28	8.61	High	High	High	High	High	High	High	High
FALSE	High	Master Protein	NP_731489.2	pugilist, isoform B [Drosophila melanogaster]	0	251.533	44	47	200	47	1	968	103.4	7.8	3950	47	2.524	2.154	3.338	0.0167214	0.0280995	0.018086	50.6	109	127.7	168.9	5	5.82	2.81	10.59	High	High	High	High	High	High	High	High
FALSE	High	Master Protein	NP_573068.3	CG8239, isoform A [Drosophila melanogaster]	0.002	13.543	13	4	5	4	1	388	42.8	6.83	207	4	2.523	1.887	1.567	0.0589669	0.184041	0.385989	60.2	113.7	152	94.4	30.66	9.04	11.65	2.36	High	High	High	High	High	High	High	High
FALSE	High	Master Protein	NP_477354.1	Hsp70/Hsp90 organizing protein [Drosophila melanogaster]	0	90.047	38	23	59	23	1	490	55.7	6.81	1042	23	2.522	1.954	2.752	0.0218385	0.0428614	0.0259592	53.3	104.1	134.4	146.6	10.43	9.43	5.57	10.92	High	High	High	High	High	High	High	High
FALSE	High	Master Protein	NP_001303342.1	Ran-binding protein M, isoform G [Drosophila melanogaster]	0	17.345	9	6	7	6	1	1127	123.7	5.19	132	6	2.518	2.443	2.016	0.0156152	0.0224811	0.026595	53.7	131.2	135.3	108.3	8.41	4.59	7.33	2.62	High	High	High	High	High	High	High	High
FALSE	High	Master Protein	NP_001014659.1	slowpoke, isoform I [Drosophila melanogaster]	0	32.954	12	10	14	10	1	1213	134.4	5.78	235	10	2.518	2.211	1.857	0.0218385	0.0369443	0.0686953	56.7	125.2	142.7	105.2	8.06	2.7	0.26	7.74	High	High	High	High	High	High	High	High
FALSE	High	Master Protein	NP_610531.1	secretory 24AB, isoform A [Drosophila melanogaster]	0	17.015	7	5	8	5	1	1184	129.3	7.62	231	5	2.518	1.984	2.233	0.023324	0.0569818	0.0513013	54.5	108.1	137.2	121.7	14.26	0.52	2.59	19.48	High	High	High	High	High	High	High	High
FALSE	High	Master Protein	NP_001246323.1	jet fuel, isoform B [Drosophila melanogaster]	0.002	13.28	8	3	6	3	1	762	83.3	6.61	229	3	2.518	2.413	2.552	0.122204	0.165514	0.147014	52.8	127.4	132.9	134.7	28.93	14.93	5.7	13.7	High	High	High	High	High	High	High	High
FALSE	High	Master Protein	NP_524805.1	serpin 43Aa [Drosophila melanogaster]	0.006	5.521	5	2	2	2	1	390	44.8	5.5	48	2	2.516	4.604	1.551	0.0653076	0.0356249	0.437868	47.4	218.4	119.4	73.6	17.96	27.46	12.95	1.01	High	High	High	High	High	High	High	High
FALSE	Medium	Master Protein	NP_649796.1	Autophagy-related 13 [Drosophila melanogaster]	0.038	2.77	2	1	1	1	1	523	56.9	6.76	0	1	2.515	1.328	1.778	0.325702	1	0.76612	67.4	89.6	169.6	119.9	16.86	56.66	8.33	37.95	High	High	High	High	High	High	High	High
FALSE	High	Master Protein	NP_611299.2	uncharacterized protein Dmel_CG10915, isoform A [Drosophila melanogaster]	0	24.901	11	8	10	8	1	609	65.4	7.06	114	8	2.514	2.153	2.507	0.0609045	0.122428	0.0825899	54.8	117.9	137.7	137.3	15.23	13.55	3.14	4.91	High	High	High	High	High	High	High	High
FALSE	High	Master Protein	NP_647793.1	uncharacterized protein Dmel_CG11505, isoform B [Drosophila melanogaster]	0	17.672	5	6	7	6	1	1531	161.9	8.75	133	6	2.513	2.261	2.183	0.0400833	0.0682316	0.0819987	53.2	120.2	133.6	116.1	18.13	0.38	3.24	7.76	High	High	High	High	High	High	High	High
FALSE	High	Master Protein	NP_001245894.1	oscillin, isoform C [Drosophila melanogaster]	0	21.279	10	4	9	4	1	273	30.8	6.23	365	4	2.511	2.413	2.095	0.0237418	0.035941	0.0600275	55.9	134.8	140.2	117	19.56	0	11.61	7.15	High	High	High	High	High	High	High	High
FALSE	High	Master Protein	NP_652021.1	uncharacterized protein Dmel_CG18031 [Drosophila melanogaster]	0	22.471	13	6	9	6	1	504	57.6	8.79	199	6	2.51	1.424	1.785	0.0603328	0.590184	0.229264	66.2	94.2	166.1	118.1	6.55	28.78	2.2	5	High	High	High	High	High	High	High	High
FALSE	High	Master Protein	NP_725714.1	CG6406, isoform A [Drosophila melanogaster]	0.004	7.472	8	2	3	2	1	544	59.9	6.67	40	2	2.509	2.443	2.643	0.152269	0.196479	0.16522	49.1	119.9	123.1	129.7	21.3	28.88	1.98	12.3	High	High	High	High	High	High	High	High
FALSE	High	Master Protein	NP_001260684.1	uncharacterized protein Dmel_CG42748, isoform K [Drosophila melanogaster]	0	28.225	5	7	12	7	1	2190	241.5	7.37	208	7	2.507	2.628	2.358	0.0676776	0.0791012	0.109459	52.5	138.1	131.7	123.9	11.81	8.87	5.46	17.79	High	High	High	High	High	High	High	High
FALSE	High	Master Protein	NP_001036283.1	bazooka, isoform B [Drosophila melanogaster]	0.004	7.267	1	2	4	2	1	1520	163.5	8.85	86	2	2.503	2.182	1.318	0.184357	0.310283	1	57.8	126.2	144.8	76.2	17.12	4.35	2.02	22.12	High	High	High	High	High	High	High	High
FALSE	High	Master Protein	NP_001188817.2	CG4587, isoform I [Drosophila melanogaster]	0	144.844	23	29	95	29	1	1271	143.6	6.34	1790	29	2.502	1.758	1.939	0.0218385	0.0794599	0.0628258	61.2	107.6	153.1	118.6	9.18	0.27	3.34	10.76	High	High	High	High	High	High	High	High
FALSE	High	Master Protein	NP_001263139.1	CG1607, isoform C [Drosophila melanogaster]	0	27.309	7	3	20	3	1	507	55.6	8.12	971	3	2.501	1.903	1.778	0.0209169	0.0387697	0.0594957	61.6	117.2	154.1	109.5	12.94	8.05	10.38	4.93	High	High	High	High	High	High	High	High
FALSE	High	Master Protein	NP_725849.1	5-hydroxytryptamine (serotonin) receptor 1A [Drosophila melanogaster]	0.003	9.2	7	3	3	3	1	834	89.5	5.86	131	3	2.501	1.863	1.756	0.248888	0.589836	0.677709	59.6	111	148.9	104.6	28.23	4.51	8.87	48.7	High	High	High	High	High	High	High	High
FALSE	High	Master Protein	NP_651391.1	target of brain insulin [Drosophila melanogaster]	0	126.83	29	23	128	23	1	657	74.6	5.03	3100	23	2.499	6.926	27.453	0.307218	0.0637979	0.0285496	12.9	89.1	32.1	353.2	0.9	23.97	8.17	60.42	High	High	High	High	High	High	High	High
FALSE	High	Master Protein	NP_001260588.1	uncharacterized protein Dmel_CG10188, isoform C [Drosophila melanogaster]	0.004	8.078	2	4	4	4	1	1319	146.1	7.59	44	4	2.498	2.345	1.867	0.151599	0.215979	0.41151	55.6	130.4	138.9	103.8	6.46	7.1	15.63	3.59	High	High	High	High	High	High	High	High
FALSE	High	Master Protein	NP_726557.3	synaptotagmin 7, isoform A [Drosophila melanogaster]	0	41.961	31	11	23	11	1	416	46.9	8.98	303	11	2.496	1.589	2.118	0.0237418	0.145272	0.0579715	60.6	96.3	151.3	128.4	20.3	10.68	0.57	2.91	High	High	High	High	High	High	High	High
FALSE	Medium	Master Protein	NP_724256.2	spire, isoform C [Drosophila melanogaster]	0.046	2.463	2	1	1	1	1	625	69.4	9.06	16	1	2.495	2.668	2.602	0.0818512	0.0890163	0.0986885	50.9	135.9	127	132.5	9.32	0.02	0.22	14.41	High	High	High	High	High	High	High	High
FALSE	High	Master Protein	NP_611047.2	CG8192 [Drosophila melanogaster]	0.002	11.054	13	4	6	4	1	431	50.5	6.44	109	4	2.495	2.964	1.453	0.141935	0.112669	0.819005	55.1	163.2	137.4	80	22.61	15.77	24.33	27.78	High	High	High	High	High	High	High	High
FALSE	High	Master Protein	NP_001286794.1	kazachoc, isoform F [Drosophila melanogaster]	0	195.976	29	33	149	2	1	1066	118.3	6.86	3136	33	2.495	1.272	2.611	0.206226	1	0.217544	58.3	74.2	145.5	152.3	40.53	22.32	15.91	6.13	High	High	High	High	High	High	High	High
FALSE	High	Master Protein	NP_001286919.1	uncharacterized protein Dmel_CG45186, isoform AE [Drosophila melanogaster]	0	33.525	3	11	12	1	1	4526	496.5	8.6	143	11	2.495	2.217	2.147	0.378474	0.545452	0.580737	52.4	116.1	130.7	112.4	30.19	19.74	9.68	21.52	High	High	High	High	High	High	High	High
FALSE	High	Master Protein	NP_524624.1	Purine-rich binding protein-alpha, isoform B [Drosophila melanogaster]	0	19.037	19	5	10	5	1	275	31.1	8.59	258	5	2.493	2.132	1.989	0.0275163	0.0526973	0.0737721	57.2	121.9	142.6	113.8	1.91	15.48	7.32	18.01	High	High	High	High	High	High	High	High
FALSE	Medium	Master Protein	NP_648820.1	uncharacterized protein Dmel_CG17026 [Drosophila melanogaster]	0.019	3.815	5	1	1	1	1	284	31.4	6.04	48	1	2.491	1.827	3.375	0.0890739	0.291702	0.0646921	50.4	92.1	125.6	170.1	37.53	1.92	5.12	14.23	High	High	High	High	High	High	High	High
FALSE	High	Master Protein	NP_648759.1	CG6888 [Drosophila melanogaster]	0	15.612	31	6	6	6	1	196	22	5.95	89	6	2.487	2.311	5.312	0.0998299	0.150324	0.0414859	41.4	95.7	102.9	219.9	0.38	23.86	15.03	16.7	High	High	High	High	High	High	High	High
FALSE	High	Master Protein	NP_001260426.1	vacuolar H[+] ATPase 68kD subunit 1, isoform B [Drosophila melanogaster]	0	248.434	66	35	331	17	1	614	68.3	5.29	10993	35	2.486	1.968	1.668	0.0205496	0.0357741	0.0684293	61.9	121.8	153.9	103.3	8.18	9.29	6.46	1.94	High	High	High	High	High	High	High	High
FALSE	High	Master Protein	NP_611382.1	Methionyl-tRNA synthetase [Drosophila melanogaster]	0	94.593	25	20	43	20	1	1022	112.4	8.51	1374	20	2.484	2.212	2.579	0.0354004	0.0605649	0.0513851	53	117.2	131.6	136.6	5.92	17.06	0.92	2.21	High	High	High	High	High	High	High	High
FALSE	High	Master Protein	NP_723870.1	wing blister, isoform B [Drosophila melanogaster]	0.005	6.21	0	2	4	1	1	3375	374.5	6.8	102	2	2.481	2.031	1.321	0.090968	0.204281	0.901072	64.6	131.3	160.3	85.4	17.58	27.97	8.78	8.35	High	High	High	High	High	High	High	High
FALSE	Medium	Master Protein	NP_728408.3	CG1801 [Drosophila melanogaster]	0.031	3.161	1	1	1	1	1	1655	190.1	8.54	28	1	2.48	2.231	3.411	0.136702	0.219841	0.0848904	49.5	110.4	122.7	168.8	25.44	36.08	16.23	17.28	High	High	High	High	High	High	High	High
FALSE	Low	Master Protein	NP_573102.1	defective proboscis extension response 18 [Drosophila melanogaster]	0.054	2.298	1	1	3	1	1	519	58.1	8.62	14	1	2.479	2.274	2.331	0.0353935	0.0550016	0.0610389	53.7	122.2	133.1	125.2	24.2	1.22	1.25	6.05	High	High	High	High	High	High	High	High
FALSE	High	Master Protein	NP_523831.1	Synaptosomal-associated protein 29kDa [Drosophila melanogaster]	0	33.048	36	9	29	9	1	284	31.6	5.17	503	9	2.478	1.967	1.59	0.0653917	0.169183	0.383206	61.4	120.7	152.1	97.6	0.48	6.66	8.39	25.96	High	High	High	High	High	High	High	High
FALSE	High	Master Protein	NP_001246118.1	dynamin associated protein 160, isoform D [Drosophila melanogaster]	0	84.433	21	23	44	23	1	1190	131.6	5.52	890	23	2.474	2.008	2.156	0.0341234	0.0791012	0.0687204	57.7	115.9	142.8	124.4	3.83	6.58	13.31	13.55	High	High	High	High	High	High	High	High
FALSE	High	Master Protein	NP_525080.3	Calmodulin-binding protein related to a Rab3 GDP/GTP exchange protein, isoform A [Drosophila melanogaster]	0	18.271	5	7	10	7	1	1671	186.9	6.39	166	7	2.473	2.339	2.157	0.026141	0.0399407	0.0589443	55	128.7	136.1	118.7	4.55	10.95	9.81	2.46	High	High	High	High	High	High	High	High
FALSE	High	Master Protein	NP_524417.1	septin 2, isoform A [Drosophila melanogaster]	0	45.404	27	11	20	11	1	419	48.4	7.61	253	11	2.473	2.054	2.171	0.0327576	0.0706896	0.0657885	57.9	118.9	143.1	125.7	12.2	8.3	0.25	3.43	High	High	High	High	High	High	High	High
FALSE	High	Master Protein	NP_648946.3	CG6652 [Drosophila melanogaster]	0.002	13.116	9	5	7	5	1	604	67.7	8.27	189	5	2.471	3.228	4.122	0.109576	0.0734009	0.0575312	43.3	139.7	106.9	178.3	16.66	21.61	27.73	1.15	High	High	High	High	High	High	High	High
FALSE	High	Master Protein	NP_732225.2	uncharacterized protein Dmel_CG31419 [Drosophila melanogaster]	0.002	11.411	13	3	6	3	1	238	26.6	9.07	126	3	2.47	2.334	6.593	0.141387	0.197317	0.042044	37.1	86.7	91.7	244.8	42.01	15.49	7.5	14.73	High	High	High	High	High	High	High	High
FALSE	High	Master Protein	NP_599144.1	patj, isoform A [Drosophila melanogaster]	0	51.239	20	13	24	13	1	871	92.8	4.97	591	13	2.469	1.998	2.073	0.0225584	0.0525678	0.0571437	56.2	112.2	138.7	116.5	0.69	9.87	13.25	0.69	High	High	High	High	High	High	High	High
FALSE	High	Master Protein	NP_523393.3	shaker, isoform B [Drosophila melanogaster]	0	21.91	7	6	13	3	1	616	70.2	6.11	184	6	2.468	2.023	1.695	0.124558	0.267442	0.467375	60.9	123.3	150.4	103.3	0.79	15.43	27.65	8.77	High	High	High	High	High	High	High	High
FALSE	High	Master Protein	NP_001284914.1	uncharacterized protein Dmel_CG16721, isoform C [Drosophila melanogaster]	0	21.49	17	5	6	5	1	494	56	5.71	139	5	2.468	1.789	2.091	0.114796	0.371608	0.222032	60.6	108.4	149.4	126.6	27.43	27.25	8.5	18.8	High	High	High	High	High	High	High	High
FALSE	High	Master Protein	NP_650528.1	CG6126 [Drosophila melanogaster]	0	56.925	14	10	47	10	1	555	60.8	7.15	898	10	2.464	1.842	1.695	0.0267196	0.0836248	0.125001	62.1	114.4	153.1	105.3	1.34	8.68	1.56	10.28	High	High	High	High	High	High	High	High
FALSE	High	Master Protein	NP_733058.1	uncharacterized protein Dmel_CG31121, isoform A [Drosophila melanogaster]	0.005	6.885	3	2	2	2	1	911	99.7	8.09	52	2	2.464	1.898	1.137	0.140279	0.359398	1	65.1	123.5	160.4	74	24.39	30.89	14.5	8.37	High	High	High	High	High	High	High	High
FALSE	High	Master Protein	NP_611046.2	eIF2B-gamma [Drosophila melanogaster]	0.002	13.308	5	3	6	3	1	455	50.6	7.55	83	3	2.463	1.478	1.27	0.091147	0.627832	0.984304	69.8	103.2	172	88.7	19.57	18.42	24.71	22.64	High	High	High	High	High	High	High	High
FALSE	High	Master Protein	NP_001260265.1	semaphorin 1a, isoform G [Drosophila melanogaster]	0	31.588	8	8	11	8	1	1131	126.3	7.24	231	8	2.463	2.262	1.87	0.0225584	0.0373747	0.0727387	57.6	130.4	141.9	107.8	8.54	2.81	2.36	1.57	High	High	High	High	High	High	High	High
FALSE	High	Master Protein	NP_536738.3	retinal degeneration C, isoform F [Drosophila melanogaster]	0	35.866	15	13	15	13	1	746	84.8	8.4	218	13	2.458	1.841	1.629	0.0251301	0.0791012	0.141149	62.4	114.9	153.4	101.7	13.6	8.79	1.56	10.38	High	High	High	High	High	High	High	High
FALSE	High	Master Protein	NP_001097494.1	uncharacterized protein Dmel_CG32264, isoform E [Drosophila melanogaster]	0.002	12.146	5	5	6	5	1	998	108.3	8.68	86	5	2.456	2.324	2.114	0.0536026	0.0815955	0.113537	55.3	128.5	135.8	116.9	1.38	9.81	7.91	6.46	High	High	High	High	High	High	High	High
FALSE	High	Master Protein	NP_649737.1	CG2641 [Drosophila melanogaster]	0.008	4.934	6	2	2	2	1	429	48.3	6.15	31	2	2.455	2.304	1.728	0.647094	0.774582	1	60.1	138.5	147.6	103.9	56.64	6.88	6.64	20.94	High	High	High	High	High	High	High	High
FALSE	High	Master Protein	NP_608858.3	C-type lectin 27kD, isoform A [Drosophila melanogaster]	0	46.864	35	10	25	10	1	231	26.3	8.16	497	10	2.455	2.29	1.613	0.0320519	0.0477403	0.178007	60.3	138.2	148.1	97.3	1.54	14.26	14.47	14.3	High	High	High	High	High	High	High	High
FALSE	High	Master Protein	NP_001260222.1	purity of essence, isoform B [Drosophila melanogaster]	0	83.466	6	27	41	27	1	5322	590.3	6.38	910	27	2.454	2.278	2.379	0.0568105	0.0913467	0.0837446	53	120.6	130	126	7.22	31.22	1.99	14.68	High	High	High	High	High	High	High	High
FALSE	High	Master Protein	NP_572694.1	dynein light intermediate chain, isoform A [Drosophila melanogaster]	0	58.927	27	12	34	12	1	493	54.4	6.02	1047	12	2.454	2.439	1.949	0.0413114	0.0529648	0.113133	55.7	135.9	136.8	108.6	5.09	14.62	11.15	3.95	High	High	High	High	High	High	High	High
FALSE	High	Master Protein	NP_724824.1	CG1648, isoform B [Drosophila melanogaster]	0	335.044	96	41	305	41	1	232	24.2	9.09	8683	41	2.454	2.257	2.496	0.11666	0.178581	0.14249	53.4	120.6	131	133.3	2.51	16.32	4.92	9.88	High	High	High	High	High	High	High	High
FALSE	High	Master Protein	NP_001286309.1	menage a trois, isoform D [Drosophila melanogaster]	0	80.341	35	20	35	2	1	546	61.6	5.55	609	20	2.452	1.74	4.013	0.0469103	0.193102	0.034933	48	83.5	117.7	192.5	16.18	0.26	6.66	18.01	High	High	High	High	High	High	High	High
FALSE	High	Master Protein	NP_610777.1	cuticular protein 49Ah [Drosophila melanogaster]	0.002	12.905	23	4	6	4	1	190	21.9	5.97	85	4	2.448	3.558	1.537	0.0804517	0.044492	0.496874	51.4	182.9	125.9	79	15.25	30.41	1.65	7.15	High	High	High	High	High	High	High	High
FALSE	High	Master Protein	NP_724335.2	defective transmitter release [Drosophila melanogaster]	0.003	8.48	2	3	3	3	1	1483	168.1	4.69	40	3	2.447	2.55	2.994	0.0653917	0.0781085	0.0611591	49.1	125.3	120.2	147.1	2.65	15.96	14.27	29.91	High	High	High	High	High	High	High	High
FALSE	High	Master Protein	NP_001334710.1	uncharacterized protein Dmel_CG46320, isoform B [Drosophila melanogaster]	0.005	6.382	35	2	4	2	1	54	6	9.7	85	2	2.445	1.716	2.18	0.0281209	0.116108	0.0600275	59.8	102.6	146.2	130.3	4.03	23.26	6.93	5.26	High	High	High	High	High	High	High	High
FALSE	High	Master Protein	NP_001189150.1	protein kinase, cAMP-dependent, regulatory subunit type 1, isoform V [Drosophila melanogaster]	0	33.989	9	6	15	1	1	464	51.8	5.52	509	6	2.437	1.741	1.225	0.221952	0.623484	1	71.7	124.8	174.8	87.8	4.64	15.68	2.16	3.42	High	High	High	High	High	High	High	High
FALSE	High	Master Protein	NP_001189227.1	RIM-binding protein, isoform F [Drosophila melanogaster]	0	72.36	11	16	29	16	1	1844	193.9	6.76	838	16	2.435	1.708	2.407	0.0412584	0.174654	0.0628258	57.3	98	139.6	138	9.77	12.46	10.98	12.62	High	High	High	High	High	High	High	High
FALSE	High	Master Protein	NP_650948.2	ubiquitin specific protease 8, isoform A [Drosophila melanogaster]	0.002	11.885	5	3	3	3	1	896	102.6	7.28	125	3	2.433	2.229	2.228	0.374576	0.514985	0.506575	53.2	118.6	129.4	118.5	49.82	26.45	22.24	7.74	High	High	High	High	High	High	High	High
FALSE	High	Master Protein	NP_725653.1	glutathione S transferase S1, isoform A [Drosophila melanogaster]	0	112.027	69	15	65	3	1	249	27.6	4.65	1764	15	2.429	1.981	3.161	0.188045	0.384675	0.12874	54.2	107.4	131.7	171.4	30.13	9.87	15.63	21.97	High	High	High	High	High	High	High	High
FALSE	High	Master Protein	NP_001137642.1	menage a trois, isoform B [Drosophila melanogaster]	0	78.571	36	20	33	2	1	556	62.6	5.49	586	20	2.427	1.534	0.785	0.0711524	0.459501	0.918951	72.7	111.5	176.4	57.1	1.5	20.37	3.55	19.54	High	High	High	High	High	High	High	High
FALSE	High	Master Protein	NP_523846.2	serotonin transporter, isoform A [Drosophila melanogaster]	0.004	7.717	4	2	3	2	1	622	69.3	5.35	165	2	2.424	2.009	1.77	0.0204625	0.0356249	0.0552092	58.6	117.7	142	103.7	9.37	3.25	2.56	13.34	High	High	High	High	High	High	High	High
FALSE	High	Master Protein	NP_523378.2	inflated, isoform B [Drosophila melanogaster]	0	64.888	12	18	32	18	1	1396	154.2	6.19	601	18	2.422	1.992	1.558	0.0167214	0.0299229	0.0632331	62	123.5	150.2	96.6	4.67	10.42	4.27	2.14	High	High	High	High	High	High	High	High
FALSE	High	Master Protein	NP_511141.2	Tis11 zinc finger protein, isoform A [Drosophila melanogaster]	0.006	5.882	7	2	2	2	1	436	47.1	7.66	59	2	2.422	2.645	1.523	0.307633	0.292431	0.940736	55.2	146.1	133.8	84.1	36.09	26.65	9.6	26.38	High	High	High	High	High	High	High	High
FALSE	Low	Master Protein	NP_611639.1	CG6613 [Drosophila melanogaster]	0.174	1.028	1	1	1	1	1	720	81	5.52	14	1	2.421	1.982	1.957	0.0650912	0.153952	0.165824	56.2	111.3	136	109.9	10.61	0.3	13.52	18.95	High	High	High	High	High	High	High	High
FALSE	High	Master Protein	NP_651717.1	CG7601 [Drosophila melanogaster]	0	15.586	18	6	9	6	1	326	35.7	9.26	194	6	2.421	1.654	2.011	0.0149001	0.0257568	0.0186798	62.2	102.9	150.6	125	0.03	8.87	2.48	0.26	High	High	High	High	High	High	High	High
FALSE	High	Master Protein	NP_647780.1	girdin, isoform A [Drosophila melanogaster]	0.002	13.045	3	4	4	4	1	1381	157.4	5.48	78	4	2.421	3.695	2.925	0.209851	0.0982798	0.162172	43.5	160.7	105.3	127.3	27.23	37.92	2.14	4.04	High	High	High	High	High	High	High	High
FALSE	High	Master Protein	NP_001260561.1	Asparaginyl-tRNA synthetase, isoform B [Drosophila melanogaster]	0	81.588	28	19	39	19	1	558	63.9	5.96	541	19	2.42	0.977	0.958	0.027711	1	1	77.7	75.9	188.1	74.4	12.39	17.47	0.04	10.85	High	High	High	High	High	High	High	High
FALSE	High	Master Protein	NP_524436.2	Insulin-like receptor, isoform A [Drosophila melanogaster]	0	29.183	4	8	10	8	1	2144	239.6	6.9	181	8	2.418	1.651	1.818	0.168312	0.597487	0.446515	61	100.7	147.4	110.9	12.13	0.12	5.18	11.34	High	High	High	High	High	High	High	High
FALSE	High	Master Protein	NP_611155.3	uncoordinated-104, isoform D [Drosophila melanogaster]	0	40.463	9	14	14	14	1	1739	196.9	6.14	224	14	2.417	2.048	1.887	0.0441895	0.0941933	0.132611	59.2	121.2	143	111.7	6.77	9.21	9.68	1.6	High	High	High	High	High	High	High	High
FALSE	High	Master Protein	NP_001245813.1	galectin, isoform D [Drosophila melanogaster]	0.001	15.432	12	5	10	2	1	401	45.9	6.73	182	5	2.417	2.251	1.837	0.183414	0.263156	0.460486	57.4	129.2	138.7	105.5	24.11	26.07	1.28	1.49	High	High	High	High	High	High	High	High
FALSE	High	Master Protein	NP_001259778.1	uncharacterized protein Dmel_CG17600, isoform D [Drosophila melanogaster]	0.002	14.375	6	5	6	5	1	603	65	9.04	136	5	2.416	3.441	1.321	0.0699787	0.0424743	0.808485	51.2	176.3	123.8	67.7	20	1.47	21.22	24.48	High	High	High	High	High	High	High	High
FALSE	High	Master Protein	NP_732553.2	uncharacterized protein Dmel_CG31195 [Drosophila melanogaster]	0	71.85	19	19	52	19	1	807	94.3	7.44	795	19	2.413	2.12	1.326	0.0218385	0.0373747	0.339093	63.1	133.8	152.4	83.7	7.3	17	4.99	8.18	High	High	High	High	High	High	High	High
FALSE	High	Master Protein	NP_001163678.1	uncharacterized protein Dmel_CG34034 [Drosophila melanogaster]	0.002	14.435	18	2	7	2	1	135	15	7.74	154	2	2.411	9.418	5.602	0.0546565	0.0224811	0.0238917	25.3	238	60.9	141.5	7.42	27.25	2.33	13.02	High	High	High	High	High	High	High	High
FALSE	High	Master Protein	NP_001247215.1	Na/Ca-exchange protein, isoform G [Drosophila melanogaster]	0	93.507	24	21	62	1	1	973	108.9	4.96	1183	21	2.41	2.362	1.872	0.0633135	0.0869114	0.183363	58.4	137.9	140.7	109.3	25.48	8.56	2.58	16.9	High	High	High	High	High	High	High	High
FALSE	High	Master Protein	NP_610232.1	phtf [Drosophila melanogaster]	0.002	13.968	7	4	5	4	1	880	97.6	8.32	127	4	2.41	1.676	2.05	0.0626224		0.131177	59.5	99.6	143.3	121.9	20.02		9.74	14.18	High	High	High	High	High	High	High	High
FALSE	High	Master Protein	NP_723730.2	uncharacterized protein Dmel_CG31760, isoform C [Drosophila melanogaster]	0	25.429	10	8	8	8	1	1093	121.5	7.5	161	8	2.405	1.427	1.725	0.0218385	0.213776	0.0819987	65.8	93.9	158.3	113.5	14.69	2.72	2.39	7.3	High	High	High	High	High	High	High	High
FALSE	High	Master Protein	NP_724279.1	centrocortin, isoform B [Drosophila melanogaster]	0.01	4.817	2	2	2	2	1	790	89.8	5.68	55	2	2.405	2.45	2.102	0.0823393	0.0990884	0.15988	51.8	126.9	124.5	108.8	6.12	23.03	6.13	29.55	High	High	High	High	High	High	High	High
FALSE	High	Master Protein	NP_608562.4	IA-2 protein tyrosine phosphatase, isoform C [Drosophila melanogaster]	0	85.538	24	24	43	24	1	1319	146.8	6.38	1047	24	2.403	2.12	2.476	0.0246682	0.0443581	0.0391428	55.7	118.2	134	138	2.97	4.95	2.26	12.1	High	High	High	High	High	High	High	High
FALSE	High	Master Protein	NP_001163549.1	uncharacterized protein Dmel_CG18249, isoform B [Drosophila melanogaster]	0.002	9.792	6	3	6	3	1	559	62.6	7.66	106	3	2.403	2.54	1.801	0.0218385	0.0283396	0.0611591	56.6	143.6	135.9	101.8	13.76	5.84	7.73	4.28	High	High	High	High	High	High	High	High
FALSE	High	Master Protein	NP_524359.2	centrosomal protein 190kD, isoform A [Drosophila melanogaster]	0	16.31	7	6	6	6	1	1096	121.6	4.67	131	6	2.402	2.703	1.703	0.274055	0.245509	0.725062	52.4	141.6	125.8	89.2	17.68	25.02	23.95	9.86	High	High	High	High	High	High	High	High
FALSE	High	Master Protein	NP_523671.1	protein kinase, cAMP-dependent, regulatory subunit type 2, isoform A [Drosophila melanogaster]	0	91.458	53	17	74	17	1	377	42.7	4.97	1554	17	2.401	2.167	2.092	0.0182017	0.0281212	0.0311135	57.6	124.8	138.2	120.4	0.55	7.48	5.59	10.09	High	High	High	High	High	High	High	High
FALSE	High	Master Protein	NP_001260155.1	Liprin-alpha, isoform E [Drosophila melanogaster]	0	57.365	18	17	18	17	1	1214	136	6.16	281	17	2.399	2.015	2.49	0.0345227	0.0734009	0.0494032	55.5	111.9	133.2	138.3	5.79	16.1	7.91	8.44	High	High	High	High	High	High	High	High
FALSE	High	Master Protein	NP_652606.1	c11.1, isoform A [Drosophila melanogaster]	0	46.017	9	14	19	14	1	1742	193	6.37	406	14	2.397	1.286	1.727	0.213146	1	0.601119	67.6	87	162.1	116.8	2.08	45.89	0.05	24.68	High	High	High	High	High	High	High	High
FALSE	High	Master Protein	NP_001286964.1	down syndrome cell adhesion molecule 2, isoform Q [Drosophila melanogaster]	0	52.046	8	16	21	16	1	1968	216.4	7.83	342	16	2.395	2.119	1.881	0.0728048	0.133261	0.203795	59.5	126	142.4	111.8	6.14	15.01	4.49	12.76	High	High	High	High	High	High	High	High
FALSE	High	Master Protein	NP_001261685.1	simjang, isoform E [Drosophila melanogaster]	0.008	4.904	2	2	3	2	1	937	98	9.66	58	2	2.391	2.323	2.09	0.211977	0.26976	0.352579	54.9	127.6	131.4	114.8	2.84	1.02	18.65	33.33	High	High	High	High	High	High	High	High
FALSE	Low	Master Protein	NP_650915.1	uncharacterized protein Dmel_CG17270, isoform A [Drosophila melanogaster]	0.073	1.919	6	1	1	1	1	169	19.5	9.41	17	1	2.387	2.261	1.74	0.148264	0.207366	0.456707	57.6	130.3	137.6	100.3	3.79	13.6	2.55	3.4	High	High	High	High	High	High	High	High
FALSE	High	Master Protein	NP_729396.2	Z band alternatively spliced PDZ-motif protein 66, isoform F [Drosophila melanogaster]	0	61.018	42	15	31	4	1	402	44.4	8.6	840	15	2.384	3.501	1.422	0.0804517	0.0443581	0.644724	48.4	169.6	115.4	68.8	1.62	8.62	2.45	16.54	High	High	High	High	High	High	High	High
FALSE	High	Master Protein	NP_649694.1	uncharacterized protein Dmel_CG10098 [Drosophila melanogaster]	0	40.249	33	10	18	10	1	353	37.5	4.79	480	10	2.383	2.039	1.876	0.0225584	0.0443581	0.0659225	60.6	123.6	144.5	113.7	6.09	0.96	15.35	8.64	High	High	High	High	High	High	High	High
FALSE	High	Master Protein	NP_648572.1	sodium chloride cotransporter 69, isoform A [Drosophila melanogaster]	0	135.562	28	30	79	1	1	1171	129.1	6.84	1811	30	2.382	1.446	1.681	0.290729	0.995606	0.757938	59.4	85.9	141.5	99.9	18.93	8.07	11.58	8.28	High	High	High	High	High	High	High	High
FALSE	High	Master Protein	NP_649027.1	uncharacterized protein Dmel_CG13698, isoform B [Drosophila melanogaster]	0.005	7.126	5	1	4	1	1	316	33.5	9.64	39	1	2.382	2.492	1.678	0.0275163	0.0356249	0.123066	57.1	142.2	135.9	95.8	8.43	0.85	6.18	17.03	High	High	High	High	High	High	High	High
FALSE	High	Master Protein	NP_610179.2	kune-kune [Drosophila melanogaster]	0.002	14.826	11	3	17	3	1	264	29.8	5.21	227	3	2.38	2.335	1.53	0.184225	0.230947	0.755054	58.1	135.7	138.3	88.9	0.64	7.9	16	22.71	High	High	High	High	High	High	High	High
FALSE	Medium	Master Protein	NP_001263059.1	uncharacterized protein Dmel_CG14509, isoform D [Drosophila melanogaster]	0.017	4.194	3	2	3	2	1	472	52.1	8.7	45	2	2.379	2.004	2.086	0.211371	0.391382	0.348886	58.7	117.7	139.7	122.5	13.68	1.4	1.29	5.6	High	High	High	High	High	High	High	High
FALSE	High	Master Protein	NP_610355.1	nucleoporin 50kD [Drosophila melanogaster]	0.001	15.418	11	5	7	5	1	564	59.4	8.43	139	5	2.377	3.188	3.03	0.179083	0.106742	0.126008	43.3	138	102.9	131.2	2.97	16.39	5.01	7.19	High	High	High	High	High	High	High	High
FALSE	High	Master Protein	NP_787998.1	A kinase anchor protein 200, isoform D [Drosophila melanogaster]	0	341.499	39	43	273	11	1	837	88.1	4.22	6337	43	2.377	9.668	7.878	0.0552065	0.0224811	0.0195785	22.5	218	53.6	177.6	13.99	3.95	4.68	7.53	High	High	High	High	High	High	High	High
FALSE	High	Master Protein	NP_001260570.1	fondue, isoform D [Drosophila melanogaster]	0	72.088	29	11	47	1	1	574	57.6	6.92	1715	11	2.372	1.844	1.875	0.498377	0.850331	0.824224	59.5	109.7	141.2	111.6	41.08	42.02	3.88	6.32	High	High	High	High	High	High	High	High
FALSE	High	Master Protein	NP_524153.1	accessory gland protein 76A, isoform A [Drosophila melanogaster]	0.002	12.311	10	3	5	3	1	388	44.2	8.09	101	3	2.369	2.809	11.507	0.428872	0.345301	0.0585893	26.6	74.8	63.1	306.5	40.58	27.36	1.64	58.49	High	High	High	High	High	High	High	High
FALSE	High	Master Protein	NP_728257.2	lethal (1) G0156, isoform C [Drosophila melanogaster]	0	220.423	62	29	290	1	1	354	38.6	7.36	5824	29	2.367	1.91	6.421	0.219646	0.458197	0.0529779	40.3	77	95.4	258.8	27.69	1	10.91	29.6	High	High	High	High	High	High	High	High
FALSE	High	Master Protein	NP_001036485.1	down syndrome cell adhesion molecule 1, isoform BB [Drosophila melanogaster]	0	58.69	10	18	32	18	1	2020	222.6	6.47	551	18	2.366	2.16	1.685	0.0218385	0.0356249	0.0819987	60.5	130.6	143.1	101.9	7.92	16.12	8.11	5.08	High	High	High	High	High	High	High	High
FALSE	High	Master Protein	NP_650771.1	CG6005, isoform A [Drosophila melanogaster]	0.005	6.828	6	2	2	2	1	324	36.7	8.51	47	2	2.365	1.704	2.107	0.0723447	0.284967	0.139818	61.5	104.7	145.4	129.5	0.98	13.93	6.18	28.55	High	High	High	High	High	High	High	High
FALSE	High	Master Protein	NP_648855.2	CG4950, isoform B [Drosophila melanogaster]	0	21.233	9	4	6	4	1	574	65.1	6.34	224	4	2.365	1.585	1.908	0.0218385	0.0788471	0.0461724	65.7	104.2	155.4	125.4	1.64	11.5	9.09	2.57	High	High	High	High	High	High	High	High
FALSE	High	Master Protein	NP_611143.1	CG5065, isoform A [Drosophila melanogaster]	0	77.7	26	16	50	16	1	625	69.6	9.33	1176	16	2.364	1.978	2.403	0.0300178	0.0654845	0.0469802	57.1	113	135	137.2	8.89	4.09	8.78	17.13	High	High	High	High	High	High	High	High
FALSE	High	Master Protein	NP_523415.1	adaptor protein complex 1/2, beta subunit [Drosophila melanogaster]	0	43.967	15	13	23	13	1	921	101.1	5.11	546	13	2.363	1.539	1.734	0.0989801	0.530505	0.334095	67.3	103.6	159	116.7	8.45	19.47	7.86	17.11	High	High	High	High	High	High	High	High
FALSE	High	Master Protein	NP_650905.2	cuticular protein 92F [Drosophila melanogaster]	0.004	7.675	8	2	4	2	1	381	39.8	7.09	89	2	2.361	3.994	2.029	0.331152	0.13103	0.5313	48.9	195.4	115.5	99.2	16.88	3.62	36.43	6.86	High	High	High	High	High	High	High	High
FALSE	High	Master Protein	NP_477257.2	imaginal disc growth factor 2, isoform A [Drosophila melanogaster]	0	140.482	53	25	70	25	1	440	49.1	6.55	1483	25	2.36	2.135	2.356	0.0149001	0.0224811	0.018086	56	119.6	132.2	132	5.95	1.19	2.29	8.78	High	High	High	High	High	High	High	High
FALSE	High	Master Protein	NP_525064.1	lava lamp, isoform C [Drosophila melanogaster]	0	386.722	41	95	181	95	1	2779	315.7	4.86	4901	95	2.359	2.623	3.165	0.037371	0.0380446	0.0357967	47.6	124.8	112.2	150.5	8.35	14.24	2.09	6.44	High	High	High	High	High	High	High	High
FALSE	High	Master Protein	NP_731596.1	jupiter, isoform A [Drosophila melanogaster]	0	44.767	41	7	24	1	1	197	20.9	9.95	587	7	2.359	2.039	1.67	0.17703	0.315316	0.573172	59.9	122.1	141.2	99.9	6.99	21.68	1.84	14.6	High	High	High	High	High	High	High	High
FALSE	High	Master Protein	NP_001261446.1	still life, isoform J [Drosophila melanogaster]	0	210.658	18	51	140	8	1	2734	303.5	7.94	2695	51	2.358	1.787	2.296	0.137851	0.385905	0.1805	57.2	102.2	134.9	131.3	9.65	9.47	12.14	8.15	High	High	High	High	High	High	High	High
FALSE	High	Master Protein	NP_611666.2	uncharacterized protein Dmel_CG13506, isoform A [Drosophila melanogaster]	0	32.466	20	8	20	8	1	503	57	5.33	479	8	2.357	2.252	1.774	0.0446618	0.0672121	0.156394	59	133	139.2	104.7	1.21	5.29	4.6	13.46	High	High	High	High	High	High	High	High
FALSE	High	Master Protein	NP_609835.2	cytoplasmic linker protein 190, isoform A [Drosophila melanogaster]	0	203.83	36	58	90	58	1	1690	189	4.94	1550	58	2.357	1.775	2.75	0.0912435	0.289893	0.0819987	55.5	98.5	130.8	152.6	12.16	5.61	14.28	19.26	High	High	High	High	High	High	High	High
FALSE	High	Master Protein	NP_609188.4	piezo, isoform J [Drosophila melanogaster]	0	139.713	14	30	79	30	1	2621	297.1	8.44	2109	30	2.356	1.764	1.446	0.063721	0.218161	0.512874	64.9	114.4	152.8	93.8	1.55	3.71	2.58	8.09	High	High	High	High	High	High	High	High
FALSE	High	Master Protein	NP_001259136.1	uncharacterized protein Dmel_CG32809, isoform I [Drosophila melanogaster]	0	66.927	19	18	25	18	1	1249	136.2	9.11	494	18	2.356	2.01	1.85	0.0528073	0.110077	0.154967	58.3	117.1	137.2	107.8	1.5	8.56	7.64	8.72	High	High	High	High	High	High	High	High
FALSE	High	Master Protein	NP_001259193.1	shaggy, isoform Q [Drosophila melanogaster]	0	43.598	8	8	18	2	1	1168	123.7	5.59	416	8	2.354	1.483	2.364	0.305894	0.96372	0.34651	58.7	87	138.2	138.7	23.64	4.8	16.83	0.8	High	High	High	High	High	High	High	High
FALSE	High	Master Protein	NP_610383.1	maltase A7, isoform A [Drosophila melanogaster]	0	92.404	30	17	90	17	1	599	67.2	4.92	1633	17	2.353	3.058	11.157	0.400295	0.266898	0.0554421	26.9	82.4	63.4	300.6	12.29	40.89	3.8	56.09	High	High	High	High	High	High	High	High
FALSE	High	Master Protein	NP_001027401.1	uncharacterized protein Dmel_CG18003 [Drosophila melanogaster]	0	76.21	35	13	108	13	1	366	39.7	8.13	2623	13	2.352	2.063	2.556	0.192457	0.324322	0.184981	57.7	119	135.7	147.5	20.41	4.28	2.08	48.56	High	High	High	High	High	High	High	High
FALSE	High	Master Protein	NP_523802.1	acyl-Coenzyme A oxidase at 57D proximal, isoform A [Drosophila melanogaster]	0	88.45	33	20	62	20	1	677	76	6.92	1169	20	2.352	1.96	2.001	0.176373	0.351988	0.328229	59.6	116.8	140.2	119.2	8.88	14.24	10.01	45.49	High	High	High	High	High	High	High	High
FALSE	High	Master Protein	NP_001261606.1	uncharacterized protein Dmel_CG43783, isoform G [Drosophila melanogaster]	0	38.617	10	10	17	9	1	1248	135.1	6.09	591	10	2.352	2.147	2.337	0.11666	0.184845	0.148081	53.1	113.9	124.9	124.1	27.09	4.56	0.17	33.18	High	High	High	High	High	High	High	High
FALSE	High	Master Protein	NP_723146.1	adenosine 2, isoform B [Drosophila melanogaster]	0	95.35	21	29	43	29	1	1354	148	5.68	690	29	2.352	1.611	1.997	0.019143	0.0526973	0.034933	62.6	100.9	147.4	125.1	6.95	2.96	8.45	4.84	High	High	High	High	High	High	High	High
FALSE	High	Master Protein	NP_611836.2	CG5549 [Drosophila melanogaster]	0	61.726	14	16	30	16	1	1188	122.4	9.5	759	16	2.351	2.143	2.218	0.101026	0.164853	0.151799	55.6	119.1	130.7	123.3	13.65	12.36	4.97	9.84	High	High	High	High	High	High	High	High
FALSE	High	Master Protein	NP_723955.2	uncharacterized protein Dmel_CG42817, isoform A [Drosophila melanogaster]	0	23.955	4	5	12	5	1	1215	140.5	5.21	139	5	2.351	1.907	1.379	0.0158729	0.0280995	0.0938729	65.7	125.3	154.4	90.6	0.36	0.76	2.79	9.97	High	High	High	High	High	High	High	High
FALSE	High	Master Protein	NP_001247091.1	abelson interacting protein, isoform D [Drosophila melanogaster]	0	28.305	22	10	15	10	1	477	52.4	7.08	216	10	2.35	2.149	2.15	0.0348672	0.0558449	0.0646921	56.8	122	133.4	122	0.93	16.11	4.42	11.11	High	High	High	High	High	High	High	High
FALSE	High	Master Protein	NP_788891.2	adaptor protein complex 1, gamma subunit, isoform D [Drosophila melanogaster]	0.005	7.062	2	2	3	2	1	982	106.9	5.68	54	2	2.349	2.083	1.7	0.0770875	0.141338	0.294967	60.8	126.6	142.8	103.3	14.21	11.03	3.22	6.97	High	High	High	High	High	High	High	High
FALSE	Medium	Master Protein	NP_001261224.1	uncharacterized protein Dmel_CG13901, isoform B [Drosophila melanogaster]	0.028	3.33	5	1	1	1	1	222	25.5	7.91	50	1	2.349	1.943	2.202	0.301784	0.547355	0.403599	55.3	107.4	129.8	121.7	18.31	22.79	11.04	51.85	High	High	High	High	High	High	High	High
FALSE	High	Master Protein	NP_001285396.1	vacuolar protein sorting 4, isoform B [Drosophila melanogaster]	0	97.471	40	23	60	23	1	442	49.6	6.96	1078	23	2.349	2.108	1.451	0.0174656	0.0280995	0.094113	63	132.7	147.9	91.4	6.02	8.96	0.44	4.45	High	High	High	High	High	High	High	High
FALSE	High	Master Protein	NP_524330.2	members only [Drosophila melanogaster]	0	15.806	9	5	5	5	1	702	78.6	5.91	69	5	2.348	2.46	2.356	0.144263	0.152944	0.174821	48.4	119	113.6	113.9	24.23	23.15	18.11	8.09	High	High	High	High	High	High	High	High
FALSE	Medium	Master Protein	NP_001285176.1	radish, isoform I [Drosophila melanogaster]	0.019	3.898	1	2	2	2	1	1799	203.6	8.22	31	2	2.348	2.073	2.346	0.280623	0.443418	0.325711	53.5	111	125.7	125.6	9.69	2.12	17.4	1.98	High	High	High	High	High	High	High	High
FALSE	High	Master Protein	NP_725542.1	mrj, isoform B [Drosophila melanogaster]	0.005	6.633	8	3	3	3	1	259	29	9.11	35	3	2.347	2.252	2.584	0.0592782	0.0859996	0.0661633	51.5	115.9	120.9	133.1	16.25	6.51	3.73	7.49	High	High	High	High	High	High	High	High
FALSE	High	Master Protein	NP_996415.1	casein kinase II beta subunit, isoform E [Drosophila melanogaster]	0.003	8.486	8	1	4	1	1	235	27.1	5.33	71	1	2.347	1.742	2.516	0.136126	0.414182	0.143091	56.4	98.3	132.5	142	25.37	24.51	15.52	7.72	High	High	High	High	High	High	High	High
FALSE	High	Master Protein	NP_732383.1	endophilin A, isoform A [Drosophila melanogaster]	0	48.922	24	12	27	12	1	369	41.4	5.54	402	12	2.346	2.098	2.097	0.0149001	0.0224811	0.0195785	58.7	123.1	137.7	123	0.93	2.87	1.27	5.3	High	High	High	High	High	High	High	High
FALSE	High	Master Protein	NP_001246674.1	rhea, isoform B [Drosophila melanogaster]	0	236.006	24	61	114	61	1	2836	306.8	6.21	2412	61	2.345	1.936	1.695	0.0220303	0.0471248	0.0847109	61.3	118.6	143.7	103.8	0.16	13.21	2.91	8.28	High	High	High	High	High	High	High	High
FALSE	Low	Master Protein	NP_729032.1	Rho guanine nucleotide exchange factor at 64C, isoform A [Drosophila melanogaster]	0.069	2.016	1	1	1	1	1	1984	214.8	6.8	0	1	2.344	1.977	1.713	0.141387	0.282566	0.447662	58.2	115.1	136.4	99.7	5.54	37.91	18.23	19.65	High	High	High	High	High	High	High	High
FALSE	Medium	Master Protein	NP_001188920.1	uncharacterized protein Dmel_CG42808 [Drosophila melanogaster]	0.018	4.084	10	2	2	2	1	135	15.8	5.64	22	2	2.343	3.332	1.123	0.0218385	0.0224811	0.940736	55.9	186.3	131	62.8	8.77	9.34	11.27	8.6	High	High	High	High	High	High	High	High
FALSE	High	Master Protein	NP_001163573.1	uncoordinated 115a, isoform B [Drosophila melanogaster]	0	116.416	33	28	89	3	1	844	93.9	8.75	1618	28	2.343	2.372	3.03	0.0658346	0.0821609	0.0568463	50.1	118.9	117.5	151.9	9.12	2.62	2.43	0.1	High	High	High	High	High	High	High	High
FALSE	High	Master Protein	NP_001097420.1	uncharacterized protein Dmel_CG34445 [Drosophila melanogaster]	0.005	6.287	12	2	2	2	1	134	15.5	7.91	42	2	2.342	0.201	0.859	0.15643		1	81.1	16.3	189.9	69.7	36.97		3.21	14.98	High	High	High	High	High	High	High	High
FALSE	High	Master Protein	NP_569970.2	moody, isoform A [Drosophila melanogaster]	0.002	10.662	6	3	6	1	1	670	71.9	9.1	207	3	2.341	1.852	1.528	0.225776	0.502823	0.813329	65.6	121.4	153.5	100.2	10.55	38.76	1.58	13.75	High	High	High	High	High	High	High	High
FALSE	High	Master Protein	NP_725926.1	Odorant-binding protein 56f [Drosophila melanogaster]	0.006	5.587	20	2	2	2	1	125	14.3	8.15	30	2	2.339	4.672	9.999	0.083541	0.0356249	0.0213943	25.8	120.7	60.4	258.3	3.18	13.59	23.87	26.26	High	High	High	High	High	High	High	High
FALSE	High	Master Protein	NP_001260738.1	klaroid, isoform A [Drosophila melanogaster]	0	16.906	5	4	9	4	1	965	109.7	7.15	234	4	2.336	2.563	1.759	0.332024	0.308385	0.722295	51	130.7	119.2	89.7	3.73	11.63	44.92	42.11	High	High	High	High	High	High	High	High
FALSE	High	Master Protein	NP_723463.1	organic anion transporting polypeptide 30B, isoform A [Drosophila melanogaster]	0.002	13.594	4	4	6	4	1	1197	130.1	7.52	182	4	2.334	2.216	1.8	0.220807	0.297768	0.522328	50.6	112.1	118	91	27.13	32.41	9.47	27.88	High	High	High	High	High	High	High	High
FALSE	High	Master Protein	NP_609024.1	uncharacterized protein Dmel_CG42369 [Drosophila melanogaster]	0	26.157	20	7	19	7	1	401	46.8	5.9	546	7	2.333	2.307	1.593	0.0860872	0.111047	0.40898	62.3	143.7	145.3	99.2	1.16	28.3	11.37	18.25	High	High	High	High	High	High	High	High
FALSE	High	Master Protein	NP_524906.1	Male-specific RNA 57Da [Drosophila melanogaster]	0.008	4.844	19	1	3	1	1	75	7.1	8.68	47	1	2.333	4.657	9.843	0.499465	0.166614	0.0711912	26.2	121.9	61	257.5	29.06	70.28	22.47	13.25	High	High	High	High	High	High	High	High
FALSE	High	Master Protein	NP_524033.2	ypsilon schachtel, isoform A [Drosophila melanogaster]	0	156.899	66	24	112	24	1	352	38.2	9.85	2549	24	2.331	2.266	3.009	0.0870093	0.11989	0.0661633	47.6	107.9	111	143.3	11.09	3.24	1.79	1.78	High	High	High	High	High	High	High	High
FALSE	High	Master Protein	NP_001245581.1	neuroglian, isoform G [Drosophila melanogaster]	0	376.983	38	57	282	57	1	1309	145.4	5.55	5586	57	2.331	1.834	1.443	0.0215275	0.0382471	0.126353	65.8	120.6	153.3	94.9	7.8	10.73	7.08	5.79	High	High	High	High	High	High	High	High
FALSE	High	Master Protein	NP_727374.1	imaginal disc growth factor 4, isoform B [Drosophila melanogaster]	0	212.067	56	28	144	26	1	442	48.6	7.83	2972	28	2.33	1.582	2.33	0.271312	0.81617	0.314447	60.9	96.3	141.8	141.8	19.21	24.29	16.6	50.36	High	High	High	High	High	High	High	High
FALSE	High	Master Protein	NP_523976.1	arrestin 2 [Drosophila melanogaster]	0	153.371	52	25	148	25	1	401	45	8.6	2083	25	2.329	0.949	0.626	0.0514322	1	0.267775	84.8	80.5	197.5	53.1	15.65	22.15	6.34	4.99	High	High	High	High	High	High	High	High
FALSE	High	Master Protein	NP_523401.2	transferrin 1, isoform A [Drosophila melanogaster]	0	165.835	46	33	110	33	1	641	71.8	7.06	2373	33	2.329	1.735	2.042	0.0197339	0.0424059	0.034933	60.5	105	140.9	123.5	6.88	10.53	0.76	10.93	High	High	High	High	High	High	High	High
FALSE	High	Master Protein	NP_572408.2	uncharacterized protein Dmel_CG10920 [Drosophila melanogaster]	0	16.279	9	3	6	3	1	397	44.7	9.38	177	3	2.329	2.527	7.907	0.109868	0.107305	0.026595	33.3	84.2	77.6	263.5	3.38	22.58	13.84	17.4	High	High	High	High	High	High	High	High
FALSE	High	Master Protein	NP_001285159.1	secretory 16, isoform J [Drosophila melanogaster]	0	51.875	7	14	27	14	1	2242	244.7	5.81	608	14	2.329	2.505	1.994	0.074387	0.0794599	0.159601	54.6	136.8	127.2	108.9	0.8	23.23	9.76	18.44	High	High	High	High	High	High	High	High
FALSE	High	Master Protein	NP_524406.1	ora transientless [Drosophila melanogaster]	0.002	11.827	9	2	7	2	1	485	55.5	7.8	164	2	2.328	1.771	1.347	0.35582	0.731944	1	69.8	123.7	162.6	94	24.95	12.89	5.93	22.23	High	High	High	High	High	High	High	High
FALSE	Medium	Master Protein	NP_001286115.1	E2F transcription factor 2, isoform B [Drosophila melanogaster]	0.018	4.101	5	2	2	2	1	370	41.4	5.21	20	2	2.328	1.875	1.665	0.131881	0.309632	0.460684	58.6	109.9	136.5	97.6	2.32	30.74	3.68	13.28	High	High	High	High	High	High	High	High
FALSE	High	Master Protein	NP_524816.1	larval serum protein 2, isoform A [Drosophila melanogaster]	0	81.787	25	18	45	18	1	701	83.3	6.35	486	18	2.326	1.122	2.596	0.243325	1	0.21726	64.5	72.4	150	167.5	11.62	34.51	18.82	16.9	High	High	High	High	High	High	High	High
FALSE	High	Master Protein	NP_524826.1	Tryptophanyl-tRNA synthetase [Drosophila melanogaster]	0	47.934	33	14	26	14	1	430	47.9	6.86	439	14	2.325	1.439	1.75	0.0870256	0.619594	0.282607	67.1	96.5	156	117.4	2.82	20.43	14.01	20.34	High	High	High	High	High	High	High	High
FALSE	High	Master Protein	NP_001163278.2	phosphodiesterase 8, isoform N [Drosophila melanogaster]	0	20.425	9	8	8	2	1	949	105.8	6.81	87	8	2.323	1.488	1.143	0.248504	0.888428	1	72.9	108.5	169.3	83.3	12.75	27.69	14.45	30.62	High	High	High	High	High	High	High	High
FALSE	High	Master Protein	NP_650494.2	alpha-Mannosidase class II b, isoform A [Drosophila melanogaster]	0	31.959	8	9	13	9	1	1249	141.8	6.76	201	9	2.32	1.933	3.422	0.0465046	0.107742	0.0369737	51.5	99.5	119.5	176.2	5.21	2.54	3.94	0.07	High	High	High	High	High	High	High	High
FALSE	High	Master Protein	NP_524049.1	kinesin light chain, isoform A [Drosophila melanogaster]	0	56.77	28	16	27	16	1	508	58	6.25	626	16	2.319	2.255	1.597	0.0167214	0.0224811	0.0540599	61.4	138.5	142.4	98	2.13	4.45	0.73	13.19	High	High	High	High	High	High	High	High
FALSE	High	Master Protein	NP_651188.1	eukaryotic translation initiation factor 4G2, isoform A [Drosophila melanogaster]	0	32.233	5	9	14	8	1	2072	226.5	8.02	307	9	2.318	2.555	3.835	0.0464607	0.0469186	0.0316759	46.1	117.9	106.9	176.9	15.19	3.16	7.39	8.69	High	High	High	High	High	High	High	High
FALSE	Low	Master Protein	NP_001246115.1	uncharacterized protein Dmel_CG14401, isoform B [Drosophila melanogaster]	0.113	1.371	6	1	1	1	1	198	21.3	4.77	28	1	2.317	2.756	2.838	0.0442165	0.0414344	0.0481647	54.1	149	125.3	153.4	5.45	17.48	12.63	3.92	High	High	High	High	High	High	High	High
FALSE	High	Master Protein	NP_001014611.1	bocksbeutel, isoform B [Drosophila melanogaster]	0	31.824	22	8	24	8	1	399	44.2	9.23	613	8	2.316	2.487	1.951	0.197441	0.19345	0.372666	53.4	132.7	123.6	104.1	12.07	30.9	10.98	17.71	High	High	High	High	High	High	High	High
FALSE	High	Master Protein	NP_610562.1	mulet, isoform A [Drosophila melanogaster]	0	22.247	15	7	7	7	1	459	53.1	5.45	126	7	2.315	2.774	1.762	0.0834442	0.0672391	0.264081	54.9	152.3	127.1	96.7	1.93	10.68	14.72	9.38	High	High	High	High	High	High	High	High
FALSE	High	Master Protein	NP_572421.1	snazarus, isoform A [Drosophila melanogaster]	0.002	9.85	4	5	5	5	1	1117	125.1	7.3	35	5	2.313	1.736	1.873	0.0734853	0.255209	0.190876	62.4	108.3	144.3	116.9	8.69	22.21	0.82	3.78	High	High	High	High	High	High	High	High
FALSE	High	Master Protein	NP_733326.1	uncharacterized protein Dmel_CG31038, isoform A [Drosophila melanogaster]	0.006	5.423	3	2	2	2	1	730	77.9	6.52	58	2	2.312	2.297	2.154	0.118052	0.145227	0.178641	54	124	124.8	116.3	2	26.91	4.24	4.15	High	High	High	High	High	High	High	High
FALSE	High	Master Protein	NP_610726.1	jelly belly, isoform A [Drosophila melanogaster]	0	20.635	12	6	10	6	1	560	61.4	6.35	247	6	2.311	2.177	2.663	0.0965562	0.142897	0.0880402	53.3	116.1	123.3	142	14.36	13.35	4.14	4.36	High	High	High	High	High	High	High	High
FALSE	High	Master Protein	NP_523842.2	beta-Tubulin at 60D, isoform A [Drosophila melanogaster]	0	118.435	27	13	249	1	1	454	50.8	4.88	5649	13	2.31	2.17	1.693	0.0779809	0.120887	0.290634	59.9	130	138.4	101.5	30.01	9.63	1.69	3.16	High	High	High	High	High	High	High	High
FALSE	High	Master Protein	NP_523949.2	phosphoribosylamidotransferase 2, isoform B [Drosophila melanogaster]	0	53.091	28	15	28	12	1	547	59.4	6.89	557	15	2.306	1.488	2.174	0.0167214	0.0558449	0.0237332	63.2	94.1	145.8	137.4	3.9	11.83	6.05	1.65	High	High	High	High	High	High	High	High
FALSE	High	Master Protein	NP_001285150.1	mucin 11A [Drosophila melanogaster]	0.004	7.42	1	1	2	1	1	1552	142.8	4.17	90	1	2.304	3.05	1.599	0.118888	0.0738159	0.484537	54.2	165.3	124.9	86.6	29.15	3.24	6.01	16.46	High	High	High	High	High	High	High	High
FALSE	High	Master Protein	NP_723014.1	tank, isoform B [Drosophila melanogaster]	0	21.647	12	8	17	8	1	497	56.8	9.63	413	8	2.304	1.649	2.096	0.0463527	0.201939	0.0847109	62.4	102.9	143.7	130.7	11.79	6.91	3.69	16.59	High	High	High	High	High	High	High	High
FALSE	Low	Master Protein	NP_001162639.2	sarcoglycan delta, isoform E [Drosophila melanogaster]	0.118	1.326	2	1	1	1	1	404	42.6	9.48	23	1	2.304	1.723	2.149	0.0981081	0.322219	0.154199	59.7	102.9	137.6	128.4	28.1	20.12	13.82	7.63	High	High	High	High	High	High	High	High
FALSE	High	Master Protein	NP_001247109.1	bitesize, isoform I [Drosophila melanogaster]	0.008	4.889	1	2	2	1	1	3734	404.9	5.92	61	2	2.304	2.075	1.946	0.131776	0.217423	0.266362	59.6	123.6	137.2	115.9	20.04	1.14	13.3	16.1	High	High	High	High	High	High	High	High
FALSE	High	Master Protein	NP_001260984.1	atypical protein kinase C, isoform J [Drosophila melanogaster]	0.002	9.048	4	3	3	3	1	958	104.9	6.86	73	3	2.301	1.928	1.782	0.178644	0.354878	0.447662	60	115.7	138.1	106.9	15.65	30.01	10.87	34.43	High	High	High	High	High	High	High	High
FALSE	High	Master Protein	NP_611051.2	CG8207 [Drosophila melanogaster]	0.002	11.254	6	2	5	2	1	438	48.1	7.72	94	2	2.3	1.696	1.586	0.0913451	0.322913	0.421573	66.4	112.5	152.7	105.3	3.65	33.46	16.88	9.17	High	High	High	High	High	High	High	High
FALSE	Medium	Master Protein	NP_001259114.1	CG3711, isoform D [Drosophila melanogaster]	0.038	2.762	1	2	2	2	1	998	108.9	8.05	0	2	2.296	1.132	1.69	0.659335	1	1	64.9	73.5	149.1	109.7	38.83	29.35	4.88	63.72	High	High	High	High	High	High	High	High
FALSE	High	Master Protein	NP_001262783.1	syncrip, isoform Q [Drosophila melanogaster]	0	68.535	19	13	29	1	1	761	83	8.79	598	13	2.295	2.16	4.203	0.11666	0.168493	0.0494032	46.4	100.3	106.6	195.2	8.46	31.56	19.09	15.12	High	High	High	High	High	High	High	High
FALSE	High	Master Protein	NP_001260019.1	turtle, isoform H [Drosophila melanogaster]	0	41.613	7	9	21	9	1	1533	171	8.97	651	9	2.295	1.956	1.813	0.0345727	0.072807	0.100045	60.9	119.1	139.8	110.4	1.16	4.05	3.99	1.97	High	High	High	High	High	High	High	High
FALSE	Medium	Master Protein	NP_477115.1	adult cuticle protein 1 [Drosophila melanogaster]	0.011	4.617	20	1	2	1	1	135	13.1	9.72	149	1	2.293	1.893	1.797	0.399014	0.677038	0.747515	59.5	112.6	136.4	106.9	40.57	28.6	7.79	18.77	High	High	High	High	High	High	High	High
FALSE	Medium	Master Protein	NP_001097414.1	Liprin-gamma, isoform C [Drosophila melanogaster]	0.028	3.363	1	1	1	1	1	1152	123	8.24	46	1	2.293	2.182	2.148	0.511621	0.625146	0.639783	59.1	129	135.6	127	21.69	13.94	6.62	3.27	High	High	High	High	High	High	High	High
FALSE	High	Master Protein	NP_651875.1	CG1774, isoform A [Drosophila melanogaster]	0.003	8.688	8	2	2	2	1	472	54	9.25	45	2	2.292	4.101	4.218	0.605695	0.264022	0.250886	40	164.2	91.8	168.9	41.33	76.13	10.3	8.16	High	High	High	High	High	High	High	High
FALSE	High	Master Protein	NP_610761.2	gartenzwerg, isoform B [Drosophila melanogaster]	0	31.349	5	9	14	9	1	1983	220.5	5.4	355	9	2.291	2.399	2.598	0.0808185	0.0915068	0.0812511	53.3	127.9	122.2	138.5	4.6	19.49	24.08	10.3	High	High	High	High	High	High	High	High
FALSE	High	Master Protein	NP_524001.2	astray [Drosophila melanogaster]	0.002	10.479	11	4	6	4	1	270	29.2	6.09	96	4	2.291	1.691	1.606	0.0714601	0.268697	0.330226	68.4	115.6	156.7	109.8	6.14	19.36	2.2	11.15	High	High	High	High	High	High	High	High
FALSE	High	Master Protein	NP_001286894.1	uncharacterized protein Dmel_CG13907, isoform B [Drosophila melanogaster]	0	93.511	24	15	75	15	1	816	88	5.38	2168	15	2.291	2.443	1.854	0.108589	0.109685	0.262441	55.2	134.9	126.5	102.4	6.47	11.41	2.72	20.07	High	High	High	High	High	High	High	High
FALSE	Medium	Master Protein	NP_609612.2	uncharacterized protein Dmel_CG16972 [Drosophila melanogaster]	0.038	2.772	1	1	1	1	1	1710	191	5.55	38	1	2.29	2.411	5.999				41.5	100	95	248.7		1.69	13.25	18.72	High	Not Found	High	High	High	High	High	High
FALSE	Medium	Master Protein	NP_476804.1	gamma-Tubulin at 23C [Drosophila melanogaster]	0.017	4.132	3	2	2	2	1	475	53.3	5.94	37	2	2.29	1.509	1.551	0.0325112	0.20908	0.182178	67.5	101.9	154.6	104.8	1.16	12.78	6.2	19.52	High	High	High	High	High	High	High	High
FALSE	High	Master Protein	NP_524987.1	sulfated, isoform A [Drosophila melanogaster]	0.004	7.561	3	3	3	3	1	1114	127.2	8.51	92	3	2.29	1.989	1.504	0.368599	0.571475	0.967034	63.3	125.9	145	95.2	11.53	3.24	21.13	51.35	High	High	High	High	High	High	High	High
FALSE	Medium	Master Protein	NP_001247163.1	Rab3 interacting molecule, isoform F [Drosophila melanogaster]	0.01	4.675	1	2	2	2	1	2798	299.4	8.32	0	2	2.289	2.091	3.127	0.395365	0.545452	0.232312	52.3	109.3	119.7	163.5	9.31	33.95	6.63	30.87	High	High	High	High	High	High	High	High
FALSE	High	Master Protein	NP_001260333.1	Cullin-associated and neddylation-dissociated 1, isoform B [Drosophila melanogaster]	0	43.498	12	14	22	14	1	1248	139.3	5.87	349	14	2.289	1.846	1.736	0.0327789	0.0827852	0.112778	63.9	117.9	146.2	110.9	2.64	23.95	4.71	6.96	High	High	High	High	High	High	High	High
FALSE	High	Master Protein	NP_649255.1	uncharacterized protein Dmel_CG11396 [Drosophila melanogaster]	0.006	5.555	6	2	2	2	1	484	54.6	6.8	33	2	2.288	2.374	2.402	0.392358	0.408725	0.398122	52.8	125.3	120.8	126.8	30.74	21.27	14.78	13.12	High	High	High	High	High	High	High	High
FALSE	High	Master Protein	NP_001246632.1	axotactin, isoform D [Drosophila melanogaster]	0	133.288	16	28	68	1	1	2070	229	5.69	1681	28	2.288	2.361	2.711	0.0609045	0.0733271	0.0600275	50.3	118.7	115.1	136.3	2.16	17.53	14.81	24.51	High	High	High	High	High	High	High	High
FALSE	High	Master Protein	NP_650706.1	CG7131 [Drosophila melanogaster]	0.01	4.832	4	2	2	2	1	494	54.9	8.72	32	2	2.288	2.133	4.872	0.188217	0.266269	0.0661633	45.2	96.5	103.5	220.4	20.85	19.36	9.26	30.87	High	High	High	High	High	High	High	High
FALSE	High	Master Protein	NP_733222.1	Mig-2-like, isoform A [Drosophila melanogaster]	0.002	9.682	11	2	9	2	1	195	21.9	7.91	72	2	2.287	1.936	1.904	0.0435861	0.0960354	0.108412	60.2	116.5	137.7	114.6	7.28	1.78	0.9	2.28	High	High	High	High	High	High	High	High
FALSE	High	Master Protein	NP_001246890.1	neuromusculin, isoform E [Drosophila melanogaster]	0	81.73	8	17	44	17	1	2192	244.4	6.76	662	17	2.287	1.7	1.134	0.0218385	0.0743885	0.942976	70.6	120	161.3	80	0.18	15.24	1.66	0.23	High	High	High	High	High	High	High	High
FALSE	High	Master Protein	NP_650795.2	uncoordinated 79, isoform C [Drosophila melanogaster]	0.002	13.912	2	5	6	5	1	3028	333.5	6.73	115	5	2.286	1.608	2.109	0.0218385	0.0916253	0.0437391	63.5	102.1	145.1	133.9	3.12	2.99	2.78	8.74	High	High	High	High	High	High	High	High
FALSE	High	Master Protein	NP_001036715.1	myosin heavy chain-like, isoform G [Drosophila melanogaster]	0	103.823	15	30	54	4	1	2160	241.5	6.64	1205	30	2.286	2.251	1.946	0.191623	0.238278	0.355275	55.3	124.4	126.3	107.5	16.5	6.37	6.09	17.19	High	High	High	High	High	High	High	High
FALSE	High	Master Protein	NP_001097569.1	nudE, isoform C [Drosophila melanogaster]	0.006	6.015	6	2	2	2	1	377	42.6	5.39	63	2	2.286	1.892	2.854	0.303767	0.556565	0.209551	54	102.2	123.5	154.2	12.66	1.03	21.36	45.52	High	High	High	High	High	High	High	High
FALSE	Medium	Master Protein	NP_001097784.1	CCHamide-1 [Drosophila melanogaster]	0.024	3.436	5	1	2	1	1	182	20.5	6.92	74	1	2.285	2.283	2.867	0.551123	0.613989	0.407478	52.4	119.6	119.7	150.2	49.86	24.31	8.8	10.59	High	High	High	High	High	High	High	High
FALSE	High	Master Protein	NP_609646.1	loquacious, isoform B [Drosophila melanogaster]	0.002	10.058	9	4	5	4	1	465	50.1	8.87	92	4	2.285	2.047	3.268	0.0445404	0.0820731	0.0369737	52	106.4	118.8	169.9	10.37	17.4	8.88	9.34	High	High	High	High	High	High	High	High
FALSE	High	Master Protein	NP_650433.1	uncharacterized protein Dmel_CG31344 [Drosophila melanogaster]	0	16.59	6	2	6	2	1	403	46.4	8.73	174	2	2.284	2.027	2.181	0.0385516	0.0718928	0.0644306	60	121.6	137	130.8	0.77	0.48	8.47	14.18	High	High	High	High	High	High	High	High
FALSE	High	Master Protein	NP_524875.1	arginase [Drosophila melanogaster]	0	48.65	31	11	19	11	1	351	39.1	7.2	461	11	2.284	2.587	2.526	0.0156152	0.0224811	0.0186798	53.9	139.5	123.2	136.3	1.36	9.07	6.11	2.79	High	High	High	High	High	High	High	High
FALSE	High	Master Protein	NP_001259946.1	dynamin related protein 1, isoform B [Drosophila melanogaster]	0	70.228	26	18	43	18	1	735	82.5	6.98	1051	18	2.282	2.081	1.812	0.0386046	0.0655358	0.113133	60.6	126.1	138.3	109.8	1.99	22.81	4.58	11.94	High	High	High	High	High	High	High	High
FALSE	High	Master Protein	NP_001261287.1	alpha spectrin, isoform C [Drosophila melanogaster]	0	1604.89	71	240	1199	240	1	2447	281.1	5.2	27410	240	2.281	1.915	2.021	0.0225584	0.049002	0.0513851	60.3	115.5	137.5	121.9	12.64	12.11	0.92	8.85	High	High	High	High	High	High	High	High
FALSE	Medium	Master Protein	NP_001097207.1	uncharacterized protein Dmel_CG11112 [Drosophila melanogaster]	0.044	2.512	8	2	2	2	1	197	22.2	9.45	24	2	2.279	2.172	10.35	0.380752	0.486113	0.0513851	29.5	64.1	67.3	305.5	4.98	12.01	10.84	47.42	High	High	High	High	High	High	High	High
FALSE	High	Master Protein	NP_729086.1	DnaJ-like-1, isoform B [Drosophila melanogaster]	0	69.517	47	19	32	19	1	334	37	8.85	250	19	2.279	2.034	3.11	0.0582003	0.106174	0.0469802	51.6	105	117.7	160.6	8.11	2.66	1.85	5.69	High	High	High	High	High	High	High	High
FALSE	Medium	Master Protein	NP_476952.1	Microtubule-associated protein 60 [Drosophila melanogaster]	0.036	2.897	5	1	1	1	1	440	47.6	6.77	0	1	2.277	2.023	1.94	0.802602	0.971994	0.995951	57	115.3	129.8	110.6	27.51	22.75	32.7	29.35	High	High	High	High	High	High	High	High
FALSE	High	Master Protein	NP_001262895.1	mitochondrial Rho, isoform F [Drosophila melanogaster]	0	17.431	9	5	8	5	1	673	76.4	6.21	180	5	2.276	2.082	2.997	0.0563661	0.0957547	0.0480433	50.7	105.6	115.4	152	6.58	19.95	18.44	4.48	High	High	High	High	High	High	High	High
FALSE	High	Master Protein	NP_001262788.1	CG5621, isoform C [Drosophila melanogaster]	0.002	11.626	4	3	6	3	1	907	101.4	5.02	140	3	2.275	2.632	1.888	0.226089	0.183339	0.442173	56.3	148.1	128	106.2	39.28	17.58	23.77	15.65	High	High	High	High	High	High	High	High
FALSE	High	Master Protein	NP_610424.1	CG8243 [Drosophila melanogaster]	0.002	13.49	5	3	5	3	1	517	55	8.82	81	3	2.275	2.064	1.94	0.10888	0.179418	0.219842	58.8	121.3	133.7	114	6.69	0.36	9.94	3.12	High	High	High	High	High	High	High	High
FALSE	High	Master Protein	NP_726720.3	CG3638, isoform G [Drosophila melanogaster]	0	94.98	15	22	61	22	1	1472	162	9.07	1296	22	2.274	1.738	1.905	0.0398273	0.12944	0.0944511	61.3	106.5	139.4	116.8	1.39	3.11	9.54	1.49	High	High	High	High	High	High	High	High
FALSE	High	Master Protein	NP_728202.1	bangles and beads, isoform B [Drosophila melanogaster]	0	356.635	84	44	216	44	1	442	45.8	4.63	4923	44	2.274	2.522	1.721	0.49652	0.45621	0.891753	57.3	144.6	130.4	98.7	16.64	52.3	8.37	30.31	High	High	High	High	High	High	High	High
FALSE	High	Master Protein	NP_001286252.1	Not1, isoform H [Drosophila melanogaster]	0	22.017	4	7	10	7	1	2511	281.5	6.74	168	7	2.273	2.058	2.093	0.0848384	0.145095	0.144421	58.6	120.5	133.2	122.6	3.2	13.64	15.26	27.95	High	High	High	High	High	High	High	High
FALSE	High	Master Protein	NP_001285330.1	RNA-binding protein 2, isoform D [Drosophila melanogaster]	0	78.242	44	18	51	18	1	388	41.7	9.79	998	18	2.272	2.052	1.526	0.135145	0.22253	0.606873	61.6	126.4	139.9	93.9	1.65	18.52	4.42	12.92	High	High	High	High	High	High	High	High
FALSE	High	Master Protein	NP_647715.2	CG1317, isoform B [Drosophila melanogaster]	0.003	8.409	4	2	3	2	1	988	111	5.38	73	2	2.271	1.833	1.894	0.091878	0.23678	0.208202	59.4	108.9	134.9	112.5	18.82	31.48	0.24	4.2	High	High	High	High	High	High	High	High
FALSE	High	Master Protein	NP_001246230.1	bruchpilot, isoform L [Drosophila melanogaster]	0	728.459	64	165	581	1	1	1781	206.1	6.33	8527	165	2.27	1.771	2.723	0.139856	0.372747	0.112037	54	95.6	122.6	147	22.18	10.22	18.54	13.06	High	High	High	High	High	High	High	High
FALSE	High	Master Protein	NP_524479.1	organic cation transporter, isoform A [Drosophila melanogaster]	0	27.732	9	5	11	5	1	548	61	5.83	302	5	2.27	0.681	1.166	0.428743	1	1	81.9	55.8	186	95.6	12.77	28.88	26.57	18.99	High	High	High	High	High	High	High	High
FALSE	High	Master Protein	NP_651889.3	salty dog, isoform B [Drosophila melanogaster]	0	15.947	7	5	6	4	1	622	68.2	7.23	98	5	2.27	1.413	1.857	0.0349012	0.322423	0.0893427	65.8	93	149.4	122.2	0.75	1.56	12.51	22.64	High	High	High	High	High	High	High	High
FALSE	High	Master Protein	NP_609979.2	uncharacterized protein Dmel_CG10132, isoform A [Drosophila melanogaster]	0	55.902	12	15	36	15	1	1361	152.3	6.04	708	15	2.27	1.633	1.795	0.0577721	0.249927	0.170194	65.8	107.4	149.3	118.1	11.96	26.26	1.49	10.24	High	High	High	High	High	High	High	High
FALSE	High	Master Protein	NP_611413.2	uncharacterized protein Dmel_CG11961, isoform B [Drosophila melanogaster]	0	72.644	22	19	44	2	1	867	98.2	8.82	691	19	2.268	3.345	2.943	0.591578	0.341319	0.423346	47.1	157.5	106.8	138.5	6.7	17.86	9.94	53.63	High	High	High	High	High	High	High	High
FALSE	High	Master Protein	NP_001286038.1	fasciclin 3, isoform G [Drosophila melanogaster]	0	78.758	26	11	77	3	1	557	60.6	5.2	1718	11	2.267	2.569	1.542	0.074789	0.069877	0.399747	59.1	151.7	133.9	91.1	14.55	12.44	7.34	19.5	High	High	High	High	High	High	High	High
FALSE	High	Master Protein	NP_001263138.1	spn-F, isoform B [Drosophila melanogaster]	0.002	9.764	13	4	4	4	1	376	42.3	5.38	58	4	2.265	1.894	1.583	0.711579	0.956565	1	55.3	104.7	125.3	87.6	5.03	46.57	64.16	20.03	High	High	High	High	High	High	High	High
FALSE	High	Master Protein	NP_609369.1	CG5604 [Drosophila melanogaster]	0.002	15.289	2	4	5	4	1	2727	302	5.43	136	4	2.264	1.691	1.616	0.0431526	0.156532	0.195894	65.6	110.9	148.5	106	16.55	20.99	9.54	3.57	High	High	High	High	High	High	High	High
FALSE	High	Master Protein	NP_001137851.1	Na[+]/H[+] hydrogen exchanger 2, isoform G [Drosophila melanogaster]	0.002	10.554	4	3	4	3	1	1322	146	7.44	59	3	2.264	1.577	1.811	0.432233	0.956467	0.761316	61.1	96.4	138.4	110.7	45.53	23	10.67	52.61	High	High	High	High	High	High	High	High
FALSE	High	Master Protein	NP_572237.1	uncharacterized protein Dmel_CG42492, isoform A [Drosophila melanogaster]	0	164.758	18	21	221	6	1	916	99.3	8.15	5404	21	2.264	1.783	1.77	0.0609045	0.176692	0.183363	63.6	113.4	144	112.5	8.62	10.13	1.34	0.53	High	High	High	High	High	High	High	High
FALSE	High	Master Protein	NP_651250.2	Golgin-84 [Drosophila melanogaster]	0	52.696	28	14	27	14	1	516	58.6	6.87	463	14	2.263	2.509	2.878	0.139265	0.128128	0.0951881	47.4	118.9	107.2	136.4	9.45	5.52	6.58	4.99	High	High	High	High	High	High	High	High
FALSE	High	Master Protein	NP_001262211.1	tenascin major, isoform E [Drosophila melanogaster]	0	38.091	5	14	18	14	1	3349	371.8	5.92	253	14	2.263	2.224	1.839	0.0218385	0.0356249	0.0584443	59.8	133	135.3	110	1.54	3.26	4.59	11.32	High	High	High	High	High	High	High	High
FALSE	Medium	Master Protein	NP_001303491.1	CCR4-NOT transcription complex subunit 10, isoform B [Drosophila melanogaster]	0.031	3.197	2	1	1	1	1	635	69.6	6.49	24	1	2.26	1.604	2.07	0.176573	0.599585	0.270005	60.4	96.8	136.5	124.9	26.47	25.8	3.38	4.04	High	High	High	High	High	High	High	High
FALSE	High	Master Protein	NP_001260058.1	CG3036, isoform B [Drosophila melanogaster]	0	39.564	7	6	25	6	1	493	53.9	8.66	502	6	2.259	1.331	1.012	0.022162	0.303515	1	76.5	101.8	172.8	77.4	0.98	8.06	2.36	13.28	High	High	High	High	High	High	High	High
FALSE	High	Master Protein	NP_729833.1	uncharacterized protein Dmel_CG42709, isoform B [Drosophila melanogaster]	0	20.121	14	5	10	5	1	458	50.5	5.27	178	5	2.257	1.952	2.021	0.211979	0.37627	0.337816	60	117.1	135.4	121.3	4.03	17.16	4.52	10.07	High	High	High	High	High	High	High	High
FALSE	High	Master Protein	NP_001033943.2	NAT1, isoform D [Drosophila melanogaster]	0	84.989	22	26	41	26	1	1488	162.8	8.53	742	26	2.254	2.25	1.953	0.0699787	0.0916253	0.147172	55.6	125.1	125.3	108.6	1.82	13.37	7.4	3.25	High	High	High	High	High	High	High	High
FALSE	High	Master Protein	NP_001285802.1	CG5390, isoform B [Drosophila melanogaster]	0	33.711	17	9	18	9	1	406	44.8	5.52	468	9	2.253	3.55	1.186	0.0167214	0.0224811	0.376443	55.3	196.2	124.5	65.5	1.52	4.38	6.74	8.4	High	High	High	High	High	High	High	High
FALSE	High	Master Protein	NP_723827.1	uncharacterized protein Dmel_CG18507, isoform A [Drosophila melanogaster]	0	15.695	10	4	9	4	1	514	56.1	7.27	144	4	2.252	2.448	2.001	0.0701239	0.0733271	0.1401	55.8	136.5	125.6	111.6	4.83	7.91	2.95	14.3	High	High	High	High	High	High	High	High
FALSE	High	Master Protein	NP_001097238.1	DNA fragmentation factor-related protein 2, isoform B [Drosophila melanogaster]	0	53.162	21	13	36	13	1	549	57.8	5.57	843	13	2.252	2.221	1.889	0.0575956	0.0788471	0.1401	58.5	129.9	131.7	110.5	4.94	18.8	20.05	12.11	High	High	High	High	High	High	High	High
FALSE	High	Master Protein	NP_573176.1	density regulated protein, isoform A [Drosophila melanogaster]	0	20.572	16	3	9	3	1	189	21.3	5.14	218	3	2.251	1.334	1.19	0.239556	1	1	73.9	98.6	166.4	88	1.08	32.28	7.86	8.07	High	High	High	High	High	High	High	High
FALSE	Medium	Master Protein	NP_608902.1	senju [Drosophila melanogaster]	0.013	4.342	3	1	2	1	1	388	43.6	6.35	39	1	2.251	2.081	3.306	0.0192319	0.0283396	0.018086	51.5	107.2	115.9	170.3	8.39	4.4	3.95	9.37	High	High	High	High	High	High	High	High
FALSE	High	Master Protein	NP_650104.2	CG6834 [Drosophila melanogaster]	0	24.907	5	6	9	6	1	895	102.2	5.62	153	6	2.251	1.379	2.683	0.0420413	0.433849	0.0460499	60.5	83.4	136.1	162.2	10.52	3.15	0.22	16.91	High	High	High	High	High	High	High	High
FALSE	High	Master Protein	NP_649461.2	contactin [Drosophila melanogaster]	0	216.365	34	43	156	43	1	1390	158.1	6.79	3605	43	2.25	1.903	1.312	0.0212844	0.0356249	0.215102	65.5	124.7	147.5	86	2.68	10.94	7.41	10.07	High	High	High	High	High	High	High	High
FALSE	High	Master Protein	NP_001097685.2	Chondrocyte-derived ezrin-like domain containing protein, isoform G [Drosophila melanogaster]	0	190.796	14	60	92	54	1	4273	473.2	6.25	1589	60	2.249	1.913	2.146	0.173752	0.334554	0.234862	57.5	110	129.4	123.4	3.12	11.97	11.28	2.19	High	High	High	High	High	High	High	High
FALSE	High	Master Protein	NP_001163513.1	CG2082, isoform G [Drosophila melanogaster]	0	43.69	26	9	23	9	1	368	40	8.38	756	9	2.249	1.561	1.539	0.0218385	0.0890407	0.100573	68.6	107	154.2	105.5	3.6	16.68	6.96	4.87	High	High	High	High	High	High	High	High
FALSE	High	Master Protein	NP_523581.1	heixuedian [Drosophila melanogaster]	0.002	12.962	8	3	8	3	1	359	39.2	8.51	330	3	2.248	2.344	2.766	0.0722268	0.0826402	0.0628258	52	121.8	116.9	143.8	17.41	4.67	2.63	20.01	High	High	High	High	High	High	High	High
FALSE	High	Master Protein	NP_650743.1	CG7708, isoform A [Drosophila melanogaster]	0	26.921	12	6	15	6	1	614	66.8	5.4	447	6	2.248	2.672	2.404	0.137851	0.104467	0.143896	51.8	138.5	116.5	124.6	16.42	11.09	18.5	8.96	High	High	High	High	High	High	High	High
FALSE	High	Master Protein	NP_651114.1	uncharacterized protein Dmel_CG17121 [Drosophila melanogaster]	0	45.893	29	11	29	11	1	361	39.4	9.1	746	11	2.247	2.131	1.6	0.0149001	0.0224811	0.026595	61.6	131.2	138.4	98.5	2.07	5.93	0.58	4.82	High	High	High	High	High	High	High	High
FALSE	High	Master Protein	NP_523749.2	cytochrome P450-6a8 [Drosophila melanogaster]	0	51.272	32	15	24	13	1	506	58.1	8.66	464	15	2.247	3.01	9.424	0.0477327	0.0356249	0.018086	30.2	90.8	67.8	284.4	0.17	29.43	2.83	0.99	High	High	High	High	High	High	High	High
FALSE	High	Master Protein	NP_611269.1	fab1 kinase, isoform A [Drosophila melanogaster]	0.006	6.058	2	3	5	3	1	1809	204.5	7.59	78	3	2.246	1.881	2.132	0.20021	0.391624	0.271337	59	110.9	132.5	125.7	17.25	38.33	17.2	15.45	High	High	High	High	High	High	High	High
FALSE	High	Master Protein	NP_650291.1	yurt, isoform A [Drosophila melanogaster]	0.008	4.993	3	2	2	2	1	972	105.2	8.1	36	2	2.246	2.546	2.049	0.0912738	0.0815955	0.156621	56.6	144.2	127.2	116.1	6.11	15.27	30.37	4.75	High	High	High	High	High	High	High	High
FALSE	High	Master Protein	NP_001247017.1	Fmr1, isoform G [Drosophila melanogaster]	0	100.649	37	23	60	23	1	729	81	8.7	1081	23	2.245	2.129	2.839	0.0596663	0.0913652	0.0528703	49.7	105.7	111.5	141	7.7	9.14	9.25	9.88	High	High	High	High	High	High	High	High
FALSE	High	Master Protein	NP_651416.1	CG5028, isoform A [Drosophila melanogaster]	0	135.275	48	20	166	20	1	402	44.4	6.8	3787	20	2.245	2.113	1.329	0.0431526	0.0665172	0.535903	65	137.3	145.8	86.4	1.99	5.29	23.35	7.95	High	High	High	High	High	High	High	High
FALSE	High	Master Protein	NP_001097705.1	uncharacterized protein Dmel_CG17816, isoform E [Drosophila melanogaster]	0	101.818	35	23	45	2	1	855	93.2	9.79	891	23	2.243	2.821	2.446	0.360892	0.2466	0.332288	50.1	141.4	112.5	122.6	20.44	11.54	8.75	24.59	High	High	High	High	High	High	High	High
FALSE	High	Master Protein	NP_001246653.1	uncharacterized protein Dmel_CG14830, isoform B [Drosophila melanogaster]	0.002	9.103	10	3	6	3	1	323	36.2	9.55	130	3	2.242	3.305	1.884	0.170135	0.0806726	0.340668	49.6	163.8	111.2	93.4	22.59	13.14	4.99	17.46	High	High	High	High	High	High	High	High
FALSE	High	Master Protein	NP_650615.2	uncharacterized protein Dmel_CG31418 [Drosophila melanogaster]	0.002	10.55	12	4	5	4	1	225	25	9.69	34	4	2.242	1.682	9.11	0.0517541	0.191919	0.0186798	33.3	56.1	74.7	303.6	23.54	1.99	16.65	8.6	High	High	High	High	High	High	High	High
FALSE	High	Master Protein	NP_524995.2	retinin [Drosophila melanogaster]	0	20.367	19	3	9	3	1	191	20	6.06	273	3	2.242	1.149	1.156	0.240412	1	1	74.8	85.9	167.6	86.4	4.22	21.77	6.33	28.04	High	High	High	High	High	High	High	High
FALSE	High	Master Protein	NP_611980.1	uncharacterized protein Dmel_CG30427, isoform B [Drosophila melanogaster]	0	18.674	11	5	10	2	1	499	57.5	8.02	195	5	2.241	3.385	8.347	0.114901	0.0525678	0.0238667	31	104.8	69.4	258.5	18.38	1.14	7.16	29.19	High	High	High	High	High	High	High	High
FALSE	High	Master Protein	NP_001285318.1	peroxisomal multifunctional enzyme type 2, isoform B [Drosophila melanogaster]	0	402.218	59	37	403	37	1	598	64	6.57	12017	37	2.241	1.556	1.798	0.0818512	0.398629	0.219867	67.9	105.6	152.1	122	8.09	5.42	5.16	32.61	High	High	High	High	High	High	High	High
FALSE	Low	Master Protein	NP_724239.1	short neuropeptide F precursor [Drosophila melanogaster]	0.052	2.353	4	1	1	1	1	281	32.5	7.97	0	1	2.24	2.923	3.534	0.66973	0.497275	0.361627	47.8	139.7	107.1	169	6.38	72.95	16.46	39.21	High	High	High	High	High	High	High	High
FALSE	High	Master Protein	NP_511075.3	swiss cheese, isoform A [Drosophila melanogaster]	0	39.591	9	11	17	11	1	1425	160.5	7.88	361	11	2.237	2.346	2.066	0.0686633	0.0788471	0.120185	56	131.4	125.3	115.7	1.02	14.55	2.63	12.88	High	High	High	High	High	High	High	High
FALSE	High	Master Protein	NP_477404.1	wrapper [Drosophila melanogaster]	0.001	15.442	7	3	9	3	1	500	55.5	6.04	183	3	2.237	1.248	1.421	0.141935	1	0.765638	71.3	89	159.6	101.4	6.01	35.81	9.89	11.87	High	High	High	High	High	High	High	High
FALSE	High	Master Protein	NP_001284745.1	uncharacterized protein Dmel_CG13366, isoform C [Drosophila melanogaster]	0.006	5.475	3	3	3	3	1	1094	121.6	5.66	29	3	2.236	2.012	1.976	0.160659	0.264606	0.277482	55.6	111.8	124.3	109.8	0.82	24.37	1.67	10.44	High	High	High	High	High	High	High	High
FALSE	High	Master Protein	NP_001284934.1	uncharacterized protein Dmel_CG14445, isoform C [Drosophila melanogaster]	0.004	7.998	6	2	5	2	1	362	40	9.1	95	2	2.235	1.864	2.011	0.206226	0.409848	0.326763	59.9	111.6	133.8	120.4	24.91	10.82	21.9	34.65	High	High	High	High	High	High	High	High
FALSE	High	Master Protein	NP_001245439.1	Calcium-dependent secretion activator, isoform D [Drosophila melanogaster]	0	22.106	5	6	7	6	1	1534	172.5	6.13	151	6	2.235	1.603	1.952	0.0699787	0.308711	0.145447	64	102.5	143	124.9	3.81	12.38	3.5	2.28	High	High	High	High	High	High	High	High
FALSE	High	Master Protein	NP_001033870.1	capulet, isoform B [Drosophila melanogaster]	0	111.891	31	21	59	21	1	783	84.4	5.19	1382	21	2.234	1.854	1.642	0.0435345	0.104198	0.177956	63.4	117.5	141.6	104.1	0.71	9.35	2.67	3.17	High	High	High	High	High	High	High	High
FALSE	Low	Master Protein	NP_001104019.1	uncharacterized protein Dmel_CG41520, isoform A [Drosophila melanogaster]	0.06	2.212	1	1	1	1	1	745	85.2	7.75	43	1	2.233	2.869	1.797	0.542522	0.378612	0.859435	57.1	163.8	127.5	102.6	24.4	13.2	18.86	37.37	High	High	High	High	High	High	High	High
FALSE	High	Master Protein	NP_001247156.1	uncharacterized protein Dmel_CG43102, isoform C [Drosophila melanogaster]	0.003	8.425	2	3	3	3	1	2519	276.9	6.96	75	3	2.231	1.483	1.975	0.337608	0.955629	0.515916	63.5	94.3	141.8	125.5	6.33	53.74	5.83	28.68	High	High	High	High	High	High	High	High
FALSE	High	Master Protein	NP_608378.2	obstructor-A, isoform A [Drosophila melanogaster]	0.002	10.241	15	4	5	4	1	237	26.5	4.79	35	4	2.23	2.868	1.066	0.929059	0.828794	1	64.7	185.6	144.4	69	45.21	64.31	25.57	90.19	High	High	High	High	High	High	High	High
FALSE	High	Master Protein	NP_001285925.1	uncharacterized protein Dmel_CG15293, isoform C [Drosophila melanogaster]	0	101.524	74	20	47	20	1	333	36.7	8.06	968	20	2.23	1.628	2.897	0.0808185	0.321115	0.0617628	53.6	87.3	119.5	155.3	1.33	6.77	5.1	2.59	High	High	High	High	High	High	High	High
FALSE	High	Master Protein	NP_001247035.1	uncharacterized protein Dmel_CG42394, isoform C [Drosophila melanogaster]	0.003	8.385	14	1	4	1	1	77	8.2	6.34	129	1	2.23	2.34	1.661	0.0595473	0.0672391	0.22365	60.8	142.3	135.6	101	0.66	18.63	19.04	14.58	High	High	High	High	High	High	High	High
FALSE	High	Master Protein	NP_001259773.2	uncharacterized protein Dmel_CG12576, isoform F [Drosophila melanogaster]	0	18.836	19	6	6	6	1	369	40.6	4.69	174	6	2.229	2.541	2.623	0.248888	0.207366	0.194846	50.3	127.7	112	131.8	17.86	0.14	7.54	19.58	High	High	High	High	High	High	High	High
FALSE	High	Master Protein	NP_001246578.1	spinophilin, isoform J [Drosophila melanogaster]	0	43.398	8	13	16	13	1	2148	233.3	5.36	419	13	2.226	2.034	2.116	0.12258	0.196479	0.176038	58.4	118.9	130.1	123.6	10.57	1.85	11.45	2.73	High	High	High	High	High	High	High	High
FALSE	High	Master Protein	NP_649158.1	regulatory particle non-ATPase 1 [Drosophila melanogaster]	0	52.7	15	15	40	15	1	919	102.2	5.85	690	15	2.224	1.808	1.465	0.0699787	0.183339	0.45509	67.1	121.3	149.1	98.2	6.92	27.07	0.99	14.43	High	High	High	High	High	High	High	High
FALSE	High	Master Protein	NP_787975.1	uncharacterized protein Dmel_CG15630 [Drosophila melanogaster]	0	35.663	24	10	23	10	1	450	50.7	7.97	390	10	2.222	1.704	1.648	0.0434431	0.145095	0.171923	66.8	113.7	148.3	110	9.87	18.15	1.82	8.23	High	High	High	High	High	High	High	High
FALSE	High	Master Protein	NP_476819.2	adaptor protein complex 2, alpha subunit, isoform A [Drosophila melanogaster]	0	126.779	32	33	74	33	1	940	105.6	7.18	1677	33	2.222	1.762	2.017	0.0269973	0.0772141	0.0568463	63.3	111.5	140.5	127.6	6.83	20.96	4.51	2.51	High	High	High	High	High	High	High	High
FALSE	High	Master Protein	NP_001036740.2	CG7956, isoform F [Drosophila melanogaster]	0	24.824	8	8	11	8	1	1142	127.8	6.19	228	8	2.221	2.236	2.01	0.204657	0.237175	0.317357	56.4	126.1	125.3	113.4	1.88	8.34	2.55	16.99	High	High	High	High	High	High	High	High
FALSE	High	Master Protein	NP_726482.1	epidermal growth factor receptor pathway substrate clone 15, isoform B [Drosophila melanogaster]	0	77.097	22	21	40	1	1	1232	132	5.21	904	21	2.22	2.51	2.735	0.12062	0.103647	0.0890329	50.8	127.5	112.7	138.9	3.06	25.59	18.5	18.83	High	High	High	High	High	High	High	High
FALSE	Low	Master Protein	NP_730304.2	uncharacterized protein Dmel_CG32191, isoform B [Drosophila melanogaster]	0.059	2.235	2	1	2	1	1	564	63.8	6.67	26	1	2.219	2.677	1.935	0.22967	0.166716	0.395925	57.4	153.7	127.4	111.1	13.35	18.39	3.56	30.4	High	High	High	High	High	High	High	High
FALSE	High	Master Protein	NP_649520.1	retinophilin [Drosophila melanogaster]	0.002	9.049	15	3	5	3	1	198	22.7	7.12	104	3	2.219	1.531	1.215	0.0449483	0.257941	0.863734	69.2	105.9	153.5	84.1	11.49	0.09	15.76	1.2	High	High	High	High	High	High	High	High
FALSE	High	Master Protein	NP_610087.2	CG9257 [Drosophila melanogaster]	0	52.911	38	15	37	15	1	347	39.2	5.29	630	15	2.218	2.309	1.952	0.0174959	0.0224811	0.030187	60.1	138.7	133.3	117.3	5.56	4.14	2.73	13.03	High	High	High	High	High	High	High	High
FALSE	High	Master Protein	NP_648992.1	enhancer of decapping 3 [Drosophila melanogaster]	0	15.976	9	5	5	5	1	680	73.4	8.43	114	5	2.218	2.155	1.768	0.0740702	0.10403	0.211012	55.4	119.4	122.9	97.9	18.86	3.51	10.66	1.8	High	High	High	High	High	High	High	High
FALSE	High	Master Protein	NP_523761.2	juvenile hormone-inducible protein 26 [Drosophila melanogaster]	0.002	9.847	8	3	5	3	1	439	50.9	5.24	88	3	2.216	1.546	1.869	0.0235437	0.121484	0.06032	64.8	100.3	143.7	121.1	2.18	13.84	12.46	1.42	High	High	High	High	High	High	High	High
FALSE	High	Master Protein	NP_651455.1	vacuolar protein sorting 2 [Drosophila melanogaster]	0	37.21	39	7	27	7	1	256	27.3	5.66	428	7	2.215	2.121	1.47	0.0633243	0.0941933	0.41341	62.6	132.8	138.8	92.1	4.71	21.89	0.02	16.63	High	High	High	High	High	High	High	High
FALSE	High	Master Protein	NP_001262413.1	alpha-Mannosidase class II a, isoform B [Drosophila melanogaster]	0	15.47	5	6	9	6	1	1109	126.8	7.2	242	6	2.213	1.964	3.037	0.107658	0.193817	0.0661633	54.1	106.2	119.7	164.2	19.53	9.13	1.37	0.56	High	High	High	High	High	High	High	High
FALSE	Low	Master Protein	NP_727694.1	uncharacterized protein Dmel_CG15747, isoform A [Drosophila melanogaster]	0.139	1.185	2	1	1	1	1	387	44.7	5.74	25	1	2.211	2.29	1.813	0.312201	0.32756	0.591835	51.6	118.2	114.1	93.6	18.86	27.81	2.91	7.82	High	High	High	High	High	High	High	High
FALSE	High	Master Protein	NP_001096852.1	eukaryotic translation initiation factor 4G, isoform B [Drosophila melanogaster]	0	161.161	27	40	75	39	1	1919	211	8.35	1762	40	2.21	2.268	1.952	0.0438312	0.0525678	0.0893427	57.3	130.1	126.7	111.9	1.66	11.45	1.24	7.96	High	High	High	High	High	High	High	High
FALSE	High	Master Protein	NP_001260375.1	Ca2+-channel-protein-beta-subunit, isoform L [Drosophila melanogaster]	0	42.197	20	14	22	14	1	844	95.4	7.14	354	14	2.209	2.558	2.066	0.225776	0.18102	0.317794	55	140.6	121.4	113.6	4.66	23.41	0.1	15.76	High	High	High	High	High	High	High	High
FALSE	High	Master Protein	NP_572487.3	PIP82 [Drosophila melanogaster]	0	35.033	11	11	19	11	1	1195	132.3	6.67	375	11	2.209	1.934	1.564	0.25618	0.430639	0.760396	59.5	115	131.3	93	6.27	10.69	15.36	8.39	High	High	High	High	High	High	High	High
FALSE	High	Master Protein	NP_001261000.1	kinesin heavy chain 73, isoform E [Drosophila melanogaster]	0.002	11.021	2	4	4	4	1	1957	218.7	6.33	56	4	2.208	2.131	2.462	0.0649713	0.0941933	0.0687204	55.2	117.6	121.8	135.8	8.3	0.18	14.33	5.1	High	High	High	High	High	High	High	High
FALSE	Low	Master Protein	NP_609556.2	CG6583 [Drosophila melanogaster]	0.1	1.529	5	1	2	1	1	154	17.3	7.75	46	1	2.207	1.757	1.245	0.0360655	0.102397	0.681977	67.4	118.4	148.7	83.9	8.67	21.45	9.86	4.95	High	High	High	High	High	High	High	High
FALSE	High	Master Protein	NP_726730.1	AMP-activated protein kinase alpha subunit, isoform B [Drosophila melanogaster]	0.002	10.577	5	2	4	2	1	582	64.6	8.43	114	2	2.206	1.73	1.556	0.0218385	0.0560161	0.100453	66.1	114.5	145.9	102.9	10.94	6.72	3.52	12.1	High	High	High	High	High	High	High	High
FALSE	High	Master Protein	NP_609590.1	Pih1D1, isoform A [Drosophila melanogaster]	0.002	13.274	17	4	5	3	1	335	38	7.84	114	4	2.204	2.427	3.192	0.12547	0.115299	0.068188	48.6	117.9	107.1	155.1	12.56	27.11	15.83	17.06	High	High	High	High	High	High	High	High
FALSE	High	Master Protein	NP_726473.2	matrix metalloproteinase 1, isoform C [Drosophila melanogaster]	0	20.746	13	6	11	6	1	584	64.6	6.65	169	6	2.204	2.711	1.883	0.0218385	0.0224811	0.0461673	56.9	154.2	125.3	107.1	11.04	5.29	1.67	13.49	High	High	High	High	High	High	High	High
FALSE	High	Master Protein	NP_649691.1	CG1943, isoform A [Drosophila melanogaster]	0	24.281	60	5	20	5	1	118	12.4	9.44	133	5	2.202	2.293	2.191	0.47451	0.494058	0.533859	53.1	121.7	116.9	116.3	3.05	44.11	17.71	26.18	High	High	High	High	High	High	High	High
FALSE	High	Master Protein	NP_650939.2	Rho GTPase activating protein at 93B [Drosophila melanogaster]	0	25.729	6	8	13	8	1	1330	146.2	8.34	244	8	2.201	1.567	1.948	0.0814281	0.371214	0.159107	62.3	97.7	137.2	121.4	3.49	4.62	1.33	7.1	High	High	High	High	High	High	High	High
FALSE	High	Master Protein	NP_001261140.1	jitterbug, isoform N [Drosophila melanogaster]	0	72.156	8	21	31	21	1	2990	322.6	7.44	712	21	2.201	2.044	1.594	0.0259921	0.0423811	0.119464	61.1	125	134.5	97.4	9.93	3.11	5.33	4.54	High	High	High	High	High	High	High	High
FALSE	High	Master Protein	NP_728910.1	maggie, isoform B [Drosophila melanogaster]	0	55.673	63	6	60	1	1	122	13.4	4.75	2111	6	2.2	2.302	4.004	0.289778	0.300129	0.0966382	48.5	111.6	106.6	194.1	23.87	37.27	34.31	14.73	High	High	High	High	High	High	High	High
FALSE	High	Master Protein	NP_477282.2	adult cuticle protein 65Aa [Drosophila melanogaster]	0	28.468	56	4	24	4	1	105	11.3	4.54	848	4	2.2	1.721	1.963	0.370036	0.732889	0.545455	56.2	96.7	123.6	110.3	49.05	2.28	19.95	39.13	High	High	High	High	High	High	High	High
FALSE	High	Master Protein	NP_001284797.1	Rabconnectin-3B, isoform B [Drosophila melanogaster]	0	44.831	8	12	16	12	1	1525	168.4	7.49	374	12	2.2	1.795	1.547	0.0420479	0.107845	0.217295	66.3	119	145.9	102.6	0.12	21.68	10.16	13	High	High	High	High	High	High	High	High
FALSE	High	Master Protein	NP_001245843.1	uncharacterized protein Dmel_CG31663, isoform B [Drosophila melanogaster]	0	25.026	10	8	12	1	1	930	102.7	5.2	170	8	2.199	2.854	3.35	0.433664	0.281649	0.206479	47.2	134.7	103.8	158.1	11.19	55.56	34.54	10.15	High	High	High	High	High	High	High	High
FALSE	Medium	Master Protein	NP_726461.1	piopio, isoform B [Drosophila melanogaster]	0.013	4.353	3	1	1	1	1	462	50.9	5.94	31	1	2.196	2.6	1.362	0.261593	0.197938	1	60.9	158.3	133.7	82.9	25.65	12.39	4.46	47.32	High	High	High	High	High	High	High	High
FALSE	High	Master Protein	NP_001261565.1	Autophagy-related 18a, isoform E [Drosophila melanogaster]	0.002	8.996	7	2	4	2	1	447	47.9	6.74	0	2	2.196	2.469	2.255	0.578232	0.52233	0.60696	55.3	136.6	121.5	124.8	16.94	49.31	25.83	22.63	High	High	High	High	High	High	High	High
FALSE	High	Master Protein	NP_001285006.1	smad on X, isoform B [Drosophila melanogaster]	0.006	6.31	6	3	3	3	1	486	53.6	7.59	35	3	2.195	2.299	1.44	0.17193	0.179157	0.778273	61.6	141.6	135.2	88.7	9.09	28.8	9.55	32.86	High	High	High	High	High	High	High	High
FALSE	High	Master Protein	NP_726377.1	kazachoc, isoform D [Drosophila melanogaster]	0	187.902	29	32	146	1	1	1074	119.2	6.68	3076	32	2.194	2.057	1.258	0.310379	0.421225	1	62	127.6	136.1	78	24.13	8.01	18.24	19.63	High	High	High	High	High	High	High	High
FALSE	High	Master Protein	NP_996031.1	pyridoxal kinase [Drosophila melanogaster]	0	60.614	29	9	37	9	1	304	33.4	6.96	977	9	2.192	1.444	1.649	0.0218385	0.152947	0.0816741	70.2	101.4	153.8	115.7	13.25	3.31	7.99	12.17	High	High	High	High	High	High	High	High
FALSE	High	Master Protein	NP_573377.1	CG8051, isoform A [Drosophila melanogaster]	0	19.112	8	5	11	5	1	616	68.7	9	191	5	2.191	2.209	2.858	0.189139	0.218717	0.11998	50.8	112.2	111.2	145.1	7.44	25.41	1.37	11.57	High	High	High	High	High	High	High	High
FALSE	High	Master Protein	NP_648451.1	procollagen lysyl hydroxylase, isoform A [Drosophila melanogaster]	0	77.079	20	18	47	18	1	721	82.5	5.68	1065	18	2.19	2.737	1.655	0.18142	0.120295	0.517023	60.6	166	132.8	100.4	14.13	10.44	3.65	44.1	High	High	High	High	High	High	High	High
FALSE	High	Master Protein	NP_001097318.1	kank, isoform D [Drosophila melanogaster]	0	20.354	6	6	6	6	1	1339	146.7	8.87	175	6	2.189	2.166	2.028	0.0345227	0.044492	0.0629006	56.5	122.5	123.8	114.7	19.68	2.48	1.1	2.46	High	High	High	High	High	High	High	High
FALSE	High	Master Protein	NP_730611.1	acetyl coenzyme A synthase, isoform A [Drosophila melanogaster]	0	69.404	26	16	36	16	1	670	75.9	5.71	725	16	2.189	1.382	1.566	0.0218385	0.155162	0.0794521	71	98.1	155.4	111.1	0.42	7.62	13.44	2.86	High	High	High	High	High	High	High	High
FALSE	Low	Master Protein	NP_651543.1	Gram-positive specific serine protease, isoform B [Drosophila melanogaster]	0.068	2.042	2	1	1	1	1	377	41.5	6.81	27	1	2.188	1.884	2.101	0.2226	0.402868	0.292527	58.7	110.5	128.3	123.2	1.51	11.69	5.8	1.21	High	High	High	High	High	High	High	High
FALSE	Medium	Master Protein	NP_609994.1	uncharacterized protein Dmel_CG10262 [Drosophila melanogaster]	0.046	2.467	3	1	1	1	1	255	28.4	5.06	30	1	2.187	2.026	1.758	0.0360822	0.0578165	0.105968	63.4	128.4	138.6	111.4	3.07	7.85	11.19	2.02	High	High	High	High	High	High	High	High
FALSE	Low	Master Protein	NP_001137646.1	quiver, isoform B [Drosophila melanogaster]	0.096	1.573	4	1	1	1	1	158	18.1	7.23	26	1	2.187	1.822	1.672	0.0477327	0.117034	0.171683	64.5	117.6	141.1	107.9	0.27	8.35	1.83	4.85	High	High	High	High	High	High	High	High
FALSE	High	Master Protein	NP_608866.1	mextli, isoform B [Drosophila melanogaster]	0.003	8.396	6	3	5	3	1	653	70.1	6.58	150	3	2.186	2.194	2.198	0.267008	0.308711	0.305597	56.8	124.6	124.1	124.8	1.99	2.61	4.53	5.79	High	High	High	High	High	High	High	High
FALSE	High	Master Protein	NP_610342.1	Acetyl-CoA carboxylase, isoform A [Drosophila melanogaster]	0	232.682	22	51	136	51	1	2482	278.4	6.24	3260	51	2.186	1.67	1.825	0.0445404	0.157797	0.113847	66.5	111.1	145.4	121.4	4.41	12.97	16.1	18.41	High	High	High	High	High	High	High	High
FALSE	High	Master Protein	NP_651530.1	cuticular protein 97Eb [Drosophila melanogaster]	0	16.482	20	5	5	5	1	235	26.7	8.15	87	5	2.185	2.846	1.442	0.0409973	0.0356249	0.301788	57.2	162.8	125	82.5	19.95	4.07	1.27	7.2	High	High	High	High	High	High	High	High
FALSE	High	Master Protein	NP_477060.1	igloo, isoform A [Drosophila melanogaster]	0	107.072	51	14	54	14	1	240	25	5.33	1949	14	2.184	2.397	1.971	0.351387	0.318744	0.510734	57.7	138.4	126.1	113.8	6.45	43.21	2.73	13.76	High	High	High	High	High	High	High	High
FALSE	High	Master Protein	NP_729581.1	variable nurse cells, isoform B [Drosophila melanogaster]	0.002	14.389	16	4	6	4	1	196	22.3	6.95	131	4	2.181	2.121	0.976	0.0755554	0.105752	1	65.9	139.7	143.7	64.3	4.62	31.73	0.86	12.6	High	High	High	High	High	High	High	High
FALSE	High	Master Protein	NP_726650.2	uncharacterized protein Dmel_CG32017, isoform B [Drosophila melanogaster]	0	43.403	24	13	26	13	1	482	55.3	9.77	252	13	2.181	1.697	2.11	0.140397	0.391382	0.189694	61.9	105.1	135	130.6	17.16	21.8	2.42	15.76	High	High	High	High	High	High	High	High
FALSE	High	Master Protein	NP_611968.1	CG3589 [Drosophila melanogaster]	0	20.189	11	4	10	4	1	509	56.4	7.9	515	4	2.178	1.638	1.619	0.0275163	0.100838	0.113133	66.8	109.3	145.4	108.1	13.27	1.57	4.16	9.26	High	High	High	High	High	High	High	High
FALSE	High	Master Protein	NP_001261020.1	aspartyl beta-hydroxylase, isoform L [Drosophila melanogaster]	0	61.468	16	15	40	8	1	991	113.3	4.37	417	15	2.178	1.647	2.561	0.0488499	0.182926	0.051562	61.7	101.5	134.3	157.9	4.47	14.4	12.41	19.8	High	High	High	High	High	High	High	High
FALSE	High	Master Protein	NP_001285118.1	CG1737, isoform B [Drosophila melanogaster]	0.002	9.683	4	4	4	4	1	943	102.1	9.95	59	4	2.178	2.94	1.693	0.389336	0.226595	0.771028	50.2	147.6	109.3	85	46.06	33.87	18.07	17.18	High	High	High	High	High	High	High	High
FALSE	High	Master Protein	NP_731967.2	glycogen synthase, isoform A [Drosophila melanogaster]	0	61.961	22	15	28	15	1	709	81.7	6.65	513	15	2.177	1.697	1.461	0.174269	0.459501	0.743052	67.6	114.8	147.2	98.8	8.28	39.42	18.03	6.07	High	High	High	High	High	High	High	High
FALSE	High	Master Protein	NP_732941.2	spastin, isoform A [Drosophila melanogaster]	0.002	13.703	9	5	5	5	1	758	82.7	9.52	57	5	2.175	2.712	2.588	0.593495	0.447941	0.482464	42.9	116.3	93.3	111	9.65	19.27	7.58	50.75	High	High	High	High	High	High	High	High
FALSE	Medium	Master Protein	NP_648051.1	CG8398, isoform A [Drosophila melanogaster]	0.011	4.606	2	1	1	1	1	537	61	7.28	76	1	2.175	1.508	1.627	0.105232	0.506348	0.363183	69.8	105.3	151.9	113.7	10.24	30.12	11.61	15.37	High	High	High	High	High	High	High	High
FALSE	Low	Master Protein	NP_001163748.1	CG5521, isoform B [Drosophila melanogaster]	0.052	2.366	1	1	1	1	1	1964	216.9	8.57	26	1	2.175	2.275	1.573	0.0617386	0.0709261	0.277925	55.6	126.6	121	87.5	13.38	11.32	1.9	5.09	High	High	High	High	High	High	High	High
FALSE	High	Master Protein	NP_511080.2	TNF-receptor-associated factor 6 [Drosophila melanogaster]	0.002	11.249	7	2	3	2	1	475	53.8	7.37	129	2	2.174	1.39	1.747	0.0641751	0.533626	0.183325	71	98.7	154.4	124	8.32	21.51	17.15	14.85	High	High	High	High	High	High	High	High
FALSE	High	Master Protein	NP_523705.2	off-track, isoform A [Drosophila melanogaster]	0.002	14.2	3	3	5	3	1	1033	114.2	6.89	174	3	2.173	2.093	1.828	0.024906	0.0369443	0.0638105	59.2	123.9	128.7	108.2	16.86	6.22	1.27	11.06	High	High	High	High	High	High	High	High
FALSE	High	Master Protein	NP_001247280.1	multiple ankyrin repeats single KH domain, isoform C [Drosophila melanogaster]	0	19.959	2	6	7	6	1	4010	424	5.67	165	6	2.172	3.032	2.308	0.249265	0.128957	0.247124	47.4	143.7	103	109.4	1.38	23.71	0.07	17.81	High	High	High	High	High	High	High	High
FALSE	High	Master Protein	NP_572767.1	Upf1, isoform A [Drosophila melanogaster]	0.002	14.898	7	5	6	5	1	1180	129.8	7.33	104	5	2.171	1.728	1.399	0.108825	0.296165	0.683127	65.5	113.2	142.3	91.7	0.68	28.05	0.05	27.37	High	High	High	High	High	High	High	High
FALSE	High	Master Protein	NP_608468.1	uncharacterized protein Dmel_CG17598, isoform A [Drosophila melanogaster]	0.004	7.529	5	3	6	3	1	651	72.8	6.46	65	3	2.171	2.716	1.999	0.724341	0.573097	0.874357	59.1	160.4	128.3	118.1	11.65	23.58	25.12	54.68	High	High	High	High	High	High	High	High
FALSE	High	Master Protein	NP_001303575.1	uncharacterized protein Dmel_CG42265, isoform F [Drosophila melanogaster]	0	28.213	5	6	10	6	1	1596	171.9	4.93	281	6	2.171	1.625	1.613	0.0285565	0.107742	0.119975	66.8	108.5	144.9	107.6	5.81	20.7	6.16	3.38	High	High	High	High	High	High	High	High
FALSE	High	Master Protein	NP_572455.1	uncharacterized protein Dmel_CG15337 [Drosophila melanogaster]	0.004	7.483	8	3	5	3	1	405	45.2	7.91	54	3	2.17	1.949	4.704	0.388693	0.56471	0.100137	43.2	84.2	93.8	203.2	4.34	19.71	40.26	14.24	High	High	High	High	High	High	High	High
FALSE	High	Master Protein	NP_610473.1	Cyp4p3 [Drosophila melanogaster]	0	30.808	12	8	13	6	1	515	59.6	6.49	276	8	2.17	1.743	3.175	0.0218385	0.051235	0.0195785	55.1	96	119.5	174.9	17.88	0.63	4.33	3.77	High	High	High	High	High	High	High	High
FALSE	High	Master Protein	NP_610602.2	uncharacterized protein Dmel_CG12309 [Drosophila melanogaster]	0.004	7.342	7	2	3	2	1	527	59.1	5.72	182	2	2.17	1.837	2.611	0.2226	0.426716	0.164109	56.9	104.6	123.5	148.6	10.56	10.43	26.72	13.53	High	High	High	High	High	High	High	High
FALSE	High	Master Protein	NP_524448.3	pyruvate kinase, isoform A [Drosophila melanogaster]	0	245.726	64	34	180	34	1	533	57.4	7.44	4435	34	2.169	1.675	1.529	0.0588325	0.196479	0.301819	69	115.6	149.8	105.6	8.92	21.87	6.32	18.58	High	High	High	High	High	High	High	High
FALSE	High	Master Protein	NP_733405.2	CIN85 and CD2AP related, isoform C [Drosophila melanogaster]	0	41.946	18	13	20	13	1	882	92.4	9	501	13	2.168	2.155	2.016	0.0595473	0.0791012	0.101788	58.6	126.3	127.1	118.2	2.88	5.7	6.97	2.56	High	High	High	High	High	High	High	High
FALSE	Medium	Master Protein	NP_727792.2	uncharacterized protein Dmel_CG14408, isoform E [Drosophila melanogaster]	0.011	4.437	2	1	1	1	1	684	73.9	6.07	43	1	2.166	2.264	2.196	0.169959	0.177433	0.196456	56.7	128.4	122.8	124.5	4.22	17.73	17.56	5.14	High	High	High	High	High	High	High	High
FALSE	High	Master Protein	NP_523748.2	cytochrome P450-6a9 [Drosophila melanogaster]	0	15.791	11	5	8	2	1	504	58	7.69	160	5	2.165	1.695	2.256	0.420539	0.775382	0.433659	65.3	110.7	141.5	147.4	22.26	44.32	17.47	28.72	High	High	High	High	High	High	High	High
FALSE	High	Master Protein	NP_610326.1	CG1882, isoform A [Drosophila melanogaster]	0	48.442	35	12	27	12	1	454	50.3	7.56	444	12	2.165	1.614	1.808	0.0700088	0.27668	0.172592	65.7	106.1	142.3	118.8	12.49	3.74	2.11	1.72	High	High	High	High	High	High	High	High
FALSE	Low	Master Protein	NP_649378.1	CG7139 [Drosophila melanogaster]	0.06	2.206	1	1	1	1	1	969	109.3	6.38	0	1	2.163	1.755	2.167	0.378138	0.700317	0.426016	60.7	106.6	131.4	131.6	13.48	10.77	25.2	32.72	High	High	High	High	High	High	High	High
FALSE	High	Master Protein	NP_727985.2	calcineurin A at 14F, isoform A [Drosophila melanogaster]	0	83.097	31	16	60	8	1	584	64.2	6.07	1438	16	2.161	1.613	1.746	0.132737	0.444946	0.328892	64.8	104.6	140.1	113.2	4.38	13.72	6.43	0.94	High	High	High	High	High	High	High	High
FALSE	High	Master Protein	NP_523713.2	lachesin [Drosophila melanogaster]	0	47.712	23	8	29	8	1	359	39.9	5.45	1062	8	2.161	1.811	1.492	0.0502106	0.12346	0.301788	67.3	122	145.5	100.4	14.6	21.23	5.57	12.6	High	High	High	High	High	High	High	High
FALSE	High	Master Protein	NP_572586.2	CG9686 [Drosophila melanogaster]	0.002	11.97	20	4	7	4	1	162	17.6	5.91	29	4	2.16	2.998	1.593	0.100447	0.0526973	0.377005	57.1	171.2	123.3	91	4.25	28.95	14.53	4.07	High	High	High	High	High	High	High	High
FALSE	High	Master Protein	NP_001259560.1	Rab3 GDP-GTP exchange factor, isoform H [Drosophila melanogaster]	0	28.394	5	12	13	12	1	2154	232.7	9.07	164	12	2.159	1.883	1.831	0.0989801	0.195443	0.216454	63.6	119.7	137.3	116.5	7.02	5.45	9.36	3.98	High	High	High	High	High	High	High	High
FALSE	Low	Master Protein	NP_730278.1	elevated during infection [Drosophila melanogaster]	0.069	1.991	10	1	1	1	1	115	12.8	7.88	25	1	2.159	2.117	8.683	0.759758	0.854483	0.13584	31.9	67.5	68.9	277	22.69	80.44	13.44	34.3	High	High	High	High	High	High	High	High
FALSE	High	Master Protein	NP_476573.1	hook [Drosophila melanogaster]	0	31.892	16	9	10	9	1	679	76.6	5.35	178	9	2.158	1.937	2.148	0.111259	0.193672	0.143645	59.7	115.6	128.8	128.2	4.34	24.56	0.67	16.15	High	High	High	High	High	High	High	High
FALSE	High	Master Protein	NP_001263001.1	slamdance, isoform D [Drosophila melanogaster]	0	20.921	6	8	11	8	1	1194	134.2	6.3	143	8	2.158	2.162	2.499	0.0653917	0.0840788	0.0642949	56	121	120.8	139.9	0.91	0.33	2.65	7.97	High	High	High	High	High	High	High	High
FALSE	High	Master Protein	NP_001259972.1	NTPase, isoform F [Drosophila melanogaster]	0	144.709	44	24	99	24	1	524	57.8	8.65	1930	24	2.158	1.23	1.578	0.0149001	0.122552	0.0300723	74	91	159.6	116.7	8.62	1.64	2.35	2.17	High	High	High	High	High	High	High	High
FALSE	High	Master Protein	NP_524426.2	cortactin, isoform A [Drosophila melanogaster]	0	47.55	22	15	25	15	1	559	61	5.2	219	15	2.157	2.267	1.945	0.362313	0.366382	0.526686	58.9	133.5	127.1	114.6	0.76	40.21	3.39	25.13	High	High	High	High	High	High	High	High
FALSE	High	Master Protein	NP_609212.2	uncharacterized protein Dmel_CG14274 [Drosophila melanogaster]	0.002	12.15	17	3	6	3	1	187	20.4	5.44	57	3	2.156	1.757	1.713	0.179553	0.408342	0.442126	65.7	115.4	141.6	112.5	9.69	28.93	6.51	8.96	High	High	High	High	High	High	High	High
FALSE	High	Master Protein	NP_648300.3	UGP, isoform A [Drosophila melanogaster]	0	114.642	43	24	82	1	1	520	58.7	7.39	1553	24	2.155	2.322	5.946	0.20287	0.192295	0.0452537	40.6	94.4	87.6	241.6	11.28	5.36	2.86	40.28	High	High	High	High	High	High	High	High
FALSE	High	Master Protein	NP_001137842.2	Hig-anchoring scaffold protein, isoform G [Drosophila melanogaster]	0	20.881	5	5	19	5	1	1677	183.4	7.02	188	5	2.155	1.973	1.737	0.0530776	0.0925774	0.154967	63.8	125.8	137.4	110.8	7.07	10.69	15.87	7.47	High	High	High	High	High	High	High	High
FALSE	High	Master Protein	NP_723239.1	uncharacterized protein Dmel_CG31908, isoform A [Drosophila melanogaster]	0.006	6.125	4	2	2	2	1	392	42.9	8.91	79	2	2.154	2.248	2.004	0.226345	0.238278	0.326779	56.8	127.6	122.3	113.8	7.09	14.47	9.77	27.9	High	High	High	High	High	High	High	High
FALSE	High	Master Protein	NP_650592.1	protein associated with topo II related - 1, isoform A [Drosophila melanogaster]	0	18.171	5	4	8	4	1	968	108.2	7.83	186	4	2.153	2.632	2.288	0.328802	0.232998	0.321752	52.8	139	113.8	120.9	34.83	18.69	19.57	17.06	High	High	High	High	High	High	High	High
FALSE	High	Master Protein	NP_001285311.1	mind-meld, isoform J [Drosophila melanogaster]	0	55.34	10	15	35	1	1	1484	162.5	6.54	597	15	2.152	2.074	2.428	0.18172	0.242372	0.15736	53.4	110.7	114.9	129.6	27.65	19.86	19.22	11.91	High	High	High	High	High	High	High	High
FALSE	High	Master Protein	NP_001285275.1	CG7860, isoform B [Drosophila melanogaster]	0.004	7.562	7	2	4	2	1	332	34.8	5.69	53	2	2.152	2.409	2.621	0.0744685	0.0705243	0.0642949	54.7	131.7	117.7	143.3	1.25	14.15	13.32	15.43	High	High	High	High	High	High	High	High
FALSE	High	Master Protein	NP_001260291.1	numb, isoform D [Drosophila melanogaster]	0	26.627	16	9	12	9	1	556	60.6	9.55	208	9	2.149	2.405	1.99	0.452712	0.397224	0.599232	56.8	136.5	122	113	2.37	34	6.16	14.89	High	High	High	High	High	High	High	High
FALSE	High	Master Protein	NP_648171.1	CG7565 [Drosophila melanogaster]	0	16.739	4	4	5	4	1	1069	117.2	5.44	128	4	2.148	1.608	2.198	0.0492147	0.197013	0.0663528	64.3	103.4	138.1	141.3	7.99	24.81	6.66	1.35	High	High	High	High	High	High	High	High
FALSE	High	Master Protein	NP_648107.3	CG8596, isoform A [Drosophila melanogaster]	0.002	11.363	8	3	4	3	1	546	61	7.78	54	3	2.147	1.445	1.298	0.0218385	0.121073	0.266749	72.4	104.6	155.4	93.9	13.91	7.19	3.84	0.71	High	High	High	High	High	High	High	High
FALSE	High	Master Protein	NP_542443.4	tweety, isoform A [Drosophila melanogaster]	0	15.559	4	4	7	4	1	970	105.8	8.13	135	4	2.146	2.098	1.596	0.0412584	0.0553876	0.171683	63.7	133.6	136.7	101.6	15.52	13.79	0.31	15.03	High	High	High	High	High	High	High	High
FALSE	Medium	Master Protein	NP_573262.2	CG6867 [Drosophila melanogaster]	0.044	2.565	1	1	2	1	1	949	104.6	6.87	15	1	2.146	2.058	1.878	0.173172	0.236171	0.310899	62.7	129.1	134.5	117.8	5.92	18.41	1.9	13.45	High	High	High	High	High	High	High	High
FALSE	Low	Master Protein	NP_572569.1	uncharacterized protein Dmel_CG15317 [Drosophila melanogaster]	0.068	2.028	4	1	1	1	1	193	21.9	6.38	29	1	2.143	0.994	1.326	0.189311	1	0.960636	79.5	79	170.4	105.4	21.1	16.59	23.38	2.56	High	High	High	High	High	High	High	High
FALSE	Medium	Master Protein	NP_609319.2	uncharacterized protein Dmel_CG13124, isoform A [Drosophila melanogaster]	0.019	3.792	2	1	1	1	1	510	55.8	9.57	47	1	2.143	2.718	1.803	0.305987	0.195856	0.555554	56.3	153.1	120.7	101.6	0.07	20	12.18	0.55	High	High	High	High	High	High	High	High
FALSE	High	Master Protein	NP_001260321.1	ubiquitin specific protease 14, isoform B [Drosophila melanogaster]	0	32.892	16	8	19	8	1	475	53.7	6.25	464	8	2.143	0.565	1.659	0.0471984	0.122875	0.167025	76.2	43	163.3	126.5	12.01	22.73	4.06	3.34	High	High	High	High	High	High	High	High
FALSE	High	Master Protein	NP_732033.1	Ataxin-2, isoform B [Drosophila melanogaster]	0	28.695	15	10	12	10	1	1084	117.5	8.91	181	10	2.141	2.423	1.778	0.0636546	0.056118	0.16375	58.8	142.4	125.9	104.5	3.4	2.76	3	9.29	High	High	High	High	High	High	High	High
FALSE	High	Master Protein	NP_651446.2	uncharacterized protein Dmel_CG42235, isoform D [Drosophila melanogaster]	0	31.498	9	7	24	3	1	698	75.1	7.97	626	7	2.141	0.975	1.858	0.0596663	1	0.132841	71	69.2	152	131.9	9.75	23.27	9.82	0.56	High	High	High	High	High	High	High	High
FALSE	Medium	Master Protein	NP_647844.2	uncharacterized protein Dmel_CG14984, isoform B [Drosophila melanogaster]	0.011	4.604	20	1	1	1	1	115	12.1	5.43	32	1	2.139	2.558	1.839	0.770225	0.66888	0.977698	59.2	151.6	126.7	109	3.32	59	44.95	18.11	High	High	High	High	High	High	High	High
FALSE	High	Master Protein	NP_524454.2	klingon [Drosophila melanogaster]	0.002	12.817	10	4	5	4	1	545	60.1	8.78	129	4	2.139	1.95	1.656	0.0218385	0.035941	0.0687204	64.8	126.5	138.7	107.4	10.03	5.19	5.37	13.22	High	High	High	High	High	High	High	High
FALSE	High	Master Protein	NP_651958.2	NtR, isoform A [Drosophila melanogaster]	0.006	5.85	4	3	4	3	1	585	66.8	7.14	49	3	2.138	1.686	1.371	0.301488	0.655293	1	73.9	124.6	158	101.3	8.2	21.47	9.98	24.33	High	High	High	High	High	High	High	High
FALSE	High	Master Protein	NP_722657.1	dreadlocks, isoform B [Drosophila melanogaster]	0	33.098	22	8	15	8	1	548	60.4	8.53	313	8	2.135	1.983	1.867	0.0693589	0.112425	0.146081	58.9	116.9	125.8	110.1	1.97	10.89	2.34	14.07	High	High	High	High	High	High	High	High
FALSE	High	Master Protein	NP_001260555.1	mind bomb 2, isoform C [Drosophila melanogaster]	0.002	14.45	7	4	5	4	1	1049	114.8	7.64	157	4	2.134	1.633	1.662	0.146234	0.443418	0.413264	66.2	108	141.2	109.9	11.12	28.91	5.04	3.45	High	High	High	High	High	High	High	High
FALSE	High	Master Protein	NP_001163600.1	acetylcholine esterase, isoform B [Drosophila melanogaster]	0	76.012	27	13	49	13	1	649	71.8	6.1	1274	13	2.133	1.865	1.665	0.0621005	0.128957	0.206503	66.5	124	141.8	110.6	9.4	8.84	5.96	6.63	High	High	High	High	High	High	High	High
FALSE	High	Master Protein	NP_611271.3	double hit, isoform B [Drosophila melanogaster]	0	23.212	21	6	12	6	1	274	29.8	5.76	402	6	2.133	1.713	1.621	0.0381761	0.107742	0.145447	66.8	114.4	142.5	108.3	8.02	1.82	2.77	5.69	High	High	High	High	High	High	High	High
FALSE	High	Master Protein	NP_001097174.1	fasciclin 3, isoform D [Drosophila melanogaster]	0	78.83	23	12	77	4	1	577	63.3	6.1	1747	12	2.133	2.382	1.887	0.0149001	0.0224811	0.0195785	58.3	139	124.4	110.1	2.21	7	1.44	4.77	High	High	High	High	High	High	High	High
FALSE	High	Master Protein	NP_524205.2	Syntrophin-like 1, isoform B [Drosophila melanogaster]	0.004	7.151	6	2	3	2	1	627	67	6.68	62	2	2.131	1.443	1.508	0.147086	0.693562	0.591835	72.4	104.5	154.3	109.2	20.19	12.97	2.43	15.26	High	High	High	High	High	High	High	High
FALSE	Medium	Master Protein	NP_609535.1	CG6734 [Drosophila melanogaster]	0.028	3.306	1	2	3	2	1	1953	217.5	6.7	43	2	2.13	2.509	2.185	0.0670326	0.0536159	0.0845031	55.6	139.4	118.4	121.4	10.74	5.73	5.09	8.21	High	High	High	High	High	High	High	High
FALSE	High	Master Protein	NP_608563.1	Autophagy-related 4a, isoform A [Drosophila melanogaster]	0.005	6.599	5	2	3	2	1	411	45.6	4.93	108	2	2.13	2.129	1.426	0.072921	0.0950498	0.484537	62.8	133.8	133.8	89.6	20.28	14.89	0.6	21.33	High	High	High	High	High	High	High	High
FALSE	Low	Master Protein	NP_001097508.2	Dpr-interacting protein delta, isoform D [Drosophila melanogaster]	0.064	2.113	2	1	1	1	1	469	51.9	8.65	31	1	2.128	1.978	1.48	0.302496		0.845879	66.2	130.9	140.9	98	13.52		30.29	5.67	High	High	Not Found	High	High	High	High	High
FALSE	High	Master Protein	NP_650849.1	CG4462 [Drosophila melanogaster]	0.002	9.444	5	3	5	3	1	573	63.6	6.96	81	3	2.126	1.555	1.476	0.0323923	0.141338	0.193529	70.4	109.5	149.7	103.9	6.54	3.2	15.38	4.92	High	High	High	High	High	High	High	High
FALSE	Medium	Master Protein	NP_572535.1	uncharacterized protein Dmel_CG12056 [Drosophila melanogaster]	0.011	4.429	6	2	2	2	1	287	32.6	5.58	42	2	2.126	1.366	1.672	0.0832102	0.639005	0.257992	67.9	92.8	144.4	113.5	13.49	17.45	15.9	14.17	High	High	High	High	High	High	High	High
FALSE	High	Master Protein	NP_726570.1	Calcium/calmodulin-dependent protein kinase I, isoform B [Drosophila melanogaster]	0	23.402	21	6	8	6	1	405	45.1	6.76	200	6	2.124	1.422	1.748	0.0481863	0.361328	0.13654	69.7	99.2	148.1	121.9	5.7	23.73	2.7	10.18	High	High	High	High	High	High	High	High
FALSE	High	Master Protein	NP_001287456.1	metabotropic GABA-B receptor subtype 2, isoform C [Drosophila melanogaster]	0	27.187	5	7	14	7	1	1224	138.4	8.73	256	7	2.123	1.481	1.534	0.0345227	0.197896	0.167589	69.6	103.1	147.8	106.8	14.94	10.22	6.65	5.23	High	High	High	High	High	High	High	High
FALSE	High	Master Protein	NP_001163095.1	protein kinase N, isoform H [Drosophila melanogaster]	0	18.834	8	7	8	7	1	1284	142.1	7.28	117	7	2.121	1.512	1.802	0.226517	0.732889	0.433659	64.5	97.6	136.9	116.3	3.51	22.58	9.41	2.18	High	High	High	High	High	High	High	High
FALSE	High	Master Protein	NP_651003.1	cytochrome c heme lyase, isoform A [Drosophila melanogaster]	0	95.558	43	17	139	17	1	281	32	7.21	1650	17	2.121	2.231	1.655	0.0293507	0.0356249	0.100101	62.1	138.6	131.8	102.8	1.17	8.79	8.39	3.39	High	High	High	High	High	High	High	High
FALSE	High	Master Protein	NP_001260795.1	lingerer, isoform K [Drosophila melanogaster]	0	84.125	18	18	49	18	1	1417	144.3	7.21	1350	18	2.121	2.802	2.266	0.201492	0.111472	0.196629	51.2	143.6	108.7	116.1	6.06	9.19	6.04	6.71	High	High	High	High	High	High	High	High
FALSE	High	Master Protein	NP_609595.1	vacuolar H[+] ATPase 68kD subunit 3 [Drosophila melanogaster]	0	83.183	18	13	173	4	1	743	82.3	5.21	6127	13	2.12	1.843	3.037	0.0224354	0.0443118	0.0214289	55	101.3	116.6	167	6.63	2.24	17.83	2.57	High	High	High	High	High	High	High	High
FALSE	High	Master Protein	NP_524299.1	metallothionein A, isoform A [Drosophila melanogaster]	0.002	11.87	60	3	8	3	1	40	3.9	7.78	163	3	2.12	3.552	1.798	0.610966	0.27213	0.875197	53.8	191.1	114.1	96.8	11.68	50.59	18.08	17.79	High	High	High	High	High	High	High	High
FALSE	High	Master Protein	NP_476590.1	kinesin heavy chain [Drosophila melanogaster]	0	213.097	45	51	107	51	1	975	110.3	5.77	2251	51	2.12	1.773	1.477	0.0401156	0.0963434	0.235962	67.5	119.7	143.1	99.7	2.12	20.16	8.75	12.05	High	High	High	High	High	High	High	High
FALSE	High	Master Protein	NP_001036373.1	clumsy, isoform B [Drosophila melanogaster]	0	21.514	7	7	8	7	1	1002	112.6	5.62	166	7	2.119	1.83	1.347	0.0386046	0.0825091	0.403599	68.9	126	146	92.8	9.44	20.96	7	7.34	High	High	High	High	High	High	High	High
FALSE	High	Master Protein	NP_523861.1	unzipped, isoform A [Drosophila melanogaster]	0	91.695	36	17	48	17	1	488	54.3	6.38	1200	17	2.119	1.89	1.647	0.0218385	0.035941	0.0649011	65.8	124.4	139.5	108.4	9.93	0.18	1.34	8.44	High	High	High	High	High	High	High	High
FALSE	High	Master Protein	NP_648328.1	CG3408, isoform A [Drosophila melanogaster]	0.002	14.258	16	4	10	4	1	331	36.8	9.45	183	4	2.119	0.956	8.247	0.213146	1	0.034933	37.1	35.5	78.6	306	4.06	25.08	13.76	24.11	High	High	High	High	High	High	High	High
FALSE	High	Master Protein	NP_524061.1	dynactin 1, p150 subunit [Drosophila melanogaster]	0	64.099	15	18	26	18	1	1265	141.1	5.62	485	18	2.119	1.935	1.846	0.0422096	0.074507	0.0916857	62.2	120.3	131.7	114.8	8.47	13.61	10.6	2.08	High	High	High	High	High	High	High	High
FALSE	High	Master Protein	NP_001261450.1	ribosomal protein S6 kinase, isoform B [Drosophila melanogaster]	0.003	8.362	6	3	6	3	1	490	55.4	6.04	254	3	2.117	2.118	1.515	0.301072	0.346022	0.831196	62.9	133.2	133.1	95.3	1.38	6.2	7.54	7.91	High	High	High	High	High	High	High	High
FALSE	High	Master Protein	NP_001260279.1	CG9586, isoform C [Drosophila melanogaster]	0.004	7.864	7	3	4	3	1	218	25	5.01	72	3	2.115	2.272	1.821	0.140279	0.13511	0.278484	58.4	132.6	123.4	106.3	8.97	15.69	2.4	4.37	High	High	High	High	High	High	High	High
FALSE	High	Master Protein	NP_730192.2	lasp, isoform B [Drosophila melanogaster]	0	59.42	23	13	26	13	1	657	74.2	7.88	732	13	2.115	2.158	2.215	0.161863	0.181962	0.171683	57.7	124.5	122	127.8	0.7	29.21	2.68	12.8	High	High	High	High	High	High	High	High
FALSE	High	Master Protein	NP_609738.1	uncharacterized protein Dmel_CG15270, isoform A [Drosophila melanogaster]	0.002	14.958	4	5	6	5	1	1338	147.4	7.78	126	5	2.115	0.889	0.999	0.368483	1	1	83.4	74.2	176.4	83.3	3.39	51.24	8.08	34.36	High	High	High	High	High	High	High	High
FALSE	High	Master Protein	NP_476667.1	poly(A) binding protein, isoform A [Drosophila melanogaster]	0	105.596	41	19	132	19	1	634	69.9	9.31	3035	19	2.114	1.892	3.181	0.043289	0.0809547	0.0315077	51.9	98.2	109.7	165.1	5.51	12.92	6.66	1.23	High	High	High	High	High	High	High	High
FALSE	High	Master Protein	NP_001245766.1	uncharacterized protein Dmel_CG14232, isoform B [Drosophila melanogaster]	0.002	14.408	9	3	6	3	1	480	55	4.87	153	3	2.113	1.415	1.505	0.0218385	0.13103	0.0932301	68.8	97.3	145.3	103.5	2	4.88	4.81	1.84	High	High	High	High	High	High	High	High
FALSE	High	Master Protein	NP_001303467.1	Kctd12-like, isoform B [Drosophila melanogaster]	0	34.86	36	9	16	9	1	228	26	6.87	151	9	2.113	1.426	2.051	0.0743988	0.492861	0.112371	66.8	95.3	141.2	137.1	20.82	16.91	3.92	8.35	High	High	High	High	High	High	High	High
FALSE	High	Master Protein	NP_732721.1	CG5382 [Drosophila melanogaster]	0	24.218	18	6	13	6	1	299	33.5	8.53	285	6	2.113	2.416	3.054	0.0382191	0.0360521	0.0300261	48.6	117.5	102.8	148.6	18.89	0.6	10.54	7.51	High	High	High	High	High	High	High	High
FALSE	High	Master Protein	NP_001261538.1	uncharacterized protein Dmel_CG44195 [Drosophila melanogaster]	0	31.864	21	7	10	7	1	694	75.6	4.41	355	7	2.111	1.785	1.647	0.205434	0.405837	0.525595	64.3	114.9	135.8	106	22.24	7.63	4.44	2.53	High	High	High	High	High	High	High	High
FALSE	High	Master Protein	NP_001247319.1	scribbled, isoform N [Drosophila melanogaster]	0	125.576	17	32	68	5	1	2554	277.2	5.44	1399	32	2.11	2.352	2.365	0.27663	0.242372	0.235532	53	124.6	111.8	125.3	1.59	22.21	12.36	4.49	High	High	High	High	High	High	High	High
FALSE	Medium	Master Protein	NP_477360.2	pterin-4a-carbinolamine dehydratase [Drosophila melanogaster]	0.038	2.8	5	1	2	1	1	192	21.1	9.76	0	1	2.109	1.11	1.191	0.0697482	1	0.992294	78.5	87.2	165.6	93.6	23.82	15.1	6.91	12.41	High	High	High	High	High	High	High	High
FALSE	Medium	Master Protein	NP_001287536.1	Lnk, isoform D [Drosophila melanogaster]	0.024	3.498	1	1	1	1	1	728	77.5	6.64	44	1	2.106	1.694	1.641	0.139856	0.36166	0.404707	66.4	112.4	139.8	108.9	0.84	32.53	14.15	7.25	High	High	High	High	High	High	High	High
FALSE	High	Master Protein	NP_609339.1	obstructor-B [Drosophila melanogaster]	0	21.704	18	5	9	5	1	337	38.1	5.57	77	5	2.105	2.306	1.455	0.217372	0.196479	0.791407	62.7	144.7	132.1	91.3	4.1	27.41	12.07	33.49	High	High	High	High	High	High	High	High
FALSE	High	Master Protein	NP_524688.1	macroglobulin complement-related [Drosophila melanogaster]	0	176.521	21	37	107	37	1	1760	202.7	6.47	3024	37	2.104	1.825	1.258	0.0260933	0.0526973	0.456743	69	125.8	145.1	86.8	1.04	16.64	6.4	10.83	High	High	High	High	High	High	High	High
FALSE	High	Master Protein	NP_001162848.1	drongo, isoform F [Drosophila melanogaster]	0.002	11.867	8	4	4	4	1	673	73.2	6.35	126	4	2.104	1.67	1.163	0.0434024	0.133261	0.96451	72	120.3	151.5	83.8	23.49	9.07	6.97	1.95	High	High	High	High	High	High	High	High
FALSE	High	Master Protein	NP_723479.1	protein kinase, cAMP-dependent, catalytic subunit 1, isoform B [Drosophila melanogaster]	0	64.12	36	18	36	18	1	353	40.8	8.69	642	18	2.104	1.645	1.723	0.0345227	0.110077	0.0949761	68	111.8	143	117.1	10.95	18.91	3.33	1.69	High	High	High	High	High	High	High	High
FALSE	High	Master Protein	NP_652018.1	cytochrome P450-6a17, isoform A [Drosophila melanogaster]	0	52.229	28	12	19	8	1	501	58.2	8.37	349	12	2.104	0.238	0.626	0.169294	0.0443118	0.508873	105.3	25.1	221.5	65.9	12.7	41.18	7.59	5.21	High	High	High	High	High	High	High	High
FALSE	High	Master Protein	NP_649581.1	MLF1-adaptor molecule, isoform A [Drosophila melanogaster]	0.006	5.642	3	2	2	2	1	637	70.5	5.12	40	2	2.104	1.95	1.651	0.194611	0.291831	0.500475	63.5	123.8	133.6	104.8	0.96	11.61	8.7	7.26	High	High	High	High	High	High	High	High
FALSE	High	Master Protein	NP_477075.2	short wing, isoform J [Drosophila melanogaster]	0	36.576	17	9	17	9	1	663	73.9	5.27	274	9	2.104	1.811	1.897	0.0218385	0.0365828	0.0391428	63.8	115.6	134.3	121.1	8.4	9.64	3.57	0.74	High	High	High	High	High	High	High	High
FALSE	High	Master Protein	NP_001263143.1	G protein-coupled receptor kinase 2, isoform B [Drosophila melanogaster]	0.002	10.941	6	4	5	4	1	714	80.6	6.35	46	4	2.102	1.639	1.949	0.261593	0.631137	0.3768	63.7	104.5	134	124.3	16.82	5.5	23.97	2.68	High	High	High	High	High	High	High	High
FALSE	Medium	Master Protein	NP_724760.2	uncharacterized protein Dmel_CG30345 [Drosophila melanogaster]	0.011	4.617	4	1	1	1	1	496	54.8	6.29	91	1	2.102	1.091	1.098	0.209405	1	1	83.3	90.9	175.2	91.5	16.07	16.82	4.88	17.8	High	High	High	High	High	High	High	High
FALSE	High	Master Protein	NP_573215.1	CG5613, isoform A [Drosophila melanogaster]	0.004	7.964	5	3	4	3	1	655	75.7	6.28	84	3	2.102	1.37	1.636	0.119597	0.731136	0.358475	71.2	97.6	149.7	116.5	8.29	1.53	33.74	3.64	High	High	High	High	High	High	High	High
FALSE	High	Master Protein	NP_996356.1	CG3842, isoform B [Drosophila melanogaster]	0	19.436	11	6	8	5	1	406	44.9	9.31	153	6	2.102	2.191	1.277	0.0894371	0.0982665	0.84683	64.3	140.9	135.1	82.1	11.98	0.94	11.24	20.63	High	High	High	High	High	High	High	High
FALSE	High	Master Protein	NP_477392.1	supercoiling factor, isoform A [Drosophila melanogaster]	0	93.03	51	18	51	18	1	329	38	4.69	1088	18	2.102	3.708	2.717	0.553242	0.206951	0.36661	48	177.9	100.8	130.4	8.77	51.89	14.29	50.06	High	High	High	High	High	High	High	High
FALSE	High	Master Protein	NP_001262544.1	flyers-cup, isoform F [Drosophila melanogaster]	0.008	5.219	4	2	2	2	1	802	91.1	6.37	35	2	2.101	2	2.13	0.423657	0.539047	0.458838	62.3	124.5	130.9	132.7	45.48	4.37	1.25	1.73	High	High	High	High	High	High	High	High
FALSE	High	Master Protein	NP_648923.1	nudC, isoform A [Drosophila melanogaster]	0	42.441	26	13	26	13	1	332	37.8	5.64	514	13	2.098	2.02	2.97	0.104015	0.144726	0.06032	54.5	110	114.3	161.8	9.16	14.58	15.19	22.11	High	High	High	High	High	High	High	High
FALSE	High	Master Protein	NP_608586.2	CG5001, isoform A [Drosophila melanogaster]	0.003	8.647	11	3	3	3	1	350	39.5	9.33	49	3	2.098	1.642	1.451	0.148128	0.419505	0.660963	69.8	114.6	146.5	101.3	1.18	14.44	26.46	0.08	High	High	High	High	High	High	High	High
FALSE	High	Master Protein	NP_525097.1	flightless I [Drosophila melanogaster]	0	17.915	6	6	7	6	1	1256	143.6	5.8	100	6	2.098	2.008	1.755	0.141935	0.197013	0.315294	64.9	130.2	136.1	113.8	6.5	12.7	2.58	30.88	High	High	High	High	High	High	High	High
FALSE	High	Master Protein	NP_649588.1	regulatory particle non-ATPase 5 [Drosophila melanogaster]	0	38.758	18	11	20	11	1	502	57.7	5.8	312	11	2.097	1.83	1.572	0.0495956	0.104917	0.2081	65.1	119.2	136.6	102.4	4.83	17.69	8.85	11.95	High	High	High	High	High	High	High	High
FALSE	High	Master Protein	NP_524877.1	comatose, isoform A [Drosophila melanogaster]	0	279.024	50	43	267	28	1	745	82.5	7.46	5312	43	2.097	1.633	2.092	0.0565668	0.194829	0.0812511	63	102.8	132	131.7	8.16	7.17	8.07	22.48	High	High	High	High	High	High	High	High
FALSE	High	Master Protein	NP_001260311.1	DNA replication-related element factor, isoform B [Drosophila melanogaster]	0.004	7.612	3	3	4	3	1	709	80.7	5.86	64	3	2.096	2.409	1.388	0.0536026	0.0468568	0.431907	58.6	141.1	122.8	81.3	4.59	3.79	0.4	14.71	High	High	High	High	High	High	High	High
FALSE	Medium	Master Protein	NP_729092.1	scrawny, isoform D [Drosophila melanogaster]	0.011	4.533	2	2	2	2	1	1038	114	9.09	55	2	2.095	2.594	2.053	0.204181	0.131714	0.252802	51.2	132.7	107.2	105.1	10.98	32.47	4.2	10.86	High	High	High	High	High	High	High	High
FALSE	High	Master Protein	NP_648306.1	cuticular protein 67B [Drosophila melanogaster]	0	18.109	18	5	8	5	1	260	29.8	5.11	196	5	2.095	1.488	2.203	0.695667	1	0.70912	57.9	86.2	121.4	127.6	30.68	49.82	39.13	55.8	High	High	High	High	High	High	High	High
FALSE	High	Master Protein	NP_001262266.1	uncharacterized protein Dmel_CG44088 [Drosophila melanogaster]	0.002	9.836	28	4	8	4	1	124	14	9.5	83	4	2.094	2.335	7.948	0.139552	0.122428	0.0240253	35.2	82.1	73.6	279.5	1.38	9.39	28.86	26.98	High	High	High	High	High	High	High	High
FALSE	High	Master Protein	NP_726426.1	tamo, isoform A [Drosophila melanogaster]	0.006	5.389	2	2	2	2	1	797	87.9	7.46	53	2	2.09	2.088	1.978	0.509156	0.568402	0.633057	58.6	122.2	122.4	115.8	33.56	9.2	16.95	23.97	High	High	High	High	High	High	High	High
FALSE	High	Master Protein	NP_650069.2	CG6723 [Drosophila melanogaster]	0.002	13.273	5	3	9	3	1	587	64.4	7.03	261	3	2.089	1.542	1.911	0.0289093	0.128957	0.0600275	66.2	102.1	138.4	126.6	12.89	2.84	11.25	0.55	High	High	High	High	High	High	High	High
FALSE	High	Master Protein	NP_996249.1	Na pump alpha subunit, isoform F [Drosophila melanogaster]	0	944.381	62	82	1949	1	1	1002	111.1	5.54	51177	82	2.088	1.543	1.798	0.0385544	0.17118	0.0888949	68.7	105.9	143.4	123.5	20.99	12.45	1.05	2.1	High	High	High	High	High	High	High	High
FALSE	High	Master Protein	NP_651868.1	uncharacterized protein Dmel_CG11334, isoform B [Drosophila melanogaster]	0	47.774	28	11	24	11	1	364	39.1	7.01	506	11	2.088	1.506	1.567	0.049928	0.260366	0.210435	70.5	106.3	147.3	110.6	7.34	21.46	11.9	10.01	High	High	High	High	High	High	High	High
FALSE	Low	Master Protein	NP_647956.2	CG4669 [Drosophila melanogaster]	0.059	2.228	1	1	1	1	1	611	70.1	5.08	29	1	2.087	2.282	4.012	0.131265	0.121522	0.0469802	48.8	111.3	101.8	195.6	25.26	11.59	0.52	10.89	High	High	High	High	High	High	High	High
FALSE	High	Master Protein	NP_523569.3	metabotropic GABA-B receptor subtype 1, isoform B [Drosophila melanogaster]	0	23.936	9	6	11	6	1	841	94.5	7.2	209	6	2.086	1.442	1.332	0.0366587	0.242372	0.397307	74.4	107.3	155.2	99.1	12.79	15.54	4.54	12.32	High	High	High	High	High	High	High	High
FALSE	High	Master Protein	NP_001014491.1	refractory to sigma P, isoform B [Drosophila melanogaster]	0	74.22	23	13	66	13	1	599	65.3	4.98	1520	13	2.085	0.942	2.94	0.213756	1	0.109459	56.1	52.9	117	165.1	3.31	11.75	8.59	0.74	High	High	High	High	High	High	High	High
FALSE	High	Master Protein	NP_523994.1	heat shock gene 67Bc [Drosophila melanogaster]	0	28.923	36	5	17	5	1	199	22.2	6.58	380	5	2.085	2.018	1.985	0.114106	0.153768	0.167589	61	123	127.1	121	5.68	10.56	7.32	14.17	High	High	High	High	High	High	High	High
FALSE	High	Master Protein	NP_572294.2	raptor, isoform B [Drosophila melanogaster]	0	32.051	7	9	12	9	1	1621	177.1	8.28	319	9	2.084	1.617	1.622	0.198056	0.53699	0.525595	63.5	102.8	132.5	103.1	0.64	10.83	14.34	19.46	High	High	High	High	High	High	High	High
FALSE	High	Master Protein	NP_001027219.1	glycogen phosphorylase, isoform B [Drosophila melanogaster]	0	235.196	47	46	174	46	1	844	96.9	6.52	2701	46	2.084	1.399	1.438	0.22656	0.884199	0.82104	73.9	103.3	153.9	106.2	0.8	41.29	0.37	13.26	High	High	High	High	High	High	High	High
FALSE	Medium	Master Protein	NP_609111.1	gudu [Drosophila melanogaster]	0.038	2.777	3	1	1	1	1	669	73.1	5.78	0	1	2.083	2.157	2.2	0.121642	0.131714	0.132578	57.2	123.4	119.2	125.9	10.24	1.27	29.89	4.81	High	High	High	High	High	High	High	High
FALSE	High	Master Protein	NP_001027412.1	uncharacterized protein Dmel_CG33671, isoform A [Drosophila melanogaster]	0.002	10.258	8	3	3	3	1	390	42.4	6.24	117	3	2.083	1.95	1.947	0.111259	0.168493	0.172149	63.6	124	132.5	123.9	21.52	29.37	0.52	4.47	High	High	High	High	High	High	High	High
FALSE	High	Master Protein	NP_651392.2	NADH dehydrogenase (ubiquinone) 49 kDa subunit-like [Drosophila melanogaster]	0	15.524	9	4	7	3	1	523	60.1	7.01	102	4	2.082	1.546	2.936	0.206241	0.634622	0.104212	60.4	93.4	125.7	177.3	9.81	40.07	14.05	7.89	High	High	High	High	High	High	High	High
FALSE	High	Master Protein	NP_524664.1	spaghetti [Drosophila melanogaster]	0	22.739	13	6	11	6	1	534	59.6	8.34	253	6	2.082	2.167	3.211	0.408218	0.418347	0.175958	51.3	111.2	106.8	164.8	13.01	7.77	4.29	6.3	High	High	High	High	High	High	High	High
FALSE	High	Master Protein	NP_524024.1	salivary gland secretion 3 [Drosophila melanogaster]	0.004	7.849	4	1	2	1	1	307	32.2	9.89	67	1	2.08	2.508	1.523	0.155324	0.107845	0.561581	60.2	151	125.2	91.7	24.51	32.16	4.9	4.54	High	High	High	High	High	High	High	High
FALSE	Low	Master Protein	NP_610837.1	CG3955 [Drosophila melanogaster]	0.064	2.113	3	1	1	1	1	201	22.1	8.06	44	1	2.076	1.975	1.645	0.579162	0.703521	0.935698	60.9	120.3	126.4	100.2	4	15.32	3.49	13.62	High	High	High	High	High	High	High	High
FALSE	Low	Master Protein	NP_476656.1	neither inactivation nor afterpotential A [Drosophila melanogaster]	0.054	2.299	3	1	1	1	1	237	26.3	7.06	40	1	2.074	1.21	1.634	0.0452898	0.819937	0.155085	73.3	88.7	152	119.8	7.07	12.13	17.58	11.48	High	High	High	High	High	High	High	High
FALSE	High	Master Protein	NP_649969.1	CG3909 [Drosophila melanogaster]	0.004	7.585	10	2	3	2	1	331	36.1	5.25	76	2	2.073	1.405	1.428	0.425047	1	1	68.7	96.6	142.5	98.1	21.29	11.86	37.9	39.68	High	High	High	High	High	High	High	High
FALSE	High	Master Protein	NP_647670.3	uncharacterized protein Dmel_CG12024, isoform A [Drosophila melanogaster]	0	23.5	17	6	11	6	1	292	32.5	5.99	174	6	2.073	2.078	1.846	0.168379	0.197013	0.292509	60.7	126	125.7	112	7.42	6.56	2.79	11.47	High	High	High	High	High	High	High	High
FALSE	High	Master Protein	NP_524335.1	yellow-f, isoform A [Drosophila melanogaster]	0.008	5.271	4	2	3	1	1	429	49.1	7.31	76	2	2.073	1.916	1.117	0.0535946	0.0916751	1	72.6	139.1	150.6	81.1	12.22	0.71	2.46	23.76	High	High	High	High	High	High	High	High
FALSE	High	Master Protein	NP_001286937.1	Src oncogene at 64B, isoform K [Drosophila melanogaster]	0	36.798	20	11	21	11	1	553	63.1	6.99	314	11	2.072	1.883	1.555	0.0225584	0.040195	0.0935116	66.5	125.3	137.9	103.5	2.56	4.11	1.98	9.86	High	High	High	High	High	High	High	High
FALSE	High	Master Protein	NP_477008.1	translocation protein 1, isoform A [Drosophila melanogaster]	0	116.824	34	19	64	19	1	415	47	6.18	1332	19	2.07	1.648	2.273	0.0617818	0.194865	0.0663528	62.2	102.5	128.7	141.4	3.03	8.09	1.54	11.06	High	High	High	High	High	High	High	High
FALSE	High	Master Protein	NP_610360.2	CG8708, isoform D [Drosophila melanogaster]	0.003	8.339	6	3	4	3	1	450	51.8	6.61	79	3	2.07	1.317	2.236	0.12258	0.836108	0.123618	64.6	85.1	133.7	144.5	7.7	16.78	25	3.11	High	High	High	High	High	High	High	High
FALSE	High	Master Protein	NP_995868.1	Rho guanine nucleotide exchange factor 2, isoform F [Drosophila melanogaster]	0	29.551	4	10	13	10	1	2559	280.6	6.77	212	10	2.069	2.243	1.79	0.13957	0.13103	0.277387	59.8	134.1	123.8	107	16.41	2.34	1.19	6.7	High	High	High	High	High	High	High	High
FALSE	High	Master Protein	NP_726414.3	yorkie, isoform G [Drosophila melanogaster]	0.001	15.455	17	4	4	4	1	395	43.6	5.41	145	4	2.069	2.119	1.793	0.416981	0.443703	0.656191	60.5	128.2	125.1	108.5	30.49	14.43	9.85	6.77	High	High	High	High	High	High	High	High
FALSE	High	Master Protein	NP_001260638.1	CG9319, isoform B [Drosophila melanogaster]	0	51.824	32	11	26	11	1	373	41.6	6.55	620	11	2.068	1.035	1.351	0.120699	1	0.755795	77.3	80	159.8	104.3	20.09	9.4	9.46	29.81	High	High	High	High	High	High	High	High
FALSE	High	Master Protein	NP_729787.2	neurexin IV, isoform B [Drosophila melanogaster]	0	97.681	15	22	58	22	1	1284	145	6.51	1143	22	2.067	1.62	1.14	0.0218385	0.0582181	0.786355	73.5	119.1	152	83.8	1.04	12.67	7.9	1.14	High	High	High	High	High	High	High	High
FALSE	High	Master Protein	NP_001261395.1	wishful thinking, isoform B [Drosophila melanogaster]	0.006	6.136	2	2	2	2	1	913	101.4	6.83	76	2	2.067	1.5	1.421	0.0485384	0.251889	0.335293	68.9	103.4	142.5	98	11.47	13.5	2.7	12.88	High	High	High	High	High	High	High	High
FALSE	High	Master Protein	NP_726368.2	CG4797 [Drosophila melanogaster]	0.005	6.981	4	2	2	2	1	533	59.1	8.75	47	2	2.067	1.565	1.691	0.0254938	0.0982798	0.0746175	67	104.9	138.5	113.4	5.95	7.22	4.37	0.28	High	High	High	High	High	High	High	High
FALSE	High	Master Protein	NP_652729.2	HBS1, isoform A [Drosophila melanogaster]	0	33.752	14	8	15	8	1	670	74.1	6.7	407	8	2.066	1.7	1.811	0.033548	0.0872198	0.0731235	64	108.9	132.3	115.9	6.78	6.93	2.6	0.57	High	High	High	High	High	High	High	High
FALSE	High	Master Protein	NP_610504.4	CG1827 [Drosophila melanogaster]	0	16.447	9	4	15	4	1	393	42.2	8.43	189	4	2.066	1.457	1.725	0.524084	1	0.824064	67.9	98.9	140.2	117	7.59	23.32	12.2	17.52	High	High	High	High	High	High	High	High
FALSE	High	Master Protein	NP_648615.1	uncharacterized protein Dmel_CG10748 [Drosophila melanogaster]	0.002	12.724	12	4	4	4	1	349	36.8	7.53	109	4	2.066	3	4.625	0.123361	0.05514	0.03769	41.9	125.8	86.6	194	2.26	2.91	10.44	0.05	High	High	High	High	High	High	High	High
FALSE	High	Master Protein	NP_001137835.2	inwardly rectifying potassium channel 3, isoform D [Drosophila melanogaster]	0	21.878	13	6	14	1	1	446	50.9	7.44	285	6	2.065	1.104	1.768	0.352072	1	0.598072	71.5	78.9	147.6	126.4	37.06	42.95	6.67	5.92	High	High	High	High	High	High	High	High
FALSE	High	Master Protein	NP_001097981.1	uncharacterized protein Dmel_CG15537, isoform B [Drosophila melanogaster]	0.008	5.347	6	2	2	2	1	353	38.1	6.43	32	2	2.064	1.703	1.894	0.0804517	0.211527	0.144487	63.4	107.9	130.8	120	20.88	15.9	9.72	2.57	High	High	High	High	High	High	High	High
FALSE	High	Master Protein	NP_723346.2	basigin, isoform G [Drosophila melanogaster]	0	181.26	36	26	163	9	1	648	70.5	6.89	4051	26	2.064	1.394	1.687	0.0224354	0.168152	0.0649011	70.9	98.8	146.3	119.5	8.91	7.36	9.86	4.52	High	High	High	High	High	High	High	High
FALSE	High	Master Protein	NP_649090.1	uncharacterized protein Dmel_CG10424 [Drosophila melanogaster]	0.006	6.327	6	2	6	2	1	300	32.1	7.44	176	2	2.063	1.579	1.527	0.0250391	0.0930523	0.118094	70.8	111.8	146.1	108.1	6.49	9.63	7.87	7.37	High	High	High	High	High	High	High	High
FALSE	High	Master Protein	NP_001036316.1	stoned A, isoform C [Drosophila melanogaster]	0	52.195	19	15	23	15	1	850	93.1	4.56	468	15	2.063	1.853	1.654	0.215108	0.355641	0.513847	64	118.7	132.1	105.9	2.92	15.28	12.44	19.45	High	High	High	High	High	High	High	High
FALSE	High	Master Protein	NP_001027395.1	serpin 43Ab [Drosophila melanogaster]	0	145.255	69	25	110	25	1	393	43.4	8.41	2615	25	2.062	1.71	1.123	0.0367544	0.095341	1	71.4	122	147.2	80.1	7.55	2.84	13.57	17.74	High	High	High	High	High	High	High	High
FALSE	High	Master Protein	NP_608336.1	uncharacterized protein Dmel_CG12237 [Drosophila melanogaster]	0.002	12.077	11	2	5	2	1	306	34.6	7.72	131	2	2.062	2.41	1.931	0.0359357	0.0356249	0.0648434	56.8	136.8	117	109.6	7.71	12.83	11.61	4.07	High	High	High	High	High	High	High	High
FALSE	High	Master Protein	NP_649207.1	serpin 77Bc, isoform A [Drosophila melanogaster]	0	28.962	13	5	15	1	1	416	47.1	7.08	345	5	2.062	3.843	20.285	0.49436	0.154269	0.0356485	17.3	66.3	35.6	350.1	21.46	15.74	7.89	14.45	High	High	High	High	High	High	High	High
FALSE	High	Master Protein	NP_001246349.1	CG8249, isoform B [Drosophila melanogaster]	0.002	14.046	9	4	7	4	1	521	57.7	8.6	204	4	2.06	1.89	2.206	0.102615	0.170182	0.1088	62.3	117.8	128.4	137.5	4.38	3.97	1.03	7.37	High	High	High	High	High	High	High	High
FALSE	High	Master Protein	NP_649451.1	vacuolar protein sorting 24, isoform A [Drosophila melanogaster]	0	42.599	43	10	41	10	1	223	25.3	5.11	1348	10	2.058	2.349	1.366	0.0664046	0.0565026	0.524894	64.4	151.3	132.5	87.9	0.81	8.06	16.79	20.64	High	High	High	High	High	High	High	High
FALSE	High	Master Protein	NP_001259865.1	CG5397, isoform B [Drosophila melanogaster]	0	22.712	10	7	15	7	1	665	70.9	6.9	209	7	2.057	1.789	1.526	0.0483635	0.105102	0.221865	68.8	123.1	141.5	105	3.04	2.51	5.14	21.52	High	High	High	High	High	High	High	High
FALSE	Low	Master Protein	NP_572704.1	CG1657 [Drosophila melanogaster]	0.05	2.399	1	2	2	2	1	1712	191.1	5.76	16	2	2.056	2.175	1.358	0.058771	0.0630831	0.49101	63.5	138.2	130.7	86.3	11.98	24.94	3.98	6.41	High	High	High	High	High	High	High	High
FALSE	High	Master Protein	NP_722663.1	arouser, isoform A [Drosophila melanogaster]	0	18.667	9	6	10	6	1	805	88.2	6.89	277	6	2.056	2.034	1.288	0.0818512	0.107742	0.771771	66.2	134.7	136.1	85.3	5.61	16.87	3.78	15.82	High	High	High	High	High	High	High	High
FALSE	High	Master Protein	NP_570011.1	eIF3g paralogue a [Drosophila melanogaster]	0	43.935	30	7	27	6	1	269	29.9	8.79	666	7	2.056	2.158	1.872	0.244942	0.250064	0.376964	59	127.4	121.4	110.5	4.48	3.88	3.87	4.86	High	High	High	High	High	High	High	High
FALSE	High	Master Protein	NP_730535.1	presenilin, isoform B [Drosophila melanogaster]	0	34.288	16	6	19	6	1	527	57.8	6.55	772	6	2.055	2.058	1.875	0.0275163	0.0368893	0.0587042	59.7	122.8	122.6	111.9	0.37	6.76	13.08	14.64	High	High	High	High	High	High	High	High
FALSE	High	Master Protein	NP_523815.2	nahoda, isoform A [Drosophila melanogaster]	0	140.056	35	34	64	34	1	1335	149.8	5.68	1257	34	2.054	1.978	1.436	0.165574	0.22345	0.699456	65.4	129.5	134.4	94	3.55	19.05	2.44	26.15	High	High	High	High	High	High	High	High
FALSE	High	Master Protein	NP_001246537.1	UDP-galactose 4'-epimerase, isoform B [Drosophila melanogaster]	0	33.334	25	8	14	8	1	350	38.7	7.46	157	8	2.05	1.649	1.524	0.193466	0.479181	0.617688	71.4	117.7	146.4	108.8	6.72	35.42	14.66	0.4	High	High	High	High	High	High	High	High
FALSE	High	Master Protein	NP_511143.2	brahma associated protein 60kD [Drosophila melanogaster]	0.003	9.162	7	3	3	3	1	515	58.1	9.32	84	3	2.05	1.991	1.85	0.286581	0.362182	0.4452	57.8	115	118.4	106.9	22.34	29.77	21.33	10.52	High	High	High	High	High	High	High	High
FALSE	High	Master Protein	NP_649496.3	circadian trip, isoform A [Drosophila melanogaster]	0.002	15.197	2	5	5	5	1	3140	336.4	7.25	161	5	2.049	1.833	1.809	0.0664046	0.128957	0.14249	61.7	113.1	126.3	111.6	4.8	9.1	7.87	19.75	High	High	High	High	High	High	High	High
FALSE	High	Master Protein	NP_523400.1	coat protein (coatomer) beta [Drosophila melanogaster]	0	102.906	21	18	74	18	1	964	107.3	6.32	1503	18	2.048	1.82	1.473	0.0402815	0.0794599	0.21858	68.1	124	139.5	100.3	6.43	16.15	16.21	5.65	High	High	High	High	High	High	High	High
FALSE	High	Master Protein	NP_001247399.1	hephaestus, isoform Y [Drosophila melanogaster]	0	25.032	5	5	10	5	1	898	95.7	8.97	220	5	2.047	2.239	3.321	0.145175	0.131714	0.06032	50.7	113.4	103.7	168.3	5.22	9.86	16.32	24.64	High	High	High	High	High	High	High	High
FALSE	High	Master Protein	NP_608578.1	CG5080, isoform B [Drosophila melanogaster]	0	73.264	35	20	44	20	1	554	61.2	5.62	870	20	2.046	1.845	1.984	0.0216142	0.0356249	0.0300261	64	118.2	131	127	9.21	8.14	0.45	6.62	High	High	High	High	High	High	High	High
FALSE	High	Master Protein	NP_001284806.1	cytochrome P450-4d2, isoform B [Drosophila melanogaster]	0	52.391	19	12	27	11	1	501	57.9	8.16	414	12	2.045	1.511	1.923	0.0838008	0.368961	0.139893	68.5	103.5	140.1	131.7	14.54	24.85	4.56	7.7	High	High	High	High	High	High	High	High
FALSE	High	Master Protein	NP_001284773.1	uncharacterized protein Dmel_CG12773, isoform C [Drosophila melanogaster]	0	20.881	10	7	11	7	1	712	77.8	5.74	225	7	2.045	2.178	1.656	0.043872	0.0467759	0.137995	62.1	135.2	126.9	102.8	16.68	10.3	4.85	4.15	High	High	High	High	High	High	High	High
FALSE	High	Master Protein	NP_650105.1	CG6908, isoform A [Drosophila melanogaster]	0.005	6.687	5	3	3	3	1	449	51.8	5.68	30	3	2.044	1.755	2.476	0.0676776	0.153776	0.0600275	61.6	108.2	126	152.6	1.35	1.9	17.28	24.94	High	High	High	High	High	High	High	High
FALSE	High	Master Protein	NP_001303415.1	uncharacterized protein Dmel_CG45782 [Drosophila melanogaster]	0.002	12.658	5	4	5	4	1	615	68	6.32	76	4	2.044	1.686	1.391	0.145036	0.349166	0.72795	68.6	115.7	140.3	95.5	19.8	14.4	3.36	22.03	High	High	High	High	High	High	High	High
FALSE	High	Master Protein	NP_731919.1	uncharacterized protein Dmel_CG31313, isoform A [Drosophila melanogaster]	0.002	11.666	22	3	6	3	1	124	13.5	5.54	126	3	2.043	2.511	1.728	0.0247781	0.0280995	0.0649011	59.7	149.9	121.9	103.1	1.6	13.82	3.29	2.19	High	High	High	High	High	High	High	High
FALSE	High	Master Protein	NP_729555.4	uncharacterized protein Dmel_CG32052, isoform C [Drosophila melanogaster]	0.006	5.679	4	2	3	2	1	509	57.8	6.74	63	2	2.042	2.024	2.027	0.127065	0.15875	0.162172	59.7	120.9	122	121.1	21.68	2.83	3.05	21.75	High	High	High	High	High	High	High	High
FALSE	Low	Master Protein	NP_648920.1	CG9705, isoform A [Drosophila melanogaster]	0.086	1.733	5	1	2	1	1	143	15.8	8.47	33	1	2.042	2.11	1.824	0.676528	0.707631	0.876154	54.8	115.7	111.9	100	35.91	39.04	17.56	16.39	High	High	High	High	High	High	High	High
FALSE	Medium	Master Protein	NP_610827.2	uncharacterized protein Dmel_CG17019, isoform A [Drosophila melanogaster]	0.032	3.015	2	1	2	1	1	700	77.1	5.77	37	1	2.042	2.31	1.845	0.174048	0.141713	0.289666	61.1	141.1	124.7	112.7	29.47	4.21	17.94	2.66	High	High	High	High	High	High	High	High
FALSE	High	Master Protein	NP_001246303.1	straightjacket, isoform C [Drosophila melanogaster]	0	23.695	5	6	9	6	1	1271	145.7	6.68	188	6	2.041	1.487	1.542	0.0971881	0.438074	0.367249	70.7	105.2	144.4	109	15.01	29	6.09	9.24	High	High	High	High	High	High	High	High
FALSE	High	Master Protein	NP_001286613.1	Calpain-A, isoform D [Drosophila melanogaster]	0	101.201	31	21	67	19	1	843	95.6	4.96	1685	21	2.039	1.581	1.499	0.0197339	0.0440931	0.0648434	69.4	109.7	141.4	104	2.82	11.76	2.11	5.6	High	High	High	High	High	High	High	High
FALSE	High	Master Protein	NP_476814.1	18 wheeler [Drosophila melanogaster]	0	21.517	5	6	9	6	1	1385	154.7	6.46	254	6	2.039	1.487	1.347	0.144725	0.564263	0.806384	72.1	107.1	146.9	97.1	24.21	3.75	0	6.35	High	High	High	High	High	High	High	High
FALSE	High	Master Protein	NP_610059.1	CG9328, isoform A [Drosophila melanogaster]	0	15.766	27	5	9	5	1	180	20.1	8.16	235	5	2.034	2.011	1.805	0.41292	0.482246	0.618066	59	118.7	120.1	106.5	1.97	52.24	19.57	18.39	High	High	High	High	High	High	High	High
FALSE	High	Master Protein	NP_001260128.1	cytochrome P450 reductase, isoform C [Drosophila melanogaster]	0	310.569	52	47	375	47	1	679	76.3	5.9	6060	47	2.032	1.027	1.903	0.0609045	1	0.104256	74.6	76.6	151.5	141.9	8.7	15.36	6.06	10.21	High	High	High	High	High	High	High	High
FALSE	High	Master Protein	NP_608818.4	CG3714, isoform B [Drosophila melanogaster]	0	39.366	18	10	16	10	1	667	73.9	7.24	423	10	2.031	1.961	1.644	0.106726	0.146226	0.292527	65.9	129.3	133.9	108.4	14.35	17.14	6.69	3.64	High	High	High	High	High	High	High	High
FALSE	High	Master Protein	NP_001033805.1	phosphatidylinositol 5-phosphate 4-kinase, isoform B [Drosophila melanogaster]	0.002	15.338	8	3	10	3	1	404	47	7.37	276	3	2.031	1.443	1.765	0.0224354	0.127433	0.0562368	69.9	101	142.1	123.5	8.28	16.06	1.58	2.5	High	High	High	High	High	High	High	High
FALSE	High	Master Protein	NP_523899.1	heat shock protein 83, isoform A [Drosophila melanogaster]	0	410.877	64	61	380	58	1	717	81.8	5.02	6898	61	2.029	1.537	1.768	0.174122	0.553381	0.328988	69.1	106.1	140.2	122.1	10.03	28.91	0.42	18.35	High	High	High	High	High	High	High	High
FALSE	High	Master Protein	NP_727968.1	CG9992, isoform A [Drosophila melanogaster]	0	18.532	14	5	6	5	1	322	34.7	7.12	97	5	2.029	2.019	2.099	0.271623	0.320205	0.285871	55.3	111.6	112.1	116	2.06	8.03	12.17	22.52	High	High	High	High	High	High	High	High
FALSE	High	Master Protein	NP_610299.2	vacuolar protein sorting 13, isoform A [Drosophila melanogaster]	0	239.365	18	62	125	62	1	3321	374.3	5.85	2350	62	2.028	1.481	1.35	0.0348672	0.175595	0.317357	71.8	106.3	145.6	96.9	4.04	20.09	1.64	8.31	High	High	High	High	High	High	High	High
FALSE	High	Master Protein	NP_650086.2	multidrug resistance protein 4 [Drosophila melanogaster]	0	91.664	15	17	50	10	1	1316	147.8	7.59	1221	17	2.027	1.295	1.3	0.0381761	0.462348	0.445755	76.8	99.5	155.6	99.9	2.42	16.02	6.35	15.71	High	High	High	High	High	High	High	High
FALSE	High	Master Protein	NP_611562.2	uncharacterized protein Dmel_CG44245, isoform A [Drosophila melanogaster]	0	138.4	55	23	72	23	1	436	49.2	6.24	2192	23	2.026	2.494	1.104	0.152246	0.0989932	1	62.7	156.4	127.1	69.2	8.28	12.65	21.61	14.44	High	High	High	High	High	High	High	High
FALSE	High	Master Protein	NP_001246877.1	CG7470, isoform B [Drosophila melanogaster]	0	269.901	47	45	270	45	1	776	84	6.73	4846	45	2.026	1.568	1.467	0.044631	0.169388	0.24557	73.8	115.7	149.5	108.3	2.19	4.17	19.6	15.47	High	High	High	High	High	High	High	High
FALSE	High	Master Protein	NP_649939.1	CG8412 [Drosophila melanogaster]	0	31.41	8	7	12	7	1	678	76.5	8.82	308	7	2.026	1.454	1.431	0.0958608	0.474467	0.504334	70.8	102.9	143.3	101.2	13.77	17.39	3.79	19.94	High	High	High	High	High	High	High	High
FALSE	High	Master Protein	NP_477064.1	peanut, isoform A [Drosophila melanogaster]	0	107.672	47	24	52	23	1	539	60.1	8.75	1182	24	2.025	1.826	2.009	0.0495433	0.095063	0.0732086	62.1	113.4	125.8	124.8	10.9	3.46	6.82	11.04	High	High	High	High	High	High	High	High
FALSE	Low	Master Protein	NP_727535.1	CG1572, isoform B [Drosophila melanogaster]	0.113	1.376	5	1	1	1	1	160	17.8	9.01	27	1	2.024	2.131	2.167	0.11783	0.122428	0.121843	58.3	124.2	118	126.3	9.09	4.4	0.93	4.89	High	High	High	High	High	High	High	High
FALSE	High	Master Protein	NP_651224.1	CG5510 [Drosophila melanogaster]	0.002	13.499	9	3	12	3	1	329	37.6	6.87	233	3	2.024	1.823	1.995	0.20327	0.334472	0.248431	60.7	110.7	122.9	121.1	9.92	14.52	5.63	19.31	High	High	High	High	High	High	High	High
FALSE	High	Master Protein	NP_001261167.1	regulatory particle non-ATPase 8, isoform B [Drosophila melanogaster]	0	43.283	29	9	29	9	1	358	40.7	8.98	751	9	2.02	1.562	1.513	0.11666	0.384356	0.440942	69.9	109.3	141.3	105.8	6.59	34.05	6.2	8.86	High	High	High	High	High	High	High	High
FALSE	High	Master Protein	NP_728141.1	wings up A, isoform A [Drosophila melanogaster]	0	137.337	61	25	113	11	1	208	24.5	9.74	1966	25	2.02	2.514	0.955	0.173032	0.107742	1	65.9	165.7	133.1	63	1.29	18.74	31.1	6.64	High	High	High	High	High	High	High	High
FALSE	High	Master Protein	NP_649754.1	CG2781 [Drosophila melanogaster]	0.002	10.878	5	2	5	2	1	329	38.3	9.47	98	2	2.019	1.959	1.97	0.0323951	0.044492	0.0550427	62.4	122.2	126	122.9	1.76	8.38	1.77	0.74	High	High	High	High	High	High	High	High
FALSE	High	Master Protein	NP_651081.1	cardinal [Drosophila melanogaster]	0.002	9.82	4	2	3	2	1	830	92.8	6.77	51	2	2.018	1.909	1.587	0.204594	0.287008	0.535903	65.3	124.7	131.8	103.7	8.06	0.08	13.83	7.85	High	High	High	High	High	High	High	High
FALSE	High	Master Protein	NP_726379.1	kazachoc, isoform B [Drosophila melanogaster]	0	188.444	25	31	150	3	1	1028	114	7.11	2858	31	2.018	1.697	1.579	0.212591	0.44454	0.567	67.2	114	135.6	106	17.46	1.07	25.05	34.03	High	High	High	High	High	High	High	High
FALSE	High	Master Protein	NP_733371.1	prolyl-4-hydroxylase-alpha EFB [Drosophila melanogaster]	0	76.387	34	16	48	16	1	550	63.1	5.48	1035	16	2.017	2.013	1.767	0.222886	0.264606	0.401313	66.5	134	134.2	117.6	5.64	13.48	3.96	42.94	High	High	High	High	High	High	High	High
FALSE	High	Master Protein	NP_722774.1	papi, isoform B [Drosophila melanogaster]	0	66.772	31	18	42	18	1	576	63.8	6.3	652	18	2.016	1.528	1.958	0.0174167	0.0424743	0.0238667	66.4	101.4	133.8	129.9	7.66	9.01	3.73	1.81	High	High	High	High	High	High	High	High
FALSE	Medium	Master Protein	NP_611600.1	CG9865, isoform A [Drosophila melanogaster]	0.011	4.538	3	1	4	1	1	466	54.1	9.28	138	1	2.016	1.424	1.832	0.0444771	0.286221	0.0863995	67.7	96.4	136.5	124	15.12	17.72	8.5	4.26	High	High	High	High	High	High	High	High
FALSE	Medium	Master Protein	NP_727674.1	uncharacterized protein Dmel_CG32640 [Drosophila melanogaster]	0.011	4.569	11	1	1	1	1	132	14.8	9.03	75	1	2.016	0.806	1.894	0.0204625	0.249927	0.0302903	72.8	58.7	146.7	137.9	0.56	7.17	7.52	1.24	High	High	High	High	High	High	High	High
FALSE	High	Master Protein	NP_001259464.1	Cyp28c1, isoform B [Drosophila melanogaster]	0.002	11.401	8	3	4	3	1	505	57.4	8.15	108	3	2.015	2.387	2.554	0.205667	0.145095	0.130308	54.5	130.1	109.8	139.1	36.13	14.85	4.4	4.65	High	High	High	High	High	High	High	High
FALSE	High	Master Protein	NP_724087.1	neither inactivation nor afterpotential D, isoform A [Drosophila melanogaster]	0	26.059	20	7	9	7	1	513	57.7	5	210	7	2.013	2.281	1.581	0.616713	0.545452	0.98333	65.3	149	131.5	103.3	11.67	30.26	6.88	43.54	High	High	High	High	High	High	High	High
FALSE	Low	Master Protein	NP_477211.1	Ras-related protein interacting with calmodulin, isoform A [Drosophila melanogaster]	0.072	1.933	3	1	1	1	1	264	30	8.75	25	1	2.011	1.587	1.551	0.0173867	0.0356249	0.0469802	68	108	136.8	105.5	2.82	5.3	0.92	5.29	High	High	High	High	High	High	High	High
FALSE	High	Master Protein	NP_727578.3	uncharacterized protein Dmel_CG10353, isoform D [Drosophila melanogaster]	0	26.457	11	8	12	8	1	1029	117.7	7.87	310	8	2.01	1.657	1.5	0.0870093	0.23678	0.368377	68.6	113.6	137.8	102.8	7.72	17.39	20.97	9.01	High	High	High	High	High	High	High	High
FALSE	High	Master Protein	NP_572826.1	ade5, isoform A [Drosophila melanogaster]	0	89.843	38	20	60	20	1	429	47.3	8.07	1323	20	2.009	1.512	2.039	0.223286	0.668069	0.250313	68.5	103.6	137.7	139.7	9.1	36.73	7.97	14.55	High	High	High	High	High	High	High	High
FALSE	High	Master Protein	NP_723087.1	uncharacterized protein Dmel_CG31915 [Drosophila melanogaster]	0	16.557	7	4	6	4	1	612	71.1	5.4	30	4	2.008	1.76	1.641	0.0766126	0.161602	0.218482	69.8	122.9	140.1	114.6	4.95	15.94	18.46	18.55	High	High	High	High	High	High	High	High
FALSE	High	Master Protein	NP_729087.1	ubiquitin specific protease 47, isoform A [Drosophila melanogaster]	0	20.106	4	7	9	7	1	1556	173.7	5.64	146	7	2.006	1.977	2.096	0.131311	0.166614	0.143645	60.7	119.9	121.7	127.1	4.35	6.09	6.55	4.54	High	High	High	High	High	High	High	High
FALSE	Low	Master Protein	NP_608540.1	CG2839 [Drosophila melanogaster]	0.09	1.653	1	1	2	1	1	826	106	9	0	1	2.006	2.425	0.936	0.412337	0.291107	1	66.8	162	134	62.5	36.36	37.19	22.03	4.16	High	High	High	High	High	High	High	High
FALSE	High	Master Protein	NP_729406.1	paramyosin, isoform C [Drosophila melanogaster]	0	210.992	54	39	113	1	1	640	74.2	9.2	3488	39	2.005	2.08	1.33	0.0360655	0.0421331	0.351622	65	135.1	130.2	86.4	0.93	11.77	13.54	8.8	High	High	High	High	High	High	High	High
FALSE	High	Master Protein	NP_610324.2	Nop17 like, isoform A [Drosophila melanogaster]	0.002	10.467	9	4	12	4	1	834	94.7	6.34	43	4	2.005	1.888	2.598	0.207901	0.298562	0.123573	60.1	113.5	120.5	156.2	41.19	2.18	7.55	9.91	High	High	High	High	High	High	High	High
FALSE	High	Master Protein	NP_573003.2	Cyp4s3 [Drosophila melanogaster]	0	65.821	28	15	33	15	1	495	57.2	8.82	646	15	2.005	2.296	3.114	0.152099	0.121073	0.0649011	54.2	124.4	108.6	168.7	2.45	2.59	20.39	32.19	High	High	High	High	High	High	High	High
FALSE	High	Master Protein	NP_001261373.1	Ecdysone-induced protein 63E, isoform N [Drosophila melanogaster]	0.002	14.762	9	5	7	4	1	538	61.6	8.73	131	5	2.004	1.787	1.491	0.182127	0.318994	0.612237	67.9	121.3	136	101.3	3.28	23.07	4.94	23.36	High	High	High	High	High	High	High	High
FALSE	High	Master Protein	NP_477258.1	imaginal disc growth factor 1 [Drosophila melanogaster]	0	34.736	21	10	15	10	1	439	49.3	7.25	310	10	2.004	1.431	2.719	0.0218385	0.10969	0.0211824	62.1	88.9	124.4	168.9	2.21	15.74	2.95	1.87	High	High	High	High	High	High	High	High
FALSE	High	Master Protein	NP_649104.1	glycogen binding subunit 76A, isoform A [Drosophila melanogaster]	0.002	12.838	6	3	4	3	1	681	73.9	4.61	103	3	2.002	2.97	2.628	0.293891	0.123766	0.167305	46.1	136.9	92.3	121.1	2.34	21.46	26.33	16.53	High	High	High	High	High	High	High	High
FALSE	High	Master Protein	NP_649233.2	zinc transporter 77C, isoform A [Drosophila melanogaster]	0.008	5.005	4	2	3	2	1	513	56.9	6.9	68	2	2.002	1.991	2.675	0.164834	0.198192	0.0900512	57.8	115.1	115.7	154.6	22.23	10.19	6.26	3.93	High	High	High	High	High	High	High	High
FALSE	High	Master Protein	NP_001137778.2	fatty acid synthase 1, isoform C [Drosophila melanogaster]	0	545.66	41	98	346	97	1	2540	277.8	6.65	8091	98	2.001	1.08	1.824	0.091496	1	0.166002	75.2	81.2	150.5	137.1	8.57	15.02	27.79	4.87	High	High	High	High	High	High	High	High
FALSE	Medium	Master Protein	NP_001260431.1	DnaJ homolog, isoform C [Drosophila melanogaster]	0.017	4.19	6	2	4	2	1	440	50	6.14	36	2	2.001	1.667	2.216	0.0821988	0.215258	0.0819987	62.8	104.7	125.6	139.1	7.98	29.05	6.53	7.01	High	High	High	High	High	High	High	High
FALSE	High	Master Protein	NP_573023.2	scamp, isoform A [Drosophila melanogaster]	0	22.179	15	5	20	4	1	343	38.5	5.19	212	5	2	1.617	1.603	0.0242586	0.0718928	0.0811705	69.2	112	138.5	111	3.73	11.82	8.64	0.12	High	High	High	High	High	High	High	High
FALSE	High	Master Protein	NP_609124.3	CG6441, isoform A [Drosophila melanogaster]	0.004	7.621	7	4	6	4	1	558	62	8.57	50	4	2	2.094	4.63	0.093786	0.100504	0.0286776	47.9	100.3	95.8	221.9	15.29	14.72	11.98	10.43	High	High	High	High	High	High	High	High
FALSE	High	Master Protein	NP_001246624.1	diabetes and obesity regulated, isoform G [Drosophila melanogaster]	0.001	15.444	24	5	7	5	1	417	45.7	7.12	72	5	1.999	2.98	2.858	0.114039	0.0469186	0.06032	48.5	144.4	96.9	138.5	24.84	2.94	15.39	3.5	High	High	High	High	High	High	High	High
FALSE	High	Master Protein	NP_610116.2	Ac3, isoform A [Drosophila melanogaster]	0	30.411	7	11	24	11	1	1167	130.3	6.16	224	11	1.999	1.774	1.832	0.0369658	0.0750584	0.0708998	66.2	117.5	132.4	121.3	7.99	7.5	1.76	7.72	High	High	High	High	High	High	High	High
FALSE	High	Master Protein	NP_996217.1	tropomyosin 1, isoform K [Drosophila melanogaster]	0	304.318	49	48	295	3	1	518	54.6	4.41	4810	48	1.999	2.79	1.516	0.278139	0.131886	0.739102	60.6	169.1	121.1	91.9	44.45	18.83	0.85	1.26	High	High	High	High	High	High	High	High
FALSE	High	Master Protein	NP_724406.1	super sex combs, isoform A [Drosophila melanogaster]	0.002	15.002	4	3	4	3	1	1059	118.6	7.15	86	3	1.999	2.044	1.477	0.131761	0.146226	0.519858	65.7	134.4	131.4	97.1	7.43	32.02	9.1	15.6	High	High	High	High	High	High	High	High
FALSE	High	Master Protein	NP_611694.2	Ugt58Fa, isoform A [Drosophila melanogaster]	0	37.656	22	9	18	9	1	529	59.1	7.25	437	9	1.998	1.753	2.067	0.0453672	0.0977619	0.0622241	64.3	112.7	128.5	132.9	4.43	3.63	2.37	19.06	High	High	High	High	High	High	High	High
FALSE	Medium	Master Protein	NP_728145.1	ariadne 1, isoform B [Drosophila melanogaster]	0.011	4.557	2	1	1	1	1	503	58.9	5.36	67	1	1.997	1.672	1.32	0.438034	0.747737	1	62.3	104.2	124.5	82.3	50.66	10.05	3.85	7.99	High	High	High	High	High	High	High	High
FALSE	High	Master Protein	NP_523860.2	zipper, isoform A [Drosophila melanogaster]	0	1190.91	61	180	847	4	1	2056	236.5	5.62	18360	180	1.997	2.253	1.398	0.331507	0.273264	0.94894	66.5	149.8	132.8	92.9	25.64	2.5	7.68	21.64	High	High	High	High	High	High	High	High
FALSE	High	Master Protein	NP_001097498.1	ensconsin, isoform F [Drosophila melanogaster]	0	52.714	12	17	29	17	1	1241	135.7	9.19	325	17	1.997	1.874	1.667	0.151033	0.228018	0.348886	64.3	120.5	128.4	107.2	0.05	17.78	6.87	3.15	High	High	High	High	High	High	High	High
FALSE	Medium	Master Protein	NP_523940.2	tektin C, isoform A [Drosophila melanogaster]	0.036	2.888	2	1	1	1	1	421	49.1	7.55	38	1	1.996	2.163	2.02	0.361466	0.329543	0.396131	63.9	138.3	127.6	129.1	24.7	9.9	0.45	28.44	High	High	High	High	High	High	High	High
FALSE	High	Master Protein	NP_729748.3	uncharacterized protein Dmel_CG42255 [Drosophila melanogaster]	0	19.544	2	7	12	7	1	3613	403.3	6.64	173	7	1.994	1.814	2.459	0.0468672	0.0875774	0.0452772	61.1	110.9	121.9	150.3	13.51	2.97	17.78	9.61	High	High	High	High	High	High	High	High
FALSE	Medium	Master Protein	NP_611872.1	CG3163 [Drosophila melanogaster]	0.03	3.285	3	1	1	1	1	368	41.5	8.34	45	1	1.993	1.578	1.317	0.141308	0.414456	0.836575	69.3	109.3	138.1	91.3	29.58	9.42	19.66	8.35	High	High	High	High	High	High	High	High
FALSE	High	Master Protein	NP_001259886.1	WD repeat domain 62, isoform G [Drosophila melanogaster]	0.004	7.584	1	2	2	2	1	2397	262.7	8.19	63	2	1.993	1.761	2.457	0.43765	0.666627	0.296303	61.6	108.4	122.7	151.3	8.41	47.81	18.95	3.76	High	High	High	High	High	High	High	High
FALSE	High	Master Protein	NP_726548.1	uncharacterized protein Dmel_CG31998, isoform A [Drosophila melanogaster]	0	26.354	5	7	9	7	1	1459	161.8	8.24	240	7	1.993	2.355	1.577	0.104154	0.0786994	0.326779	59.7	140.6	118.9	94.1	2.23	13.23	3.79	4.65	High	High	High	High	High	High	High	High
FALSE	High	Master Protein	NP_648434.1	CG6272, isoform A [Drosophila melanogaster]	0.002	9.502	28	3	6	3	1	113	13	9.11	113	3	1.989	2.44	1.72	0.581987	0.425314	0.841317	58.3	142.3	116	100.3	12.23	37.52	5.1	2.6	High	High	High	High	High	High	High	High
FALSE	High	Master Protein	NP_730938.1	uncharacterized protein Dmel_CG31547, isoform B [Drosophila melanogaster]	0	31.396	7	8	17	8	1	1068	117.8	8.09	437	8	1.987	1.647	1.552	0.102076	0.265152	0.341883	66.8	110	132.7	103.7	2.76	11.3	3.35	0.09	High	High	High	High	High	High	High	High
FALSE	High	Master Protein	NP_001261617.1	resistant to dieldrin, isoform G [Drosophila melanogaster]	0	35.041	16	4	24	4	1	608	66	9.13	862	4	1.987	1.747	1.637	0.248504	0.438727	0.536372	66.5	116.1	132.1	108.9	0.15	5.27	17.4	2.51	High	High	High	High	High	High	High	High
FALSE	High	Master Protein	NP_001260457.1	RNA polymerase II elongation factor, isoform B [Drosophila melanogaster]	0	22.318	20	5	10	5	1	313	34.3	9.06	294	5	1.987	2.108	1.531	0.267377	0.263215	0.698135	61.9	130.5	123	94.8	1.19	29.68	6.72	19.22	High	High	High	High	High	High	High	High
FALSE	High	Master Protein	NP_610743.2	Cyp6g1, isoform A [Drosophila melanogaster]	0	66.709	27	14	49	12	1	524	59.8	8.1	971	14	1.986	1.577	2.911	0.106345	0.328168	0.0568463	61	96.1	121	177.5	12.02	22.86	12.83	2.66	High	High	High	High	High	High	High	High
FALSE	High	Master Protein	NP_001259691.1	uncharacterized protein Dmel_CG42450, isoform B [Drosophila melanogaster]	0	26.049	8	8	12	8	1	1280	138	5.69	281	8	1.986	1.883	2.087	0.125142	0.183339	0.136686	61.1	115	121.2	127.4	0.24	19.95	3.55	10.31	High	High	High	High	High	High	High	High
FALSE	Low	Master Protein	NP_649865.1	beag [Drosophila melanogaster]	0.099	1.535	1	1	1	1	1	557	61.4	6.86	26	1	1.985	2.942	1.696	0.621016	0.320927	0.892253	50	147	99.2	84.8	12.7	47.87	21.31	45.85	High	High	High	High	High	High	High	High
FALSE	High	Master Protein	NP_609930.4	uncharacterized protein Dmel_CG31793, isoform A [Drosophila melanogaster]	0	70.936	15	17	47	10	1	1307	145.7	7.99	738	17	1.984	0.746	1.904	0.374708	1	0.46971	78	58.2	154.8	148.6	13.31	48.13	23.43	12.62	High	High	High	High	High	High	High	High
FALSE	High	Master Protein	NP_733175.1	CG6330, isoform A [Drosophila melanogaster]	0	39.712	18	7	20	7	1	368	41.3	6.95	431	7	1.984	1.649	1.72	0.0218385	0.0414253	0.0452537	68.7	113.3	136.3	118.2	6.7	9.96	5.74	7.02	High	High	High	High	High	High	High	High
FALSE	High	Master Protein	NP_609794.1	CG5888, isoform A [Drosophila melanogaster]	0.002	11.836	6	5	8	5	1	455	51.6	6.79	132	5	1.984	2.55	3.02	0.448259	0.277483	0.192905	50.4	128.5	100	152.2	2.92	37.04	6.62	5.96	High	High	High	High	High	High	High	High
FALSE	High	Master Protein	NP_611537.2	RIC3 acetylcholine receptor chaperone, isoform C [Drosophila melanogaster]	0	56.695	24	11	29	1	1	505	55.1	6.43	688	11	1.982	1.945	1.229	0.613069	0.706921	1	65.9	128.2	130.7	81	11.33	39.95	20.46	47.96	High	High	High	High	High	High	High	High
FALSE	High	Master Protein	NP_610107.1	CG8665 [Drosophila melanogaster]	0	24.695	6	6	9	6	1	913	100.2	6.7	214	6	1.982	1.65	2.567	0.0713973	0.193267	0.054715	60.7	100.2	120.4	155.9	8.67	13.43	0.59	12.68	High	High	High	High	High	High	High	High
FALSE	High	Master Protein	NP_001287299.1	defective proboscis extension response 15, isoform B [Drosophila melanogaster]	0.006	5.572	3	2	2	2	1	662	70.1	8.87	56	2	1.981	1.805	1.61	0.264386	0.412826	0.591835	65.9	118.9	130.5	106.1	11.36	22.89	28.14	11.31	High	High	High	High	High	High	High	High
FALSE	High	Master Protein	NP_730790.2	gelsolin, isoform D [Drosophila melanogaster]	0	94.983	27	19	63	19	1	798	88.3	5.1	1676	19	1.981	1.745	1.362	0.0310663	0.0627552	0.250225	71.5	124.7	141.6	97.3	3.52	16.51	1.61	11.55	High	High	High	High	High	High	High	High
FALSE	High	Master Protein	NP_611665.1	Rtf1, isoform A [Drosophila melanogaster]	0.006	5.818	5	2	2	2	1	775	87.5	8.53	48	2	1.981	1.599	1.725	0.0512862	0.164249	0.121718	68	108.8	134.8	117.4	4.78	3.88	4.75	8.53	High	High	High	High	High	High	High	High
FALSE	High	Master Protein	NP_477448.1	signal transducing adaptor molecule [Drosophila melanogaster]	0	39.743	15	7	14	7	1	689	74.6	5.58	501	7	1.979	1.904	2.324	0.417613	0.523418	0.310899	57.8	110.1	114.4	134.4	10.15	27.87	5.18	21.93	High	High	High	High	High	High	High	High
FALSE	High	Master Protein	NP_610176.1	CCR4-NOT transcription complex subunit 3, isoform A [Drosophila melanogaster]	0.002	10.646	4	3	4	3	1	844	92.3	6.79	109	3	1.978	1.963	1.312	0.233884	0.282138	0.969197	63.9	125.5	126.5	83.9	26.13	4.03	12.09	2.1	High	High	High	High	High	High	High	High
FALSE	High	Master Protein	NP_001261484.1	uncharacterized protein Dmel_CG10103, isoform C [Drosophila melanogaster]	0	57.845	27	13	26	13	1	396	43.2	5.78	504	13	1.978	1.706	1.39	0.0653917	0.150567	0.42729	70.9	120.9	140.2	98.6	2.21	15.4	4.41	19.9	High	High	High	High	High	High	High	High
FALSE	High	Master Protein	NP_001262585.1	myofilin, isoform O [Drosophila melanogaster]	0	135.467	61	23	126	3	1	310	36	9.82	2546	23	1.978	3.684	1.532	0.255805	0.0669262	0.673473	54.6	201.3	108	83.7	9.87	5.4	33.67	0.71	High	High	High	High	High	High	High	High
FALSE	Medium	Master Protein	NP_001189164.1	tube [Drosophila melanogaster]	0.01	4.716	5	2	2	2	1	462	49.7	4.56	50	2	1.977	2.689	2.223	0.725342	0.479878	0.657736	54.6	146.7	107.9	121.3	9.78	28.53	7.2	12.26	High	High	High	High	High	High	High	High
FALSE	High	Master Protein	NP_649263.2	protein kinase, cAMP-dependent, regulatory subunit type 1, isoform O [Drosophila melanogaster]	0	33.487	9	6	13	1	1	463	51.7	5.52	362	6	1.976	1.747	1.45	0.0693489	0.142349	0.351322	71.1	124.2	140.4	103	3.78	17.59	0.4	21.47	High	High	High	High	High	High	High	High
FALSE	High	Master Protein	NP_723909.2	cullin 3, isoform F [Drosophila melanogaster]	0	25.604	8	9	10	9	1	934	106.8	9.09	187	9	1.975	1.606	2.093	0.222886	0.529918	0.217925	65.6	105.3	129.6	137.3	6.6	41.31	12.39	13.22	High	High	High	High	High	High	High	High
FALSE	High	Master Protein	NP_651111.1	uncharacterized protein Dmel_CG13833 [Drosophila melanogaster]	0.002	15.093	16	3	5	3	1	321	35.3	8.79	151	3	1.974	2.53	1.825	0.415151	0.254361	0.571506	60.3	152.5	119.1	110	1.15	17.81	9.62	41.26	High	High	High	High	High	High	High	High
FALSE	High	Master Protein	NP_523760.1	fidipidine [Drosophila melanogaster]	0.003	8.317	5	3	4	3	1	595	69.3	5.85	57	3	1.974	1.958	2.391	0.11666	0.145227	0.0821842	57.2	111.9	112.9	136.7	12.09	2.66	0.7	19.16	High	High	High	High	High	High	High	High
FALSE	High	Master Protein	NP_650368.1	Cyp313a1 [Drosophila melanogaster]	0.002	15.066	8	4	10	4	1	492	56.5	8.82	289	4	1.974	2.082	2.834	0.0768086	0.0821609	0.0469802	57	118.7	112.5	161.6	2.94	0.02	4.38	3.92	High	High	High	High	High	High	High	High
FALSE	High	Master Protein	NP_524006.1	laminin B2, isoform A [Drosophila melanogaster]	0	258.168	32	56	133	56	1	1639	182.2	5.38	3069	56	1.973	1.832	1.225	0.105232	0.168931	0.94894	69	126.5	136.2	84.6	4.44	5.25	9.72	8.46	High	High	High	High	High	High	High	High
FALSE	High	Master Protein	NP_649339.2	CG7166, isoform B [Drosophila melanogaster]	0.004	7.977	4	2	4	2	1	467	53	6.87	45	2	1.973	1.034	1.242	0.581987	1	1	80.7	83.4	159.2	100.2	6.32	60.96	12.64	33.43	High	High	High	High	High	High	High	High
FALSE	High	Master Protein	NP_652600.1	anaplastic lymphoma kinase, isoform A [Drosophila melanogaster]	0	37.864	7	10	19	10	1	1701	185.5	6.57	586	10	1.971	1.668	1.662	0.0960953	0.234659	0.234533	67.2	112	132.4	111.6	10	1.8	1.66	0.24	High	High	High	High	High	High	High	High
FALSE	High	Master Protein	NP_001246224.1	pyruvate dehydrogenase kinase, isoform C [Drosophila melanogaster]	0	55.297	35	12	27	1	1	413	46.6	7.15	586	12	1.97	1.955	1.219	0.118052	0.146226	0.98307	69.2	135.2	136.2	84.3	5.6	13.91	6.38	9.31	High	High	High	High	High	High	High	High
FALSE	High	Master Protein	NP_001262171.2	Wnk kinase, isoform M [Drosophila melanogaster]	0	22.697	3	6	7	6	1	2462	272.7	6.81	121	6	1.969	1.605	1.934	0.104154	0.292819	0.143091	66.3	106.4	130.5	128.2	13.32	16.74	10.5	10.11	High	High	High	High	High	High	High	High
FALSE	High	Master Protein	NP_001261614.1	boule, isoform F [Drosophila melanogaster]	0	29.831	36	6	11	6	1	233	25.2	7.11	231	6	1.968	2.078	2.574	0.024906	0.0356249	0.0238667	58.8	122.2	115.8	151.3	1.64	2.05	1.36	16.2	High	High	High	High	High	High	High	High
FALSE	High	Master Protein	NP_651722.1	yata, isoform A [Drosophila melanogaster]	0.002	10.389	3	4	5	4	1	873	97.1	6.7	42	4	1.968	1.631	1.741	0.4402	0.773955	0.670344	67.9	110.8	133.7	118.3	25.57	39.84	8.37	26.81	High	High	High	High	High	High	High	High
FALSE	High	Master Protein	NP_001163067.1	serpin 42Dd [Drosophila melanogaster]	0	21.175	15	4	8	4	1	372	41.2	5.63	210	4	1.968	1.539	2	0.0401402	0.147958	0.0596359	68.3	105.1	134.3	136.5	5.84	8.15	5.32	4.38	High	High	High	High	High	High	High	High
FALSE	High	Master Protein	NP_651807.1	jdp, isoform A [Drosophila melanogaster]	0	28.841	37	8	15	8	1	195	21.6	7.44	313	8	1.967	1.868	1.587	0.484439	0.611316	0.856286	66.7	124.6	131.2	105.9	11.91	46.08	14.84	15.85	High	High	High	High	High	High	High	High
FALSE	High	Master Protein	NP_650423.1	myofilin, isoform B [Drosophila melanogaster]	0	141.014	57	24	137	2	1	365	41.6	9.39	2713	24	1.966	2.25	0.847	0.206226	0.159624	1	70.2	157.9	137.9	59.4	2.12	8.39	33.45	13.06	High	High	High	High	High	High	High	High
FALSE	High	Master Protein	NP_648327.1	pathetic, isoform A [Drosophila melanogaster]	0	74.102	19	9	98	9	1	471	52	7.71	2530	9	1.965	1.253	1.292	0.186379	1	0.943313	68.4	85.6	134.3	88.3	3.68	12.38	0.09	9.23	High	High	High	High	High	High	High	High
FALSE	High	Master Protein	NP_651249.2	CG6454, isoform C [Drosophila melanogaster]	0.005	7.032	2	3	3	3	1	1569	172.1	6.68	31	3	1.965	1.673	1.607	0.271268	0.528092	0.59407	67.2	112.4	132	107.9	37.65	1.92	19.86	8.28	High	High	High	High	High	High	High	High
FALSE	Medium	Master Protein	NP_647856.2	uncharacterized protein Dmel_CG14990 [Drosophila melanogaster]	0.044	2.593	4	1	1	1	1	322	35.2	5.22	0	1	1.965	1.457	2.301	0.0926282	0.421153	0.0782755	61.8	90	121.4	142.1	7.32	7.2	1.68	14.82	High	High	High	High	High	High	High	High
FALSE	High	Master Protein	NP_525057.2	syntaxin 4, isoform A [Drosophila melanogaster]	0.002	11.217	13	3	4	3	1	333	38.5	7.02	127	3	1.964	1.303	0.974	0.0516124	0.524779	1	77.4	100.9	152.1	75.4	1.24	18.28	6.09	11.12	High	High	High	High	High	High	High	High
FALSE	High	Master Protein	NP_609185.1	phosphatidic acid phospholipase A1, isoform A [Drosophila melanogaster]	0	22.758	4	8	9	8	1	2016	214	4.79	87	8	1.964	1.434	1.472	0.129344	0.561172	0.49759	70.2	100.7	137.9	103.4	14.33	0.09	5.33	12.89	High	High	High	High	High	High	High	High
FALSE	High	Master Protein	NP_524419.2	Octopamine-Tyramine receptor, isoform A [Drosophila melanogaster]	0.003	8.544	6	4	4	4	1	601	64.6	8.03	36	4	1.964	1.834	1.856	0.114343	0.179157	0.173119	67.4	123.5	132.3	125	6.41	9.84	3.32	25.86	High	High	High	High	High	High	High	High
FALSE	High	Master Protein	NP_523827.1	lethal (2) essential for life, isoform A [Drosophila melanogaster]	0	64.338	52	11	46	11	1	187	21.3	6.21	821	11	1.964	2.063	1.599	0.267008	0.269615	0.596306	63.6	131.2	124.9	101.7	5.15	7.43	9.48	3.35	High	High	High	High	High	High	High	High
FALSE	High	Master Protein	NP_650678.1	CG7218, isoform A [Drosophila melanogaster]	0	29.03	11	6	12	6	1	676	75.5	8.24	391	6	1.963	2.215	2.334	0.115192	0.095063	0.0857055	52.7	116.8	103.5	123	1.71	11.87	13.26	9.17	High	High	High	High	High	High	High	High
FALSE	High	Master Protein	NP_996248.1	Na pump alpha subunit, isoform G [Drosophila melanogaster]	0	947.939	62	84	1953	3	1	1002	111.2	5.59	51200	84	1.963	1.488	1.429	0.0218385	0.0718928	0.0951881	73.2	108.9	143.7	104.6	9.89	1.39	8.62	6.66	High	High	High	High	High	High	High	High
FALSE	High	Master Protein	NP_542440.1	bride of sevenless [Drosophila melanogaster]	0.004	7.973	2	3	3	3	1	896	99.9	5.69	20	3	1.963	1.296	1.061	0.409846	1	1	79.4	102.9	155.8	84.3	29.44	35.89	19.81	28.01	High	High	High	High	High	High	High	High
FALSE	High	Master Protein	NP_001260514.1	cytochrome b5-related, isoform B [Drosophila melanogaster]	0	64.061	23	11	42	11	1	436	50.3	8.12	965	11	1.961	1.374	2.994	0.0814984	0.523418	0.0452772	62.1	85.4	121.8	186	4.52	20.25	3.05	9.67	High	High	High	High	High	High	High	High
FALSE	High	Master Protein	NP_731299.1	uncharacterized protein Dmel_CG31100, isoform A [Drosophila melanogaster]	0	39.192	12	9	24	9	1	716	79	7.58	676	9	1.961	1.838	2.087	0.0439692	0.0733798	0.0574429	63.1	115.9	123.7	131.7	2.4	17.92	3.18	4.43	High	High	High	High	High	High	High	High
FALSE	High	Master Protein	NP_001285735.1	WW domain containing oxidoreductase, isoform B [Drosophila melanogaster]	0	32.819	19	7	19	7	1	409	46.5	7.49	536	7	1.96	1.058	2.044	0.0218385	1	0.0257764	70.8	74.9	138.7	144.6	2.97	6.52	3.93	7.03	High	High	High	High	High	High	High	High
FALSE	High	Master Protein	NP_001163275.2	phosphodiesterase 8, isoform O [Drosophila melanogaster]	0	20.785	8	8	8	2	1	1050	117.6	6.62	89	8	1.96	2.092	1.798	0.512722	0.49724	0.691031	62.1	129.9	121.6	111.6	30.03	14.9	16.11	22.73	High	High	High	High	High	High	High	High
FALSE	High	Master Protein	NP_001263168.1	dead box protein 80, isoform E [Drosophila melanogaster]	0.003	9.142	4	3	4	3	1	481	53.5	6.76	62	3	1.959	2.548	1.617	0.0435345	0.0356249	0.132578	60.3	153.7	118.1	97.5	1.95	17.33	8.28	11.25	High	High	High	High	High	High	High	High
FALSE	High	Master Protein	NP_572302.2	Rabconnectin-3A [Drosophila melanogaster]	0	93.643	8	24	44	24	1	3426	377.1	6.16	1129	24	1.958	1.797	1.687	0.0668683	0.120803	0.161216	65.7	118.1	128.6	110.8	4.63	13.78	3.27	2.48	High	High	High	High	High	High	High	High
FALSE	Medium	Master Protein	NP_001097131.2	Shaw-like, isoform C [Drosophila melanogaster]	0.044	2.574	1	1	3	1	1	937	100.9	6.86	43	1	1.957	1.101	1.782	0.11666	1	0.203795	74.5	82.1	145.8	132.8	16.54	20.33	5.12	6.36	High	High	High	High	High	High	High	High
FALSE	High	Master Protein	NP_723903.3	yuri gagarin, isoform B [Drosophila melanogaster]	0.004	8.118	3	3	6	3	1	890	101.8	5.39	77	3	1.956	2.281	1.878	0.0174167	0.0224811	0.0238667	60.7	138.5	118.8	114	5.83	1.86	3.45	9.5	High	High	High	High	High	High	High	High
FALSE	High	Master Protein	NP_001097274.1	uncharacterized protein Dmel_CG34228 [Drosophila melanogaster]	0	16.712	38	4	8	4	1	88	9.9	9.17	247	4	1.954	0.983	1.329	0.0434024	1	0.389804	77.9	76.6	152.3	103.5	2.5	14.6	5.56	8.09	High	High	High	High	High	High	High	High
FALSE	High	Master Protein	NP_650447.1	specifically Rac1-associated protein 1 [Drosophila melanogaster]	0	45.745	11	15	23	15	1	1291	149.2	7.12	333	15	1.954	1.533	1.534	0.0366801	0.134096	0.14249	72	110.4	140.7	110.4	6.5	17.25	7.58	1.69	High	High	High	High	High	High	High	High
FALSE	High	Master Protein	NP_001262976.1	tetraspanin 96F, isoform B [Drosophila melanogaster]	0	25.074	11	3	33	3	1	284	31.8	5.83	929	3	1.954	1.736	1.45	0.026316	0.0525678	0.140893	70.4	122.2	137.5	102	3.16	15.66	6.59	6.52	High	High	High	High	High	High	High	High
FALSE	High	Master Protein	NP_001246786.1	myosin binding subunit, isoform O [Drosophila melanogaster]	0	23.483	7	8	10	5	1	1273	137.3	6.23	78	8	1.953	2.193	1.699	0.0960953	0.0821609	0.207905	61	133.8	119.2	103.7	6.86	5.99	19.06	10.71	High	High	High	High	High	High	High	High
FALSE	High	Master Protein	NP_523497.2	adenosine 3, isoform A [Drosophila melanogaster]	0	124.376	25	31	55	31	1	1353	144.4	7.21	1144	31	1.953	1.269	1.973	0.0412584	0.522042	0.0600275	69.7	88.5	136.1	137.6	6.98	7.89	5.36	9.05	High	High	High	High	High	High	High	High
FALSE	High	Master Protein	NP_524603.2	guanylyl cyclase beta-subunit at 100B [Drosophila melanogaster]	0	17.687	7	6	10	6	1	787	86.8	5.78	123	6	1.952	1.377	1.622	0.029154	0.20794	0.0821238	71.1	97.9	138.7	115.3	3.43	5.6	15.81	4.61	High	High	High	High	High	High	High	High
FALSE	High	Master Protein	NP_610443.1	prophenoloxidase 2 [Drosophila melanogaster]	0	74.13	31	19	38	19	1	684	79.2	6.98	971	19	1.95	2.444	0.765	0.0370086	0.0355254	0.378789	69.9	170.7	136.2	53.5	2.08	17.32	2.81	11.69	High	High	High	High	High	High	High	High
FALSE	High	Master Protein	NP_524836.2	coat protein (coatomer) beta' [Drosophila melanogaster]	0	58.777	17	15	33	15	1	914	102.6	5.26	548	15	1.949	1.818	1.62	0.0310663	0.0504801	0.0881375	68.4	124.3	133.2	110.7	9.44	13.07	7.91	2.93	High	High	High	High	High	High	High	High
FALSE	High	Master Protein	NP_731246.2	uncharacterized protein Dmel_CG45263, isoform E [Drosophila melanogaster]	0	19.541	3	5	7	5	1	1876	206.6	7.81	122	5	1.949	1.517	1.904	0.0453569	0.181197	0.0708672	67.6	102.5	131.7	128.7	12.65	18.14	1.74	3.47	High	High	High	High	High	High	High	High
FALSE	High	Master Protein	NP_728003.1	septin 4, isoform A [Drosophila melanogaster]	0.005	7.047	6	2	3	2	1	427	49	7.27	156	2	1.948	1.967	2.245	0.139552	0.163051	0.112778	58.5	115	113.9	131.3	19.89	4.87	16.05	25.98	High	High	High	High	High	High	High	High
FALSE	High	Master Protein	NP_524520.1	ribonuclear protein at 97D, isoform B [Drosophila melanogaster]	0	15.512	13	6	8	6	1	471	51.4	9.06	123	6	1.948	2.389	4.963	0.0913451	0.0601467	0.0238667	43.2	103.3	84.2	214.6	14.88	4.53	14	2.06	High	High	High	High	High	High	High	High
FALSE	High	Master Protein	NP_648918.1	CG9701 [Drosophila melanogaster]	0.005	6.733	5	3	4	3	1	541	61.8	6.37	36	3	1.947	2.459	1.624	0.144556	0.0860601	0.347779	64.2	157.8	124.9	104.2	16.56	21.8	9.02	23.13	High	High	High	High	High	High	High	High
FALSE	High	Master Protein	NP_724277.2	uncharacterized protein Dmel_CG31678, isoform B [Drosophila melanogaster]	0	47.661	9	14	22	14	1	1417	154.4	5.38	313	14	1.947	1.573	2.294	0.11666	0.336661	0.0888949	64.6	101.6	125.7	148.1	12.93	3.58	1.8	14.02	High	High	High	High	High	High	High	High
FALSE	High	Master Protein	NP_650956.1	O-GlcNAcase [Drosophila melanogaster]	0.002	12.623	5	4	4	4	1	1019	113.8	4.88	130	4	1.946	1.267	1.252	0.326698	1	1	76.3	96.7	148.5	95.6	4	25.76	14.45	43.4	High	High	High	High	High	High	High	High
FALSE	High	Master Protein	NP_723045.1	collagen type IV alpha 1, isoform B [Drosophila melanogaster]	0	35.723	3	6	29	6	1	1779	174.2	8.6	1113	6	1.945	1.768	1.604	0.142289	0.247892	0.359968	66.6	117.8	129.6	106.9	5.01	2.67	10.01	8	High	High	High	High	High	High	High	High
FALSE	High	Master Protein	NP_724841.1	pyruvate carboxylase, isoform I [Drosophila melanogaster]	0	582.703	64	89	589	89	1	1197	132.6	6.64	13664	89	1.944	1.482	1.277	0.0351967	0.151794	0.424817	74.9	111	145.6	95.6	5.45	8.27	18.23	4.61	High	High	High	High	High	High	High	High
FALSE	High	Master Protein	NP_001260993.1	SR protein kinase, isoform D [Drosophila melanogaster]	0	49.835	17	12	22	12	1	939	103.3	9.22	595	12	1.944	2.093	2.215	0.0609045	0.0601111	0.0600275	57.8	121.1	112.4	128.1	4.03	2.38	4.57	8.95	High	High	High	High	High	High	High	High
FALSE	High	Master Protein	NP_001259183.2	pecanex, isoform E [Drosophila melanogaster]	0.002	10.003	1	4	4	4	1	3417	365.6	6.1	75	4	1.943	1.69	1.675	0.630004	0.888291	0.895023	60.8	102.7	118	101.8	7.93	20.07	9.57	20.83	High	High	High	High	High	High	High	High
FALSE	High	Master Protein	NP_001097646.1	shaker cognate l, isoform B [Drosophila melanogaster]	0.002	12.153	12	4	6	4	1	571	64.5	8.03	29	4	1.943	1.642	1.765	0.219715	0.463536	0.354421	69.2	113.6	134.4	122.1	32.77	19.79	2.35	17.46	High	High	High	High	High	High	High	High
FALSE	Low	Master Protein	NP_611937.2	CG4681 [Drosophila melanogaster]	0.064	2.132	3	1	1	1	1	388	44.2	9.66	0	1	1.942	2.095	6.872	1	1	0.346135	39.6	83.1	77	272.5	25.75	21.53	13.02	8.76	High	High	High	High	High	High	High	High
FALSE	High	Master Protein	NP_611870.3	CG3907, isoform B [Drosophila melanogaster]	0.006	5.702	6	2	2	2	1	400	44.9	8.4	73	2	1.942	1.595	2.561	0.0320974	0.0916253	0.0278183	61.7	98.4	119.8	158	4.56	9.18	13.16	1.92	High	High	High	High	High	High	High	High
FALSE	High	Master Protein	NP_727588.2	regucalcin, isoform D [Drosophila melanogaster]	0	146.789	73	22	137	22	1	319	35.3	6.39	4117	22	1.941	1.09	1.322	0.0745062	1	0.589378	82.3	89.7	159.8	108.8	5.04	14.29	1.76	8.51	High	High	High	High	High	High	High	High
FALSE	High	Master Protein	NP_001260800.2	LDL receptor protein 1, isoform F [Drosophila melanogaster]	0	24.735	2	10	12	10	1	4752	530.2	5.24	206	10	1.941	1.233	1.364	0.0327576	0.526627	0.239704	76.4	94.2	148.3	104.2	8.74	2.55	14.25	5.42	High	High	High	High	High	High	High	High
FALSE	High	Master Protein	NP_649051.3	charged multivesicular body protein 1, isoform A [Drosophila melanogaster]	0	22.665	29	9	27	9	1	203	22.3	6.61	375	9	1.941	2.164	1.671	0.217692	0.181298	0.429041	63.5	137.4	123.2	106.1	2.49	21.83	8.21	13.99	High	High	High	High	High	High	High	High
FALSE	High	Master Protein	NP_788675.1	CG9297, isoform A [Drosophila melanogaster]	0	160.84	30	28	117	28	1	930	103.7	4.27	2619	28	1.94	1.167	1.091	0.408243	1	1	80.6	94.1	156.3	87.9	21.88	13.05	0.42	52.11	High	High	High	High	High	High	High	High
FALSE	High	Master Protein	NP_610776.1	cuticular protein 49Ag [Drosophila melanogaster]	0.002	11.849	15	1	7	1	1	134	14.5	4.67	258	1	1.94	1.938	2.329	0.604524	0.675334	0.45931	57	110.5	110.6	132.8	4.3	5.42	22.64	3.74	High	High	High	High	High	High	High	High
FALSE	High	Master Protein	NP_731765.1	uncharacterized protein Dmel_CG46280, isoform B [Drosophila melanogaster]	0	80.881	19	13	45	13	1	532	58.8	6.15	1089	13	1.94	1.956	2.105	0.0810897	0.0999412	0.0819987	60.5	118.3	117.3	127.4	6.63	0.95	6.26	6.5	High	High	High	High	High	High	High	High
FALSE	High	Master Protein	NP_525001.2	integrin linked kinase, isoform A [Drosophila melanogaster]	0	17.807	10	6	11	6	1	448	50.7	7.44	136	6	1.938	1.492	1.37	0.196241	0.598585	0.8006	72.2	107.7	139.9	98.9	2.06	39.1	9.43	10.85	High	High	High	High	High	High	High	High
FALSE	Medium	Master Protein	NP_647940.1	Rh50, isoform A [Drosophila melanogaster]	0.019	3.792	5	1	3	1	1	449	48.2	5.92	22	1	1.938	1.11	1.658	0.11125	1	0.251109	76.5	84.8	148.2	126.8	1.2	10.43	10.53	24.12	High	High	High	High	High	High	High	High
FALSE	High	Master Protein	NP_788887.1	uncharacterized protein Dmel_CG10962 [Drosophila melanogaster]	0.002	15.168	12	3	7	3	1	249	27.1	6.55	150	3	1.937	1.041	1.487	0.0346555	1	0.148611	76.3	79.4	147.8	113.4	4.07	1.68	5.49	6.05	High	High	High	High	High	High	High	High
FALSE	High	Master Protein	NP_001246185.1	uncharacterized protein Dmel_CG43340, isoform H [Drosophila melanogaster]	0	31.782	10	8	10	2	1	1020	111.6	5.14	313	8	1.937	1.925	2.006	0.254165	0.304481	0.265569	59.9	115.2	115.9	120.1	3.6	1.34	31.45	1.94	High	High	High	High	High	High	High	High
FALSE	High	Master Protein	NP_730051.1	CG7945, isoform A [Drosophila melanogaster]	0.002	12.686	14	4	7	4	1	262	29.3	5.62	141	4	1.936	2.098	2.351	0.139856	0.128957	0.0957145	60.1	126.1	116.3	141.3	11.69	0.1	18.9	17.96	High	High	High	High	High	High	High	High
FALSE	High	Master Protein	NP_001163064.1	lethal (2) 01289, isoform G [Drosophila melanogaster]	0	375.773	38	53	244	1	1	1191	136.5	4.25	3892	53	1.934	1.947	1.164	0.475341	0.52702	1	70	136.3	135.4	81.4	11.97	29.78	2.09	33.18	High	High	High	High	High	High	High	High
FALSE	High	Master Protein	NP_524303.2	iron regulatory protein 1B [Drosophila melanogaster]	0	152.282	41	31	101	23	1	899	98.5	5.95	2542	31	1.932	1.35	1.619	0.164485	0.775764	0.379313	74.6	100.7	144.1	120.7	7.69	21.04	4.42	6.06	High	High	High	High	High	High	High	High
FALSE	High	Master Protein	NP_001163129.1	glutaminase, isoform H [Drosophila melanogaster]	0	27.555	10	6	10	6	1	775	85.2	7.24	323	6	1.931	1.811	1.917	0.260091	0.374843	0.310029	62.8	113.8	121.3	120.4	20.43	11.39	3.88	16.4	High	High	High	High	High	High	High	High
FALSE	High	Master Protein	NP_728869.1	PHGPx, isoform D [Drosophila melanogaster]	0	127.622	40	15	113	15	1	238	26.2	8.76	2323	15	1.931	1.426	1.809	0.0439692	0.244702	0.0800597	70.5	100.6	136.2	127.6	0.51	10.56	9.59	7.77	High	High	High	High	High	High	High	High
FALSE	High	Master Protein	NP_732900.1	HMG coenzyme A reductase [Drosophila melanogaster]	0.002	13.146	6	4	5	4	1	920	98.3	6.61	143	4	1.931	2.408	1.553	0.139355	0.0846429	0.399137	60.5	145.8	116.9	94	27.78	3.96	5.85	15.73	High	High	High	High	High	High	High	High
FALSE	High	Master Protein	NP_001259954.1	uncharacterized protein Dmel_CG31689, isoform H [Drosophila melanogaster]	0	19.309	6	3	8	2	1	624	70.2	7.87	194	3	1.931	1.54	1.742	0.103141	0.329084	0.192	66.9	103	129.1	116.5	24.95	2.56	13.28	13.55	High	High	High	High	High	High	High	High
FALSE	High	Master Protein	NP_648199.1	ceramide transfer protein, isoform A [Drosophila melanogaster]	0.002	9.059	4	3	4	3	1	601	68.5	5.35	35	3	1.929	1.447	1.469	0.0620623	0.304676	0.277482	71.4	103.2	137.6	104.8	10.73	6.69	2.29	7.47	High	High	High	High	High	High	High	High
FALSE	High	Master Protein	NP_730694.2	Nopp140, isoform A [Drosophila melanogaster]	0	54.135	18	14	30	2	1	720	72.2	9.04	329	14	1.928	2.016	0.683	0.627312	0.640477	1	71.2	143.5	137.3	48.6	25.37	40.08	9.09	34.91	High	High	High	High	High	High	High	High
FALSE	High	Master Protein	NP_524204.1	regulatory particle non-ATPase 10, isoform A [Drosophila melanogaster]	0	17.23	20	5	14	5	1	396	42.6	4.83	149	5	1.928	1.706	1.558	0.176477	0.326715	0.463529	69.5	118.7	134.1	108.3	9.34	14.4	1.13	0.31	High	High	High	High	High	High	High	High
FALSE	High	Master Protein	NP_476617.1	laminin A [Drosophila melanogaster]	0	308.604	15	58	169	58	1	3712	410.9	5.22	3823	58	1.927	1.653	1.125	0.0396681	0.0950498	1	72.7	120.2	140.1	81.8	1.52	1.47	8.32	2.61	High	High	High	High	High	High	High	High
FALSE	High	Master Protein	NP_001245732.1	wings up A, isoform H [Drosophila melanogaster]	0	165.11	67	26	122	12	1	260	29.1	9.7	1872	26	1.927	2.744	1.346	0.380752	0.172169	1	61.8	169.5	119	83.1	42.4	25.94	2.36	3.56	High	High	High	High	High	High	High	High
FALSE	High	Master Protein	NP_536731.1	catalase [Drosophila melanogaster]	0	343.713	74	39	375	38	1	506	57.1	8.18	9035	39	1.926	1.356	1.645	0.0609045	0.432267	0.154219	73.7	100	142	121.2	11.72	13.21	7.01	15.22	High	High	High	High	High	High	High	High
FALSE	Medium	Master Protein	NP_649023.1	CG7402 [Drosophila melanogaster]	0.031	3.186	2	2	2	2	1	579	65	6.23	28	2	1.925	2.827	1.213	0.281328	0.113091	1	61.4	173.5	118.2	74.5	3.72	0.69	14.45	22.21	High	High	High	High	High	High	High	High
FALSE	High	Master Protein	NP_650338.1	twinfilin [Drosophila melanogaster]	0	39.671	27	10	16	10	1	343	39	6.99	268	10	1.924	1.72	1.15	0.0218385	0.0360504	0.611705	73.7	126.8	141.8	84.8	6.86	10.97	3.34	0.28	High	High	High	High	High	High	High	High
FALSE	High	Master Protein	NP_001261910.1	Huntingtin-interacting protein 14, isoform B [Drosophila melanogaster]	0.002	14.3	7	4	8	4	1	655	73.3	7.99	188	4	1.923	1.683	1.635	0.0218385	0.0433292	0.0589064	68.1	114.7	131	111.4	7.21	13.75	1.78	2.35	High	High	High	High	High	High	High	High
FALSE	Low	Master Protein	NP_001188801.2	uncharacterized protein Dmel_CG42711 [Drosophila melanogaster]	0.104	1.487	6	1	1	1	1	186	20.7	8.95	0	1	1.921	2.02	1.638	0.0979455	0.1019	0.232983	65.3	132	125.5	107	12.16	9.31	4.87	23.56	High	High	High	High	High	High	High	High
FALSE	High	Master Protein	NP_523938.2	Thioredoxin-like [Drosophila melanogaster]	0	41.638	18	6	19	6	1	287	31.7	5.83	448	6	1.92	1.66	1.42	0.0609045	0.142382	0.326779	71.1	118	136.5	101	7.98	21.86	12.29	3.14	High	High	High	High	High	High	High	High
FALSE	High	Master Protein	NP_648103.1	CG8602, isoform A [Drosophila melanogaster]	0	52.267	12	6	77	6	1	478	53.3	6.39	1531	6	1.918	1.361	1.572	0.0218385	0.106521	0.0547801	72.2	98.3	138.5	113.5	2.77	11.4	5.73	5.99	High	High	High	High	High	High	High	High
FALSE	High	Master Protein	NP_611246.1	Hermansky-Pudlak syndrome 4, isoform A [Drosophila melanogaster]	0.003	8.512	3	3	3	3	1	858	96.9	7.3	87	3	1.918	1.065	1.714	0.240522	1	0.41151	64.9	69.1	124.5	111.3	11.39	20.77	10.71	6.47	High	High	High	High	High	High	High	High
FALSE	High	Master Protein	NP_524252.2	like-AP180, isoform A [Drosophila melanogaster]	0	56.488	28	11	23	2	1	468	49.8	6.21	642	11	1.916	1.49	1.717	0.263081	0.703521	0.439573	68.4	101.9	131	117.4	2.86	12.32	16.91	5.73	High	High	High	High	High	High	High	High
FALSE	High	Master Protein	NP_524999.2	partner of inscuteable [Drosophila melanogaster]	0	44.477	20	11	23	11	1	658	71.4	6.74	501	11	1.914	1.637	1.805	0.276207	0.53846	0.385358	64.6	105.7	123.6	116.6	11.08	12.98	4.97	14.65	High	High	High	High	High	High	High	High
FALSE	High	Master Protein	NP_001162795.1	nicotinic acetylcholine receptor alpha7, isoform E [Drosophila melanogaster]	0.002	13.468	5	2	5	1	1	564	63.4	5.83	68	2	1.914	1.502	1.583	0.468136	0.911361	0.816716	70.1	105.3	134.2	111	19.34	2.83	14.57	5.38	High	High	High	High	High	High	High	High
FALSE	High	Master Protein	NP_649030.1	Cyp312a1, isoform A [Drosophila melanogaster]	0	42.011	19	11	18	11	1	510	58.8	8.44	379	11	1.914	2.148	5.362	0.060995	0.0526973	0.0195785	43.8	94.1	83.8	234.8	3.67	14.63	5.07	20.73	High	High	High	High	High	High	High	High
FALSE	High	Master Protein	NP_650942.1	secretory 15 [Drosophila melanogaster]	0.003	9.172	4	3	3	3	1	766	88.7	6.4	61	3	1.914	1.999	1.799	0.0430744	0.0469186	0.0765172	64.7	129.3	123.8	116.3	18.78	8.71	0.97	9.2	High	High	High	High	High	High	High	High
FALSE	High	Master Protein	NP_001284725.1	Rho GTPase activating protein at 1A, isoform E [Drosophila melanogaster]	0	26.593	9	9	11	9	1	1404	155.6	7.15	148	9	1.913	1.788	1.649	0.23323	0.345301	0.454717	68.4	122.3	130.8	112.7	14.82	18.43	9.89	4.95	High	High	High	High	High	High	High	High
FALSE	High	Master Protein	NP_001259705.1	lethal (1) G0156, isoform D [Drosophila melanogaster]	0	232.164	64	30	297	2	1	377	40.8	7.36	6159	30	1.913	1.564	1.187	0.300855	0.65054	1	69.2	108.3	132.5	82.2	30.81	17.06	0.07	8.4	High	High	High	High	High	High	High	High
FALSE	High	Master Protein	NP_610444.2	uncharacterized protein Dmel_CG13743, isoform A [Drosophila melanogaster]	0.002	11.774	6	2	3	2	1	528	58.7	6.65	75	2	1.912	1.286	1.458	0.432233	1	0.92419	77.5	99.6	148.1	112.9	9.85	42.81	12.74	15.58	High	High	High	High	High	High	High	High
FALSE	Medium	Master Protein	NP_730508.1	peroxin 23 [Drosophila melanogaster]	0.019	3.792	1	1	1	1	1	1350	149.4	6.99	53	1	1.912	2.131	2.142	0.256105	0.213447	0.209953	60.9	129.8	116.5	130.5	25.33	7.87	19.33	3.93	High	High	High	High	High	High	High	High
FALSE	Medium	Master Protein	NP_724318.1	uncharacterized protein Dmel_CG31624, isoform A [Drosophila melanogaster]	0.036	2.92	6	1	1	1	1	178	20.2	7.56	23	1	1.911	3.105	5.569	0.526085	0.196479	0.0808668	38.8	120.4	74.1	216	38.56	18.26	20.45	21.7	High	High	High	High	High	High	High	High
FALSE	High	Master Protein	NP_573082.1	CG8578, isoform A [Drosophila melanogaster]	0	31.976	21	8	14	8	1	396	45.4	7.14	400	8	1.911	2.236	1.999	0.180786	0.128957	0.184655	61.3	137.1	117.1	122.5	17.31	1.16	27.46	12.7	High	High	High	High	High	High	High	High
FALSE	High	Master Protein	NP_524044.1	transferrin 2 [Drosophila melanogaster]	0	112.144	29	27	82	27	1	819	92.3	6.46	1542	27	1.91	1.797	1.181	0.0282541	0.0446632	0.653411	70.6	126.9	134.9	83.4	4.03	11.76	7.92	11.82	High	High	High	High	High	High	High	High
FALSE	High	Master Protein	NP_730838.3	eIF3-S10, isoform D [Drosophila melanogaster]	0	169.833	33	50	104	50	1	1140	133.8	9.01	1078	50	1.91	1.887	1.695	0.091496	0.121073	0.188135	64.6	122	123.4	109.5	4.35	9.72	3.75	5.59	High	High	High	High	High	High	High	High
FALSE	High	Master Protein	NP_724496.1	Eb1, isoform A [Drosophila melanogaster]	0	41.82	39	11	24	5	1	291	32.6	5.34	452	11	1.909	1.608	2.163	0.144429	0.343232	0.121718	63.9	102.9	122.1	138.4	3.42	4.22	3.11	5.89	High	High	High	High	High	High	High	High
FALSE	High	Master Protein	NP_650819.1	CG6231, isoform A [Drosophila melanogaster]	0	23.809	9	6	10	6	1	585	65.6	7.14	179	6	1.908	1.541	1.219	0.0467717	0.158321	0.699747	74.4	114.6	141.9	90.7	9.51	0.93	5.58	9.57	High	High	High	High	High	High	High	High
FALSE	High	Master Protein	NP_728930.1	glutamic acid decarboxylase 1, isoform B [Drosophila melanogaster]	0	79.774	29	15	80	15	1	510	57.8	6.54	1697	15	1.908	1.076	1.401	0.138799	1	0.601621	81.6	87.8	155.6	114.3	4.78	10.45	24.24	6.02	High	High	High	High	High	High	High	High
FALSE	High	Master Protein	NP_649059.1	Autophagy-related 3 [Drosophila melanogaster]	0	21.105	16	5	7	5	1	330	37	4.74	176	5	1.907	1.872	1.451	0.111755	0.145095	0.444316	68.9	128.9	131.4	99.9	4.54	2.65	6.37	6.83	High	High	High	High	High	High	High	High
FALSE	High	Master Protein	NP_001246630.1	axotactin, isoform B [Drosophila melanogaster]	0	139.951	16	29	69	2	1	2148	237.2	5.96	1749	29	1.906	2.432	2.727	0.37792	0.221202	0.170847	54.9	133.5	104.6	149.7	7.58	6	0.13	2.92	High	High	High	High	High	High	High	High
FALSE	High	Master Protein	NP_612039.1	Ppm1 [Drosophila melanogaster]	0	15.823	9	4	7	4	1	352	38.5	5.47	174	4	1.905	1.598	2.389	0.0638705	0.176497	0.0515273	62.5	99.9	119.1	149.4	12.41	12.68	10.92	12.84	High	High	High	High	High	High	High	High
FALSE	High	Master Protein	NP_733244.5	La related protein, isoform D [Drosophila melanogaster]	0	135.722	23	35	64	35	1	1673	178	9.6	1424	35	1.904	2.457	2.156	0.242849	0.131714	0.193607	54.4	133.7	103.7	117.4	11.79	17.62	5.17	9.74	High	High	High	High	High	High	High	High
FALSE	High	Master Protein	NP_610043.1	CG2611 [Drosophila melanogaster]	0.003	8.507	9	1	3	1	1	132	14.7	5.45	154	1	1.904	1.812	1.591	0.175239	0.251889	0.41151	66.6	120.6	126.8	106	28.87	3.75	18.88	18.9	High	High	High	High	High	High	High	High
FALSE	High	Master Protein	NP_477415.1	Tsc1 [Drosophila melanogaster]	0.002	10.427	3	4	5	4	1	1100	124.7	6.43	64	4	1.903	2.116	1.55	0.39175	0.329454	0.768195	65.9	139.4	125.4	102.1	9.17	12.33	28.23	1.75	High	High	High	High	High	High	High	High
FALSE	High	Master Protein	NP_001259382.1	uncharacterized protein Dmel_CG34449, isoform E [Drosophila melanogaster]	0.002	12.711	4	5	7	5	1	1052	112.6	9.32	141	5	1.903	1.702	1.589	0.169077	0.306514	0.402461	64.7	110.2	123.2	102.8	29.84	3.07	7.97	12.61	High	High	High	High	High	High	High	High
FALSE	High	Master Protein	NP_733303.2	WD repeat domain 24, isoform C [Drosophila melanogaster]	0.005	6.615	2	2	3	2	1	777	87.1	7.56	109	2	1.903	1.739	2.051	0.28641	0.444346	0.262484	62.9	109.4	119.7	129.1	4.01	0.23	15.09	8.96	High	High	High	High	High	High	High	High
FALSE	High	Master Protein	NP_725341.1	Argonaute-1, isoform A [Drosophila melanogaster]	0.005	6.838	2	3	3	3	1	984	109.8	9.07	58	3	1.902	1.549	1.339	0.141342	0.391382	0.731202	72.4	112.1	137.8	97	3.08	31.02	2.32	16.32	High	High	High	High	High	High	High	High
FALSE	High	Master Protein	NP_477081.1	imaginal disc growth factor 6, isoform A [Drosophila melanogaster]	0	185.089	47	26	112	25	1	452	50.3	7.9	2742	26	1.902	1.532	2.193	0.515186	0.911218	0.406955	66	101.1	125.5	144.7	14.5	21.42	10.13	57.46	High	High	High	High	High	High	High	High
FALSE	Medium	Master Protein	NP_001188759.1	CG3841, isoform B [Drosophila melanogaster]	0.045	2.472	2	1	2	1	1	564	62.7	5.54	57	1	1.902	2.22	9.036	0.728646	0.614001	0.0794521	32.8	72.9	62.4	296.7	19.9	19.46	16.64	45.62	High	High	High	High	High	High	High	High
FALSE	High	Master Protein	NP_001287408.1	GluClalpha, isoform N [Drosophila melanogaster]	0	39.33	14	10	24	10	1	463	52.9	8.72	412	10	1.901	1.546	1.49	0.0174167	0.0356249	0.0483275	71.8	111	136.5	107	2.95	3.56	8.11	7.5	High	High	High	High	High	High	High	High
FALSE	High	Master Protein	NP_001284813.1	vinculin, isoform B [Drosophila melanogaster]	0	183.25	50	48	99	48	1	961	106.2	6.7	2167	48	1.901	1.638	1.33	0.0345227	0.0801005	0.283465	70.1	114.9	133.4	93.3	7.95	13.66	7.24	3.69	High	High	High	High	High	High	High	High
FALSE	High	Master Protein	NP_611667.1	babos, isoform A [Drosophila melanogaster]	0	24.373	23	6	15	6	1	196	20.5	4.7	368	6	1.9	1.581	1.357	0.0192319	0.0356249	0.0825899	74.5	117.8	141.6	101.2	7.78	2.4	2.97	8.55	High	High	High	High	High	High	High	High
FALSE	High	Master Protein	NP_524060.2	hemolectin, isoform A [Drosophila melanogaster]	0	106.999	7	29	45	29	1	3843	426	5.91	874	29	1.9	2.41	2.817	0.138836	0.0795873	0.0628258	54.3	131	103.2	153.1	11.89	18.28	10.3	22.79	High	High	High	High	High	High	High	High
FALSE	High	Master Protein	NP_001303349.1	Proline-rich Akt substrate 40 kDa [Drosophila melanogaster]	0.006	6.33	4	2	4	2	1	562	60.9	5.53	61	2	1.898	1.618	1.439	0.181982	0.392656	0.623332	65.6	106.2	124.5	94.4	19.24	9.76	4.67	21.76	High	High	High	High	High	High	High	High
FALSE	High	Master Protein	NP_001036460.1	uncharacterized protein Dmel_CG12547, isoform A [Drosophila melanogaster]	0.002	11.932	8	4	6	4	1	717	79.7	5.99	103	4	1.898	1.081	1.361	0.595396	1	1	80.1	86.6	152	109.1	21.21	58.51	12.63	10.55	High	High	High	High	High	High	High	High
FALSE	High	Master Protein	NP_723811.1	Two A-associated protein of 42kDa [Drosophila melanogaster]	0.002	11.666	13	5	9	5	1	380	43.3	5.4	42	5	1.897	1.883	1.857	0.651523	0.728397	0.748003	62	116.8	117.6	115.1	21.62	28.02	2.99	28.66	High	High	High	High	High	High	High	High
FALSE	High	Master Protein	NP_648167.1	CG8209 [Drosophila melanogaster]	0	66.189	54	16	32	16	1	331	36.7	6.1	649	16	1.897	1.747	1.644	0.0445404	0.0806726	0.112303	66.2	115.6	125.5	108.8	0.68	17.34	5.03	8.48	High	High	High	High	High	High	High	High
FALSE	High	Master Protein	NP_001261154.1	entomoglyceroporin 4, isoform F [Drosophila melanogaster]	0	21.874	10	4	15	4	1	297	32.4	7.94	435	4	1.896	1.4	1.807	0.0249713	0.140141	0.0480433	70.9	99.2	134.4	128.1	4.52	3.71	2.3	15.7	High	High	High	High	High	High	High	High
FALSE	High	Master Protein	NP_001261794.1	syntaxin 13, isoform B [Drosophila melanogaster]	0	43.47	35	10	34	10	1	284	31.5	7.3	787	10	1.895	1.702	1.344	0.0737554	0.14626	0.503692	72.7	123.7	137.7	97.7	0.44	3.92	6.76	8.04	High	High	High	High	High	High	High	High
FALSE	High	Master Protein	NP_996029.1	peptidoglycan recognition protein LA, isoform F [Drosophila melanogaster]	0	19.742	20	5	10	5	1	299	33.6	9.45	219	5	1.894	2.16	1.852	0.237205	0.182926	0.299326	64.2	138.7	121.6	118.9	3.2	3.96	21.82	19.88	High	High	High	High	High	High	High	High
FALSE	High	Master Protein	NP_647705.1	peptide O-xylosyltransferase [Drosophila melanogaster]	0.002	12.121	4	4	4	4	1	876	99	8.1	70	4	1.894	1.702	1.385	0.0450911	0.0916253	0.282322	72.7	123.7	137.7	100.7	12.42	15.44	6.88	5.27	High	High	High	High	High	High	High	High
FALSE	High	Master Protein	NP_648588.1	nesthocker [Drosophila melanogaster]	0	48.871	25	12	25	12	1	549	60.5	6.29	464	12	1.893	1.533	1.193	0.0927392	0.293964	0.965819	76.5	117.2	144.8	91.2	6.69	17.17	14.27	13.52	High	High	High	High	High	High	High	High
FALSE	High	Master Protein	NP_652046.1	uncharacterized protein Dmel_CG11899 [Drosophila melanogaster]	0	52.501	34	11	19	11	1	364	39.5	8.41	426	11	1.893	1.062	1.471	0.0445404	1	0.192987	78.7	83.6	149	115.7	6.27	18.76	1.67	0.96	High	High	High	High	High	High	High	High
FALSE	Medium	Master Protein	NP_726164.1	uncharacterized protein Dmel_CG30281 [Drosophila melanogaster]	0.049	2.435	3	1	1	1	1	291	33	6.16	40	1	1.893	2.041	2.542	0.122013	0.11233	0.066648	58.4	119.2	110.5	148.4	5.78	3.65	0.78	16.32	High	High	High	High	High	High	High	High
FALSE	Low	Master Protein	NP_649237.1	uncharacterized protein Dmel_CG17637 [Drosophila melanogaster]	0.105	1.476	2	1	1	1	1	504	55.3	6.71	0	1	1.892	3.06	8.856	0.892582	0.52233	0.133166	30.6	93.7	58	271.3	14.81	35.02	33.82	63.46	High	High	High	High	High	High	High	High
FALSE	High	Master Protein	NP_572286.1	CG5966, isoform A [Drosophila melanogaster]	0	18.901	9	4	10	4	1	540	60.3	6.46	357	4	1.892	0.869	1.18	0.621961	1	1	82	71.3	155.2	96.8	22.96	50.27	18.13	25.55	High	High	High	High	High	High	High	High
FALSE	High	Master Protein	NP_611831.2	CG5539, isoform A [Drosophila melanogaster]	0.002	10.743	19	3	4	3	1	296	33.1	5.9	148	3	1.892	3.221	5.461	0.370775	0.108383	0.0568463	38	122.3	71.8	207.4	5.1	23	20.42	6.93	High	High	High	High	High	High	High	High
FALSE	High	Master Protein	NP_476831.1	multi drug resistance 65 [Drosophila melanogaster]	0	108.201	23	25	46	24	1	1302	143.7	6.49	917	25	1.891	1.688	1.761	0.0595473	0.122672	0.107267	67.1	113.2	126.8	118.1	1.22	4.47	4.26	1.62	High	High	High	High	High	High	High	High
FALSE	High	Master Protein	NP_648187.1	ubiquitin conjugating enzyme E2M, isoform A [Drosophila melanogaster]	0.002	13.487	22	6	7	6	1	181	20.7	7.15	70	6	1.889	2.19	1.687	0.264351	0.195443	0.448283	62.6	137.1	118.3	105.6	10.15	8.26	2.36	18.29	High	High	High	High	High	High	High	High
FALSE	High	Master Protein	NP_650925.1	CG3822 [Drosophila melanogaster]	0	25.7	10	9	21	9	1	853	95.8	7.68	275	9	1.889	1.471	1.291	0.0153992	0.0356249	0.0746175	75.8	111.6	143.2	97.9	6.45	3.34	6.27	2.24	High	High	High	High	High	High	High	High
FALSE	High	Master Protein	NP_610292.2	CG2144 [Drosophila melanogaster]	0.003	8.847	3	3	4	2	1	927	104.5	8.57	102	3	1.888	1.545	1.779	0.0469795	0.15039	0.0819987	70.4	108.8	133	125.2	13.81	17.32	0.64	6.67	High	High	High	High	High	High	High	High
FALSE	High	Master Protein	NP_001096870.1	shaggy, isoform M [Drosophila melanogaster]	0	36.166	10	7	15	1	1	772	78.1	8.9	410	7	1.887	4.015	1.824	0.376725		0.462676	50.2	201.4	94.7	91.5	6.39		19.88	33.91	High	High	Not Found	High	High	High	High	High
FALSE	High	Master Protein	NP_001163531.1	dementin, isoform H [Drosophila melanogaster]	0	49.804	18	13	22	13	1	679	72.1	9.11	430	13	1.886	1.597	1.566	0.0870093	0.224997	0.24599	70.9	113.3	133.8	111.1	7.25	5.43	2.76	7.67	High	High	High	High	High	High	High	High
FALSE	High	Master Protein	NP_001285628.1	CG6907, isoform B [Drosophila melanogaster]	0.002	10.75	9	2	3	2	1	437	48.7	5.88	92	2	1.886	1.748	1.632	0.0733562	0.128957	0.176793	68.6	119.9	129.4	112	6.12	13	9.59	15.25	High	High	High	High	High	High	High	High
FALSE	Low	Master Protein	NP_611452.2	uncharacterized protein Dmel_CG16898 [Drosophila melanogaster]	0.069	2.009	2	1	2	1	1	407	47.3	5.88	37	1	1.885	4.922	4.206	0.0433975	0.0224811	0.0195785	36.9	181.6	69.6	155.2	4.12	11.36	6.34	8.18	High	High	High	High	High	High	High	High
FALSE	High	Master Protein	NP_001259133.1	uncharacterized protein Dmel_CG11448, isoform C [Drosophila melanogaster]	0.002	9.695	12	3	3	3	1	486	54.9	4.84	24	3	1.882	1.555	1.419	0.0804517	0.23871	0.381954	72.5	112.8	136.5	103	11.29	6.95	6.65	10.83	High	High	High	High	High	High	High	High
FALSE	High	Master Protein	NP_524586.1	myosin light chain 2 [Drosophila melanogaster]	0	208.022	57	14	265	14	1	222	23.7	4.81	7522	14	1.881	2.351	1.217	0.253193	0.147703	1	67.3	158.2	126.6	81.9	24.7	21.97	4.55	9.53	High	High	High	High	High	High	High	High
FALSE	High	Master Protein	NP_524385.2	cellular repressor of E1A-stimulated genes, isoform A [Drosophila melanogaster]	0	51.86	51	12	37	12	1	211	24	8.25	694	12	1.881	1.525	1.523	0.0783611	0.257941	0.258355	74	112.9	139.2	112.7	7.46	22.44	5.58	9.75	High	High	High	High	High	High	High	High
FALSE	High	Master Protein	NP_651499.2	CG6420, isoform A [Drosophila melanogaster]	0.005	7.01	2	2	2	2	1	909	95.6	7.33	69	2	1.88	1.687	2.062	0.603477	0.830217	0.550808	63.2	106.6	118.8	130.3	63.07	26.36	3.79	5.28	High	High	High	High	High	High	High	High
FALSE	Low	Master Protein	NP_611519.2	uncharacterized protein Dmel_CG15227 [Drosophila melanogaster]	0.078	1.844	4	1	1	1	1	295	34	8.5	22	1	1.88	1.908	2.947	0.332062	0.364052	0.121295	56.5	107.7	106.1	166.4	14.51	6.3	6.17	15.52	High	High	High	High	High	High	High	High
FALSE	High	Master Protein	NP_572495.1	chromatin assembly factor 1, p180 subunit [Drosophila melanogaster]	0	18.229	7	7	7	7	1	1183	133.4	7.03	77	7	1.879	1.331	1.061	0.691883	1	1	59	78.5	110.9	62.6	22.7	22.27	11.62	17.08	High	High	High	High	High	High	High	High
FALSE	High	Master Protein	NP_726788.1	CG4199, isoform C [Drosophila melanogaster]	0	54.133	24	17	28	17	1	593	65	6.21	481	17	1.878	1.773	1.599	0.0452156	0.0759054	0.125986	69.6	123.4	130.7	111.2	9.03	16.23	2.38	7.13	High	High	High	High	High	High	High	High
FALSE	High	Master Protein	NP_731964.2	uncharacterized protein Dmel_CG42788, isoform B [Drosophila melanogaster]	0.002	11.422	3	4	5	4	1	1560	168.2	6.62	70	4	1.877	1.453	1.885	0.522193	0.979137	0.576409	64.2	93.2	120.4	120.9	23.93	14.23	11.71	1.85	High	High	High	High	High	High	High	High
FALSE	High	Master Protein	NP_001262932.1	nicastrin, isoform E [Drosophila melanogaster]	0.002	11.498	6	4	5	4	1	699	78.3	6.14	68	4	1.876	1.2	1.362	0.125688	1	0.622038	79.8	95.7	149.7	108.7	17.51	23.47	7.91	4.62	High	High	High	High	High	High	High	High
FALSE	High	Master Protein	NP_608531.1	translocator protein [Drosophila melanogaster]	0	16.873	9	1	19	1	1	185	20.1	9.45	539	1	1.876	1.17	2.131	0.221105	1	0.172592	69	80.7	129.5	147.1	3.48	17.75	0.1	17.44	High	High	High	High	High	High	High	High
FALSE	High	Master Protein	NP_477395.1	coat protein (coatomer) alpha, isoform A [Drosophila melanogaster]	0	71.583	16	17	33	17	1	1234	139.2	7.65	655	17	1.875	1.682	1.665	0.0624467	0.128479	0.141438	68.5	115.3	128.5	114.1	0.52	13.09	15.21	6.75	High	High	High	High	High	High	High	High
FALSE	High	Master Protein	NP_996002.2	uncharacterized protein Dmel_CG18769, isoform G [Drosophila melanogaster]	0	86.493	29	21	67	21	1	443	50.7	9.04	1104	21	1.875	1.707	1.613	0.053923	0.1026	0.14249	68.2	116.5	127.9	110.1	7.71	2.16	4.86	11.29	High	High	High	High	High	High	High	High
FALSE	Low	Master Protein	NP_611696.2	uncharacterized protein Dmel_CG30195 [Drosophila melanogaster]	0.065	2.094	6	1	1	1	1	153	17.4	9.11	22	1	1.874	1.519	1.624	0.345053	0.732889	0.606445	68.7	104.3	128.7	111.6	9.82	47.23	15.79	2.39	High	High	High	High	High	High	High	High
FALSE	High	Master Protein	NP_001261159.1	transmembrane 4 superfamily, isoform C [Drosophila melanogaster]	0	52.01	17	8	28	8	1	292	32.9	8.95	392	8	1.874	1.77	1.838	0.181915	0.267442	0.230737	64.8	114.6	121.4	119.1	10.16	4.98	16.89	1.37	High	High	High	High	High	High	High	High
FALSE	High	Master Protein	NP_733389.2	CG2246, isoform A [Drosophila melanogaster]	0	17.855	18	5	6	5	1	406	44.8	8.21	154	5	1.874	1.444	1.559	0.0218385	0.0794599	0.0600275	72.4	104.6	135.7	112.9	3.36	11.94	6.45	4.75	High	High	High	High	High	High	High	High
FALSE	High	Master Protein	NP_001036462.1	uncharacterized protein Dmel_CG17528, isoform D [Drosophila melanogaster]	0.002	11.921	5	3	3	3	1	748	82.9	7.77	37	3	1.873	1.861	1.555	0.165638	0.20036	0.412999	68.1	126.7	127.5	105.8	0.85	29.28	9	19.18	High	High	High	High	High	High	High	High
FALSE	High	Master Protein	NP_001246866.1	regeneration, isoform B [Drosophila melanogaster]	0	42.574	16	14	19	14	1	808	98.2	9.22	251	14	1.873	1.728	1.304	0.0609045	0.107742	0.508519	71.9	124.3	134.7	93.8	0.53	18.17	2.23	1.77	High	High	High	High	High	High	High	High
FALSE	Medium	Master Protein	NP_649819.1	uncharacterized protein Dmel_CG11760 [Drosophila melanogaster]	0.024	3.475	5	1	2	1	1	149	17	8.25	20	1	1.873	1.773	1.595	0.0626224	0.100478	0.167596	69.2	122.7	129.7	110.4	18.95	4.47	8.98	3.6	High	High	High	High	High	High	High	High
FALSE	High	Master Protein	NP_573062.1	magnetic receptor, isoform A [Drosophila melanogaster]	0	20.701	42	5	6	5	1	130	14.1	9.13	206	5	1.872	1.234	0.802	0.484439	1	1	85.2	105.2	159.6	68.4	8.94	35.93	8.43	44.43	High	High	High	High	High	High	High	High
FALSE	High	Master Protein	NP_001286784.1	CG5554, isoform B [Drosophila melanogaster]	0	68.77	30	14	50	14	1	330	37.2	4.68	904	14	1.872	1.488	1.528	0.286581	0.706921	0.648283	66.9	99.5	125.3	102.2	8.63	10.34	16.22	33.55	High	High	High	High	High	High	High	High
FALSE	High	Master Protein	NP_724679.2	maltase A6, isoform D [Drosophila melanogaster]	0	64.913	30	18	44	18	1	601	67.9	5	1148	18	1.872	5.009	10.848	0.772481	0.164853	0.0710546	25.3	126.8	47.4	274.6	5.75	51.25	16.47	65	High	High	High	High	High	High	High	High
FALSE	High	Master Protein	NP_524040.2	ADP-ribosylation factor GTPase activating protein 1, isoform A [Drosophila melanogaster]	0	20.08	11	5	7	5	1	468	50.5	7.37	165	5	1.87	1.99	2.061	0.11666	0.111614	0.106381	62.4	124.2	116.7	128.6	7.05	2.28	13.46	14.2	High	High	High	High	High	High	High	High
FALSE	Medium	Master Protein	NP_001138109.1	5PtaseI, isoform F [Drosophila melanogaster]	0.038	2.762	2	2	2	2	1	786	88.5	5.62	33	2	1.87	1.032	1.497	0.152078	1	0.455212	80	82.6	149.6	119.7	0.87	33.85	10.25	1.32	High	High	High	High	High	High	High	High
FALSE	High	Master Protein	NP_001247036.1	selenoprotein R, isoform J [Drosophila melanogaster]	0.004	7.264	10	3	4	2	1	192	21.6	9.11	82	3	1.87	1.611	1.448	0.432233	0.723034	0.913569	70.8	114.1	132.4	102.5	16.33	34.14	17.37	13.2	High	High	High	High	High	High	High	High
FALSE	High	Master Protein	NP_610477.2	mitotic arrest-deficient 1 [Drosophila melanogaster]	0.002	13.708	7	5	7	5	1	730	85	6.49	138	5	1.87	1.951	1.471	0.0664046	0.0750244	0.265508	64.9	126.6	121.3	95.4	0.03	0.98	0.98	7.25	High	High	High	High	High	High	High	High
FALSE	High	Master Protein	NP_649859.1	uncharacterized protein Dmel_CG11982 [Drosophila melanogaster]	0	19.455	22	5	6	5	1	380	40.3	4.79	256	5	1.869	2.615	2.719	0.223787	0.0963434	0.0923732	53.6	140.1	100.2	145.7	32.53	24.19	0.93	12.59	High	High	High	High	High	High	High	High
FALSE	High	Master Protein	NP_523380.2	regulator of G-protein signalling 7, isoform A [Drosophila melanogaster]	0	21.897	12	7	7	7	1	647	70.1	8.6	130	7	1.869	1.543	2.002	0.28271	0.623484	0.262972	66.4	102.4	124	132.9	7.68	0.29	22.37	16	High	High	High	High	High	High	High	High
FALSE	High	Master Protein	NP_524625.3	Eph receptor tyrosine kinase, isoform C [Drosophila melanogaster]	0.006	5.655	2	2	3	2	1	1096	123.2	6.87	88	2	1.869	1.601	1.537	0.170135	0.373723	0.43996	72.3	115.8	135.1	111.2	15.2	14.77	17.62	5.61	High	High	High	High	High	High	High	High
FALSE	High	Master Protein	NP_001097030.1	Vav guanine nucleotide exchange factor, isoform C [Drosophila melanogaster]	0.002	10.293	4	4	6	4	1	1001	113.5	6.33	95	4	1.868	1.662	1.583	0.0500672	0.107055	0.143091	70.5	117.3	131.8	111.7	8.59	9.46	10.97	6.78	High	High	High	High	High	High	High	High
FALSE	High	Master Protein	NP_001287568.1	tau, isoform M [Drosophila melanogaster]	0	54.352	38	14	31	2	1	367	39.2	9.64	422	14	1.868	2.478	1.793	0.492533	0.272989	0.607125	59.6	147.7	111.4	106.9	15.23	31.19	9.69	29.95	High	High	High	High	High	High	High	High
FALSE	Low	Master Protein	NP_001027157.2	PFTAIRE-interacting factor 1A, isoform I [Drosophila melanogaster]	0.13	1.237	1	1	1	1	1	796	90.4	5.74	0	1	1.868	1.837	2.361	0.0699787	0.0962166	0.0533513	62.2	114.2	116.1	146.7	15.87	7.47	4.41	4.67	High	High	High	High	High	High	High	High
FALSE	High	Master Protein	NP_476849.1	Src oncogene at 42A, isoform A [Drosophila melanogaster]	0	58.752	32	15	26	14	1	517	59	6.68	596	15	1.867	1.545	1.536	0.0242586	0.0707701	0.0794521	71.5	110.5	133.5	109.8	1.27	11.66	9.18	1.78	High	High	High	High	High	High	High	High
FALSE	High	Master Protein	NP_724091.1	CG5758, isoform B [Drosophila melanogaster]	0.002	10.263	5	3	5	3	1	625	70.5	6.32	55	3	1.867	1.461	1.703	0.366213	0.836773	0.542766	70.7	103.3	132	120.4	8.93	40.06	3.58	7.31	High	High	High	High	High	High	High	High
FALSE	High	Master Protein	NP_524938.1	cytokine induced apoptosis inhibitor 1 [Drosophila melanogaster]	0.003	9.234	17	2	2	2	1	248	27.1	5.21	110	2	1.867	2.232	1.689	0.107651	0.0734167	0.200748	63.2	141.1	118	106.8	4.12	10.41	15.51	1.65	High	High	High	High	High	High	High	High
FALSE	High	Master Protein	NP_573357.1	Mec2 [Drosophila melanogaster]	0	80.17	34	14	77	13	1	350	38.6	5.25	2046	14	1.867	0.9	1.819	0.063721	1	0.0957145	76.1	68.5	142	138.3	1.88	10.46	0.08	1.47	High	High	High	High	High	High	High	High
FALSE	High	Master Protein	NP_523517.1	alien, isoform B [Drosophila melanogaster]	0.006	5.97	5	2	2	2	1	444	51.5	5.62	55	2	1.866	1.975	2.179	0.24023	0.235221	0.172592	60.9	120.2	113.6	132.7	2.7	17.62	22.16	12.92	High	High	High	High	High	High	High	High
FALSE	High	Master Protein	NP_611350.1	Autophagy-related 7, isoform A [Drosophila melanogaster]	0.002	8.996	6	3	4	3	1	684	76.7	6.1	84	3	1.866	1.347	1.631	0.604969	1	0.866308	67.5	90.9	125.9	110.1	40.91	14.59	10.5	13.64	High	High	High	High	High	High	High	High
FALSE	Medium	Master Protein	NP_732899.1	regulatory particle non-ATPase 9, isoform B [Drosophila melanogaster]	0.041	2.664	2	1	1	1	1	382	43.7	5.26	35	1	1.865	1.35	1.352	0.583178	1	1	73.3	98.9	136.6	99.1	35.19	49.37	10.01	8.43	High	High	High	High	High	High	High	High
FALSE	High	Master Protein	NP_610169.1	uncharacterized protein Dmel_CG10417, isoform A [Drosophila melanogaster]	0	52.292	22	11	23	11	1	662	72.3	4.58	669	11	1.865	1.486	1.026	0.0702467	0.263221	1	79.2	117.7	147.7	81.3	5.34	17.45	1.57	3.65	High	High	High	High	High	High	High	High
FALSE	High	Master Protein	NP_649898.1	CG8149 [Drosophila melanogaster]	0	19.229	19	7	9	7	1	308	32.9	6.24	70	7	1.863	1.891	1.366	0.461884	0.505042	1	67.3	127.2	125.3	91.9	1.94	35.14	8.44	0.79	High	High	High	High	High	High	High	High
FALSE	High	Master Protein	NP_996372.1	CG2258, isoform B [Drosophila melanogaster]	0	47.391	13	12	19	12	1	801	89.2	5.33	472	12	1.863	1.32	1.374	0.189778	0.847759	0.732214	75.2	99.3	140.1	103.4	8.63	18.03	4.39	26.43	High	High	High	High	High	High	High	High
FALSE	High	Master Protein	NP_001260646.1	CG9338, isoform B [Drosophila melanogaster]	0.002	14.27	22	3	10	3	1	147	15.7	6.42	272	3	1.862	2.186	1.461	0.053575	0.0422565	0.221248	64.6	141.2	120.3	94.4	8.55	14.57	2.29	1.41	High	High	High	High	High	High	High	High
FALSE	High	Master Protein	NP_001261435.1	CG4603, isoform B [Drosophila melanogaster]	0	19.51	21	5	7	5	1	371	40.6	4.82	348	5	1.862	1.97	1.847	0.0497543	0.0526762	0.0738648	61.6	121.3	114.6	113.7	13.8	0.48	1.81	0.39	High	High	High	High	High	High	High	High
FALSE	High	Master Protein	NP_001260594.1	Leukocyte-antigen-related-like, isoform F [Drosophila melanogaster]	0	42.097	8	15	26	1	1	2032	229.2	7.02	303	15	1.862	2.103	1.203	0.909643	0.872399	1	66.8	140.5	124.4	80.4	73.97	50.47	15.04	15.39	High	High	High	High	High	High	High	High
FALSE	Medium	Master Protein	NP_611113.1	CG7747 [Drosophila melanogaster]	0.022	3.575	2	1	1	1	1	517	58.9	8.13	42	1	1.862	1.599	1.131	0.336205	0.618774	1	70.7	113.1	131.7	80	15.81	22.09	3.19	6.26	High	High	High	High	High	High	High	High
FALSE	High	Master Protein	NP_609429.1	uncharacterized protein Dmel_CG17097 [Drosophila melanogaster]	0	69.937	14	16	33	16	1	1087	120.5	8.62	712	16	1.861	3.994	17.091	0.0850429	0.0280995	0.018086	19.9	79.6	37.1	340.7	4.85	10.35	15.67	0.05	High	High	High	High	High	High	High	High
FALSE	High	Master Protein	NP_651894.3	septin interacting protein 3, isoform A [Drosophila melanogaster]	0	15.54	9	3	9	3	1	626	69.2	6.1	248	3	1.86	2.218	2.366	0.351526	0.239366	0.201365	57.1	126.6	106.2	135.1	9.95	15.48	7.16	24.35	High	High	High	High	High	High	High	High
FALSE	High	Master Protein	NP_524356.1	heat shock protein cognate 4, isoform A [Drosophila melanogaster]	0	609.977	90	70	978	56	1	651	71.1	5.52	18741	70	1.859	1.413	1.799	0.0218385	0.10073	0.0406697	69.6	98.3	129.3	125.1	3.05	4.62	1.34	0.89	High	High	High	High	High	High	High	High
FALSE	Low	Master Protein	NP_608607.2	hattifattener, isoform C [Drosophila melanogaster]	0.089	1.68	1	1	1	1	1	982	104.2	9.17	21	1	1.859	2.154	0.953	0.558219	0.439423	1	72.1	155.3	134	68.7	63.14	1.01	0.19	4.62	High	High	High	High	High	High	High	High
FALSE	High	Master Protein	NP_609154.1	CG7115, isoform B [Drosophila melanogaster]	0.002	13.603	10	4	10	4	1	524	58	8.84	190	4	1.858	2.466	1.882	0.106726	0.0526973	0.132578	58.1	143.3	108	109.4	5.3	6.42	12.34	13.85	High	High	High	High	High	High	High	High
FALSE	High	Master Protein	NP_611254.2	CG4984, isoform A [Drosophila melanogaster]	0	50.061	20	10	51	10	1	440	50.6	8.87	860	10	1.858	1.646	1.178	0.0218385	0.0433478	0.497659	75	123.4	139.2	88.3	1.76	10.38	2.69	7.54	High	High	High	High	High	High	High	High
FALSE	High	Master Protein	NP_001262715.1	uncharacterized protein Dmel_CG18208, isoform B [Drosophila melanogaster]	0.002	10.394	3	2	6	2	1	740	80	9.1	131	2	1.857	1.651	1.658	0.320406	0.539047	0.526655	67	110.7	124.5	111.1	13.92	4.03	7.33	3.13	High	High	High	High	High	High	High	High
FALSE	High	Master Protein	NP_609191.1	Post-GPI attachment to proteins 5, isoform B [Drosophila melanogaster]	0.004	8.096	8	3	5	3	1	370	43.3	8.07	70	3	1.856	1.42	1.865	0.23097	0.718366	0.266695	68.7	97.5	127.4	128	5.87	33.36	0.18	17.08	High	High	High	High	High	High	High	High
FALSE	High	Master Protein	NP_651237.1	Phenylalanyl-tRNA synthetase, beta-subunit [Drosophila melanogaster]	0	52.315	27	14	24	14	1	589	65.7	6.04	490	14	1.856	1.635	1.205	0.0717887	0.160094	0.853013	74	120.9	137.3	89.1	5.07	14.09	8.21	10.68	High	High	High	High	High	High	High	High
FALSE	High	Master Protein	NP_001097564.1	Inhibitor-2, isoform B [Drosophila melanogaster]	0.002	14.639	22	4	6	4	1	310	34.4	5.26	68	4	1.855	2.066	1.88	0.627914	0.557576	0.679419	60.9	125.8	112.9	114.4	13.93	47.99	13.05	7.16	High	High	High	High	High	High	High	High
FALSE	High	Master Protein	NP_609568.3	organic anion transporting polypeptide 33Ea, isoform A [Drosophila melanogaster]	0	17.438	7	5	5	5	1	745	83.1	8.02	173	5	1.855	1.472	1.439	0.0870093	0.320073	0.358404	74.2	109.1	137.6	106.7	4.12	9.18	14.83	11.38	High	High	High	High	High	High	High	High
FALSE	High	Master Protein	NP_723319.1	LanB1, isoform B [Drosophila melanogaster]	0	133.268	15	29	75	29	1	1788	198.2	5.33	1971	29	1.855	1.661	1.065	0.161456	0.300648	1	74.1	123.1	137.5	79	0.73	6.9	7.39	7.04	High	High	High	High	High	High	High	High
FALSE	High	Master Protein	NP_647947.1	charged multivesicular body protein 2b [Drosophila melanogaster]	0	27.35	29	8	16	8	1	212	23.8	5.95	295	8	1.855	2.669	1.687	0.342581	0.140459	0.52255	59.9	159.8	111.1	101	2.78	28.6	13.87	19.01	High	High	High	High	High	High	High	High
FALSE	Medium	Master Protein	NP_732891.1	uncharacterized protein Dmel_CG31413 [Drosophila melanogaster]	0.031	3.206	2	1	1	1	1	561	64.6	8.85	19	1	1.855	2.106	5.139	0.244942	0.188117	0.0412641	44.7	94	82.8	229.4	33.38	15.02	7.29	21.78	High	High	High	High	High	High	High	High
FALSE	High	Master Protein	NP_573394.1	immune deficiency, isoform A [Drosophila melanogaster]	0.004	7.584	11	2	3	2	1	273	29.9	6.23	103	2	1.853	1.727	2.373	0.195405	0.301183	0.111491	61.4	106.1	113.8	145.7	20.6	3.56	5.12	3.19	High	High	High	High	High	High	High	High
FALSE	High	Master Protein	NP_001189048.2	uncharacterized protein Dmel_CG43367, isoform C [Drosophila melanogaster]	0.002	9.783	1	5	5	5	1	2754	309.4	6.01	54	5	1.853	1.789	1.887	0.132073	0.183461	0.153857	67	119.9	124.2	126.5	5.29	7.89	8.89	2.16	High	High	High	High	High	High	High	High
FALSE	High	Master Protein	NP_647763.1	CG1271, isoform A [Drosophila melanogaster]	0	19.336	12	8	12	8	1	556	62	7.18	126	8	1.853	1.769	1.524	0.0362071	0.0548141	0.121277	71.2	125.9	131.9	108.5	7.18	16.7	6.89	5.35	High	High	High	High	High	High	High	High
FALSE	High	Master Protein	NP_001261233.1	glucose transporter 1, isoform R [Drosophila melanogaster]	0	45.975	12	11	53	7	1	802	89.6	6.33	969	11	1.852	1.709	1.572	0.0275694	0.047965	0.0794521	70.5	120.5	130.5	110.8	2.15	12.74	10.56	3.81	High	High	High	High	High	High	High	High
FALSE	High	Master Protein	NP_728267.1	Tao, isoform D [Drosophila melanogaster]	0	40.439	14	17	21	17	1	1039	118.2	8.4	152	17	1.851	1.799	1.37	0.0904659	0.128479	0.477886	70.6	127.1	130.7	96.8	5.34	8.25	3.64	0.72	High	High	High	High	High	High	High	High
FALSE	High	Master Protein	NP_609093.1	mitochondrial magnesium exporter 1 [Drosophila melanogaster]	0.002	13.861	9	3	16	2	1	299	32.4	9.64	426	3	1.85	0.692	1.57	0.30346	0.771656	0.598051	82.9	57.3	153.3	130.1	14.55	12.7	6.41	37.08	High	High	High	High	High	High	High	High
FALSE	Low	Master Protein	NP_001188822.1	uncharacterized protein Dmel_CG31808 [Drosophila melanogaster]	0.069	1.997	13	1	1	1	1	56	6.5	10.9	25	1	1.85	2.43	2.171	0.0400833	0.0320644	0.0414859	60.3	146.4	111.5	130.8	3.89	10.72	7.05	16.07	High	High	High	High	High	High	High	High
FALSE	High	Master Protein	NP_724718.1	G protein gamma 1, isoform A [Drosophila melanogaster]	0.003	8.137	31	3	3	3	1	70	8.1	6	52	3	1.848	1.594	1.606	0.696244	0.963162	0.946802	69.1	110.1	127.6	110.9	1.17	32.1	6.1	22.26	High	High	High	High	High	High	High	High
FALSE	High	Master Protein	NP_524431.2	ebony [Drosophila melanogaster]	0.006	6.152	5	3	3	3	1	879	98.5	5.78	42	3	1.848	1.211	0.961	0.393149	1	1	89.3	108.2	165.1	85.8	7.59	28.12	19.83	2.3	High	High	High	High	High	High	High	High
FALSE	High	Master Protein	NP_726992.2	spoonbill, isoform C [Drosophila melanogaster]	0	42.804	15	10	28	10	1	607	67.3	6.79	470	10	1.847	2.21	1.795	0.169294	0.108383	0.222514	57.8	127.7	106.8	103.8	7.91	8.91	0.83	7.98	High	High	High	High	High	High	High	High
FALSE	High	Master Protein	NP_724888.2	14-3-3zeta, isoform F [Drosophila melanogaster]	0	75.524	69	15	44	2	1	248	28.3	5.11	1060	15	1.846	1.285	0.915	0.741048	1	1	82.1	105.5	151.5	75.1	47.06	35.47	0.77	29.28	High	High	High	High	High	High	High	High
FALSE	High	Master Protein	NP_524543.1	heterogeneous nuclear ribonucleoprotein at 98DE, isoform B [Drosophila melanogaster]	0	56.439	33	12	46	10	1	365	39	9.03	990	12	1.846	1.838	2.332	0.121795	0.149478	0.0757863	59.3	109.1	109.5	138.4	1.37	2.12	20.25	4.37	High	High	High	High	High	High	High	High
FALSE	High	Master Protein	NP_650844.1	Rho GTPase activating protein at 92B, isoform A [Drosophila melanogaster]	0.002	14.231	7	4	6	4	1	740	83	8.46	141	4	1.844	2.043	1.927	0.053923	0.0487524	0.0662577	62.9	128.5	116	121.2	2.01	3.25	1.92	6.7	High	High	High	High	High	High	High	High
FALSE	Low	Master Protein	NP_733352.3	uncharacterized protein Dmel_CG31028 [Drosophila melanogaster]	0.088	1.696	1	1	1	1	1	1154	129.3	8.02	0	1	1.844	2.139	1.82	0.18616	0.131714	0.231232	63	134.8	116.2	114.6	18.25	4.36	7.82	23.86	High	High	High	High	High	High	High	High
FALSE	High	Master Protein	NP_476901.1	brainiac [Drosophila melanogaster]	0.006	5.915	5	1	2	1	1	325	37.6	7.65	55	1	1.844	1.541	1.023	0.877888	1	1	66.7	102.8	123	68.2	40.63	14.75	79.17	20.19	High	High	High	High	High	High	High	High
FALSE	Medium	Master Protein	NP_001259885.1	CG7295, isoform B [Drosophila melanogaster]	0.019	3.792	5	1	3	1	1	305	34.5	4.49	104	1	1.844	2.432	3.269	0.527222	0.297936	0.159308	51.9	126.3	95.7	169.7	49.23	6.63	6.67	27.63	High	High	High	High	High	High	High	High
FALSE	High	Master Protein	NP_511055.1	multiple inositol polyphosphate phosphatase 2 [Drosophila melanogaster]	0.002	14.827	9	3	5	3	1	453	52.7	7.36	145	3	1.844	1.616	1.375	0.192526	0.377956	0.72339	74.1	119.8	136.6	101.9	3.39	11.75	29.56	22.09	High	High	High	High	High	High	High	High
FALSE	High	Master Protein	NP_723454.1	excitatory amino acid transporter 1, isoform B [Drosophila melanogaster]	0	73.781	18	9	99	9	1	479	52.3	6.43	2402	9	1.843	1.19	1.359	0.0435345	0.72974	0.27981	79.7	94.9	147	108.3	4.83	12.51	7.72	9.62	High	High	High	High	High	High	High	High
FALSE	Medium	Master Protein	NP_651099.1	Ubiquitin-specific protease 12/46 [Drosophila melanogaster]	0.022	3.551	2	1	3	1	1	424	47.2	7.08	101	1	1.842	1.137	1.785	0.978149	1	1	80.3	91.3	148	143.4	4.57	81.65	19.46	6.04	High	High	High	High	High	High	High	High
FALSE	High	Master Protein	NP_726103.1	uncharacterized protein Dmel_CG30285 [Drosophila melanogaster]	0.003	9.112	14	1	4	1	1	112	12	6.09	151	1	1.842	1.852	1.571	0.246966	0.282553	0.509861	64.6	119.7	119	101.5	12.97	10.55	4.88	6.03	High	High	High	High	High	High	High	High
FALSE	High	Master Protein	NP_001246651.1	multiplexin, isoform R [Drosophila melanogaster]	0.004	7.584	2	1	3	1	1	1039	109.6	5.94	120	1	1.84	1.01	1.883	0.694927	1	0.731202	69.6	70.3	128.1	131.1	68.91	11.99	2.75	19.8	High	High	High	High	High	High	High	High
FALSE	High	Master Protein	NP_524661.1	CDP diglyceride synthetase, isoform A [Drosophila melanogaster]	0	83.339	11	8	59	8	1	447	51.5	7.36	1896	8	1.839	1.678	1.493	0.0156152	0.0224811	0.034933	68.9	115.6	126.7	102.9	0.15	0.13	1.81	1.77	High	High	High	High	High	High	High	High
FALSE	High	Master Protein	NP_001188923.1	CG6701, isoform B [Drosophila melanogaster]	0	18.176	5	6	7	6	1	1333	151	9	76	6	1.839	2.056	1.873	0.139212	0.111274	0.159991	61.7	126.7	113.4	115.5	24.06	1.9	17.14	2.81	High	High	High	High	High	High	High	High
FALSE	High	Master Protein	NP_649732.1	pyd3 [Drosophila melanogaster]	0	27.579	23	7	13	7	1	386	43.8	6.86	320	7	1.838	1.562	1.23	0.129044	0.31367	0.919018	76.6	119.6	140.8	94.2	12.34	28.87	6.36	7.69	High	High	High	High	High	High	High	High
FALSE	High	Master Protein	NP_651199.2	uncharacterized protein Dmel_CG31140, isoform A [Drosophila melanogaster]	0	22.62	5	7	11	7	1	1564	171.6	6.55	188	7	1.837	1.596	1.408	0.394285	0.671705	0.912424	72.4	115.5	133	101.9	10.11	49.66	0.29	12.98	High	High	High	High	High	High	High	High
FALSE	High	Master Protein	NP_729448.1	arginine kinase, isoform C [Drosophila melanogaster]	0	474.136	82	51	612	5	1	396	43.7	6.18	14175	51	1.836	1.18	1.218	0.604969	1	1	82.8	97.7	152.1	100.9	24.88	0.05	10.05	53.73	High	High	High	High	High	High	High	High
FALSE	Medium	Master Protein	NP_648957.1	CG7724 [Drosophila melanogaster]	0.028	3.37	4	2	3	2	1	398	44.8	8.63	0	2	1.836	1.844	1.498	0.151115	0.179071	0.43089	69.5	128.1	127.5	104	15.01	20.78	7.73	1.55	High	High	High	High	High	High	High	High
FALSE	High	Master Protein	NP_651665.2	cullin 5 [Drosophila melanogaster]	0.006	6.009	3	3	3	3	1	852	96.9	8.34	49	3	1.836	1.498	1.7	0.0746797	0.251889	0.14146	71.5	107.1	131.2	121.5	8.49	8.47	0.07	14.6	High	High	High	High	High	High	High	High
FALSE	Low	Master Protein	NP_001036415.2	light, isoform F [Drosophila melanogaster]	0.053	2.312	1	1	1	1	1	841	96.9	6.89	36	1	1.836	1.533	1.335	0.11666	0.31366	0.622038	70.5	108.1	129.4	94.1	4.96	23.44	9.2	5.83	High	High	High	High	High	High	High	High
FALSE	High	Master Protein	NP_001097259.2	slowpoke 2, isoform D [Drosophila melanogaster]	0.006	6.134	1	2	2	2	1	1878	205.1	7.42	48	2	1.836	1.604	1.551	0.206822	0.4081	0.462676	69.5	111.5	127.6	107.8	13.33	4.52	2.53	0.11	High	High	High	High	High	High	High	High
FALSE	High	Master Protein	NP_729053.2	uncharacterized protein Dmel_CG10671, isoform B [Drosophila melanogaster]	0	18.282	10	6	19	6	1	480	54.6	10.02	352	6	1.835	1.784	1.237	0.0414783	0.0587398	0.527112	72.7	129.7	133.4	90	1.68	9.79	5.5	16.65	High	High	High	High	High	High	High	High
FALSE	High	Master Protein	NP_649979.1	CG3940, isoform A [Drosophila melanogaster]	0	38.426	18	8	33	8	1	304	33.9	5.16	790	8	1.835	1.466	1.866	0.0445404	0.173375	0.0628258	70.8	103.9	130	132.2	0.48	6.9	9.45	16.81	High	High	High	High	High	High	High	High
FALSE	High	Master Protein	NP_524449.1	neurexin 1, isoform A [Drosophila melanogaster]	0	97.906	11	20	41	20	1	1837	199.2	7.15	842	20	1.834	1.51	1.535	0.101376	0.304676	0.277482	72.8	109.9	133.6	111.8	11.92	15.53	8.61	1.83	High	High	High	High	High	High	High	High
FALSE	High	Master Protein	NP_651959.1	malic enzyme b, isoform A [Drosophila melanogaster]	0	141.046	36	27	106	2	1	617	68.6	6.71	2234	27	1.834	1.411	1.431	0.266532	0.768695	0.735816	73.9	104.2	135.5	105.7	6.47	21.59	0.86	8.43	High	High	High	High	High	High	High	High
FALSE	High	Master Protein	NP_611410.1	endophilin B, isoform A [Drosophila melanogaster]	0	57.835	38	15	34	15	1	390	43.6	6.09	813	15	1.834	1.288	1.559	0.0407127	0.379008	0.113551	74.9	96.5	137.3	116.8	7.75	3.73	4.1	2.6	High	High	High	High	High	High	High	High
FALSE	High	Master Protein	NP_001163511.1	pollux, isoform C [Drosophila melanogaster]	0.005	6.824	2	3	3	3	1	1572	175	7.59	34	3	1.834	1.645	1.655	0.257949	0.444346	0.433222	68.3	112.3	125.2	113	12.02	27.87	5.29	5.43	High	High	High	High	High	High	High	High
FALSE	High	Master Protein	NP_647621.1	CTP:phosphocholine cytidylyltransferase 1, isoform A [Drosophila melanogaster]	0.002	14.416	12	4	6	4	1	526	58.2	5.99	223	4	1.833	1.762	1.762	0.233884	0.31728	0.315445	65.4	115.1	119.8	115.2	9.37	26.96	5.2	11.42	High	High	High	High	High	High	High	High
FALSE	High	Master Protein	NP_572568.1	ribosomal protein S28b, isoform A [Drosophila melanogaster]	0	27.397	65	7	19	7	1	65	7.5	10.37	471	7	1.833	1.718	1.364	0.319453	0.454586	0.905708	71.5	122.8	131	97.5	24.43	32.47	12.7	4.37	High	High	High	High	High	High	High	High
FALSE	High	Master Protein	NP_652028.1	kermit, isoform A [Drosophila melanogaster]	0.002	10.194	17	4	5	4	1	336	36.8	6.3	84	4	1.833	1.748	2.214	0.195539	0.276615	0.130352	64.6	112.9	118.3	142.9	6.63	3.42	10.94	0.57	High	High	High	High	High	High	High	High
FALSE	High	Master Protein	NP_651977.1	secretory 13, isoform A [Drosophila melanogaster]	0.002	13.625	12	4	4	4	1	356	39.5	6.25	145	4	1.832	1.542	1.49	0.452712	0.796297	0.856302	72.9	112.3	133.5	108.5	4.4	43.4	3.68	29.66	High	High	High	High	High	High	High	High
FALSE	High	Master Protein	NP_476929.1	NAD-dependent methylenetetrahydrofolate dehydrogenase, isoform B [Drosophila melanogaster]	0	35.033	43	11	18	11	1	309	33.5	7.52	299	11	1.832	1.077	1.462	0.0167214	0.855083	0.0457359	80.3	86.5	147.1	117.4	4.1	0.03	4.74	7.46	High	High	High	High	High	High	High	High
FALSE	High	Master Protein	NP_650858.1	phagocyte signaling impaired [Drosophila melanogaster]	0	22.164	9	8	10	8	1	948	109	6.95	106	8	1.831	1.165	1.743	0.368611	1	0.481419	70.5	82.1	129.1	122.9	15.09	23.24	18.95	38.68	High	High	High	High	High	High	High	High
FALSE	High	Master Protein	NP_524400.2	pyrroline 5-carboyxlate reductase [Drosophila melanogaster]	0.003	8.409	9	2	4	2	1	280	29.6	7.44	179	2	1.831	2.015	2.294	0.175135	0.146216	0.103938	59.6	120.1	109	136.7	0.91	6.4	11.59	20.03	High	High	High	High	High	High	High	High
FALSE	Low	Master Protein	NP_001246282.1	Sin3A, isoform G [Drosophila melanogaster]	0.086	1.722	0	1	1	1	1	2066	220.9	8.15	20	1	1.83	1.515	1.121	0.729116	1	1	73.1	110.8	133.8	82	6.11	31.74	43.45	30.78	High	High	High	High	High	High	High	High
FALSE	High	Master Protein	NP_524634.2	apolipophorin, isoform A [Drosophila melanogaster]	0	1204.17	46	198	910	198	1	3351	372.4	7.97	18458	198	1.829	1.07	1.385	0.112243	1	0.499427	81	86.7	148.2	112.2	7.17	8.34	1.01	21.84	High	High	High	High	High	High	High	High
FALSE	High	Master Protein	NP_001259175.1	phosphogluconate dehydrogenase, isoform B [Drosophila melanogaster]	0	63.847	23	13	50	13	1	481	52.5	6.32	1234	13	1.829	1.056	1.698	0.0551565	1	0.102615	77.6	81.9	141.8	131.7	2.33	19.12	6.52	7.95	High	High	High	High	High	High	High	High
FALSE	High	Master Protein	NP_609486.2	Ge-1, isoform A [Drosophila melanogaster]	0	23.71	5	8	14	8	1	1354	149.2	5.9	261	8	1.828	1.668	1.888	0.284079	0.453566	0.294383	63.2	105.3	115.5	119.2	10.26	26.52	8.05	31.96	High	High	High	High	High	High	High	High
FALSE	Medium	Master Protein	NP_649272.1	uncharacterized protein Dmel_CG11037 [Drosophila melanogaster]	0.036	2.87	3	1	1	1	1	292	31.7	8.72	21	1	1.826	2.101	8.318	0.768431	0.668069	0.0819987	34.3	72	62.6	285.2	1.42	43.79	47.21	38.33	High	High	High	High	High	High	High	High
FALSE	High	Master Protein	NP_996416.1	cacophony, isoform F [Drosophila melanogaster]	0.002	14.252	4	5	5	5	1	1851	212.4	7.88	103	5	1.825	1.27	1.361	0.0360655	0.377592	0.219988	76.3	97	139.3	103.9	3.01	1.02	2.2	1.94	High	High	High	High	High	High	High	High
FALSE	High	Master Protein	NP_731573.1	sarcomere length short, isoform B [Drosophila melanogaster]	0	66.571	24	25	36	24	1	935	104.8	5.57	507	25	1.825	2.818	1.266	0.395833	0.13796	1	60.4	170.1	110.2	76.4	7.31	25.91	25.2	9.69	High	High	High	High	High	High	High	High
FALSE	High	Master Protein	NP_001245936.1	connector of kinase to AP-1, isoform E [Drosophila melanogaster]	0	22.519	13	6	9	6	1	749	80.1	5.06	205	6	1.824	2.122	2.11	0.0218385	0.0224811	0.0217859	60	127.3	109.4	126.6	1.42	6.16	6.98	9.1	High	High	High	High	High	High	High	High
FALSE	High	Master Protein	NP_001097850.3	uncharacterized protein Dmel_CG31191, isoform D [Drosophila melanogaster]	0.008	4.954	4	2	4	2	1	495	56.2	9.41	57	2	1.823	1.623	1.797	0.089379	0.18624	0.125759	69.4	112.6	126.5	124.7	4.34	2	3.11	3.46	High	High	High	High	High	High	High	High
FALSE	High	Master Protein	NP_001189286.1	uncharacterized protein Dmel_CG11089, isoform B [Drosophila melanogaster]	0	148.627	47	29	104	29	1	590	63.3	7.87	2873	29	1.822	1.195	1.587	0.0912738	0.929916	0.211565	77.4	92.6	141.1	122.9	3.17	20	7.14	4.94	High	High	High	High	High	High	High	High
FALSE	High	Master Protein	NP_001247301.1	ribosomal protein S27, isoform B [Drosophila melanogaster]	0	50.15	30	6	37	6	1	84	9.4	9.52	471	6	1.821	2.072	1.757	0.441788	0.34886	0.549168	64.1	132.7	116.7	112.6	16.15	1.42	0.71	9.91	High	High	High	High	High	High	High	High
FALSE	High	Master Protein	NP_001259867.1	neural lazarillo, isoform B [Drosophila melanogaster]	0	38.031	29	7	21	7	1	245	27.1	5.12	750	7	1.821	0.255	1.692	0.284029	0.0488173	0.424254	86.8	22.1	158.1	146.8	13.5	41.98	3.23	2.32	High	High	High	High	High	High	High	High
FALSE	High	Master Protein	NP_610379.2	COP9 signalosome subunit 7 [Drosophila melanogaster]	0.004	7.743	4	1	2	1	1	278	31	6.7	93	1	1.82	1.539	2.055	0.0928714	0.253367	0.0819987	65	100	118.3	133.6	10.59	21.37	4.63	11.1	High	High	High	High	High	High	High	High
FALSE	High	Master Protein	NP_476879.1	tolkin, isoform A [Drosophila melanogaster]	0	16.293	5	4	6	4	1	1464	165.1	6.3	149	4	1.82	1.642	1.38	0.135897	0.255209	0.571383	73.5	120.6	133.7	101.4	3.76	13.42	20.32	20.99	High	High	High	High	High	High	High	High
FALSE	High	Master Protein	NP_612019.2	DISCO interacting protein 2, isoform A [Drosophila melanogaster]	0.002	10.572	2	4	5	4	1	1773	194	7.62	85	4	1.82	1.823	1.856	0.170135	0.200098	0.190362	65.2	118.9	118.7	121	9.46	3.38	0.61	0.02	High	High	High	High	High	High	High	High
FALSE	High	Master Protein	NP_723725.1	Threonyl-tRNA synthetase, isoform A [Drosophila melanogaster]	0	88.453	28	23	44	23	1	747	85.9	7.78	960	23	1.819	1.01	1.169	0.114106	1	1	82.8	83.7	150.7	96.8	12.32	20.69	6.12	14.98	High	High	High	High	High	High	High	High
FALSE	High	Master Protein	NP_731377.1	karyopherin alpha3, isoform A [Drosophila melanogaster]	0	32.658	17	8	17	8	1	514	57	5.26	383	8	1.818	1.815	1.644	0.0728048	0.095341	0.149965	67.6	122.7	122.9	111.1	4.01	6.4	0	2.12	High	High	High	High	High	High	High	High
FALSE	High	Master Protein	NP_730054.1	argonaute 2, isoform C [Drosophila melanogaster]	0	68.336	34	20	38	20	1	1217	137.1	9.58	676	20	1.818	1.788	1.652	0.165842	0.209631	0.29015	65.8	117.6	119.6	108.7	5.05	18.86	4.69	9.52	High	High	High	High	High	High	High	High
FALSE	High	Master Protein	NP_733270.1	vacuolar H[+] ATPase 100kD subunit 1, isoform C [Drosophila melanogaster]	0	161.325	25	29	172	4	1	855	97.1	6.98	4212	29	1.817	1.236	1.643	0.0360655	0.470288	0.0787821	74.5	92.1	135.3	122.4	4.17	16.75	3.32	5.18	High	High	High	High	High	High	High	High
FALSE	High	Master Protein	NP_001246058.1	small glutamine-rich tetratricopeptide containing protein, isoform B [Drosophila melanogaster]	0	44.829	25	9	30	9	1	331	36.2	4.64	704	9	1.816	1.684	1.945	0.285092	0.430639	0.262441	64.4	108.5	117	125.4	3.17	16.49	3.48	9.74	High	High	High	High	High	High	High	High
FALSE	High	Master Protein	NP_608905.1	regulatory particle non-ATPase 11 [Drosophila melanogaster]	0	22.273	24	6	17	6	1	308	34.4	6.13	167	6	1.816	1.65	1.457	0.19482	0.334136	0.55841	72.7	119.9	131.9	105.9	3.62	34	11.75	6.04	High	High	High	High	High	High	High	High
FALSE	High	Master Protein	NP_732006.2	tropomyosin 1, isoform E [Drosophila melanogaster]	0	280.131	31	45	281	3	1	711	80	5.44	3984	45	1.815	2.2	1.029	0.157358	0.0972813	1	68.1	149.7	123.5	70	3.44	7.3	33.3	2.72	High	High	High	High	High	High	High	High
FALSE	High	Master Protein	NP_001162751.1	retinal degeneration B, isoform H [Drosophila melanogaster]	0	32.579	7	10	15	10	1	1263	139.3	6.76	367	10	1.815	1.615	2.017	0.686333	0.92218	0.610151	66.2	106.8	120.1	133.4	6.89	68.16	10.57	13.06	High	High	High	High	High	High	High	High
FALSE	Medium	Master Protein	NP_649869.1	CG8420, isoform A [Drosophila melanogaster]	0.031	3.136	2	1	1	1	1	531	57.7	6.9	16	1	1.815	2.195	4.659	0.946073	0.854665	0.307404	43.4	95.3	78.8	202.3	63.65	4.15	9.75	37.66	High	High	High	High	High	High	High	High
FALSE	Medium	Master Protein	NP_001259150.1	uncharacterized protein Dmel_CG32803, isoform C [Drosophila melanogaster]	0.022	3.63	6	1	1	1	1	242	25.8	7.08	0	1	1.814	1.676	1.233	0.0708246	0.128957	0.728222	73.8	123.8	134	91.1	3.77	5.57	10.06	15.71	High	High	High	High	High	High	High	High
FALSE	High	Master Protein	NP_610584.2	uncharacterized protein Dmel_CG12896 [Drosophila melanogaster]	0	71.069	50	14	44	1	1	220	24.7	6.43	771	14	1.813	0.754	2.857	0.268869	0.911361	0.0893427	66.5	50.2	120.6	190.1	15.97	6.57	6.17	4.28	High	High	High	High	High	High	High	High
FALSE	High	Master Protein	NP_651048.1	regulatory particle non-ATPase 7 [Drosophila melanogaster]	0	33.251	29	8	12	8	1	389	45.4	6.48	294	8	1.811	1.307	1.434	0.0818512	0.559784	0.325706	75.3	98.5	136.4	108	11.86	22.46	3.5	3.13	High	High	High	High	High	High	High	High
FALSE	High	Master Protein	NP_732013.2	tropomyosin 2, isoform C [Drosophila melanogaster]	0	328.832	77	41	396	2	1	284	33	4.83	5966	41	1.811	2.599	1.235	0.314118	0.125475	1	65.2	169.3	118	80.5	21.07	35.33	6.71	2.82	High	High	High	High	High	High	High	High
FALSE	High	Master Protein	NP_524545.2	protein C kinase 98E, isoform A [Drosophila melanogaster]	0	36.366	17	10	15	10	1	739	83.1	7.05	383	10	1.811	1.662	1.433	0.0413114	0.0786994	0.176005	72.4	120.3	131.1	103.7	9.4	15.33	8.04	4.15	High	High	High	High	High	High	High	High
FALSE	Medium	Master Protein	NP_648426.1	CG6321 [Drosophila melanogaster]	0.031	3.104	3	1	1	1	1	418	47.4	6.79	0	1	1.81	1.502	1.58	0.484083	0.859217	0.762959	74.2	111.5	134.4	117.3	0.02	38.01	8.41	5.77	High	High	High	High	High	High	High	High
FALSE	High	Master Protein	NP_724223.4	fructose-1,6-bisphosphatase, isoform F [Drosophila melanogaster]	0	48.685	33	12	26	12	1	343	37	6.8	604	12	1.808	1.318	1.709	0.026141	0.197013	0.052093	74.1	97.6	133.9	126.6	7.14	11.22	0.01	0.88	High	High	High	High	High	High	High	High
FALSE	High	Master Protein	NP_610746.1	CG8858 [Drosophila melanogaster]	0	39.458	8	15	18	15	1	1890	212	6.86	171	15	1.808	1.511	1.185	0.252723	0.571475	1	78.2	118.1	141.3	92.7	5.41	35.73	3.39	21.06	High	High	High	High	High	High	High	High
FALSE	High	Master Protein	NP_572345.1	CG3168, isoform A [Drosophila melanogaster]	0	55.244	15	11	32	11	1	632	68.9	7.94	638	11	1.807	2.451	1.717	0.0247781	0.0224811	0.0481647	62.5	153.2	112.9	107.3	3.09	8.2	8.51	1.38	High	High	High	High	High	High	High	High
FALSE	High	Master Protein	NP_609146.3	CG7191, isoform A [Drosophila melanogaster]	0.005	6.235	12	3	3	3	1	285	31.4	6.55	52	3	1.805	1.597	2.18	0.35041	0.590184	0.220644	62.7	100.1	113.1	136.6	22.44	12.79	0.24	5.78	High	High	High	High	High	High	High	High
FALSE	High	Master Protein	NP_001245598.1	chitinase 6, isoform C [Drosophila melanogaster]	0	37.805	3	14	16	13	1	4611	505.6	5.27	311	14	1.804	2.389	1.601	0.0595473	0.0356249	0.138763	62.9	150.3	113.5	100.7	9.32	7.17	0.74	15.42	High	High	High	High	High	High	High	High
FALSE	High	Master Protein	NP_523375.2	mushroom bodies tiny [Drosophila melanogaster]	0.002	12.875	9	3	4	3	1	639	69.6	9.5	121	3	1.804	1.771	1.732	0.345681	0.418529	0.447237	63.3	112.2	114.2	109.7	41.64	3.02	23.4	5.92	High	High	High	High	High	High	High	High
FALSE	High	Master Protein	NP_608689.2	Cyp309a2 [Drosophila melanogaster]	0.002	12.725	7	4	5	4	1	538	62.3	9.22	73	4	1.804	0.635	2.677	0.206197	0.414539	0.0797272	72.5	46.1	130.8	194.1	9.89	3.84	0.46	32.98	High	High	High	High	High	High	High	High
[truncated: 4,700 more rows]
