# Supplementary material for: Loss of Drosophila Clueless differentially affects the mitochondrial proteome compared to loss of Sod2 and Pink1
Source: Front Physiol. 2022 Oct 26;13:1004099. doi: 10.3389/fphys.2022.1004099 (PMC9644064; doi:10.3389/fphys.2022.1004099)
Supplement: Supplementary file 6 [file Table5.XLSX]

## Sheet: GO analysis all
Gene Ontology (GO) [Biological Process] analysis of less and more abundant proteins from clu, Sod2 and Pink1 mutants
# Less abundant in clu
Index	Name	P-value	Adjusted p-value	Z-score	Combined score
10	ATP synthesis coupled proton transport (GO:0015986)	8.91e-13	2.017e-11	-2.51	69.72
9	cellular protein metabolic process (GO:0044267)	3.725e-23	1.031e-21	-1.42	73.51
8	mitochondrial electron transport, ubiquinol to cytochrome c (GO:0006122)	1.811e-11	2.818e-10	-3.09	76.36
7	translation (GO:0006412)	1.014e-29	4.206e-28	-1.17	78.11
6	peptide biosynthetic process (GO:0043043)	1.205e-26	4.287e-25	-1.49	89.01
5	mitochondrial translation (GO:0032543)	1.324e-42	8.243e-41	-1.23	118.17
4	mitochondrial gene expression (GO:0140053)	1.324e-42	8.243e-41	-1.39	134.01
3	respiratory electron transport chain (GO:0022904)	4.621e-52	5.753e-50	-1.25	147.18
2	mitochondrial ATP synthesis coupled electron transport (GO:0042775)	2.321e-53	5.778e-51	-1.34	162.37
1	mitochondrial electron transport, NADH to ubiquinone (GO:0006120)	2.138e-37	1.065e-35	-2.01	169.65
# More abundant in clu
Index	Name	P-value	Adjusted p-value	Z-score	Combined score
10	rhodopsin mediated signaling pathway (GO:0016056)	1.239e-05	0.0006044	-3.14	35.45
9	actomyosin structure organization (GO:0031032)	8.429e-08	1.057e-05	-2.19	35.64
8	cellular response to sucrose stimulus (GO:0071329)	6.777e-05	0.001919	-4	38.4
7	cellular response to disaccharide stimulus (GO:0071324)	6.777e-05	0.001919	-4.01	38.45
6	synaptic vesicle budding (GO:0070142)	0.001708	0.01612	-6.79	43.29
5	mitochondrion localization (GO:0051646)	1.722e-07	1.89e-05	-2.87	44.63
4	synaptic vesicle transport (GO:0048489)	5.198e-08	9.127e-06	-2.71	45.4
3	synaptic vesicle localization (GO:0097479)	3.399e-09	2.984e-06	-2.56	49.88
2	establishment of synaptic vesicle localization (GO:0097480)	2.535e-08	5.564e-06	-2.95	51.68
1	synaptic vesicle transport along microtubule (GO:0099517)	2.46e-05	0.0009389	-5.4	57.32
# Less abundant in Sod2
Index	Name	P-value	Adjusted p-value	Z-score	Combined score
10	peptide catabolic process (GO:0043171)	0.001467	0.02303	-2.63	17.17
9	jump response (GO:0007630)	0.01978	0.07395	-4.41	17.32
8	regulation of mitochondrial translation (GO:0070129)	0.01978	0.07395	-4.61	18.08
7	peptide metabolic process (GO:0006518)	0.001139	0.02303	-2.68	18.17
6	mitochondrial electron transport, cytochrome c to oxygen (GO:0006123)	0.0008182	0.02303	-2.58	18.32
5	mitochondrial genome maintenance (GO:0000002)	0.01698	0.07395	-4.89	19.91
4	dicarboxylic acid transport (GO:0006835)	0.0004317	0.01695	-3.22	24.91
3	branched-chain amino acid metabolic process (GO:0009081)	0.0001188	0.006219	-3.95	35.67
2	mitochondrial DNA metabolic process (GO:0032042)	0.0001188	0.006219	-5.58	50.44
1	mitochondrial DNA replication (GO:0006264)	0.0001188	0.006219	-5.73	51.82
# More abundant in Sod2
Index	Name	P-value	Adjusted p-value	Z-score	Combined score
10	mitochondrial membrane organization (GO:0007006)	0.0002547	0.008705	-3.28	27.13
9	receptor clustering (GO:0043113)	0.002249	0.02601	-4.62	28.19
8	positive regulation of organelle organization (GO:0010638)	8.626e-05	0.004742	-3.14	29.36
7	adult somatic muscle development (GO:0007527)	1.471e-05	0.001383	-2.93	32.57
6	mitochondrion localization (GO:0051646)	4.547e-06	0.0005699	-2.87	35.3
5	synaptic vesicle transport along microtubule (GO:0099517)	0.001219	0.0173	-5.27	35.35
4	myofibril assembly (GO:0030239)	1.986e-10	7.466e-08	-1.71	38.31
3	striated muscle cell development (GO:0055002)	1.364e-07	3.419e-05	-2.62	41.37
2	tryptophan metabolic process (GO:0006568)	0.001219	0.0173	-6.89	46.25
1	actomyosin structure organization (GO:0031032)	1.213e-12	9.121e-10	-2.21	60.73
# Less abundant in Pink1
Index	Name	P-value	Adjusted p-value	Z-score	Combined score
10	mitochondrial genome maintenance (GO:0000002)	0.0002346	0.003659	-4.95	41.38
9	mitochondrial DNA metabolic process (GO:0032042)	0.0002346	0.003659	-5.55	46.36
8	mitochondrial DNA replication (GO:0006264)	0.0002346	0.003659	-5.72	47.79
7	gene expression (GO:0010467)	5.97e-23	1.863e-21	-1.07	54.55
6	cellular macromolecule biosynthetic process (GO:0034645)	3.107e-21	6.924e-20	-1.4	66.31
5	cellular protein metabolic process (GO:0044267)	2.114e-21	5.495e-20	-1.43	68.04
4	translation (GO:0006412)	4.521e-28	2.351e-26	-1.17	73.96
3	peptide biosynthetic process (GO:0043043)	4.639e-24	1.809e-22	-1.5	80.46
2	mitochondrial translation (GO:0032543)	5.817e-40	9.074e-38	-1.23	111.09
1	mitochondrial gene expression (GO:0140053)	7.368e-38	5.747e-36	-1.39	118.99
# More abundant in Pink1
Index	Name	P-value	Adjusted p-value	Z-score	Combined score
10	purine-containing compound biosynthetic process (GO:0072522)	0.000981	0.0158	-3.63	25.16
9	carbohydrate catabolic process (GO:0016052)	0.000131	0.004572	-3.05	27.28
8	positive regulation of organelle organization (GO:0010638)	6.227e-05	0.002855	-3.14	30.38
7	regulation of microtubule depolymerization (GO:0031114)	7.346e-06	0.0008756	-2.6	30.78
6	negative regulation of microtubule poly/depoly-merization (GO:0031111)	0.0001128	0.004202	-3.45	31.39
5	maintenance of synapse structure (GO:0099558)	6.227e-05	0.002855	-3.28	31.76
4	maintenance of presynaptic active zone structure (GO:0048790)	6.227e-05	0.002855	-3.35	32.45
3	negative regulation of microtubule depolymerization (GO:0007026)	8.511e-05	0.003382	-3.61	33.81
2	negative regulation of protein depolymerization (GO:1901880)	8.511e-05	0.003382	-3.67	34.42
1	oligosaccharide catabolic process (GO:0009313)	1.375e-06	0.0004098	-2.85	38.44
# up in all three
Index	Name	P-value	Adjusted p-value	Z-score	Combined score
10	regulation of calcium ion-dependent exocytosis (GO:0017158)	0.001429	0.02694	-3.25	21.28
9	negative regulation of microtubule polymerization or depolymerization (GO:0031111)	0.001708	0.02847	-3.42	21.76
8	maintenance of synapse structure (GO:0099558)	0.001173	0.02694	-3.27	22.05
7	'de novo' posttranslational protein folding (GO:0051084)	0.0001958	0.01468	-2.63	22.46
6	maintenance of presynaptic active zone structure (GO:0048790)	0.001173	0.02694	-3.34	22.57
5	negative regulation of microtubule depolymerization (GO:0007026)	0.001429	0.02694	-3.6	23.56
4	negative regulation of protein depolymerization (GO:1901880)	0.001429	0.02694	-3.65	23.88
3	regulation of microtubule depolymerization (GO:0031114)	7.282e-05	0.01092	-2.61	24.83
2	regulation of regulated secretory pathway (GO:1903305)	0.0007347	0.02543	-3.76	27.15
1	positive regulation of organelle organization (GO:0010638)	1.596e-05	0.003592	-3.17	34.98
# down in all three
Index	Name	P-value	Adjusted p-value	Z-score	Combined score
10	peptide biosynthetic process (GO:0043043)	0.0001258	0.0008332	-1.49	13.38
9	nucleosome mobilization (GO:0042766)	0.01253	0.03365	-3.09	13.55
8	axonal transport of mitochondrion (GO:0019896)	0.01253	0.03365	-3.26	14.3
7	DNA-dependent DNA replication (GO:0006261)	0.0006474	0.003431	-1.95	14.31
6	cellular macromolecule biosynthetic process (GO:0034645)	2.453e-05	0.0003251	-1.41	14.97
5	regulation of humoral immune response (GO:0002920)	0.01149	0.03365	-3.43	15.33
4	mitochondrial electron transport, cytochrome c to oxygen (GO:0006123)	0.0001094	0.0008332	-2.58	23.5
3	mitochondrial genome maintenance (GO:0000002)	0.006284	0.0222	-4.93	25.01
2	mitochondrial DNA metabolic process (GO:0032042)	1.571e-05	0.0003251	-5.59	61.8
1	mitochondrial DNA replication (GO:0006264)	1.571e-05	0.0003251	-5.74	63.45

## Sheet: common among mutants
Less abundant proteins common among clu, Sod2 and Pink1 miutants
Index	Name	P-value	Adjusted p-value	Z-score	Combined score
1	mitochondrial DNA replication (GO:0006264)	1.571e-05	0.0003251	-5.74	63.45
2	mitochondrial DNA metabolic process (GO:0032042)	1.571e-05	0.0003251	-5.59	61.8
3	mitochondrial genome maintenance (GO:0000002)	0.006284	0.0222	-4.93	25.01
4	mitochondrial electron transport, cytochrome c to oxygen (GO:0006123)	0.0001094	0.0008332	-2.58	23.5
5	regulation of humoral immune response (GO:0002920)	0.01149	0.03365	-3.43	15.33
6	cellular macromolecule biosynthetic process (GO:0034645)	2.453e-05	0.0003251	-1.41	14.97
7	DNA-dependent DNA replication (GO:0006261)	0.0006474	0.003431	-1.95	14.31
8	axonal transport of mitochondrion (GO:0019896)	0.01253	0.03365	-3.26	14.3
9	nucleosome mobilization (GO:0042766)	0.01253	0.03365	-3.09	13.55
10	peptide biosynthetic process (GO:0043043)	0.0001258	0.0008332	-1.49	13.38
More abundant proteins common among clu, Sod2 and Pink1 miutants
Index	Name	P-value	Adjusted p-value	Z-score	Combined score
1	positive regulation of organelle organization (GO:0010638)	1.596e-05	0.003592	-3.17	34.98
2	regulation of regulated secretory pathway (GO:1903305)	0.0007347	0.02543	-3.76	27.15
3	regulation of microtubule depolymerization (GO:0031114)	7.282e-05	0.01092	-2.61	24.83
4	negative regulation of protein depolymerization (GO:1901880)	0.001429	0.02694	-3.65	23.88
5	negative regulation of microtubule depolymerization (GO:0007026)	0.001429	0.02694	-3.6	23.56
6	maintenance of presynaptic active zone structure (GO:0048790)	0.001173	0.02694	-3.34	22.57
7	'de novo' posttranslational protein folding (GO:0051084)	0.0001958	0.01468	-2.63	22.46
8	maintenance of synapse structure (GO:0099558)	0.001173	0.02694	-3.27	22.05
9	negative regulation of microtubule polymerization or depolymerization (GO:0031111)	0.001708	0.02847	-3.42	21.76
10	regulation of calcium ion-dependent exocytosis (GO:0017158)	0.001429	0.02694	-3.25	21.28
